# Supplementary material for: The role of the NMD factor UPF3B in olfactory sensory neurons
Source: eLife. 2020 Aug 10;9:e57525. doi: 10.7554/eLife.57525 (PMC7452722; doi:10.7554/eLife.57525)
Supplement: Supplementary file 1. — (1) QC metrics, (2) reads count, and (3) TPM values from Upf3b-null (KO) and control (WT) mOSN RNA-seq and RiboTag datasets. (4) The expression of all annotated Olfr genes in Upf3b-null (KO) and control (WT) mOSN samples, based on RNA-seq analysis. [file elife-57525-supp1.xlsx]

## Sheet: QC metrics
	RNA-seq								Ribo-seq
	WT_1	WT_2	WT_3	WT_4	Upf3b-null_1	Upf3b-null_2	Upf3b-null_3	Upf3b-null_4	WT_1	WT_2	WT_3	Upf3b-null_1	Upf3b-null_2	Upf3b-null_3
Total reads number	25097685	23829601	20713680	16905841	29166888	23471037	28783143	14472136	43455320	51292713	52458365	83093349	90189954	71280620
Uniquely mapped reads number	22402229	21406549	18368672	14979694	25975194	20702172	25651356	12613218	35285266	39503644	43229666	63961070	69221289	41786961
Uniquely mapped reads %	0.892601	0.898318	0.886789	0.886066	0.890571	0.882031	0.891194	0.871552	0.81199	0.770161	0.824076	0.76975	0.767506	0.586232

## Sheet: reads count
Geneid	symbol	Chr	Start	End	Strand	Length	RNA-seq_KO1	RNA-seq_KO2	RNA-seq_KO3	RNA-seq_KO4	RNA-seq_WT1	RNA-seq_WT2	RNA-seq_WT3	RNA-seq_WT4	Ribo-seq_KO1	Ribo-seq_KO2	Ribo-seq_KO3	Ribo-seq_WT1	Ribo-seq_WT2	Ribo-seq_WT3
ENSMUST00000000001	Gnai3	3;3;3;3;3;3;3;3;3	108107280;108109403;108111935;108112473;108115763;108118301;108123542;108123795;108145888	108109316;108109612;108112088;108112602;108115891;108118458;108123683;108123837;108146146	-;-;-;-;-;-;-;-;-	3262	187	282	387	234	171	136	98	100	1015	1190	673	986	934	1395
ENSMUST00000000003	Pbsn	X;X;X;X;X;X;X	77837901;77841860;77842515;77842897;77845019;77847975;77853409	77838114;77841911;77842616;77843007;77845086;77848114;77853623	-;-;-;-;-;-;-	902	0	0	0	0	0	0	0	0	0	0	0	0	0	0
ENSMUST00000000010	Hoxb9	11;11	96271457;96274624	96272058;96276595	+;+	2574	0	0	0	9	0	0	0	0	0	0	0	0	0	0
ENSMUST00000000028	Cdc45	16;16;16;16;16;16;16;16;16;16;16;16;16;16;16;16;16;16;16;16	18780447;18781896;18784806;18785073;18786769;18786930;18793178;18794762;18795095;18795825;18797349;18798676;18801801;18805382;18807280;18808732;18810389;18811305;18811515;18811804	18780573;18781962;18784882;18785191;18786852;18787068;18793339;18794860;18795226;18795944;18797399;18798737;18801849;18805437;18807423;18808869;18810481;18811364;18811709;18811972	-;-;-;-;-;-;-;-;-;-;-;-;-;-;-;-;-;-;-;-	2143	0	1	0	0	0	0	0	0	1	0	0	0	0	3
ENSMUST00000000033	Igf2	7;7;7;7	142650766;142654300;142655654;142657388	142654052;142654448;142655816;142657496	-;-;-;-	3708	0	0	0	0	0	0	0	0	0	0	0	0	0	0
ENSMUST00000000049	Apoh	11;11;11;11;11;11;11;11	108395293;108395816;108397299;108404811;108407291;108409131;108411995;108414240	108395407;108395992;108397395;108404887;108407479;108409310;108412192;108414396	+;+;+;+;+;+;+;+	1190	0	2	4	2	4	7	0	0	0	1	3	1	4	6
ENSMUST00000000058	Cav2	6;6;6	17281185;17281895;17286897	17281510;17282082;17289115	+;+;+	2733	10	49	32	11	18	7	15	5	218	240	70	247	216	296
ENSMUST00000000080	Klf6	13;13;13;13	5861489;5864768;5866639;5867232	5861842;5865344;5866762;5870393	+;+;+;+	4217	210	222	368	179	287	257	110	94	1033	1230	651	933	1021	1534
ENSMUST00000000087	Scmh1	4;4;4;4;4;4;4;4;4;4;4;4;4;4;4;4;4	120405307;120447033;120453244;120453752;120462013;120463075;120468235;120478002;120483590;120505284;120508086;120515074;120516886;120522455;120524998;120528156;120529134	120405456;120447161;120453306;120453775;120462155;120463145;120468469;120478090;120483833;120505513;120508212;120515274;120517077;120522649;120525063;120528298;120530184	+;+;+;+;+;+;+;+;+;+;+;+;+;+;+;+;+	3353	0	0	0	0	0	0	0	0	0	0	0	0	0	0
ENSMUST00000000090	Cox5a	9;9;9;9;9	57521232;57528956;57530241;57531669;57532282	57521415;57529072;57530362;57531792;57532424	+;+;+;+;+	690	443	394	465	379	423	442	257	296	685	672	430	665	670	667
ENSMUST00000000094	Dlgap4	2;2;2;2;2;2;2	156721070;156745835;156748023;156748944;156760851;156761773;156762685	156721087;156746196;156748102;156749356;156760942;156761999;156762903	+;+;+;+;+;+;+	1411	1	0	0	0	0	0	0	0	0	0	0	1	1	0
ENSMUST00000000095	Tbx2	11;11;11;11;11;11;11	85832551;85834620;85835795;85837053;85837226;85837844;85840568	85833501;85834887;85835941;85837129;85837389;85838481;85841948	+;+;+;+;+;+;+	3626	29	27	43	28	27	14	15	4	148	203	305	199	217	303
ENSMUST00000000096	Tbx4	11;11;11;11;11;11;11;11	85890063;85890857;85898493;85899750;85911107;85911936;85912106;85914129	85890263;85890951;85898612;85899897;85911259;85912024;85912341;85916097	+;+;+;+;+;+;+;+	3011	0	0	0	0	0	0	0	0	0	0	0	0	0	0
ENSMUST00000000109	Cntn1	15;15;15;15;15;15;15;15;15;15;15;15;15;15;15;15;15;15;15;15;15;15;15;15	92128188;92216316;92220447;92228623;92232101;92234425;92242891;92245728;92245961;92250859;92252397;92253910;92255847;92261473;92271234;92291608;92294988;92302954;92305029;92309955;92314488;92317027;92317917;92339513	92128335;92216447;92220479;92228755;92232273;92234520;92243097;92245827;92246142;92250983;92252514;92254060;92255974;92261654;92271354;92291766;92295137;92303024;92305263;92310058;92314674;92317139;92318073;92341953	+;+;+;+;+;+;+;+;+;+;+;+;+;+;+;+;+;+;+;+;+;+;+;+	5646	0	0	0	0	1	0	0	0	3	2	0	3	2	0
ENSMUST00000000122	Ngfr	11;11;11;11;11;11	95568818;95571820;95574191;95577974;95580953;95587484	95571095;95571980;95574443;95578333;95581094;95587735	-;-;-;-;-;-	3446	5	25	18	3	4	2	3	0	19	18	1	27	17	11
ENSMUST00000000127	Wnt3	11;11;11;11;11	103774150;103808150;103811328;103812281;103816077	103774348;103808391;103811593;103812768;103817957	+;+;+;+;+	3076	0	5	8	6	3	1	0	4	8	4	3	3	4	9
ENSMUST00000000128	Wnt9a	11;11;11;11	59306928;59327564;59328502;59330902	59307067;59327820;59328773;59333552	+;+;+;+	3320	0	0	0	0	0	0	0	0	0	0	0	0	0	0
ENSMUST00000000129	Fer	17;17;17;17;17;17;17;17;17;17;17;17;17;17;17;17;17;17	63896018;63907281;63911465;63921613;63923362;63924059;63934290;63941291;63973065;63981480;63991594;64029290;64035447;64037570;64078852;64133441;64137710;64138875	63896283;63907454;63911564;63921796;63923499;63924178;63934412;63941480;63973157;63981686;63991716;64029346;64035562;64037664;64078975;64133595;64137832;64139494	+;+;+;+;+;+;+;+;+;+;+;+;+;+;+;+;+;+	3008	100	114	91	66	92	95	46	52	27	13	0	7	1	32
ENSMUST00000000137	Actr2	11;11;11;11;11;11;11;11;11	20062304;20072456;20077188;20080023;20080662;20091295;20094230;20100823;20112805	20064859;20072588;20077333;20080172;20080798;20091367;20094445;20100933;20112913	-;-;-;-;-;-;-;-;-	3631	727	718	1011	577	713	661	402	321	3044	3160	1011	2871	2763	3378
ENSMUST00000000145	Acsl6	11;11;11;11;11;11;11;11;11;11;11;11;11;11;11;11;11;11;11;11	54304005;54320152;54323241;54323990;54325066;54325561;54327115;54328402;54329920;54335052;54338454;54339000;54340497;54341759;54345176;54345878;54350558;54352022;54352991;54361060	54304068;54320267;54323355;54324054;54325167;54325660;54327293;54328434;54329971;54335125;54338546;54339134;54340592;54341831;54345264;54345994;54350701;54352123;54353062;54361535	+;+;+;+;+;+;+;+;+;+;+;+;+;+;+;+;+;+;+;+	2297	0	0	0	0	0	0	0	0	0	0	0	0	0	0
ENSMUST00000000153	Gna12	5;5;5;5	140758408;140762590;140785397;140829994	140761118;140762640;140785612;140830431	-;-;-;-	3416	836	676	972	668	751	719	273	266	1530	1409	822	1307	1281	1655
ENSMUST00000000161	Itgb2l	16;16;16;16;16;16;16;16;16;16;16;16;16;16;16;16	96422288;96422957;96424903;96426049;96426729;96427674;96428969;96430566;96432580;96433477;96434585;96435620;96437270;96438464;96438740;96443540	96422688;96423118;96425096;96426268;96426973;96427861;96429109;96430655;96432675;96433632;96434742;96435790;96437450;96438552;96438800;96443619	-;-;-;-;-;-;-;-;-;-;-;-;-;-;-;-	2633	0	0	0	0	0	0	0	0	0	0	0	0	0	0
ENSMUST00000000163	Igsf5	16;16;16;16;16;16;16;16;16	96361794;96364007;96372830;96378085;96386486;96391020;96396369;96397891;96403266	96361844;96364084;96373147;96378384;96386626;96391044;96396469;96397964;96404028	+;+;+;+;+;+;+;+;+	1851	0	0	0	0	0	0	0	0	0	0	0	0	0	0
ENSMUST00000000171	Pih1d2	9;9;9;9;9;9	50617321;50618446;50619755;50620945;50621621;50624860	50617598;50618649;50619878;50621190;50621886;50624997	+;+;+;+;+;+	1256	0	0	0	0	0	0	0	0	0	0	0	0	0	0
ENSMUST00000000175	Sdhd	9;9;9;9	50596338;50598761;50600548;50603738	50597250;50598905;50600664;50603849	-;-;-;-	1287	852	737	936	628	834	876	435	511	1747	1678	787	1570	1565	1716
ENSMUST00000000186	Fgf23	6;6;6	127072902;127078140;127080038	127073240;127078243;127081408	+;+;+	1814	4	0	2	0	3	2	3	0	2	3	0	4	0	2
ENSMUST00000000187	Fgf6	6;6;6	127015542;127016994;127023981	127015931;127017097;127024718	+;+;+	1232	0	0	0	0	0	0	0	0	0	0	0	0	0	2
ENSMUST00000000188	Ccnd2	6;6;6;6;6	127125779;127139103;127146023;127148664;127150582	127130487;127139251;127146182;127148879;127151048	-;-;-;-;-	5701	24	99	134	20	34	42	17	7	205	222	88	185	160	317
ENSMUST00000000193	Ccl2	11;11;11	82035571;82036483;82036926	82035737;82036600;82037453	+;+;+	813	0	0	0	0	0	0	0	0	0	0	0	0	0	0
ENSMUST00000000194	Ccl12	11;11;11	82101845;82102611;82103110	82101972;82102728;82103400	+;+;+	537	0	0	0	0	0	0	0	0	0	0	0	0	0	0
ENSMUST00000000199	Ncs1	2;2;2;2;2;2;2;2	31245823;31270612;31280666;31282309;31284147;31284662;31287287;31292284	31246242;31270636;31280804;31282387;31284235;31284739;31287403;31295989	+;+;+;+;+;+;+;+	4653	371	301	509	326	369	286	127	131	1541	1499	950	1235	1321	1594
ENSMUST00000000201	Nalcn	14;14;14;14;14;14;14;14;14;14;14;14;14;14;14;14;14;14;14;14;14;14;14;14;14;14;14;14;14;14;14;14;14;14;14;14;14;14;14;14;14;14;14;14	123276641;123281100;123283584;123285213;123287710;123290967;123291732;123293428;123294334;123295393;123298026;123298871;123299148;123299900;123302698;123302880;123308329;123314032;123315984;123316995;123317221;123317834;123321254;123321460;123323300;123323791;123348762;123369938;123371478;123396207;123409696;123460237;123464664;123486386;123507481;123515301;123515631;123571940;123592682;123592912…	123278361;123281217;123283736;123285363;123287867;123291082;123291864;123293521;123294482;123295461;123298145;123298945;123299254;123299993;123302796;123303000;123308435;123314136;123316151;123317126;123317341;123317890;123321376;123321551;123323369;123323892;123348835;123370079;123371614;123396281;123409833;123460428;123464831;123486517;123507567;123515405;123515773;123572094;123592810;123593051…	-;-;-;-;-;-;-;-;-;-;-;-;-;-;-;-;-;-;-;-;-;-;-;-;-;-;-;-;-;-;-;-;-;-;-;-;-;-;-;-;-;-;-;-	7115	47	27	35	16	32	42	21	17	164	188	57	126	104	175
ENSMUST00000000206	Btbd17	11;11;11	114791217;114793850;114795764	114792522;114794126;114795897	-;-;-	1717	0	0	0	0	0	0	0	0	0	0	0	0	0	0
ENSMUST00000000208	Slfn4	11;11;11;11;11;11;11;11	83175186;83175563;83175828;83176077;83179671;83185268;83186525;83188663	83175393;83175644;83175913;83176799;83179756;83185446;83187564;83190221	+;+;+;+;+;+;+;+	3963	0	1	2	0	0	0	0	0	2	2	1	3	3	3
ENSMUST00000000219	Th	7;7;7;7;7;7;7;7;7;7;7;7;7	142892752;142894008;142894393;142894641;142895089;142895317;142895523;142896029;142896411;142896594;142896928;142897966;142899872	142893190;142894141;142894488;142894697;142895158;142895452;142895668;142896079;142896478;142896682;142897102;142898190;142900014	-;-;-;-;-;-;-;-;-;-;-;-;-	1829	0	0	0	0	0	0	0	0	0	0	0	0	0	0
ENSMUST00000000220	Ins2	7;7;7	142678659;142679347;142679662	142678858;142679559;142679726	-;-;-	478	0	0	0	0	0	0	0	0	0	0	0	0	0	0
ENSMUST00000000221	Scnn1g	7;7;7;7;7;7;7;7;7;7;7;7;7	121734479;121737886;121740297;121742253;121743653;121746587;121760391;121762378;121763011;121763171;121763420;121766238;121767169	121734543;121738234;121740615;121742443;121743756;121746750;121760489;121762495;121763089;121763228;121763481;121766313;121768475	+;+;+;+;+;+;+;+;+;+;+;+;+	2991	26	151	195	39	72	33	14	4	35	92	108	77	94	76
ENSMUST00000000228	Drp2	X;X;X;X;X;X;X;X;X;X;X;X;X;X;X;X;X;X;X;X;X	134423830;134428314;134430475;134431531;134433791;134434425;134435023;134437021;134437410;134438819;134439920;134440335;134441662;134443652;134446215;134446628;134446962;134447848;134449652;134452168;134452576	134423953;134428477;134430631;134431651;134434059;134434571;134435101;134437081;134437471;134438893;134440121;134441386;134441828;134443763;134446351;134446693;134447027;134447991;134449889;134452288;134453400	+;+;+;+;+;+;+;+;+;+;+;+;+;+;+;+;+;+;+;+;+	4389	0	0	0	0	0	0	0	0	0	0	0	0	0	0
ENSMUST00000000253	Lhx2	2;2;2;2;2	38350759;38353311;38354449;38359898;38368842	38351893;38353513;38354852;38360103;38369733	+;+;+;+;+	2840	627	608	784	482	728	609	419	301	1182	1060	924	1016	985	1251
ENSMUST00000000254	Clec2g	6;6;6;6;6;6;6	128934381;128948696;128979396;128980184;128981205;128981862;128982946	128934482;128948802;128979478;128980309;128981383;128981968;128984704	+;+;+;+;+;+;+	2463	0	0	0	0	0	0	0	0	0	0	0	0	0	0
ENSMUST00000000260	Gmpr	13;13;13;13;13;13;13;13;13	45507444;45514395;45516999;45520852;45529708;45532294;45539025;45542479;45545873	45507743;45514514;45517082;45521025;45529789;45532400;45539067;45542638;45546382	+;+;+;+;+;+;+;+;+	1580	6	38	53	22	13	9	4	7	169	201	301	223	259	223
ENSMUST00000000266	Ifi202b	1;1;1;1;1;1;1	173962569;173963794;173971353;173972191;173974733;173977265;173982674	173962823;173963982;173971757;173972379;173975146;173977437;173982844	-;-;-;-;-;-;-	1796	4	5	7	1	3	1	2	5	20	21	2	25	31	55
ENSMUST00000000275	Glra3	8;8;8;8;8;8;8;8;8;8	55940509;55991126;56005117;56039582;56062431;56085114;56088984;56110447;56112830;56125074	55940974;55991253;56005184;56039805;56062513;56085251;56089198;56110590;56112874;56125429	+;+;+;+;+;+;+;+;+;+	1867	0	0	0	0	0	0	0	0	0	0	0	0	0	0
ENSMUST00000000284	Trim25	11;11;11;11;11;11;11;11	88999376;89004729;89009119;89010805;89013476;89015533;89015719;89016195	89000082;89004824;89009352;89010973;89013538;89015631;89015817;89020293	+;+;+;+;+;+;+;+	5566	0	0	0	0	0	0	0	0	0	0	0	0	0	0
ENSMUST00000000285	Dgke	11;11;11;11;11;11;11;11;11;11;11	89037582;89041448;89042162;89044240;89048889;89049849;89050319;89050669;89052427;89055358;89059931	89040911;89041559;89042289;89044311;89049002;89049900;89050476;89050812;89052546;89055517;89060748	-;-;-;-;-;-;-;-;-;-;-	5208	0	0	0	0	0	0	0	0	0	0	0	0	0	0
ENSMUST00000000287	Scpep1	11;11;11;11;11;11;11;11;11;11;11;11;11	88924020;88929165;88930208;88933448;88934578;88935823;88937014;88941284;88943797;88944375;88947145;88952406;88955294	88924724;88929328;88930345;88933561;88934671;88935951;88937051;88941356;88943871;88944530;88947234;88952554;88955465	-;-;-;-;-;-;-;-;-;-;-;-;-	2097	55	149	239	111	130	94	56	64	397	348	26	267	153	261
ENSMUST00000000291	Mnt	11;11;11;11;11;11	74830920;74836363;74837431;74837612;74842161;74842551	74831401;74836948;74837472;74837723;74842353;74845725	+;+;+;+;+;+	4590	246	195	361	189	287	240	76	54	1193	1284	689	1016	1061	1298
ENSMUST00000000299	Itgb2	10;10;10;10;10;10;10;10;10;10;10;10;10;10;10;10	77530252;77541966;77542398;77546013;77547126;77548546;77549946;77550973;77556088;77557390;77557952;77559479;77560150;77561013;77564638;77565178	77530459;77542026;77542486;77546193;77547296;77548787;77550101;77551068;77556177;77557530;77558139;77559723;77560372;77561215;77564804;77565686	+;+;+;+;+;+;+;+;+;+;+;+;+;+;+;+	2970	2	19	51	0	1	2	1	1	1	2	0	2	2	3
ENSMUST00000000304	Hddc2	10;10;10;10;10;10	31313382;31314515;31316293;31320268;31326022;31327881	31313483;31314636;31316395;31320336;31326160;31328204	+;+;+;+;+;+	859	0	0	0	0	0	0	0	0	1	0	0	1	0	0
ENSMUST00000000305	Tpd52l1	10;10;10;10;10;10;10	31332380;31338185;31341140;31346611;31357872;31379215;31445712	31332969;31338245;31341178;31346712;31358020;31379330;31445921	-;-;-;-;-;-;-	1267	8	11	27	14	20	18	1	6	120	126	57	89	154	125
ENSMUST00000000310	Pemt	11;11;11;11;11;11;11	59970614;59971184;59974068;59976839;59983443;60031713;60046344	59970875;59971258;59974179;59976984;59983558;60031820;60046477	-;-;-;-;-;-;-	953	0	0	0	0	0	0	0	0	0	0	0	0	0	0
ENSMUST00000000312	Cdh1	8;8;8;8;8;8;8;8;8;8;8;8;8;8;8;8	106603351;106604287;106649001;106653507;106653764;106656824;106657740;106658191;106659590;106660796;106661885;106663747;106664196;106665394;106666187;106668406	106603542;106604407;106649224;106653650;106653919;106656968;106657915;106658319;106659772;106661040;106662030;106663971;106664423;106665524;106666330;106670246	+;+;+;+;+;+;+;+;+;+;+;+;+;+;+;+	4430	15	164	274	137	72	49	16	18	862	1110	774	1003	1146	977
ENSMUST00000000314	Cdh4	2;2;2;2;2;2;2;2;2;2;2;2;2;2;2;2	179442431;179444700;179780254;179797458;179842969;179847220;179860117;179874072;179881810;179885854;179886720;179889089;179890743;179893192;179894028;179895712	179442678;179444811;179780480;179797628;179843124;179847364;179860289;179874209;179881995;179886107;179886862;179889322;179890976;179893331;179894192;179899373	+;+;+;+;+;+;+;+;+;+;+;+;+;+;+;+	6388	356	250	367	214	220	276	114	81	994	856	258	665	682	996
ENSMUST00000000317	Ckmt1	2;2;2;2;2;2;2;2;2	121358610;121359579;121359945;121360556;121360903;121361106;121362675;121362975;121363498	121359001;121359777;121360040;121360777;121360988;121361229;121362809;121363100;121363737	+;+;+;+;+;+;+;+;+	1620	5	2	0	1	2	8	0	0	8	10	0	6	3	5
ENSMUST00000000326	Bcl6b	11;11;11;11;11;11;11;11;11	70224128;70226487;70226709;70226909;70227627;70228034;70228488;70228981;70229710	70226143;70226624;70226839;70227073;70227751;70228381;70228709;70229171;70229739	-;-;-;-;-;-;-;-;-	3366	6	8	17	3	5	4	3	5	79	105	157	70	104	87
ENSMUST00000000327	Clec10a	11;11;11;11;11;11;11;11;11;11	70166667;70167817;70168583;70169129;70169308;70169459;70169736;70169926;70170160;70170418	70166816;70168004;70168696;70169224;70169379;70169530;70169822;70170077;70170266;70170833	+;+;+;+;+;+;+;+;+;+	1454	0	0	0	0	0	0	0	0	0	0	0	0	0	0
ENSMUST00000000329	Alox12	11;11;11;11;11;11;11;11;11;11;11;11;11;11	70241457;70242685;70242977;70245861;70246895;70247260;70250047;70251450;70252398;70252795;70253011;70253247;70254409;70255138	70242564;70242855;70243077;70245982;70247064;70247346;70250256;70251593;70252558;70252898;70253133;70253328;70254610;70255353	-;-;-;-;-;-;-;-;-;-;-;-;-;-	3001	8	23	44	22	32	34	19	13	137	123	44	126	124	133
ENSMUST00000000335	Comt	16;16;16;16;16;16	18407544;18410683;18411127;18411690;18424304;18426356	18408040;18410814;18411320;18411957;18424360;18426385	-;-;-;-;-;-	1178	0	0	2	1	0	0	0	0	3	0	0	4	0	3
ENSMUST00000000342	Ccl11	11;11;11	82057823;82061679;82062206	82058042;82061790;82062955	+;+;+	1082	0	0	0	0	1	0	0	0	1	4	0	0	0	1
ENSMUST00000000348	Rtca	3;3;3;3;3;3;3;3;3;3;3	116488963;116492983;116494083;116495636;116497590;116499546;116501112;116504345;116506835;116507751;116507945	116489338;116493087;116494177;116495694;116497714;116499687;116501170;116504468;116506978;116507851;116508208	-;-;-;-;-;-;-;-;-;-;-	1594	1	0	0	0	0	0	0	0	5	4	1	5	8	2
ENSMUST00000000349	Dbt	3;3;3;3;3;3;3;3;3;3;3	116513070;116520237;116523352;116533255;116534745;116539089;116539655;116543768;116545982;116546294;116548033	116513191;116520360;116523427;116533436;116534866;116539305;116539821;116543845;116546173;116546365;116549976	+;+;+;+;+;+;+;+;+;+;+	3296	140	150	211	106	181	122	70	61	731	709	690	691	694	1020
ENSMUST00000000356	Dazap2	15;15;15;15	100615628;100616913;100617925;100619368	100615724;100617031;100618170;100620731	+;+;+;+	1826	1526	1449	1699	1216	1508	1419	817	881	2535	2354	797	2215	2124	2593
ENSMUST00000000365	Mcts1	X;X;X;X;X;X	38600655;38601929;38602576;38605939;38611766;38613221	38600778;38602081;38602673;38606072;38611833;38613426	+;+;+;+;+;+	783	1	0	2	0	1	2	2	3	18	19	5	22	16	21
ENSMUST00000000369	Rem1	2;2;2;2;2	152626951;152627900;152629177;152633456;152634446	152627046;152628435;152629256;152633657;152635194	+;+;+;+;+	1663	4	4	0	4	2	4	3	2	9	5	0	5	12	12
ENSMUST00000000384	Trappc10	10;10;10;10;10;10;10;10;10;10;10;10;10;10;10;10;10;10;10;10;10;10;10	78186725;78188756;78193359;78196288;78197738;78199044;78200618;78201432;78202880;78203881;78207434;78207892;78209384;78210378;78210764;78211476;78214568;78217150;78220189;78222664;78228779;78231454;78244436	78188094;78188950;78193536;78196458;78197864;78199144;78200847;78201590;78203021;78204392;78207546;78208032;78209475;78210454;78210878;78211622;78214815;78217261;78220384;78222860;78228914;78231535;78244642	-;-;-;-;-;-;-;-;-;-;-;-;-;-;-;-;-;-;-;-;-;-;-	5048	1218	922	1189	821	1018	924	292	301	1466	1235	473	1068	1050	1568
ENSMUST00000000388	Ccm2	11;11;11;11;11;11;11;11;11;11	6546887;6569964;6584520;6585034;6589432;6590753;6593067;6593602;6594148;6596081	6547029;6570137;6584603;6585217;6589568;6590888;6593124;6593740;6594286;6596744	+;+;+;+;+;+;+;+;+;+	1858	0	0	0	1	0	0	0	0	4	2	0	4	4	4
ENSMUST00000000394	Tbrg4	11;11;11;11;11;11;11;11;11;11;11;11	6616423;6617308;6617518;6617963;6618460;6618997;6619556;6619972;6620742;6623816;6625149;6625965	6616714;6617422;6617629;6618208;6618604;6619110;6619713;6620143;6621065;6624283;6625213;6626043	-;-;-;-;-;-;-;-;-;-;-;-	2290	1	0	0	0	1	2	0	0	0	1	0	2	0	2
ENSMUST00000000395	Tmprss2	16;16;16;16;16;16;16;16;16;16;16;16;16;16	97564684;97567023;97567596;97568408;97568894;97570375;97572005;97576216;97578530;97590820;97591424;97596740;97599255;97611019	97566151;97567175;97567738;97568503;97569069;97570543;97572048;97576326;97578656;97590939;97591510;97596959;97599322;97611195	-;-;-;-;-;-;-;-;-;-;-;-;-;-	3159	23	76	176	133	27	27	8	7	540	717	531	723	669	894
ENSMUST00000000402	Fap	2;2;2;2;2;2;2;2;2;2;2;2;2;2;2;2;2;2;2;2;2;2;2;2;2	62501184;62502442;62502800;62503365;62504506;62512386;62517520;62518467;62518994;62524193;62528655;62530708;62532962;62533131;62536990;62542131;62544287;62546558;62547755;62548570;62552274;62553783;62554745;62573439;62573846	62501288;62502515;62502872;62503429;62504605;62512440;62517714;62518536;62519092;62524240;62528779;62530761;62533032;62533235;62537034;62542266;62544390;62546712;62547875;62548642;62552326;62553857;62554839;62573523;62573851	-;-;-;-;-;-;-;-;-;-;-;-;-;-;-;-;-;-;-;-;-;-;-;-;-	2187	0	0	0	0	0	0	0	0	0	0	0	0	0	0
ENSMUST00000000412	Egfl6	X;X;X;X;X;X;X;X;X;X;X;X	166523007;166527314;166531972;166536200;166538414;166546421;166548823;166552425;166556970;166562942;166568409;166585456	166523971;166527579;166532073;166536280;166538734;166546543;166548957;166552544;166557089;166563034;166568521;166585720	-;-;-;-;-;-;-;-;-;-;-;-	2704	4	11	16	1	3	3	2	0	15	31	17	11	24	16
ENSMUST00000000421	Tssk3	4;4	129489014;129490462	129489732;129491022	-;-	1280	0	0	0	2	0	0	2	0	1	0	0	0	2	0
ENSMUST00000000430	Galnt1	18;18;18;18;18;18;18;18;18;18;18;18;18	24205344;24232599;24238242;24246050;24254518;24264325;24267528;24269448;24271586;24272662;24279944;24282102;24284710	24205518;24232653;24238485;24246224;24254684;24264532;24267698;24269565;24271766;24272801;24280042;24282236;24286818	+;+;+;+;+;+;+;+;+;+;+;+;+	3977	9	5	11	3	9	9	4	3	8	4	2	9	2	9
ENSMUST00000000445	Myf5	10;10;10	107482908;107484646;107485431	107484210;107484721;107486134	-;-;-	2083	0	1	0	0	0	1	0	0	0	1	0	0	0	0
ENSMUST00000000449	Mkrn2	6;6;6;6;6;6;6;6	115601938;115609581;115610519;115611635;115613327;115614575;115617298;115617594	115602013;115609709;115610700;115611939;115613541;115614685;115617442;115618670	+;+;+;+;+;+;+;+	2240	370	351	403	279	399	416	141	201	578	466	104	454	422	765
ENSMUST00000000450	Pparg	6;6;6;6;6;6;6	115422066;115439840;115441492;115450944;115463086;115472861;115489948	115422192;115440067;115441661;115451082;115463285;115473311;115490401	+;+;+;+;+;+;+	1769	0	0	0	0	0	0	0	0	0	0	0	0	0	0
ENSMUST00000000451	Raf1	6;6;6;6;6;6;6;6;6;6;6;6;6;6;6;6;6	115618569;115619559;115619785;115620209;115621816;115622877;115623464;115626291;115626712;115626939;115631215;115632897;115634553;115634978;115637599;115644410;115676236	115619409;115619693;115619916;115620327;115621862;115623053;115623548;115626408;115626839;115626966;115631368;115632995;115634710;115635080;115637711;115644642;115676635	-;-;-;-;-;-;-;-;-;-;-;-;-;-;-;-;-	3070	0	0	0	0	0	0	0	0	0	1	0	0	0	0
ENSMUST00000000466	Plin2	4;4;4;4;4;4;4;4	86656565;86658581;86660088;86661934;86664429;86668367;86668650;86669945	86657404;86658715;86660269;86662213;86664511;86668562;86668705;86670060	-;-;-;-;-;-;-;-	1888	1	9	15	2	4	8	0	5	47	54	145	52	78	53
ENSMUST00000000476	Pdgfra	5;5;5;5;5;5;5;5;5;5;5;5;5;5;5;5;5;5;5;5;5;5;5	75152291;75162231;75163535;75166511;75167837;75170495;75170762;75173389;75174945;75176667;75177645;75177930;75180168;75180999;75181522;75182976;75185514;75185951;75187863;75189020;75189231;75192431;75194953	75152457;75162291;75163852;75166771;75167967;75170666;75170951;75173504;75175071;75176860;75177739;75178062;75180272;75181109;75181675;75183142;75185629;75186073;75187974;75189119;75189336;75192672;75198204	+;+;+;+;+;+;+;+;+;+;+;+;+;+;+;+;+;+;+;+;+;+;+	6553	0	0	0	0	0	0	0	0	0	2	0	0	4	2
ENSMUST00000000500	Pdgfb	15;15;15;15;15;15;15	79995900;79997556;80000329;80001682;80003325;80005469;80013936	79997257;79997704;80000473;80001887;80003414;80005565;80014808	-;-;-;-;-;-;-	2918	3	27	18	7	5	10	0	0	61	85	90	72	67	59
ENSMUST00000000505	Mcm7	5;5;5;5;5;5;5;5;5;5;5;5;5;5;5	138164583;138165052;138165910;138166683;138167046;138167551;138167841;138168058;138168333;138168810;138169098;138169349;138169560;138170317;138171726	138164920;138165161;138166078;138166766;138167439;138167634;138167972;138168172;138168482;138168947;138169278;138169473;138169724;138170396;138172422	-;-;-;-;-;-;-;-;-;-;-;-;-;-;-	2962	112	145	222	100	103	104	48	58	275	261	27	230	211	335
ENSMUST00000000514	Serpinb8	1;1;1;1;1;1;1	107590006;107597460;107598900;107602800;107604604;107605784;107606921	107590287;107597637;107599037;107602917;107604746;107605936;107608909	+;+;+;+;+;+;+	3001	0	0	0	0	0	0	0	0	0	0	0	0	0	0
ENSMUST00000000542	Acvrl1	15;15;15;15;15;15;15;15;15;15;15	101128522;101128927;101134607;101135298;101135749;101136128;101136984;101137364;101138208;101141067;101143343	101128583;101129063;101134743;101135543;101135960;101136227;101137130;101137639;101138405;101141197;101145336	+;+;+;+;+;+;+;+;+;+;+	3640	0	0	0	0	0	0	0	0	0	0	0	0	0	0
ENSMUST00000000543	Grasp	15;15;15;15;15;15;15;15	101224207;101226914;101228832;101228991;101230534;101230725;101230985;101231517	101224544;101226963;101228886;101229093;101230627;101230791;101231051;101232755	+;+;+;+;+;+;+;+	2013	22	172	151	11	73	21	25	37	149	139	140	156	192	145
ENSMUST00000000544	Acvr1b	15;15;15;15;15;15;15;15;15	101174067;101193932;101194809;101198784;101201978;101202938;101204453;101209080;101210737	101174235;101194171;101195057;101199014;101202145;101203094;101204577;101209210;101213679	+;+;+;+;+;+;+;+;+	4413	979	767	1002	711	957	819	303	204	2159	1981	450	1756	1511	2546
ENSMUST00000000572	Gabra2	5;5;5;5;5;5;5;5;5;5	70961057;70973425;71006107;71007923;71012701;71014416;71034730;71091972;71094532;71095575	70962098;70973627;71006259;71008066;71012783;71014636;71034797;71092087;71094618;71095849	-;-;-;-;-;-;-;-;-;-	2392	0	0	1	1	1	2	0	0	0	0	0	1	1	1
ENSMUST00000000573	Ovgp1	3;3;3;3;3;3;3;3;3;3;3	105973711;105974413;105974839;105975971;105977664;105978274;105979898;105980092;105981233;105985053;105986069	105973840;105974442;105975043;105976027;105977829;105978398;105980006;105980277;105981349;105985188;105987423	+;+;+;+;+;+;+;+;+;+;+	2616	74	81	93	73	85	71	43	20	100	109	27	65	61	143
ENSMUST00000000574	Adora3	3;3	105904423;105907289	105905152;105908928	+;+	2370	0	0	2	0	0	0	0	0	0	0	1	0	2	0
ENSMUST00000000579	Sox9	11;11;11	112782224;112783809;112784672	112783015;112784062;112787760	+;+;+	4135	14	116	91	65	36	34	9	23	269	392	868	308	454	258
ENSMUST00000000590	Rdx	9;9;9;9;9;9;9;9;9;9;9;9;9;9	52047941;52060832;52063578;52064860;52065645;52067361;52068130;52068807;52069615;52073154;52081019;52082443;52085103;52086315	52048432;52060903;52063661;52064955;52065919;52067444;52068276;52068903;52069778;52073284;52081179;52082535;52085345;52088737	+;+;+;+;+;+;+;+;+;+;+;+;+;+	4562	0	0	0	0	0	0	0	0	0	0	0	0	0	0
ENSMUST00000000594	C1d	11;11;11;11;11	17257594;17262648;17263609;17263951;17266531	17257658;17262794;17263675;17264006;17269176	+;+;+;+;+	2981	86	100	105	46	74	74	83	67	801	814	730	722	845	783
ENSMUST00000000608	Gm2a	11;11;11;11	55098115;55103587;55108898;55109378	55098244;55103748;55109080;55113029	+;+;+;+	4127	120	251	491	77	101	123	29	44	394	344	162	297	346	339
ENSMUST00000000619	Clcn4	7;7;7;7;7;7;7;7;7;7;7;7;7	7282316;7287646;7288875;7290399;7291411;7293038;7293915;7294733;7294996;7295970;7296724;7298692;7299241	7284274;7287862;7289273;7290585;7291956;7293118;7294121;7294855;7295183;7296069;7296878;7298836;7299511	-;-;-;-;-;-;-;-;-;-;-;-;-	4578	1566	1236	1474	1113	1326	1264	614	575	2742	2533	1320	2233	2105	2888
ENSMUST00000000631	Grm6	11;11;11;11;11;11;11;11;11;11	50850986;50853190;50853965;50855684;50856957;50857200;50859257;50859494;50862977;50864461	50851627;50853406;50854100;50855838;50857097;50857400;50859402;50860117;50863288;50866177	+;+;+;+;+;+;+;+;+;+	4291	0	0	0	0	0	0	0	0	0	0	0	0	0	0
ENSMUST00000000632	Zfp354c	11;11;11;11	50814564;50817119;50817809;50826426	50815993;50817211;50817935;50826458	-;-;-;-	1683	0	0	0	0	0	0	0	0	0	0	0	0	0	0
ENSMUST00000000641	Sema4f	6;6;6;6;6;6;6;6;6;6;6;6;6;6	82911885;82914367;82917322;82917589;82917823;82918184;82918532;82919317;82919563;82930898;82935587;82935895;82937061;82939461	82914104;82914425;82917482;82917698;82918045;82918331;82918710;82919468;82919682;82930991;82935685;82935954;82937212;82939769	-;-;-;-;-;-;-;-;-;-;-;-;-;-	4086	172	135	202	114	201	166	70	49	1040	868	457	857	783	923
ENSMUST00000000642	Hk2	6;6;6;6;6;6;6;6;6;6;6;6;6;6;6;6;6;6	82725025;82728712;82729545;82730768;82731048;82732101;82734848;82735247;82736530;82738287;82739519;82742803;82743268;82743945;82744862;82749189;82760104;82773918	82727454;82728945;82729700;82730951;82731147;82732196;82734967;82735395;82736834;82738520;82739674;82742986;82743367;82744040;82744981;82749337;82760266;82774454	-;-;-;-;-;-;-;-;-;-;-;-;-;-;-;-;-;-	5513	7	33	85	46	8	6	5	4	134	202	25	160	143	230
ENSMUST00000000645	Myo18a	11;11;11;11;11;11;11;11;11;11;11;11;11;11;11;11;11;11;11;11;11;11;11;11;11;11;11;11;11;11;11;11;11;11;11;11;11;11;11;11	77777265;77817619;77817899;77818102;77818581;77818911;77819977;77820798;77821042;77823090;77823276;77823762;77824093;77825103;77827536;77827791;77829177;77829620;77832394;77836417;77840681;77841448;77841919;77842148;77842457;77843104;77843517;77845396;77845608;77846372;77846891;77847292;77847925;77849370;77850222;77850746;77853217;77853752;77857723;77864691	77778314;77817706;77818005;77818278;77818794;77819053;77820077;77820861;77821186;77823104;77823446;77823852;77824285;77825183;77827677;77827950;77829363;77829863;77832503;77836482;77840809;77841591;77842008;77842267;77842568;77843231;77843671;77845519;77845808;77846482;77846995;77847438;77848038;77849486;77850305;77850883;77853402;77853891;77857845;77865980	+;+;+;+;+;+;+;+;+;+;+;+;+;+;+;+;+;+;+;+;+;+;+;+;+;+;+;+;+;+;+;+;+;+;+;+;+;+;+;+	7307	0	0	0	0	0	0	0	0	0	0	0	0	0	0
ENSMUST00000000646	Sez6	11;11;11;11;11;11;11;11;11;11;11;11;11;11;11;11	77931012;77953408;77954750;77962855;77968902;77972848;77973094;77973783;77974191;77974440;77975146;77976472;77976744;77977537;77977742;77978029	77931114;77954067;77954883;77963050;77969087;77973016;77973260;77973977;77974329;77974636;77975340;77976663;77976941;77977654;77977844;77979040	+;+;+;+;+;+;+;+;+;+;+;+;+;+;+;+	3964	0	0	0	0	0	0	0	0	0	0	0	0	0	0
ENSMUST00000000674	St7	6;6;6;6;6;6;6;6;6;6;6;6;6;6;6	17743592;17819250;17834617;17844909;17846199;17848004;17852258;17854931;17886004;17904897;17906408;17921989;17930766;17934119;17942670	17743694;17819332;17834776;17844963;17846314;17848079;17852412;17855028;17886118;17904969;17906510;17922139;17930858;17934258;17942966	+;+;+;+;+;+;+;+;+;+;+;+;+;+;+	1818	0	0	0	0	0	0	0	0	0	0	0	0	0	0
ENSMUST00000000687	Haao	17;17;17;17;17;17;17;17;17;17	83831356;83831827;83832327;83834779;83835191;83835475;83838472;83838801;83843196;83846637	83831721;83831909;83832395;83834924;83835234;83835564;83838578;83838884;83843274;83846790	-;-;-;-;-;-;-;-;-;-	1222	6	11	23	1	5	1	5	2	14	11	4	11	13	13
ENSMUST00000000696	Cd52	4;4	134093536;134094934	134093900;134095082	-;-	514	10	77	206	15	9	14	6	10	71	66	84	67	70	63
ENSMUST00000000704	Hoxb6	11;11	96299171;96300669	96299591;96301568	+;+	1321	0	0	0	0	0	0	0	0	0	0	0	0	0	0
ENSMUST00000000707	Loxl3	6;6;6;6;6;6;6;6;6;6;6;6;6;6	83034173;83035455;83037429;83038395;83047988;83048578;83048869;83049184;83049484;83049774;83050116;83050308;83050558;83050800	83034289;83035797;83037592;83038609;83048207;83048758;83049023;83049351;83049646;83050017;83050231;83050444;83050669;83052562	+;+;+;+;+;+;+;+;+;+;+;+;+;+	4098	0	1	2	2	0	0	0	0	1	1	0	0	0	3
ENSMUST00000000717	Tcl1b5	12;12;12;12	105176358;105178920;105179982;105180549	105176555;105179090;105180056;105181143	+;+;+;+	1039	0	0	0	0	0	0	0	0	0	0	0	0	0	0
ENSMUST00000000718	Tcl1b4	12;12;12;12	105202422;105204642;105205852;105206408	105202625;105204812;105205921;105206993	+;+;+;+	1031	0	0	0	0	0	0	0	0	0	0	0	0	0	0
ENSMUST00000000724	Kat2b	17;17;17;17;17;17;17;17;17;17;17;17;17;17;17;17;17;17	53566971;53610864;53624352;53629324;53632537;53638352;53641193;53644614;53648747;53653022;53654439;53659318;53660029;53663535;53665406;53665653;53665823;53670675	53567578;53610990;53624497;53629416;53632718;53638543;53641299;53644736;53648883;53653230;53654565;53659428;53660172;53663649;53665442;53665716;53665907;53672720	+;+;+;+;+;+;+;+;+;+;+;+;+;+;+;+;+;+	4653	896	712	937	618	896	863	480	379	1859	1645	921	1556	1402	2063
ENSMUST00000000727	Rab5b	10;10;10;10;10;10	128677193;128681386;128682824;128683195;128686748;128696186	128679645;128681479;128682946;128683346;128687008;128696268	-;-;-;-;-;-	3166	1351	1068	1338	990	1294	1290	509	546	1040	900	238	778	769	1133
ENSMUST00000000746	Dnmt3l	10;10;10;10;10;10;10;10;10;10;10;10;10	78049842;78050016;78050598;78050916;78051831;78051992;78052712;78053929;78054972;78056845;78057268;78059647;78063187	78049911;78050203;78050684;78050960;78051910;78052104;78052883;78054016;78055066;78056920;78057407;78059732;78063622	+;+;+;+;+;+;+;+;+;+;+;+;+	1676	0	0	0	0	0	0	0	0	0	0	0	0	0	0
ENSMUST00000000755	Sult5a1	8;8;8;8;8;8;8	123142847;123145342;123148051;123148310;123149219;123157439;123158188	123143146;123145522;123148145;123148436;123149433;123157587;123158270	-;-;-;-;-;-;-	1150	0	0	0	0	0	0	0	0	0	0	0	0	1	0
ENSMUST00000000756	Rpl13	8;8;8;8;8;8	123102350;123102653;123102845;123103183;123103898;123105044	123102445;123102762;123102986;123103356;123103954;123105244	+;+;+;+;+;+	780	3	2	2	0	0	1	1	0	8	2	0	5	1	5
ENSMUST00000000759	Chmp1a	8;8;8;8;8;8;8	123204264;123206144;123207473;123207964;123209021;123210216;123212666	123205746;123206331;123207601;123208110;123209098;123210235;123212760	-;-;-;-;-;-;-	2140	505	495	666	415	493	545	198	243	1230	1250	603	1230	1184	1249
ENSMUST00000000767	Rpa1	11;11;11;11;11;11;11;11;11;11;11;11;11;11;11;11;11;11	75300350;75302668;75306108;75307115;75310133;75312300;75312693;75312978;75313301;75314813;75316105;75318412;75328673;75339713;75340290;75341028;75342144;75348226	75301403;75302754;75306215;75307291;75310265;75312448;75312832;75313170;75313369;75314915;75316237;75318531;75328761;75339775;75340398;75341106;75342194;75348310	-;-;-;-;-;-;-;-;-;-;-;-;-;-;-;-;-;-	2942	0	0	0	0	0	0	0	0	1	0	0	0	0	0
ENSMUST00000000769	Serpinf1	11;11;11;11;11;11;11;11	75409769;75410834;75413907;75414921;75415575;75416230;75417909;75422496	75410393;75411044;75414049;75415124;75415730;75416428;75417996;75422701	-;-;-;-;-;-;-;-	1832	1	0	3	2	0	1	0	0	0	0	0	0	1	4
ENSMUST00000000776	Tubgcp3	8;8;8;8;8;8;8;8;8;8;8;8;8;8;8;8;8;8;8;8;8;8	12614277;12616022;12621799;12624818;12625025;12632238;12636946;12637667;12639526;12640701;12641097;12648621;12649690;12650154;12653364;12654234;12655806;12657446;12658300;12661300;12663932;12671955	12615296;12616138;12621939;12624949;12625113;12632373;12637014;12637802;12639715;12640809;12641207;12648787;12649822;12650222;12653489;12654352;12655978;12657657;12658377;12661367;12664039;12672248	-;-;-;-;-;-;-;-;-;-;-;-;-;-;-;-;-;-;-;-;-;-	3797	0	0	0	0	0	0	0	0	0	0	0	0	0	0
ENSMUST00000000783	Oprm1	10;10;10;10	6788809;6828885;6829977;6838405	6789158;6829237;6830497;6838680	+;+;+;+	1500	0	0	0	0	0	0	0	0	0	0	0	0	0	0
ENSMUST00000000793	Polr3d	14;14;14;14;14;14;14;14;14	70438748;70439718;70440014;70440599;70441037;70441304;70442352;70442951;70443333	70439578;70439870;70440279;70440767;70441161;70441455;70442395;70443120;70443471	-;-;-;-;-;-;-;-;-	2049	5	0	3	7	6	4	3	3	5	6	0	3	0	14
ENSMUST00000000804	Ddx3x	X;X;X;X;X;X;X;X;X;X;X;X;X;X;X;X;X	13280970;13284178;13284915;13286034;13287225;13287464;13287785;13288279;13288573;13288780;13289395;13289837;13290179;13290446;13290901;13291163;13291413	13281157;13284235;13284962;13286166;13287383;13287563;13287920;13288364;13288671;13288940;13289539;13289981;13290360;13290563;13291054;13291302;13294052	+;+;+;+;+;+;+;+;+;+;+;+;+;+;+;+;+	4692	1695	1474	1723	1351	1526	1580	1076	862	3713	3643	1188	3413	3273	4133
ENSMUST00000000808	Il12rb1	8;8;8;8;8;8;8;8;8;8;8;8;8;8;8;8	70808449;70809831;70810555;70811039;70812478;70813305;70813653;70814066;70814437;70815702;70816433;70816884;70817212;70819325;70819682;70820515	70808618;70809890;70810669;70811232;70812614;70813371;70813778;70814148;70814674;70815869;70816567;70817039;70817346;70819421;70819763;70821424	+;+;+;+;+;+;+;+;+;+;+;+;+;+;+;+	2873	1	2	1	0	0	0	0	0	6	2	3	3	2	2
ENSMUST00000000809	Slc5a5	8;8;8;8;8;8;8;8;8;8;8;8;8;8;8	70882889;70884921;70886030;70887694;70887954;70888381;70888523;70888826;70889340;70889567;70890217;70891114;70891278;70891652;70892305	70883968;70885036;70886154;70887875;70888040;70888451;70888635;70888914;70889469;70889707;70890371;70891181;70891329;70891717;70892757	-;-;-;-;-;-;-;-;-;-;-;-;-;-;-	2928	9	10	23	5	13	10	3	3	71	84	36	68	89	83
ENSMUST00000000811	Kcnn3	3;3;3;3;3;3;3;3	89520164;89564859;89609318;89645442;89652018;89661121;89662714;89667085	89521404;89564954;89609736;89645583;89652128;89661248;89662783;89667761	+;+;+;+;+;+;+;+	2884	13	7	18	4	12	15	0	0	9	7	0	7	5	5
ENSMUST00000000821	Usp32	11;11;11;11;11;11;11;11;11;11;11;11;11;11;11	84985647;84987269;84988334;84992453;84994386;85005808;85006993;85009959;85017630;85022156;85022731;85025519;85026776;85027101;85029061	84986583;84987361;84988758;84992741;84994577;85005928;85007079;85010143;85017841;85022307;85022905;85025692;85026881;85027239;85029135	-;-;-;-;-;-;-;-;-;-;-;-;-;-;-	3362	0	0	0	0	0	0	0	0	0	0	0	0	0	0
ENSMUST00000000828	Txnrd3	6;6;6;6;6;6;6;6;6;6;6;6;6;6;6;6	89643988;89650526;89651499;89654054;89654349;89656028;89661459;89663077;89664378;89665700;89669305;89669818;89672171;89672968;89674061;89674729	89644402;89650586;89651608;89654158;89654421;89656147;89661601;89663192;89664603;89665792;89669381;89669974;89672278;89673063;89674195;89675529	+;+;+;+;+;+;+;+;+;+;+;+;+;+;+;+	2836	19	18	25	13	16	21	4	3	40	41	3	40	20	71
ENSMUST00000000834	Fasl	1;1;1;1	161780691;161782948;161787105;161787944	161781970;161783004;161787150;161788495	-;-;-;-	1935	0	0	0	0	0	0	0	1	2	5	1	18	5	5
ENSMUST00000000844	Tpd52l2	2;2;2;2;2;2;2	181497181;181499845;181501905;181502876;181508166;181513039;181515080	181497332;181499990;181502053;181502935;181508267;181513087;181517371	+;+;+;+;+;+;+	2950	0	0	0	0	0	0	0	0	0	0	0	0	0	0
ENSMUST00000000881	Bcl11a	11;11;11;11;11	24078056;24085321;24158253;24163146;24172699	24078445;24085650;24158354;24164888;24173194	+;+;+;+;+	3061	5	5	6	5	4	2	2	1	17	24	2	14	13	10
ENSMUST00000000889	Il4	11;11;11;11	53612460;53613904;53618170;53618475	53612653;53614056;53618217;53618669	-;-;-;-	590	2	2	1	1	0	2	0	1	1	0	1	1	0	2
ENSMUST00000000894	E2f1	2;2;2;2;2;2;2	154559634;154561031;154561347;154562938;154563895;154564418;154569067	154560935;154561250;154561461;154563090;154564114;154564508;154569720	-;-;-;-;-;-;-	2755	14	9	5	2	8	3	3	2	12	6	0	2	2	8
ENSMUST00000000895	Necab3	2;2;2;2;2;2;2;2;2;2;2;2;2	154544399;154545255;154546026;154546228;154546670;154546801;154547037;154547425;154554647;154554900;154555584;154557057;154558738	154545167;154545346;154546103;154546340;154546723;154546880;154547155;154547561;154554744;154554925;154555692;154557081;154558866	-;-;-;-;-;-;-;-;-;-;-;-;-	1829	0	0	0	0	0	0	0	0	7	5	0	4	3	8
ENSMUST00000000896	Pxmp4	2;2;2;2	154585758;154592165;154596202;154603517	154588092;154592363;154596264;154603708	-;-;-;-	2789	73	87	126	62	89	63	35	26	377	288	154	266	272	327
ENSMUST00000000901	Dlg3	X;X;X;X;X;X;X;X;X;X;X;X;X;X;X;X;X;X;X	100767722;100771615;100772057;100772367;100772823;100773265;100774072;100775807;100776379;100796686;100806512;100807180;100809862;100812726;100813337;100814204;100814793;100815208;100816219	100768428;100771665;100772181;100772536;100772959;100773409;100774231;100775963;100776481;100796800;100806688;100807255;100809907;100812776;100813438;100814376;100814902;100815299;100818406	+;+;+;+;+;+;+;+;+;+;+;+;+;+;+;+;+;+;+	4885	0	0	0	0	0	0	0	0	0	0	0	0	0	0
ENSMUST00000000904	Gnb1l	16;16;16;16;16;16;16;16;16	18498886;18499046;18540435;18540972;18544111;18545117;18548093;18552367;18564035	18498951;18499140;18540575;18541097;18544273;18545213;18548191;18552582;18566627	+;+;+;+;+;+;+;+;+	3596	0	0	0	0	0	0	0	0	2	1	0	1	0	0
ENSMUST00000000910	Dbh	2;2;2;2;2;2;2;2;2;2;2;2	27165233;27168173;27170312;27171312;27172704;27174815;27177308;27177714;27178188;27180977;27181471;27182666	27165866;27168319;27170569;27171488;27172806;27174981;27177451;27177752;27178247;27181104;27181630;27183200	+;+;+;+;+;+;+;+;+;+;+;+	2552	8	2	7	0	3	2	2	0	10	5	0	7	2	9
ENSMUST00000000924	Mmp11	10;10;10;10;10;10;10;10	75923222;75925420;75926411;75926748;75927129;75927347;75928280;75932334	75924115;75925677;75926627;75926989;75927262;75927490;75928509;75932502	-;-;-;-;-;-;-;-	2288	0	5	4	3	1	2	1	0	18	17	1	9	14	13
ENSMUST00000000925	Smarcb1	10;10;10;10;10;10;10;10;10	75896769;75897445;75904384;75906030;75910154;75911519;75915064;75916773;75921303	75897088;75897576;75904574;75906196;75910281;75911656;75915193;75916911;75921617	-;-;-;-;-;-;-;-;-	1660	1	0	1	2	2	0	1	0	2	4	1	3	4	3
ENSMUST00000000926	Vpreb3	10;10	75948300;75949143	75948409;75949657	+;+	625	0	1	5	1	0	0	0	0	2	4	0	1	2	2
ENSMUST00000000939	Hip1r	5;5;5;5;5;5;5;5;5;5;5;5;5;5;5;5;5;5;5;5;5;5;5;5;5;5;5;5;5;5;5;5	123973628;123989305;123989591;123989937;123990942;123991438;123991744;123994718;123995896;123996039;123996231;123996520;123996771;123996931;123997204;123997364;123997551;123997858;123998786;123999042;123999483;123999771;124000140;124000346;124000602;124000712;124000992;124001206;124001425;124001631;124001788;124002118	123973855;123989368;123989733;123989993;123991022;123991514;123991805;123994858;123995953;123996114;123996371;123996581;123996843;123997114;123997292;123997480;123997652;123998052;123998933;123999128;123999590;123999907;124000250;124000404;124000632;124000774;124001092;124001311;124001548;124001692;124001994;124003211	+;+;+;+;+;+;+;+;+;+;+;+;+;+;+;+;+;+;+;+;+;+;+;+;+;+;+;+;+;+;+;+	4388	444	363	508	324	454	410	167	134	1238	1156	582	1119	1120	1380
ENSMUST00000000940	Nsun5	5;5;5;5;5;5;5;5;5;5	135369953;135370191;135371241;135371498;135373954;135374184;135374927;135375275;135375555;135375876	135370076;135370313;135371415;135371606;135374092;135374299;135375105;135375485;135375698;135376798	+;+;+;+;+;+;+;+;+;+	2243	0	0	0	1	0	0	0	0	1	2	0	1	0	3
ENSMUST00000000958	Top1mt	15;15;15;15;15;15;15;15;15;15;15;15;15;15	75657035;75657684;75663356;75664015;75665587;75666253;75667420;75667822;75668626;75669287;75670062;75674292;75676019;75678653	75657214;75657830;75663450;75664142;75665701;75666321;75667605;75667965;75668770;75669474;75670184;75674413;75676131;75678800	-;-;-;-;-;-;-;-;-;-;-;-;-;-	1903	19	32	42	28	23	22	10	10	102	81	129	75	91	118
ENSMUST00000000964	Hoxa1	6;6	52155590;52157567	52157089;52158317	-;-	2251	0	0	0	0	0	0	0	0	0	0	0	0	0	0
ENSMUST00000000984	Slc7a7	14;14;14;14;14;14;14;14;14;14	54369444;54370093;54372940;54373842;54374214;54374548;54377766;54378996;54408503;54409250	54369886;54370276;54373089;54373938;54374317;54374671;54377910;54379121;54409048;54409472	-;-;-;-;-;-;-;-;-;-	2142	14	22	46	7	14	17	0	4	33	49	9	25	32	76
ENSMUST00000000985	Oxa1l	14;14;14;14;14;14;14;14;14;14	54360841;54361322;54363282;54366709;54367025;54367266;54367588;54367793;54368153;54368318	54360917;54361468;54363495;54366852;54367110;54367430;54367692;54367955;54368233;54369669	+;+;+;+;+;+;+;+;+;+	2534	373	352	526	280	390	366	146	151	1029	810	154	761	690	1071
ENSMUST00000001002	Heatr6	11;11;11;11;11;11;11;11;11;11;11;11;11;11;11;11;11;11;11;11	83753696;83755710;83757310;83758289;83759304;83760899;83764886;83765853;83767078;83769056;83769668;83772245;83773870;83774422;83775701;83776614;83777238;83778845;83779401;83781151	83753941;83755817;83757450;83758404;83759418;83761000;83765023;83766160;83767255;83769262;83769767;83772600;83773992;83774508;83775835;83776736;83777362;83778941;83779605;83783754	+;+;+;+;+;+;+;+;+;+;+;+;+;+;+;+;+;+;+;+	5614	173	122	168	118	141	138	63	53	826	700	189	558	527	783
ENSMUST00000001008	Ccl3	11;11;11	83647844;83648569;83649202	83648343;83648680;83649355	-;-;-	766	1	12	10	2	3	0	0	4	4	5	0	3	5	8
ENSMUST00000001009	Wfdc18	11;11;11	83709015;83709857;83711156	83709199;83709999;83711348	+;+;+	521	0	1	0	0	1	0	0	0	2	9	3	4	2	2
ENSMUST00000001027	Aox1	1;1;1;1;1;1;1;1;1;1;1;1;1;1;1;1;1;1;1;1;1;1;1;1;1;1;1;1;1;1;1;1;1;1;1	58029931;58041436;58043542;58047135;58049363;58053664;58054648;58056214;58057414;58058132;58059035;58059379;58061196;58062132;58063372;58065274;58068270;58068732;58070041;58073178;58076064;58077443;58078426;58081503;58082012;58085434;58092494;58094421;58095155;58096960;58097866;58102585;58104319;58104965;58106028	58030058;58041493;58043638;58047243;58049489;58053725;58054737;58056294;58057558;58058224;58059186;58059472;58061305;58062316;58063534;58065366;58068439;58068846;58070163;58073274;58076188;58077576;58078513;58081589;58082203;58085661;58092589;58094549;58095229;58097012;58097980;58102650;58104507;58105132;58106413	+;+;+;+;+;+;+;+;+;+;+;+;+;+;+;+;+;+;+;+;+;+;+;+;+;+;+;+;+;+;+;+;+;+;+	4423	2	5	2	3	0	0	2	0	5	6	0	8	6	12
ENSMUST00000001036	Tyk2	9;9;9;9;9;9;9;9;9;9;9;9;9;9;9;9;9;9;9;9;9;9;9	21104069;21105264;21107483;21107865;21108774;21109235;21110134;21110452;21111006;21111245;21114193;21115192;21115372;21115644;21115835;21116133;21120260;21120503;21121392;21123977;21124411;21124864;21127124	21105183;21105374;21107600;21108037;21108892;21109427;21110231;21110602;21111160;21111380;21114320;21115279;21115548;21115747;21116030;21116241;21120417;21120703;21121758;21124209;21124558;21124981;21127346	-;-;-;-;-;-;-;-;-;-;-;-;-;-;-;-;-;-;-;-;-;-;-	4619	540	443	639	383	477	514	149	132	759	647	298	569	509	925
ENSMUST00000001040	Icam4	9;9;9	21029373;21029937;21030382	21029823;21030242;21030531	+;+;+	907	0	0	0	0	0	0	0	0	0	0	0	0	0	0
ENSMUST00000001042	Ilf2	3;3;3;3;3;3;3;3;3;3;3;3;3;3	90476201;90477005;90477320;90480604;90480993;90481364;90482777;90484454;90485690;90486185;90486851;90486983;90487227;90487459	90476245;90477064;90477362;90480708;90481070;90481466;90482842;90484570;90485768;90486272;90486912;90487097;90487317;90488379	+;+;+;+;+;+;+;+;+;+;+;+;+;+	1973	1028	989	1244	885	1145	1156	579	599	2244	2066	833	1978	1962	2348
ENSMUST00000001043	Chtop	3;3;3;3;3	90498956;90502116;90503096;90506108;90509191	90500107;90502253;90503282;90507626;90509451	-;-;-;-;-	3257	0	0	0	0	0	0	0	0	0	0	0	0	0	0
ENSMUST00000001046	S100a4	3;3;3	90603770;90604997;90605740	90603806;90605152;90606044	+;+;+	498	0	0	0	0	0	0	0	0	0	0	0	0	0	0
ENSMUST00000001047	S100a3	3;3;3	90600215;90601780;90602191	90600268;90601925;90602702	+;+;+	712	56	35	91	47	54	64	25	24	293	285	137	186	358	424
ENSMUST00000001049	S100a5	3;3	90609810;90611511	90609961;90611780	+;+	422	1	1	0	0	2	2	1	0	1	1	0	1	2	0
ENSMUST00000001051	S100a6	3;3;3	90612894;90613743;90614191	90613226;90613904;90614414	+;+;+	719	123	218	358	151	149	164	56	27	556	558	580	487	591	521
ENSMUST00000001055	Icam2	11;11;11;11	106377656;106378646;106380667;106382430	106377994;106378963;106380939;106382781	-;-;-;-	1282	0	1	5	0	4	0	1	0	6	5	2	7	7	6
ENSMUST00000001059	Ern1	11;11;11;11;11;11;11;11;11;11;11;11;11;11;11;11;11;11;11;11;11;11	106394650;106399772;106400195;106403448;106405722;106407041;106407496;106408060;106408890;106409895;106411623;106414351;106418824;106420019;106421706;106423387;106426813;106429014;106434915;106437090;106458908;106487617	106398754;106399839;106400318;106403575;106405869;106407240;106407595;106408249;106408980;106410162;106411814;106414469;106418989;106420097;106421967;106423488;106426935;106429086;106434987;106437123;106459028;106487796	-;-;-;-;-;-;-;-;-;-;-;-;-;-;-;-;-;-;-;-;-;-	6946	109	113	153	75	114	75	46	24	799	828	546	699	677	766
ENSMUST00000001063	Epn2	11;11;11;11;11;11;11;11;11;11	61517249;61521659;61522406;61523029;61532518;61533571;61534578;61535271;61546150;61579567	61519707;61521874;61522492;61523193;61532692;61533681;61534613;61535383;61546911;61579685	-;-;-;-;-;-;-;-;-;-	4243	0	0	0	0	0	0	0	0	0	0	0	0	0	0
ENSMUST00000001079	Sec24b	3;3;3;3;3;3;3;3;3;3;3;3;3;3;3;3;3;3;3;3;3;3;3;3	129982759;129984167;129987687;129988896;129989649;129990295;129991331;129992975;129993730;129994269;129995914;129996341;129996681;129999512;130002305;130002940;130004994;130007411;130009662;130011792;130020538;130033831;130040674;130060569	129984006;129984270;129987779;129989000;129989786;129990470;129991441;129993148;129993888;129994392;129996120;129996396;129996799;129999624;130002414;130003066;130005096;130007595;130009894;130011872;130020642;130033974;130041447;130060907	-;-;-;-;-;-;-;-;-;-;-;-;-;-;-;-;-;-;-;-;-;-;-;-	5128	37	52	46	35	46	43	17	20	499	532	419	465	484	493
ENSMUST00000001080	N4bp3	11;11;11;11;11	51643063;51644275;51645173;51645927;51650678	51644148;51644529;51645685;51646274;51650842	-;-;-;-;-	2367	25	23	54	10	25	26	11	7	128	114	94	94	98	176
ENSMUST00000001081	Rmnd5b	11;11;11;11;11;11;11;11;11;11	51623673;51624229;51624475;51625669;51626736;51626999;51627622;51627880;51629476;51635590	51624146;51624383;51624577;51625834;51626902;51627099;51627762;51628025;51629661;51635896	-;-;-;-;-;-;-;-;-;-	1946	10	7	7	6	9	11	6	7	31	21	0	23	25	34
ENSMUST00000001083	Nhp2	11;11;11	51619771;51622485;51623092	51620151;51622590;51623429	+;+;+	825	0	0	0	0	0	0	0	0	4	3	0	1	2	3
ENSMUST00000001092	Zfp276	8;8;8;8;8;8;8;8;8;8;8	123254195;123255707;123256284;123256419;123258311;123259431;123264816;123264995;123265314;123267600;123267770	123254923;123256010;123256330;123256865;123258389;123259514;123264926;123265070;123265431;123267699;123269745	+;+;+;+;+;+;+;+;+;+;+	4071	1	0	0	0	0	0	0	0	0	0	0	0	0	0
ENSMUST00000001108	Add1	5;5;5;5;5;5;5;5;5;5;5;5;5;5;5;5	34573863;34601324;34604690;34605828;34610192;34610490;34613288;34613519;34614184;34616563;34619350;34620045;34625279;34628415;34629136;34630470	34573913;34601538;34604852;34605979;34610272;34610639;34613431;34613617;34614360;34616907;34619451;34620134;34625435;34628513;34629172;34632305	+;+;+;+;+;+;+;+;+;+;+;+;+;+;+;+	3898	0	0	0	0	0	0	0	0	0	0	0	0	0	0
ENSMUST00000001109	Mfsd10	5;5;5;5;5;5;5;5;5;5;5;5;5	34633642;34634131;34634293;34634423;34634591;34634851;34635051;34635370;34635609;34636021;34636410;34636594;34636927	34634014;34634220;34634340;34634513;34634699;34634962;34635159;34635531;34635767;34636124;34636506;34636783;34637189	-;-;-;-;-;-;-;-;-;-;-;-;-	1907	0	0	0	0	0	0	0	0	0	0	0	0	0	0
ENSMUST00000001112	Grk4	5;5;5;5;5;5;5;5;5;5;5;5;5;5;5;5	34660379;34669110;34674534;34676110;34694747;34710133;34711698;34716189;34719701;34730005;34731481;34745163;34748179;34751555;34752136;34755144	34661004;34669202;34674646;34676184;34694853;34710225;34711761;34716329;34719891;34730042;34731570;34745371;34748316;34751692;34752267;34755303	+;+;+;+;+;+;+;+;+;+;+;+;+;+;+;+	2408	0	0	0	0	0	0	0	0	0	2	1	1	0	0
ENSMUST00000001115	Grk6	13;13;13;13;13;13;13;13;13;13;13;13;13;13;13;13	55445334;55449308;55450265;55450507;55450928;55451329;55451520;55451703;55452135;55453047;55453172;55454317;55454606;55458793;55459013;55459782	55445560;55449403;55450377;55450584;55451028;55451421;55451583;55451843;55452325;55453084;55453261;55454525;55454743;55458930;55459147;55460925	+;+;+;+;+;+;+;+;+;+;+;+;+;+;+;+	2996	119	124	259	72	95	105	44	46	351	308	78	326	320	413
ENSMUST00000001116	Luzp1	4;4	136540354;136545238	136543518;136549318	+;+	7246	0	0	0	0	0	0	0	0	0	0	0	0	0	0
ENSMUST00000001122	Slc13a2	11;11;11;11;11;11;11;11;11;11;11;11	78397087;78398291;78399032;78400084;78400476;78400744;78403072;78403314;78404378;78404671;78406810;78422066	78397855;78398428;78399193;78400205;78400564;78400962;78403194;78403485;78404577;78404807;78406938;78422217	-;-;-;-;-;-;-;-;-;-;-;-	2412	0	0	7	0	2	1	0	2	10	15	18	12	23	15
ENSMUST00000001125	Kctd10	5;5;5;5;5;5;5	114365622;114367209;114368342;114368941;114370059;114374896;114380426	114365866;114367404;114368394;114369030;114370228;114375109;114380483	-;-;-;-;-;-;-	1026	0	0	0	0	0	0	0	0	0	0	0	0	0	0
ENSMUST00000001126	Slc46a1	11;11;11;11;11	78465697;78466351;78468625;78470695;78471371	78466005;78467203;78468708;78470851;78471945	+;+;+;+;+	1978	24	43	33	29	33	36	15	11	41	24	0	29	19	64
ENSMUST00000001127	Poldip2	11;11;11;11;11;11;11;11;11;11;11	78512193;78513920;78515088;78516819;78517553;78517825;78518073;78518953;78519180;78521152;78521794	78512472;78514001;78515185;78516915;78517628;78517932;78518209;78518979;78519305;78521231;78522736	+;+;+;+;+;+;+;+;+;+;+	2054	167	143	194	124	172	173	57	46	549	503	246	451	488	524
ENSMUST00000001130	Sebox	11;11;11	78503447;78503739;78504023	78503577;78503899;78505081	+;+;+	1351	0	0	0	0	0	0	0	0	0	0	0	0	0	0
ENSMUST00000001147	Col6a1	10;10;10;10;10;10;10;10;10;10;10;10;10;10;10;10;10;10;10;10;10;10;10;10;10;10;10;10;10;10;10;10;10;10;10	76708792;76710346;76710962;76711283;76711575;76712268;76712865;76713185;76713626;76713873;76714114;76714414;76714658;76714995;76715271;76716261;76716719;76717129;76717262;76717400;76717795;76718059;76718373;76718517;76718979;76719125;76719623;76720961;76721088;76721263;76721403;76721816;76723376;76724939;76725820	76710181;76710375;76711139;76711466;76711684;76712401;76712873;76713221;76713661;76713938;76714176;76714449;76714708;76715057;76715333;76716323;76716781;76717164;76717315;76717462;76717857;76718112;76718417;76718543;76719005;76719169;76719676;76721005;76721108;76721283;76721531;76721975;76723576;76725068;76726168	-;-;-;-;-;-;-;-;-;-;-;-;-;-;-;-;-;-;-;-;-;-;-;-;-;-;-;-;-;-;-;-;-;-;-	4100	47	153	142	27	94	93	19	19	279	272	75	223	223	238
ENSMUST00000001148	Pcbp3	10;10;10;10;10;10;10;10;10;10;10;10;10;10;10;10	76761857;76763222;76767864;76770260;76770961;76781832;76785140;76788391;76789738;76797795;76798627;76799529;76800760;76825860;76892557;76961748	76762526;76763391;76767916;76770319;76771039;76781873;76785214;76788519;76789869;76797911;76798659;76799552;76800914;76825992;76892656;76961788	-;-;-;-;-;-;-;-;-;-;-;-;-;-;-;-	2013	0	0	0	0	0	0	0	0	0	0	0	0	0	0
ENSMUST00000001155	Araf	X;X;X;X;X;X;X;X;X;X;X;X;X;X;X;X	20848543;20849927;20850245;20851466;20851658;20851930;20853318;20853560;20853677;20853913;20857612;20857878;20858394;20858742;20859685;20859979	20848619;20850082;20850348;20851568;20851812;20852028;20853459;20853587;20853816;20854115;20857788;20857924;20858512;20858873;20859819;20860519	+;+;+;+;+;+;+;+;+;+;+;+;+;+;+;+	2358	0	0	0	0	0	0	0	0	0	0	0	0	0	0
ENSMUST00000001156	Cfp	X;X;X;X;X;X;X;X;X	20925454;20927281;20927535;20927953;20928328;20928643;20929596;20931152;20931391	20925759;20927392;20927723;20928126;20928519;20928813;20929771;20931302;20931555	-;-;-;-;-;-;-;-;-	1636	51	72	156	44	38	41	20	11	38	51	52	30	36	72
ENSMUST00000001162	Uxt	X;X;X;X;X;X;X	20951929;20952208;20959358;20959735;20959938;20961635;20961934	20952023;20952271;20959465;20959802;20960019;20961786;20962000	-;-;-;-;-;-;-	636	0	0	0	0	0	0	0	0	1	0	0	0	0	0
ENSMUST00000001166	Cnnm3	1;1;1;1;1;1;1;1	36511867;36518952;36520078;36520519;36520819;36521205;36521701;36525166	36513153;36519095;36520227;36520688;36520915;36521338;36521839;36528237	+;+;+;+;+;+;+;+	5193	0	0	0	0	0	0	0	0	0	0	0	0	0	0
ENSMUST00000001171	Lman2l	1;1;1;1;1;1;1	36423186;36424838;36428102;36428300;36439609;36443491;36445050	36424503;36424957;36428216;36428461;36439726;36443609;36445271	-;-;-;-;-;-;-	2174	0	0	0	0	0	0	0	0	0	0	0	0	0	0
ENSMUST00000001172	Ankrd39	1;1;1;1	36538173;36541859;36542762;36547086	36539534;36542062;36542865;36547201	-;-;-;-	1786	242	211	258	129	218	191	79	73	529	372	325	330	415	320
ENSMUST00000001179	Pcnt	10;10;10;10;10;10;10;10;10;10;10;10;10;10;10;10;10;10;10;10;10;10;10;10;10;10;10;10;10;10;10;10;10;10;10;10;10;10;10;10;10;10	76351254;76352909;76354173;76355059;76356164;76357035;76367308;76368731;76369835;76374851;76379905;76380163;76381233;76382020;76384741;76385704;76387427;76388852;76392194;76399856;76401332;76403624;76403758;76404422;76408698;76409468;76411526;76412021;76412498;76418360;76419978;76422768;76426885;76427813;76429200;76433004;76433607;76433985;76436426;76437145;76440143;76442565	76351779;76353036;76354311;76355135;76356396;76357154;76367481;76368833;76370079;76375300;76380055;76380439;76381425;76382187;76384905;76385870;76387529;76389532;76393039;76400026;76401535;76403644;76403874;76404651;76408910;76409630;76411758;76412172;76412649;76418566;76420542;76423225;76426972;76428053;76429311;76433140;76433781;76434040;76436681;76437216;76440355;76442912	-;-;-;-;-;-;-;-;-;-;-;-;-;-;-;-;-;-;-;-;-;-;-;-;-;-;-;-;-;-;-;-;-;-;-;-;-;-;-;-;-;-	9530	241	201	261	141	257	254	72	43	830	603	277	520	496	754
ENSMUST00000001181	Col6a2	10;10;10;10;10;10;10;10;10;10;10;10;10;10;10;10;10;10;10;10;10;10;10;10;10;10;10;10	76595762;76603329;76603462;76604056;76604345;76604849;76605060;76605774;76606172;76606575;76607095;76607727;76608107;76608708;76609257;76609520;76610160;76610650;76611029;76611163;76611416;76611792;76611948;76613255;76614109;76614337;76615046;76623251	76596811;76603367;76603914;76604208;76604390;76604884;76605122;76605836;76606207;76606625;76607157;76607789;76608169;76608770;76609346;76609582;76610222;76610703;76611073;76611189;76611442;76611836;76612001;76613320;76614129;76614935;76615218;76623630	-;-;-;-;-;-;-;-;-;-;-;-;-;-;-;-;-;-;-;-;-;-;-;-;-;-;-;-	3949	6	64	49	5	22	19	4	4	206	260	46	238	231	183
ENSMUST00000001183	Ftcd	10;10;10;10;10;10;10;10;10;10;10;10;10;10	76575648;76576501;76578002;76579783;76579990;76581295;76581503;76583811;76584170;76584532;76587133;76587301;76588070;76589226	76575759;76576684;76578130;76579871;76580169;76581432;76581634;76583872;76584299;76584693;76587176;76587439;76588165;76589561	+;+;+;+;+;+;+;+;+;+;+;+;+;+	1933	0	0	0	0	0	0	0	0	0	0	0	0	0	0
ENSMUST00000001184	Mxd1	6;6;6;6;6;6	86647044;86651442;86653085;86663071;86668538;86668936	86651079;86651601;86653199;86663100;86668634;86669159	-;-;-;-;-;-	4662	528	398	834	369	549	477	155	174	1876	1981	662	1723	1655	2229
ENSMUST00000001185	Gmcl1	6;6;6;6;6;6;6;6;6;6;6;6;6;6	86691768;86697449;86700512;86704499;86707403;86710515;86711589;86714175;86717386;86717992;86721341;86722569;86726073;86732911	86693051;86697536;86700657;86704574;86707472;86710652;86711679;86714259;86717451;86718104;86721438;86722665;86726196;86733378	-;-;-;-;-;-;-;-;-;-;-;-;-;-	2944	469	380	550	370	440	410	265	236	2247	2160	948	1875	1823	2177
ENSMUST00000001186	Snrnp27	6;6;6;6;6;6	86675221;86676222;86680907;86681591;86682856;86684447	86675580;86676286;86680986;86681703;86682976;86684522	-;-;-;-;-;-	815	42	42	56	33	43	47	21	31	192	179	197	172	189	171
ENSMUST00000001187	Anxa4	6;6;6;6;6;6;6;6;6;6;6;6;6	86736840;86741836;86743118;86744625;86748887;86751063;86752153;86753803;86754853;86757819;86760674;86765762;86793509	86737823;86741958;86743176;86744720;86748980;86751119;86752232;86753893;86754966;86757913;86760761;86765807;86793584	-;-;-;-;-;-;-;-;-;-;-;-;-	2003	0	0	0	0	0	0	0	0	0	0	0	0	0	0
ENSMUST00000001202	Ocrl	X;X;X;X;X;X;X;X;X;X;X;X;X;X;X;X;X;X;X;X;X;X;X;X	47912387;47912969;47916475;47920161;47930371;47930898;47931576;47931784;47933374;47934845;47936090;47936301;47938299;47941109;47943506;47947003;47947707;47948125;47956210;47960453;47961377;47962080;47963141;47963460	47912691;47913048;47916554;47920199;47930481;47930984;47931696;47931945;47933475;47934959;47936206;47936488;47938410;47941218;47943641;47947113;47947872;47948360;47956233;47960569;47961461;47962207;47963252;47965868	+;+;+;+;+;+;+;+;+;+;+;+;+;+;+;+;+;+;+;+;+;+;+;+	5253	2	2	1	4	2	4	1	1	25	35	49	27	28	28
ENSMUST00000001204	Calm1	12;12;12;12;12;12	100200144;100202393;100203575;100205613;100206098;100206400	100200305;100202423;100203718;100205719;100206233;100209806	+;+;+;+;+;+	3987	4	13	12	4	8	6	5	2	2	2	0	0	0	1
ENSMUST00000001226	Sh3bp1	15;15;15;15;15;15;15;15;15;15;15;15;15;15;15;15;15;15	78899768;78901146;78901399;78902555;78902854;78903059;78903553;78904270;78904464;78905030;78905771;78906256;78906423;78907214;78907961;78908353;78910008;78911339	78899961;78901188;78901503;78902631;78902965;78903135;78903697;78904338;78904554;78905175;78905882;78906337;78906503;78907330;78908058;78908512;78910099;78912047	+;+;+;+;+;+;+;+;+;+;+;+;+;+;+;+;+;+	2510	0	8	23	1	2	3	0	2	33	27	36	32	48	42
ENSMUST00000001240	Agpat3	10;10;10;10;10;10;10;10;10;10	78269178;78274072;78278010;78282374;78283095;78284189;78284995;78287847;78329276;78352213	78273775;78274270;78278085;78282476;78283248;78284350;78285164;78288073;78329336;78352442	-;-;-;-;-;-;-;-;-;-	5980	1246	934	1259	948	1212	991	451	312	2773	2530	962	2260	2148	2769
ENSMUST00000001242	Gatd3a	10;10;10;10;10;10;10	78162067;78163397;78164838;78167395;78168809;78169373;78169595	78162718;78163553;78164930;78167514;78168922;78169425;78169768	-;-;-;-;-;-;-	1363	629	521	681	451	619	595	297	310	1739	1547	777	1472	1615	1673
ENSMUST00000001247	Rnf32	5;5;5;5;5;5;5;5;5;5	29195997;29196580;29197926;29198574;29203055;29205669;29206174;29206696;29224117;29225043	29196112;29196645;29198020;29198838;29203197;29205701;29206298;29206804;29224284;29225522	+;+;+;+;+;+;+;+;+;+	1600	0	0	0	0	0	0	0	0	0	0	0	0	0	0
ENSMUST00000001253	Slc26a4	12;12;12;12;12;12;12;12;12;12;12;12;12;12;12;12;12;12;12;12;12	31519827;31522442;31525451;31526601;31528619;31529459;31531697;31533145;31535250;31535611;31535836;31539183;31540504;31544226;31544430;31547102;31547846;31549913;31557040;31559160;31559951	31520367;31522525;31525596;31526655;31528849;31529554;31531789;31533214;31535356;31535706;31535913;31539296;31540651;31544308;31544582;31547266;31548030;31550023;31557179;31559519;31559969	-;-;-;-;-;-;-;-;-;-;-;-;-;-;-;-;-;-;-;-;-	3075	0	10	6	14	8	28	4	3	87	41	21	54	46	32
ENSMUST00000001254	Slc26a3	12;12;12;12;12;12;12;12;12;12;12;12;12;12;12;12;12;12;12;12;12	31438219;31447010;31447730;31448731;31449078;31450815;31452496;31453865;31456998;31457241;31457460;31461708;31463467;31464676;31464837;31465759;31466397;31468521;31470840;31471088;31473472	31438341;31447229;31447869;31448841;31449244;31450979;31452648;31453947;31457145;31457354;31457537;31461803;31463573;31464745;31464929;31465854;31466630;31468575;31470982;31471153;31473917	+;+;+;+;+;+;+;+;+;+;+;+;+;+;+;+;+;+;+;+;+	2908	0	0	0	0	0	0	0	0	2	0	0	0	1	2
ENSMUST00000001256	Sema6b	17;17;17;17;17;17;17;17;17;17;17;17;17;17;17;17;17	56123085;56125333;56125517;56126217;56126450;56126940;56127478;56128250;56129408;56129973;56130706;56131113;56131523;56131743;56132498;56132716;56140214	56124917;56125391;56125594;56126366;56126632;56127089;56127609;56128467;56129496;56130092;56130796;56131214;56131585;56131803;56132621;56132868;56140343	-;-;-;-;-;-;-;-;-;-;-;-;-;-;-;-;-	3736	0	0	0	0	0	0	0	0	0	0	0	0	0	0
ENSMUST00000001258	Uhrf1	17;17;17;17;17;17;17;17;17;17;17;17;17;17;17;17;17	56303321;56305086;56309337;56310676;56312054;56312864;56313041;56315192;56315399;56315777;56317004;56317991;56318247;56320162;56320397;56322021;56322356	56303561;56305250;56309579;56310836;56312269;56312967;56313251;56315315;56315506;56315881;56317110;56318150;56318384;56320282;56320542;56322125;56323486	+;+;+;+;+;+;+;+;+;+;+;+;+;+;+;+;+	3586	0	0	0	0	0	0	0	0	0	0	0	0	0	0
ENSMUST00000001279	Lsr	7;7;7;7;7;7;7;7;7;7	30957775;30957989;30958750;30958975;30959153;30962098;30962811;30965969;30971868;30973080	30957901;30958620;30958881;30959034;30959314;30962244;30962867;30966088;30972212;30973464	-;-;-;-;-;-;-;-;-;-	2167	13	5	10	4	7	5	3	2	40	38	1	35	26	35
ENSMUST00000001280	Gramd1a	7;7;7;7;7;7;7;7;7;7;7;7;7;7;7;7;7;7;7	31130127;31132541;31132758;31133991;31134158;31134414;31135597;31135823;31138114;31138752;31139397;31139757;31141130;31142368;31142551;31142804;31143547;31143657;31150896	31130584;31132661;31132865;31134078;31134331;31134517;31135739;31135941;31138257;31138950;31139547;31139869;31141210;31142463;31142654;31142888;31143567;31143873;31151050	-;-;-;-;-;-;-;-;-;-;-;-;-;-;-;-;-;-;-	2681	0	0	0	0	0	0	0	0	0	0	0	0	0	0
ENSMUST00000001284	Usf1	1;1;1;1;1;1;1;1;1;1	171411313;171414437;171415505;171415715;171416135;171416810;171417242;171417473;171417641;171418032	171411440;171414529;171415554;171415799;171416236;171417005;171417329;171417531;171417864;171418121	+;+;+;+;+;+;+;+;+;+	1115	0	0	0	0	0	0	0	0	0	0	0	0	0	0
ENSMUST00000001304	Ckb	12;12;12;12;12;12;12;12	111669355;111669825;111670162;111670873;111671215;111671425;111671766;111672230	111669741;111670014;111670285;111671044;111671347;111671579;111671973;111672338	-;-;-;-;-;-;-;-	1478	2517	2377	2477	2289	2472	2497	2187	2129	2527	2470	1244	2470	2473	2550
ENSMUST00000001319	Efnb2	8;8;8;8;8	8617434;8622331;8623148;8639206;8660484	8620976;8622444;8623240;8639489;8660773	-;-;-;-;-	4324	2	43	75	46	14	11	8	10	431	529	268	497	452	575
ENSMUST00000001326	Sp1	15;15;15;15;15;15	102406380;102407772;102408216;102425631;102429957;102430725	102406422;102407932;102409719;102425796;102430156;102436404	+;+;+;+;+;+	7754	360	323	462	274	347	318	174	138	1822	1702	443	1530	1448	2108
ENSMUST00000001327	Itgb7	15;15;15;15;15;15;15;15;15;15;15;15;15;15;15	102215995;102216472;102216892;102217247;102217774;102218497;102219174;102222089;102222342;102222641;102223331;102224302;102224558;102227398;102231851	102216267;102216632;102217097;102217466;102217997;102218690;102219320;102222178;102222437;102222799;102223572;102224472;102224759;102227601;102231935	-;-;-;-;-;-;-;-;-;-;-;-;-;-;-	2674	26	66	189	23	16	13	7	0	54	65	63	72	66	89
ENSMUST00000001331	Myg1	15;15;15;15;15;15	102331750;102332090;102334202;102337101;102337329;102337636	102331953;102332202;102334361;102337223;102337510;102337834	+;+;+;+;+;+	981	0	0	0	0	0	0	0	0	0	0	0	0	0	0
ENSMUST00000001335	Pfdn5	15;15;15;15;15	102326189;102326433;102328522;102328712;102331273	102326260;102326535;102328596;102328817;102331486	+;+;+;+;+	570	0	0	0	0	0	0	0	0	0	0	0	0	0	0
ENSMUST00000001339	Rrp15	1;1;1;1;1	186720978;186736116;186737588;186739604;186749164	186721546;186736314;186737685;186739863;186749358	-;-;-;-;-	1321	0	0	0	0	0	0	0	0	0	0	0	0	1	3
ENSMUST00000001347	Rnd2	11;11;11;11;11	101468175;101468933;101470013;101470718;101471058	101468439;101469020;101470122;101470852;101471853	+;+;+;+;+	1394	14	8	10	8	7	9	4	5	38	32	0	30	14	38
ENSMUST00000001384	Cnn1	9;9;9;9;9;9;9	22099281;22101141;22104306;22105370;22105670;22107751;22107986	22099418;22101262;22104372;22105507;22105780;22107897;22109630	+;+;+;+;+;+;+	2368	7	14	21	2	15	12	0	6	97	131	87	76	97	83
ENSMUST00000001402	Fbxo9	9;9;9;9;9;9;9;9;9;9;9;9;9	78081502;78084503;78085907;78086275;78087174;78087470;78095145;78095868;78098346;78099788;78101528;78104271;78109002	78082088;78084654;78086000;78086370;78087264;78087588;78095259;78095998;78098445;78099845;78101686;78104354;78109065	-;-;-;-;-;-;-;-;-;-;-;-;-	1850	0	0	1	0	1	1	0	0	0	0	0	0	0	0
ENSMUST00000001412	Vps50	6;6;6;6;6;6;6;6;6;6;6;6;6;6;6;6;6;6;6;6;6;6;6;6;6;6;6;6	3498382;3504869;3516622;3517789;3519217;3520207;3522256;3522683;3524093;3532158;3533472;3536832;3545510;3551013;3554996;3555368;3562268;3565516;3567735;3571002;3578794;3588006;3592427;3594018;3594743;3598472;3600128;3602660	3498555;3504937;3516744;3517860;3519270;3520277;3522373;3522718;3524175;3532200;3533570;3536972;3545642;3551104;3555090;3555466;3562358;3565692;3567853;3571108;3578915;3588086;3592575;3594114;3594901;3598593;3600317;3603315	+;+;+;+;+;+;+;+;+;+;+;+;+;+;+;+;+;+;+;+;+;+;+;+;+;+;+;+	3572	0	0	0	0	0	0	0	0	0	0	0	0	0	0
ENSMUST00000001415	Apbb3	18;18;18;18;18;18;18;18;18;18;18;18;18	36671160;36674950;36675281;36675663;36676171;36676363;36676617;36676865;36677110;36677445;36678394;36678550;36678997	36671675;36675141;36675396;36675746;36676255;36676477;36676622;36676992;36677256;36677505;36678470;36678713;36679366	-;-;-;-;-;-;-;-;-;-;-;-;-	2061	427	381	446	289	417	450	164	159	1249	1102	444	1075	1126	1276
ENSMUST00000001416	Hars	18;18;18;18;18;18;18;18;18;18;18;18;18	36766530;36767190;36768087;36770082;36770417;36770805;36771096;36771328;36772258;36773520;36776177;36782680;36783011	36766953;36767336;36768203;36770324;36770544;36770898;36771194;36771435;36772383;36773615;36776296;36782769;36783205	-;-;-;-;-;-;-;-;-;-;-;-;-	1987	709	599	789	524	766	695	342	341	2281	2162	547	2071	2089	2242
ENSMUST00000001419	Zmat2	18;18;18;18;18;18	36793923;36794297;36795041;36796037;36796499;36797879	36793959;36794390;36795164;36796110;36796644;36799660	+;+;+;+;+;+	2257	905	801	1026	694	875	914	476	494	2781	2741	2074	2541	2795	2722
ENSMUST00000001439	Ube2c	2;2;2;2;2;2	164769903;164770367;164771293;164771854;164772167;164777190	164770080;164770394;164771379;164772058;164772226;164778822	+;+;+;+;+;+	2191	0	1	2	0	0	0	0	0	2	0	0	1	1	0
ENSMUST00000001451	Smg5	3;3;3;3;3;3;3;3;3;3;3;3;3;3;3;3;3;3;3;3;3;3	88336260;88341858;88342441;88342880;88345363;88346445;88347518;88349142;88349376;88350016;88350697;88350979;88352963;88353876;88354532;88355578;88358653;88359027;88359548;88360331;88360754;88361025	88336497;88341956;88342564;88343036;88345452;88346534;88347596;88349267;88349444;88350224;88350834;88351581;88353138;88353951;88354707;88355736;88358712;88359186;88359638;88360405;88360892;88362337	+;+;+;+;+;+;+;+;+;+;+;+;+;+;+;+;+;+;+;+;+;+	4447	2920	2346	2771	2053	2565	2466	1015	1024	2959	2451	713	2143	2088	2848
ENSMUST00000001452	Cct3	3;3;3;3;3;3;3;3;3;3;3;3;3;3	88297116;88299342;88300800;88300929;88302768;88305013;88309161;88311673;88313242;88313556;88318346;88320460;88321014;88321444	88297266;88299403;88300850;88300991;88302864;88305130;88309347;88311822;88313374;88313637;88318526;88320705;88321145;88321767	+;+;+;+;+;+;+;+;+;+;+;+;+;+	1977	0	0	0	0	0	0	0	0	0	0	0	0	0	0
ENSMUST00000001454	Glmp	3;3;3;3;3	88325082;88325677;88326411;88327857;88328203	88325201;88325931;88326629;88328113;88328368	+;+;+;+;+	1017	0	0	0	0	0	0	0	0	0	0	0	0	0	0
ENSMUST00000001455	Mef2d	3;3;3;3;3;3;3;3;3;3;3	88142372;88155678;88156322;88158034;88159122;88159536;88161191;88162958;88167515;88168038;88168632	88142674;88155862;88156525;88158171;88159332;88159592;88161381;88163087;88167734;88168344;88172086	+;+;+;+;+;+;+;+;+;+;+	5401	343	283	389	288	327	263	70	61	1140	1146	28	897	902	1465
ENSMUST00000001456	Tmem79	3;3;3;3	88328655;88332440;88332892;88334382	88329932;88332653;88333682;88334504	-;-;-;-	2406	5	0	1	2	5	3	0	0	16	14	29	9	17	12
ENSMUST00000001460	Snd1	6;6;6;6;6;6;6;6;6;6;6;6;6;6;6;6;6;6;6;6;6;6;6;6	28480348;28512835;28520145;28523727;28526053;28526909;28527577;28528913;28531409;28545485;28626100;28668558;28707034;28724909;28745185;28795829;28874861;28880197;28883258;28884188;28884956;28886414;28888079;28888235	28480642;28512984;28520265;28523805;28526213;28527000;28527735;28529019;28531499;28545598;28626189;28668658;28707144;28724981;28745326;28795938;28875049;28880338;28883381;28884257;28885069;28886617;28888123;28888832	+;+;+;+;+;+;+;+;+;+;+;+;+;+;+;+;+;+;+;+;+;+;+;+	3482	57	63	112	64	77	65	28	31	560	559	316	454	548	477
ENSMUST00000001479	Kpnb1	11;11;11;11;11;11;11;11;11;11;11;11;11;11;11;11;11;11;11;11;11;11	97159714;97163353;97163914;97164725;97164953;97165376;97166047;97167550;97168865;97169148;97169902;97171522;97173053;97175749;97177246;97178270;97178868;97180444;97181625;97184927;97187389;97187546	97162681;97163514;97164028;97164830;97165096;97165483;97166129;97167694;97168936;97169295;97170032;97171713;97173277;97175850;97177356;97178359;97178927;97180596;97181825;97185109;97187447;97187881	-;-;-;-;-;-;-;-;-;-;-;-;-;-;-;-;-;-;-;-;-;-	5894	1290	1242	1516	1071	1280	1148	476	509	3211	3011	908	2920	2817	3499
ENSMUST00000001480	Npepps	11;11;11;11;11;11;11;11;11;11;11;11;11;11;11;11;11;11;11;11;11;11;11	97205844;97212280;97213032;97213771;97217791;97218508;97222951;97224659;97226729;97229830;97231889;97235055;97236065;97238094;97240929;97241804;97241951;97242603;97244428;97248202;97258274;97267595;97280201	97207268;97212327;97213187;97213878;97217847;97218650;97223170;97224793;97226868;97229893;97231998;97235115;97236169;97238258;97241043;97241837;97242047;97242803;97244535;97248323;97258351;97267679;97280638	-;-;-;-;-;-;-;-;-;-;-;-;-;-;-;-;-;-;-;-;-;-;-	4215	158	188	234	127	176	164	69	58	1029	1016	280	937	945	1054
ENSMUST00000001484	Tbx21	11;11;11;11;11;11	97098071;97099770;97099927;97101479;97101944;97114650	97099378;97099831;97100085;97101600;97102098;97115331	-;-;-;-;-;-	2488	0	4	9	0	0	1	0	1	5	1	4	2	3	3
ENSMUST00000001485	Mrpl10	11;11;11;11;11	97041560;97044528;97047030;97047413;97048079	97041652;97044697;97047194;97047557;97049213	+;+;+;+;+	1708	98	89	123	73	99	101	32	43	407	380	237	341	358	425
ENSMUST00000001497	Cideb	14;14;14;14;14	55754045;55754711;55755125;55757842;55758252	55754571;55754901;55755271;55757986;55758458	-;-;-;-;-	1217	0	0	0	0	0	0	0	0	2	4	0	0	3	1
ENSMUST00000001507	Cyp51	5;5;5;5;5;5;5;5;5;5	4081145;4086460;4087778;4091845;4092388;4099124;4100145;4101178;4102928;4104134	4083303;4086628;4087873;4092040;4092507;4099298;4100271;4101354;4103026;4104746	-;-;-;-;-;-;-;-;-;-	3931	237	282	329	182	203	227	103	112	1668	1763	1608	1318	1591	1615
ENSMUST00000001513	Tubb6	18;18;18;18	67390717;67391325;67392946;67401310	67390814;67391433;67393056;67402748	+;+;+;+	1757	31	43	50	82	16	24	21	9	133	105	55	119	112	162
ENSMUST00000001520	Afg3l1	8;8;8;8;8;8;8;8;8;8;8;8;8;8;8;8;8	123477903;123480349;123481071;123484603;123485889;123487359;123488201;123489755;123492541;123492875;123493828;123494806;123498588;123499992;123501233;123501515;123501848	123478047;123480436;123481145;123484688;123486038;123487427;123488325;123490025;123492678;123493028;123493935;123494931;123498698;123500107;123501433;123501709;123503916	+;+;+;+;+;+;+;+;+;+;+;+;+;+;+;+;+	4227	12	8	9	4	9	4	6	1	52	40	3	37	31	52
ENSMUST00000001522	Def8	8;8;8;8;8;8;8;8;8;8;8;8;8	123442986;123446098;123447788;123449301;123452745;123454229;123455414;123456406;123456671;123458351;123459517;123459817;123461464	123443051;123446184;123447912;123449398;123452894;123454370;123455578;123456533;123456784;123458431;123459657;123459926;123463270	+;+;+;+;+;+;+;+;+;+;+;+;+	3214	0	0	0	0	0	0	0	0	0	0	0	0	0	0
ENSMUST00000001534	Sost	11;11	101962458;101966760	101964267;101967015	-;-	2066	0	0	0	0	0	0	0	0	2	7	26	7	10	6
ENSMUST00000001536	Nkx2-1	12;12;12	56531958;56534688;56536309	56533780;56535073;56536908	-;-;-	2809	0	0	1	0	0	0	0	0	0	0	0	0	0	0
ENSMUST00000001538	Pax9	12;12;12;12	56695639;56696574;56700012;56709653	56695864;56697200;56700154;56712822	+;+;+;+	4166	0	0	0	0	0	0	0	0	2	5	0	7	1	2
ENSMUST00000001544	Vwa5a	9;9;9;9;9;9;9;9;9;9;9;9;9;9;9;9;9;9;9;9	38718268;38719258;38722373;38722546;38723027;38723367;38723846;38726943;38727754;38727994;38728622;38733865;38734697;38735559;38735952;38737743;38737903;38738486;38741098;38741694	38718387;38719333;38722430;38722748;38723249;38723542;38723960;38727112;38727842;38728138;38728701;38733979;38734861;38735659;38736205;38737808;38738001;38738616;38741224;38743337	+;+;+;+;+;+;+;+;+;+;+;+;+;+;+;+;+;+;+;+	4157	1	1	2	0	1	0	2	0	12	26	115	18	24	28
ENSMUST00000001547	Col1a1	11;11;11;11;11;11;11;11;11;11;11;11;11;11;11;11;11;11;11;11;11;11;11;11;11;11;11;11;11;11;11;11;11;11;11;11;11;11;11;11;11;11;11;11;11;11;11;11;11;11;11	94936224;94937910;94938227;94938378;94938504;94939391;94939697;94939904;94940118;94940545;94940718;94941102;94941237;94941380;94941547;94941728;94942016;94942204;94942342;94942560;94942795;94943006;94943343;94943590;94943733;94944355;94944598;94944752;94944914;94945368;94945500;94945811;94946275;94946574;94946776;94947074;94947270;94947434;94947618;94947883;94948332;94948543;94948706;94949181;949…	94936444;94938104;94938258;94938413;94938605;94939459;94939741;94939957;94940171;94940598;94940771;94941155;94941281;94941433;94941591;94941781;94942114;94942248;94942440;94942613;94942902;94943059;94943441;94943643;94943831;94944408;94944651;94944805;94944967;94945412;94945598;94945918;94946382;94946627;94946829;94947181;94947323;94947487;94947779;94947990;94948439;94948596;94948813;94949234;949…	+;+;+;+;+;+;+;+;+;+;+;+;+;+;+;+;+;+;+;+;+;+;+;+;+;+;+;+;+;+;+;+;+;+;+;+;+;+;+;+;+;+;+;+;+;+;+;+;+;+;+	5930	339	1567	1684	306	897	820	305	261	2745	2764	2151	2356	2433	3511
ENSMUST00000001548	Itga3	11;11;11;11;11;11;11;11;11;11;11;11;11;11;11;11;11;11;11;11;11;11;11;11;11;11	95044474;95046449;95046921;95051452;95052444;95053225;95053732;95054075;95055696;95055857;95056441;95056704;95057084;95057271;95057967;95058212;95059324;95059556;95059779;95061878;95062553;95063135;95065763;95068225;95068712;95076131	95045763;95046590;95047046;95051550;95052557;95053347;95053914;95054177;95055773;95055936;95056512;95056851;95057181;95057420;95058103;95058279;95059410;95059692;95059867;95062074;95062763;95063221;95066012;95068304;95068839;95076714	-;-;-;-;-;-;-;-;-;-;-;-;-;-;-;-;-;-;-;-;-;-;-;-;-;-	4861	0	0	0	0	0	0	0	0	0	0	0	0	0	1
ENSMUST00000001559	Itfg2	6;6;6;6;6;6;6;6;6;6;6;6	128409444;128410493;128411565;128412699;128412957;128413103;128413525;128414145;128415896;128416257;128417617;128424718	128410417;128410666;128411682;128412790;128413010;128413200;128413673;128414284;128416064;128416298;128417712;128424931	-;-;-;-;-;-;-;-;-;-;-;-	2320	1	1	0	0	1	1	0	0	23	21	16	17	18	22
ENSMUST00000001561	Nrip2	6;6;6;6;6;6	128399766;128404935;128406490;128407354;128407686;128407984	128400301;128405084;128406572;128407475;128407738;128408932	+;+;+;+;+;+	1893	1	1	1	0	1	0	0	1	1	0	0	0	1	1
ENSMUST00000001562	Tulp3	6;6;6;6;6;6;6;6;6;6;6	128321140;128323998;128324980;128325877;128326772;128327540;128327956;128333833;128334438;128337734;128355738	128323212;128324169;128325078;128325991;128326884;128327737;128328077;128334009;128334597;128337785;128355851	-;-;-;-;-;-;-;-;-;-;-	3395	886	746	1012	809	942	907	343	305	2034	1894	534	1705	1592	2197
ENSMUST00000001565	Gtf2h4	17;17;17;17;17;17;17;17;17;17;17;17;17;17	35667730;35668428;35668610;35669309;35669629;35669948;35670190;35670365;35670657;35670866;35671226;35671993;35672686;35673556	35668002;35668506;35668657;35669439;35669761;35670031;35670258;35670476;35670745;35670962;35671357;35672097;35672828;35673739	-;-;-;-;-;-;-;-;-;-;-;-;-;-	1679	0	0	1	0	0	0	0	0	1	0	0	0	0	0
ENSMUST00000001566	Tubb5	17;17;17;17	35833921;35836163;35836628;35837997	35836039;35836273;35836736;35838306	-;-;-;-	2649	717	916	1153	716	702	763	494	648	1708	1736	1011	1706	1715	1738
ENSMUST00000001569	Flot1	17;17;17;17;17;17;17;17;17;17;17;17;17	35823230;35823807;35824127;35824279;35824566;35824833;35825431;35825738;35829843;35830119;35830654;35830943;35832507	35823501;35823863;35824202;35824369;35824709;35824952;35825526;35825890;35830024;35830164;35830791;35831107;35832791	+;+;+;+;+;+;+;+;+;+;+;+;+	1825	13	11	20	12	16	10	7	7	118	112	136	102	111	91
ENSMUST00000001583	Ell2	13;13;13;13;13;13;13;13;13;13;13;13	75707484;75724953;75746292;75749925;75756275;75761878;75762145;75763548;75766154;75769539;75770546;75770680	75707797;75725000;75746413;75750088;75756534;75762002;75762229;75764115;75766220;75769710;75770590;75772356	+;+;+;+;+;+;+;+;+;+;+;+	3647	551	455	560	380	455	388	188	252	1894	1928	720	1612	1498	1779
ENSMUST00000001592	Jup	11;11;11;11;11;11;11;11;11;11;11;11;11;11	100370619;100372296;100372656;100374078;100374326;100376723;100378089;100379522;100380544;100381676;100383007;100383395;100386173;100397636	100371449;100372461;100372695;100374199;100374476;100376998;100378427;100379625;100380688;100381877;100383245;100383654;100386388;100397749	-;-;-;-;-;-;-;-;-;-;-;-;-;-	3205	0	0	0	0	0	0	0	0	0	0	1	1	0	0
ENSMUST00000001595	Fkbp10	11;11;11;11;11;11;11;11;11;11	100415697;100420400;100420891;100421194;100421644;100421944;100422626;100423085;100423436;100423888	100416025;100420545;100421080;100421339;100421833;100422089;100422818;100423227;100423599;100424824	+;+;+;+;+;+;+;+;+;+	2584	2	11	20	2	1	5	2	0	114	113	344	121	160	109
ENSMUST00000001599	Klhl10	11;11;11;11;11	100441917;100445383;100447121;100456284;100456572	100442224;100445872;100447738;100456433;100457022	+;+;+;+;+	2017	0	5	7	2	6	2	0	9	29	27	13	16	18	13
ENSMUST00000001608	Mnx1	5;5;5	29473261;29474756;29477580	29474231;29474911;29478470	-;-;-	2018	0	0	0	0	0	0	0	0	0	0	0	0	0	0
ENSMUST00000001611	Nom1	5;5;5;5;5;5;5;5;5;5;5	29434664;29435930;29437597;29439826;29441331;29442494;29443350;29446239;29446814;29449582;29451029	29435643;29436057;29437792;29440149;29441441;29442661;29443471;29446371;29446945;29449691;29453506	+;+;+;+;+;+;+;+;+;+;+	4882	252	231	263	162	250	230	94	70	977	879	287	772	810	1115
ENSMUST00000001619	Ergic1	17;17;17;17;17;17;17;17;17;17;17	26561545;26605464;26608593;26614356;26624590;26629555;26634417;26635986;26638743;26641582;26655067	26561632;26605584;26608654;26614428;26624684;26629679;26634521;26636046;26638843;26641704;26655174	+;+;+;+;+;+;+;+;+;+;+	1062	0	0	0	0	0	0	0	0	0	0	0	0	0	1
ENSMUST00000001620	Fxr1	3;3;3;3;3;3;3;3;3;3;3;3;3;3;3;3;3	34020079;34039527;34041063;34046032;34046437;34046966;34047632;34049153;34050075;34054222;34056330;34058024;34061828;34064119;34064974;34068161;34068917	34020163;34039579;34041156;34046103;34046585;34047059;34047748;34049323;34050153;34054331;34056416;34058231;34062031;34064319;34065054;34068252;34069342	+;+;+;+;+;+;+;+;+;+;+;+;+;+;+;+;+	2323	11	8	11	14	13	16	8	2	91	108	1	94	92	115
ENSMUST00000001626	Tnk1	11;11;11;11;11;11;11;11;11;11;11;11;11;11	69851005;69851798;69851975;69852813;69853117;69853581;69854958;69855520;69855911;69856378;69856693;69856912;69858405;69858707	69851715;69851893;69852285;69852892;69853281;69853675;69855231;69855803;69856066;69856569;69856763;69857125;69858509;69858730	-;-;-;-;-;-;-;-;-;-;-;-;-;-	2778	0	0	0	0	0	0	0	0	0	0	0	0	0	0
ENSMUST00000001631	Acap1	11;11;11;11;11;11;11;11;11;11;11;11;11;11;11;11;11;11;11;11;11;11	69881567;69881982;69882382;69882585;69883584;69884322;69884586;69884796;69885393;69885693;69886968;69887156;69889237;69889436;69889618;69889820;69889999;69890434;69890589;69890864;69894600;69895286	69881725;69882031;69882492;69882694;69883756;69884491;69884680;69884865;69885604;69885816;69887068;69887207;69889346;69889510;69889713;69889864;69890182;69890492;69890642;69890983;69894657;69895539	-;-;-;-;-;-;-;-;-;-;-;-;-;-;-;-;-;-;-;-;-;-	2482	9	12	45	8	5	8	3	0	22	17	6	10	7	14
ENSMUST00000001652	Bdkrb2	12;12;12	105563172;105588197;105591573	105563248;105588300;105593071	+;+;+	1680	0	0	2	0	0	0	0	0	0	0	0	0	0	0
ENSMUST00000001667	Csn3	5;5;5;5;5	87925579;87927572;87928270;87929724;87932359	87925678;87927633;87928299;87930215;87932665	+;+;+;+;+	991	0	0	0	0	0	0	0	0	0	4	1	1	1	2
ENSMUST00000001672	Ifrd1	12;12;12;12;12;12;12;12;12;12;12;12	40201567;40203919;40204297;40206989;40212310;40212939;40213209;40213978;40216190;40217158;40217378;40222869	40203451;40204014;40204425;40207123;40212418;40213117;40213259;40214135;40216314;40217242;40217482;40223189	-;-;-;-;-;-;-;-;-;-;-;-	3378	7	0	12	3	6	11	3	0	94	76	18	61	72	71
ENSMUST00000001675	Stk38l	6;6;6;6;6;6;6;6;6;6;6;6;6;6	146724995;146758461;146760121;146766195;146766738;146767419;146768333;146768834;146769095;146771582;146772098;146773318;146775400;146775594	146725047;146758605;146760172;146766317;146766821;146767542;146768487;146768936;146769156;146771699;146772221;146773413;146775491;146778812	+;+;+;+;+;+;+;+;+;+;+;+;+;+	4550	367	350	470	339	347	291	218	135	1973	2272	785	1733	1845	2633
ENSMUST00000001699	Hoxc10	15;15	102966796;102970798	102967608;102971893	+;+	1909	0	0	0	42	0	0	0	0	0	0	0	0	0	0
ENSMUST00000001700	Hoxc13	15;15	102921103;102927169	102921917;102928814	+;+	2461	0	0	0	6	0	0	0	0	0	0	0	0	0	0
ENSMUST00000001701	Hoxc11	15;15	102954427;102956469	102955207;102957708	+;+	2021	0	0	0	0	0	0	0	0	0	0	0	0	0	0
ENSMUST00000001703	Hoxc8	15;15	102990607;102992563	102991215;102993821	+;+	1868	0	0	0	2	0	0	0	0	0	0	0	0	0	0
ENSMUST00000001706	Hoxc9	15;15;15	102977032;102981092;102983895	102977101;102982190;102985099	+;+;+	2374	2	0	0	3	0	0	0	0	0	1	0	0	2	1
ENSMUST00000001709	Hoxc5	15;15	103013815;103015228	103014535;103017429	+;+	2923	0	0	0	0	0	0	0	0	0	0	0	1	0	0
ENSMUST00000001711	Hoxc6	15;15	103009573;103010734	103010005;103011881	+;+	1581	0	0	0	2	0	0	0	0	0	0	0	0	0	0
ENSMUST00000001712	Cabin1	10;10;10;10;10;10;10;10;10;10;10;10;10;10;10;10;10;10;10;10;10;10;10;10;10;10;10;10;10;10;10;10;10;10;10;10;10	75646110;75646875;75648057;75652875;75655366;75656775;75657796;75658634;75684292;75694715;75699913;75713453;75715599;75717438;75721278;75725259;75725549;75726858;75732400;75733620;75734966;75737321;75738211;75739326;75740020;75742245;75743202;75745229;75746488;75747826;75750044;75751436;75753377;75754251;75754812;75755369;75764025	75646687;75647101;75648221;75653142;75655440;75657452;75657892;75658797;75684405;75695046;75700095;75713631;75715750;75717698;75721539;75725404;75725755;75727019;75732515;75733776;75735208;75737515;75738363;75739513;75740098;75742462;75743338;75745397;75746774;75747975;75750173;75751616;75753511;75754364;75754904;75755500;75764357	-;-;-;-;-;-;-;-;-;-;-;-;-;-;-;-;-;-;-;-;-;-;-;-;-;-;-;-;-;-;-;-;-;-;-;-;-	7460	1273	1097	1346	825	1115	1083	360	302	1285	1045	330	899	886	1369
ENSMUST00000001713	Gstt1	10;10;10;10;10	75783813;75786795;75794077;75797043;75798385	75784233;75786971;75794227;75797130;75798584	-;-;-;-;-	1037	5	6	19	3	4	4	1	1	33	37	34	33	41	47
ENSMUST00000001715	Gstt3	10;10;10;10;10	75774115;75775871;75776744;75778101;75780847	75775010;75776047;75776894;75778188;75781414	-;-;-;-;-	1880	8	36	63	43	15	17	3	5	305	316	252	337	422	351
ENSMUST00000001716	Ddt	10;10;10	75771233;75772738;75773216	75771506;75772913;75773414	-;-;-	649	67	64	83	47	68	69	32	57	165	126	1	135	131	156
ENSMUST00000001720	Tat	8;8;8;8;8;8;8;8;8;8;8;8	109990437;109991473;109991843;109992583;109993822;109994561;109995169;109996067;109996794;109997522;109998297;109998749	109990520;109991719;109991947;109992650;109993980;109994699;109995221;109996219;109996922;109997605;109998395;109999803	+;+;+;+;+;+;+;+;+;+;+;+	2375	0	2	10	1	2	4	2	0	0	0	1	0	0	0
ENSMUST00000001722	Marveld3	8;8;8	109947914;109959713;109961716	109948662;109959840;109962168	-;-;-	1330	1	10	15	9	2	3	3	0	21	30	35	17	33	30
ENSMUST00000001724	Ddx18	1;1;1;1;1;1;1;1;1;1;1;1;1	121553835;121555216;121555691;121557405;121558411;121559166;121560132;121561281;121561690;121562059;121564493;121565881;121567791	121554138;121555393;121555747;121557518;121558563;121559327;121560271;121561595;121561790;121562194;121564603;121566168;121567989	-;-;-;-;-;-;-;-;-;-;-;-;-	2258	106	96	146	93	87	109	52	46	152	109	55	103	98	221
ENSMUST00000001757	Eef1e1	13;13;13;13	38645698;38654996;38656040;38658907	38646310;38655091;38656240;38659028	-;-;-;-	1032	186	148	225	115	190	162	91	105	646	624	211	530	660	752
ENSMUST00000001780	Akt1	12;12;12;12;12;12;12;12;12;12;12;12;12;12	112653821;112655127;112656502;112656777;112657068;112657268;112657667;112658398;112658546;112659129;112659550;112662180;112671516;112674000	112654777;112655229;112656589;112656991;112657196;112657393;112657735;112658463;112658677;112659276;112659661;112662308;112671654;112674276	-;-;-;-;-;-;-;-;-;-;-;-;-;-	2690	430	373	550	329	376	371	166	190	1040	983	179	878	927	999
ENSMUST00000001790	Cldn15	5;5;5;5;5	136967869;136972320;136974441;136974610;136974814	136968323;136972484;136974522;136974726;136975844	+;+;+;+;+	1850	0	0	0	0	0	0	0	0	0	0	0	0	0	0
ENSMUST00000001792	Il16	7;7;7;7;7;7;7;7;7;7;7;7;7;7;7;7;7;7;7	83643064;83645828;83646302;83648715;83650881;83651879;83655279;83660798;83663064;83666876;83670092;83673034;83674486;83677987;83680625;83682816;83688085;83722285;83735398	83644076;83645950;83646560;83648816;83651049;83652962;83655423;83661285;83663151;83667008;83670209;83673250;83674559;83678101;83680735;83682949;83688193;83722697;83735523	-;-;-;-;-;-;-;-;-;-;-;-;-;-;-;-;-;-;-	5021	0	0	0	0	0	0	0	0	0	0	0	0	0	0
ENSMUST00000001801	Tcirg1	19;19;19;19;19;19;19;19;19;19;19;19;19;19;19;19;19;19;19;19	3896050;3896270;3896604;3896795;3897038;3897468;3897758;3898548;3898718;3898980;3901891;3902344;3902631;3902882;3903046;3903340;3903509;3904217;3904585;3907019	3896192;3896447;3896721;3896902;3897169;3897681;3897876;3898638;3898875;3899119;3902035;3902556;3902724;3902964;3903172;3903428;3903729;3904295;3904705;3907133	-;-;-;-;-;-;-;-;-;-;-;-;-;-;-;-;-;-;-;-	2688	0	0	0	0	0	0	0	0	0	0	0	0	0	0
ENSMUST00000001802	Naglu	11;11;11;11;11;11	101070012;101071080;101071896;101072217;101073847;101076241	101070501;101071227;101072042;101072302;101074103;101077672	+;+;+;+;+;+	2560	179	166	205	140	193	217	81	86	705	619	165	581	637	663
ENSMUST00000001806	Coasy	11;11;11;11;11;11;11;11;11;11	101082565;101082999;101084316;101084755;101085008;101085282;101085536;101085790;101085998;101086248	101082690;101083706;101084530;101084886;101085197;101085346;101085620;101085887;101086144;101086619	+;+;+;+;+;+;+;+;+;+	2138	0	0	0	0	0	0	0	0	0	0	0	0	0	0
ENSMUST00000001809	Pabpc1	15;15;15;15;15;15;15;15;15;15;15;15;15;15;15	36595661;36596563;36596964;36597457;36597973;36598202;36598952;36599205;36600593;36600870;36601315;36602846;36605442;36605744;36608314	36596099;36596655;36597094;36597541;36598127;36598312;36599042;36599477;36600688;36601007;36601409;36602985;36605557;36605937;36608973	-;-;-;-;-;-;-;-;-;-;-;-;-;-;-	2817	71	81	101	85	80	61	41	31	192	232	231	203	200	228
ENSMUST00000001812	Smo	6;6;6;6;6;6;6;6;6;6;6;6	29735694;29753470;29754322;29754692;29755174;29755483;29756781;29757257;29758336;29758866;29759484;29759852	29736353;29753675;29754531;29754864;29755393;29755606;29756873;29757365;29758521;29759014;29759618;29761365	+;+;+;+;+;+;+;+;+;+;+;+	3779	15	86	113	65	17	22	11	18	170	208	91	154	173	208
ENSMUST00000001818	Crnkl1	2;2;2;2;2;2;2;2;2;2;2;2;2;2	145917479;145919740;145920597;145921772;145923844;145924715;145925508;145926776;145928121;145930534;145931270;145932246;145932813;145934554	145918600;145919988;145920698;145922011;145923924;145924774;145925699;145926946;145928299;145930700;145931428;145932337;145932965;145935014	-;-;-;-;-;-;-;-;-;-;-;-;-;-	3428	329	281	376	217	290	331	149	144	1191	1142	440	1027	1084	1369
ENSMUST00000001824	Folh1	7;7;7;7;7;7;7;7;7;7;7;7;7;7;7;7;7;7;7	86719352;86723276;86725409;86725883;86729074;86731726;86734092;86736449;86742171;86744371;86746112;86746785;86756938;86761701;86762917;86768136;86771703;86773198;86775639	86719848;86723368;86725490;86726147;86729164;86731817;86734159;86736512;86742253;86744490;86746197;86746883;86757031;86761887;86763042;86768237;86771889;86773306;86775864	-;-;-;-;-;-;-;-;-;-;-;-;-;-;-;-;-;-;-	2671	0	0	0	0	0	0	0	0	1	1	0	0	1	0
ENSMUST00000001825	Chordc1	9;9;9;9;9;9;9;9;9;9;9	18292267;18295300;18301006;18302026;18304283;18305293;18308750;18309833;18311912;18312430;18312778	18292460;18295349;18301062;18302183;18304386;18305351;18308820;18309938;18312031;18312492;18314000	+;+;+;+;+;+;+;+;+;+;+	2205	431	395	639	418	369	406	220	249	1976	2155	1197	1710	1881	2536
ENSMUST00000001826	Naalad2	9;9;9;9;9;9;9;9;9;9;9;9;9;9;9;9;9;9;9;9;9	18323021;18326176;18327364;18330635;18334928;18339391;18347454;18348850;18350850;18351036;18351410;18363142;18364121;18376423;18378608;18379912;18380795;18385045;18385793;18388074;18392099	18323623;18326268;18327445;18330899;18335018;18339482;18347521;18348913;18350932;18351155;18351495;18363240;18364214;18376609;18378733;18380013;18380981;18385156;18385923;18388194;18392123	-;-;-;-;-;-;-;-;-;-;-;-;-;-;-;-;-;-;-;-;-	2831	0	0	0	0	0	0	0	0	0	0	0	0	0	0
ENSMUST00000001834	Rtcb	10;10;10;10;10;10;10;10;10;10;10;10	85938637;85941899;85942488;85943209;85943815;85946191;85947177;85949466;85951355;85953437;85955719;85957615	85939119;85942018;85942598;85943397;85943990;85946350;85947333;85949622;85951454;85953504;85955797;85957823	-;-;-;-;-;-;-;-;-;-;-;-	2009	822	757	928	645	794	824	371	417	2109	2039	971	1947	1968	2186
ENSMUST00000001836	Pwp1	10;10;10;10;10;10;10;10;10;10;10;10;10;10;10	85871831;85874278;85874449;85876298;85876486;85878479;85879262;85879830;85882003;85882871;85884463;85885610;85885797;85887223;85888030	85872014;85874336;85874633;85876383;85876582;85878589;85879392;85879891;85882099;85882932;85884574;85885700;85885918;85887328;85889096	+;+;+;+;+;+;+;+;+;+;+;+;+;+;+	2572	153	153	183	117	148	158	68	70	531	439	75	374	332	595
ENSMUST00000001837	Fbxo7	10;10;10;10;10;10;10;10	86021987;86029009;86030928;86033234;86042922;86044423;86046773;86047722	86022144;86029236;86031069;86033320;86043017;86044599;86046810;86048293	+;+;+;+;+;+;+;+	1498	0	0	0	0	0	0	0	0	0	0	0	0	0	0
ENSMUST00000001845	Capns1	7;7;7;7;7;7;7;7;7;7;7	30186942;30187671;30190052;30190479;30190659;30192162;30192320;30192503;30192867;30193878;30195006	30187533;30187729;30190168;30190557;30190727;30192226;30192377;30192592;30192900;30194101;30195164	-;-;-;-;-;-;-;-;-;-;-	1546	2	3	4	4	1	3	4	2	18	16	14	10	14	13
ENSMUST00000001854	Slc7a10	7;7;7;7;7;7;7;7;7;7;7	35186385;35195087;35197215;35197602;35197798;35198631;35198836;35199225;35199540;35200276;35200718	35186650;35195291;35197366;35197727;35197951;35198754;35198939;35199321;35199689;35200453;35201110	+;+;+;+;+;+;+;+;+;+;+	1949	0	0	0	0	0	0	0	0	1	0	0	0	0	0
ENSMUST00000001867	Evx2	2;2;2	74652991;74657767;74658993	74656335;74658047;74659557	-;-;-	4191	0	0	0	0	0	0	0	0	0	0	0	0	0	0
ENSMUST00000001872	Hoxd13	2;2	74668310;74669886	74669078;74671599	+;+	2483	0	0	0	0	0	0	0	0	0	0	0	0	0	0
ENSMUST00000001878	Hoxd12	2;2	74675013;74675814	74675654;74677705	+;+	2534	0	0	0	0	0	0	0	0	0	0	0	0	0	0
ENSMUST00000001882	NA	7;7;7;7;7;7;7	101858331;101859097;101859366;101863925;101868398;101869157;101870609	101858744;101859232;101859554;101864093;101868551;101869304;101870781	-;-;-;-;-;-;-	1383	0	0	0	0	0	0	0	0	0	0	0	0	0	0
ENSMUST00000001884	Clpb	7;7;7;7;7;7;7;7;7;7;7;7;7;7;7;7	101663633;101667248;101687288;101706483;101722705;101751234;101763581;101773080;101774192;101778572;101779202;101785328;101786100;101786287;101786646;101787505	101664213;101667299;101687374;101706586;101722833;101751331;101763695;101773157;101774247;101778616;101779363;101785484;101786173;101786406;101786750;101790168	+;+;+;+;+;+;+;+;+;+;+;+;+;+;+;+	4627	105	85	103	80	145	124	50	37	165	141	60	186	110	222
ENSMUST00000001900	Zdhhc4	5;5;5;5;5;5;5;5	143316489;143320231;143321769;143324132;143324885;143326099;143328391;143329166	143316832;143320475;143321894;143324310;143324958;143326223;143328570;143329256	-;-;-;-;-;-;-;-	1364	0	0	0	0	0	0	0	0	0	0	0	0	0	0
ENSMUST00000001920	Aif1l	2;2;2;2;2;2	31950260;31950529;31962215;31965071;31969630;31970903	31950381;31950590;31962281;31965112;31969792;31973442	+;+;+;+;+;+	2996	1	7	8	0	6	1	2	1	19	27	36	25	19	15
ENSMUST00000001921	Cpa3	3;3;3;3;3;3;3;3;3;3;3	20215617;20219755;20222087;20223232;20225087;20227165;20228808;20229014;20239554;20241915;20242104	20215992;20219839;20222289;20223322;20225197;20227266;20228909;20229116;20239678;20241990;20242181	-;-;-;-;-;-;-;-;-;-;-	1452	0	3	18	0	1	0	0	0	1	0	0	2	1	3
ENSMUST00000001927	Ltbp1	17;17;17;17;17;17;17;17;17;17;17;17;17;17;17;17;17;17;17;17;17;17;17;17;17;17;17;17;17;17;17;17;17;17	75005568;75007331;75065911;75151265;75179037;75225156;75226967;75248894;75252344;75266488;75273867;75276396;75278952;75282328;75282920;75290015;75291291;75292756;75296224;75310156;75312976;75315003;75320971;75327197;75348744;75352687;75359290;75360712;75362510;75363338;75364339;75385073;75389430;75390372	75006361;75007401;75066202;75151434;75179204;75225380;75227241;75248996;75252415;75266610;75274034;75276623;75278974;75282427;75283018;75290140;75291416;75292878;75296343;75310278;75313098;75315125;75321093;75327322;75348869;75352830;75359469;75360798;75362638;75363478;75364509;75385195;75389579;75391767	+;+;+;+;+;+;+;+;+;+;+;+;+;+;+;+;+;+;+;+;+;+;+;+;+;+;+;+;+;+;+;+;+;+	6671	2	2	4	1	2	0	0	1	0	0	1	0	0	1
ENSMUST00000001950	Tollip	7;7;7;7;7;7	141881583;141889507;141890702;141891984;141892740;141902276	141884581;141889597;141890854;141892166;141892889;141902487	-;-;-;-;-;-	3788	2746	2278	2778	2328	2529	2494	1399	1184	4283	4203	1473	3749	3689	4658
ENSMUST00000001963	Ace	11;11;11;11;11;11;11;11;11;11;11;11;11;11;11;11;11;11;11;11;11;11;11;11;11	105967945;105968907;105969701;105970553;105971292;105972017;105972361;105972861;105973392;105973779;105974104;105974667;105975536;105976545;105976952;105979170;105979481;105981498;105981768;105985045;105985573;105985990;105988016;105988429;105988802	105968245;105969074;105969794;105970696;105971483;105972114;105972533;105973084;105973536;105973877;105974226;105974878;105975672;105976703;105977039;105979313;105979672;105981595;105981940;105985268;105985717;105986088;105988138;105988616;105989964	+;+;+;+;+;+;+;+;+;+;+;+;+;+;+;+;+;+;+;+;+;+;+;+;+	4906	0	8	15	1	3	7	0	2	21	35	31	25	22	23
ENSMUST00000001964	Ace	11;11;11;11;11;11;11;11;11;11;11;11;11;11	105975208;105975536;105976545;105976952;105979170;105979481;105981498;105981768;105985045;105985573;105985990;105988016;105988429;105988802	105975403;105975672;105976703;105977039;105979313;105979672;105981595;105981940;105985268;105985717;105986088;105988138;105988616;105989253	+;+;+;+;+;+;+;+;+;+;+;+;+;+	2418	0	0	0	0	0	0	0	0	0	0	0	0	0	0
ENSMUST00000001965	Kcnh6	11;11;11;11;11;11;11;11;11;11;11;11;11	106008173;106008983;106014128;106014385;106017235;106018752;106020122;106020491;106023725;106025794;106026716;106027557;106033783	106008278;106009213;106014289;106014590;106017660;106019151;106020321;106020743;106023918;106025878;106026872;106027737;106034549	+;+;+;+;+;+;+;+;+;+;+;+;+	3368	148	145	177	67	128	123	44	28	231	229	6	162	145	315
ENSMUST00000001974	Trmt1	8;8;8;8;8;8;8;8;8;8;8;8;8;8;8;8;8	84688866;84689632;84690517;84690811;84691252;84695222;84695428;84696827;84697115;84697269;84697425;84697646;84698185;84698393;84699139;84699341;84699603	84689376;84689908;84690572;84690947;84691439;84695337;84695540;84696975;84697201;84697338;84697559;84697731;84698293;84698469;84699258;84699470;84699808	+;+;+;+;+;+;+;+;+;+;+;+;+;+;+;+;+	2567	0	0	2	0	1	0	0	0	0	0	1	0	0	0
ENSMUST00000001975	Nacc1	8;8;8;8;8;8	84670483;84674765;84674999;84676085;84676341;84687675	84673304;84674862;84675104;84676258;84677252;84687862	-;-;-;-;-;-	4300	1702	1492	2012	1394	1754	1583	537	524	2126	1764	231	1567	1530	2334
ENSMUST00000001984	Ceacam9	7;7;7	16721929;16723625;16725199	16722030;16723984;16726110	+;+;+	1374	0	0	0	0	0	0	0	0	0	0	0	0	0	0
ENSMUST00000001989	Uba1	X;X;X;X;X;X;X;X;X;X;X;X;X;X;X;X;X;X;X;X;X;X;X;X;X;X	20662898;20668449;20668692;20668849;20669128;20670204;20670544;20670741;20671356;20671690;20671971;20672244;20672435;20672816;20675586;20675879;20678199;20678589;20679391;20679593;20680783;20681108;20681323;20681903;20682109;20682378	20663125;20668565;20668750;20669017;20669262;20670310;20670634;20670873;20671453;20671836;20672147;20672348;20672515;20672971;20675751;20676075;20678263;20678784;20679465;20679782;20680871;20681200;20681514;20682004;20682209;20683179	+;+;+;+;+;+;+;+;+;+;+;+;+;+;+;+;+;+;+;+;+;+;+;+;+;+	4071	92	77	80	67	99	85	55	38	5	2	1	2	2	7
ENSMUST00000001995	NA	6;6;6;6;6;6;6;6;6;6;6;6;6;6;6;6;6;6;6;6;6;6;6;6;6;6;6;6;6;6;6;6;6;6;6;6;6;6;6;6;6;6;6;6;6;6;6;6;6;6;6;6	125552963;125554453;125555350;125565783;125566130;125570500;125588417;125590179;125591150;125591634;125598482;125599252;125600630;125603324;125604130;125608102;125614035;125615960;125624539;125626235;125628341;125631097;125635555;125635868;125637380;125637967;125639263;125642035;125645637;125645842;125646253;125647745;125648782;125649117;125655032;125656616;125657000;125658716;125662965;125663504…	125553199;125554507;125555514;125565885;125566338;125570624;125588633;125590301;125591261;125591680;125598618;125599390;125600730;125603519;125604345;125608342;125614129;125616120;125624642;125626373;125628475;125631243;125635695;125635981;125637536;125638125;125639398;125643413;125645753;125645982;125646396;125647909;125648825;125649294;125655252;125656808;125657341;125658915;125663067;125663578…	+;+;+;+;+;+;+;+;+;+;+;+;+;+;+;+;+;+;+;+;+;+;+;+;+;+;+;+;+;+;+;+;+;+;+;+;+;+;+;+;+;+;+;+;+;+;+;+;+;+;+;+	8817	0	0	0	0	0	0	0	0	0	0	0	0	0	0
ENSMUST00000002007	Siae	9;9;9;9;9;9;9;9;9;9	37613847;37616800;37622899;37627700;37631349;37632958;37633621;37642640;37644752;37646297	37613926;37616961;37623074;37627838;37631604;37633067;37633754;37642797;37644947;37648318	+;+;+;+;+;+;+;+;+;+	3433	81	72	124	59	88	79	33	50	179	141	63	132	139	207
ENSMUST00000002008	Vsig2	9;9;9;9;9;9;9	37539255;37539869;37540294;37541327;37542355;37542589;37544010	37539438;37540026;37540501;37541485;37542474;37542733;37544205	+;+;+;+;+;+;+	1170	0	1	2	0	2	0	2	0	5	3	13	3	7	7
ENSMUST00000002011	Esam	9;9;9;9;9;9;9	37528078;37531488;37534153;37534538;37536598;37537006;37537464	37528290;37531675;37534354;37534693;37536720;37537132;37538319	+;+;+;+;+;+;+	1865	0	5	12	7	6	3	2	1	50	75	79	44	71	46
ENSMUST00000002013	Spa17	9;9;9;9;9	37603295;37605793;37607617;37611836;37613556	37603486;37605870;37607687;37612018;37613720	-;-;-;-;-	689	641	522	629	437	567	591	402	434	934	901	640	870	930	917
ENSMUST00000002025	Tktl2	8	66511756	66513776	+	2021	0	0	0	0	0	0	0	0	0	0	0	0	0	0
ENSMUST00000002029	Emd	X;X;X;X;X;X	74254687;74255208;74255453;74255743;74256878;74257007	74255033;74255315;74255530;74255876;74256924;74257887	+;+;+;+;+;+	1595	77	96	113	71	71	68	36	31	300	306	108	254	299	325
ENSMUST00000002043	Ccdc47	11;11;11;11;11;11;11;11;11;11;11;11;11	106197408;106202011;106202384;106202728;106203538;106204921;106205360;106208006;106208195;106210288;106211673;106213081;106216149	106201016;106202178;106202493;106202786;106203623;106205031;106205461;106208071;106208316;106210462;106211780;106213361;106216344	-;-;-;-;-;-;-;-;-;-;-;-;-	5193	638	618	762	536	713	670	410	320	2723	2684	1010	2381	2354	3084
ENSMUST00000002044	Map3k3	11;11;11;11;11;11;11;11;11;11;11;11;11;11;11;11	106084613;106096991;106110744;106114184;106117490;106123786;106142425;106145686;106148565;106148814;106149482;106150270;106151009;106151618;106152217;106153966	106084933;106097112;106110784;106114283;106117603;106123906;106142558;106145759;106148632;106148906;106149673;106150418;106151140;106151747;106152394;106155446	+;+;+;+;+;+;+;+;+;+;+;+;+;+;+;+	3450	219	221	339	182	255	240	60	57	248	218	18	209	115	402
ENSMUST00000002048	Taco1	11;11;11;11;11	106066061;106069506;106071867;106072531;106073101	106066518;106069612;106071994;106072708;106073612	+;+;+;+;+	1383	163	172	211	118	185	144	53	50	443	391	99	320	315	595
ENSMUST00000002053	Npas1	7;7;7;7;7;7;7;7;7;7;7;7	16455721;16459186;16460806;16461330;16461781;16462150;16463248;16465107;16465361;16474593;16475507;16476645	16456304;16459280;16460953;16461436;16461938;16462265;16463416;16465196;16465434;16474828;16475684;16476780	-;-;-;-;-;-;-;-;-;-;-;-	2091	61	44	56	36	41	36	9	16	9	7	12	4	4	22
ENSMUST00000002063	Ap4e1	2;2;2;2;2;2;2;2;2;2;2;2;2;2;2;2;2;2;2;2;2	127008730;127011791;127014170;127019286;127028172;127033530;127035044;127037786;127043421;127043647;127046148;127046846;127047043;127049260;127052180;127056181;127060262;127061526;127063270;127064872;127066542	127008900;127011862;127014293;127019359;127028293;127033689;127035210;127037859;127043543;127043756;127046287;127046958;127047161;127049562;127052294;127056304;127060520;127062038;127063460;127065029;127067909	+;+;+;+;+;+;+;+;+;+;+;+;+;+;+;+;+;+;+;+;+	4600	105	116	127	87	95	80	44	23	311	300	46	247	169	480
ENSMUST00000002064	Blvra	2;2;2;2;2;2;2;2	127070667;127080530;127082932;127085963;127086845;127092039;127095086;127096735	127070730;127080658;127083050;127086082;127086942;127092146;127095257;127097084	+;+;+;+;+;+;+;+	1160	66	65	78	39	69	67	25	17	376	377	108	329	382	365
ENSMUST00000002073	Ltbp2	12;12;12;12;12;12;12;12;12;12;12;12;12;12;12;12;12;12;12;12;12;12;12;12;12;12;12;12;12;12;12;12;12;12;12;12	84783212;84784754;84785204;84785728;84785974;84786356;84787366;84787904;84789084;84789758;84790242;84790995;84791597;84791822;84792957;84793619;84793944;84795041;84799372;84803787;84804357;84806300;84807171;84808425;84809148;84809585;84813240;84815962;84828448;84829134;84830016;84830643;84831748;84853687;84868677;84875756	84784395;84784903;84785485;84785895;84786111;84786484;84787449;84788095;84789227;84789883;84790373;84791117;84791722;84791944;84793082;84793744;84794066;84795160;84799491;84803915;84804485;84806413;84807210;84808444;84809363;84809749;84813362;84816036;84828550;84829417;84830222;84830813;84831923;84853939;84868747;84876532	-;-;-;-;-;-;-;-;-;-;-;-;-;-;-;-;-;-;-;-;-;-;-;-;-;-;-;-;-;-;-;-;-;-;-;-	6769	3	2	3	3	2	1	0	1	1	0	0	0	0	0
ENSMUST00000002079	Plxnb3	X;X;X;X;X;X;X;X;X;X;X;X;X;X;X;X;X;X;X;X;X;X;X;X;X;X;X;X;X;X;X;X;X;X;X	73757099;73758523;73759894;73760895;73761106;73762167;73762471;73762716;73762908;73763152;73763360;73763783;73763978;73764362;73765267;73766005;73766359;73766637;73766941;73767291;73767521;73767781;73767958;73768340;73768690;73769134;73769602;73769790;73770256;73770579;73771095;73771411;73771543;73771746;73772146	73757150;73759583;73760073;73761023;73761206;73762296;73762627;73762824;73763022;73763277;73763476;73763876;73764147;73764513;73765372;73766135;73766535;73766832;73767180;73767452;73767672;73767881;73768181;73768518;73768756;73769461;73769705;73769886;73770434;73770739;73771242;73771475;73771618;73771820;73772514	+;+;+;+;+;+;+;+;+;+;+;+;+;+;+;+;+;+;+;+;+;+;+;+;+;+;+;+;+;+;+;+;+;+;+	6030	0	0	0	0	0	0	0	0	0	0	0	0	0	0
ENSMUST00000002080	Pdzd4	X;X;X;X;X;X;X;X	73793359;73796101;73796376;73796830;73798194;73798758;73799834;73824282	73795920;73796211;73796477;73796892;73798292;73798848;73800087;73824969	-;-;-;-;-;-;-;-	3970	51	39	42	34	41	33	10	9	10	8	2	8	8	12
ENSMUST00000002081	Srpk3	X;X;X;X;X;X;X;X;X;X;X;X;X;X;X	73774405;73774584;73774893;73775104;73775478;73776020;73776198;73776461;73776970;73777188;73777509;73777924;73778105;73778254;73778504	73774506;73774714;73775001;73775191;73775565;73776126;73776363;73776486;73777099;73777427;73777609;73778031;73778174;73778346;73778925	+;+;+;+;+;+;+;+;+;+;+;+;+;+;+	1981	0	0	0	0	0	0	0	0	0	0	0	0	0	0
ENSMUST00000002084	Abcd1	X;X;X;X;X;X;X;X;X;X	73716597;73720914;73728984;73729209;73730794;73734009;73734462;73736790;73737103;73737312	73717930;73721094;73729126;73729377;73730888;73734154;73734607;73736874;73737228;73738534	+;+;+;+;+;+;+;+;+;+	3648	181	178	226	114	136	118	67	34	603	647	272	533	497	736
ENSMUST00000002087	Pnck	X;X;X;X;X;X;X;X;X;X;X;X	73655994;73656670;73656912;73657071;73657231;73657438;73657720;73658019;73658254;73658688;73659180;73659727	73656386;73656814;73656999;73657149;73657343;73657513;73657843;73658157;73658328;73658819;73659249;73659828	-;-;-;-;-;-;-;-;-;-;-;-	1536	0	0	0	0	0	0	0	0	0	0	0	0	0	0
ENSMUST00000002090	Ssr4	X;X;X;X;X;X	73787062;73788838;73789800;73790031;73790359;73790654	73787306;73788953;73789874;73790120;73790424;73790826	+;+;+;+;+;+	765	0	0	0	0	0	0	0	0	0	0	0	0	0	0
ENSMUST00000002091	Bcap31	X;X;X;X;X;X;X;X	73686178;73687837;73688660;73689547;73706997;73712445;73714793;73716118	73686595;73687937;73688780;73689682;73707144;73712545;73714928;73716175	-;-;-;-;-;-;-;-	1219	1062	900	1097	863	1027	1073	557	580	2006	1975	619	1883	1917	2038
ENSMUST00000002095	Kmt2a	9;9;9;9;9;9;9;9;9;9;9;9;9;9;9;9;9;9;9;9;9;9;9;9;9;9;9;9;9;9;9;9;9;9;9;9	44803355;44809064;44809715;44810636;44810902;44812987;44814575;44816595;44817706;44818283;44822687;44823228;44824325;44824521;44825390;44826822;44828784;44829078;44830050;44830395;44831224;44832861;44833907;44835802;44836144;44836551;44840971;44841563;44842310;44842533;44843358;44845389;44846853;44847404;44852937;44880849	44808177;44809193;44809798;44810739;44811080;44813061;44814745;44816659;44817786;44822519;44822869;44823388;44824403;44824638;44825548;44826959;44828890;44829271;44830123;44830505;44831397;44833045;44834020;44835922;44836239;44836697;44841084;44841694;44842383;44842916;44843422;44845623;44847030;44850054;44853006;44881274	-;-;-;-;-;-;-;-;-;-;-;-;-;-;-;-;-;-;-;-;-;-;-;-;-;-;-;-;-;-;-;-;-;-;-;-	16439	0	0	0	0	0	0	0	0	0	0	0	0	0	0
ENSMUST00000002099	Ift46	9;9;9;9;9;9;9;9;9;9;9;9	44772935;44773688;44778562;44782100;44783731;44783960;44784332;44786294;44786838;44789567;44789891;44790485	44773173;44773784;44778638;44782233;44783805;44784053;44784460;44786415;44786904;44789627;44789976;44792714	+;+;+;+;+;+;+;+;+;+;+;+	3411	74	91	71	32	96	105	24	21	185	201	35	154	134	358
ENSMUST00000002100	Tmem25	9;9;9;9;9;9;9;9;9	44793776;44795191;44795410;44795682;44795996;44796324;44798121;44798664;44799181	44795048;44795277;44795510;44795712;44796127;44796614;44798432;44798757;44799307	-;-;-;-;-;-;-;-;-	2448	0	0	0	0	0	0	0	0	0	0	0	0	0	0
ENSMUST00000002101	Cd3g	9;9;9;9;9;9;9	44969572;44970691;44971263;44973506;44974163;44975247;44980266	44969917;44970773;44971306;44973637;44974390;44975270;44980431	-;-;-;-;-;-;-	1023	0	5	5	0	0	0	0	0	3	3	0	5	3	0
ENSMUST00000002112	Trappc6a	7;7;7;7;7;7	19508712;19514201;19514422;19515007;19515204;19515846	19508832;19514268;19514539;19515090;19515297;19516145	+;+;+;+;+;+	785	0	0	0	0	0	0	0	0	0	0	0	0	0	0
ENSMUST00000002121	Supt6	11;11;11;11;11;11;11;11;11;11;11;11;11;11;11;11;11;11;11;11;11;11;11;11;11;11;11;11;11;11;11;11;11;11;11;11;11	78206746;78208050;78208852;78209102;78209424;78211797;78212083;78212669;78213267;78216205;78217841;78219168;78219883;78221121;78222110;78222348;78222770;78223154;78224366;78224596;78225307;78225664;78225947;78226180;78226675;78226891;78228629;78228954;78229397;78230166;78230928;78231773;78232018;78232505;78232675;78233545;78245548	78207769;78208237;78209018;78209179;78209536;78211921;78212196;78212907;78213462;78216345;78217983;78219315;78220090;78221248;78222277;78222485;78222905;78223230;78224483;78224735;78225502;78225818;78226097;78226309;78226773;78227039;78228771;78229043;78229513;78230267;78231201;78231857;78232210;78232581;78232833;78233683;78245987	-;-;-;-;-;-;-;-;-;-;-;-;-;-;-;-;-;-;-;-;-;-;-;-;-;-;-;-;-;-;-;-;-;-;-;-;-	6488	419	395	453	326	406	375	137	114	154	118	149	126	136	146
ENSMUST00000002127	Unc119	11;11;11;11;11	78343482;78347218;78347797;78348087;78348531	78343786;78347331;78347899;78348259;78349164	+;+;+;+;+	1329	0	0	0	0	0	0	0	0	1	0	0	0	0	0
ENSMUST00000002128	Rab34	11;11;11;11;11;11;11;11;11;11;11	78188430;78189178;78189571;78190130;78190289;78190478;78190685;78191208;78191365;78191575;78191774	78188511;78189390;78189662;78190195;78190390;78190542;78190736;78191289;78191455;78191682;78192188	+;+;+;+;+;+;+;+;+;+;+	1368	0	0	0	0	0	0	0	0	0	0	0	0	0	0
ENSMUST00000002133	Sdf2	11;11;11	78245746;78251016;78254851	78246170;78251212;78255496	+;+;+	1268	41	47	47	38	32	38	15	19	135	111	3	95	106	140
ENSMUST00000002145	Hsf2bp	17;17;17;17;17;17;17;17	31944769;31987348;32007676;32011176;32013318;32022766;32033261;32034445	31946811;31987451;32007793;32011308;32013467;32022869;32033411;32034508	-;-;-;-;-;-;-;-	2867	0	1	0	0	0	1	0	0	5	5	10	5	4	2
ENSMUST00000002152	Bbc3	7;7;7;7	16309616;16312126;16313627;16317118	16309861;16312414;16313817;16318205	+;+;+;+	1814	42	38	64	41	95	73	27	21	208	253	159	261	199	266
ENSMUST00000002171	Psmc3	2;2;2;2;2;2;2;2;2;2;2;2;2	91054055;91054575;91054979;91055458;91055648;91055905;91056658;91056912;91057765;91058010;91059046;91063897;91066030	91054331;91054658;91055104;91055562;91055710;91056042;91056801;91057060;91057861;91058155;91059127;91063964;91066369	+;+;+;+;+;+;+;+;+;+;+;+;+	1819	1	3	3	1	8	3	0	0	2	4	5	1	2	3
ENSMUST00000002172	Acp2	2;2;2;2;2;2;2;2;2;2;2	91202909;91203601;91204240;91205756;91206010;91206188;91206717;91207817;91208040;91208261;91210607	91203048;91203696;91204326;91205908;91206108;91206277;91206849;91207899;91208146;91208436;91214098	+;+;+;+;+;+;+;+;+;+;+	4656	797	664	852	571	747	698	410	318	2194	2098	925	1954	1810	2209
ENSMUST00000002176	Celf2	2;2;2;2;2;2;2;2;2;2;2;2;2;2;2;2	6539694;6547042;6549832;6553785;6560671;6585974;6600034;6604024;6607882;6615688;6624671;6664115;6721417;6962379;7185472;7395858	6545675;6547213;6549975;6553964;6560790;6586108;6600097;6604182;6607961;6615822;6624719;6664197;6721613;6962414;7185510;7396000	-;-;-;-;-;-;-;-;-;-;-;-;-;-;-;-	7718	0	0	0	0	0	0	0	1	0	0	0	0	0	0
ENSMUST00000002177	Nr1h3	2;2;2;2;2;2;2;2;2;2	91184061;91184655;91184942;91190185;91190462;91190739;91191789;91192560;91193617;91194965	91184482;91184749;91185055;91190284;91190641;91190947;91192055;91192742;91193696;91195116	-;-;-;-;-;-;-;-;-;-	1802	0	0	0	0	0	0	0	0	1	0	0	0	0	1
ENSMUST00000002180	Spi1	2;2;2;2;2	91096096;91099430;91113255;91114245;91115075	91096993;91099526;91113445;91114410;91115756	+;+;+;+;+	2034	4	37	106	3	4	5	4	0	19	11	7	17	26	21
ENSMUST00000002198	Sf3a1	11;11;11;11;11;11;11;11;11;11;11;11;11;11;11;11	4160350;4161046;4166496;4167633;4171062;4173080;4174032;4175036;4175395;4176270;4176481;4177413;4178071;4179141;4179354;4180034	4160550;4161167;4166703;4167890;4171136;4173230;4174219;4175153;4175580;4176391;4176726;4177620;4178225;4179242;4179425;4182541	+;+;+;+;+;+;+;+;+;+;+;+;+;+;+;+	4920	762	723	915	617	700	702	299	274	2349	2269	859	1853	1968	2582
ENSMUST00000002259	Clgn	8;8;8;8;8;8;8;8;8;8;8;8;8;8;8	83389867;83395443;83397002;83397649;83399949;83408154;83409486;83410350;83420204;83420419;83423021;83424073;83424571;83425525;83426526	83389977;83395592;83397078;83397707;83400090;83408235;83409678;83410539;83420317;83420569;83423236;83424198;83424733;83425625;83428552	+;+;+;+;+;+;+;+;+;+;+;+;+;+;+	3902	1886	1621	1917	1590	1839	1759	1340	1128	3107	3112	1417	3048	2946	3149
ENSMUST00000002274	Napsa	7;7;7;7;7;7;7;7;7	44572432;44581204;44581421;44581683;44582342;44584999;44585219;44585714;44586559	44572689;44581339;44581544;44581801;44582541;44585121;44585363;44585812;44586862	+;+;+;+;+;+;+;+;+	1508	9	36	130	5	9	11	6	4	23	32	4	20	23	27
ENSMUST00000002275	Vrk3	7;7;7;7;7;7;7;7;7;7;7;7;7;7;7	44748413;44752115;44753816;44757746;44759700;44760878;44762991;44764125;44764783;44767122;44768443;44769533;44770864;44775376;44777222	44748651;44752176;44753955;44757895;44759894;44760942;44763057;44764209;44764888;44767214;44768575;44769653;44770922;44775535;44777515	+;+;+;+;+;+;+;+;+;+;+;+;+;+;+	1969	29	37	40	21	33	37	12	6	202	191	145	196	197	192
ENSMUST00000002280	Smg9	7;7;7;7;7;7;7;7;7;7;7;7;7;7	24399619;24403392;24405527;24405688;24406035;24407521;24414939;24416499;24416921;24420014;24420576;24420813;24421120;24422300	24399891;24403547;24405601;24405952;24406132;24407633;24415050;24416594;24417006;24420120;24420683;24420941;24421264;24422778	+;+;+;+;+;+;+;+;+;+;+;+;+;+	2242	6	5	9	2	3	4	3	1	74	61	88	49	66	68
ENSMUST00000002284	Plaur	7;7;7;7;7;7;7	24462500;24465131;24466675;24471899;24472573;24474210;24475239	24462567;24465241;24466818;24472054;24472707;24474356;24475873	+;+;+;+;+;+;+	1396	2	21	108	1	2	2	2	0	14	32	67	19	23	15
ENSMUST00000002289	Uchl3	14;14;14;14;14;14;14;14;14	101653967;101654208;101665761;101666512;101666992;101668529;101690572;101695159;101695902	101654105;101654219;101665889;101666668;101667077;101668576;101690647;101695217;101696124	+;+;+;+;+;+;+;+;+	929	67	99	158	66	60	91	38	47	385	378	215	320	348	406
ENSMUST00000002291	Paxip1	5;5;5;5;5;5;5;5;5;5;5;5;5;5;5;5;5;5;5;5;5	27740667;27744115;27744257;27744421;27748814;27750963;27752744;27754485;27756953;27758431;27759370;27759973;27761577;27765138;27765591;27772004;27775566;27781422;27783730;27788643;27791199	27742503;27744175;27744332;27744555;27748914;27751131;27752846;27754555;27756996;27758615;27759491;27760110;27761672;27765232;27766290;27772624;27775679;27781485;27783773;27788777;27791339	-;-;-;-;-;-;-;-;-;-;-;-;-;-;-;-;-;-;-;-;-	5052	460	399	543	308	471	411	153	120	817	743	361	666	653	905
ENSMUST00000002292	Rmnd5a	6;6;6;6;6;6;6;6;6	71388634;71394625;71396852;71398361;71399127;71413250;71414785;71429018;71439998	71393188;71394779;71396954;71398526;71399293;71413350;71414919;71429160;71440637	-;-;-;-;-;-;-;-;-	6165	176	136	155	121	153	117	59	72	250	240	289	239	235	244
ENSMUST00000002297	Mov10	3;3;3;3;3;3;3;3;3;3;3;3;3;3;3;3;3;3;3;3	104794836;104795325;104795694;104795860;104796767;104796970;104797275;104799392;104799698;104799946;104800275;104800687;104800957;104801398;104802426;104802793;104804131;104804471;104804904;104817936	104795240;104795446;104795782;104795985;104796841;104797161;104797392;104799608;104799795;104800049;104800433;104800834;104801133;104801552;104802594;104802927;104804385;104804713;104805107;104818242	-;-;-;-;-;-;-;-;-;-;-;-;-;-;-;-;-;-;-;-	3498	0	0	0	0	0	0	0	0	0	0	0	0	0	0
ENSMUST00000002298	Ppm1j	3;3;3;3;3;3;3;3;3;3	104781056;104782601;104783127;104783654;104784043;104784634;104784956;104785186;104785398;104785702	104781409;104782721;104783414;104783766;104784127;104784752;104785019;104785293;104785549;104786018	+;+;+;+;+;+;+;+;+;+	1721	3	17	21	13	0	0	1	1	59	73	8	29	41	33
ENSMUST00000002303	Rhoc	3;3;3;3;3	104789011;104791889;104792565;104792900;104793870	104789083;104792052;104792685;104793030;104794459	+;+;+;+;+	1079	1	6	5	3	0	0	1	0	32	38	67	40	42	37
ENSMUST00000002305	Kdm7a	6;6;6;6;6;6;6;6;6;6;6;6;6;6;6;6;6;6;6;6	39136623;39144292;39145469;39146855;39147188;39147704;39148942;39149287;39151258;39152813;39158214;39165097;39166667;39168941;39170124;39170769;39173278;39175363;39181528;39206441	39143305;39144559;39145554;39147063;39147336;39147801;39149096;39149411;39151467;39152902;39158305;39165203;39166754;39169103;39170310;39170910;39173438;39175480;39181613;39206789	-;-;-;-;-;-;-;-;-;-;-;-;-;-;-;-;-;-;-;-	9566	112	151	206	68	112	91	38	41	1014	1137	1051	1049	911	1314
ENSMUST00000002310	Prr27	5;5;5;5;5	87825697;87835672;87841258;87842630;87846298	87825892;87835733;87841281;87843559;87846386	+;+;+;+;+	1301	0	0	0	0	0	0	0	0	0	0	0	0	0	0
ENSMUST00000002318	Zfp523	17;17;17;17;17;17;17;17;17;17;17;17;17;17;17	28177418;28179557;28189797;28194966;28195148;28197774;28200111;28200439;28201008;28201261;28202115;28202435;28203086;28204455;28205111	28177525;28179693;28189952;28195046;28195225;28197973;28200227;28200514;28201133;28201440;28202348;28202598;28203250;28204568;28205884	+;+;+;+;+;+;+;+;+;+;+;+;+;+;+	2710	1	0	2	4	5	5	0	1	6	3	5	1	2	4
ENSMUST00000002320	Ppard	17;17;17;17;17;17;17;17	28232754;28237012;28286261;28295341;28297086;28298277;28298584;28299602	28232864;28237095;28286467;28295495;28297224;28298479;28299034;28301469	+;+;+;+;+;+;+;+	3218	214	167	254	148	178	181	74	61	635	565	311	438	508	572
ENSMUST00000002327	Def6	17;17;17;17;17;17;17;17;17;17;17	28207778;28216965;28217601;28219745;28220077;28223672;28223888;28225845;28226101;28227807;28228069	28207938;28217105;28217786;28219981;28220223;28223780;28224186;28226011;28226299;28227897;28228608	+;+;+;+;+;+;+;+;+;+;+	2277	24	62	134	18	33	30	10	7	126	119	39	125	106	106
ENSMUST00000002336	Zim1	7;7;7;7;7;7;7;7	6675443;6682050;6682740;6687684;6688624;6689488;6695650;6696369	6678262;6682181;6682866;6687775;6688689;6689564;6695772;6696450	-;-;-;-;-;-;-;-	3519	1	0	0	0	0	0	0	0	0	0	0	1	0	2
ENSMUST00000002344	Metrn	17;17;17;17;17	25794949;25795374;25796241;25796865;25797066	25795291;25795433;25796641;25796976;25797136	-;-;-;-;-	987	0	0	1	0	0	0	0	0	0	0	0	1	0	0
ENSMUST00000002350	Ciao3	17;17;17;17;17;17;17;17;17;17;17	25773776;25775046;25776966;25777325;25778950;25779498;25780307;25780880;25781241;25781688;25782016	25773887;25775141;25777109;25777457;25779084;25779616;25780436;25780952;25781378;25781845;25783332	+;+;+;+;+;+;+;+;+;+;+	2555	0	0	0	1	0	0	0	0	4	5	2	7	6	3
ENSMUST00000002360	Angptl4	17;17;17;17;17;17;17	33773750;33776950;33777320;33778372;33780530;33780783;33781063	33775568;33777231;33777415;33778485;33780647;33780893;33781575	-;-;-;-;-;-;-	3053	0	0	0	0	0	0	0	0	1	0	0	0	0	0
ENSMUST00000002368	Dbf4	5;5;5;5;5;5;5;5;5;5;5;5	8396973;8399688;8403080;8403612;8404871;8405802;8408234;8408494;8410010;8412121;8421221;8422467	8398162;8399812;8403191;8403740;8404913;8405838;8408310;8408563;8410060;8412300;8421393;8422680	-;-;-;-;-;-;-;-;-;-;-;-	2401	0	0	0	0	0	0	0	0	0	0	0	0	0	0
ENSMUST00000002379	Cd320	17;17;17;17;17	33843091;33846016;33847495;33848017;33848286	33843291;33846141;33847725;33848178;33849774	+;+;+;+;+	2209	1	2	6	1	2	3	1	1	48	51	8	13	20	34
ENSMUST00000002389	Tgm1	14;14;14;14;14;14;14;14;14;14;14;14;14;14;14	55700009;55704304;55704808;55705458;55705841;55706440;55708654;55708883;55709394;55709922;55710468;55710939;55712101;55712434;55712935	55700428;55704440;55704968;55705739;55705994;55706528;55708757;55709021;55709568;55710029;55710586;55711187;55712289;55712754;55713088	-;-;-;-;-;-;-;-;-;-;-;-;-;-;-	2801	0	0	0	0	0	0	0	0	0	0	0	0	0	0
ENSMUST00000002391	Tm9sf1	14;14;14;14;14	55636060;55637859;55640385;55640967;55642594	55636612;55638132;55640570;55641588;55643340	-;-;-;-;-	2382	0	0	0	0	0	0	0	0	0	0	0	0	0	0
ENSMUST00000002395	Rec8	14;14;14;14;14;14;14;14;14;14;14;14;14;14;14;14;14;14;14;14	55618037;55618546;55618742;55618898;55619121;55619580;55621235;55622215;55622427;55622645;55622794;55623164;55623497;55623921;55624076;55624349;55624723;55624885;55625073;55625276	55618353;55618658;55618810;55619040;55619196;55619700;55621319;55622294;55622562;55622717;55622885;55623213;55623634;55623987;55624242;55624397;55624786;55625001;55625179;55625395	+;+;+;+;+;+;+;+;+;+;+;+;+;+;+;+;+;+;+;+	2184	22	33	20	7	2	17	5	13	72	48	8	49	39	86
ENSMUST00000002397	Gmpr2	14;14;14;14;14;14;14;14;14;14	55672235;55672706;55672950;55675327;55675559;55676755;55676928;55677206;55677871;55678224	55672384;55672801;55673069;55675410;55675732;55676836;55677034;55677248;55678030;55678750	+;+;+;+;+;+;+;+;+;+	1543	239	260	358	223	253	267	118	88	475	366	35	281	257	477
ENSMUST00000002398	Adcy4	14;14;14;14;14;14;14;14;14;14;14;14;14;14;14;14;14;14;14;14;14;14;14;14;14;14	55769093;55769373;55769792;55770025;55770372;55771377;55771955;55772246;55772661;55773422;55773666;55774473;55774969;55775215;55775414;55777928;55778281;55778642;55778935;55779703;55779897;55780820;55781580;55781835;55783520;55783940	55769287;55769497;55769906;55770132;55770518;55771535;55772039;55772430;55772786;55773559;55773750;55774570;55775038;55775301;55775448;55778101;55778413;55778800;55779062;55779814;55780045;55780969;55781741;55782032;55783710;55784019	-;-;-;-;-;-;-;-;-;-;-;-;-;-;-;-;-;-;-;-;-;-;-;-;-;-	3394	0	0	0	0	0	0	0	0	0	0	0	0	0	0
ENSMUST00000002400	Mdp1	14;14;14;14;14;14	55657879;55659200;55659370;55659988;55660168;55660338	55659074;55659285;55659477;55660098;55660228;55660508	-;-;-;-;-;-	1733	541	430	635	400	583	535	236	256	1648	1472	1235	1377	1531	1601
ENSMUST00000002403	Dhrs1	14;14;14;14;14;14;14;14;14	55739022;55739552;55739936;55740727;55741183;55743454;55743658;55744918;55745441	55739420;55739632;55740005;55740873;55741315;55743533;55743801;55745088;55745690	-;-;-;-;-;-;-;-;-	1475	0	0	0	0	0	0	0	0	2	4	0	0	0	4
ENSMUST00000002412	Ncan	8;8;8;8;8;8;8;8;8;8;8;8;8;8;8	70093085;70097449;70098050;70100233;70101901;70102410;70103944;70107441;70109941;70111894;70112501;70112726;70114989;70116589;70120728	70096450;70097631;70098194;70100315;70102059;70102523;70104060;70108649;70110537;70112187;70112628;70112900;70115387;70116668;70120873	-;-;-;-;-;-;-;-;-;-;-;-;-;-;-	7195	402	311	330	210	410	256	80	103	1317	957	479	982	1009	967
ENSMUST00000002413	Tmem161a	8;8;8;8;8;8;8;8;8;8;8;8	70172405;70174303;70176845;70177241;70177452;70178867;70180539;70180706;70180936;70181149;70181430;70181883	70172440;70174406;70176925;70177338;70177608;70179018;70180599;70180849;70181049;70181323;70181526;70183681	+;+;+;+;+;+;+;+;+;+;+;+	3018	0	0	0	0	0	0	0	0	0	0	1	0	0	1
ENSMUST00000002418	Borcs8	8;8;8;8;8;8	70139499;70141864;70142474;70145024;70145811;70147090	70139772;70141976;70142538;70145134;70145890;70147256	+;+;+;+;+;+	810	6	12	23	8	7	29	0	10	42	38	1	25	31	45
ENSMUST00000002436	Snx9	17;17;17;17;17;17;17;17;17;17;17;17;17;17;17;17;17;17	5841328;5886997;5890075;5891774;5899327;5902364;5904889;5908354;5908582;5918380;5920071;5920570;5922130;5924605;5926072;5927206;5928205;5930570	5841546;5887083;5890149;5891899;5899495;5902514;5904973;5908479;5908699;5918510;5920174;5920673;5922207;5924681;5926161;5927320;5928296;5931033	+;+;+;+;+;+;+;+;+;+;+;+;+;+;+;+;+;+	2411	553	407	574	373	557	507	169	200	849	657	50	535	519	1000
ENSMUST00000002444	Rfx2	17;17;17;17;17;17;17;17;17;17;17;17;17;17;17;17;17;17	56775897;56777432;56777839;56779880;56780755;56782251;56783607;56784300;56784648;56785297;56786609;56787579;56799250;56803478;56804326;56805358;56808234;56830883	56777074;56777474;56777992;56780088;56780904;56782348;56783761;56784412;56784766;56785412;56786728;56787760;56799324;56803739;56804396;56805447;56808325;56831008	-;-;-;-;-;-;-;-;-;-;-;-;-;-;-;-;-;-	3353	2	1	1	1	1	1	0	0	0	0	0	0	0	0
ENSMUST00000002445	Ranbp3	17;17;17;17;17;17;17;17;17;17;17;17;17;17;17;17	56673225;56686006;56696602;56696718;56701023;56701449;56702763;56705457;56706862;56707163;56707851;56708171;56709214;56710088;56710591;56710856	56673411;56686061;56696638;56696789;56701088;56701541;56702890;56705570;56706965;56707238;56707953;56708280;56709334;56710230;56710777;56711769	+;+;+;+;+;+;+;+;+;+;+;+;+;+;+;+	2511	752	811	1013	657	828	884	341	353	1682	1457	575	1349	1410	1833
ENSMUST00000002452	Ndufa11	17;17;17;17	56717762;56721035;56721319;56721985	56717942;56721127;56721441;56724248	+;+;+;+	2661	469	451	594	387	456	502	232	264	876	831	480	759	810	858
ENSMUST00000002456	Nt5c1b	12;12;12;12;12;12;12;12;12	10370044;10371654;10372832;10374723;10375419;10377158;10380799;10381306;10389804	10370095;10371743;10372975;10375241;10375586;10377287;10380921;10381490;10390170	+;+;+;+;+;+;+;+;+	1778	0	0	0	0	0	0	0	0	0	0	0	0	0	0
ENSMUST00000002457	Bmp8b	4;4;4;4;4;4;4	123105165;123114568;123115146;123121886;123122516;123122947;123124388	123105675;123114757;123115294;123122080;123122595;123123057;123126091	+;+;+;+;+;+;+	2940	3	2	1	2	3	1	0	0	7	8	1	4	6	5
ENSMUST00000002466	Nr2f6	8;8;8;8	71374127;71375749;71378389;71380991	71374754;71376273;71378483;71381960	-;-;-;-	2218	33	28	31	18	41	28	4	9	105	74	26	72	65	98
ENSMUST00000002469	Ocel1	8;8;8;8	71371339;71372468;71372749;71372946	71371985;71372633;71372802;71373689	+;+;+;+	1611	0	0	0	1	0	0	0	0	19	9	1	7	6	9
ENSMUST00000002473	Babam1	8;8;8;8;8;8;8;8;8	71396855;71397679;71398392;71399526;71399729;71401680;71402746;71402976;71404195	71397020;71398025;71398450;71399646;71399807;71401704;71402875;71403062;71404772	+;+;+;+;+;+;+;+;+	1592	594	553	726	426	604	674	323	313	1301	1005	279	955	1016	1245
ENSMUST00000002487	Braf	6;6;6;6;6;6;6;6;6;6;6;6;6;6;6;6;6;6;6;6;6;6	39603237;39614132;39615661;39623579;39627722;39628609;39639590;39640451;39643100;39644238;39646725;39648450;39648821;39651605;39660873;39662004;39665004;39666246;39677378;39677572;39688244;39725107	39610404;39614285;39615795;39623710;39627840;39628655;39639766;39640535;39643217;39644380;39646844;39648486;39648856;39651764;39660989;39662152;39665106;39666349;39677472;39677641;39688345;39725463	-;-;-;-;-;-;-;-;-;-;-;-;-;-;-;-;-;-;-;-;-;-	9728	764	623	878	549	835	661	360	242	2651	2412	538	2165	1903	3056
ENSMUST00000002490	Ndufb2	6;6;6;6	39592585;39596451;39598266;39599392	39592803;39596595;39598361;39599422	+;+;+;+	491	0	0	1	0	0	0	0	0	1	1	0	1	1	0
ENSMUST00000002495	Meis3	7;7;7;7;7;7;7;7;7;7;7;7;7	16175430;16177392;16177709;16177961;16178745;16178951;16182041;16182320;16183791;16184038;16184635;16185448;16186057	16175567;16177573;16177868;16178011;16178795;16179100;16182152;16182468;16183867;16184096;16184718;16185517;16186504	+;+;+;+;+;+;+;+;+;+;+;+;+	1731	0	0	0	0	0	0	0	0	0	0	0	0	0	0
ENSMUST00000002502	Hltf	3;3;3;3;3;3;3;3;3;3;3;3;3;3;3;3;3;3;3;3;3;3;3;3;3	20057811;20058899;20063818;20064566;20065322;20067346;20068966;20072369;20074829;20076491;20082752;20082911;20083750;20086096;20091477;20092678;20098080;20099776;20105641;20106350;20107998;20108755;20109305;20113356;20116572	20058007;20059106;20063984;20064699;20065419;20067420;20069157;20072464;20074895;20076584;20082831;20082955;20083830;20086193;20091620;20092816;20098215;20099955;20105765;20106528;20108123;20108867;20109485;20113436;20118490	+;+;+;+;+;+;+;+;+;+;+;+;+;+;+;+;+;+;+;+;+;+;+;+;+	4955	0	0	0	0	0	0	0	0	0	0	0	0	0	0
ENSMUST00000002518	Tle5	10;10;10;10;10;10;10	81559494;81561219;81564095;81564673;81564848;81565292;81565472	81559668;81561316;81564158;81564717;81564910;81565366;81566362	+;+;+;+;+;+;+	1411	944	1093	1274	827	951	1005	542	551	1598	1369	604	1252	1246	1642
ENSMUST00000002529	Prpf6	2;2;2;2;2;2;2;2;2;2;2;2;2;2;2;2;2;2;2;2;2	181601319;181608120;181615977;181620569;181621787;181622162;181631435;181631931;181632755;181636033;181636893;181640592;181645471;181647289;181649026;181649422;181650097;181651086;181652434;181654836;181655422	181601531;181608288;181616095;181620647;181621963;181622317;181631529;181632087;181632917;181636151;181637111;181640714;181645592;181647427;181649145;181649598;181650230;181651177;181652548;181654962;181655660	+;+;+;+;+;+;+;+;+;+;+;+;+;+;+;+;+;+;+;+;+	3054	0	0	0	0	0	0	0	0	0	0	0	0	0	0
ENSMUST00000002532	Rgs19	2;2;2;2;2;2	181688422;181689377;181689702;181691233;181691490;181693879	181689295;181689611;181689776;181691354;181691595;181693977	-;-;-;-;-;-	1511	0	0	0	0	0	0	0	0	0	1	0	0	0	0
ENSMUST00000002533	Rgs20	1;1;1;1;1	4909576;4912314;4916897;4923847;5019311	4910662;4912548;4916980;4923989;5019539	-;-;-;-;-	1778	5	4	5	2	11	13	3	0	11	9	0	7	1	26
ENSMUST00000002549	Abhd3	18;18;18;18;18;18;18;18;18	10644413;10647726;10647970;10652188;10658780;10682069;10704548;10706001;10706530	10645235;10647891;10648018;10652361;10658892;10682114;10704730;10706164;10706696	-;-;-;-;-;-;-;-;-	1885	0	0	0	0	0	0	0	0	0	0	0	0	0	0
ENSMUST00000002551	Snrpd1	18;18;18;18	10617796;10623631;10626826;10627794	10617926;10623707;10627017;10628230	+;+;+;+	837	339	329	404	239	326	326	209	167	886	887	819	824	984	885
ENSMUST00000002572	Slc9a3r2	17;17;17;17;17;17;17	24639282;24640595;24641709;24641819;24642191;24647527;24649938	24640389;24640657;24641752;24641972;24642370;24647727;24650305	-;-;-;-;-;-;-	2118	3	4	12	3	10	5	1	0	18	7	0	6	0	5
ENSMUST00000002588	Tiam1	16;16;16;16;16;16;16;16;16;16;16;16;16;16;16;16;16;16;16;16;16;16;16;16;16;16;16;16	89787111;89793002;89794678;89798032;89798650;89799961;89804693;89805083;89809368;89811470;89811885;89812948;89821878;89833010;89837759;89843253;89849650;89855845;89858599;89860205;89865234;89867510;89877038;89884678;89897605;89908547;89955936;89960677	89789591;89793174;89794765;89798134;89798708;89800069;89804811;89805262;89809476;89811595;89811953;89813127;89821981;89833234;89837845;89843334;89849754;89856015;89858673;89860351;89865419;89867734;89877210;89885125;89898578;89908715;89956107;89960827	-;-;-;-;-;-;-;-;-;-;-;-;-;-;-;-;-;-;-;-;-;-;-;-;-;-;-;-	7290	0	0	0	0	0	0	0	0	0	0	0	0	0	0
ENSMUST00000002599	Puf60	15;15;15;15;15;15;15;15;15;15;15	76070184;76070749;76071182;76071466;76071740;76072233;76072407;76075542;76075737;76077601;76080850	76070627;76070984;76071317;76071656;76071953;76072325;76072568;76075631;76075832;76077702;76080946	-;-;-;-;-;-;-;-;-;-;-	1861	0	0	0	0	0	0	0	0	0	0	0	0	0	0
ENSMUST00000002603	Scrib	15;15;15;15;15;15;15;15;15;15;15;15;15;15;15;15;15;15;15;15;15;15;15;15;15;15;15;15;15;15;15;15;15;15;15;15;15;15	76047158;76047621;76047922;76048115;76048222;76048442;76048710;76048934;76049203;76049457;76050050;76051402;76051621;76051754;76057387;76057645;76058026;76058962;76059298;76059483;76060567;76061134;76061739;76062670;76063591;76064476;76064697;76064910;76065150;76066090;76066610;76066820;76066994;76067145;76067290;76067477;76067661;76069229	76047537;76047672;76047996;76048152;76048364;76048627;76048857;76049093;76049301;76049540;76050112;76051476;76051677;76051864;76057575;76057938;76058136;76059219;76059378;76059806;76060644;76061223;76061801;76063047;76063755;76064601;76064827;76065076;76065349;76066208;76066754;76066894;76067057;76067201;76067379;76067555;76067778;76069754	-;-;-;-;-;-;-;-;-;-;-;-;-;-;-;-;-;-;-;-;-;-;-;-;-;-;-;-;-;-;-;-;-;-;-;-;-;-	5599	0	0	0	0	0	0	0	0	0	0	0	0	0	0
ENSMUST00000002625	Uck1	2;2;2;2;2;2;2	32255002;32256618;32258090;32258277;32258571;32259580;32259909	32256211;32256666;32258184;32258419;32258667;32259739;32260159	-;-;-;-;-;-;-	2005	40	17	34	22	24	32	9	11	122	112	119	118	116	115
ENSMUST00000002640	Scin	12;12;12;12;12;12;12;12;12;12;12;12;12;12;12;12	40059773;40061157;40063212;40068915;40069269;40073302;40076937;40077471;40079596;40080932;40081642;40084285;40104927;40124567;40127881;40133910	40060627;40061217;40063289;40069036;40069446;40073472;40077027;40077592;40079811;40081020;40081774;40084377;40105076;40124728;40128035;40134228	-;-;-;-;-;-;-;-;-;-;-;-;-;-;-;-	2995	0	0	1	0	1	0	0	2	2	17	0	3	1	0
ENSMUST00000002655	Mien1	11;11;11;11	98437708;98438237;98438647;98438858	98438145;98438313;98438744;98438991	-;-;-;-	747	237	222	238	197	218	223	124	142	534	535	437	501	540	511
ENSMUST00000002663	Pon1	6;6;6;6;6;6;6;6;6	5168090;5171741;5175742;5177210;5181439;5184746;5185298;5186934;5193676	5168496;5171869;5175823;5177410;5181565;5184914;5185353;5187004;5193946	-;-;-;-;-;-;-;-;-	1513	62	139	264	186	81	70	29	38	300	270	47	266	261	371
ENSMUST00000002677	Axl	7;7;7;7;7;7;7;7;7;7;7;7;7;7;7;7;7;7;7;7	25757273;25760751;25761405;25763284;25763943;25764422;25766518;25766793;25770218;25770633;25773099;25773343;25774084;25774515;25778370;25778624;25785834;25786887;25787291;25788415	25759013;25760887;25761564;25763393;25764064;25764514;25766595;25766888;25770309;25770765;25773125;25773493;25774223;25774725;25778485;25778704;25786010;25786987;25787516;25788687	-;-;-;-;-;-;-;-;-;-;-;-;-;-;-;-;-;-;-;-	4265	4	10	21	3	1	0	0	0	47	57	16	43	61	47
ENSMUST00000002678	Tgfb1	7;7;7;7;7;7;7	25687002;25692377;25694223;25696918;25697125;25704125;25704784	25688223;25692537;25694340;25696995;25697272;25704278;25705077	+;+;+;+;+;+;+	2175	12	56	157	11	16	10	14	5	62	67	9	48	56	71
ENSMUST00000002683	Ccdc97	7;7;7;7;7	25711106;25714353;25714751;25715735;25718918	25713113;25714482;25715020;25716187;25719088	-;-;-;-;-	3032	382	377	468	314	460	459	158	109	1264	1107	258	924	963	1344
ENSMUST00000002699	Akap8	17;17;17;17;17;17;17;17;17;17;17;17;17;17	32303676;32306490;32309419;32310578;32310953;32312286;32314111;32315442;32315655;32316187;32317067;32317846;32318771;32321085	32305706;32306585;32309549;32310671;32311094;32312373;32314144;32315488;32315784;32316667;32317346;32317878;32318809;32321153	-;-;-;-;-;-;-;-;-;-;-;-;-;-	3695	861	809	1021	685	924	804	390	280	2257	2227	718	1911	2001	2556
ENSMUST00000002708	Shh	5;5;5	28456815;28461322;28466461	28458603;28461583;28467101	-;-;-	2692	0	0	0	0	0	0	0	0	0	0	0	1	0	0
ENSMUST00000002710	Pdcd2l	7;7;7;7;7;7;7	34184499;34186294;34189349;34192736;34196066;34196272;34196536	34184811;34186442;34189456;34193106;34196126;34196438;34196661	-;-;-;-;-;-;-	1295	24	29	34	18	32	25	16	9	143	143	11	138	143	148
ENSMUST00000002733	Gtf2f1	17;17;17;17;17;17;17;17;17;17;17;17;17	57003405;57003721;57003915;57004122;57004309;57004511;57004666;57005360;57006986;57007713;57009688;57010976;57011109	57003631;57003811;57004053;57004195;57004428;57004572;57004819;57005544;57007156;57007906;57009760;57011022;57011288	-;-;-;-;-;-;-;-;-;-;-;-;-	1717	750	739	904	616	863	848	378	361	1850	1639	367	1484	1541	1977
ENSMUST00000002735	Clpp	17;17;17;17;17;17	56990264;56990606;56991294;56992826;56993448;56995878	56990513;56990677;56991390;56993013;56993553;56996371	+;+;+;+;+;+	1207	378	356	481	304	360	431	164	167	968	838	335	740	792	959
ENSMUST00000002737	Alkbh7	17;17;17;17	56997343;56998389;56998671;56998930	56997567;56998562;56998795;56999322	+;+;+;+	917	6	7	9	8	5	5	2	2	60	49	5	58	54	64
ENSMUST00000002740	Pspn	17;17	56999457;56999862	56999773;57000018	-;-	474	16	17	27	14	22	21	5	6	97	81	15	64	80	104
ENSMUST00000002756	Med6	12;12;12;12;12;12;12;12	81573565;81574525;81579570;81581801;81582633;81588983;81591254;81594940	81573960;81574552;81579685;81581909;81582715;81589074;81591413;81594958	-;-;-;-;-;-;-;-	1003	0	0	0	0	0	0	0	0	0	0	0	0	0	0
ENSMUST00000002757	Cox16	12;12;12;12	81470704;81474587;81480931;81484897	81472351;81474649;81481002;81485120	-;-;-;-	2007	0	0	0	0	0	0	0	0	2	2	2	1	3	4
ENSMUST00000002765	Prkd1	12;12;12;12;12;12;12;12;12;12;12;12;12;12;12;12;12;12;12	50341231;50343054;50364512;50365614;50366302;50383400;50385143;50387216;50388253;50389910;50391326;50392835;50394599;50394830;50419853;50425439;50428103;50489903;50648716	50342220;50343139;50364779;50365712;50366463;50383506;50385215;50387268;50388532;50389987;50391449;50393039;50394676;50395040;50419876;50425599;50428234;50490041;50649223	-;-;-;-;-;-;-;-;-;-;-;-;-;-;-;-;-;-;-	3778	27	44	60	28	40	37	13	8	125	158	63	147	176	203
ENSMUST00000002790	Cse1l	2;2;2;2;2;2;2;2;2;2;2;2;2;2;2;2;2;2;2;2;2;2;2;2;2	166906059;166915170;166919613;166921970;166922155;166922754;166926351;166927244;166927443;166927713;166928958;166929785;166930582;166932133;166934753;166935923;166937342;166939635;166939910;166941218;166941407;166942015;166943060;166944377;166945704	166906177;166915264;166919755;166922071;166922300;166922844;166926458;166927336;166927610;166927842;166929023;166929987;166930666;166932194;166934889;166936026;166937439;166939785;166940118;166941315;166941492;166942096;166943206;166944608;166946389	+;+;+;+;+;+;+;+;+;+;+;+;+;+;+;+;+;+;+;+;+;+;+;+;+	3641	10	12	14	6	12	4	17	2	206	186	223	170	189	180
ENSMUST00000002805	Naa20	2;2;2;2;2;2	145903241;145908591;145911673;145912393;145915534;145915804	145903362;145908615;145911793;145912528;145915679;145916425	+;+;+;+;+;+	1172	0	0	0	0	0	0	0	0	0	0	0	0	0	0
ENSMUST00000002808	Prkra	2;2;2;2;2;2;2;2	76629898;76633533;76636795;76639200;76640241;76643223;76647125;76647792	76630568;76633707;76636889;76639317;76640319;76643304;76647294;76648015	-;-;-;-;-;-;-;-	1614	40	52	86	51	51	72	21	33	258	257	471	250	268	253
ENSMUST00000002809	Fkbp7	2;2;2;2	76663044;76665677;76671697;76672806	76663352;76665810;76671848;76673070	-;-;-;-	860	0	0	1	0	1	0	0	0	9	12	6	10	9	13
ENSMUST00000002817	Camk2b	11;11;11;11;11;11;11;11;11;11;11;11;11;11;11;11;11;11;11	5971672;5972217;5972632;5972813;5979673;5982501;5982721;5988101;5988955;5989332;5989574;5990163;5990320;5992820;5997883;6001338;6015450;6028867;6065474	5971826;5972450;5972726;5972888;5979721;5982572;5982761;5988143;5989038;5989454;5989668;5990246;5990422;5992892;5997948;6001392;6015509;6028961;6065742	-;-;-;-;-;-;-;-;-;-;-;-;-;-;-;-;-;-;-	1872	0	0	0	0	0	0	0	0	0	0	0	0	0	0
ENSMUST00000002818	Ykt6	11;11;11;11;11;11;11	5955693;5959297;5961188;5962337;5962693;5964561;5966009	5956004;5959379;5961288;5962441;5962758;5964662;5967780	+;+;+;+;+;+;+	2541	859	773	1038	678	855	750	351	406	2230	2012	705	1829	1866	2141
ENSMUST00000002825	Baz1b	5;5;5;5;5;5;5;5;5;5;5;5;5;5;5;5;5;5;5	135187264;135196472;135198171;135204990;135209043;135210741;135216590;135221958;135223085;135226510;135228527;135230157;135231600;135236275;135237919;135240027;135242412;135243809;135244106	135187756;135196588;135198315;135205191;135209164;135210938;135218294;135222096;135223218;135226612;135228625;135230334;135231782;135236422;135238066;135240145;135242542;135243912;135246129	+;+;+;+;+;+;+;+;+;+;+;+;+;+;+;+;+;+;+	6492	822	720	954	529	715	693	306	265	2370	2182	960	1897	1887	2640
ENSMUST00000002837	Tmed5	5;5;5;5	108121627;108125901;108130018;108132236	108124759;108126084;108130115;108132620	-;-;-;-	3800	34	25	41	18	23	17	35	15	408	518	162	472	411	710
ENSMUST00000002839	Ppp2r5d	17;17;17;17;17;17;17;17;17;17;17;17;17;17;17	46682991;46684261;46684506;46684665;46685302;46685519;46686054;46686263;46686559;46687034;46687250;46687446;46687837;46700069;46704833	46684126;46684377;46684578;46684766;46685429;46685689;46686107;46686431;46686689;46687126;46687360;46687645;46688029;46700146;46705002	-;-;-;-;-;-;-;-;-;-;-;-;-;-;-	2926	646	579	741	485	634	578	242	224	1033	777	245	678	702	1034
ENSMUST00000002840	Pex6	17;17;17;17;17;17;17;17;17;17;17;17;17;17;17;17;17	46711463;46713908;46714461;46720328;46720512;46721183;46721670;46722244;46722622;46723112;46723324;46723674;46723919;46724391;46724627;46724825;46725188	46712384;46714071;46714544;46720430;46720645;46721294;46721878;46722439;46722698;46723244;46723529;46723735;46724027;46724507;46724704;46724964;46725541	+;+;+;+;+;+;+;+;+;+;+;+;+;+;+;+;+	3200	0	0	0	0	0	0	0	0	0	0	0	0	0	0
ENSMUST00000002844	Mrpl2	17;17;17;17;17;17;17	46646229;46647390;46648237;46648472;46648659;46649035;46649884	46646398;46647558;46648378;46648587;46648769;46649108;46650132	+;+;+;+;+;+;+	1031	0	0	0	0	1	0	0	0	1	1	0	0	1	1
ENSMUST00000002845	Mea1	17;17;17;17	46681137;46681617;46682009;46682719	46681205;46681897;46682111;46683105	+;+;+;+	840	482	419	517	385	424	472	247	325	827	688	37	589	663	842
ENSMUST00000002846	Gnmt	17;17;17;17;17;17	46725664;46726061;46726269;46726606;46727265;46728946	46725971;46726182;46726411;46726716;46727392;46729168	-;-;-;-;-;-	1035	6	11	19	10	17	12	3	4	73	45	2	44	48	57
ENSMUST00000002848	Grin2d	7;7;7;7;7;7;7;7;7;7;7;7	45831883;45834249;45834639;45853203;45854228;45854574;45856740;45857478;45857873;45858450;45861944;45866112	45834087;45834481;45834826;45853363;45854457;45854699;45856893;45857646;45858084;45858564;45862563;45867129	-;-;-;-;-;-;-;-;-;-;-;-	5431	19	27	28	24	25	18	5	7	38	36	4	23	24	53
ENSMUST00000002850	Abcc6	7;7;7;7;7;7;7;7;7;7;7;7;7;7;7;7;7;7;7;7;7;7;7;7;7;7;7;7;7;7;7	45976380;45977244;45979628;45979876;45980968;45982131;45983305;45985061;45986331;45989538;45990288;45992308;45995181;45996655;45998650;45999003;46000998;46002578;46005120;46005437;46008786;46012494;46014069;46015414;46016383;46017474;46018565;46020138;46020541;46028988;46030228	45976944;45977438;45979794;45980034;45981114;45982232;45983431;45985260;45986641;45989745;45990414;45992383;45995340;45996822;45998826;45999129;46001070;46002665;46005266;46005640;46008878;46012655;46014246;46015593;46016514;46017535;46018690;46020266;46020666;46029170;46030302	-;-;-;-;-;-;-;-;-;-;-;-;-;-;-;-;-;-;-;-;-;-;-;-;-;-;-;-;-;-;-	4974	1	2	6	4	1	3	0	2	5	6	5	3	4	5
ENSMUST00000002855	Kdelr1	7;7;7;7;7	45872772;45873759;45874043;45881500;45882977	45873101;45873859;45874201;45881752;45883731	+;+;+;+;+	1598	0	0	1	0	0	0	0	0	1	0	0	0	0	0
ENSMUST00000002874	Ggct	6;6;6;6	54985648;54986833;54989500;54992570	54986001;54986968;54989557;54992707	-;-;-;-	686	0	0	0	1	0	0	0	0	2	2	0	0	0	0
ENSMUST00000002880	Btbd6	12;12;12;12	112976563;112977059;112977253;112977504	112976982;112977149;112977371;112978930	+;+;+;+	2057	0	0	0	0	3	0	0	0	0	1	0	1	1	1
ENSMUST00000002881	Nudt14	12;12;12;12;12	112934733;112938356;112938795;112939279;112941991	112935050;112938593;112938859;112939322;112942118	-;-;-;-;-	793	386	319	407	246	319	360	188	204	887	739	148	696	786	813
ENSMUST00000002883	Sfrp4	13;13;13;13;13;13	19623175;19625028;19625194;19627106;19630066;19632179	19623877;19625108;19625259;19627304;19630129;19632821	+;+;+;+;+;+	1756	11	105	104	11	21	6	5	6	213	245	370	203	313	251
ENSMUST00000002885	Epdr1	13;13;13	19591709;19594447;19619294	19593348;19594655;19619830	-;-;-	2386	127	137	166	74	105	95	51	51	599	587	151	468	497	571
ENSMUST00000002889	Flii	11;11;11;11;11;11;11;11;11;11;11;11;11;11;11;11;11;11;11;11;11;11;11;11;11;11;11;11;11;11	60714143;60714589;60715031;60715284;60715461;60715666;60715803;60716092;60716405;60716655;60717137;60717409;60718120;60718582;60718846;60719025;60719693;60720006;60720361;60720638;60721078;60721447;60721682;60722295;60722585;60723000;60723365;60724791;60725158;60727127	60714447;60714654;60715136;60715390;60715589;60715726;60715957;60716332;60716544;60716843;60717328;60717513;60718291;60718665;60718920;60719107;60719872;60720218;60720497;60720785;60721162;60721604;60721857;60722398;60722746;60723085;60723445;60724862;60725268;60727263	-;-;-;-;-;-;-;-;-;-;-;-;-;-;-;-;-;-;-;-;-;-;-;-;-;-;-;-;-;-	4060	969	840	1102	717	923	934	399	282	1325	971	12	957	778	1628
ENSMUST00000002891	Top3a	11;11;11;11;11;11;11;11;11;11;11;11;11;11;11;11;11;11;11	60740058;60742436;60743933;60745817;60747866;60748112;60749166;60749404;60750576;60752283;60753887;60755944;60756278;60756605;60759297;60761732;60762468;60763366;60776922	60740701;60743124;60744055;60745960;60748031;60748225;60749295;60749589;60750783;60752365;60753961;60756044;60756448;60756748;60759405;60761807;60762541;60763425;60777365	-;-;-;-;-;-;-;-;-;-;-;-;-;-;-;-;-;-;-	3741	1	0	0	0	0	1	0	0	12	13	1	13	12	29
ENSMUST00000002902	Qtrt1	9;9;9;9;9;9;9;9;9;9	21411837;21412233;21412393;21417065;21417272;21418284;21419291;21419439;21419625;21420036	21412097;21412301;21412531;21417143;21417387;21418422;21419366;21419548;21419712;21420277	+;+;+;+;+;+;+;+;+;+	1319	252	220	316	196	256	244	82	89	583	447	204	337	402	535
ENSMUST00000002908	Plin4	17;17;17;17;17;17;17;17;17	56100591;56102409;56103110;56103417;56106117;56108588;56109313;56109538;56109693	56102330;56102495;56103297;56105522;56107374;56108646;56109451;56109605;56109802	-;-;-;-;-;-;-;-;-	5755	0	0	0	0	0	0	0	0	0	0	0	0	0	0
ENSMUST00000002911	Hdgfl2	17;17;17;17;17;17;17;17;17;17;17;17;17;17;17;17	56079657;56082100;56082277;56093522;56096017;56096205;56096848;56097088;56097235;56097882;56098484;56098683;56098974;56099177;56099859;56100345	56079826;56082176;56082415;56093722;56096130;56096276;56097016;56097163;56097526;56097985;56098557;56098753;56099075;56099387;56099985;56100596	+;+;+;+;+;+;+;+;+;+;+;+;+;+;+;+	2251	781	707	879	586	905	830	280	278	1398	1110	419	1029	1118	1507
ENSMUST00000002914	Chaf1a	17;17;17;17;17;17;17;17;17;17;17;17;17;17	56040416;56044062;56046823;56056421;56057718;56058984;56059258;56062085;56062551;56062811;56063328;56064001;56064974;56067407	56040551;56044112;56047634;56056477;56057920;56059065;56059326;56062311;56062719;56062891;56063420;56064256;56065425;56068026	+;+;+;+;+;+;+;+;+;+;+;+;+;+	3308	333	282	372	224	343	308	98	136	900	601	48	582	546	705
ENSMUST00000002923	Adprh	16;16;16;16	38445399;38447248;38450129;38452529	38446104;38447608;38450483;38452689	-;-;-;-	1583	901	860	1061	751	909	964	465	462	1605	1447	470	1345	1311	1799
ENSMUST00000002924	Tmem39a	16;16;16;16;16;16;16;16;16	38562812;38564115;38573054;38575743;38581970;38585176;38586221;38588183;38590912	38563130;38564301;38573276;38575826;38582124;38585518;38586408;38588303;38592162	+;+;+;+;+;+;+;+;+	2871	0	0	0	0	0	0	0	0	0	0	0	0	0	0
ENSMUST00000002925	Timmdc1	16;16;16;16;16;16;16	38498347;38502562;38505412;38508839;38510719;38518367;38522341	38499083;38502672;38505490;38508906;38510807;38518532;38522663	-;-;-;-;-;-;-	1573	193	165	260	164	179	211	95	95	668	566	254	474	540	626
ENSMUST00000002926	Pla1a	16;16;16;16;16;16;16;16;16;16;16	38396119;38397339;38400876;38405537;38407592;38409595;38412086;38414769;38415318;38417060;38432804	38396535;38397503;38400984;38405626;38407759;38409684;38412187;38414877;38415495;38417261;38433145	-;-;-;-;-;-;-;-;-;-;-	1972	2	3	1	0	0	0	0	2	4	4	2	6	2	2
ENSMUST00000002964	Adgre5	8;8;8;8;8;8;8;8;8;8;8;8;8;8;8;8;8;8	83723251;83723979;83724192;83724438;83724618;83724769;83725155;83725865;83727745;83728095;83728281;83729057;83729257;83729382;83733414;83734009;83734296;83741107	83723902;83724077;83724360;83724529;83724687;83724998;83725346;83726029;83727968;83728211;83728440;83729134;83729303;83729525;83733566;83734125;83734352;83741326	-;-;-;-;-;-;-;-;-;-;-;-;-;-;-;-;-;-	2986	0	0	0	0	0	0	0	0	0	0	0	0	0	0
ENSMUST00000002976	Il17ra	6;6;6;6;6;6;6;6;6;6;6;6;6	120463197;120472092;120472926;120473754;120474290;120475229;120475456;120476890;120477396;120478164;120478375;120480003;120480983	120463466;120472116;120473072;120473866;120474416;120475276;120475619;120476973;120477480;120478175;120478482;120480044;120483727	+;+;+;+;+;+;+;+;+;+;+;+;+	3970	94	171	352	113	157	132	67	31	780	776	461	778	797	1013
ENSMUST00000002979	Lamb1	12;12;12;12;12;12;12;12;12;12;12;12;12;12;12;12;12;12;12;12;12;12;12;12;12;12;12;12;12;12;12;12;12	31265293;31266691;31269057;31272430;31278462;31278736;31282557;31285626;31287416;31287879;31288203;31289342;31297626;31298813;31299924;31300207;31301006;31302562;31302904;31304590;31305767;31306975;31307950;31318264;31319919;31320898;31323462;31324176;31326170;31326568;31327645;31329110;31329357	31265601;31266866;31269192;31272503;31278650;31278799;31282759;31285746;31287604;31288058;31288315;31289421;31297761;31298971;31300051;31300330;31301210;31302705;31303135;31304753;31305991;31307189;31308046;31318633;31320103;31321139;31323665;31324320;31326377;31326709;31327821;31329269;31329644	+;+;+;+;+;+;+;+;+;+;+;+;+;+;+;+;+;+;+;+;+;+;+;+;+;+;+;+;+;+;+;+;+	5784	1	0	0	0	0	1	0	0	10	10	12	5	11	11
ENSMUST00000002989	Arrdc2	8;8;8;8;8;8;8;8	70835155;70836220;70836858;70837110;70837444;70838694;70838979;70839128	70835994;70836377;70837020;70837366;70837546;70838841;70839045;70839720	-;-;-;-;-;-;-;-	2329	93	106	120	90	124	109	29	37	258	220	25	228	208	297
ENSMUST00000003017	Tbxas1	6;6;6;6;6;6;6;6;6;6;6;6;6	38918980;38948542;38951878;38982121;39001252;39017892;39021039;39022969;39027640;39071356;39080939;39083693;39084296	38919241;38948635;38951930;38982217;39001368;39017980;39021187;39023099;39027954;39071447;39081076;39083855;39084585	+;+;+;+;+;+;+;+;+;+;+;+;+	1990	0	0	0	0	0	0	0	0	0	0	0	0	0	0
ENSMUST00000003027	Map2k7	8;8;8;8;8;8;8;8;8;8;8;8;8	4238829;4240688;4243304;4243553;4243743;4243951;4244229;4244427;4244695;4244861;4245543;4245695;4247657	4239033;4240735;4243445;4243619;4243856;4244070;4244336;4244606;4244775;4245003;4245588;4245825;4247897	+;+;+;+;+;+;+;+;+;+;+;+;+	1626	0	0	0	0	0	0	0	0	0	0	0	0	0	0
ENSMUST00000003029	Timm44	8;8;8;8;8;8;8;8;8;8;8;8;8	4259731;4260512;4261908;4265226;4266556;4266770;4267255;4267637;4267864;4268300;4269855;4274137;4275843	4260255;4260622;4261997;4265276;4266680;4266862;4267340;4267776;4268013;4268380;4270025;4274232;4275913	-;-;-;-;-;-;-;-;-;-;-;-;-	1790	0	1	0	0	0	0	0	0	0	0	0	0	0	0
ENSMUST00000003035	Disp1	1;1;1;1;1;1;1;1;1;1	183086264;183096244;183098552;183098920;183099917;183107118;183135355;183173496;183202952;183221323	183089870;183096341;183098649;183099047;183100040;183107147;183135876;183173623;183203039;183221529	-;-;-;-;-;-;-;-;-;-	5030	8	10	12	5	13	8	2	2	4	5	0	0	0	2
ENSMUST00000003038	Ap2a2	7;7;7;7;7;7;7;7;7;7;7;7;7;7;7;7;7;7;7;7;7;7	141562180;141588286;141597473;141598702;141602233;141604909;141609807;141611336;141612629;141614199;141619451;141620472;141620792;141621115;141623618;141626108;141627894;141629190;141630059;141630285;141630437;141631292	141562426;141588354;141597615;141598895;141602362;141605010;141609915;141611483;141612797;141614336;141619633;141620569;141621023;141621288;141623781;141626190;141627983;141629313;141630175;141630354;141630571;141633011	+;+;+;+;+;+;+;+;+;+;+;+;+;+;+;+;+;+;+;+;+;+	4639	1478	1287	1729	1135	1443	1486	536	520	2512	2186	642	1913	1834	2836
ENSMUST00000003044	Pnkp	7;7;7;7;7;7;7;7;7;7;7;7;7;7;7;7	44857141;44858163;44858453;44859723;44859888;44860077;44860360;44860863;44860989;44861147;44861318;44861500;44861649;44862194;44862366;44862499	44857554;44858209;44858749;44859802;44859945;44860184;44860431;44860911;44861059;44861239;44861414;44861561;44861758;44862281;44862427;44862925	+;+;+;+;+;+;+;+;+;+;+;+;+;+;+;+	2135	5	6	18	9	11	7	1	2	39	22	55	34	27	24
ENSMUST00000003049	Med25	7;7;7;7;7;7;7;7;7;7;7;7;7;7;7;7;7;7	44879391;44879927;44880252;44880567;44880923;44882759;44882968;44883099;44884119;44884563;44884833;44885080;44885339;44885784;44886172;44891783;44892099;44892231	44879514;44880104;44880470;44880638;44881111;44882866;44883025;44883184;44884247;44884756;44884920;44885210;44885501;44885904;44886270;44891907;44892144;44892397	-;-;-;-;-;-;-;-;-;-;-;-;-;-;-;-;-;-	2297	1193	940	1260	884	1236	1222	478	360	810	555	43	482	428	1021
ENSMUST00000003061	Bcam	7;7;7;7;7;7;7;7;7;7;7;7;7;7;7	19756131;19756708;19758424;19758659;19758960;19760047;19760294;19764040;19764653;19765334;19765613;19766689;19766836;19768452;19770407	19756619;19756825;19758568;19758803;19759096;19760188;19760412;19764196;19764789;19765516;19765709;19766759;19767061;19768573;19770547	-;-;-;-;-;-;-;-;-;-;-;-;-;-;-	2429	63	157	193	59	68	46	14	25	223	288	82	244	255	291
ENSMUST00000003066	Apoe	7;7;7;7	19696272;19697479;19698188;19699011	19697103;19697647;19698272;19699052	-;-;-;-	1128	0	0	0	0	0	0	0	0	0	0	0	0	0	0
ENSMUST00000003071	Apoc4	7;7;7	19678094;19678610;19681305	19678312;19678742;19681416	-;-;-	464	0	1	1	0	0	0	0	0	1	0	0	0	2	0
ENSMUST00000003074	Apoc2	7;7;7;7	19671579;19673229;19673547;19676722	19671848;19673379;19673613;19676864	-;-;-;-	631	0	0	0	0	0	0	0	0	0	0	0	0	0	0
ENSMUST00000003079	Prkar2b	12;12;12;12;12;12;12;12;12;12;12;12	31958476;31960382;31962999;31963898;31965115;31967213;31972050;31975919;31987880;31993731;32038622;32060782	31958721;31960522;31963137;31963963;31965189;31967314;31972203;31976025;31987963;31993783;32038657;32061235	-;-;-;-;-;-;-;-;-;-;-;-	1657	0	0	0	0	0	0	0	0	0	0	0	0	0	0
ENSMUST00000003100	Cyp2f2	7;7;7;7;7;7;7;7;7;7	27119909;27121551;27121835;27124854;27129191;27129717;27130294;27131170;27132474;27133216	27120015;27121741;27121997;27125003;27129351;27129893;27130435;27131357;27132615;27133660	+;+;+;+;+;+;+;+;+;+	1866	263	759	1151	921	308	349	148	170	1445	1368	537	1352	1339	1581
ENSMUST00000003115	Cdkn1b	6;6;6	134920401;134921956;134924243	134921394;134922083;134925513	+;+;+	2393	0	0	0	0	0	0	0	0	0	0	0	0	0	0
ENSMUST00000003117	Ap1m1	8;8;8;8;8;8;8;8;8;8;8;8	72240018;72246639;72249113;72249749;72250681;72251743;72252835;72253209;72253475;72255697;72256107;72256735	72240243;72246795;72249180;72249879;72250828;72251869;72252977;72253280;72253633;72255822;72256182;72257385	+;+;+;+;+;+;+;+;+;+;+;+	2084	131	114	163	141	146	129	47	57	431	391	153	436	396	522
ENSMUST00000003121	Rab8a	8;8;8;8;8;8;8;8	72161200;72168427;72171240;72174526;72175840;72176323;72177620;72180045	72161482;72168487;72171300;72174603;72175929;72176388;72177670;72183904	+;+;+;+;+;+;+;+	4550	606	556	735	453	597	614	299	322	1300	1010	286	956	1040	1356
ENSMUST00000003123	Fam32a	8;8;8;8	72219730;72219941;72221928;72222182	72219860;72220082;72221981;72223764	+;+;+;+	1910	761	648	895	500	677	685	317	355	1934	1636	598	1413	1486	1666
ENSMUST00000003135	Elf3	1;1;1;1;1;1;1;1;1	135253575;135254925;135255975;135256234;135256471;135256779;135257005;135257615;135258349	135254380;135255120;135256091;135256323;135256590;135256874;135257286;135257782;135258568	-;-;-;-;-;-;-;-;-	2095	0	0	0	0	0	0	0	0	0	1	0	0	0	0
ENSMUST00000003137	Cyp2c29	19;19;19;19;19;19;19;19;19	39287074;39290729;39291057;39307608;39309655;39321551;39324906;39329104;39330252	39287285;39290891;39291206;39307768;39309831;39321692;39325093;39329245;39330699	+;+;+;+;+;+;+;+;+	1783	0	0	0	0	0	0	0	0	0	0	0	0	0	0
ENSMUST00000003152	Stk11	10;10;10;10;10;10;10;10;10;10	80115803;80124802;80125479;80126033;80126233;80126654;80127045;80127904;80129905;80130256	80116907;80124885;80125568;80126165;80126369;80126781;80127102;80128100;80130111;80130682	+;+;+;+;+;+;+;+;+;+	2566	0	0	0	0	0	0	0	0	0	0	0	0	0	0
ENSMUST00000003154	Efna2	10;10;10;10	80179482;80186752;80188442;80188669	80179890;80187065;80188507;80190010	+;+;+;+	2131	65	56	86	58	80	78	33	20	210	241	175	215	189	358
ENSMUST00000003156	Atp5d	10;10;10;10	80142315;80143832;80145219;80145423	80142606;80143985;80145307;80145818	+;+;+;+	931	0	0	0	0	0	0	0	0	0	0	0	0	0	0
ENSMUST00000003183	Ppp5c	7;7;7;7;7;7;7;7;7;7;7;7;7	17004640;17005261;17006060;17006332;17006907;17007104;17007726;17008614;17008993;17009875;17015398;17022415;17027693	17005171;17005342;17006238;17006372;17006994;17007246;17007831;17008712;17009058;17009996;17015545;17022656;17027916	-;-;-;-;-;-;-;-;-;-;-;-;-	2072	1	2	4	2	3	4	1	0	42	39	38	47	44	44
ENSMUST00000003191	Prkd3	17;17;17;17;17;17;17;17;17;17;17;17;17;17;17;17;17;17	78949405;78952677;78954474;78956522;78957142;78959032;78961111;78962527;78966175;78968040;78971360;78972403;78974735;78975375;78981774;78983526;78985215;79012624	78952030;78952762;78954741;78956620;78957303;78959138;78961183;78962576;78966451;78968117;78971483;78972586;78974812;78975567;78981931;78983657;78985353;79013306	-;-;-;-;-;-;-;-;-;-;-;-;-;-;-;-;-;-	5517	0	0	0	0	0	0	0	0	0	0	0	0	0	0
ENSMUST00000003203	Cdk12	11;11;11;11;11;11;11;11;11;11;11;11;11	98203314;98210361;98219074;98221014;98222628;98224442;98230113;98230984;98236705;98240779;98241698;98243361;98245217	98204410;98211236;98219250;98221153;98222798;98224631;98230169;98231085;98236782;98240895;98241829;98243572;98246704	+;+;+;+;+;+;+;+;+;+;+;+;+	4837	0	0	1	0	2	0	0	0	1	2	3	7	6	8
ENSMUST00000003207	Lipe	7;7;7;7;7;7;7;7;7;7	25379527;25380526;25383151;25383453;25384373;25384780;25385180;25385437;25388118;25395501	25380173;25380956;25383327;25383680;25384664;25384965;25385325;25385527;25388653;25395987	-;-;-;-;-;-;-;-;-;-	3221	11	7	22	10	12	9	7	2	2	2	1	0	0	5
ENSMUST00000003219	Cnot11	1;1;1;1;1;1;1	39535802;39537416;39538271;39539873;39542400;39544892;39545069	39536337;39537580;39538423;39540075;39542602;39544988;39546873	+;+;+;+;+;+;+	3162	0	0	0	0	0	0	0	0	0	0	0	0	0	0
ENSMUST00000003238	Foxj2	6;6;6;6;6;6;6;6;6;6;6	122819914;122828157;122831436;122832938;122833161;122833681;122837821;122838584;122839461;122840226;122842764	122820970;122828503;122831510;122833006;122833301;122833876;122838204;122838685;122839670;122840324;122845366	+;+;+;+;+;+;+;+;+;+;+	5283	24	21	17	19	19	11	6	5	0	0	0	0	0	1
ENSMUST00000003245	Sri	5;5;5;5;5;5	8059342;8062384;8063260;8063637;8064558;8067533	8059422;8062427;8063407;8063750;8064616;8067726	+;+;+;+;+;+	640	0	0	0	0	0	0	0	0	0	0	0	0	0	0
ENSMUST00000003268	Sh3gl1	17;17;17;17;17;17;17;17;17;17	56016753;56017844;56017983;56018575;56018804;56019040;56019316;56019926;56020123;56036415	56017736;56017900;56018107;56018678;56018962;56019173;56019459;56019998;56020191;56036637	-;-;-;-;-;-;-;-;-;-	2072	633	576	797	526	682	675	244	331	761	542	83	523	411	971
ENSMUST00000003274	Ebi3	17;17;17;17;17	55952623;55953889;55954303;55956185;55956622	55952928;55954018;55954481;55956339;55957021	+;+;+;+;+	1170	20	22	42	13	24	11	9	8	102	72	47	50	64	49
ENSMUST00000003284	Irf3	7;7;7;7;7;7;7;7	44997648;44998705;44999892;45000154;45000372;45000645;45001673;45002164	44997908;44998877;45000063;45000224;45000546;45001022;45001788;45002848	+;+;+;+;+;+;+;+	2031	5	2	1	1	0	0	0	0	7	5	3	2	1	4
ENSMUST00000003290	Bcl2l12	7;7;7;7;7;7;7	44991222;44992744;44994180;44994363;44996544;44996878;44997463	44991454;44993031;44994271;44994449;44996686;44996992;44997579	-;-;-;-;-;-;-	1075	0	0	0	0	0	0	0	0	0	0	0	0	0	0
ENSMUST00000003310	Ranbp2	10;10;10;10;10;10;10;10;10;10;10;10;10;10;10;10;10;10;10;10;10;10;10;10;10;10;10;10;10	58446852;58451984;58453312;58454573;58455219;58455809;58457592;58460518;58461836;58463819;58464083;58464405;58465065;58465444;58465663;58467115;58467390;58470627;58475244;58476157;58483029;58483897;58484442;58485680;58488573;58490610;58492411;58492802;58493663	58447051;58452051;58453423;58454725;58455449;58455954;58457784;58460605;58462045;58464000;58464258;58464528;58465226;58465581;58465809;58467294;58467473;58470762;58475338;58480819;58483199;58483983;58484620;58485881;58488674;58490755;58492684;58493136;58494155	+;+;+;+;+;+;+;+;+;+;+;+;+;+;+;+;+;+;+;+;+;+;+;+;+;+;+;+;+	9477	1131	901	1066	689	958	1168	647	654	3235	3100	742	2826	2565	3700
ENSMUST00000003312	Edar	10;10;10;10;10;10;10;10;10;10;10;10	58600789;58606045;58607340;58609938;58610274;58610447;58611957;58621313;58628460;58629366;58630064;58675456	58603184;58606105;58607499;58610010;58610348;58610572;58612043;58621398;58628641;58629488;58630132;58675654	-;-;-;-;-;-;-;-;-;-;-;-	3637	0	13	18	0	12	3	1	7	11	17	21	7	12	10
ENSMUST00000003313	Grk5	19;19;19;19;19;19;19;19;19;19;19;19;19;19;19;19	60889749;60987702;61031752;61046077;61068548;61069304;61072434;61073389;61076638;61079337;61080854;61083061;61086072;61089911;61090508;61091894	60890631;60987797;61031864;61046154;61068648;61069396;61072497;61073529;61076828;61079374;61080943;61083269;61086209;61090048;61090639;61092553	+;+;+;+;+;+;+;+;+;+;+;+;+;+;+;+	3165	224	178	226	127	179	150	52	76	190	167	85	160	158	263
ENSMUST00000003318	Dvl3	16;16;16;16;16;16;16;16;16;16;16;16;16;16;16	20516982;20522256;20523410;20523652;20523940;20524252;20524519;20525639;20525906;20526089;20526267;20526949;20527252;20530777;20531080	20517355;20522325;20523531;20523761;20524075;20524345;20524588;20525778;20525982;20526156;20526416;20527080;20527419;20530992;20531650	+;+;+;+;+;+;+;+;+;+;+;+;+;+;+	2498	1	1	2	2	2	2	0	0	1	0	1	1	0	3
ENSMUST00000003319	Abcf3	16;16;16;16;16;16;16;16;16;16;16;16;16;16;16;16;16;16;16;16;16	20548577;20548966;20549235;20549744;20550004;20550202;20550421;20551474;20551644;20551806;20551962;20552099;20552259;20552554;20558560;20558697;20559291;20559641;20559915;20560183;20560357	20548745;20549113;20549314;20549790;20550101;20550324;20550687;20551554;20551703;20551862;20551984;20552154;20552459;20552630;20558604;20558829;20559379;20559732;20560047;20560270;20561379	+;+;+;+;+;+;+;+;+;+;+;+;+;+;+;+;+;+;+;+;+	3090	101	103	124	71	92	116	41	41	266	250	156	180	206	286
ENSMUST00000003320	Eif2b5	16;16;16;16;16;16;16;16;16;16;16;16;16;16;16;16	20498817;20500185;20501364;20501630;20501904;20502243;20502530;20504645;20505199;20505462;20506128;20506381;20507008;20508028;20508709;20508961	20499096;20500309;20501549;20501807;20501984;20502320;20502842;20504790;20505340;20505563;20506235;20506471;20507131;20508153;20508819;20509955	+;+;+;+;+;+;+;+;+;+;+;+;+;+;+;+	3186	402	362	439	288	389	355	149	148	707	510	4	477	431	811
ENSMUST00000003345	Amph	13;13;13;13;13;13;13;13;13;13;13;13;13;13;13;13;13;13;13;13;13	18948371;19045953;19077331;19084205;19086523;19094753;19096007;19099893;19100572;19102872;19104231;19113103;19116237;19118152;19120596;19121275;19125026;19137536;19139172;19141965;19149736	18948501;19046033;19077385;19084299;19086618;19094860;19096092;19099968;19100654;19103010;19104359;19113219;19116260;19118175;19120628;19121319;19125148;19137742;19139432;19142066;19150913	+;+;+;+;+;+;+;+;+;+;+;+;+;+;+;+;+;+;+;+;+	3193	798	606	837	618	804	877	289	301	1676	1442	197	1259	1185	1734
ENSMUST00000003351	Grin2c	11;11;11;11;11;11;11;11;11;11;11;11;11	115249169;115251009;115252583;115253208;115253698;115254053;115255273;115255686;115256043;115257337;115257773;115260734;115265288	115250707;115251241;115252770;115253368;115253927;115254178;115255426;115255851;115256254;115257451;115258371;115261147;115265429	-;-;-;-;-;-;-;-;-;-;-;-;-	4279	0	0	0	0	0	0	0	0	0	0	0	0	0	0
ENSMUST00000003360	Car11	7;7;7;7;7;7;7;7;7	45699843;45700426;45701224;45702434;45702833;45703062;45703459;45703713;45704489	45700339;45700500;45701366;45702619;45702928;45703134;45703613;45703878;45704682	+;+;+;+;+;+;+;+;+	1585	149	148	192	116	155	218	91	70	325	357	190	232	257	237
ENSMUST00000003369	Plag1	4;4;4;4;4;4	3900996;3905447;3908906;3912420;3915621;3938214	3904947;3905805;3909002;3912511;3915725;3938382	-;-;-;-;-;-	4774	34	24	20	16	33	25	25	15	42	28	7	30	22	66
ENSMUST00000003370	Hck	2;2;2;2;2;2;2;2;2;2;2;2;2	153108468;153124170;153128263;153129043;153129844;153131221;153134069;153134624;153136698;153138262;153144419;153148947;153150947	153108754;153124287;153128305;153129142;153129942;153131324;153134218;153134776;153136877;153138338;153144572;153149078;153151441	+;+;+;+;+;+;+;+;+;+;+;+;+	2092	0	0	0	0	0	0	0	0	0	0	0	0	0	0
ENSMUST00000003386	Mrpl4	9;9;9;9;9;9;9;9;9	21002737;21003084;21003254;21006134;21006827;21007434;21007631;21007823;21008494	21002997;21003150;21003404;21006185;21006944;21007540;21007740;21007899;21008835	+;+;+;+;+;+;+;+;+	1285	464	391	597	379	493	534	231	208	881	783	86	677	732	989
ENSMUST00000003395	Pde4a	9;9;9;9;9;9;9;9;9;9	21196705;21198593;21201221;21203198;21203388;21204324;21204970;21205291;21206145;21210694	21197178;21198686;21201417;21203296;21203552;21204423;21205124;21205413;21206327;21211627	+;+;+;+;+;+;+;+;+;+	2524	16	12	10	11	18	12	3	0	0	0	1	0	0	0
ENSMUST00000003397	Ap1m2	9;9;9;9;9;9;9;9;9;9;9	21295457;21296433;21298200;21299279;21302456;21302623;21305282;21305493;21309367;21309636;21312207	21295854;21296508;21298325;21299437;21302527;21302765;21305408;21305771;21309434;21309792;21312333	-;-;-;-;-;-;-;-;-;-;-	1732	0	0	0	0	0	0	0	0	0	0	0	0	0	0
ENSMUST00000003404	Glg1	8;8;8;8;8;8;8;8;8;8;8;8;8;8;8;8;8;8;8;8;8;8;8;8;8	111157898;111159799;111160621;111161426;111162367;111162638;111163771;111165557;111168661;111169488;111171230;111172415;111173202;111174234;111177645;111178833;111180935;111182531;111187714;111188667;111191190;111192524;111197593;111200136;111258771	111158061;111159905;111160741;111161533;111162468;111162780;111163894;111165694;111168753;111169605;111171318;111172528;111173264;111174320;111177782;111178986;111181036;111182652;111187928;111188850;111191261;111192727;111197808;111200222;111259216	-;-;-;-;-;-;-;-;-;-;-;-;-;-;-;-;-;-;-;-;-;-;-;-;-	3511	0	0	0	0	0	0	0	0	0	0	0	0	0	0
ENSMUST00000003413	Cyp4f39	17;17;17;17;17;17;17;17;17;17;17;17	32468462;32470804;32481074;32481780;32482087;32483205;32486770;32486946;32489620;32491143;32491807;32492302	32468683;32470948;32481127;32481907;32482211;32483472;32486836;32487075;32489753;32491207;32491889;32492479	+;+;+;+;+;+;+;+;+;+;+;+	1599	1	3	9	5	2	2	6	1	2	2	0	6	6	12
ENSMUST00000003416	Cyp4f16	17;17;17;17;17;17;17;17;17;17;17;17;17	32536569;32536998;32540271;32542738;32542877;32544108;32544883;32546369;32546630;32550253;32550503;32550732;32551056	32536655;32537196;32540415;32542791;32543004;32544229;32545153;32546435;32546759;32550386;32550567;32550814;32551797	+;+;+;+;+;+;+;+;+;+;+;+;+	2227	0	0	0	0	0	0	0	0	0	0	0	0	0	0
ENSMUST00000003433	Mknk2	10;10;10;10;10;10;10;10;10;10;10;10	80665332;80667613;80667966;80668522;80668945;80669155;80669298;80669630;80669896;80671559;80671736;80671928	80667332;80667656;80668130;80668716;80669040;80669210;80669402;80669703;80669975;80671656;80671837;80671976	-;-;-;-;-;-;-;-;-;-;-;-	3065	745	921	1215	607	937	767	285	288	1267	1288	532	1313	989	1702
ENSMUST00000003434	Btbd2	10;10;10;10;10;10;10;10;10	80642617;80643826;80644262;80644603;80645340;80646381;80647705;80648560;80656130	80643691;80643972;80644349;80644795;80645537;80646486;80647861;80648679;80657071	-;-;-;-;-;-;-;-;-	3026	0	10	9	1	2	6	6	0	2	0	1	0	0	2
ENSMUST00000003436	Abhd17a	10;10;10;10;10	80583654;80584143;80585608;80586515;80590175	80584063;80584322;80585802;80587030;80590341	-;-;-;-;-	1468	0	0	0	0	0	0	0	0	1	0	0	0	0	0
ENSMUST00000003438	Mob3a	10;10;10;10	80685256;80689852;80691069;80701797	80687173;80690054;80691567;80701820	-;-;-;-	2644	22	44	60	13	20	25	10	10	6	8	0	5	4	22
ENSMUST00000003442	Cacnb3	15;15;15;15;15;15;15;15;15;15;15;15;15	98634764;98639488;98639814;98640339;98640686;98640959;98641177;98641400;98641616;98641939;98642309;98642502;98643257	98635213;98639610;98639936;98640454;98640750;98640978;98641257;98641458;98641725;98642090;98642404;98642651;98644530	+;+;+;+;+;+;+;+;+;+;+;+;+	2819	23	21	31	16	29	26	7	4	4	1	1	3	0	8
ENSMUST00000003444	Ccdc65	15;15;15;15;15;15;15;15	98708207;98709055;98717424;98718712;98720584;98720958;98722518;98722814	98708536;98709222;98717593;98718850;98720781;98721176;98722670;98723326	+;+;+;+;+;+;+;+	1890	989	796	937	677	907	893	346	468	2100	1848	397	1719	1661	2109
ENSMUST00000003445	Fkbp11	15;15;15;15;15;15	98724373;98726484;98726900;98727211;98727683;98727957	98724602;98726554;98726933;98727298;98727748;98728198	-;-;-;-;-;-	731	6	10	20	5	15	7	0	5	30	45	51	33	37	41
ENSMUST00000003450	Ddx23	15;15;15;15;15;15;15;15;15;15;15;15;15;15;15;15;15	98645134;98646344;98647163;98647474;98648487;98649715;98650144;98650593;98650913;98651244;98651465;98651918;98652473;98652888;98656602;98658230;98662823	98646017;98646518;98647271;98647625;98648729;98649892;98650289;98650818;98651056;98651356;98651598;98652056;98652538;98652981;98656712;98658435;98662889	-;-;-;-;-;-;-;-;-;-;-;-;-;-;-;-;-	3187	355	353	382	247	318	360	117	109	1370	1306	758	1159	1146	1379
ENSMUST00000003451	Rnd1	15;15;15;15;15	98669205;98672511;98673846;98676487;98677230	98670842;98672645;98673955;98676574;98677461	-;-;-;-;-	2203	7	9	10	1	6	4	3	0	27	29	31	25	20	33
ENSMUST00000003459	Myo1g	11;11;11;11;11;11;11;11;11;11;11;11;11;11;11;11;11;11;11;11;11;11	6506548;6506907;6507869;6508190;6509325;6510148;6510868;6511483;6512161;6512463;6514467;6514752;6515094;6515849;6516079;6516748;6517087;6517570;6517852;6518734;6518979;6520742	6506832;6507061;6507982;6508294;6509469;6510371;6511075;6511649;6512293;6512537;6514537;6514922;6515208;6515994;6516303;6516864;6517197;6517623;6518017;6518827;6519187;6520958	-;-;-;-;-;-;-;-;-;-;-;-;-;-;-;-;-;-;-;-;-;-	3307	0	0	0	0	0	0	0	0	0	3	3	3	2	3
ENSMUST00000003461	Ogdh	11;11;11;11;11;11;11;11;11;11;11;11;11;11;11;11;11;11;11;11;11;11;11	6291633;6296952;6313788;6316978;6334533;6338558;6339109;6339838;6340443;6342495;6346515;6347098;6347829;6348235;6348658;6349100;6349315;6349842;6350606;6352126;6354929;6355291;6355554	6291693;6297199;6313979;6317080;6334648;6338712;6339255;6339928;6340622;6342623;6346694;6347250;6347931;6348363;6348808;6349227;6349493;6349913;6350734;6352198;6355092;6355445;6356642	+;+;+;+;+;+;+;+;+;+;+;+;+;+;+;+;+;+;+;+;+;+;+	4127	8	8	5	3	10	10	5	4	19	15	3	11	15	29
ENSMUST00000003468	Grik5	7;7;7;7;7;7;7;7;7;7;7;7;7;7;7;7;7;7;7;7	25009853;25013586;25013790;25015305;25015808;25022441;25022986;25023283;25046174;25058284;25058494;25058941;25060470;25060730;25062878;25065129;25065373;25068010;25068444;25072040	25010794;25013707;25013918;25015530;25015973;25022614;25023095;25023396;25046377;25058391;25058598;25059093;25060631;25060783;25063056;25065294;25065470;25068174;25068572;25072369	-;-;-;-;-;-;-;-;-;-;-;-;-;-;-;-;-;-;-;-	3836	917	688	841	560	698	701	232	142	1219	873	506	709	815	849
ENSMUST00000003469	Cd79a	7;7;7;7;7	24897381;24899095;24899587;24901233;24901431	24897588;24899388;24899705;24901301;24902197	+;+;+;+;+	1457	5	33	187	7	8	16	4	3	17	24	2	23	19	29
ENSMUST00000003493	Prkcsh	9;9;9;9;9;9;9;9;9;9;9;9;9;9;9;9;9;9	22003035;22003399;22003677;22004498;22004691;22006540;22008244;22010157;22010524;22011167;22011438;22011674;22012034;22012219;22012679;22012836;22013016;22013912	22003088;22003537;22003793;22004593;22004748;22006657;22008373;22010241;22010602;22011253;22011575;22011770;22012103;22012308;22012753;22012935;22013166;22014219	+;+;+;+;+;+;+;+;+;+;+;+;+;+;+;+;+;+	1992	0	0	0	0	0	0	0	0	0	0	0	0	0	0
ENSMUST00000003501	Elavl3	9;9;9;9;9;9;9	22015005;22024674;22026173;22026508;22036312;22036641;22051590	22018854;22024712;22026398;22026661;22036415;22036860;22052023	-;-;-;-;-;-;-	5027	4814	4227	5043	3739	4672	4238	2511	2257	6947	6509	2740	6144	6311	6774
ENSMUST00000003502	Rab3b	4;4;4;4	108890290;108923906;108929402;108940626	108890535;108924024;108929526;108941188	+;+;+;+	1053	0	0	0	0	0	0	0	0	0	0	0	0	0	0
ENSMUST00000003509	St8sia6	2;2;2;2;2;2;2;2	13651020;13665420;13668785;13672483;13696828;13723443;13792754;13793344	13657290;13665512;13668897;13672627;13696914;13723532;13792852;13793808	-;-;-;-;-;-;-;-	7363	6	41	82	46	21	8	9	9	303	389	44	396	278	534
ENSMUST00000003512	Fcgrt	7;7;7;7;7;7;7	45092993;45093782;45095160;45101910;45102414;45103003;45103640	45093355;45093898;45095429;45102185;45102671;45103273;45103822	-;-;-;-;-;-;-	1738	23	116	192	80	37	36	19	15	341	278	291	234	359	330
ENSMUST00000003513	Nosip	7;7;7;7;7;7;7;7;7	45062429;45073490;45073982;45074606;45076069;45076310;45076552;45076821;45077312	45062531;45073564;45074087;45074687;45076228;45076428;45076739;45076929;45078503	+;+;+;+;+;+;+;+;+	2134	5	6	2	6	8	6	0	1	34	27	37	24	26	35
ENSMUST00000003521	Rps11	7;7;7;7;7	45122388;45122829;45123163;45123419;45124297	45122558;45122958;45123238;45123550;45124389	-;-;-;-;-	602	592	615	681	511	569	589	409	423	748	739	399	721	728	740
ENSMUST00000003527	Supt5	7;7;7;7;7;7;7;7;7;7;7;7;7;7;7;7;7;7;7;7;7;7;7;7;7;7;7;7;7;7	28314898;28315349;28315723;28316009;28316283;28316784;28316986;28317216;28317393;28317737;28318739;28318955;28319967;28320220;28322003;28322220;28322464;28323726;28323893;28325950;28328703;28329020;28329259;28329416;28329583;28330018;28330580;28331370;28338352;28338695	28315270;28315444;28315926;28316177;28316441;28316889;28317113;28317318;28317500;28317821;28318864;28319101;28320113;28320375;28322139;28322313;28322569;28323796;28323982;28326201;28328771;28329050;28329324;28329484;28329652;28330029;28330645;28331529;28338435;28338719	-;-;-;-;-;-;-;-;-;-;-;-;-;-;-;-;-;-;-;-;-;-;-;-;-;-;-;-;-;-	3509	2388	2186	2536	1868	2484	2514	1146	952	1537	1227	655	1139	1138	1715
ENSMUST00000003529	Paf1	7;7;7;7;7;7;7;7;7;7;7;7;7;7	28392951;28393669;28395043;28395418;28395629;28395771;28395952;28396134;28396284;28396610;28396821;28398448;28398659;28398826	28393254;28393698;28395135;28395539;28395695;28395872;28396057;28396202;28396387;28396726;28396949;28398553;28398749;28399388	+;+;+;+;+;+;+;+;+;+;+;+;+;+	2003	2	1	1	0	0	0	0	0	1	3	1	1	2	0
ENSMUST00000003536	Med29	7;7;7;7	28386146;28390812;28391090;28392451	28387024;28390896;28391148;28392708	-;-;-;-	1281	82	72	112	74	74	93	26	36	214	176	55	169	152	244
ENSMUST00000003544	Bicd1	6;6;6;6;6;6;6;6;6;6	149409429;149483984;149494560;149511692;149512796;149516933;149518906;149520353;149550350;149556644	149409641;149484196;149494712;149512117;149513890;149517084;149519223;149520546;149550425;149556731	+;+;+;+;+;+;+;+;+;+	2928	0	0	0	0	0	0	0	0	0	0	0	0	1	0
ENSMUST00000003550	Ncstn	1;1;1;1;1;1;1;1;1;1;1;1;1;1;1;1;1	172066013;172067331;172067789;172068186;172068562;172068762;172069976;172071251;172071465;172072121;172072466;172072777;172074273;172074915;172075405;172081212;172082601	172066796;172067543;172067943;172068273;172068657;172068864;172070148;172071328;172071569;172072273;172072575;172072927;172074418;172075036;172075528;172081316;172082795	-;-;-;-;-;-;-;-;-;-;-;-;-;-;-;-;-	2901	0	0	0	0	0	0	0	0	0	0	0	0	0	0
ENSMUST00000003554	Casq1	1;1;1;1;1;1;1;1;1;1;1	172209894;172211948;172213028;172213337;172213806;172215012;172215477;172215909;172216794;172217890;172219412	172210503;172212022;172213128;172213391;172213851;172215142;172215550;172216020;172216894;172217974;172219868	-;-;-;-;-;-;-;-;-;-;-	1847	0	0	0	0	0	0	0	0	3	2	0	0	1	1
ENSMUST00000003561	Phyhip	14;14;14;14;14	70457476;70461739;70463240;70465450;70466801	70457803;70461923;70463414;70465567;70468832	+;+;+;+;+	2838	322	275	335	197	303	301	95	90	1073	865	55	749	689	877
ENSMUST00000003568	Crhr2	6;6;6;6;6;6;6;6;6;6;6;6;6	55090049;55092513;55092952;55093279;55099212;55100063;55100622;55102751;55103168;55104724;55117414;55123683;55132770	55091418;55092554;55093087;55093364;55099284;55100123;55100775;55102868;55103274;55104809;55117539;55123773;55133014	-;-;-;-;-;-;-;-;-;-;-;-;-	2695	0	0	0	0	0	0	0	0	0	1	0	0	0	0
ENSMUST00000003569	Inmt	6;6;6	55170626;55173286;55174827	55171277;55173493;55175043	-;-;-	1077	97	52	129	71	114	100	50	33	584	634	358	605	727	574
ENSMUST00000003572	Gars	6;6;6;6;6;6;6;6;6;6;6;6;6;6;6;6;6	55038001;55046414;55048067;55050320;55052176;55053129;55055750;55060909;55063091;55065448;55068061;55069341;55073339;55075382;55076955;55077583;55079220	55038233;55046515;55048169;55050461;55052264;55053205;55055895;55061058;55063253;55065612;55068168;55069486;55073424;55075491;55077048;55077773;55079504	+;+;+;+;+;+;+;+;+;+;+;+;+;+;+;+;+	2390	1192	1051	1339	988	1225	1182	533	622	2637	2400	587	2296	2094	2839
ENSMUST00000003574	Cyp4f18	8;8;8;8;8;8;8;8;8;8;8;8;8	71988482;71989060;71989707;71989861;71992832;71993165;71995886;71998174;72000875;72001088;72002388;72009044;72009579	71988737;71989142;71989771;71989994;71992961;71993231;71996156;71998295;72001002;72001141;72002532;72009242;72009626	-;-;-;-;-;-;-;-;-;-;-;-;-	1702	2	33	87	3	2	3	0	7	6	4	0	3	7	6
ENSMUST00000003575	Tpm4	8;8;8;8;8;8;8;8	72135259;72138588;72143450;72144678;72146452;72147057;72147198;72151742	72135453;72138721;72143567;72144748;72146527;72147119;72147267;72153142	+;+;+;+;+;+;+;+	2128	115	355	466	122	146	116	72	77	702	850	194	692	756	1006
ENSMUST00000003597	Psg18	7;7;7;7;7	18345808;18349082;18350746;18353305;18354754	18346127;18349441;18351105;18353667;18355009	-;-;-;-;-	1659	0	0	0	0	0	0	0	0	0	0	0	0	0	0
ENSMUST00000003599	Pcdhgb6	18;18;18;18	37742094;37825021;37833265;37839903	37744658;37825079;37833353;37841873	+;+;+;+	4684	123	65	82	52	88	97	53	23	10	6	9	8	6	37
ENSMUST00000003612	Dusp3	11;11;11	101971143;101981617;101984612	101974939;101981843;101984799	-;-;-	4212	0	0	0	0	0	0	0	0	0	0	0	0	0	1
ENSMUST00000003620	Prodh	16;16;16;16;16;16;16;16;16;16;16;16;16;16	18071726;18072450;18073555;18076242;18077444;18077791;18079187;18079912;18080166;18080463;18080926;18081531;18084547;18088888	18072363;18072538;18073653;18076417;18077590;18077883;18079268;18079991;18080282;18080527;18081075;18081565;18084755;18089292	-;-;-;-;-;-;-;-;-;-;-;-;-;-	2385	0	0	0	0	0	0	0	0	0	2	0	1	0	2
ENSMUST00000003621	Ess2	16;16;16;16;16;16;16;16;16;16	17900711;17902818;17905002;17906271;17907109;17907520;17907750;17909905;17910088;17911162	17902323;17902933;17905111;17906373;17907242;17907637;17907922;17910000;17910256;17911348	-;-;-;-;-;-;-;-;-;-	2819	420	388	552	312	444	498	172	163	986	824	379	696	729	1119
ENSMUST00000003622	Slc25a1	16;16;16;16;16;16;16;16;16	17925211;17926030;17926189;17926435;17926656;17927154;17927367;17927545;17927986	17925927;17926103;17926304;17926539;17926740;17927292;17927466;17927652;17928219	-;-;-;-;-;-;-;-;-	1678	34	40	72	35	40	50	15	23	244	209	241	225	260	214
ENSMUST00000003628	Ddr1	17;17;17;17;17;17;17;17;17;17;17;17;17;17;17;17;17;17	35681570;35682624;35683437;35684095;35684995;35685306;35686481;35687145;35688539;35688786;35689667;35689994;35691128;35691447;35692856;35693592;35693788;35703924	35682518;35682773;35683671;35684313;35685122;35685550;35686591;35687310;35688690;35688869;35689913;35690180;35691230;35691594;35693084;35693694;35693917;35704139	-;-;-;-;-;-;-;-;-;-;-;-;-;-;-;-;-;-	3802	0	0	0	0	0	0	0	0	0	0	0	0	0	0
ENSMUST00000003635	Ier3	17;17	35821684;35822038	35821928;35822923	+;+	1131	5	34	72	32	13	13	5	5	213	472	242	287	294	311
ENSMUST00000003640	Fosb	7;7;7;7	19302721;19306559;19307120;19309306	19305302;19306666;19307440;19310045	-;-;-;-	3751	32	24	90	58	21	22	15	28	88	367	173	76	131	207
ENSMUST00000003642	Klc4	17;17;17;17;17;17;17;17;17;17;17;17;17;17;17;17	46630631;46631828;46632033;46632750;46635410;46635732;46635976;46636193;46636620;46636913;46639395;46639891;46640623;46642114;46644249;46645081	46631073;46631891;46632148;46632890;46635518;46635802;46636028;46636292;46636793;46637014;46639482;46640110;46640704;46642344;46644512;46645144	-;-;-;-;-;-;-;-;-;-;-;-;-;-;-;-	2322	846	682	849	548	812	862	282	318	1649	1407	313	1240	1202	1678
ENSMUST00000003643	Ckm	7;7;7;7;7;7;7;7	19411094;19414119;19414897;19415401;19416719;19419439;19420107;19421208	19411146;19414330;19415051;19415533;19416890;19419562;19420296;19421583	+;+;+;+;+;+;+;+	1415	6	1	2	4	3	4	0	0	4	8	2	4	6	7
ENSMUST00000003645	Ercc1	7;7;7;7;7;7;7;7;7;7	19344778;19345606;19348401;19350161;19350693;19352629;19354326;19355101;19355293;19356419	19345196;19345717;19348616;19350264;19350792;19352705;19354425;19355172;19355361;19356524	+;+;+;+;+;+;+;+;+;+	1375	0	0	0	0	0	4	0	0	1	2	1	4	1	1
ENSMUST00000003655	As3mt	19;19;19;19;19;19;19;19;19;19;19	46707443;46707756;46708070;46708968;46709547;46712221;46715189;46719889;46720314;46724904;46740461	46707536;46707799;46708197;46709118;46709683;46712290;46715270;46720020;46720456;46725038;46741095	+;+;+;+;+;+;+;+;+;+;+	1751	147	145	206	94	120	137	40	54	510	517	148	344	400	459
ENSMUST00000003659	Comp	8;8;8;8;8;8;8;8;8;8;8;8;8;8;8;8;8;8;8	70373548;70373853;70374373;70374805;70375730;70376042;70376197;70376438;70376636;70377097;70378614;70378898;70379034;70379394;70379681;70380105;70381245;70381672;70381886	70373647;70373938;70374424;70374974;70375867;70376116;70376355;70376542;70376743;70377256;70378732;70378950;70379215;70379572;70379729;70380301;70381417;70381811;70382065	+;+;+;+;+;+;+;+;+;+;+;+;+;+;+;+;+;+;+	2425	2	14	53	8	5	19	3	13	67	50	195	66	94	108
ENSMUST00000003669	Homer3	8;8;8;8;8;8;8;8;8	70285246;70285394;70285931;70289394;70290052;70291007;70291318;70291517;70292975	70285315;70285550;70286062;70289501;70290173;70291163;70291428;70291603;70294353	+;+;+;+;+;+;+;+;+	2323	0	0	0	0	0	0	0	0	0	0	0	0	0	0
ENSMUST00000003677	Rnf215	11;11;11;11;11;11;11;11;11	4135202;4135814;4136560;4136712;4137212;4139739;4139935;4140298;4140487	4135563;4135957;4136631;4136797;4137368;4139858;4140078;4140400;4141172	+;+;+;+;+;+;+;+;+	1874	341	238	330	217	312	260	111	109	808	619	82	639	618	712
ENSMUST00000003681	Sec14l2	11;11;11;11;11;11;11;11;11;11;11;11	4097039;4103388;4103674;4103895;4108497;4108964;4109149;4111037;4111443;4111894;4116681;4118625	4098435;4103557;4103813;4104001;4108580;4109024;4109244;4111225;4111502;4111937;4116756;4118831	-;-;-;-;-;-;-;-;-;-;-;-	2631	363	349	535	385	329	314	134	155	1074	1022	422	998	1016	1043
ENSMUST00000003687	Tgfb3	12;12;12;12;12;12;12	86056744;86058900;86062028;86063821;86069347;86069747;86077581	86057938;86059053;86062199;86063928;86069476;86069910;86079041	-;-;-;-;-;-;-	3384	23	110	134	48	40	28	23	13	264	282	83	263	249	373
ENSMUST00000003705	Aven	2;2;2;2;2;2	112492964;112514450;112625155;112627749;112629740;112630779	112493221;112514627;112625225;112627844;112630076;112634573	+;+;+;+;+;+	4735	21	23	29	24	31	33	5	17	225	228	178	174	235	259
ENSMUST00000003710	Aak1	6;6;6;6;6;6;6;6;6;6;6;6;6;6;6;6;6;6;6;6	86850053;86925014;86935430;86936942;86944357;86946104;86946861;86949542;86950781;86955104;86956259;86963993;86965477;86967269;86970991;86981296;86982542;86983812;86986264;86987204	86850215;86925132;86935538;86937084;86944478;86946185;86946993;86949645;86950860;86955258;86956572;86964225;86965634;86967373;86971086;86981397;86982643;86983922;86986374;86991864	+;+;+;+;+;+;+;+;+;+;+;+;+;+;+;+;+;+;+;+	7203	0	0	0	0	0	0	0	0	0	0	0	0	0	0
ENSMUST00000003714	Cp	3;3;3;3;3;3;3;3;3;3;3;3;3;3;3;3;3;3;3;3	19957069;19964280;19966239;19968040;19969776;19970912;19972615;19973777;19974862;19977096;19978860;19980591;19981963;19983393;19985560;19987359;19987933;19989053;20005467;20008540	19957429;19964527;19966448;19968213;19970030;19971083;19972754;19973929;19975058;19977246;19979072;19980798;19982102;19983521;19985666;19987575;19988072;19989218;20005571;20009145	+;+;+;+;+;+;+;+;+;+;+;+;+;+;+;+;+;+;+;+	4092	3	2	3	1	4	6	2	0	34	57	2	33	42	35
ENSMUST00000003717	Abcb4	5;5;5;5;5;5;5;5;5;5;5;5;5;5;5;5;5;5;5;5;5;5;5;5;5;5;5;5	8893721;8894088;8896573;8899568;8905975;8907208;8909102;8910619;8914956;8918659;8920020;8920335;8927771;8928407;8930742;8934156;8935176;8936785;8938579;8939834;8940911;8946019;8947297;8949949;8950660;8955389;8958311;8958969	8893907;8894164;8896627;8899718;8906032;8907399;8909273;8910743;8915127;8918772;8920130;8920460;8927974;8928577;8930903;8934326;8935322;8936889;8938656;8939917;8941114;8946119;8947437;8950105;8950857;8955595;8958457;8959225	+;+;+;+;+;+;+;+;+;+;+;+;+;+;+;+;+;+;+;+;+;+;+;+;+;+;+;+	4074	2	11	22	6	2	5	2	0	14	20	5	18	10	23
ENSMUST00000003720	Crot	5;5;5;5;5;5;5;5;5;5;5;5;5;5;5;5;5;5	8966033;8968647;8968870;8969048;8969916;8973586;8973945;8974133;8976008;8977455;8978198;8983689;8987768;8988104;8989606;8993506;8996452;8997104	8966972;8968766;8968963;8969126;8970039;8973716;8974052;8974216;8976109;8977580;8978291;8983797;8987892;8988285;8989730;8993641;8996547;8997324	-;-;-;-;-;-;-;-;-;-;-;-;-;-;-;-;-;-	2996	41	101	165	71	71	42	27	19	510	580	215	566	529	574
ENSMUST00000003726	Brd4	17;17;17;17;17;17;17;17;17;17;17;17;17;17;17;17;17;17;17;17	32196276;32198031;32198357;32198683;32198896;32201002;32202174;32202668;32211167;32212839;32213527;32214631;32220161;32221146;32221873;32224084;32225576;32229417;32252997;32284063	32197820;32198274;32198562;32198813;32199270;32201592;32202546;32202720;32211277;32213134;32213726;32214840;32220289;32221508;32222165;32224222;32225713;32229735;32253200;32284097	-;-;-;-;-;-;-;-;-;-;-;-;-;-;-;-;-;-;-;-	5955	0	0	0	0	0	0	0	0	0	0	0	0	0	0
ENSMUST00000003741	Rps6ka1	4;4;4;4;4;4;4;4;4;4;4;4;4;4;4;4;4;4;4;4;4;4	133847294;133848522;133850701;133850938;133851165;133860053;133860511;133860817;133861416;133863648;133864006;133865025;133865361;133865763;133866362;133867123;133869266;133869499;133871550;133871887;133880917;133887570	133848174;133848659;133850818;133851014;133851326;133860211;133860600;133860942;133861546;133863750;133864070;133865113;133865398;133865905;133866399;133867229;133869345;133869579;133871631;133872003;133880961;133887784	-;-;-;-;-;-;-;-;-;-;-;-;-;-;-;-;-;-;-;-;-;-	3085	0	0	0	0	0	0	0	0	0	0	0	0	0	0
ENSMUST00000003754	Calb2	8;8;8;8;8;8;8;8;8;8;8	110142539;110145652;110147301;110147615;110148043;110148514;110149356;110152630;110154653;110156920;110168044	110143200;110145723;110147354;110147654;110148098;110148591;110149412;110152710;110154742;110156996;110168206	-;-;-;-;-;-;-;-;-;-;-	1430	1616	1618	1828	1332	1559	1558	814	1148	2417	2446	1084	2291	2352	2464
ENSMUST00000003759	Ciao1	2;2;2;2;2;2;2	127240938;127244913;127245723;127246413;127246602;127247010;127247482	127243037;127245000;127245924;127246501;127246713;127247158;127247816	-;-;-;-;-;-;-	3075	142	108	159	105	155	171	98	85	855	818	174	620	659	1018
ENSMUST00000003762	Has1	17;17;17;17;17	17843328;17847551;17848148;17849941;17855138	17844299;17847683;17848373;17850648;17855188	-;-;-;-;-	2090	0	0	0	0	0	0	0	0	0	0	1	2	0	2
ENSMUST00000003777	Taf6l	19;19;19;19;19;19;19;19;19;19	8774529;8775390;8778087;8778513;8778851;8782001;8782356;8782544;8783304;8783835	8775290;8775518;8778219;8778733;8778925;8782095;8782406;8782694;8783390;8783999	-;-;-;-;-;-;-;-;-;-	1869	0	0	0	0	0	0	0	0	0	0	0	0	0	0
ENSMUST00000003808	Gdf15	8;8	70629393;70631333	70630174;70632095	-;-	1545	0	0	0	0	0	0	0	0	0	0	0	0	0	0
ENSMUST00000003818	Insig2	1;1;1;1;1;1	121304353;121306864;121307140;121312201;121319597;121327691	121305947;121306963;121307306;121312325;121319972;121328024	-;-;-;-;-;-	2697	110	85	133	91	139	101	48	47	967	973	406	880	942	1077
ENSMUST00000003826	Htr3a	9;9;9;9;9;9;9;9;9	48899214;48900561;48900874;48901418;48904577;48906283;48907354;48908595;48910899	48900008;48900782;48901084;48901578;48904746;48906392;48907398;48908761;48911099	-;-;-;-;-;-;-;-;-	2082	2	27	21	1	3	5	5	4	9	14	5	14	9	18
ENSMUST00000003828	Kpna6	4;4;4;4;4;4;4;4;4;4;4;4;4;4	129647484;129649198;129650684;129651588;129653438;129653842;129654288;129654865;129655430;129656308;129657389;129657768;129661306;129662400	129648179;129649376;129650811;129651713;129653516;129654005;129654387;129654953;129655561;129656402;129657488;129657860;129661439;129662479	-;-;-;-;-;-;-;-;-;-;-;-;-;-	2195	0	0	0	0	0	0	0	0	0	0	0	0	1	0
ENSMUST00000003843	Man1a	10;10;10;10;10;10;10;10;10;10;10;10;10	53904788;53907943;53919158;53920043;53925430;53933492;53934889;53977023;54014415;54025714;54030698;54074416;54075526	53907563;53908058;53919330;53920262;53925545;53933585;53935012;53977117;54014495;54025829;54030794;54075270;54075796	-;-;-;-;-;-;-;-;-;-;-;-;-	5134	1	22	31	3	9	6	1	0	64	62	12	60	56	75
ENSMUST00000003850	Itpkc	7;7;7;7;7;7;7	27207172;27212312;27212960;27214376;27216952;27219600;27227351	27208444;27212383;27213061;27214580;27217165;27219702;27228628	-;-;-;-;-;-;-	3247	289	224	311	193	234	267	74	74	774	715	141	627	647	873
ENSMUST00000003857	Shkbp1	7;7;7;7;7;7;7;7;7;7;7;7;7;7;7;7;7;7	27342133;27342646;27343243;27344640;27345173;27347002;27348332;27348534;27350492;27351696;27351980;27352595;27354372;27354726;27355214;27355401;27355573;27355871	27342544;27342760;27343421;27344736;27345328;27347172;27348448;27348621;27350607;27351886;27352070;27352756;27354452;27354784;27355287;27355446;27355626;27356019	-;-;-;-;-;-;-;-;-;-;-;-;-;-;-;-;-;-	2358	0	0	0	1	0	0	0	0	1	0	2	0	0	0
ENSMUST00000003860	Coq8b	7;7;7;7;7;7;7;7;7;7;7;7;7;7;7	27233023;27233465;27233702;27233941;27237378;27239797;27240040;27241979;27242212;27243303;27250287;27250536;27252261;27256612;27257223	27233173;27233572;27233821;27234007;27237455;27239919;27240125;27242119;27242293;27243396;27250428;27250643;27252326;27256698;27257950	+;+;+;+;+;+;+;+;+;+;+;+;+;+;+	2181	27	25	25	16	26	21	6	17	36	16	2	12	14	43
ENSMUST00000003870	Mxi1	19;19;19;19;19;19	53310506;53331351;53346451;53369542;53370190;53371573	53310973;53331483;53346480;53369656;53370361;53375810	+;+;+;+;+;+	5156	50	39	45	25	47	39	11	12	32	13	9	14	9	61
ENSMUST00000003876	Brd8	18;18;18;18;18;18;18;18;18;18;18;18;18;18;18;18;18;18;18;18;18;18	34598615;34602203;34602672;34603707;34604598;34604831;34605474;34606420;34606675;34607039;34607775;34608418;34609805;34610410;34611132;34613037;34613216;34614448;34614748;34616665;34623455;34624538	34600241;34602247;34602776;34603884;34604666;34604923;34605688;34606466;34606768;34607491;34608055;34608627;34609949;34610628;34611268;34613101;34613296;34614570;34614797;34616734;34623551;34624601	-;-;-;-;-;-;-;-;-;-;-;-;-;-;-;-;-;-;-;-;-;-	4468	0	0	0	0	0	0	0	0	0	0	0	0	0	0
ENSMUST00000003898	Ece2	16;16;16;16;16;16;16;16;16;16;16;16;16;16;16;16;16;16;16	20629828;20630352;20630781;20631097;20632532;20632748;20633050;20637661;20638660;20639172;20640615;20642275;20642473;20643346;20643623;20643853;20644068;20644341;20645060	20630047;20630438;20630910;20631312;20632656;20632894;20633115;20637849;20638802;20639286;20640725;20642373;20642550;20643449;20643733;20643920;20644258;20644436;20645915	+;+;+;+;+;+;+;+;+;+;+;+;+;+;+;+;+;+;+	3152	0	0	0	0	0	0	0	0	0	0	0	0	0	0
ENSMUST00000003906	Farsa	8;8;8;8;8;8;8;8;8;8;8;8;8	84856989;84860906;84861127;84861312;84864058;84864231;84864437;84867377;84867549;84867750;84868009;84868224;84868866	84857181;84861043;84861225;84861430;84864150;84864359;84864552;84867461;84867648;84867918;84868086;84868338;84869257	+;+;+;+;+;+;+;+;+;+;+;+;+	1826	0	0	0	0	0	0	0	0	0	0	0	0	0	0
ENSMUST00000003907	Gcdh	8;8;8;8;8;8;8;8;8;8;8	84886393;84888527;84889262;84889582;84890711;84891013;84892402;84892831;84893021;84893448;84893555	84887053;84888687;84889387;84889685;84890927;84891142;84892572;84892893;84893164;84893474;84893917	-;-;-;-;-;-;-;-;-;-;-	2167	0	0	0	0	0	0	0	0	1	0	0	1	0	2
ENSMUST00000003908	Mast2	4;4;4;4;4;4;4;4;4;4;4;4;4;4;4;4;4;4;4;4;4;4;4;4;4;4;4;4;4	116306762;116308647;116308925;116309504;116309816;116310457;116310748;116311214;116311679;116311928;116312291;116312853;116313693;116314807;116315823;116316463;116316977;116317709;116319759;116322264;116326073;116327609;116330391;116337422;116352973;116391603;116430406;116435444;116463736	116308337;116308840;116309061;116309626;116310042;116310651;116311022;116311368;116311788;116312050;116312392;116313018;116313825;116314945;116316031;116316548;116317038;116317841;116319860;116322473;116326148;116327763;116330469;116337497;116353064;116391634;116430548;116435591;116463922	-;-;-;-;-;-;-;-;-;-;-;-;-;-;-;-;-;-;-;-;-;-;-;-;-;-;-;-;-	5445	0	0	0	0	0	0	0	0	0	0	0	0	0	0
ENSMUST00000003910	Dnase2a	8;8;8;8;8;8	84908560;84908985;84909257;84909526;84909772;84910686	84908870;84909162;84909335;84909690;84909969;84911469	+;+;+;+;+;+	1715	0	0	0	0	0	0	0	0	0	0	0	0	0	0
ENSMUST00000003911	Rad23a	8;8;8;8;8;8;8;8;8	84834652;84835755;84837460;84837689;84838007;84838273;84838469;84838794;84840494	84835674;84835919;84837590;84837767;84838134;84838328;84838650;84838955;84840641	-;-;-;-;-;-;-;-;-	2074	0	0	0	0	0	0	0	0	0	0	0	0	0	0
ENSMUST00000003912	Calr	8;8;8;8;8;8;8;8;8	84841850;84842944;84844065;84844378;84844574;84844871;84845862;84846250;84846708	84842844;84843036;84844208;84844491;84844783;84844965;84846065;84846351;84846934	-;-;-;-;-;-;-;-;-	2184	341	348	432	290	330	332	264	228	811	814	468	786	813	800
ENSMUST00000003922	Syce2	8;8;8;8	84872193;84872720;84885935;84887135	84872253;84872832;84886123;84887456	+;+;+;+	685	0	0	0	0	0	0	0	0	0	0	0	0	0	0
ENSMUST00000003946	Nob1	8;8;8;8;8;8;8;8;8	107412489;107416106;107416994;107418056;107418314;107418700;107421482;107424738;107424966	107413183;107416250;107417091;107418226;107418442;107418771;107421612;107424870;107425049	-;-;-;-;-;-;-;-;-	1658	0	0	0	0	0	0	0	0	0	0	0	0	0	0
ENSMUST00000003947	Nqo1	8;8;8;8;8;8	107388225;107391045;107392122;107392641;107392848;107403066	107389124;107391146;107392235;107392771;107393012;107403206	-;-;-;-;-;-	1553	1893	1212	1656	1287	1598	1651	820	534	2653	2204	291	2120	2080	2366
ENSMUST00000003961	Ppfia3	7;7;7;7;7;7;7;7;7;7;7;7;7;7;7;7;7;7;7;7;7;7;7;7;7;7;7;7;7;7	45339127;45340189;45340575;45340918;45341069;45341687;45342326;45343553;45343741;45346732;45347424;45347728;45348242;45348462;45350069;45352087;45353519;45354697;45354867;45355159;45356138;45356310;45356541;45357759;45358788;45359267;45360060;45360536;45361565;45366659	45340017;45340260;45340746;45340986;45341244;45341784;45342501;45343579;45343803;45346932;45347505;45347821;45348369;45348625;45350291;45352274;45353663;45354776;45354929;45355290;45356221;45356444;45356687;45357980;45358862;45359341;45360224;45360637;45361819;45367019	-;-;-;-;-;-;-;-;-;-;-;-;-;-;-;-;-;-;-;-;-;-;-;-;-;-;-;-;-;-	4865	0	0	0	0	0	0	0	0	0	0	0	0	0	0
ENSMUST00000003964	Gys1	7;7;7;7;7;7;7;7;7;7;7;7;7;7;7;7	45434844;45436532;45438102;45439479;45439905;45442423;45442916;45443528;45444632;45444779;45447898;45448253;45451563;45451751;45454822;45455041	45435170;45436713;45438293;45439664;45440049;45442540;45443036;45443634;45444691;45444857;45448011;45448379;45451658;45451914;45454902;45456619	+;+;+;+;+;+;+;+;+;+;+;+;+;+;+;+	3678	30	47	85	35	25	18	19	24	410	382	371	296	313	312
ENSMUST00000003971	Lin7b	7;7;7;7;7;7	45367891;45368304;45369141;45369915;45370127;45370522	45367998;45368467;45369350;45369986;45370245;45370583	-;-;-;-;-;-	735	1	0	2	0	1	2	0	0	12	8	3	7	4	2
ENSMUST00000003981	Il7r	15;15;15;15;15;15;15;15	9506161;9508707;9510166;9511111;9512885;9516335;9525054;9529661	9508358;9508782;9510259;9511279;9513042;9516492;9525192;9529876	-;-;-;-;-;-;-;-	3208	6	13	44	5	3	4	5	0	54	86	26	49	66	68
ENSMUST00000004036	Efnb3	11;11;11;11;11	69554092;69556693;69556906;69557200;69559692	69556269;69556797;69556998;69557492;69560205	-;-;-;-;-	3183	263	210	251	180	170	144	31	63	645	538	178	366	370	486
ENSMUST00000004050	Mmd	11;11;11;11;11;11;11	90249476;90257520;90259827;90264503;90266045;90267512;90276663	90249735;90257601;90259987;90264577;90266146;90267581;90278589	+;+;+;+;+;+;+	2677	11	52	57	21	20	22	8	12	624	727	685	841	784	878
ENSMUST00000004051	Hlf	11;11;11;11	90336536;90345758;90387786;90390250	90340974;90345978;90388121;90390895	-;-;-;-	5642	17	59	132	74	27	16	15	5	895	1099	619	998	1035	1057
ENSMUST00000004054	Kpna1	16;16;16;16;16;16;16;16;16;16;16;16;16;16	35983315;36000182;36002843;36009316;36012893;36019258;36020156;36020688;36021485;36023175;36029522;36031170;36033252;36033721	35983508;36000315;36002950;36009415;36012987;36019389;36020244;36020787;36021648;36023253;36029647;36031297;36033430;36037131	+;+;+;+;+;+;+;+;+;+;+;+;+;+	5039	273	224	321	175	229	210	144	98	1880	2042	713	1757	1797	2192
ENSMUST00000004055	Dzip1	14;14;14;14;14;14;14;14;14;14;14;14;14;14;14;14;14;14;14;14;14;14	118876108;118879344;118881010;118883365;118885606;118886498;118887068;118889256;118891770;118895851;118899986;118901501;118902015;118906895;118909434;118911342;118912442;118915190;118922243;118922911;118924425;118925141	118877262;118879512;118881140;118883567;118885659;118886627;118887230;118889392;118891832;118895907;118900042;118901549;118902155;118906957;118909571;118911503;118912566;118915274;118922791;118923167;118924518;118925314	-;-;-;-;-;-;-;-;-;-;-;-;-;-;-;-;-;-;-;-;-;-	4156	3	1	0	0	0	1	0	0	0	0	0	0	0	0
ENSMUST00000004057	Fam162a	16;16;16;16;16	36043844;36046379;36049842;36052286;36071470	36044091;36046487;36049950;36052408;36071515	-;-;-;-;-	635	202	186	255	131	201	219	84	122	655	598	256	550	643	646
ENSMUST00000004072	Rpl8	15;15;15;15;15;15	76904071;76904303;76904539;76904818;76905856;76906121	76904109;76904450;76904680;76905036;76905971;76906318	+;+;+;+;+;+	862	1021	1044	1150	915	1034	1051	820	801	1397	1374	1047	1348	1384	1390
ENSMUST00000004076	Grm3	5;5;5;5;5;5	9485236;9504725;9511458;9569919;9589576;9725130	9485841;9504899;9512524;9570774;9590184;9725352	-;-;-;-;-;-	3536	1	0	1	0	0	0	0	0	0	1	1	0	2	0
ENSMUST00000004094	Ssbp2	13;13;13;13;13;13;13;13;13;13;13;13;13;13;13;13;13	91461050;91524585;91539335;91564610;91642302;91664118;91669676;91670394;91675058;91680590;91683682;91685211;91688796;91690860;91693031;91694019;91700666	91461248;91524657;91539396;91564694;91642391;91664177;91669742;91670464;91675125;91680638;91683717;91685265;91688866;91690938;91693059;91694117;91703429	+;+;+;+;+;+;+;+;+;+;+;+;+;+;+;+;+	3957	22	12	20	19	27	18	7	5	102	115	20	61	69	120
ENSMUST00000004097	Cux1	5;5;5;5;5;5;5;5;5;5;5;5;5;5;5;5;5;5;5;5;5;5;5;5	136266415;136279430;136282868;136286761;136304723;136305449;136307759;136309747;136311495;136312643;136314307;136315999;136319781;136326750;136332624;136340089;136360002;136363259;136370118;136373322;136392315;136407980;136485741;136567178	136275466;136279694;136283056;136287063;136304779;136305614;136308594;136309848;136311560;136313008;136314403;136316047;136319839;136326938;136332728;136340137;136360068;136363335;136370241;136373459;136392393;136408027;136485851;136567445	-;-;-;-;-;-;-;-;-;-;-;-;-;-;-;-;-;-;-;-;-;-;-;-	12862	27	58	65	38	51	32	21	17	705	762	104	553	578	748
ENSMUST00000004120	Fancl	11;11;11;11;11;11;11;11;11;11;11;11;11;11	26386135;26397746;26399649;26403322;26407548;26422408;26434432;26459686;26468335;26468672;26468801;26469652;26470877;26471325	26387310;26397804;26399709;26403378;26407648;26422504;26434500;26459836;26468418;26468717;26468882;26469768;26470948;26471876	+;+;+;+;+;+;+;+;+;+;+;+;+;+	2724	109	82	108	97	80	108	52	42	414	330	77	279	336	377
ENSMUST00000004133	Brinp2	1;1;1;1;1;1;1;1	158245271;158249289;158251240;158254974;158266462;158267830;158295426;158355517	158247314;158249511;158251476;158255079;158266670;158268020;158295770;158356260	-;-;-;-;-;-;-;-	4099	1845	1295	1955	1370	1643	1534	558	632	2700	2516	664	2052	1998	3125
ENSMUST00000004134	Gstm5	3;3;3;3;3;3;3;3	107895821;107896298;107896626;107897288;107897462;107897967;107898166;107898451	107895998;107896373;107896690;107897369;107897562;107898062;107898276;107898686	+;+;+;+;+;+;+;+	945	0	0	0	0	0	0	0	0	0	0	0	0	0	0
ENSMUST00000004136	Gstm3	3;3;3;3;3;3;3;3	107963696;107966087;107966279;107967575;107967766;107968136;107968763;107969105	107964296;107966197;107966374;107967675;107967847;107968200;107968838;107969283	-;-;-;-;-;-;-;-	1311	6	22	49	17	7	6	1	0	5	4	1	2	7	6
ENSMUST00000004137	Gstm7	3;3;3;3;3;3;3;3	107926334;107928870;107929063;107930274;107930473;107930828;107931315;107931619	107926980;107928980;107929158;107930374;107930554;107930892;107931390;107931817	-;-;-;-;-;-;-;-	1377	4	14	21	6	9	11	0	3	65	54	53	55	62	70
ENSMUST00000004140	Gstm1	3;3;3;3;3;3;3;3	108012255;108014753;108014945;108016328;108016519;108016884;108017351;108017740	108012778;108014863;108015040;108016428;108016600;108016948;108017426;108017973	-;-;-;-;-;-;-;-	1289	14	35	48	43	15	9	5	8	107	103	130	100	112	105
ENSMUST00000004143	Stat5b	11;11;11;11;11;11;11;11;11;11;11;11;11;11;11;11;11;11;11	100780731;100783672;100784253;100787209;100788369;100788667;100790747;100794544;100796419;100796618;100797064;100797646;100798234;100798591;100801407;100802439;100804870;100808396;100850399	100783222;100783776;100784304;100787379;100788499;100788761;100790953;100794636;100796541;100796705;100797243;100797801;100798385;100798721;100801581;100802528;100805026;100808533;100850724	-;-;-;-;-;-;-;-;-;-;-;-;-;-;-;-;-;-;-	5062	0	0	0	0	0	0	0	0	0	0	0	0	0	0
ENSMUST00000004145	Stat5a	11;11;11;11;11;11;11;11;11;11;11;11;11;11;11;11;11;11;11;11	100859351;100860484;100861328;100861721;100863131;100865331;100874003;100874339;100874923;100875483;100876777;100876942;100879279;100879611;100880277;100880468;100881030;100881738;100882062;100883834	100859580;100860576;100861465;100861877;100863220;100865505;100874133;100874490;100875078;100875662;100876864;100877064;100879371;100879817;100880371;100880598;100881185;100881789;100882166;100885169	+;+;+;+;+;+;+;+;+;+;+;+;+;+;+;+;+;+;+;+	3888	0	0	0	0	0	0	0	0	0	0	0	0	0	0
ENSMUST00000004156	Map3k11	19;19;19;19;19;19;19;19;19;19;19;19	5689131;5689477;5689689;5695161;5695497;5695732;5696007;5696684;5697344;5697558;5700590;5702007	5689266;5689512;5690988;5695341;5695645;5695907;5696250;5696797;5697479;5697649;5700970;5702862	+;+;+;+;+;+;+;+;+;+;+;+	3801	604	481	777	419	609	504	194	181	809	727	378	565	627	889
ENSMUST00000004172	Hmox2	16;16;16;16;16;16	4726363;4762559;4763729;4764606;4765763;4765978	4726471;4762677;4763846;4765097;4765889;4766742	+;+;+;+;+;+	1730	0	0	0	0	0	0	0	0	8	7	1	5	3	5
ENSMUST00000004173	Cdip1	16;16;16;16;16;16	4765461;4768745;4769640;4770043;4770671;4789831	4768649;4769018;4769795;4770151;4770735;4789990	-;-;-;-;-;-	3953	54	49	62	39	60	62	29	16	306	280	129	249	264	276
ENSMUST00000004200	Cwc15	9;9;9;9;9;9;9	14500617;14501916;14502814;14503598;14504833;14507851;14510200	14500781;14502054;14502926;14503686;14504940;14507969;14510577	+;+;+;+;+;+;+	1111	640	596	710	474	645	635	348	385	1507	1431	647	1338	1457	1471
ENSMUST00000004201	Col5a3	9;9;9;9;9;9;9;9;9;9;9;9;9;9;9;9;9;9;9;9;9;9;9;9;9;9;9;9;9;9;9;9;9;9;9;9;9;9;9;9;9;9;9;9;9;9;9;9;9;9;9;9;9;9;9;9;9;9;9;9;9;9;9;9;9;9;9	20770050;20771071;20771587;20772108;20772305;20773085;20773894;20774014;20774316;20774561;20775031;20775233;20775466;20775834;20776092;20776313;20776992;20778477;20778665;20778801;20779016;20779901;20781808;20782487;20782625;20783484;20784669;20785146;20785373;20785573;20786199;20786351;20787090;20787261;20787531;20788551;20792645;20793510;20793711;20793947;20795657;20795810;20795950;20797222;207…	20770978;20771310;20771655;20772220;20772503;20773138;20773929;20774067;20774423;20774614;20775084;20775340;20775519;20775887;20776145;20776366;20777099;20778530;20778718;20778854;20779069;20780008;20781861;20782540;20782732;20783591;20784722;20785235;20785480;20785626;20786252;20786404;20787134;20787314;20787575;20788604;20792698;20793617;20793764;20793991;20795710;20795854;20796003;20797266;207…	-;-;-;-;-;-;-;-;-;-;-;-;-;-;-;-;-;-;-;-;-;-;-;-;-;-;-;-;-;-;-;-;-;-;-;-;-;-;-;-;-;-;-;-;-;-;-;-;-;-;-;-;-;-;-;-;-;-;-;-;-;-;-;-;-;-;-	6119	5	12	16	1	4	5	1	4	24	29	44	20	20	28
ENSMUST00000004202	Dnmt1	9;9;9;9;9;9;9;9;9;9;9;9;9;9;9;9;9;9;9;9;9;9;9;9;9;9;9;9;9;9;9;9;9;9;9;9;9;9;9	20907206;20907871;20908472;20909090;20909693;20910140;20911417;20911733;20912180;20912572;20913897;20915722;20917297;20917906;20918116;20918435;20919840;20920109;20922023;20922294;20922766;20923702;20924023;20926445;20926631;20926806;20927107;20929048;20930125;20932115;20934519;20936543;20937162;20938071;20940476;20941373;20941699;20942583;20952708	20907561;20907961;20908752;20909285;20909870;20910306;20911558;20912015;20912308;20912656;20914089;20915940;20917470;20918042;20918320;20918550;20919987;20920206;20922200;20922481;20922917;20923794;20924141;20926554;20926711;20926848;20927171;20929129;20930165;20932199;20934559;20936621;20937193;20938146;20940554;20941583;20941806;20942619;20952979	-;-;-;-;-;-;-;-;-;-;-;-;-;-;-;-;-;-;-;-;-;-;-;-;-;-;-;-;-;-;-;-;-;-;-;-;-;-;-	5370	19	15	11	4	8	8	4	1	0	0	0	0	0	2
ENSMUST00000004203	Ppan	9;9;9;9;9;9;9;9;9;9;9	20888175;20888407;20889338;20889634;20889771;20890639;20890905;20891083;20891287;20891451;20891832	20888317;20888577;20889439;20889684;20889941;20890715;20891012;20891206;20891365;20891747;20892178	+;+;+;+;+;+;+;+;+;+;+	1670	0	0	0	0	0	0	0	0	0	0	0	0	0	0
ENSMUST00000004206	Eif3g	9;9;9;9;9;9;9;9;9;9;9	20894352;20894633;20894833;20895089;20895828;20896116;20897707;20897888;20898084;20898378;20898544	20894442;20894739;20894969;20895196;20896017;20896220;20897766;20897976;20898167;20898424;20898600	-;-;-;-;-;-;-;-;-;-;-	1075	707	664	836	563	728	762	409	409	1427	1304	262	1242	1326	1539
ENSMUST00000004208	Angptl2	2;2;2;2;2	33216069;33228175;33242200;33243679;33246087	33216453;33229032;33242393;33243949;33247717	+;+;+;+;+	3339	7	26	38	6	6	7	1	0	148	214	104	160	198	253
ENSMUST00000004214	Cacna1e	1;1;1;1;1;1;1;1;1;1;1;1;1;1;1;1;1;1;1;1;1;1;1;1;1;1;1;1;1;1;1;1;1;1;1;1;1;1;1;1;1;1;1;1;1;1;1	154392519;154401983;154403678;154407712;154412064;154412443;154413051;154413976;154416061;154421028;154425837;154426526;154432431;154436418;154437267;154441495;154442132;154443801;154444872;154445500;154448846;154452228;154465719;154466946;154467684;154468946;154471338;154472060;154473857;154477766;154479251;154481552;154482551;154483075;154483517;154485663;154486498;154488044;154488785;154493302…	154398935;154402173;154403858;154407823;154412170;154412543;154413158;154414081;154416157;154421155;154426002;154426617;154432496;154436543;154437350;154441605;154442296;154444002;154445009;154445660;154448942;154452239;154465825;154467005;154467813;154469108;154471651;154472713;154473913;154477863;154479318;154481669;154482623;154483206;154483629;154485775;154486707;154488133;154488838;154493417…	-;-;-;-;-;-;-;-;-;-;-;-;-;-;-;-;-;-;-;-;-;-;-;-;-;-;-;-;-;-;-;-;-;-;-;-;-;-;-;-;-;-;-;-;-;-;-	12697	0	0	0	0	0	0	0	0	0	0	0	0	0	0
ENSMUST00000004222	Hira	16;16;16;16;16;16;16;16;16;16;16;16;16;16;16;16;16;16;16;16;16;16;16;16;16	18877066;18894774;18896454;18897698;18899363;18910648;18912046;18916440;18918976;18922317;18922854;18925648;18927438;18932868;18935018;18946346;18947414;18949136;18951175;18951657;18952064;18953995;18954610;18956169;18969440	18877519;18894836;18896564;18897788;18899457;18910743;18912206;18916607;18919089;18922387;18922959;18925863;18927523;18933062;18935179;18946547;18947518;18949284;18951336;18951715;18952169;18954117;18954773;18956257;18970309	+;+;+;+;+;+;+;+;+;+;+;+;+;+;+;+;+;+;+;+;+;+;+;+;+	4218	133	129	191	103	131	121	42	51	722	694	447	569	603	706
ENSMUST00000004232	Adh1	3;3;3;3;3;3;3;3;3	138277494;138279731;138280374;138282436;138282615;138286692;138288749;138289802;138290535	138277736;138279832;138280512;138282523;138282834;138286952;138288884;138289940;138290698	+;+;+;+;+;+;+;+;+	1492	0	0	0	0	0	0	0	0	0	2	0	1	0	2
ENSMUST00000004281	Dyrk2	10;10;10	118859349;118868150;118868721	118861153;118868298;118868903	-;-;-	2137	593	418	551	395	479	415	184	133	882	796	496	783	892	1206
ENSMUST00000004294	Kifc2	15;15;15;15;15;15;15;15;15;15;15;15;15;15;15;15;15;15	76660641;76661006;76661236;76661480;76661727;76661946;76662101;76662595;76662782;76662974;76664071;76664282;76666029;76666229;76666447;76666663;76666875;76667204	76660765;76661087;76661384;76661618;76661872;76662011;76662229;76662672;76662896;76663083;76664179;76664445;76666133;76666350;76666570;76666792;76667131;76668196	+;+;+;+;+;+;+;+;+;+;+;+;+;+;+;+;+;+	3143	252	255	311	179	247	190	55	37	270	208	119	172	168	189
ENSMUST00000004316	Psap	10;10;10;10;10;10;10;10;10;10;10;10;10;10	60277628;60291639;60292505;60293349;60294533;60294965;60295946;60299092;60299464;60299779;60300148;60300538;60300774;60301694	60277782;60291772;60292579;60293474;60294730;60295108;60296002;60299229;60299559;60300058;60300305;60300618;60300881;60302597	+;+;+;+;+;+;+;+;+;+;+;+;+;+	2654	0	0	0	0	0	0	0	0	1	1	0	1	0	0
ENSMUST00000004326	Plxna3	X;X;X;X;X;X;X;X;X;X;X;X;X;X;X;X;X;X;X;X;X;X;X;X;X;X;X;X;X;X;X;X;X	74329066;74330969;74331967;74332968;74333547;74333746;74334225;74334432;74334673;74335043;74335298;74335770;74336001;74336277;74336492;74336719;74336972;74337406;74337581;74337911;74338134;74338459;74338690;74339070;74339242;74339466;74339775;74340065;74340431;74340843;74341536;74341921;74343447	74329215;74331592;74332506;74333150;74333675;74333846;74334348;74334588;74334772;74335157;74335498;74335866;74336191;74336422;74336612;74336855;74337142;74337499;74337820;74338054;74338368;74338601;74338946;74339136;74339388;74339625;74339878;74340161;74340621;74341012;74341748;74342071;74344689	+;+;+;+;+;+;+;+;+;+;+;+;+;+;+;+;+;+;+;+;+;+;+;+;+;+;+;+;+;+;+;+;+	6943	198	149	164	148	165	162	53	34	9	5	9	5	4	22
ENSMUST00000004327	G6pdx	X;X;X;X;X;X;X;X;X;X;X;X;X	74409483;74410397;74410583;74410757;74411258;74411565;74411966;74412319;74413864;74414908;74415116;74428052;74428823	74410297;74410489;74410659;74410992;74411444;74411658;74412091;74412477;74414081;74415016;74415153;74428179;74429194	-;-;-;-;-;-;-;-;-;-;-;-;-	2652	546	472	639	411	553	546	267	326	919	782	63	781	667	1053
ENSMUST00000004330	Ikbkg	X;X;X;X;X;X;X;X;X;X;X	74424612;74427762;74432805;74433803;74437164;74438907;74439875;74443345;74443772;74447859;74448217	74424715;74427902;74433006;74434014;74437282;74439059;74439950;74443488;74443914;74447920;74453778	+;+;+;+;+;+;+;+;+;+;+	6918	0	0	0	0	0	0	0	0	0	0	0	0	0	0
ENSMUST00000004340	Pax2	19;19;19;19;19;19;19;19;19;19;19	44757394;44760878;44761688;44788777;44790683;44796628;44815908;44818426;44833166;44835391;44835951	44757436;44761043;44761885;44788862;44790802;44796696;44816083;44818552;44833267;44835477;44837871	+;+;+;+;+;+;+;+;+;+;+	3095	0	0	0	0	0	0	0	0	0	0	0	0	0	0
ENSMUST00000004343	Wars2	3;3;3;3;3;3	99141068;99187481;99204536;99205225;99214656;99216459	99141188;99187738;99204616;99205310;99214774;99220203	+;+;+;+;+;+	4410	24	24	30	20	26	15	13	10	20	20	2	14	17	46
ENSMUST00000004375	Phb2	6;6;6;6;6;6;6;6;6;6	124712336;124712704;124713062;124713984;124714830;124715060;124715582;124715954;124716425;124716606	124712563;124712788;124713141;124714168;124714959;124715163;124715659;124716030;124716430;124716950	+;+;+;+;+;+;+;+;+;+	1318	0	0	0	0	0	0	0	0	0	0	0	0	0	0
ENSMUST00000004377	Ptpn6	6;6;6;6;6;6;6;6;6;6;6;6;6;6;6	124720707;124721576;124721763;124722011;124724957;124725227;124727385;124727716;124728112;124728337;124728548;124728781;124732300;124732738;124738499	124721222;124721667;124721914;124722078;124725111;124725358;124727534;124727795;124728208;124728450;124728664;124728970;124732494;124732860;124738625	-;-;-;-;-;-;-;-;-;-;-;-;-;-;-	2308	1	2	6	2	3	1	3	1	43	30	10	24	31	25
ENSMUST00000004378	Eno2	6;6;6;6;6;6;6;6;6;6;6;6	124760055;124761648;124762653;124763005;124763727;124766105;124766531;124767033;124767540;124767701;124768238;124769437	124761362;124761706;124762761;124763206;124763924;124766327;124766664;124767102;124767598;124767796;124768337;124769673	-;-;-;-;-;-;-;-;-;-;-;-	2795	0	1	0	0	0	0	0	0	0	0	0	0	0	0
ENSMUST00000004379	Emg1	6;6;6;6;6;6	124704381;124704939;124705158;124705515;124705741;124711876	124704658;124705088;124705216;124705656;124705842;124712178	-;-;-;-;-;-	1034	0	1	0	0	0	0	0	0	0	1	0	0	1	0
ENSMUST00000004381	Lpcat3	6;6;6;6;6;6;6;6;6;6;6;6;6	124663027;124698070;124699239;124700007;124700241;124700673;124701469;124702236;124702412;124703006;124703227;124703495;124703800	124663359;124698177;124699345;124700100;124700278;124700851;124701577;124702322;124702578;124703153;124703385;124703627;124704418	+;+;+;+;+;+;+;+;+;+;+;+;+	2281	1	0	0	0	0	0	0	0	0	2	0	1	0	0
ENSMUST00000004389	Grcc10	6;6;6	124739183;124740519;124740920	124739413;124740695;124741374	-;-;-	863	69	69	76	45	57	71	34	34	221	218	20	192	190	206
ENSMUST00000004392	Irf5	6;6;6;6;6;6;6;6;6	29526625;29531126;29533952;29534535;29535041;29535253;29535725;29536204;29536540	29526774;29531331;29534141;29534593;29535074;29535510;29536117;29536322;29537319	+;+;+;+;+;+;+;+;+	2189	0	0	2	0	0	0	0	0	0	0	0	0	0	0
ENSMUST00000004396	Atp6v1f	6;6	29467718;29470067	29467974;29470512	+;+	703	113	113	125	96	115	104	70	76	207	182	9	174	187	211
ENSMUST00000004428	Clcn5	X;X;X;X;X;X;X;X;X;X;X;X	7153810;7161236;7161598;7163330;7165580;7166356;7170309;7171144;7178301;7183791;7186184;7188532	7159819;7161452;7161996;7163516;7166122;7166436;7170515;7171266;7178488;7183890;7186335;7188714	-;-;-;-;-;-;-;-;-;-;-;-	8390	59	98	123	41	51	48	28	38	421	508	285	437	371	522
ENSMUST00000004430	Clcn3	8;8;8;8;8;8;8;8;8;8;8;8;8;8	60911923;60914753;60919340;60922790;60927232;60929071;60930681;60933081;60934485;60937300;60938548;60941257;60975732;60982776	60913175;60914828;60919556;60923188;60927418;60929616;60930761;60933287;60934607;60937487;60938647;60941414;60975907;60983239	-;-;-;-;-;-;-;-;-;-;-;-;-;-	4175	0	0	0	0	0	0	0	0	0	0	0	0	0	0
ENSMUST00000004453	Gpx6	13;13;13;13;13	21312217;21313648;21316985;21317569;21318877	21312344;21313801;21317102;21317668;21319620	+;+;+;+;+	1244	463	477	635	483	647	677	304	297	1014	927	223	958	957	1022
ENSMUST00000004456	NA	13;13;13;13;13	21286429;21288704;21289216;21291314;21292574	21287572;21288803;21289333;21291467;21292686	-;-;-;-;-	1629	0	0	0	0	0	0	0	0	0	0	0	0	0	0
ENSMUST00000004470	Utp20	10;10;10;10;10;10;10;10;10;10;10;10;10;10;10;10;10;10;10;10;10;10;10;10;10;10;10;10;10;10;10;10;10;10;10;10;10;10;10;10;10;10;10;10;10;10;10;10;10;10;10;10;10;10;10;10;10;10;10;10;10;10	88746607;88747276;88748226;88749260;88750652;88751345;88752907;88753636;88754477;88754751;88755188;88757025;88757857;88758304;88760870;88761743;88762769;88764674;88765411;88767063;88767453;88768635;88770372;88770685;88771862;88772428;88772852;88774672;88774925;88775209;88776164;88777405;88778223;88780948;88782573;88785990;88787455;88791051;88791684;88792599;88795377;88798281;88798684;88801117;888…	88747059;88747421;88748352;88749541;88750723;88751532;88753039;88753767;88754659;88754820;88755267;88757135;88757988;88758474;88760986;88761884;88762935;88764841;88765509;88767219;88767592;88768924;88770454;88770824;88771999;88772568;88773007;88774824;88774975;88775352;88776251;88777549;88778446;88781027;88782716;88786198;88787621;88791176;88791769;88792689;88795565;88798521;88798763;88801193;888…	-;-;-;-;-;-;-;-;-;-;-;-;-;-;-;-;-;-;-;-;-;-;-;-;-;-;-;-;-;-;-;-;-;-;-;-;-;-;-;-;-;-;-;-;-;-;-;-;-;-;-;-;-;-;-;-;-;-;-;-;-;-	8831	139	148	157	90	165	121	65	43	514	458	210	458	388	503
ENSMUST00000004473	Spic	10;10;10;10;10;10	88674772;88677500;88678524;88679859;88680479;88682975	88676070;88677608;88678636;88679955;88680574;88683023	-;-;-;-;-;-	1763	1	1	2	1	0	0	0	0	3	2	1	0	3	1
ENSMUST00000004480	Sst	16;16	23889581;23890607	23889941;23890844	-;-	599	1	0	0	0	1	0	0	0	1	6	0	4	2	3
ENSMUST00000004494	Sin3b	8;8;8;8;8;8;8;8;8;8;8;8;8;8;8;8;8;8;8	72723288;72724044;72725537;72731081;72733345;72739369;72741474;72741810;72744458;72744894;72746410;72747685;72749719;72750436;72753167;72753545;72756473;72756848;72757175	72723408;72724150;72725690;72731278;72733488;72739488;72741563;72741928;72744665;72745010;72746648;72747868;72750268;72750605;72753340;72753637;72756567;72757052;72758203	+;+;+;+;+;+;+;+;+;+;+;+;+;+;+;+;+;+;+	4117	523	445	591	446	434	432	179	110	1017	1052	518	749	791	1413
ENSMUST00000004497	Large1	8;8;8;8;8;8;8;8;8;8;8;8;8;8;8	72814599;72818076;72823693;72837407;72852125;72859190;72883208;72885691;72912056;73048294;73098830;73116403;73131831;73214125;73352466	72816021;72818271;72823839;72837685;72852288;72859345;72883333;72885803;72912160;73048465;73098953;73116485;73132132;73214312;73352556	-;-;-;-;-;-;-;-;-;-;-;-;-;-;-	3669	0	0	0	0	0	0	0	0	0	0	0	0	0	0
ENSMUST00000004505	Npc1l1	11;11;11;11;11;11;11;11;11;11;11;11;11;11;11;11;11;11;11	6211013;6214011;6214260;6214526;6215021;6217478;6217707;6218234;6218552;6221825;6222142;6223029;6223321;6224138;6224772;6225120;6225629;6227829;6230073	6211660;6214173;6214373;6214757;6215171;6217533;6217833;6218361;6218742;6221914;6222279;6223156;6223435;6224320;6224900;6225292;6225729;6229357;6230143	-;-;-;-;-;-;-;-;-;-;-;-;-;-;-;-;-;-;-	4467	9	10	0	1	4	1	0	0	1	3	1	2	3	6
ENSMUST00000004507	Ddx56	11;11;11;11;11;11;11;11;11;11;11;11;11;11	6258919;6259547;6261616;6262457;6262663;6263939;6264124;6264676;6265512;6266316;6266512;6266811;6267418;6267660	6259258;6259620;6261721;6262546;6262736;6264033;6264237;6264795;6265756;6266406;6266682;6266971;6267579;6267772	-;-;-;-;-;-;-;-;-;-;-;-;-;-	1956	156	157	233	124	221	199	59	57	562	433	489	447	511	526
ENSMUST00000004508	Tmed4	11;11;11;11;11	6270369;6273741;6274108;6274398;6274674	6271800;6273887;6274233;6274498;6274870	-;-;-;-;-	2003	677	656	810	558	734	688	381	409	1811	1857	1066	1728	1812	1799
ENSMUST00000004554	Rps5	7;7;7;7;7;7	12922290;12922973;12925392;12925737;12926396;12926572	12922388;12923081;12925601;12925865;12926494;12926686	+;+;+;+;+;+	761	0	0	0	0	0	0	0	0	0	0	0	0	0	0
ENSMUST00000004560	Bid	6;6;6;6;6;6	120892854;120895619;120897220;120900156;120901723;120916734	120894292;120895831;120897359;120900366;120901788;120916853	-;-;-;-;-;-	2189	0	1	0	0	0	0	2	0	4	5	19	5	6	5
ENSMUST00000004565	Ralb	1;1;1;1;1	119470305;119475895;119477915;119483494;119504577	119471825;119476072;119478123;119483656;119504794	-;-;-;-;-	2289	79	111	228	89	105	107	51	42	653	602	275	474	579	687
ENSMUST00000004569	NA	7;7	119739926;119741935	119741070;119742226	+;+	1437	0	0	0	2	0	0	0	0	9	8	12	8	15	12
ENSMUST00000004574	Dnajb11	16;16;16;16;16;16;16;16;16;16	22857845;22862542;22865454;22866920;22868711;22869121;22869416;22870571;22870940;22871671	22858109;22862698;22865551;22867052;22868853;22869203;22869473;22870682;22871099;22872388	+;+;+;+;+;+;+;+;+;+	1927	1	4	2	5	4	10	4	5	15	15	34	19	18	12
ENSMUST00000004576	Tbccd1	16;16;16;16;16;16;16;16	22813215;22818381;22822082;22822703;22825766;22833878;22841729;22857345	22813956;22818528;22822579;22822889;22826132;22834033;22842107;22857569	-;-;-;-;-;-;-;-	2702	607	458	663	464	554	591	198	190	1651	1557	382	1177	1189	1597
ENSMUST00000004587	Clec11a	7;7;7;7	44303770;44305829;44306273;44306619	44304986;44306020;44306474;44306959	-;-;-;-	1952	65	153	110	37	96	108	30	56	292	225	34	216	236	266
ENSMUST00000004614	Zfp110	7;7;7;7;7;7;7;7	12834761;12835447;12836293;12837089;12844432;12846796;12847972;12848397	12835164;12835527;12836419;12837184;12844905;12846896;12848098;12850577	+;+;+;+;+;+;+;+	3591	42	35	63	37	40	49	29	34	437	415	194	402	438	455
ENSMUST00000004622	Gab2	7;7;7;7;7;7;7;7;7;7	97081751;97223473;97271802;97298828;97300299;97301371;97302369;97303024;97304150;97304876	97081906;97223773;97272042;97299402;97300369;97301635;97302459;97303129;97304275;97308940	+;+;+;+;+;+;+;+;+;+	5997	131	185	240	119	100	92	30	27	513	544	350	411	463	518
ENSMUST00000004634	Slc1a4	11;11;11;11;11;11;11;11	20302205;20306466;20307892;20308404;20313916;20318660;20320192;20331946	20304500;20306600;20308086;20308637;20314082;20318722;20320234;20332684	-;-;-;-;-;-;-;-	3872	0	0	0	0	0	0	0	0	0	0	0	0	0	0
ENSMUST00000004646	Coro1c	5;5;5;5;5;5;5;5;5;5;5	113842436;113845161;113846146;113847434;113848527;113849529;113850651;113852171;113865639;113881958;113908611	113844468;113845406;113846203;113847579;113848631;113849648;113850832;113852300;113865761;113882157;113908758	-;-;-;-;-;-;-;-;-;-;-	3491	0	0	0	0	0	0	0	0	0	0	0	0	0	0
ENSMUST00000004655	Psg17	7;7;7;7;7	18813937;18816785;18818565;18819900;18821352	18814700;18817144;18818924;18820259;18821607	-;-;-;-;-	2100	0	2	6	2	3	0	2	0	27	31	14	35	45	30
ENSMUST00000004657	Psg19	7;7;7;7;7	18789567;18792420;18794033;18796804;18798254	18790334;18792779;18794392;18797163;18798510	-;-;-;-;-	2105	0	0	0	0	0	0	0	0	0	0	1	0	0	1
ENSMUST00000004673	Ndrg2	14;14;14;14;14;14;14;14;14;14;14;14;14;14;14;14	51905271;51906513;51906690;51906949;51907246;51907585;51908068;51908330;51908568;51908874;51910058;51910315;51910680;51911086;51911466;51913323	51906306;51906564;51906725;51906996;51907297;51907629;51908171;51908386;51908654;51908934;51910120;51910435;51910785;51911127;51911546;51913488	-;-;-;-;-;-;-;-;-;-;-;-;-;-;-;-	2157	0	0	0	0	0	0	0	0	0	0	0	0	0	0
ENSMUST00000004681	Pnpla6	8;8;8;8;8;8;8;8;8;8;8;8;8;8;8;8;8;8;8;8;8;8;8;8;8;8;8;8;8;8;8;8;8;8	3515384;3516681;3517077;3517325;3517558;3521275;3521508;3522101;3522277;3522588;3522759;3523258;3523758;3523999;3524252;3530962;3531429;3531638;3532003;3532352;3534530;3534832;3535462;3535820;3536543;3536863;3537249;3537451;3537969;3541291;3542298;3542845;3543067;3543954	3515556;3516749;3517164;3517407;3517655;3521415;3521667;3522181;3522405;3522668;3522924;3523341;3523867;3524166;3524329;3531167;3531560;3531761;3532116;3532427;3534670;3534895;3535630;3536002;3536661;3537019;3537365;3537520;3538085;3541592;3542414;3542941;3543176;3544266	+;+;+;+;+;+;+;+;+;+;+;+;+;+;+;+;+;+;+;+;+;+;+;+;+;+;+;+;+;+;+;+;+;+	4437	0	0	0	0	0	0	0	0	0	0	0	0	0	0
ENSMUST00000004683	Mcoln1	8;8;8;8;8;8;8;8;8;8;8;8;8;8	3500457;3505738;3507149;3507401;3508319;3508684;3509136;3510320;3510540;3510814;3511688;3512650;3514783;3515014	3500627;3505943;3507316;3507566;3508427;3508780;3509235;3510426;3510689;3510915;3511810;3512865;3514913;3515232	+;+;+;+;+;+;+;+;+;+;+;+;+;+	2065	0	0	2	0	0	0	0	0	0	1	0	0	0	1
ENSMUST00000004684	Arhgef18	8;8;8;8;8;8;8;8;8;8;8;8;8;8;8;8;8;8;8;8	3393038;3427349;3429232;3429499;3432619;3434872;3436982;3439487;3441220;3444889;3447002;3448383;3450296;3450781;3451491;3451631;3451815;3453038;3454159;3454372	3393102;3427490;3429344;3429639;3432869;3434997;3437099;3439738;3441296;3445067;3447090;3448568;3450436;3450914;3451538;3451678;3452285;3453371;3454284;3456601	+;+;+;+;+;+;+;+;+;+;+;+;+;+;+;+;+;+;+;+	5271	0	0	0	0	0	0	0	0	0	0	0	0	0	0
ENSMUST00000004686	Pex11g	8;8;8;8;8	3457105;3460272;3463922;3465783;3467572	3459434;3460334;3464100;3465971;3467680	-;-;-;-;-	2870	47	65	65	43	58	48	19	12	357	318	335	251	304	295
ENSMUST00000004715	Mospd2	X;X;X;X;X;X;X;X;X;X;X;X;X;X;X	164938209;164939643;164943431;164944217;164944973;164947242;164948067;164951851;164956479;164958756;164962052;164963927;164964982;164979994;164980215	164938692;164939745;164943560;164944313;164945069;164947354;164948243;164951975;164956517;164958816;164962206;164964013;164965137;164980063;164980335	-;-;-;-;-;-;-;-;-;-;-;-;-;-;-	2015	24	27	24	11	15	14	7	17	46	35	2	27	18	53
ENSMUST00000004728	Cd33	7;7;7;7;7;7;7	43527456;43529473;43529866;43530212;43532038;43532602;43533058	43529008;43529555;43529932;43530305;43532316;43532982;43533171	-;-;-;-;-;-;-	2571	0	4	2	0	0	0	0	0	1	2	0	0	0	0
ENSMUST00000004729	Etfb	7;7;7;7;7;7	43444108;43452341;43452799;43454518;43456479;43457570	43444204;43452499;43452957;43454580;43456637;43457800	+;+;+;+;+;+	868	218	207	282	160	193	239	121	144	651	651	234	638	698	667
ENSMUST00000004732	Lim2	7;7;7;7;7	43430088;43430585;43433568;43435306;43435648	43430156;43430765;43433717;43435440;43435991	+;+;+;+;+	879	0	0	0	0	0	0	0	0	0	0	0	0	0	0
ENSMUST00000004745	Stxbp2	8;8;8;8;8;8;8;8;8;8;8;8;8;8;8;8;8;8;8	3631170;3632220;3632500;3633291;3633848;3634020;3634475;3635446;3635616;3635832;3636181;3636356;3636494;3637116;3639508;3641111;3641735;3641895;3642646	3631204;3632269;3632581;3633367;3633926;3634123;3634623;3635530;3635746;3635939;3636238;3636421;3636574;3637254;3639617;3641206;3641820;3642055;3642795	+;+;+;+;+;+;+;+;+;+;+;+;+;+;+;+;+;+;+	1847	0	0	0	0	0	0	0	0	0	0	0	0	0	0
ENSMUST00000004749	Pcp2	8;8;8;8	3623377;3624508;3624786;3625210	3623558;3624632;3624900;3625282	-;-;-;-	495	1	0	0	2	0	0	0	0	0	0	0	0	0	0
ENSMUST00000004750	Sgce	6;6;6;6;6;6;6;6;6;6;6	4674352;4677163;4678067;4689579;4691429;4694022;4707074;4711308;4717921;4719374;4746980	4674632;4677233;4678110;4689767;4691640;4694184;4707272;4711380;4718078;4719496;4747204	-;-;-;-;-;-;-;-;-;-;-	1738	0	0	0	0	0	0	0	0	0	0	0	0	0	0
ENSMUST00000004756	Wwox	8;8;8;8;8;8;8;8;8	114439655;114444468;114445340;114448160;114488898;114679787;114706201;114711987;115351638	114439878;114444532;114445397;114448338;114489004;114679875;114706386;114712251;115352708	+;+;+;+;+;+;+;+;+	2244	69	67	95	51	67	62	15	11	313	249	47	236	235	294
ENSMUST00000004761	Nrf1	6;6;6;6;6;6;6;6;6;6	30089895;30095340;30098449;30102169;30115013;30116096;30117056;30118949;30126235;30129181	30090146;30095454;30098575;30102309;30115171;30116293;30117157;30119106;30126359;30129392	+;+;+;+;+;+;+;+;+;+	1589	0	0	0	0	0	0	0	0	0	0	0	0	0	0
ENSMUST00000004770	Tyr	7;7;7;7;7	87427405;87437937;87472399;87483821;87492532	87429284;87438118;87472546;87484037;87493411	-;-;-;-;-	3307	3	1	2	0	0	0	0	1	0	2	0	2	1	0
ENSMUST00000004774	Aqp1	6;6;6;6	55336432;55345406;55345813;55346618	55336874;55345570;55345893;55348555	+;+;+;+	2627	98	181	338	72	168	129	58	50	821	805	473	697	749	883
ENSMUST00000004780	Arid3b	9;9;9;9;9;9;9;9	57790513;57794936;57796107;57796472;57798042;57810165;57810409;57833616	57792685;57795034;57796352;57796788;57798225;57810237;57810480;57834236	-;-;-;-;-;-;-;-	3785	0	0	0	0	0	0	0	0	0	0	0	0	0	0
ENSMUST00000004784	Cnn2	10;10;10;10;10;10;10	79988584;79991360;79992273;79992443;79993214;79993428;79994351	79988740;79991481;79992339;79992580;79993330;79993574;79996062	+;+;+;+;+;+;+	2460	57	144	290	79	61	46	33	13	465	535	247	489	520	516
ENSMUST00000004786	Polr2e	10;10;10;10;10;10;10	80035949;80036527;80036764;80036915;80037188;80038439;80039583	80036301;80036598;80036842;80036973;80037384;80038613;80039795	-;-;-;-;-;-;-	1148	0	0	0	0	0	1	0	0	0	0	0	0	1	0
ENSMUST00000004827	Ly9	1;1;1;1;1;1;1;1;1	171588632;171593423;171593855;171596490;171597684;171599647;171600982;171601787;171607200	171589125;171593494;171594189;171596543;171597782;171599916;171601320;171602062;171607358	-;-;-;-;-;-;-;-;-	2098	0	0	0	0	0	0	0	0	0	0	0	0	0	0
ENSMUST00000004829	Cd244a	1;1;1;1;1;1;1;1;1	171559193;171573681;171574093;171577243;171577815;171579099;171580758;171581643;171582804	171559385;171574004;171574368;171577347;171577969;171579170;171580820;171581699;171585318	+;+;+;+;+;+;+;+;+	3760	3	9	18	0	0	2	2	0	10	5	10	6	6	7
ENSMUST00000004850	Adgre1	17;17;17;17;17;17;17;17;17;17;17;17;17;17;17;17;17;17;17;17;17;17;17	57358714;57361672;57401905;57402501;57402742;57406834;57408346;57410718;57410945;57413673;57419322;57420347;57441255;57443898;57445009;57447830;57449866;57460693;57475829;57478772;57480920;57483115;57483255	57358756;57361734;57402051;57402656;57402861;57406980;57408495;57410858;57411091;57413761;57419405;57420524;57441371;57444082;57445179;57448024;57450101;57460759;57475920;57478940;57481024;57483167;57483523	+;+;+;+;+;+;+;+;+;+;+;+;+;+;+;+;+;+;+;+;+;+;+	3124	0	0	0	0	0	0	0	0	0	0	0	0	0	0
ENSMUST00000004868	Mtfp1	11;11;11;11	4091480;4093801;4094389;4095216	4092299;4094033;4094516;4095445	-;-;-;-	1411	3	16	24	18	18	18	2	1	107	86	135	81	104	85
ENSMUST00000004892	Rab11a	9;9;9;9	64716953;64726624;64728234;64737584	64716988;64726817;64728429;64737752	-;-;-;-	595	0	0	0	0	0	0	0	0	0	0	0	0	0	0
ENSMUST00000004910	Eif2b2	12;12;12;12;12;12;12;12	85219481;85219822;85220097;85221477;85222744;85223381;85224555;85226003	85219724;85219942;85220245;85221640;85222839;85223518;85224621;85226628	+;+;+;+;+;+;+;+	1605	7	2	3	4	1	2	4	1	13	25	0	17	17	20
ENSMUST00000004913	Pgf	12;12;12;12;12;12;12	85166639;85169358;85169511;85171375;85171660;85175756;85176898	85167414;85169417;85169540;85171454;85171856;85175795;85177296	-;-;-;-;-;-;-	1582	39	59	56	28	56	46	15	13	208	144	149	131	174	101
ENSMUST00000004920	Ulk2	11;11;11;11;11;11;11;11;11;11;11;11;11;11;11;11;11;11;11;11;11;11;11;11;11;11;11	61775649;61779674;61781592;61782006;61783537;61787429;61791434;61799063;61799460;61799902;61801483;61803642;61808062;61812718;61819285;61824639;61825842;61827602;61829392;61830590;61833413;61834780;61840110;61841299;61851062;61853266;61854487	61777839;61779809;61781749;61782124;61783715;61787637;61791583;61799166;61799650;61800188;61801563;61803787;61808199;61812778;61819456;61824727;61825889;61827684;61829450;61830691;61833486;61834953;61840146;61841331;61851103;61853358;61855073	-;-;-;-;-;-;-;-;-;-;-;-;-;-;-;-;-;-;-;-;-;-;-;-;-;-;-	5743	267	260	326	189	245	207	168	115	2086	2218	1528	2067	2039	2192
ENSMUST00000004936	Ccl24	5;5;5	135569937;135572576;135572900	135570963;135572693;135573043	-;-;-	1289	0	0	1	0	0	0	0	0	0	0	2	0	0	0
ENSMUST00000004943	Tmed11	5;5;5;5;5	108777235;108778907;108779816;108786104;108795187	108777446;108779053;108779941;108786204;108795363	-;-;-;-;-	763	0	0	0	0	0	0	0	0	0	0	0	0	0	0
ENSMUST00000004949	Traf6	2;2;2;2;2;2;2;2	101678440;101680825;101684479;101688464;101690056;101691428;101694255;101696663	101678620;101681027;101684796;101688614;101690214;101691499;101694332;101701669	+;+;+;+;+;+;+;+	6169	107	157	212	88	144	97	53	54	691	765	518	802	702	835
ENSMUST00000004955	Prpsap2	11;11;11;11;11;11;11;11;11;11;11;11	61729654;61731425;61735008;61736916;61740946;61744945;61748912;61752867;61755410;61756195;61756582;61761954	61730302;61731571;61735078;61737064;61741001;61745060;61749084;61752933;61755462;61756345;61756677;61762062	-;-;-;-;-;-;-;-;-;-;-;-	1837	0	0	0	0	0	0	0	0	0	0	0	0	0	0
ENSMUST00000004959	Grap	11;11;11;11;11	61653265;61660222;61664185;61669836;61671673	61653424;61660319;61664307;61670004;61672784	+;+;+;+;+	1662	16	19	34	5	13	13	7	4	52	72	45	64	68	60
ENSMUST00000004964	Pou1f1	16;16;16;16;16;16;16	65520512;65523485;65529730;65531830;65532894;65533771;65534648	65520770;65523634;65529954;65531994;65532954;65534325;65535005	+;+;+;+;+;+;+	1773	0	0	2	0	0	0	0	0	2	3	9	1	8	0
ENSMUST00000004965	Chmp2b	16;16;16;16;16;16	65539133;65540420;65545277;65546849;65550963;65562475	65540250;65540526;65545379;65547043;65551054;65562697	-;-;-;-;-;-	1838	388	345	501	298	387	378	200	175	1604	1530	600	1331	1352	1661
ENSMUST00000004968	Plod3	5;5;5;5;5;5;5;5;5;5;5;5;5;5;5;5;5;5;5	136987019;136988117;136988335;136988572;136988883;136989126;136989598;136989897;136990151;136990418;136990745;136990959;136991300;136991544;136991772;136993209;136994143;136994933;136996106	136987803;136988208;136988471;136988735;136988995;136989189;136989695;136989998;136990276;136990539;136990849;136991084;136991441;136991657;136991840;136993313;136994289;136995058;136996648	+;+;+;+;+;+;+;+;+;+;+;+;+;+;+;+;+;+;+	3280	58	68	123	70	74	66	32	16	323	303	236	231	255	319
ENSMUST00000004985	Brpf3	17;17;17;17;17;17;17;17;17;17;17;17;17	28801090;28805929;28810513;28814586;28817065;28817486;28818336;28821086;28823973;28828344;28831314;28835762;28836510	28801361;28807399;28810669;28814717;28817193;28817798;28818638;28821592;28824066;28828441;28831411;28835916;28838546	+;+;+;+;+;+;+;+;+;+;+;+;+	5766	29	25	30	24	21	32	6	4	11	10	1	9	9	12
ENSMUST00000004986	Mapk13	17;17;17;17;17;17;17;17;17;17;17;17	28769307;28770011;28771158;28775254;28775554;28776135;28776302;28776502;28777482;28777723;28778077;28778428	28769528;28770140;28771216;28775362;28775583;28776182;28776416;28776573;28777561;28777801;28778253;28778698	+;+;+;+;+;+;+;+;+;+;+;+	1392	0	7	6	1	3	1	0	0	30	27	75	32	41	22
ENSMUST00000004987	Srpk1	17;17;17;17;17;17;17;17;17;17;17;17	28589591;28591201;28592218;28594170;28598902;28599471;28600869;28602688;28603438;28605299;28606307;28607084	28590241;28591293;28592287;28594277;28599002;28599869;28600894;28602853;28603544;28605386;28606394;28607169	-;-;-;-;-;-;-;-;-;-;-;-	1983	0	0	0	0	0	0	0	0	0	0	0	0	0	0
ENSMUST00000004990	Mapk14	17;17;17;17;17;17;17;17;17;17;17;17	28691342;28713774;28715383;28724744;28725493;28725797;28728357;28728904;28740680;28741788;28744983;28746271	28691855;28713903;28715441;28724855;28725522;28725844;28728471;28728975;28740759;28741866;28745156;28748404	+;+;+;+;+;+;+;+;+;+;+;+	3547	0	0	1	0	1	0	0	0	2	1	0	1	0	3
ENSMUST00000004994	Pax3	1;1;1;1;1;1;1;1;1	78101267;78103328;78121578;78122591;78132228;78192442;78193740;78195251;78196665	78102835;78103574;78121792;78122756;78132433;78192576;78193869;78195486;78196838	-;-;-;-;-;-;-;-;-	3078	0	0	0	0	0	0	0	0	0	0	0	0	0	0
ENSMUST00000005003	Lbr	1;1;1;1;1;1;1;1;1;1;1;1;1;1	181815316;181817265;181817489;181818840;181819864;181820674;181821436;181825622;181828712;181831542;181832149;181836058;181838378;181842288	181817018;181817387;181817569;181819008;181819989;181820777;181821627;181825676;181828908;181831734;181832232;181836288;181838556;181842401	-;-;-;-;-;-;-;-;-;-;-;-;-;-	3551	230	282	461	162	247	224	129	110	861	971	530	811	867	1099
ENSMUST00000005014	Hapln2	3;3;3;3;3;3;3	88022061;88023221;88023524;88023765;88024330;88026885;88027385	88022825;88023403;88023640;88024118;88024471;88026940;88027478	-;-;-;-;-;-;-	1711	0	0	0	0	0	0	0	0	0	0	0	0	0	0
ENSMUST00000005015	Prcc	3;3;3;3;3;3;3	87858900;87860146;87862131;87867315;87869583;87872210;87884875	87859346;87860211;87862274;87867410;87870149;87872257;87885608	-;-;-;-;-;-;-	2102	666	666	915	557	747	721	298	331	1587	1433	653	1260	1342	1540
ENSMUST00000005016	Rrnad1	3;3;3;3;3;3;3;3	87922905;87924344;87924947;87926731;87927055;87927563;87927924;87929856	87923912;87924528;87925431;87926874;87927117;87927755;87928048;87930144	-;-;-;-;-;-;-;-	2492	0	0	0	0	0	0	0	0	0	0	0	0	0	0
ENSMUST00000005017	Hdgf	3;3;3;3;3;3	87906321;87913091;87913313;87914052;87914473;87914902	87906714;87913167;87913451;87914237;87914690;87916132	+;+;+;+;+;+	2245	964	1018	1213	799	1019	912	546	467	2223	2192	1200	2081	2160	2227
ENSMUST00000005019	Crabp2	3;3;3;3	87948666;87952115;87952478;87952987	87948910;87952293;87952594;87953376	+;+;+;+	931	18	106	163	59	30	14	11	29	321	336	232	316	360	343
ENSMUST00000005041	U2af2	7;7;7;7;7;7;7;7;7;7;7;7	5062143;5066403;5067210;5067544;5068032;5069444;5070362;5074581;5074735;5075141;5075468;5079182	5062336;5066538;5067254;5067647;5068183;5069560;5070500;5074660;5074857;5075239;5075716;5079945	+;+;+;+;+;+;+;+;+;+;+;+	2202	205	212	255	193	236	236	118	133	289	221	10	196	156	345
ENSMUST00000005051	Ldha	7;7;7;7;7;7;7;7	46847131;46847596;46848973;46850178;46850885;46851877;46853983;46854977	46847388;46847745;46849090;46850351;46851058;46851994;46854106;46855626	+;+;+;+;+;+;+;+	1766	0	0	0	0	1	0	0	0	2	0	0	0	0	2
ENSMUST00000005053	Tmem242	17;17;17;17	5410870;5433442;5439532;5440133	5411467;5433579;5439632;5440243	-;-;-;-	948	171	165	212	92	136	166	79	118	512	464	116	383	467	484
ENSMUST00000005057	Thop1	10;10;10;10;10;10;10;10;10;10;10;10;10	81070035;81073153;81075511;81076943;81077913;81078470;81079458;81079871;81080413;81081027;81081307;81081600;81081864	81070278;81073365;81075659;81077050;81078015;81078630;81079593;81080237;81080614;81081213;81081435;81081736;81082559	+;+;+;+;+;+;+;+;+;+;+;+;+	2832	527	446	535	371	594	600	285	292	1299	1119	345	1112	1096	1342
ENSMUST00000005064	Pias4	10;10;10;10;10;10;10;10;10;10;10	81153266;81154448;81155591;81155833;81157012;81157227;81157437;81157651;81157933;81163785;81167685	81154372;81154578;81155751;81155906;81157117;81157355;81157527;81157692;81158017;81164190;81167923	-;-;-;-;-;-;-;-;-;-;-	2571	142	110	164	71	115	108	81	59	717	696	299	663	673	775
ENSMUST00000005066	Map2k1	9;9;9;9;9;9;9;9;9;9;9	64185770;64187291;64187677;64191267;64191453;64193702;64204431;64205111;64212584;64214399;64253213	64186798;64187336;64187738;64191331;64191654;64193826;64204482;64205188;64212730;64214609;64253631	-;-;-;-;-;-;-;-;-;-;-	2436	318	323	455	265	374	340	160	180	1137	1077	386	1014	952	1237
ENSMUST00000005067	Sgta	10;10;10;10;10;10;10;10;10;10;10;10	81044075;81046190;81046475;81047639;81048380;81048838;81049253;81049782;81050999;81051223;81052116;81060128	81045003;81046312;81046564;81047676;81048442;81048976;81049357;81049881;81051086;81051329;81052251;81060178	-;-;-;-;-;-;-;-;-;-;-;-	1969	1229	1168	1379	902	1286	1286	613	623	1862	1581	672	1561	1473	1926
ENSMUST00000005069	Nmrk2	10;10;10;10;10;10;10	81198170;81199604;81200025;81200292;81200532;81200891;81201951	81199446;81199710;81200096;81200448;81200580;81200981;81202037	-;-;-;-;-;-;-	1840	0	0	0	0	0	0	0	0	2	4	0	0	1	0
ENSMUST00000005072	Dtx2	5;5;5;5;5;5;5;5;5;5;5	135994877;135996290;136010014;136012011;136021755;136026470;136028502;136029064;136030480;136031186;136032260	135994966;135996452;136010356;136012647;136021858;136026607;136028572;136029222;136030641;136031275;136032864	+;+;+;+;+;+;+;+;+;+;+	2562	0	0	0	0	0	0	0	0	0	0	0	0	0	0
ENSMUST00000005073	Zp3	5;5;5;5;5;5;5;5	135980099;135982639;135984162;135984348;135985545;135987255;135987472;135988400	135980442;135982757;135984265;135984531;135985662;135987346;135987608;135988624	+;+;+;+;+;+;+;+	1323	0	0	2	0	0	0	0	0	1	2	2	0	0	1
ENSMUST00000005077	Hspb1	5;5;5	135887919;135889049;135889241	135888434;135889112;135889563	+;+;+	903	0	0	0	1	0	0	0	1	1	0	0	0	1	2
ENSMUST00000005103	Nfe2l3	6;6;6;6	51432670;51450967;51456594;51457230	51433413;51451143;51456677;51458768	+;+;+;+	2544	46	46	74	33	55	29	14	18	222	189	125	188	180	302
ENSMUST00000005108	Kdm5a	6;6;6;6;6;6;6;6;6;6;6;6;6;6;6;6;6;6;6;6;6;6;6;6;6;6;6;6	120364124;120366570;120368932;120374817;120381535;120382917;120385622;120388010;120388930;120389553;120390654;120394087;120398938;120402506;120404965;120405860;120406575;120408245;120412155;120415216;120418559;120419400;120426814;120427729;120428218;120430060;120431813;120438985	120364778;120366647;120369054;120374987;120381669;120383022;120385713;120388168;120389049;120389711;120390835;120394249;120399057;120402700;120405146;120405984;120406725;120408359;120412510;120415354;120418738;120419561;120427365;120427872;120428377;120430280;120432223;120444574	+;+;+;+;+;+;+;+;+;+;+;+;+;+;+;+;+;+;+;+;+;+;+;+;+;+;+;+	10946	0	0	0	0	0	0	0	0	0	0	0	0	0	0
ENSMUST00000005114	Fxyd4	6;6;6;6;6;6;6;6	117933729;117933844;117934315;117934426;117935009;117935155;117935854;117937291	117933748;117933881;117934351;117934500;117935032;117935187;117936780;117937335	-;-;-;-;-;-;-;-	1199	0	1	0	0	0	0	0	1	8	11	10	9	5	14
ENSMUST00000005120	Ccdc130	8;8;8;8;8;8;8;8;8	84258301;84260294;84260543;84261740;84262993;84263862;84264309;84266836;84270342	84258926;84260466;84260685;84261800;84263048;84263944;84264362;84267074;84270347	-;-;-;-;-;-;-;-;-	1441	0	0	0	0	0	0	0	0	0	0	0	0	0	0
ENSMUST00000005122	Mri1	8;8;8;8	84253931;84254176;84256308;84256890	84254087;84254352;84256419;84257247	-;-;-;-	804	0	0	0	0	0	0	0	0	0	0	0	0	0	0
ENSMUST00000005164	Prkacb	3;3;3;3;3;3;3;3;3;3	146729867;146737934;146745260;146746600;146747921;146750483;146751447;146755632;146757707;146781147	146732713;146738098;146745382;146746695;146748047;146750565;146751545;146755760;146757768;146781416	-;-;-;-;-;-;-;-;-;-	4001	1	0	2	0	1	1	0	0	0	0	0	0	0	0
ENSMUST00000005173	Sgsh	11;11;11;11;11;11;11;11	119343482;119347688;119349540;119349977;119350402;119350924;119352646;119355397	119346837;119347891;119349621;119350133;119350552;119351029;119352806;119355536	-;-;-;-;-;-;-;-	4357	0	0	0	0	0	0	0	0	0	0	0	0	0	0
ENSMUST00000005175	Chd5	4;4;4;4;4;4;4;4;4;4;4;4;4;4;4;4;4;4;4;4;4;4;4;4;4;4;4;4;4;4;4;4;4;4;4;4;4;4;4;4;4	152338887;152347936;152353541;152356081;152356620;152358498;152359688;152360564;152360821;152362885;152363275;152366127;152366361;152367282;152367829;152370505;152370728;152371578;152372084;152373446;152374332;152375077;152376136;152376580;152376969;152377616;152378178;152378458;152378730;152379365;152379820;152380448;152381147;152382335;152382892;152383270;152384124;152384485;152385433;152385949…	152339030;152348063;152353729;152356199;152356858;152358619;152359811;152360730;152361042;152363091;152363486;152366258;152366469;152367473;152368029;152370642;152370849;152371751;152372225;152373577;152374449;152375201;152376367;152376690;152377141;152377790;152378270;152378546;152378863;152379509;152379979;152380527;152381279;152382412;152383029;152383378;152384256;152384680;152385596;152386002…	+;+;+;+;+;+;+;+;+;+;+;+;+;+;+;+;+;+;+;+;+;+;+;+;+;+;+;+;+;+;+;+;+;+;+;+;+;+;+;+;+	9122	0	0	0	0	0	0	0	0	0	0	0	0	0	0
ENSMUST00000005185	Cstb	10;10;10	78425670;78426927;78427311	78425857;78427028;78427619	+;+;+	599	323	289	366	238	308	293	156	178	722	716	463	699	755	703
ENSMUST00000005188	Sh2b2	5;5;5;5;5;5;5;5;5	136218149;136219642;136221848;136224155;136224405;136225204;136227367;136231653;136244629	136219152;136219813;136222056;136224322;136224496;136225295;136227468;136232386;136244903	-;-;-;-;-;-;-;-;-	2848	181	286	490	264	230	286	82	75	135	114	16	67	80	290
ENSMUST00000005218	Cd44	2;2;2;2;2;2;2;2;2;2;2;2;2;2;2;2;2;2;2	102811141;102822208;102824261;102828542;102831330;102832483;102834234;102837813;102839358;102842261;102842836;102845285;102846403;102848657;102853015;102855899;102861560;102865281;102901268	102814337;102822286;102824332;102828610;102831536;102832572;102834335;102837938;102839477;102842377;102842949;102845410;102846519;102848782;102853236;102855967;102861696;102865446;102901625	-;-;-;-;-;-;-;-;-;-;-;-;-;-;-;-;-;-;-	5614	0	0	1	0	0	0	0	0	0	2	0	1	0	0
ENSMUST00000005220	Slc1a2	2;2;2;2;2;2;2;2;2;2	102706438;102735944;102737777;102739689;102743808;102748469;102755907;102761015;102766933;102777427	102706483;102736083;102737929;102739939;102743973;102748595;102756140;102761209;102767067;102778106	+;+;+;+;+;+;+;+;+;+	2127	0	0	0	0	0	0	0	0	0	0	0	1	0	0
ENSMUST00000005233	Eif2ak4	2;2;2;2;2;2;2;2;2;2;2;2;2;2;2;2;2;2;2;2;2;2;2;2;2;2;2;2;2;2;2;2;2;2;2;2;2;2;2	118388618;118400535;118405047;118408352;118410883;118412935;118417227;118420718;118421963;118426565;118427828;118430796;118432211;118434623;118436163;118438966;118441162;118442015;118443125;118446260;118448276;118450310;118451412;118454828;118455776;118457126;118457826;118461727;118462224;118462664;118463946;118466353;118468162;118470244;118470836;118471890;118472642;118474032;118475003	118388852;118400647;118405149;118408504;118410963;118413083;118417342;118420872;118422498;118426671;118427985;118431223;118432280;118434706;118436285;118439070;118441219;118442094;118443226;118446313;118448512;118450385;118451533;118454877;118455944;118457242;118457891;118461897;118462358;118462771;118464074;118466439;118468274;118470302;118470933;118471958;118472686;118474150;118475234	+;+;+;+;+;+;+;+;+;+;+;+;+;+;+;+;+;+;+;+;+;+;+;+;+;+;+;+;+;+;+;+;+;+;+;+;+;+;+	5212	0	0	0	0	0	0	0	0	0	0	0	0	0	0
ENSMUST00000005234	Wdr1	5;5;5;5;5;5;5;5;5;5;5;5;5;5;5	38526814;38529525;38529937;38531015;38533484;38535184;38537139;38540013;38540504;38540801;38545674;38546944;38551377;38561080;38561516	38527912;38529669;38530110;38531125;38533571;38535340;38537226;38540246;38540584;38540878;38545854;38547091;38551467;38561201;38561666	-;-;-;-;-;-;-;-;-;-;-;-;-;-;-	2948	1859	1705	2073	1411	1813	1782	836	859	2990	2597	977	2455	2293	3353
ENSMUST00000005238	Slc2a9	5;5;5;5;5;5;5;5;5;5;5	38349306;38362843;38379918;38382043;38391714;38436540;38440650;38453102;38477395;38483317;38501959	38351337;38362970;38379993;38382144;38391824;38436685;38440774;38453262;38477493;38483385;38502152	-;-;-;-;-;-;-;-;-;-;-	3243	0	0	0	0	0	0	0	0	0	0	0	0	0	0
ENSMUST00000005255	Ccn4	15;15;15;15;15	66891320;66906401;66912829;66917277;66919155	66891634;66906680;66913089;66917470;66923201	+;+;+;+;+	5097	0	2	8	4	2	4	7	1	150	260	162	189	194	299
ENSMUST00000005256	Ndrg1	15;15;15;15;15;15;15;15;15;15;15;15;15;15;15;15	66929321;66933864;66936253;66937198;66937867;66938643;66940143;66942012;66943065;66944004;66944776;66946432;66948379;66959362;66960472;66969504	66931108;66933915;66936288;66937245;66937918;66938699;66940246;66942068;66943151;66944064;66944838;66946552;66948484;66959397;66960552;66969640	-;-;-;-;-;-;-;-;-;-;-;-;-;-;-;-	2886	20	132	179	65	54	58	37	26	508	641	371	509	544	557
ENSMUST00000005262	4930550C14Rik	9;9;9;9;9;9;9;9;9	53405286;53408053;53411747;53414339;53421569;53422888;53425523;53428135;53432403	53405325;53408142;53411839;53414392;53421769;53423018;53425693;53428190;53432803	+;+;+;+;+;+;+;+;+	1237	6	4	5	3	4	2	0	1	46	43	10	25	23	18
ENSMUST00000005279	Klf5	14;14;14;14	99298691;99301381;99303418;99313151	99299222;99302254;99303477;99313405	+;+;+;+	1721	6	52	69	22	11	13	0	16	19	35	84	39	35	32
ENSMUST00000005292	Prdx2	8;8;8;8;8;8	84969611;84970240;84970436;84971287;84971562;84974000	84969762;84970344;84970589;84971409;84971692;84974834	+;+;+;+;+;+	1500	0	0	0	0	0	0	0	0	0	0	0	0	0	0
ENSMUST00000005334	Shbg	11;11;11;11;11;11;11;11	69614804;69615520;69616032;69616337;69616692;69617142;69617494;69617749	69615116;69615727;69616168;69616496;69616853;69617331;69617585;69617905	-;-;-;-;-;-;-;-	1419	0	0	0	0	0	0	0	0	0	1	0	0	0	0
ENSMUST00000005336	Senp3	11;11;11;11;11;11;11;11;11;11;11	69673115;69674047;69674202;69674469;69677090;69677973;69678137;69678622;69678822;69680143;69681663	69673636;69674097;69674285;69674606;69677167;69678020;69678284;69678733;69679061;69680850;69681846	-;-;-;-;-;-;-;-;-;-;-	2313	39	19	31	21	37	35	15	10	16	3	0	3	2	23
ENSMUST00000005352	Corin	5;5;5;5;5;5;5;5;5;5;5;5;5;5;5;5;5;5;5;5;5;5	72300026;72302791;72304875;72316024;72316342;72319522;72329612;72330811;72332668;72338961;72339841;72342886;72353870;72356876;72358374;72360651;72372098;72422025;72435235;72454306;72471849;72503882	72301680;72302924;72305146;72316198;72316391;72319635;72329741;72330921;72332781;72339068;72339986;72343117;72353977;72356992;72358484;72360758;72372211;72422209;72435442;72454506;72471990;72504208	-;-;-;-;-;-;-;-;-;-;-;-;-;-;-;-;-;-;-;-;-;-	4862	0	0	0	0	0	0	0	0	0	0	0	0	0	0
ENSMUST00000005364	G6pc2	2;2;2;2;2	69219971;69220783;69222932;69225812;69226568	69220250;69220892;69223043;69225927;69227841	+;+;+;+;+	1892	0	0	0	0	0	0	0	0	0	0	0	0	0	0
ENSMUST00000005365	Spc25	2;2;2;2;2;2;2	69193895;69197135;69199985;69202572;69204856;69205026;69206064	69194545;69197233;69200089;69202718;69204921;69205178;69206194	-;-;-;-;-;-;-	1352	0	0	0	0	0	0	0	0	0	0	0	0	0	0
ENSMUST00000005371	Trp53	11;11;11;11;11;11;11;11;11;11;11	69580359;69586891;69587257;69587372;69588364;69588626;69589141;69589573;69589789;69590656;69591350	69580515;69586973;69587278;69587632;69588547;69588738;69589250;69589709;69589862;69590762;69591873	+;+;+;+;+;+;+;+;+;+;+	1772	0	0	0	0	0	0	0	0	0	0	0	0	0	0
ENSMUST00000005394	Ufd1	16;16;16;16;16;16;16;16;16;16;16;16	18812294;18814830;18815329;18817903;18821039;18823223;18824988;18825753;18826255;18827018;18827636;18834236	18812417;18814962;18815361;18818024;18821169;18823295;18825056;18825818;18826302;18827106;18827717;18835261	+;+;+;+;+;+;+;+;+;+;+;+	1996	0	0	0	0	0	0	0	0	0	0	0	0	0	0
ENSMUST00000005399	Zfp287	11;11;11;11;11	62713287;62724797;62725248;62727550;62728282	62715376;62724883;62725374;62727653;62729093	-;-;-;-;-	3220	18	13	18	14	15	20	7	7	23	10	0	8	9	28
ENSMUST00000005400	Prlr	15;15;15;15;15;15;15;15;15	10177238;10293651;10314165;10317503;10319175;10322386;10325271;10325867;10328281	10177871;10293710;10314273;10317635;10319344;10322555;10325412;10326545;10329388	+;+;+;+;+;+;+;+;+	3205	0	0	0	0	0	0	0	0	0	1	0	1	0	0
ENSMUST00000005406	App	16;16;16;16;16;16;16;16;16;16;16;16;16;16;16;16	84954440;84962722;84965670;84971408;84978064;85013627;85015232;85024853;85025423;85030232;85056324;85079840;85082776;85103206;85120530;85173502	84955432;84962868;84965770;84971461;84978285;85013726;85015360;85025011;85025497;85030365;85056526;85080033;85082888;85103335;85120697;85173707	-;-;-;-;-;-;-;-;-;-;-;-;-;-;-;-	3128	4258	3944	4433	3697	4290	4202	3014	2784	4564	4042	998	3715	3330	5139
ENSMUST00000005413	Zfp112	7;7;7;7;7	24112324;24118335;24122234;24123919;24124835	24112436;24118383;24122360;24124014;24127493	+;+;+;+;+	3044	0	0	0	0	0	0	0	0	0	0	0	0	0	1
ENSMUST00000005431	Letm1	5;5;5;5;5;5;5;5;5;5;5;5;5;5	33739673;33743642;33745016;33746240;33747376;33748161;33748742;33752492;33760723;33761580;33762459;33769361;33778608;33782474	33742612;33743780;33745203;33746374;33747510;33748301;33748873;33752611;33760926;33761717;33762602;33769811;33778668;33782817	-;-;-;-;-;-;-;-;-;-;-;-;-;-	5272	832	674	781	500	777	793	288	302	1834	1497	612	1398	1265	1892
ENSMUST00000005452	Fgfr4	13;13;13;13;13;13;13;13;13;13;13;13;13;13;13;13;13;13	55152640;55155438;55156231;55156586;55156774;55159094;55159923;55160249;55161116;55161394;55161622;55165890;55166096;55166858;55167088;55167400;55167806;55168026	55152927;55155571;55156494;55156666;55156940;55159217;55160113;55160387;55161309;55161539;55161743;55166000;55166286;55166980;55167158;55167537;55167911;55168759	+;+;+;+;+;+;+;+;+;+;+;+;+;+;+;+;+;+	3324	0	3	1	2	2	0	0	0	1	3	5	3	3	4
ENSMUST00000005470	Cadm3	1;1;1;1;1;1;1;1;1;1	173335987;173338020;173341054;173341669;173344320;173344920;173345745;173346422;173349022;173367413	173337139;173338145;173341223;173341759;173344490;173345057;173345897;173346562;173349123;173367685	-;-;-;-;-;-;-;-;-;-	2518	0	0	0	0	0	0	0	0	0	0	0	0	0	0
ENSMUST00000005477	Cyp2b10	7;7;7;7;7;7;7;7;7;7	25897676;25911238;25911554;25913865;25914748;25915392;25916934;25917288;25925373;25926068	25897855;25911400;25911703;25914025;25914924;25915533;25917121;25917429;25925399;25926559	+;+;+;+;+;+;+;+;+;+	1822	0	0	0	0	0	0	0	0	0	0	0	0	0	0
ENSMUST00000005487	Txn2	15;15;15;15	77915047;77924543;77927692;77928907	77915857;77924666;77927954;77929006	-;-;-;-	1298	1	0	0	0	1	0	0	1	7	4	5	6	3	4
ENSMUST00000005488	Casp14	10;10;10;10;10;10;10	78711997;78713990;78714248;78714935;78715261;78715820;78718107	78713441;78714093;78714397;78715160;78715410;78715886;78718293	-;-;-;-;-;-;-	2329	0	0	0	0	0	0	0	0	0	0	0	0	0	0
ENSMUST00000005490	Slc1a6	10;10;10;10;10;10;10;10;10;10	78780496;78787762;78788959;78791165;78793290;78795924;78800029;78801802;78812802;78814420	78780681;78787964;78789096;78791369;78793332;78796267;78800262;78801996;78812936;78814825	+;+;+;+;+;+;+;+;+;+	2089	0	4	1	0	1	0	3	0	5	6	3	7	1	4
ENSMUST00000005493	Slc1a3	15;15;15;15;15;15;15;15;15;15	8634124;8639056;8642182;8642900;8645660;8649543;8650849;8688288;8708562;8710339	8636339;8639190;8642376;8643133;8645952;8649585;8651053;8688425;8708839;8710764	-;-;-;-;-;-;-;-;-;-	4163	1	6	6	3	3	4	0	0	32	29	13	36	22	18
ENSMUST00000005503	Msh6	17;17;17;17;17;17;17;17;17;17	87975050;87980191;87983445;87984446;87988186;87989144;87989427;87990194;87990431;87990724	87975405;87980390;87983614;87986981;87988454;87989261;87989516;87990348;87990630;87990883	+;+;+;+;+;+;+;+;+;+	4254	261	250	359	234	260	294	114	125	952	972	300	848	860	1389
ENSMUST00000005504	Fbxo11	17;17;17;17;17;17;17;17;17;17;17;17;17;17;17;17;17;17;17;17;17;17;17	87990859;87992258;87992819;87993147;87993737;87996036;87996267;87997331;87997513;87999533;88000772;88002752;88008594;88008816;88009010;88009204;88010936;88011293;88012557;88014406;88015399;88015588;88065009	87992175;87992356;87992927;87993254;87993847;87996179;87996343;87997416;87997635;87999627;88000857;88002969;88008731;88008922;88009121;88009310;88011068;88011376;88012686;88014550;88015480;88015712;88065291	-;-;-;-;-;-;-;-;-;-;-;-;-;-;-;-;-;-;-;-;-;-;-	4019	7	7	7	0	11	7	2	3	0	1	0	3	0	2
ENSMUST00000005507	Mlxipl	5;5;5;5;5;5;5;5;5;5;5;5;5;5;5;5;5	135106902;135113627;135121506;135121736;135122070;135123650;135123937;135128513;135132315;135133109;135133252;135133544;135133754;135133994;135134487;135135351;135137242	135107215;135113733;135121588;135121825;135122114;135123851;135124017;135128697;135132861;135133176;135133408;135133659;135133873;135134121;135134610;135135480;135138382	+;+;+;+;+;+;+;+;+;+;+;+;+;+;+;+;+	3638	0	4	0	0	1	1	0	0	2	2	3	1	1	0
ENSMUST00000005508	Tbl2	5;5;5;5;5;5	135149686;135152935;135154314;135157532;135158604;135159220	135149864;135153056;135154498;135157658;135158756;135159821	+;+;+;+;+;+	1368	0	0	0	0	0	0	0	0	0	0	0	0	0	0
ENSMUST00000005509	Stx1a	5;5;5;5;5;5;5;5;5;5	135023482;135037126;135037476;135041237;135041931;135042109;135042593;135045597;135048994;135049827	135023610;135037203;135037575;135041311;135042004;135042217;135042666;135045734;135049104;135051100	+;+;+;+;+;+;+;+;+;+	2162	0	1	1	0	0	1	0	0	1	0	0	0	0	0
ENSMUST00000005518	Kmt5b	19;19;19;19;19;19;19;19;19	3768118;3786389;3793068;3796640;3802075;3802788;3804395;3804814;3804917	3768340;3786627;3793215;3796708;3802240;3802897;3804561;3804833;3805057	+;+;+;+;+;+;+;+;+	1283	0	0	0	0	0	0	0	0	0	0	0	0	0	0
ENSMUST00000005532	Nid1	13;13;13;13;13;13;13;13;13;13;13;13;13;13;13;13;13;13;13;13	13437602;13463722;13465310;13468231;13472780;13476159;13478138;13482018;13483650;13486639;13489006;13490045;13499559;13500446;13502399;13506336;13507610;13508718;13509433;13509946	13437926;13464021;13465536;13468607;13472929;13476410;13478338;13482263;13483793;13486764;13489155;13490167;13499786;13500618;13502525;13506507;13507767;13508841;13509545;13512275	+;+;+;+;+;+;+;+;+;+;+;+;+;+;+;+;+;+;+;+	6046	28	25	33	21	35	46	15	5	246	290	168	255	231	345
ENSMUST00000005548	Hmox1	8;8;8;8;8	75093591;75095856;75096850;75098766;75099886	75093772;75095976;75097341;75098865;75100596	+;+;+;+;+	1606	298	226	307	188	431	336	113	165	983	803	340	943	789	756
ENSMUST00000005578	Cic	7;7;7;7;7;7;7;7;7;7;7;7;7;7;7;7;7;7;7;7	25282179;25284849;25285079;25285410;25285634;25285898;25286807;25287101;25287750;25288074;25289388;25290571;25290799;25291052;25291450;25292064;25292417;25292650;25292956;25293168	25282916;25284998;25285313;25285539;25285816;25286063;25287009;25287326;25287853;25289301;25289575;25290692;25290965;25291342;25291769;25292314;25292568;25292781;25293087;25294148	+;+;+;+;+;+;+;+;+;+;+;+;+;+;+;+;+;+;+;+	6099	0	0	0	0	0	0	0	0	0	0	0	0	0	0
ENSMUST00000005583	Pafah1b3	7;7;7;7;7;7	25295049;25296121;25296321;25297086;25297372;25297843	25295376;25296243;25296437;25297175;25297470;25297986	-;-;-;-;-;-	901	0	0	0	0	1	0	0	0	1	0	0	0	0	1
ENSMUST00000005592	Siglecg	7;7;7;7;7;7;7;7;7;7;7;7	43408204;43408506;43408731;43409243;43410509;43410943;43411414;43411562;43411890;43412432;43412615;43417811	43408370;43408599;43409108;43409521;43410556;43411206;43411461;43411819;43412174;43412519;43412726;43418358	+;+;+;+;+;+;+;+;+;+;+;+	2569	0	0	0	0	0	0	0	0	0	0	0	0	0	0
ENSMUST00000005597	Zfp658	7;7;7;7	43564784;43567268;43567645;43572589	43564843;43567394;43567743;43574966	+;+;+;+	2664	0	0	0	0	0	0	0	0	0	0	0	0	0	0
ENSMUST00000005600	Rfx1	8;8;8;8;8;8;8;8;8;8;8;8;8;8;8;8;8;8;8;8;8	84066836;84073731;84079863;84080125;84081115;84082648;84084082;84085573;84087706;84090111;84090950;84091366;84092535;84092780;84092974;84093203;84094727;84094950;84095396;84095628;84095797	84067048;84074069;84079972;84080208;84081222;84082761;84084174;84085667;84088072;84090292;84091069;84091478;84092653;84092889;84093125;84093300;84094876;84095158;84095549;84095673;84096992	+;+;+;+;+;+;+;+;+;+;+;+;+;+;+;+;+;+;+;+;+	4172	430	404	519	329	447	390	132	119	921	802	367	738	692	1106
ENSMUST00000005601	Il27ra	8;8;8;8;8;8;8;8;8;8;8;8;8;8	84030287;84031313;84031519;84032017;84033951;84034192;84036085;84036363;84039296;84039478;84040674;84040932;84042087;84042450	84031192;84031421;84031609;84032142;84034109;84034293;84036273;84036546;84039369;84039634;84040831;84041089;84042204;84042575	-;-;-;-;-;-;-;-;-;-;-;-;-;-	2657	0	8	12	0	0	0	0	1	2	1	4	9	4	1
ENSMUST00000005606	Prkaca	8;8;8;8;8;8;8;8;8;8	83972978;83980774;83981172;83986837;83988283;83990428;83990642;83990863;83994795;83995292	83973232;83980835;83981300;83986935;83988365;83990554;83990737;83990985;83994959;83996445	+;+;+;+;+;+;+;+;+;+	2293	1750	1658	1904	1460	1738	1594	834	864	2420	2177	551	1899	1685	2580
ENSMUST00000005607	Asf1b	8;8;8;8	83955507;83965031;83967834;83969134	83955937;83965146;83968010;83970197	+;+;+;+	1788	8	25	76	13	5	9	4	17	48	50	31	38	33	46
ENSMUST00000005611	Myl10	5;5;5;5;5;5	136693146;136694235;136695355;136697933;136700702;136700855	136693418;136694310;136695459;136698011;136700750;136701094	+;+;+;+;+;+	822	0	0	0	0	2	0	1	1	0	0	0	0	1	0
ENSMUST00000005616	Pkn1	8;8;8;8;8;8;8;8;8;8;8;8;8;8;8;8;8;8;8;8;8;8	83669762;83670739;83670922;83671299;83671717;83671907;83672156;83673302;83673481;83673631;83677524;83677706;83677931;83680954;83681180;83683399;83684003;83684636;83687040;83691049;83692636;83698967	83670368;83670819;83671029;83671441;83671793;83671969;83672332;83673393;83673556;83673710;83677617;83677847;83678006;83681097;83681289;83683593;83684216;83684781;83687184;83691200;83692936;83699179	-;-;-;-;-;-;-;-;-;-;-;-;-;-;-;-;-;-;-;-;-;-	3436	0	0	0	0	0	0	0	0	0	0	0	0	0	0
ENSMUST00000005620	Dnajb1	8;8;8	83608175;83609814;83610589	83608542;83610394;83611902	+;+;+	2263	509	477	708	469	360	446	211	243	1467	1351	163	726	927	1621
ENSMUST00000005630	Msh4	3;3;3;3;3;3;3;3;3;3;3;3;3;3;3;3;3;3;3;3	153857149;153860888;153863339;153866321;153867724;153869564;153872266;153873626;153874657;153876628;153877909;153879359;153883731;153886818;153888690;153890113;153896825;153897285;153901406;153905672	153857634;153860976;153863513;153866449;153867842;153869764;153872390;153873729;153874793;153876797;153877973;153879433;153883798;153886990;153888863;153890228;153896935;153897442;153901588;153906138	-;-;-;-;-;-;-;-;-;-;-;-;-;-;-;-;-;-;-;-	3325	0	0	0	0	0	0	0	0	0	0	0	1	0	0
ENSMUST00000005643	Celf1	2;2;2;2;2;2;2;2;2;2;2;2;2;2;2	90940397;90987665;90998580;91001006;91001462;91003211;91003811;91004701;91006620;91008172;91009205;91010393;91012699;91013238;91016566	90940641;90987816;90998767;91001088;91001510;91003345;91003890;91004862;91006695;91008300;91009315;91010578;91012842;91013402;91019490	+;+;+;+;+;+;+;+;+;+;+;+;+;+;+	4830	0	0	0	0	0	0	0	0	0	0	0	0	0	0
ENSMUST00000005647	Ndufs3	2;2;2;2;2;2;2	90894636;90898384;90898637;90902363;90902847;90904423;90904584	90894877;90898503;90898762;90902512;90902944;90904488;90904827	-;-;-;-;-;-;-	1046	0	0	0	0	1	0	0	0	2	0	0	0	0	0
ENSMUST00000005651	Por	5;5;5;5;5;5;5;5;5;5;5;5;5;5;5;5	135689036;135715872;135728662;135729399;135730229;135730844;135731093;135731563;135732483;135732686;135733502;135733773;135734027;135734383;135734621;135734813	135689252;135716063;135728710;135729527;135730378;135730968;135731182;135731661;135732599;135732804;135733683;135733922;135734297;135734528;135734706;135735326	+;+;+;+;+;+;+;+;+;+;+;+;+;+;+;+	2636	0	0	0	0	0	0	0	0	0	0	0	0	0	0
ENSMUST00000005669	Cyp2b13	7;7;7;7;7;7;7;7;7	26061495;26080598;26080890;26081649;26085853;26086482;26088245;26088601;26095640	26061690;26080760;26081039;26081809;26086029;26086623;26088432;26088742;26096196	+;+;+;+;+;+;+;+;+	1876	0	1	1	0	0	0	0	0	1	2	0	4	5	7
ENSMUST00000005671	Igf1r	7;7;7;7;7;7;7;7;7;7;7;7;7;7;7;7;7;7;7;7;7	67952859;68003810;68164993;68169897;68173231;68183344;68184731;68186990;68189573;68189946;68193347;68194969;68195590;68201244;68201902;68207251;68207763;68211994;68214919;68218402;68226020	67952952;68004355;68165305;68170048;68173375;68183558;68184857;68187228;68189740;68190150;68193630;68195105;68195749;68201346;68201972;68207480;68207873;68212156;68215048;68218536;68226780	+;+;+;+;+;+;+;+;+;+;+;+;+;+;+;+;+;+;+;+;+	4489	431	401	481	312	494	509	159	112	551	384	97	307	264	486
ENSMUST00000005678	Fcer2a	8;8;8;8;8;8;8;8;8;8;8;8	3681737;3683338;3683566;3687920;3688117;3688287;3688534;3688798;3689777;3690022;3691119;3694084	3683008;3683444;3683717;3688009;3688179;3688349;3688596;3688860;3689830;3690141;3691221;3694174	-;-;-;-;-;-;-;-;-;-;-;-	2241	1	6	15	2	5	0	1	0	5	2	2	2	6	7
ENSMUST00000005685	Cyp2a5	7;7;7;7;7;7;7;7;7	26835305;26835795;26836675;26837091;26838868;26840360;26840937;26841728;26842878	26835543;26835957;26836824;26837251;26839044;26840501;26841124;26841869;26843528	+;+;+;+;+;+;+;+;+	2013	99	152	199	197	118	123	84	92	325	307	129	283	282	336
ENSMUST00000005692	Atp4a	7;7;7;7;7;7;7;7;7;7;7;7;7;7;7;7;7;7;7;7;7;7	30712209;30712354;30712609;30713084;30714971;30715319;30715741;30716535;30717052;30717236;30717691;30718979;30719993;30720217;30720467;30720726;30722492;30722920;30724193;30724658;30724855;30725156	30712262;30712494;30712668;30713287;30715084;30715571;30716009;30716733;30717161;30717370;30717883;30719154;30720129;30720367;30720635;30720880;30722615;30723065;30724326;30724759;30724946;30725535	+;+;+;+;+;+;+;+;+;+;+;+;+;+;+;+;+;+;+;+;+;+	3498	0	0	0	0	0	0	0	0	0	0	0	0	0	0
ENSMUST00000005705	Trim28	7;7;7;7;7;7;7;7;7;7;7;7;7;7;7;7;7	13024152;13025304;13025644;13027617;13027833;13028021;13028408;13028664;13028881;13029088;13029207;13029343;13029676;13030083;13030289;13030455;13030689	13025061;13025416;13025776;13027752;13027949;13028135;13028554;13028778;13028987;13029124;13029252;13029595;13029995;13030206;13030375;13030592;13031035	+;+;+;+;+;+;+;+;+;+;+;+;+;+;+;+;+	3245	208	181	278	168	196	232	81	93	147	100	22	106	56	268
ENSMUST00000005711	Chmp2a	7;7;7;7;7;7	13032006;13032289;13032435;13032642;13033829;13034635	13032202;13032350;13032565;13032821;13034042;13034777	-;-;-;-;-;-	927	807	735	882	671	781	821	458	517	1495	1429	506	1323	1420	1470
ENSMUST00000005714	Ube2m	7;7;7;7;7;7	13035238;13035842;13036212;13036434;13036566;13037621	13035754;13035905;13036315;13036472;13036660;13038273	-;-;-;-;-;-	1472	1	2	8	7	4	5	1	2	77	58	0	37	37	84
ENSMUST00000005719	Adcy9	16;16;16;16;16;16;16;16;16;16	4287545;4294663;4297409;4298687;4304377;4307156;4311525;4312685;4323767;4417853	4289089;4294704;4297557;4298846;4304585;4307258;4311742;4312789;4323957;4419587	-;-;-;-;-;-;-;-;-;-	4457	0	0	0	0	0	0	0	0	0	0	0	0	0	0
ENSMUST00000005722	Mef2c	13;13;13;13;13;13;13;13;13;13;13	83504034;83520385;83575538;83592778;83625470;83633055;83635422;83652814;83655507;83656217;83662403	83504376;83520480;83575730;83592981;83625607;83633241;83635469;83652986;83655636;83656352;83667079	+;+;+;+;+;+;+;+;+;+;+	6325	0	0	0	0	0	0	0	0	0	0	0	0	0	0
ENSMUST00000005749	Ctr9	7;7;7;7;7;7;7;7;7;7;7;7;7;7;7;7;7;7;7;7;7;7;7;7;7	111028951;111030214;111033691;111034348;111035288;111038386;111040555;111042816;111043026;111043417;111043614;111043836;111045377;111046254;111046516;111046763;111049264;111049510;111050434;111050945;111051450;111052302;111053382;111053814;111055359	111029181;111030312;111033930;111034465;111035377;111038534;111040662;111042923;111043262;111043506;111043742;111044019;111045465;111046439;111046603;111046911;111049380;111049655;111050505;111051080;111051596;111052459;111053478;111053926;111056377	+;+;+;+;+;+;+;+;+;+;+;+;+;+;+;+;+;+;+;+;+;+;+;+;+	4300	517	421	571	356	492	453	253	213	1921	1863	618	1727	1649	2041
ENSMUST00000005751	Mrvi1	7;7;7;7;7;7;7;7;7;7;7;7;7;7;7;7;7;7;7;7;7	110868270;110876839;110878142;110885756;110887941;110888534;110895794;110898906;110899674;110902253;110905427;110921314;110923461;110924312;110924535;110925255;110926343;110927801;110929478;110945833;110982013	110871602;110876976;110878261;110885820;110888048;110888583;110895935;110899037;110899814;110902283;110905550;110921392;110924072;110924359;110924587;110925332;110926516;110927871;110929578;110945981;110982461	-;-;-;-;-;-;-;-;-;-;-;-;-;-;-;-;-;-;-;-;-	6198	0	0	0	0	0	0	0	0	0	0	0	0	0	0
ENSMUST00000005768	Pip5k1a	3;3;3;3;3;3;3;3;3;3;3;3;3;3;3	95058569;95060484;95063655;95064331;95065421;95065812;95067382;95068061;95070712;95071890;95072403;95073993;95078102;95082791;95106376	95060085;95060529;95063784;95064474;95065505;95065860;95067465;95068266;95071011;95072042;95072520;95074123;95078182;95082822;95106779	-;-;-;-;-;-;-;-;-;-;-;-;-;-;-	3480	0	0	0	0	0	0	0	0	0	0	0	0	0	0
ENSMUST00000005769	Tmod4	3;3;3;3;3;3;3;3;3;3	95124514;95125515;95125820;95126411;95127340;95127589;95127804;95128269;95128600;95129088	95124578;95125677;95125976;95126527;95127429;95127719;95127911;95128412;95128744;95129209	+;+;+;+;+;+;+;+;+;+	1242	0	0	0	0	0	0	0	0	0	0	0	0	0	0
ENSMUST00000005791	Cabp5	7;7;7;7;7;7	13398132;13400705;13401231;13403308;13405400;13407783	13398370;13400735;13401374;13403417;13405547;13408887	+;+;+;+;+;+	1777	0	0	0	0	0	0	0	0	0	0	0	0	0	0
ENSMUST00000005798	Snx6	12;12;12;12;12;12;12;12;12;12;12;12;12;12	54746349;54751782;54751941;54754290;54757036;54760399;54763620;54765584;54768019;54770719;54783403;54784015;54795454;54795648	54747059;54751867;54752100;54754376;54757075;54760474;54763725;54765679;54768142;54770840;54783513;54784119;54795501;54795703	-;-;-;-;-;-;-;-;-;-;-;-;-;-	1928	896	802	957	688	839	849	425	543	2401	2231	724	2125	2073	2411
ENSMUST00000005810	Mthfd2	6;6;6;6;6;6;6;6	83305691;83308933;83309462;83310412;83311210;83311812;83313362;83317429	83306809;83309058;83309554;83310519;83311362;83311934;83313546;83317606	-;-;-;-;-;-;-;-	2085	203	195	263	160	189	202	85	91	911	872	637	745	734	894
ENSMUST00000005815	Kit	5;5;5;5;5;5;5;5;5;5;5;5;5;5;5;5;5;5;5;5;5	75574955;75607026;75609270;75610807;75615319;75620847;75622989;75637294;75638965;75640493;75640699;75641110;75641327;75645836;75647748;75648387;75649547;75652550;75652757;75653220;75654414	75575118;75607298;75609551;75610943;75615493;75621036;75623104;75637408;75639158;75640599;75640825;75641214;75641437;75645986;75647836;75648514;75649669;75652661;75652856;75653325;75656722	+;+;+;+;+;+;+;+;+;+;+;+;+;+;+;+;+;+;+;+;+	5214	0	0	0	0	0	0	0	0	0	0	0	0	0	0
ENSMUST00000005817	Tomm40l	1;1;1;1;1;1;1;1;1;1	171217802;171219794;171220109;171220301;171220547;171220805;171221168;171221572;171221904;171222375	171219660;171219896;171220185;171220423;171220652;171220906;171221260;171221639;171222153;171222514	-;-;-;-;-;-;-;-;-;-	2921	0	0	0	0	0	0	0	0	0	0	0	1	0	1
ENSMUST00000005820	Nr1i3	1;1;1;1;1;1;1;1;1	171213970;171214343;171214944;171216379;171216746;171217076;171217314;171217626;171218589	171214173;171214485;171215074;171216548;171216885;171217221;171217430;171217731;171218845	+;+;+;+;+;+;+;+;+	1414	0	0	0	0	0	0	0	0	0	0	0	0	0	0
ENSMUST00000005824	Apoa2	1;1;1;1	171225082;171225284;171225666;171226143	171225121;171225366;171225798;171226378	+;+;+;+	492	0	0	0	0	0	0	0	0	0	0	0	0	0	0
ENSMUST00000005825	Pan2	10;10;10;10;10;10;10;10;10;10;10;10;10;10;10;10;10;10;10;10;10;10;10;10;10;10	128303335;128304095;128308065;128308336;128308604;128309037;128310171;128310704;128312878;128313141;128313615;128313842;128314183;128314448;128314726;128314923;128315098;128315487;128315776;128316431;128317634;128317890;128318163;128318945;128320248;128320734	128303471;128304493;128308234;128308456;128308681;128309304;128310513;128310800;128312994;128313260;128313743;128314041;128314316;128314554;128314824;128314993;128315236;128315657;128315835;128316521;128317791;128318033;128318342;128319038;128320445;128321358	+;+;+;+;+;+;+;+;+;+;+;+;+;+;+;+;+;+;+;+;+;+;+;+;+;+	4450	1187	1115	1277	1038	1316	1138	337	258	1265	1123	399	1059	957	1487
ENSMUST00000005826	Cs	10;10;10;10;10;10;10;10;10;10;10	128337832;128349753;128350433;128351199;128352674;128353023;128358334;128359170;128359434;128359944;128360968	128337959;128349803;128350540;128351264;128352805;128353211;128358533;128359299;128359535;128360153;128362479	+;+;+;+;+;+;+;+;+;+;+	2828	2716	2409	2798	2185	2544	2666	1354	1376	3337	2893	966	2788	2621	3664
ENSMUST00000005829	Ampd3	7;7;7;7;7;7;7;7;7;7;7;7;7;7;7	110772604;110777799;110788610;110791188;110793640;110795679;110800643;110802432;110803081;110803727;110804825;110805964;110807780;110809796;110810734	110772896;110778024;110788814;110791347;110793859;110795808;110800837;110802563;110803244;110803853;110804988;110806084;110807953;110809906;110812405	+;+;+;+;+;+;+;+;+;+;+;+;+;+;+	4094	0	7	9	2	2	1	3	0	32	35	6	25	29	42
ENSMUST00000005830	Bcas2	3;3;3;3;3;3;3	103171655;103171948;103173275;103174340;103175619;103177339;103178355	103171865;103172040;103173345;103174501;103175669;103177419;103179152	+;+;+;+;+;+;+	1467	0	0	0	0	0	0	0	0	0	0	0	0	0	0
ENSMUST00000005839	Sh2d1a	X;X;X;X	42502562;42515287;42520643;42521715	42502859;42515350;42520784;42522093	+;+;+;+	883	0	0	0	0	0	0	0	0	0	0	0	0	0	0
ENSMUST00000005841	Ctcf	8;8;8;8;8;8;8;8;8;8;8;8	105636579;105643516;105663754;105664856;105666659;105670231;105671291;105674869;105675996;105677215;105680071;105681435	105636720;105643632;105664543;105665026;105666792;105670351;105671440;105675029;105676178;105677350;105680259;105682922	+;+;+;+;+;+;+;+;+;+;+;+	3782	509	425	575	335	504	429	239	181	1754	1701	538	1543	1591	1772
ENSMUST00000005849	Agrp	8;8;8;8;8	105566700;105567120;105567360;105567606;105568216	105566938;105567202;105567492;105567726;105568298	-;-;-;-;-	659	9	12	19	9	18	12	3	5	18	16	28	15	9	20
ENSMUST00000005860	Pvalb	15;15;15;15	78191114;78201226;78202521;78204085	78191694;78201335;78202653;78204237	-;-;-;-	977	0	0	0	0	0	0	0	0	0	2	0	0	0	0
ENSMUST00000005862	Tfap4	16;16;16;16;16;16;16	4544661;4547255;4549331;4551230;4551746;4551935;4559428	4545747;4547410;4549471;4551400;4551844;4552100;4559720	-;-;-;-;-;-;-	2113	21	37	72	35	39	27	15	13	124	191	185	187	164	162
ENSMUST00000005889	Vav1	17;17;17;17;17;17;17;17;17;17;17;17;17;17;17;17;17;17;17;17;17;17;17;17;17;17;17	57279100;57295982;57296552;57296700;57297049;57297246;57298772;57299101;57299842;57301181;57301861;57302074;57302265;57303015;57303834;57304824;57305280;57305459;57305663;57306107;57307034;57309452;57311784;57315244;57318628;57324642;57327651	57279401;57296098;57296610;57296768;57297157;57297341;57298840;57299204;57299941;57301276;57301929;57302160;57302350;57303147;57303943;57304925;57305377;57305481;57305708;57306243;57307099;57309483;57311900;57315331;57318742;57324793;57328031	+;+;+;+;+;+;+;+;+;+;+;+;+;+;+;+;+;+;+;+;+;+;+;+;+;+;+	2963	0	0	0	0	0	0	0	0	0	0	0	0	0	0
ENSMUST00000005891	Klk9	7;7;7;7;7	43791891;43792179;43794264;43795552;43795991	43792039;43792335;43794529;43795688;43796756	+;+;+;+;+	1475	0	0	0	0	0	0	0	0	0	0	1	0	0	0
ENSMUST00000005907	Cd247	1;1;1;1;1;1;1;1	165788689;165855166;165856400;165857416;165858443;165859219;165859789;165861004	165788886;165855269;165856456;165857496;165858478;165859275;165859824;165862066	+;+;+;+;+;+;+;+	1632	0	2	6	0	0	0	0	2	3	3	0	4	8	4
ENSMUST00000005923	Psmb4	3;3;3;3;3;3;3	94884093;94884671;94884917;94885660;94886075;94886441;94886769	94884440;94884759;94885033;94885741;94886221;94886647;94886961	-;-;-;-;-;-;-	1183	4	0	0	3	1	2	1	4	28	31	14	27	29	40
ENSMUST00000005933	Klk1b16	7;7;7;7;7	44136767;44139391;44140514;44140896;44141406	44137364;44139550;44140800;44141032;44141607	+;+;+;+;+	1384	0	0	0	0	0	0	0	0	0	0	0	0	0	0
ENSMUST00000005950	Mmp12	9;9;9;9;9;9;9;9;9;9	7347374;7348585;7349723;7350012;7352888;7353446;7354722;7355312;7357805;7358227	7347538;7348832;7349871;7350137;7353049;7353569;7354855;7355471;7357908;7360461	+;+;+;+;+;+;+;+;+;+	3607	0	0	0	0	0	0	0	0	0	0	0	0	0	0
ENSMUST00000005952	Slc30a4	2;2;2;2;2;2;2	122681233;122685998;122686951;122687864;122689399;122694395;122702030	122685333;122686132;122687056;122688068;122689552;122694541;122702639	-;-;-;-;-;-;-	5458	17	27	32	32	31	38	15	18	500	708	577	724	590	867
ENSMUST00000005953	Sqor	2;2;2;2;2;2;2;2;2;2	122765237;122784944;122787458;122792350;122798038;122799762;122803922;122807573;122807954;122809281	122765439;122785194;122787628;122792403;122798232;122799971;122804105;122807640;122808132;122809569	+;+;+;+;+;+;+;+;+;+	1804	0	0	0	0	0	0	0	0	1	0	0	0	0	0
ENSMUST00000005954	Bloc1s6	2;2;2;2;2	122738503;122742589;122744126;122746055;122746511	122738704;122742730;122744213;122746141;122749475	+;+;+;+;+	3484	9	29	40	26	27	43	16	22	208	210	75	85	125	76
ENSMUST00000005964	Adh5	3;3;3;3;3;3;3;3;3	138443093;138445290;138447083;138447852;138450899;138451244;138453742;138454668;138455085	138443193;138445391;138447224;138447939;138451118;138451504;138453877;138454806;138455499	+;+;+;+;+;+;+;+;+	1604	606	538	582	462	573	630	357	437	1143	1108	121	1097	1088	1140
ENSMUST00000005975	Gpr108	17;17;17;17;17;17;17;17;17;17;17;17;17;17;17;17;17	57234914;57235923;57236156;57236374;57236697;57236871;57237206;57237424;57237851;57238030;57242734;57242941;57244247;57245029;57245295;57246764;57247511	57235366;57236047;57236239;57236423;57236740;57237001;57237323;57237497;57237926;57238163;57242838;57243134;57244368;57245111;57245345;57246883;57247641	-;-;-;-;-;-;-;-;-;-;-;-;-;-;-;-;-	2095	931	889	980	714	927	990	397	363	1575	1366	535	1285	1259	1710
ENSMUST00000005976	Tnfsf14	17;17;17;17	57189492;57192559;57192903;57193857	57190938;57192600;57192939;57194189	-;-;-;-	1859	0	3	26	0	0	0	0	0	6	12	7	10	7	7
ENSMUST00000006005	Pth1r	9;9;9;9;9;9;9;9;9;9;9;9;9;9	110722088;110723586;110723710;110724399;110724727;110725113;110726443;110726970;110727411;110727678;110727898;110729595;110731538;110742226	110722634;110723627;110723851;110724493;110724793;110725173;110726596;110727165;110727505;110727796;110728008;110729729;110731640;110742610	-;-;-;-;-;-;-;-;-;-;-;-;-;-	2252	0	0	1	0	0	0	0	0	1	0	1	1	0	1
ENSMUST00000006020	Cnga2	X;X;X;X;X;X;X	71991849;72003270;72003939;72004873;72006111;72007732;72008116	71992191;72003405;72004034;72005043;72006218;72007838;72010218	+;+;+;+;+;+;+	3064	4254	3809	4182	3742	4167	4108	3153	3116	4512	4022	1435	3941	3671	4685
ENSMUST00000006027	Reep5	18;18;18;18;18	34344889;34349635;34357092;34372405;34373204	34347168;34349803;34357230;34372498;34373415	-;-;-;-;-	2894	62	364	464	130	134	104	64	69	764	1130	626	742	858	786
ENSMUST00000006029	Arhgap8	15;15;15;15;15;15;15;15;15;15;15;15;15	84720052;84730544;84732898;84740708;84741893;84745769;84756338;84757020;84765673;84766311;84767101;84769997;84771781	84720107;84730553;84733029;84740795;84742024;84745855;84756436;84757130;84765746;84766388;84767229;84770100;84772207	+;+;+;+;+;+;+;+;+;+;+;+;+	1527	0	0	0	0	0	0	0	0	0	0	0	0	0	0
ENSMUST00000006035	Ergic3	2;2;2;2;2;2;2;2;2;2;2;2;2	156008045;156008365;156008564;156008860;156010440;156011100;156011349;156015989;156016706;156016889;156017580;156017797;156018071	156008228;156008435;156008651;156008979;156010533;156011265;156011406;156016020;156016802;156016953;156017716;156017852;156018279	+;+;+;+;+;+;+;+;+;+;+;+;+	1377	1	0	0	0	0	0	0	0	0	0	0	0	0	1
ENSMUST00000006036	Uqcc1	2;2;2;2;2;2;2	155848240;155851359;155858112;155910357;155911741;155921635;155930013	155848526;155851472;155858189;155910464;155911836;155921727;155930044	-;-;-;-;-;-;-	808	0	0	0	0	0	0	0	0	0	0	0	0	0	0
ENSMUST00000006037	Ncoa2	1;1;1;1;1;1;1;1;1;1;1;1;1;1;1;1;1;1;1;1;1;1;1	13142475;13146875;13148317;13148931;13150690;13152379;13152797;13156370;13160161;13162073;13164896;13166896;13174079;13177074;13180481;13181216;13184175;13186733;13190087;13221307;13224609;13285969;13373938	13142772;13146964;13148515;13149108;13150918;13152456;13153075;13156535;13160290;13162288;13165102;13167106;13175348;13177221;13180624;13181317;13184363;13186910;13190190;13221479;13224713;13286025;13374083	-;-;-;-;-;-;-;-;-;-;-;-;-;-;-;-;-;-;-;-;-;-;-	4897	1	0	0	0	0	1	1	0	0	0	0	0	0	0
ENSMUST00000006046	Trh	6;6;6	92242061;92243672;92244548	92243125;92243887;92244650	-;-;-	1384	1	1	2	1	2	3	0	2	5	1	2	5	0	1
ENSMUST00000006053	Smpd4	16;16;16;16;16;16;16;16;16;16;16;16;16;16;16;16;16;16;16;16	17619354;17621442;17623905;17625720;17625944;17626430;17626639;17626802;17629069;17631986;17635482;17638496;17639274;17639745;17640126;17640865;17641362;17641698;17642169;17642474	17619434;17621525;17623991;17625862;17626019;17626538;17626691;17626953;17629198;17632057;17635568;17638641;17639364;17639845;17640289;17641061;17641595;17641829;17642297;17644828	+;+;+;+;+;+;+;+;+;+;+;+;+;+;+;+;+;+;+;+	4623	0	0	0	0	0	0	0	0	0	0	0	0	0	0
ENSMUST00000006061	Pex1	5;5;5;5;5;5;5;5;5;5;5;5;5;5;5;5;5;5;5;5;5;5;5	3596066;3603232;3604796;3605434;3605647;3609854;3610179;3612881;3615075;3618817;3620595;3622233;3623941;3624420;3626000;3627518;3629970;3630189;3631589;3633716;3635315;3635780;3636771	3596517;3603375;3604879;3605548;3606410;3609977;3610288;3612963;3615207;3618913;3620765;3622387;3624130;3624586;3626134;3627582;3630112;3630292;3631765;3633946;3635512;3635910;3637230	+;+;+;+;+;+;+;+;+;+;+;+;+;+;+;+;+;+;+;+;+;+;+	4433	0	0	0	0	0	0	0	0	0	0	0	0	0	0
ENSMUST00000006071	Otx1	11;11;11;11;11	21994764;21998370;21999380;22001122;22001548	21997058;21998521;21999585;22001189;22001615	-;-;-;-;-	2789	0	0	0	0	0	0	0	0	0	0	0	0	0	0
ENSMUST00000006094	Cyp2d26	15;15;15;15;15;15;15;15;15	82790107;82790456;82790970;82791333;82791658;82792469;82792708;82793126;82793985	82790355;82790597;82791157;82791474;82791834;82792629;82792860;82793297;82794245	-;-;-;-;-;-;-;-;-	1645	0	6	1	4	4	0	2	0	1	4	1	0	1	0
ENSMUST00000006101	Itgae	11;11;11;11;11;11;11;11;11;11;11;11;11;11;11;11;11;11;11;11;11;11;11;11;11;11;11;11;11;11;11	73090583;73103861;73110506;73111331;73111746;73112057;73112954;73113582;73114857;73115507;73116080;73117114;73118052;73118495;73119330;73120275;73121844;73123108;73125259;73126879;73129169;73130923;73131688;73132694;73133843;73133991;73138455;73138767;73140667;73145541;73147051	73090654;73103984;73110603;73111398;73111863;73112188;73113069;73113733;73115010;73115657;73116147;73117252;73118197;73118635;73119554;73120405;73121974;73123268;73125387;73126952;73129301;73131021;73131767;73132768;73133906;73134098;73138511;73138862;73140762;73145651;73147446	+;+;+;+;+;+;+;+;+;+;+;+;+;+;+;+;+;+;+;+;+;+;+;+;+;+;+;+;+;+;+	3845	0	4	14	0	0	3	0	1	3	8	2	1	3	5
ENSMUST00000006103	Ctns	11;11;11;11;11;11;11;11;11;11;11	73183596;73185238;73186289;73187522;73187737;73188430;73188689;73191678;73193055;73196638;73198918	73185051;73185355;73186459;73187641;73187836;73188561;73188792;73191762;73193133;73196717;73199042	-;-;-;-;-;-;-;-;-;-;-	2570	0	0	0	0	0	0	0	0	0	0	0	0	0	0
ENSMUST00000006104	P2rx5	11;11;11;11;11;11;11;11;11;11;11;11;11	73160421;73164856;73165540;73166143;73166305;73166562;73166913;73167494;73167879;73168089;73170416;73171083;73171765	73160733;73165006;73165611;73166218;73166401;73166642;73167051;73167627;73167972;73168154;73170498;73171250;73172685	+;+;+;+;+;+;+;+;+;+;+;+;+	2395	3	3	6	2	3	5	3	3	30	34	34	26	31	28
ENSMUST00000006105	Shpk	11;11;11;11;11;11;11	73199460;73203922;73213331;73214055;73214965;73217799;73222781	73199680;73204063;73213514;73214207;73215140;73217999;73224511	+;+;+;+;+;+;+	2808	4	2	1	2	3	1	0	0	2	1	0	1	0	1
ENSMUST00000006106	Trpv1	11;11;11;11;11;11;11;11;11;11;11;11;11;11	73238259;73239277;73239521;73240141;73240383;73244203;73245976;73248171;73250703;73251257;73253023;73254193;73254769;73260335	73238542;73239443;73239673;73240281;73240681;73244361;73246071;73248241;73250868;73251323;73253342;73254320;73254884;73260507	+;+;+;+;+;+;+;+;+;+;+;+;+;+	2340	0	0	0	0	0	0	0	0	0	0	0	0	0	0
ENSMUST00000006112	Ephb3	16;16;16;16;16;16;16;16;16;16;16;16;16;16;16;16	21204755;21212890;21214325;21217196;21218015;21218495;21218794;21219039;21219455;21220420;21220647;21221285;21221627;21221865;21222149;21222408	21205263;21212954;21214997;21217351;21218365;21218619;21218953;21219147;21219507;21220542;21220894;21221500;21221776;21222058;21222304;21223304	+;+;+;+;+;+;+;+;+;+;+;+;+;+;+;+	4185	0	4	6	0	1	3	0	2	0	0	0	0	0	1
ENSMUST00000006123	Tuft1	3;3;3;3;3;3;3;3;3;3;3;3;3	94612757;94614724;94615770;94616622;94622051;94622688;94628197;94632597;94634458;94635409;94638925;94639395;94658725	94614191;94614824;94615853;94616727;94622145;94622816;94628310;94632662;94634547;94635495;94639026;94639469;94658871	-;-;-;-;-;-;-;-;-;-;-;-;-	2631	0	0	0	0	0	0	0	0	0	0	0	0	0	0
ENSMUST00000006128	Rcn1	2;2;2;2;2;2	105386291;105388977;105391970;105393589;105394679;105398970	105388026;105389176;105392030;105393767;105394872;105399319	-;-;-;-;-;-	2720	2	9	9	13	4	2	0	5	42	63	22	20	42	61
ENSMUST00000006136	Dnase1	16;16;16;16;16;16;16;16;16	4036970;4037550;4037954;4038187;4038516;4038943;4039130;4039545;4039812	4037434;4037697;4038042;4038270;4038631;4039055;4039284;4039641;4040024	+;+;+;+;+;+;+;+;+	1480	0	0	0	0	0	0	0	0	0	0	0	0	0	0
ENSMUST00000006137	Trap1	16;16;16;16;16;16;16;16;16;16;16;16;16;16;16;16;16;16	4039971;4040359;4043953;4044613;4045443;4045880;4049351;4052865;4053481;4054754;4055797;4056330;4060757;4062330;4065233;4068256;4068857;4077693	4040224;4040431;4044098;4044698;4045581;4046065;4049498;4052934;4053601;4054909;4055870;4056439;4060917;4062401;4065373;4068338;4069021;4077827	-;-;-;-;-;-;-;-;-;-;-;-;-;-;-;-;-;-	2320	154	163	210	125	155	153	43	57	242	205	59	185	181	280
ENSMUST00000006138	NA	16;16;16;16;16;16;16	3884683;3894369;3897251;3899872;3900643;3901783;3903466	3884806;3894484;3897380;3899968;3900877;3902125;3904770	+;+;+;+;+;+;+	2350	0	0	0	0	0	0	0	0	0	0	0	0	0	0
ENSMUST00000006139	1700037C18Rik	16;16;16;16	3895181;3897229;3906841;3907615	3895414;3897345;3907194;3907757	-;-;-;-	848	0	0	0	0	1	1	0	0	2	3	0	1	2	1
ENSMUST00000006151	Tyrp1	4;4;4;4;4;4;4;4	80834230;80834989;80837381;80840600;80844791;80846571;80849730;80850679	80834416;80835458;80837703;80840804;80844958;80846750;80849876;80851718	+;+;+;+;+;+;+;+	2720	0	0	0	0	0	0	0	0	0	0	0	0	0	0
ENSMUST00000006167	Odr4	1;1;1;1;1;1;1;1;1;1;1;1;1	150362521;150363491;150372029;150374795;150375496;150381499;150382268;150383058;150384429;150386358;150388523;150390236;150392604	150362888;150363598;150372199;150374885;150375624;150381594;150382408;150383094;150384535;150386453;150388657;150390356;150392719	-;-;-;-;-;-;-;-;-;-;-;-;-	1716	0	0	0	0	0	0	0	0	0	0	0	0	0	0
ENSMUST00000006171	Prg4	1;1;1;1;1;1;1;1;1;1;1	150449412;150450763;150451249;150451854;150452223;150453463;150454052;150456251;150460652;150462097;150465498	150450081;150450888;150451449;150452010;150452359;150453540;150454120;150456337;150460771;150462219;150465598	-;-;-;-;-;-;-;-;-;-;-	1869	0	0	0	0	0	0	0	0	0	0	0	0	0	0
ENSMUST00000006178	Kptn	7;7;7;7;7;7;7;7;7;7;7;7	16119895;16120490;16120712;16120870;16123035;16123200;16123772;16123955;16124717;16125713;16125937;16127118	16120181;16120572;16120796;16120924;16123110;16123273;16123881;16124032;16124792;16125848;16126107;16127516	+;+;+;+;+;+;+;+;+;+;+;+	1630	12	15	25	13	13	24	7	3	153	140	84	120	149	148
ENSMUST00000006181	Napa	7;7;7;7;7;7;7;7;7;7;7	16098458;16107553;16109051;16112584;16113112;16113350;16113476;16114121;16115203;16115600;16116464	16098774;16107632;16109167;16112630;16113189;16113405;16113560;16114225;16115271;16115650;16117975	+;+;+;+;+;+;+;+;+;+;+	2517	1023	885	1083	872	1105	1104	555	518	1933	1776	557	1788	1785	1921
ENSMUST00000006205	Ankhd1	18;18;18;18;18;18;18;18;18;18;18;18;18;18;18;18;18;18;18;18;18;18;18;18;18;18;18;18;18;18;18;18;18;18	36560611;36575019;36578618;36581068;36583612;36589348;36591447;36594085;36594802;36600766;36611800;36613093;36613833;36614715;36624509;36632067;36632350;36632708;36634227;36634592;36638205;36638546;36640265;36641577;36642926;36644261;36645105;36646691;36647131;36654093;36655474;36656686;36657974;36658400	36561055;36575169;36578774;36581215;36583759;36589581;36591541;36594322;36594993;36600875;36611887;36613220;36613976;36614817;36625267;36632212;36632461;36632853;36634369;36634805;36638380;36638708;36640360;36641693;36643094;36644714;36645239;36646840;36648740;36654266;36655677;36656862;36658138;36658908	+;+;+;+;+;+;+;+;+;+;+;+;+;+;+;+;+;+;+;+;+;+;+;+;+;+;+;+;+;+;+;+;+;+	8200	0	0	0	0	0	0	0	0	0	0	0	0	0	0
ENSMUST00000006209	Sra1	18;18;18;18;18	36667429;36667791;36668652;36670004;36670248	36667659;36667893;36668848;36670129;36670285	-;-;-;-;-	695	0	0	0	0	0	0	0	0	0	0	0	0	0	0
ENSMUST00000006217	Snf8	11;11;11;11;11;11;11;11	96034885;96035319;96039279;96041625;96043404;96045161;96046280;96047195	96035067;96035369;96039417;96041729;96043476;96045302;96046354;96047430	+;+;+;+;+;+;+;+	1004	0	0	0	0	0	0	0	0	0	1	1	0	1	1
ENSMUST00000006221	Vps54	11;11;11;11;11;11;11;11;11;11;11;11;11;11;11;11;11;11;11;11;11;11;11	21239281;21263199;21264630;21268785;21271704;21274998;21277675;21291033;21292024;21295341;21298754;21299978;21305651;21306366;21306909;21308739;21311077;21312240;21312851;21313084;21314919;21316792;21319753	21239371;21263354;21264871;21268863;21271738;21275129;21278060;21291159;21292131;21295396;21298850;21300318;21305780;21306547;21307021;21308802;21311182;21312327;21312972;21313164;21315026;21316886;21321136	+;+;+;+;+;+;+;+;+;+;+;+;+;+;+;+;+;+;+;+;+;+;+	4323	0	0	0	0	1	0	0	0	0	0	0	0	0	1
ENSMUST00000006235	Ctsb	14;14;14;14;14;14;14;14;14;14	63122462;63133316;63133965;63135608;63136407;63138033;63138351;63138999;63141734;63142232	63122565;63133466;63134050;63135722;63136525;63138118;63138494;63139115;63141862;63145919	+;+;+;+;+;+;+;+;+;+	4739	3284	2981	3432	2755	3223	3163	1984	1823	4613	4135	1009	3857	3657	4936
ENSMUST00000006254	Tbcb	7;7;7;7;7;7	30224131;30224473;30226844;30227604;30231126;30231580	30224347;30224545;30227035;30227700;30231269;30232272	-;-;-;-;-;-	1416	303	290	349	237	314	329	162	209	628	599	50	559	602	627
ENSMUST00000006286	Inpp5k	11;11;11;11;11;11;11;11;11;11;11;11	75630988;75633069;75633463;75636944;75637410;75638145;75639456;75645428;75646786;75647193;75647402;75647652	75631197;75633176;75633571;75637060;75637585;75638256;75639565;75645617;75646923;75647276;75647506;75648871	+;+;+;+;+;+;+;+;+;+;+;+	2679	1	0	1	0	2	1	0	0	1	0	0	3	1	2
ENSMUST00000006293	Crkl	16;16;16	17451987;17468893;17483661	17452788;17469358;17486255	+;+;+	3863	577	449	615	438	485	438	168	170	780	726	16	525	451	1055
ENSMUST00000006301	Lrwd1	5;5;5;5;5;5;5;5;5;5;5;5;5;5;5	136122772;136123403;136123600;136123867;136130221;136130463;136130974;136131453;136132112;136132306;136132975;136133305;136133934;136134499;136135872	136123315;136123512;136123755;136123958;136130361;136130535;136131181;136131562;136132226;136132428;136133079;136133445;136134050;136134733;136136074	-;-;-;-;-;-;-;-;-;-;-;-;-;-;-	2473	2	1	1	0	1	2	2	1	2	3	0	1	0	1
ENSMUST00000006303	Upk3bl	5;5;5;5;5;5	136057267;136059731;136060062;136061183;136061507;136064072	136057485;136059883;136060281;136061259;136061627;136064326	+;+;+;+;+;+	1045	0	0	0	0	0	0	0	0	0	0	0	0	0	0
ENSMUST00000006311	Tead4	6;6;6;6;6;6;6;6;6;6;6;6	128227143;128228568;128230592;128242401;128243370;128246321;128246818;128247960;128251540;128251922;128270868;128300295	128228479;128228720;128230732;128242574;128243509;128246376;128246861;128248088;128251602;128251986;128271122;128300813	-;-;-;-;-;-;-;-;-;-;-;-	3076	1	0	4	2	2	0	0	0	10	12	10	8	13	10
ENSMUST00000006341	Prss16	13;13;13;13;13;13;13;13;13;13;13;13	22002176;22002926;22003146;22005091;22005982;22006747;22006888;22007143;22008330;22008579;22009390;22009631	22002810;22003071;22003325;22005232;22006272;22006794;22006965;22007266;22008459;22008678;22009556;22009741	-;-;-;-;-;-;-;-;-;-;-;-	2152	0	1	3	0	1	0	0	0	5	3	7	4	8	4
ENSMUST00000006353	Cdkal1	13;13;13;13;13;13;13;13;13;13;13;13;13;13;13;13	29325301;29354630;29357500;29444008;29474529;29517413;29552229;29625621;29691599;29709095;29717721;29777217;29846228;29849939;29854898;29855563	29326228;29354794;29357583;29444070;29474709;29517558;29552395;29625724;29691719;29709143;29717817;29777301;29846340;29850108;29854941;29855674	-;-;-;-;-;-;-;-;-;-;-;-;-;-;-;-	2629	59	49	61	41	52	56	30	20	223	213	8	164	166	243
ENSMUST00000006362	Rhox6	X;X;X;X	37826910;37827366;37828415;37829624	37827179;37827825;37828460;37829857	+;+;+;+	1010	0	0	0	0	0	0	0	0	0	0	0	0	0	0
ENSMUST00000006367	Htra1	7;7;7;7;7;7;7;7;7	130936203;130961513;130961973;130979301;130979952;130981657;130982237;130983660;130984963	130936743;130961612;130962177;130979495;130979984;130981771;130982294;130983755;130985660	+;+;+;+;+;+;+;+;+	2041	0	0	0	0	0	0	0	0	0	0	0	0	0	0
ENSMUST00000006377	Zbtb17	4;4;4;4;4;4;4;4;4;4;4;4;4;4;4;4	141444654;141447251;141461769;141462535;141463267;141463673;141464237;141464560;141464789;141465349;141465524;141465722;141465977;141466348;141466674;141466843	141444802;141447337;141461975;141462723;141463407;141463795;141464478;141464702;141465089;141465436;141465640;141465842;141466107;141466557;141466763;141467225	+;+;+;+;+;+;+;+;+;+;+;+;+;+;+;+	2722	0	0	0	0	0	0	0	0	0	0	0	1	0	0
ENSMUST00000006378	Clcnkb	4;4;4;4;4;4;4;4;4;4;4;4;4;4;4;4;4;4;4;4	141404353;141404753;141405052;141405272;141407089;141407804;141408306;141408576;141409326;141409742;141410516;141410694;141411383;141411590;141411743;141412192;141413885;141414445;141415196;141415948	141404632;141404839;141405135;141405360;141407222;141408017;141408416;141408645;141409499;141409826;141410617;141410778;141411508;141411668;141411820;141412331;141414013;141414573;141415302;141416014	-;-;-;-;-;-;-;-;-;-;-;-;-;-;-;-;-;-;-;-	2370	0	0	0	0	0	0	0	0	0	0	0	0	0	0
ENSMUST00000006380	Fam131c	4;4;4;4;4;4;4	141368220;141379678;141380319;141380602;141382327;141382744;141383388	141368324;141379793;141380354;141380695;141382509;141382854;141384175	+;+;+;+;+;+;+	1433	2003	1759	2102	1730	1899	1911	1220	1202	1620	1367	239	1053	1078	1653
ENSMUST00000006381	Fblim1	4;4;4;4;4;4;4;4;4	141576062;141580983;141583054;141584696;141589298;141589944;141595224;141595895;141598083	141577943;141581100;141583232;141584865;141589415;141590125;141595479;141595948;141598224	-;-;-;-;-;-;-;-;-	3101	0	0	0	0	0	0	0	0	0	0	0	0	0	0
ENSMUST00000006391	Serpinb9	13;13;13;13;13;13;13	33004541;33006533;33008006;33008768;33010687;33013862;33015447	33004695;33006710;33008143;33008885;33010829;33014017;33017955	+;+;+;+;+;+;+	3397	0	0	0	0	0	0	0	0	0	0	0	0	0	0
ENSMUST00000006392	Serpinb9b	13;13;13;13;13;13;13	33027416;33029452;33032916;33033527;33035516;33037972;33039550	33027600;33029629;33033053;33033644;33035658;33038127;33041884	+;+;+;+;+;+;+	3253	0	0	0	0	1	0	0	0	0	0	1	0	1	0
ENSMUST00000006397	Epor	9;9;9;9;9;9;9;9	21958899;21959761;21960524;21960690;21961448;21961691;21962204;21963317	21959670;21959848;21960611;21960843;21961605;21961866;21962336;21963576	-;-;-;-;-;-;-;-	1829	11	6	20	8	3	2	4	5	41	36	25	44	30	41
ENSMUST00000006403	Ccdc159	9;9;9;9;9;9;9;9;9;9;9;9;9	21927471;21929093;21929308;21931310;21931699;21931865;21932804;21933546;21933696;21934118;21934435;21935530;21935796	21927728;21929226;21929534;21931343;21931787;21931946;21932990;21933613;21933772;21934233;21934517;21935628;21935872	+;+;+;+;+;+;+;+;+;+;+;+;+	1531	0	0	0	0	0	0	0	0	0	0	0	0	0	0
ENSMUST00000006415	Plcb2	2;2;2;2;2;2;2;2;2;2;2;2;2;2;2;2;2;2	118714233;118715363;118715598;118717027;118717212;118717395;118718190;118718510;118718794;118719114;118719355;118719660;118723128;118723305;118723456;118723668;118725017;118728238	118714778;118715487;118715682;118717123;118717327;118717557;118718274;118718592;118718951;118719260;118719521;118719760;118723203;118723358;118723535;118723808;118725094;118728391	-;-;-;-;-;-;-;-;-;-;-;-;-;-;-;-;-;-	2456	0	0	1	0	0	0	0	0	1	1	4	0	0	0
ENSMUST00000006424	Mob1b	5;5;5;5;5;5	88720871;88743304;88745057;88749525;88753160;88756095	88721121;88743470;88745150;88749658;88753323;88757989	+;+;+;+;+;+	2705	0	0	0	0	0	0	0	0	0	0	0	0	0	0
ENSMUST00000006431	Atp6v1b1	6;6;6;6;6;6;6;6;6;6;6;6;6;6	83743017;83749854;83752107;83752383;83752850;83753767;83754725;83755387;83756188;83756553;83756849;83757851;83758115;83758330	83743202;83749909;83752205;83752476;83752927;83753906;83754826;83755484;83756311;83756703;83756931;83757955;83758244;83758809	+;+;+;+;+;+;+;+;+;+;+;+;+;+	1926	89	193	358	232	112	72	30	49	492	583	343	560	638	708
ENSMUST00000006435	Atp6v1b2	8;8;8;8;8;8;8;8;8;8;8;8;8;8	69088646;69096220;69101365;69101936;69102164;69102451;69102762;69103380;69103645;69105809;69107582;69108283;69109880;69112430	69088928;69096275;69101463;69102029;69102241;69102590;69102863;69103477;69103768;69105959;69107664;69108387;69110009;69113711	+;+;+;+;+;+;+;+;+;+;+;+;+;+	2825	861	763	961	701	840	834	393	385	2386	2399	1398	2314	2386	2408
ENSMUST00000006444	Tep1	14;14;14;14;14;14;14;14;14;14;14;14;14;14;14;14;14;14;14;14;14;14;14;14;14;14;14;14;14;14;14;14;14;14;14;14;14;14;14;14;14;14;14;14;14;14;14;14;14;14;14;14;14;14;14	50824062;50824505;50824732;50825056;50826813;50827056;50828905;50829168;50829663;50829872;50830130;50831732;50833454;50833914;50835992;50836310;50836685;50837038;50837380;50837584;50838524;50838946;50840582;50840969;50841210;50841557;50841865;50843177;50843706;50844023;50844255;50844534;50844852;50845060;50845416;50846475;50846833;50847614;50850034;50850587;50851922;50852977;50853550;50854128;508…	50824290;50824609;50824949;50825161;50826909;50827199;50829029;50829304;50829792;50829948;50830262;50831839;50833567;50834077;50836204;50836463;50836897;50837193;50837479;50837708;50838641;50839186;50840696;50841057;50841343;50841707;50841997;50843269;50843885;50844179;50844430;50844728;50844969;50845173;50845540;50846595;50847009;50847772;50850093;50850717;50851999;50853135;50853718;50854314;508…	-;-;-;-;-;-;-;-;-;-;-;-;-;-;-;-;-;-;-;-;-;-;-;-;-;-;-;-;-;-;-;-;-;-;-;-;-;-;-;-;-;-;-;-;-;-;-;-;-;-;-;-;-;-;-	8168	342	333	384	212	332	324	164	112	892	849	527	779	734	927
ENSMUST00000006451	Ttc5	14;14;14;14;14;14;14;14;14;14	50765415;50767143;50772116;50772474;50773277;50775291;50777262;50777757;50781475;50785438	50766022;50767287;50772330;50772620;50773333;50775382;50777412;50777968;50781607;50785518	-;-;-;-;-;-;-;-;-;-	1841	1149	982	1239	825	1165	1101	566	712	2097	1937	419	1827	1743	2096
ENSMUST00000006452	Osgep	14;14;14;14;14;14;14;14;14;14;14	50915682;50916152;50916342;50916614;50916800;50917232;50917383;50917836;50919616;50919930;50924664	50915898;50916250;50916417;50916704;50916865;50917310;50917503;50917931;50919791;50920049;50924830	-;-;-;-;-;-;-;-;-;-;-	1308	0	0	0	0	0	0	0	0	0	0	0	0	0	0
ENSMUST00000006462	Aamp	1;1;1;1;1;1;1;1;1;1;1	74279840;74280783;74281089;74281329;74281527;74281736;74282027;74282411;74283094;74283886;74284503	74280309;74280937;74281179;74281432;74281642;74281819;74282171;74282550;74283213;74284041;74284738	-;-;-;-;-;-;-;-;-;-;-	1817	0	0	1	0	0	0	0	0	0	0	0	1	0	0
ENSMUST00000006467	Arpc2	1;1;1;1;1;1;1;1;1;1	74236517;74246080;74248132;74251254;74254828;74255958;74262459;74263743;74264353;74267771	74236899;74246114;74248244;74251299;74255014;74256051;74262585;74263843;74264453;74267987	+;+;+;+;+;+;+;+;+;+	1404	37	25	47	21	33	35	11	23	55	33	2	37	15	90
ENSMUST00000006470	Kmt2b	7;7;7;7;7;7;7;7;7;7;7;7;7;7;7;7;7;7;7;7;7;7;7;7;7;7;7;7;7;7;7;7;7;7;7;7;7	30568858;30569516;30569758;30569938;30570291;30570554;30570701;30573960;30574148;30574325;30575853;30576618;30576874;30577031;30577297;30578483;30578703;30578880;30579507;30579721;30579926;30580090;30580439;30581015;30581650;30581838;30582168;30582408;30582788;30583184;30583700;30583917;30584449;30584693;30584994;30587255;30588355	30569436;30569645;30569841;30570045;30570468;30570628;30570838;30574066;30574237;30575624;30576077;30576778;30576952;30577151;30577455;30578620;30578794;30578995;30579580;30579825;30580015;30580274;30580552;30581132;30581745;30581984;30582281;30582506;30582882;30583462;30583755;30584196;30584599;30584806;30587029;30587327;30588717	-;-;-;-;-;-;-;-;-;-;-;-;-;-;-;-;-;-;-;-;-;-;-;-;-;-;-;-;-;-;-;-;-;-;-;-;-	8469	0	0	0	0	0	0	0	0	0	0	0	0	0	0
ENSMUST00000006476	Upk1a	7;7;7;7;7;7;7;7	30603092;30603772;30605061;30606875;30607131;30609614;30612387;30612714	30603642;30603855;30605240;30606982;30607205;30609814;30612474;30612734	-;-;-;-;-;-;-;-	1308	6	6	16	7	3	3	4	0	13	9	11	10	12	21
ENSMUST00000006478	Tmem147	7;7;7;7;7;7;7	30727701;30727987;30728205;30728432;30728657;30729202;30729344	30727903;30728108;30728289;30728568;30728716;30729271;30729534	-;-;-;-;-;-;-	868	288	321	421	273	304	357	165	124	805	780	407	753	794	819
ENSMUST00000006496	Rps9	7;7;7;7;7	3703993;3704327;3704646;3705733;3706651	3704064;3704448;3704768;3705919;3706901	+;+;+;+;+	755	0	0	0	2	1	0	0	0	0	1	0	2	2	3
ENSMUST00000006508	Ggt1	10;10;10;10;10;10;10;10;10;10;10;10;10	75573448;75574232;75575950;75576216;75578729;75579226;75580504;75581297;75584820;75585158;75585387;75585591;75585881	75573748;75574396;75576080;75576302;75578921;75579383;75580653;75581433;75585007;75585285;75585499;75585704;75586182	+;+;+;+;+;+;+;+;+;+;+;+;+	2167	0	0	0	0	0	0	0	0	0	0	0	0	0	0
ENSMUST00000006523	Crip1	12;12;12;12;12	113152012;113153281;113153455;113153618;113153775	113152153;113153375;113153512;113153664;113153877	+;+;+;+;+	445	34	116	239	64	35	59	19	31	222	258	300	194	252	202
ENSMUST00000006525	Cbfa2t3	8;8;8;8;8;8;8;8;8;8;8	122629463;122633318;122634360;122634949;122635754;122637994;122638857;122642964;122643292;122650330;122677862	122630976;122633508;122634428;122635147;122635839;122638223;122639038;122643053;122643533;122650476;122678072	-;-;-;-;-;-;-;-;-;-;-	3161	0	0	0	0	0	0	0	0	0	0	0	0	0	0
ENSMUST00000006544	Gcat	15;15;15;15;15;15;15;15;15	79030874;79033931;79034960;79035257;79035777;79036020;79036267;79036753;79037143	79031120;79034061;79035061;79035403;79035931;79036102;79036438;79036874;79038348	+;+;+;+;+;+;+;+;+	2365	15	35	38	8	27	20	6	12	163	143	228	178	169	138
ENSMUST00000006556	Mpl	4;4;4;4;4;4;4;4;4;4;4;4	118443272;118444017;118446052;118446355;118448546;118448881;118454459;118455118;118455645;118456676;118457108;118457393	118443680;118444104;118446148;118446514;118448688;118449062;118454585;118455280;118455943;118456854;118457240;118457457	-;-;-;-;-;-;-;-;-;-;-;-	2045	0	0	0	0	0	0	0	0	0	0	0	0	0	0
ENSMUST00000006557	Elovl1	4;4;4;4;4;4;4;4	118428093;118430496;118430715;118431063;118431266;118431409;118431597;118431898	118428215;118430555;118430905;118431143;118431322;118431514;118431733;118432953	+;+;+;+;+;+;+;+	1811	0	0	0	0	0	0	0	0	3	0	0	0	0	0
ENSMUST00000006559	Tpbg	9;9	85842380;85843651	85842592;85847040	+;+	3603	0	0	0	0	0	0	0	0	1	0	0	0	0	0
ENSMUST00000006562	Hyi	4;4;4;4;4;4;4;4;4	118360014;118360306;118360340;118361616;118361874;118362041;118362191;118362363;118362584	118360231;118360337;118360389;118361730;118361952;118362090;118362260;118362497;118362744	+;+;+;+;+;+;+;+;+	910	0	0	0	0	0	0	0	0	3	1	0	1	0	0
ENSMUST00000006565	Cdc20	4;4;4;4;4;4;4;4;4;4	118432901;118433481;118434751;118435473;118435777;118435969;118436260;118436510;118436694;118436941	118433141;118433598;118434876;118435701;118435871;118436165;118436388;118436606;118436842;118437352	-;-;-;-;-;-;-;-;-;-	1793	1	32	55	2	4	11	0	15	16	12	48	21	12	19
ENSMUST00000006570	NA	1;1;1;1;1;1;1;1;1	171250423;171252537;171253087;171253893;171256148;171256528;171256955;171257719;171258752	171251469;171252860;171253219;171254063;171256434;171256714;171257130;171257894;171260636	+;+;+;+;+;+;+;+;+	4386	0	0	0	0	0	0	0	0	0	0	0	0	0	0
ENSMUST00000006578	Nectin4	1;1;1;1;1;1;1;1;1	171370352;171380118;171382378;171383637;171384684;171385098;171385663;171386160;171386581	171370743;171380477;171382668;171383757;171384832;171385251;171385738;171386234;171388598	+;+;+;+;+;+;+;+;+	3636	0	0	0	0	0	0	0	0	1	0	1	0	1	1
ENSMUST00000006579	Pfdn2	1;1;1;1	171345730;171356530;171356705;171357788	171345786;171356618;171356828;171358402	+;+;+;+	885	1	0	2	0	0	0	1	1	5	6	6	6	6	8
ENSMUST00000006587	Tmem189	2;2;2;2;2;2	167642608;167644764;167646032;167646968;167654608;167661373	167644182;167644976;167646176;167647059;167654727;167661556	-;-;-;-;-;-	2329	70	51	83	48	56	41	15	24	382	416	220	385	430	430
ENSMUST00000006611	Srm	4;4;4;4;4;4;4	148591503;148592044;148592482;148593288;148593768;148594083;148594287	148591786;148592164;148592574;148593441;148593997;148594205;148594619	+;+;+;+;+;+;+	1338	23	34	42	25	26	16	9	8	108	124	57	92	112	144
ENSMUST00000006614	Epha2	4;4;4;4;4;4;4;4;4;4;4;4;4;4;4;4;4	141301240;141306514;141308405;141316587;141316871;141318482;141318923;141320494;141321217;141321465;141321702;141322063;141322203;141322586;141323413;141324232;141328413	141301434;141306581;141309080;141316742;141317203;141318597;141319076;141320593;141321272;141321590;141321890;141322124;141322412;141322735;141323606;141324387;141329384	+;+;+;+;+;+;+;+;+;+;+;+;+;+;+;+;+	3913	5	20	21	7	6	6	7	4	58	117	245	134	110	98
ENSMUST00000006618	Arhgef19	4;4;4;4;4;4;4;4;4;4;4;4;4;4;4;4;4	141242869;141244818;141246175;141246949;141247378;141247554;141247847;141248987;141249227;141249566;141250563;141250728;141250944;141254290;141254701;141256304;141256722	141243010;141244966;141246609;141247230;141247486;141247630;141248109;141249147;141249379;141249695;141250637;141250817;141251104;141254448;141254780;141256408;141257564	+;+;+;+;+;+;+;+;+;+;+;+;+;+;+;+;+	3414	615	537	597	458	522	616	218	190	902	787	273	708	858	827
ENSMUST00000006625	Rbm14	19;19;19	4800569;4802551;4811172	4801805;4804015;4811634	-;-;-	3165	24	12	17	16	19	15	5	4	54	45	18	37	46	61
ENSMUST00000006626	Actn3	19;19;19;19;19;19;19;19;19;19;19;19;19;19;19;19;19;19;19;19;19	4861223;4861585;4862170;4862324;4863135;4863410;4863971;4864425;4864653;4865299;4867541;4867813;4868718;4869358;4870912;4871082;4871597;4871771;4872239;4872542;4877711	4861503;4861743;4862235;4862470;4863314;4863544;4864153;4864565;4864761;4865449;4867688;4868043;4868810;4869443;4870993;4871160;4871684;4871857;4872358;4872656;4877909	-;-;-;-;-;-;-;-;-;-;-;-;-;-;-;-;-;-;-;-;-	2880	5	4	7	3	2	4	1	1	3	5	1	5	0	0
ENSMUST00000006629	Sptbn1	11;11;11;11;11;11;11;11;11;11;11;11;11;11;11;11;11;11;11;11;11;11;11;11;11;11;11;11;11;11;11;11;11;11;11;11	30099395;30101613;30103248;30104436;30109089;30109871;30110726;30112827;30113856;30114676;30117636;30118291;30119377;30120530;30120976;30121476;30123799;30124866;30129570;30135940;30136874;30138364;30138592;30140471;30142120;30143019;30144106;30145829;30146739;30149500;30149930;30151556;30154229;30159294;30219579;30267948	30100714;30101655;30103421;30104674;30109152;30109980;30110922;30112911;30113994;30114920;30118010;30118495;30119507;30120811;30121065;30121700;30124062;30125012;30129660;30136142;30137630;30138501;30139462;30140624;30142422;30143177;30144223;30146016;30146851;30149615;30150010;30151647;30154402;30159445;30219772;30268169	-;-;-;-;-;-;-;-;-;-;-;-;-;-;-;-;-;-;-;-;-;-;-;-;-;-;-;-;-;-;-;-;-;-;-;-	8461	0	0	0	0	0	0	0	0	0	0	0	0	0	0
ENSMUST00000006632	Zdhhc24	19;19;19	4878672;4880121;4883476	4879029;4880398;4885397	+;+;+	2558	0	0	0	0	0	0	0	0	0	1	0	0	1	0
ENSMUST00000006638	Slc34a3	2;2;2;2;2;2;2;2;2;2;2;2;2	25228898;25230573;25230773;25230976;25231223;25231421;25231668;25231951;25232147;25232380;25232968;25233303;25234180	25229515;25230697;25230889;25231143;25231310;25231510;25231863;25232062;25232290;25232508;25233054;25233426;25234364	-;-;-;-;-;-;-;-;-;-;-;-;-	2183	0	0	0	0	2	0	0	0	0	0	0	0	0	0
ENSMUST00000006646	Nsmf	2;2;2;2;2;2;2;2;2;2;2;2;2;2;2	25054384;25054998;25055636;25057101;25058253;25059021;25059605;25060139;25060479;25060692;25060814;25061059;25061262;25061493;25061672	25054671;25055059;25056136;25057176;25058321;25059073;25059694;25060263;25060562;25060725;25060884;25061138;25061364;25061568;25062881	+;+;+;+;+;+;+;+;+;+;+;+;+;+;+	2922	0	0	0	0	0	0	0	0	0	0	0	0	0	0
ENSMUST00000006659	Prl7a1	13;13;13;13;13;13;13	27633380;27635691;27637553;27639081;27639851;27640641;27642420	27633700;27635870;27637663;27639119;27639889;27640816;27642474	-;-;-;-;-;-;-	921	0	0	0	0	0	0	0	0	0	0	0	0	0	0
ENSMUST00000006660	Prl7a2	13;13;13;13;13;13	27658956;27660865;27662672;27665056;27665878;27667964	27659281;27661044;27662779;27665094;27666056;27668036	-;-;-;-;-;-	905	0	0	0	0	0	0	0	0	0	0	0	0	0	0
ENSMUST00000006662	Prl8a9	13;13;13;13;13;13	27558009;27559284;27560500;27561557;27562414;27564516	27558339;27559463;27560607;27561595;27562592;27564604	-;-;-;-;-;-	926	0	0	0	0	0	0	0	0	0	0	0	0	0	0
ENSMUST00000006664	Prl8a1	13;13;13;13;13;13	27573922;27575519;27576894;27578623;27579636;27582080	27574190;27575698;27577001;27578661;27579811;27582171	-;-;-;-;-;-	864	0	0	0	0	0	0	0	0	0	0	0	0	0	0
ENSMUST00000006667	Gvin1	7;7	106156556;106215225	106165264;106215310	-;-	8795	0	0	0	0	0	0	0	0	0	0	0	0	0	0
ENSMUST00000006669	Pdk1	2;2;2;2;2;2;2;2;2;2;2	71873224;71875406;71880039;71883423;71883843;71885982;71887382;71888896;71895689;71897647;71899984	71873565;71875547;71880110;71883607;71883932;71886059;71887458;71888994;71895799;71897760;71903858	+;+;+;+;+;+;+;+;+;+;+	5185	44	40	53	25	38	39	32	22	611	602	179	496	468	439
ENSMUST00000006679	Prtn3	10;10;10;10;10	79879614;79880428;79881036;79881935;79882818	79879742;79880593;79881177;79882165;79883174	+;+;+;+;+	1025	1	6	70	5	2	7	2	0	15	8	0	4	9	9
ENSMUST00000006687	Orm3	4;4;4;4;4;4	63356162;63356571;63356911;63357544;63357789;63359317	63356313;63356713;63356981;63357651;63357892;63359511	+;+;+;+;+;+	773	2	2	1	3	6	5	0	3	10	5	0	2	1	3
ENSMUST00000006692	Mvd	8;8;8;8;8;8;8;8;8;8	122433596;122434804;122436474;122437010;122437415;122437827;122439377;122439638;122440182;122443294	122434175;122434912;122436589;122437228;122437489;122438026;122439523;122439752;122440252;122443422	-;-;-;-;-;-;-;-;-;-	1761	61	83	146	46	53	58	21	33	280	220	224	194	247	270
ENSMUST00000006697	Itih3	14;14;14;14;14;14;14;14;14;14;14;14;14;14;14;14;14;14;14;14;14;14	30908573;30909398;30909701;30911925;30912616;30912876;30913161;30914049;30914653;30915341;30915632;30917232;30917662;30918275;30918948;30919291;30920663;30921280;30921662;30921870;30922820;30923457	30908812;30909509;30909873;30912129;30912729;30912911;30913193;30914051;30914807;30915480;30915817;30917413;30917787;30918443;30919064;30919416;30920776;30921442;30921766;30922036;30922840;30923760	-;-;-;-;-;-;-;-;-;-;-;-;-;-;-;-;-;-;-;-;-;-	2991	0	0	0	0	0	0	0	0	0	0	0	0	0	0
ENSMUST00000006701	Stimate	14;14;14;14;14;14;14;14	30825590;30862880;30864429;30866623;30870751;30871481;30872550;30874378	30825890;30862928;30864524;30866744;30870863;30871558;30872699;30876986	+;+;+;+;+;+;+;+	3518	167	146	198	139	167	175	44	61	722	549	229	538	514	732
ENSMUST00000006703	Itih4	14;14;14;14;14;14;14;14;14;14;14;14;14;14;14;14;14;14;14;14;14;14;14	30886476;30887805;30889573;30889797;30890099;30890649;30891381;30891704;30891953;30892266;30892536;30895028;30895404;30895811;30896103;30896558;30897523;30897857;30897980;30899320;30900885;30901135;30901635	30886618;30887965;30889677;30889959;30890209;30890777;30891497;30891872;30892078;30892447;30892721;30895167;30895558;30895840;30896162;30896770;30897573;30897889;30898096;30899488;30901039;30901231;30901981	+;+;+;+;+;+;+;+;+;+;+;+;+;+;+;+;+;+;+;+;+;+;+	3159	0	0	0	0	0	0	0	0	0	0	0	0	0	0
ENSMUST00000006704	Itih1	14;14;14;14;14;14;14;14;14;14;14;14;14;14;14;14;14;14;14;14;14;14	30929180;30929790;30930241;30931161;30932200;30932402;30932865;30933261;30933358;30934107;30935281;30935715;30936703;30936956;30937757;30937959;30940872;30941482;30941924;30942460;30942894;30943159	30929639;30929901;30930413;30931362;30932313;30932479;30932885;30933275;30933512;30934246;30935466;30935896;30936828;30937124;30937873;30938084;30940985;30941644;30942028;30942638;30942914;30943277	-;-;-;-;-;-;-;-;-;-;-;-;-;-;-;-;-;-;-;-;-;-	3077	0	0	0	0	0	0	0	0	0	0	0	0	0	0
ENSMUST00000006716	Wnt6	1;1;1;1	74771892;74782102;74782560;74784139	74772222;74782322;74782894;74785322	+;+;+;+	2071	1	3	5	0	3	2	0	0	21	22	48	20	17	11
ENSMUST00000006718	Wnt10a	1;1;1;1	74791516;74793363;74800533;74803123	74792283;74793625;74800912;74804179	+;+;+;+	2468	0	4	2	0	1	3	2	0	1	4	0	1	6	4
ENSMUST00000006721	Cryba2	1;1;1;1;1	74889934;74890531;74891946;74892727;74893077	74890136;74890673;74892087;74892891;74893143	-;-;-;-;-	720	0	0	1	2	0	0	0	1	0	0	0	0	1	1
ENSMUST00000006742	Atp7b	8;8;8;8;8;8;8;8;8;8;8;8;8;8;8;8;8;8;8;8;8	21992785;21995554;21997286;21997483;21998225;22000049;22002708;22004193;22006260;22011015;22011505;22011765;22012711;22013376;22014513;22015878;22018049;22020761;22022297;22027530;22059972	21994924;21995656;21997403;21997686;21998367;22000192;22002861;22004375;22006454;22011149;22011659;22011892;22012802;22013609;22014687;22015954;22018210;22020924;22022554;22028736;22060305	-;-;-;-;-;-;-;-;-;-;-;-;-;-;-;-;-;-;-;-;-	6505	32	213	196	92	62	29	25	11	209	319	288	298	281	409
ENSMUST00000006745	Defb2	8;8	21839926;21843272	21840019;21843482	+;+	305	0	0	0	0	0	0	0	0	0	0	0	0	0	0
ENSMUST00000006749	Slc4a1	11;11;11;11;11;11;11;11;11;11;11;11;11;11;11;11;11;11;11;11	102348824;102351102;102351357;102352439;102353191;102353824;102354266;102356077;102356380;102356717;102357041;102357923;102358218;102358404;102359010;102359225;102360147;102361141;102361381;102365057	102350367;102351275;102351526;102352692;102353357;102353913;102354436;102356271;102356528;102356929;102357251;102358104;102358299;102358527;102359145;102359405;102360220;102361261;102361463;102365280	-;-;-;-;-;-;-;-;-;-;-;-;-;-;-;-;-;-;-;-	4545	33	5	124	12	36	34	12	12	151	162	131	171	128	102
ENSMUST00000006750	Rundc3a	11;11;11;11;11;11;11;11;11;11;11	102393403;102397571;102398085;102398377;102399195;102399383;102399615;102399888;102400661;102400894;102401981	102393782;102397686;102398233;102398462;102399284;102399463;102399780;102400045;102400798;102401000;102402555	+;+;+;+;+;+;+;+;+;+;+	2046	0	0	0	0	0	0	0	0	0	0	0	0	0	0
ENSMUST00000006754	Ubtf	11;11;11;11;11;11;11;11;11;11;11;11;11;11;11;11;11;11;11;11	102305924;102306856;102307083;102307244;102307949;102308229;102308699;102308894;102309397;102309654;102309868;102310191;102310443;102311380;102311754;102313898;102314139;102314864;102316349;102318848	102306766;102306999;102307150;102307291;102308138;102308317;102308809;102309049;102309552;102309767;102309909;102310332;102310576;102311500;102311818;102314053;102314222;102315039;102316473;102319096	-;-;-;-;-;-;-;-;-;-;-;-;-;-;-;-;-;-;-;-	3213	0	0	0	0	0	0	0	0	0	0	0	0	0	0
ENSMUST00000006760	Cdt1	8;8;8;8;8;8;8;8;8;8	122568015;122569087;122569324;122569904;122570194;122570441;122571241;122571696;122571937;122572494	122568271;122569245;122569475;122570101;122570339;122570538;122571429;122571848;122572138;122573128	+;+;+;+;+;+;+;+;+;+	2189	13	32	100	23	40	22	8	15	83	74	57	79	84	101
ENSMUST00000006761	Runx1t1	4;4;4;4;4;4;4;4;4;4;4	13743436;13835633;13837760;13841798;13846776;13859811;13865201;13865831;13875477;13881050;13889612	13743729;13835770;13838001;13841887;13846957;13860061;13865286;13866032;13875545;13881240;13893649	+;+;+;+;+;+;+;+;+;+;+	5783	0	0	0	0	0	1	0	1	0	2	0	1	0	0
ENSMUST00000006762	Snai3	8;8;8	122454206;122456123;122460539	122455034;122456728;122460692	-;-;-	1589	0	2	3	0	2	1	2	5	5	3	7	1	5	7
ENSMUST00000006764	Aprt	8;8;8;8;8	122574637;122575137;122575402;122576515;122576753	122575027;122575215;122575535;122576621;122576907	-;-;-;-;-	866	161	210	322	121	171	181	67	107	617	560	416	582	633	594
ENSMUST00000006774	Gtf2h1	7;7;7;7;7;7;7;7;7;7;7;7;7;7;7	46796103;46801672;46803817;46804961;46806736;46808537;46808800;46812432;46812662;46814116;46815300;46816384;46816897;46819122;46822823	46796288;46801840;46804009;46805123;46806829;46808686;46808879;46812559;46812749;46814204;46815417;46816474;46817012;46819214;46823800	+;+;+;+;+;+;+;+;+;+;+;+;+;+;+	2736	51	41	69	34	39	41	21	16	372	424	604	343	390	343
ENSMUST00000006785	Slc17a1	13;13;13;13;13;13;13;13;13;13;13;13;13	23870296;23872559;23874593;23875489;23875803;23876540;23878462;23878682;23880354;23880579;23887973;23892535;23895294	23870443;23872627;23874765;23875722;23875890;23876626;23878580;23878843;23880486;23880726;23888063;23892671;23895730	+;+;+;+;+;+;+;+;+;+;+;+;+	2026	0	0	0	0	0	0	0	0	0	0	0	0	0	0
ENSMUST00000006786	Slc17a2	13;13;13;13;13;13;13;13;13;13;13;13	23807027;23810718;23812542;23814866;23815186;23817521;23819018;23819249;23819864;23820082;23820985;23822295	23807351;23810827;23812753;23815099;23815273;23817607;23819136;23819410;23819996;23820229;23821109;23825180	+;+;+;+;+;+;+;+;+;+;+;+	4629	0	0	0	0	0	0	0	0	0	3	0	0	0	0
ENSMUST00000006787	Hfe	13;13;13;13	23704386;23705624;23705861;23710627	23704426;23705734;23706136;23710714	-;-;-;-	516	0	0	0	0	0	0	0	0	0	0	0	0	0	0
ENSMUST00000006792	Ncr1	7;7;7;7;7;7;7	4337724;4337860;4338082;4340760;4341249;4344138;4344460	4337782;4337895;4338366;4341038;4341299;4344185;4345164	+;+;+;+;+;+;+	1463	0	0	0	0	0	0	0	0	0	0	0	0	0	0
ENSMUST00000006814	Abhd1	5;5;5;5;5;5;5;5;5;5	30950106;30952885;30953343;30953667;30953879;30954091;30954156;30954405;30954534;30954816	30950248;30953045;30953525;30953712;30953991;30954154;30954265;30954453;30954699;30955089	+;+;+;+;+;+;+;+;+;+	1309	0	0	0	0	0	0	0	0	0	0	0	0	0	0
ENSMUST00000006817	NA	5;5;5;5;5;5;5;5;5;5;5;5;5;5;5;5;5;5	31036037;31037103;31037409;31037714;31038014;31038942;31039304;31039754;31040362;31040658;31041144;31041544;31042138;31042579;31042950;31044513;31047630;31047966	31036953;31037218;31037512;31037892;31038100;31039009;31039416;31039842;31040491;31040798;31041298;31041611;31042189;31042644;31043459;31044581;31047799;31048009	-;-;-;-;-;-;-;-;-;-;-;-;-;-;-;-;-;-	3078	0	0	0	0	0	0	0	0	0	0	0	0	0	0
ENSMUST00000006818	Tcf23	5;5;5	30968677;30970075;30973482	30968997;30970317;30977018	+;+;+	4101	0	0	0	0	1	0	0	0	3	8	3	5	8	6
ENSMUST00000006825	Nphs1	7;7;7;7;7;7;7;7;7;7;7;7;7;7;7;7;7;7;7;7;7;7;7;7;7;7;7;7;7;7	30459725;30460324;30460614;30460904;30461516;30461974;30462602;30462815;30463152;30463512;30463778;30465466;30465752;30466009;30467220;30467441;30467903;30470590;30470848;30471092;30474277;30474471;30477859;30481381;30481642;30481741;30481977;30482465;30486585;30486839	30460243;30460539;30460736;30461032;30461597;30462077;30462729;30462986;30463309;30463656;30463902;30465652;30465881;30466181;30467360;30467581;30468024;30470761;30471004;30471243;30474388;30474652;30477915;30481500;30481666;30481816;30482070;30482580;30486749;30487223	+;+;+;+;+;+;+;+;+;+;+;+;+;+;+;+;+;+;+;+;+;+;+;+;+;+;+;+;+;+	4608	344	344	277	265	312	395	107	39	268	146	39	207	148	256
ENSMUST00000006828	Aplp1	7;7;7;7;7;7;7;7;7;7;7;7;7;7;7;7;7	30434981;30435476;30435746;30435973;30436179;30436787;30438178;30439935;30440144;30441055;30441642;30442170;30442480;30442798;30443092;30444318;30445322	30435391;30435619;30435808;30436043;30436202;30436894;30438277;30440063;30440302;30441129;30441772;30442360;30442613;30442910;30443224;30444461;30445582	-;-;-;-;-;-;-;-;-;-;-;-;-;-;-;-;-	2391	3902	3714	3945	3585	3856	3819	3024	3022	4360	4187	734	4115	3899	4466
ENSMUST00000006838	Qars	9;9;9;9;9;9;9;9;9;9;9;9;9;9;9;9;9;9;9;9;9;9;9;9	108508005;108508383;108508877;108509149;108509441;108510095;108510288;108511139;108511331;108511532;108512483;108512700;108512860;108513066;108513286;108513669;108513893;108514065;108514290;108514543;108514746;108514967;108515107;108515796	108508199;108508530;108508986;108509224;108509505;108510148;108510348;108511210;108511416;108511618;108512582;108512778;108512968;108513196;108513378;108513806;108513980;108514208;108514394;108514635;108514873;108515033;108515232;108515941	+;+;+;+;+;+;+;+;+;+;+;+;+;+;+;+;+;+;+;+;+;+;+;+	2501	0	0	1	1	1	1	0	0	1	1	0	0	1	3
ENSMUST00000006851	Qrich1	9;9;9;9;9;9;9;9;9;9;9	108517087;108518703;108528589;108533587;108541688;108542432;108544863;108555962;108556408;108556958;108559246	108517240;108518826;108528918;108534618;108541865;108542586;108544977;108556070;108556559;108557048;108560167	+;+;+;+;+;+;+;+;+;+;+	3362	3	6	13	1	3	4	1	2	0	0	0	0	0	0
ENSMUST00000006853	P4htm	9;9;9;9;9;9;9;9;9	108578826;108579716;108580016;108580719;108581842;108582847;108583642;108596899;108597208	108579308;108579839;108580106;108580904;108582004;108582943;108583832;108596980;108597600	-;-;-;-;-;-;-;-;-	1810	1180	934	1119	806	1140	1153	548	570	1744	1389	147	1258	1183	1704
ENSMUST00000006854	Usp19	9;9;9;9;9;9;9;9;9;9;9;9;9;9;9;9;9;9;9;9;9;9;9;9;9;9;9	108490676;108492471;108492968;108493136;108493350;108493564;108494016;108494367;108494627;108494812;108495034;108495537;108495811;108496070;108496305;108496852;108497066;108497896;108498123;108498442;108498680;108499095;108499294;108499592;108499850;108500091;108501194	108490895;108492730;108493000;108493264;108493483;108493863;108494238;108494523;108494698;108494927;108495254;108495732;108495944;108496228;108496415;108496962;108497167;108498036;108498241;108498579;108498993;108499205;108499510;108499744;108500010;108500269;108501697	+;+;+;+;+;+;+;+;+;+;+;+;+;+;+;+;+;+;+;+;+;+;+;+;+;+;+	4715	34	50	65	25	58	45	15	15	239	243	320	227	273	243
ENSMUST00000006856	Pola1	X;X;X;X;X;X;X;X;X;X;X;X;X;X;X;X;X;X;X;X;X;X;X;X;X;X;X;X;X;X;X;X;X;X;X;X;X	93304767;93375591;93420567;93461369;93463294;93474313;93480479;93488095;93490743;93492719;93493549;93561368;93561870;93573108;93575779;93577497;93578077;93580722;93582018;93584586;93585844;93586998;93591406;93593819;93594774;93596115;93597218;93603201;93603462;93603910;93604407;93605351;93605848;93620505;93623819;93626488;93632069	93305816;93375684;93420683;93461500;93463472;93474487;93480610;93488227;93490948;93492811;93493581;93561490;93562019;93573232;93575878;93577616;93578206;93580897;93582134;93584675;93585905;93587082;93591560;93593957;93594848;93596231;93597330;93603373;93603663;93603997;93604499;93605413;93605963;93620585;93623915;93626612;93632155	-;-;-;-;-;-;-;-;-;-;-;-;-;-;-;-;-;-;-;-;-;-;-;-;-;-;-;-;-;-;-;-;-;-;-;-;-	5346	75	91	98	85	88	86	47	62	272	227	72	197	165	283
ENSMUST00000006893	D130043K22Rik	13;13;13;13;13;13;13;13;13;13;13;13;13;13;13;13;13;13;13;13;13	24845135;24854410;24856652;24857921;24862638;24863594;24864733;24867089;24871254;24872219;24875909;24877935;24879596;24880770;24882541;24883741;24885578;24887836;24889824;24893361;24899621	24845299;24854555;24857427;24858110;24862736;24863691;24864820;24867181;24871386;24872447;24876032;24878067;24879744;24880921;24882679;24883900;24885720;24887958;24889914;24893452;24901270	+;+;+;+;+;+;+;+;+;+;+;+;+;+;+;+;+;+;+;+;+	4973	2	3	2	0	3	6	1	0	19	13	8	9	8	18
ENSMUST00000006898	Gmnn	13;13;13;13;13;13;13	24751845;24753348;24753658;24756600;24757596;24760160;24761587	24752230;24753458;24753740;24756735;24757673;24760217;24761861	-;-;-;-;-;-;-	1127	0	0	0	0	0	0	0	0	0	0	0	0	0	0
ENSMUST00000006900	Acot13	13;13;13	24817948;24820715;24831226	24818191;24820899;24831517	-;-;-	721	430	323	457	295	386	393	238	270	890	918	204	821	879	889
ENSMUST00000006903	Zfp184	13;13;13;13;13	21945793;21947003;21949660;21950234;21958424	21945799;21947070;21949786;21950329;21960339	+;+;+;+;+	2214	0	0	0	0	0	0	0	0	0	0	0	0	0	0
ENSMUST00000006911	Cdk4	10;10;10;10;10;10;10;10	127063534;127064220;127064585;127064835;127065155;127065953;127066101;127066929	127063759;127064453;127064720;127065002;127065264;127066003;127066236;127067920	+;+;+;+;+;+;+;+	2053	2	0	0	0	0	0	1	0	13	11	0	7	2	7
ENSMUST00000006912	Pip4k2a	2;2;2;2;2;2;2;2;2;2	18842255;18845875;18847434;18852813;18866112;18872284;18889052;18906229;18908055;18997852	18844460;18845978;18847677;18852926;18866150;18872430;18889204;18906325;18908152;18998126	-;-;-;-;-;-;-;-;-;-	3477	528	443	633	391	507	493	206	213	2028	1936	764	1675	1694	2104
ENSMUST00000006914	B4galnt1	10;10;10;10;10;10;10;10;10;10;10	127165156;127166004;127166718;127166999;127167502;127167701;127169744;127169978;127170591;127170919;127171616	127165519;127166222;127166882;127167105;127167542;127167881;127169842;127170168;127170731;127171159;127172340	+;+;+;+;+;+;+;+;+;+;+	2474	149	135	365	81	158	153	44	30	376	331	79	157	139	196
ENSMUST00000006915	Mettl1	10;10;10;10;10;10	127041932;127043060;127044467;127044756;127045026;127045279	127042070;127043223;127044651;127044869;127045127;127046365	+;+;+;+;+;+	1791	7	11	24	10	7	7	4	0	51	48	133	51	58	63
ENSMUST00000006948	NA	7;7;7;7;7;7;7;7;7;7;7;7;7	46689304;46689803;46692779;46699364;46699636;46700340;46701781;46702402;46702621;46704014;46706993;46708864;46710498	46689455;46689895;46692975;46699552;46699718;46700393;46702288;46702492;46702680;46704093;46707076;46708977;46710641	-;-;-;-;-;-;-;-;-;-;-;-;-	1849	2	0	1	0	0	0	0	0	1	0	0	1	1	2
ENSMUST00000006949	Tph2	10;10;10;10;10;10;10;10;10;10;10	115078641;115079975;115090702;115119825;115145991;115151085;115174052;115179322;115179523;115182756;115184785	115079841;115080108;115090797;115119951;115146126;115151281;115174119;115179422;115179706;115182899;115185022	-;-;-;-;-;-;-;-;-;-;-	2626	0	0	0	1	0	0	0	0	3	1	1	0	2	1
ENSMUST00000006952	Saa4	7;7;7;7	46728017;46730037;46731606;46732431	46729684;46730175;46731700;46732543	-;-;-;-	2015	0	1	3	3	0	1	0	0	1	0	0	0	0	0
ENSMUST00000006956	Saa3	7;7;7;7	46711998;46712589;46715010;46715647	46712264;46712727;46715104;46715676	-;-;-;-	531	2	0	0	1	3	0	0	0	3	0	1	0	0	0
ENSMUST00000006963	Krt28	11;11;11;11;11;11;11;11	99364872;99365442;99366824;99371111;99371317;99372759;99373912;99374396	99365185;99365497;99367041;99371236;99371478;99372915;99373994;99374903	-;-;-;-;-;-;-;-	1624	0	0	0	0	0	0	0	0	0	0	0	0	0	1
ENSMUST00000006969	Krt23	11;11;11;11;11;11;11;11	99477974;99480044;99480882;99483745;99483952;99485693;99486700;99492669	99478291;99480075;99481102;99483867;99484113;99485849;99486782;99493137	-;-;-;-;-;-;-;-	1565	39	143	218	106	62	54	26	34	471	595	295	459	503	436
ENSMUST00000006973	Kat2a	11;11;11;11;11;11;11;11;11;11;11;11;11;11;11;11;11;11	100704746;100705576;100705761;100705959;100706083;100706350;100706858;100708209;100708547;100708846;100709076;100709383;100710445;100710722;100711140;100711333;100711813;100712081	100705431;100705660;100705824;100705995;100706197;100706493;100706968;100708335;100708755;100708982;100709177;100709489;100710636;100710903;100711229;100711478;100711936;100712465	-;-;-;-;-;-;-;-;-;-;-;-;-;-;-;-;-;-	3043	0	0	0	0	0	0	0	0	0	0	0	0	0	0
ENSMUST00000006976	Ttc25	11;11;11;11;11;11;11;11;11;11;11	100545694;100549803;100550185;100550956;100551471;100553490;100553864;100561818;100563530;100566909;100571440	100545908;100549934;100550335;100551017;100551636;100553714;100554071;100561904;100563726;100567009;100572568	+;+;+;+;+;+;+;+;+;+;+	2673	37	44	48	50	44	44	7	15	277	282	121	210	245	327
ENSMUST00000006991	Hcn1	13;13;13;13;13;13;13;13	117602480;117656606;117809907;117873866;117902747;117925544;117971567;117975252	117603095;117657029;117810068;117874084;117902893;117925784;117971731;117976802	+;+;+;+;+;+;+;+	3525	237	181	241	163	320	288	104	90	260	198	12	181	146	347
ENSMUST00000007005	Acat2	17;17;17;17;17;17;17;17;17	12942890;12944400;12946261;12947357;12948514;12952252;12956219;12959995;12960609	12944032;12944510;12946415;12947479;12948657;12952369;12956400;12960129;12960747	-;-;-;-;-;-;-;-;-	2250	31	35	45	17	35	36	7	10	272	245	145	243	303	245
ENSMUST00000007007	Wtap	17;17;17;17;17;17;17;17	12966799;12969405;12975296;12980822;12981750;12983457;12985916;12992077	12968051;12969559;12975474;12980949;12981808;12983512;12985953;12992259	-;-;-;-;-;-;-;-	2051	0	0	0	0	0	0	0	0	0	0	0	0	0	0
ENSMUST00000007012	Sod2	17;17;17;17;17	13007839;13008184;13010520;13013433;13015026	13008068;13008386;13010636;13013612;13018119	+;+;+;+;+	3824	686	631	789	543	683	684	322	354	1827	1740	650	1535	1648	1854
ENSMUST00000007042	Ik	18;18;18;18;18;18;18;18;18;18;18;18;18;18;18;18;18;18;18;18	36744656;36745611;36747348;36748164;36748551;36748871;36749214;36749391;36751104;36752357;36753262;36753427;36753892;36754553;36755425;36755697;36756548;36756822;36757284;36757407	36744788;36745677;36747440;36748223;36748718;36748985;36749284;36749437;36751267;36752465;36753301;36753652;36753910;36754631;36755505;36755754;36756636;36756930;36757318;36757639	+;+;+;+;+;+;+;+;+;+;+;+;+;+;+;+;+;+;+;+	1996	1335	1200	1434	1024	1333	1325	723	704	2389	2228	507	2034	1959	2608
ENSMUST00000007046	Tmco6	18;18;18;18;18;18;18;18;18;18;18;18	36735068;36735388;36737457;36737669;36738096;36738362;36738628;36738953;36739155;36741052;36741662;36742047	36735256;36735500;36737572;36737852;36738200;36738447;36738744;36739064;36739341;36741146;36741829;36742391	+;+;+;+;+;+;+;+;+;+;+;+	1817	327	242	364	247	369	347	113	128	738	583	271	619	574	789
ENSMUST00000007130	Ctnnb1	9;9;9;9;9;9;9;9;9;9;9;9;9;9;9	120933400;120950173;120950522;120950894;120951267;120951586;120952859;120955148;120955329;120955814;120957107;120957517;120957759;120958592;120959309	120933638;120950233;120950749;120951147;120951505;120951787;120953003;120955251;120955667;120955972;120957226;120957667;120957880;120958652;120960507	+;+;+;+;+;+;+;+;+;+;+;+;+;+;+	3623	0	0	0	0	0	0	0	0	0	0	0	0	0	0
ENSMUST00000007131	Acly	11;11;11;11;11;11;11;11;11;11;11;11;11;11;11;11;11;11;11;11;11;11;11;11;11;11;11;11	100476356;100478015;100478328;100479184;100481377;100481697;100482145;100483709;100484600;100492505;100493537;100493884;100495860;100498185;100498621;100504203;100504855;100512876;100514276;100514962;100515902;100516776;100519089;100519615;100520291;100521982;100523440;100527795	100477338;100478091;100478410;100479297;100481520;100481847;100482299;100483802;100484727;100492615;100493618;100494080;100495964;100498353;100498762;100504293;100505009;100512993;100514337;100515098;100516020;100516906;100519168;100519805;100520353;100522104;100523621;100528000	-;-;-;-;-;-;-;-;-;-;-;-;-;-;-;-;-;-;-;-;-;-;-;-;-;-;-;-	4393	0	0	0	0	0	0	0	0	0	0	0	0	0	0
ENSMUST00000007139	Eif1b	9;9;9;9	120492606;120494107;120494535;120494913	120492841;120494270;120494636;120495327	+;+;+;+	917	628	558	637	467	561	586	297	350	1343	1290	757	1232	1321	1292
ENSMUST00000007156	Klk1b11	7;7;7;7;7	43995877;43997690;43998777;43999160;43999671	43995950;43997849;43999063;43999296;43999875	+;+;+;+;+	863	0	1	0	0	0	0	0	0	0	2	0	0	0	0
ENSMUST00000007161	Klk4	7;7;7;7;7;7	43881172;43881641;43883556;43883946;43884280;43885234	43881214;43881712;43883718;43884196;43884416;43885804	+;+;+;+;+;+	1237	5	1	0	0	0	0	0	0	4	10	0	6	7	25
ENSMUST00000007171	Chrd	16;16;16;16;16;16;16;16;16;16;16;16;16;16;16;16;16;16;16;16;16;16;16	20733127;20733531;20734007;20734273;20734487;20734686;20735117;20735371;20735581;20735746;20736037;20736264;20736909;20737342;20738194;20738553;20738904;20739111;20739407;20739954;20741190;20741496;20741925	20733295;20733634;20734136;20734401;20734586;20734773;20735258;20735499;20735663;20735893;20736143;20736383;20737065;20737562;20738307;20738816;20738997;20739164;20739510;20740056;20741344;20741595;20742384	+;+;+;+;+;+;+;+;+;+;+;+;+;+;+;+;+;+;+;+;+;+;+	3275	0	0	0	0	0	0	0	0	0	0	0	0	0	0
ENSMUST00000007207	Clcn2	16;16;16;16;16;16;16;16;16;16;16;16;16;16;16;16;16;16;16;16;16;16;16;16	20702964;20703555;20707174;20707419;20707573;20707843;20708077;20708294;20708634;20709102;20709570;20709880;20710272;20710555;20711690;20711892;20712057;20712312;20712472;20712654;20712880;20713328;20713613;20715909	20703437;20703641;20707278;20707457;20707632;20707916;20708191;20708466;20708767;20709315;20709680;20709949;20710427;20710639;20711791;20711976;20712182;20712390;20712549;20712787;20713008;20713459;20713769;20716117	-;-;-;-;-;-;-;-;-;-;-;-;-;-;-;-;-;-;-;-;-;-;-;-	3128	0	0	0	0	0	0	0	0	0	1	0	0	0	0
ENSMUST00000007212	Psmd2	16;16;16;16;16;16;16;16;16;16;16;16;16;16;16;16;16;16;16;16;16	20651652;20652244;20652593;20654548;20654818;20655253;20655559;20655881;20656543;20656868;20657482;20657974;20659406;20659679;20659957;20660343;20661565;20661816;20662093;20662622;20663063	20651851;20652300;20652757;20654669;20655042;20655411;20655703;20655941;20656689;20656974;20657609;20658061;20659568;20659780;20660102;20660426;20661733;20661910;20662219;20662740;20663414	+;+;+;+;+;+;+;+;+;+;+;+;+;+;+;+;+;+;+;+;+	2961	0	0	0	0	0	0	0	0	0	0	0	0	0	0
ENSMUST00000007216	Ap2m1	16;16;16;16;16;16;16;16;16;16;16;16	20535480;20537618;20539308;20540333;20540808;20540975;20541210;20541747;20541956;20542197;20542639;20543311	20535601;20537734;20539573;20540415;20540813;20541110;20541351;20541866;20542091;20542294;20542750;20544909	+;+;+;+;+;+;+;+;+;+;+;+	2937	21	23	18	13	28	26	8	5	129	112	100	118	125	116
ENSMUST00000007236	Syngr3	17;17;17;17	24685092;24686519;24687503;24689721	24686440;24686661;24687740;24689955	-;-;-;-	1965	248	221	326	202	270	267	82	99	930	722	73	591	602	941
ENSMUST00000007245	Vwa7	17;17;17;17;17;17;17;17;17;17;17;17;17;17;17;17;17	35016579;35017057;35017693;35018388;35019038;35019662;35019971;35021148;35021511;35022648;35023365;35023612;35023850;35024170;35024543;35024856;35025135	35016767;35017305;35017974;35018484;35019148;35019857;35020140;35021260;35021627;35022833;35023497;35023764;35023942;35024471;35024682;35025030;35026741	+;+;+;+;+;+;+;+;+;+;+;+;+;+;+;+;+	4313	1	1	1	0	0	0	0	0	3	1	0	7	3	2
ENSMUST00000007248	Hspa1l	17;17	34972703;34976974	34972862;34979285	+;+	2472	13	10	14	7	15	15	10	9	4	4	3	5	4	16
ENSMUST00000007249	Slc44a4	17;17;17;17;17;17;17;17;17;17;17;17;17;17;17;17;17;17;17;17;17	34914470;34916647;34917318;34917517;34918239;34918420;34918845;34921065;34921232;34921528;34921862;34923428;34923748;34927674;34928018;34928206;34928420;34928635;34928808;34928979;34930115	34914520;34916695;34917391;34917595;34918338;34918542;34918905;34921155;34921315;34921763;34921961;34923520;34923850;34927924;34928112;34928309;34928493;34928705;34928902;34929063;34930356	+;+;+;+;+;+;+;+;+;+;+;+;+;+;+;+;+;+;+;+;+	2261	0	0	0	0	0	0	0	0	0	0	0	0	0	0
ENSMUST00000007250	Msh5	17;17;17;17;17;17;17;17;17;17;17;17;17;17;17;17;17;17;17;17;17;17;17;17	35028605;35029196;35029653;35029878;35030201;35030609;35031148;35031354;35031679;35032341;35032760;35033223;35033590;35038406;35039201;35041470;35042098;35043729;35044025;35044317;35045114;35045294;35045930;35046231	35028852;35029269;35029790;35030021;35030275;35030758;35031274;35031543;35031766;35032421;35032869;35033295;35033718;35038468;35039339;35041515;35042180;35043764;35044134;35044438;35045176;35045374;35046053;35046622	-;-;-;-;-;-;-;-;-;-;-;-;-;-;-;-;-;-;-;-;-;-;-;-	2886	0	0	0	0	0	0	0	0	0	0	0	0	0	0
ENSMUST00000007251	Abhd16a	17;17;17;17;17;17;17;17;17;17;17;17;17;17;17;17;17;17;17;17	35089291;35090369;35091022;35091571;35094251;35096304;35096482;35098694;35098899;35100335;35100639;35100962;35101242;35101542;35101828;35101970;35102146;35102298;35102475;35102670	35089456;35090425;35091088;35091657;35094336;35096377;35096604;35098808;35099000;35100398;35100688;35101085;35101346;35101605;35101884;35102032;35102222;35102396;35102521;35102987	+;+;+;+;+;+;+;+;+;+;+;+;+;+;+;+;+;+;+;+	1945	0	0	1	0	0	0	0	0	3	2	0	3	1	1
ENSMUST00000007253	Neu1	17;17;17;17;17;17	34931253;34931916;34932566;34934003;34934283;34934605	34931547;34932108;34932828;34934185;34934505;34935921	+;+;+;+;+;+	2474	3	1	1	0	0	5	0	0	5	2	0	4	4	1
ENSMUST00000007255	Ddah2	17;17;17;17;17;17;17	35059035;35060103;35060603;35060833;35061005;35061476;35061791	35059272;35060461;35060702;35060906;35061124;35061625;35062091	+;+;+;+;+;+;+	1342	0	0	0	0	0	0	0	0	2	0	0	2	2	1
ENSMUST00000007257	Clic1	17;17;17;17;17;17	35049966;35052435;35052781;35053033;35055227;35058330	35050486;35052544;35052906;35053139;35055408;35058749	+;+;+;+;+;+	1466	265	217	349	179	265	277	111	148	652	565	491	539	575	623
ENSMUST00000007259	Ly6g6d	17;17;17	35071443;35074175;35074410	35071759;35074312;35074500	-;-;-	546	0	1	0	0	0	0	0	0	2	2	12	2	5	3
ENSMUST00000007266	Lsm2	17;17;17;17;17	34982129;34982620;34985109;34985249;34985417	34982367;34982687;34985139;34985308;34985891	+;+;+;+;+	873	0	0	0	0	0	0	0	0	0	0	0	0	0	0
ENSMUST00000007272	Krt14	11;11;11;11;11;11;11;11	100203162;100203956;100204108;100204424;100204633;100204948;100205621;100206913	100203409;100204020;100204328;100204549;100204794;100205104;100205703;100207548	-;-;-;-;-;-;-;-	1698	0	87	73	2	6	10	4	0	19	13	1	20	8	21
ENSMUST00000007275	Krt13	11;11;11;11;11;11;11;11	100117327;100117983;100118733;100119044;100119281;100119622;100119973;100121025	100117666;100118005;100118953;100119169;100119442;100119778;100120055;100121566	-;-;-;-;-;-;-;-	1654	0	0	0	0	0	0	0	0	1	0	1	0	0	0
ENSMUST00000007280	Krt16	11;11;11;11;11;11;11;11	100246091;100246469;100246610;100247102;100247314;100247562;100247857;100248372	100246328;100246515;100246830;100247227;100247475;100247718;100247939;100248902	-;-;-;-;-;-;-;-	1565	0	4	1	0	0	0	0	0	0	0	0	0	0	0
ENSMUST00000007296	Pole	5;5;5;5;5;5;5;5;5;5;5;5;5;5;5;5;5;5;5;5;5;5;5;5;5;5;5;5;5;5;5;5;5;5;5;5;5;5;5;5;5;5;5;5;5;5;5;5;5	110286306;110289233;110289782;110290226;110290405;110290959;110293260;110293715;110294509;110294892;110295228;110295518;110297006;110297348;110297733;110298241;110298892;110299100;110299289;110299773;110302008;110303575;110303855;110306327;110306767;110308936;110312007;110312734;110312906;110317790;110318226;110318616;110323538;110323930;110324160;110324421;110324680;110325084;110325512;110327702…	110286449;110289374;110289862;110290270;110290497;110291113;110293401;110293795;110294616;110295002;110295313;110295637;110297138;110297461;110297945;110298348;110299020;110299202;110299435;110299918;110302156;110303667;110303999;110306484;110306962;110309150;110312109;110312814;110313028;110317999;110318435;110318759;110323678;110324083;110324266;110324597;110324903;110325304;110325716;110327875…	+;+;+;+;+;+;+;+;+;+;+;+;+;+;+;+;+;+;+;+;+;+;+;+;+;+;+;+;+;+;+;+;+;+;+;+;+;+;+;+;+;+;+;+;+;+;+;+;+	7163	10	12	23	11	15	12	3	9	4	1	0	4	0	1
ENSMUST00000007301	Myh3	11;11;11;11;11;11;11;11;11;11;11;11;11;11;11;11;11;11;11;11;11;11;11;11;11;11;11;11;11;11;11;11;11;11;11;11;11;11;11;11	67078300;67079988;67082282;67082851;67083399;67083750;67084075;67084795;67084943;67086345;67086528;67087245;67087449;67088558;67088818;67089241;67090189;67090360;67090752;67090969;67091883;67092331;67093137;67093441;67093667;67094474;67094955;67096009;67096301;67096875;67097879;67098578;67099178;67099600;67099876;67100798;67101088;67101338;67101528;67102140	67078332;67080202;67082425;67083007;67083426;67083858;67084167;67084858;67085041;67086448;67086666;67087363;67087598;67088728;67089124;67089311;67090276;67090477;67090875;67091105;67092138;67092573;67093313;67093586;67093757;67094863;67095081;67096127;67096497;67097058;67098044;67098702;67099486;67099803;67100001;67100968;67101192;67101433;67101665;67102291	+;+;+;+;+;+;+;+;+;+;+;+;+;+;+;+;+;+;+;+;+;+;+;+;+;+;+;+;+;+;+;+;+;+;+;+;+;+;+;+	5992	0	0	0	0	0	0	0	0	0	0	0	0	0	0
ENSMUST00000007317	Krt19	11;11;11;11;11;11	100140810;100141280;100141523;100142052;100142426;100145431	100141167;100141405;100141684;100142208;100142508;100146120	-;-;-;-;-;-	1576	0	23	29	5	5	5	2	0	7	6	7	15	6	15
ENSMUST00000007318	Krt31	11;11;11;11;11;11;11	100046646;100047669;100048118;100048340;100049440;100049865;100050135	100047060;100047889;100048243;100048501;100049596;100049947;100050551	-;-;-;-;-;-;-	1581	0	0	0	1	0	0	0	0	1	1	0	1	0	2
ENSMUST00000007340	Atp12a	14;14;14;14;14;14;14;14;14;14;14;14;14;14;14;14;14;14;14;14;14;14;14	56365068;56365949;56368383;56370776;56371739;56372579;56372843;56373188;56374427;56374760;56376138;56378283;56379948;56380763;56382497;56384067;56384326;56385793;56386112;56386848;56387150;56387640;56387893	56365289;56366098;56368442;56370976;56371852;56372713;56372960;56373456;56374625;56374869;56376272;56378475;56380123;56380899;56382647;56384235;56384480;56385916;56386257;56386981;56387251;56387731;56388551	+;+;+;+;+;+;+;+;+;+;+;+;+;+;+;+;+;+;+;+;+;+;+	3951	0	0	2	0	3	0	0	1	0	7	10	5	4	3
ENSMUST00000007423	Scube2	7;7;7;7;7;7;7;7;7;7;7;7;7;7;7;7;7;7;7;7;7;7	109798676;109800574;109804608;109806043;109808409;109809078;109810585;109824765;109825319;109829035;109831128;109831667;109833009;109836994;109838080;109843180;109843877;109846923;109852434;109857521;109864105;109865460	109799405;109800653;109804760;109806240;109808570;109809245;109810755;109824971;109825474;109829139;109831244;109831789;109833125;109837116;109838196;109843269;109843993;109847048;109852568;109857646;109864227;109865586	-;-;-;-;-;-;-;-;-;-;-;-;-;-;-;-;-;-;-;-;-;-	3571	0	0	0	0	0	0	0	0	0	0	0	0	0	0
ENSMUST00000007433	Kiss1	1;1;1	133321875;133327210;133329356	133321976;133327340;133329901	+;+;+	779	0	0	0	0	0	0	0	0	0	0	0	0	0	0
ENSMUST00000007444	Strada	11;11;11;11;11;11;11;11;11;11;11;11;11	106163351;106164431;106164720;106167812;106168309;106170954;106171156;106173253;106173679;106180955;106184562;106187101;106193466	106164191;106164473;106164961;106167916;106168480;106171077;106171264;106173374;106173781;106180983;106184619;106187180;106193536	-;-;-;-;-;-;-;-;-;-;-;-;-	2099	0	0	0	0	0	0	0	0	0	0	0	0	0	0
ENSMUST00000007449	Akr1b7	6;6;6;6;6;6;6;6;6;6	34412334;34415320;34416118;34417283;34418994;34419408;34419919;34420446;34421063;34422846	34412475;34415487;34416234;34417360;34419116;34419514;34420000;34420529;34421145;34423142	+;+;+;+;+;+;+;+;+;+	1281	0	1	0	0	0	0	0	0	2	0	1	0	1	0
ENSMUST00000007482	Mrpl49	19;19;19;19	6053630;6055076;6056929;6057659	6054982;6055200;6057079;6057751	-;-;-;-	1722	554	477	674	386	541	590	239	262	1122	904	258	793	821	1121
ENSMUST00000007533	Vps25	11;11;11;11;11;11	101253707;101254031;101254943;101256009;101256878;101257901	101253807;101254176;101254996;101256097;101256953;101258049	+;+;+;+;+;+	615	5	2	1	0	1	0	0	1	18	9	13	6	14	6
ENSMUST00000007559	Gatad1	5;5;5;5;5	3639961;3643558;3644881;3646784;3647380	3641580;3643741;3644940;3646909;3647934	-;-;-;-;-	2545	190	179	253	158	172	181	103	102	609	509	329	487	539	614
ENSMUST00000007584	Pcdhac1	18;18;18;18	37090136;37156155;37159265;37184946	37092571;37156213;37159353;37187657	+;+;+;+	5296	39	28	28	36	38	49	19	22	7	3	6	4	2	11
ENSMUST00000007601	2310003L06Rik	5;5;5	87969459;87970639;87971440	87969556;87970712;87972870	+;+;+	1603	4	2	5	0	6	19	8	5	2	1	6	4	0	10
ENSMUST00000007602	M6pr	6;6;6;6;6;6;6	122308720;122312234;122313259;122315057;122315304;122316050;122316328	122309166;122312413;122313425;122315166;122315434;122316176;122317680	+;+;+;+;+;+;+	2515	0	0	0	0	0	0	0	0	0	0	0	0	0	0
ENSMUST00000007708	Ppp2r1a	17;17;17;17;17;17;17;17;17;17;17;17;17;17;17	20945311;20951343;20954615;20955788;20956705;20956957;20958720;20958940;20959389;20960466;20960953;20961585;20962574;20965239;20965455	20945583;20951433;20954715;20956020;20956852;20957112;20958834;20959010;20959523;20960639;20961013;20961739;20962716;20965330;20965916	+;+;+;+;+;+;+;+;+;+;+;+;+;+;+	2410	625	571	693	504	639	623	359	337	1202	1168	658	1153	1143	1231
ENSMUST00000007733	Tinf2	14;14;14;14;14;14;14;14;14	55679083;55679514;55679866;55680015;55680611;55680795;55681000;55681225;55681390	55679409;55679605;55679930;55680456;55680707;55680902;55681089;55681311;55681817	-;-;-;-;-;-;-;-;-	1736	161	146	213	119	183	168	76	63	390	336	335	289	363	353
ENSMUST00000007735	Tssk4	14;14;14;14	55650184;55650901;55651459;55652119	55650573;55651115;55651852;55652539	+;+;+;+	1420	0	0	0	0	0	0	0	0	0	0	0	0	0	0
ENSMUST00000007738	Hapln4	8;8;8;8;8	70083529;70084420;70084782;70086808;70088130	70083563;70084540;70085144;70087131;70090862	+;+;+;+;+	3576	0	3	0	5	3	0	2	2	7	8	20	7	3	3
ENSMUST00000007747	Dus3l	17;17;17;17;17;17;17;17;17;17;17;17;17	56764751;56765525;56766782;56767633;56767783;56768034;56768348;56768518;56768806;56769050;56769250;56769534;56769736	56764941;56765792;56767288;56767674;56767935;56768150;56768413;56768628;56768902;56769125;56769438;56769662;56770092	+;+;+;+;+;+;+;+;+;+;+;+;+	2303	755	684	775	551	831	716	264	247	793	665	254	663	639	1047
ENSMUST00000007754	Gtpbp3	8;8;8;8;8;8;8;8;8	71488103;71489071;71489428;71490335;71490895;71491066;71491425;71492077;71492539	71488840;71489318;71489514;71490537;71490967;71491209;71491590;71492355;71493400	+;+;+;+;+;+;+;+;+	2800	0	0	0	0	0	0	0	0	0	0	0	0	0	0
ENSMUST00000007757	Tgfbr1	4;4;4;4;4;4;4;4;4	47353222;47383749;47393247;47396355;47402803;47403370;47405529;47406922;47410652	47353396;47383994;47393489;47396585;47402970;47403526;47405653;47407052;47414931	+;+;+;+;+;+;+;+;+	5756	404	410	505	242	358	280	264	182	2120	1942	801	2026	1597	2255
ENSMUST00000007790	Rad51c	11;11;11;11;11;11;11;11;11	87379097;87380832;87388619;87389834;87395266;87397624;87401390;87402598;87404595	87379487;87380892;87388679;87389900;87395397;87397757;87401556;87402856;87404954	-;-;-;-;-;-;-;-;-	1632	0	0	0	0	0	0	0	0	0	0	0	0	0	0
ENSMUST00000007797	Gabrb2	11;11;11;11;11;11;11;11;11;11	42419757;42421201;42421552;42422581;42487196;42529412;42591858;42593797;42597541;42626544	42420034;42421426;42421643;42422648;42487416;42529494;42591995;42593949;42597785;42629028	+;+;+;+;+;+;+;+;+;+	3989	0	2	1	1	1	1	2	0	0	1	0	1	0	0
ENSMUST00000007799	Cav1	6;6;6	17306335;17307881;17339113	17306479;17308045;17341324	+;+;+	2522	0	0	0	0	0	0	0	0	0	0	0	0	0	0
ENSMUST00000007800	Arpp19	9;9;9	75037718;75052233;75056635	75037961;75052355;75060313	+;+;+	4046	0	0	0	0	0	0	0	0	0	0	0	0	0	0
ENSMUST00000007803	Bcl2l1	2;2;2	152780668;152829427;152831603	152782282;152830102;152831728	-;-;-	2417	2	1	1	1	1	0	0	1	2	0	0	0	0	3
ENSMUST00000007814	Khsrp	17;17;17;17;17;17;17;17;17;17;17;17;17;17;17;17;17;17	57021058;57023059;57023213;57023505;57023827;57024011;57024247;57024789;57024980;57025308;57025496;57025880;57026843;57027049;57027817;57027956;57029042;57031148	57022970;57023136;57023413;57023593;57023936;57024171;57024492;57024891;57025078;57025406;57025670;57025937;57026914;57027098;57027856;57027994;57029138;57031507	-;-;-;-;-;-;-;-;-;-;-;-;-;-;-;-;-;-	3990	1437	1374	1665	1149	1724	1478	532	485	2250	2095	316	1948	1805	2807
ENSMUST00000007865	Ccdc124	8;8;8;8;8	70868227;70868737;70868933;70869905;70873459	70868645;70868851;70869107;70870074;70873490	-;-;-;-;-	911	523	489	623	385	559	577	292	265	1163	1013	168	974	1054	1166
ENSMUST00000007884	Zfp54	17;17;17;17	21423233;21427737;21430195;21433403	21423561;21427828;21430321;21435154	+;+;+;+	2300	0	0	0	0	0	0	0	0	0	0	0	0	0	0
ENSMUST00000007921	0610009B22Rik	11;11	51685386;51688548	51686092;51688653	-;-	813	10	12	16	9	15	13	12	16	43	37	2	33	29	48
ENSMUST00000007949	Twist2	1;1	91801461;91847389	91802149;91848028	+;+	1329	13	7	22	8	16	18	8	7	40	48	28	75	114	143
ENSMUST00000007959	Rhoa	9;9;9;9;9;9	108306205;108315308;108327584;108330871;108335051;108336648	108306553;108315382;108327741;108330991;108335181;108337939	+;+;+;+;+;+	2126	1277	1265	1553	1148	1326	1344	744	802	2015	1974	682	1801	1836	2143
ENSMUST00000007961	Zmiz1	14;14;14;14;14;14;14;14;14;14;14;14;14;14;14;14;14;14;14;14;14;14;14;14	25459267;25502655;25536745;25572020;25576131;25581568;25635873;25643558;25644656;25645659;25646735;25649668;25650525;25651219;25651847;25653323;25654499;25655097;25656023;25656324;25656746;25658107;25661267;25662940	25459556;25502759;25536824;25572128;25576244;25581673;25636017;25643672;25644873;25645857;25647007;25649850;25650605;25651393;25651988;25653533;25654604;25655257;25656090;25656392;25656990;25658273;25661521;25664719	+;+;+;+;+;+;+;+;+;+;+;+;+;+;+;+;+;+;+;+;+;+;+;+	5397	0	0	0	0	0	0	0	0	0	0	0	0	0	0
ENSMUST00000007977	NA	7;7;7;7;7;7;7;7;7;7;7;7;7;7;7;7;7	45140905;45142780;45143113;45144513;45144867;45145476;45145685;45145903;45146194;45146623;45147162;45147399;45147725;45147884;45148614;45149664;45154392	45142102;45142902;45143298;45144714;45145034;45145606;45145790;45146039;45146289;45146808;45147314;45147580;45147802;45148062;45148740;45149766;45154573	-;-;-;-;-;-;-;-;-;-;-;-;-;-;-;-;-	3537	0	0	0	0	0	0	0	0	0	0	0	0	0	0
ENSMUST00000007980	Hnrnpa0	13	58125879	58128556	-	2678	979	940	1240	695	1006	813	540	481	3574	3552	1578	3434	3504	3618
ENSMUST00000007981	Prrg2	7;7;7;7;7;7;7	45053613;45054519;45056743;45059972;45060205;45060741;45061588	45054197;45054647;45056884;45060011;45060386;45060892;45061652	-;-;-;-;-;-;-	1295	0	0	0	0	0	0	0	0	0	0	0	0	0	0
ENSMUST00000007993	Rbm28	6;6;6;6;6;6;6;6;6;6;6;6;6;6;6;6;6;6;6	29123573;29127798;29128429;29131267;29131627;29135408;29137579;29138503;29139553;29143554;29152282;29154754;29155027;29157068;29158170;29158847;29159656;29160037;29164491	29125524;29127900;29128685;29131341;29131776;29135566;29137643;29138638;29139626;29143663;29152354;29154893;29155189;29157139;29158262;29158922;29159750;29160195;29165006	-;-;-;-;-;-;-;-;-;-;-;-;-;-;-;-;-;-;-	4468	328	269	313	199	306	247	164	97	1004	942	346	870	878	1064
ENSMUST00000008004	Ddx49	8;8;8;8;8;8;8;8;8;8;8;8;8	70292866;70293828;70293999;70294687;70295367;70295575;70296383;70296903;70297131;70297876;70298081;70300979;70302323	70293687;70293899;70294087;70294761;70295464;70295651;70296458;70297043;70297318;70297997;70298166;70301102;70302489	-;-;-;-;-;-;-;-;-;-;-;-;-	2137	0	0	0	0	0	0	0	0	0	1	0	0	1	0
ENSMUST00000008011	Gm9946	6;6;6	117559697;117562829;117567534	117559902;117562987;117568193	+;+;+	1025	0	0	0	0	0	0	0	0	0	0	1	0	0	0
ENSMUST00000008016	Id3	4;4;4	136143497;136144294;136144880	136144178;136144376;136145392	+;+;+	1278	7	30	44	12	22	20	10	19	216	249	279	246	308	233
ENSMUST00000008021	Tcap	11;11	98383811;98384152	98383956;98384953	+;+	948	0	0	3	2	0	0	0	0	7	11	7	8	7	3
ENSMUST00000008024	Arid1a	4;4;4;4;4;4;4;4;4;4;4;4;4;4;4;4;4;4;4;4	133679941;133684435;133684874;133686229;133686404;133686640;133687204;133687538;133689054;133691070;133692799;133693005;133693758;133694663;133695572;133695916;133719537;133720550;133722839;133756395	133682055;133684565;133685765;133686325;133686556;133686790;133687376;133687670;133689261;133691279;133692908;133693150;133694070;133694830;133695661;133696156;133719653;133720999;133723051;133756769	-;-;-;-;-;-;-;-;-;-;-;-;-;-;-;-;-;-;-;-	6486	7	18	14	10	17	11	1	2	31	32	3	23	21	29
ENSMUST00000008032	Crlf1	8;8;8;8;8;8;8;8;8	70493158;70498597;70499093;70499330;70500884;70501110;70503305;70503597;70503821	70493400;70498878;70499222;70499499;70501041;70501278;70503492;70503639;70504081	+;+;+;+;+;+;+;+;+	1644	2	20	44	2	5	4	1	0	20	19	3	22	23	16
ENSMUST00000008036	Rplp1	9;9;9	61913284;61913888;61914357	61913521;61913962;61914538	-;-;-	495	560	604	640	538	587	578	437	498	618	616	650	633	625	621
ENSMUST00000008051	Cabs1	5;5	87979439;87981396	87980794;87981544	+;+	1505	7	0	7	2	1	4	2	3	123	259	329	164	95	189
ENSMUST00000008052	Hmgcll1	9;9;9;9;9;9;9;9;9	76014855;76056171;76056452;76072627;76074668;76081391;76084303;76130312;76133755	76015182;76056251;76056559;76072722;76074816;76081454;76084491;76130437;76136350	+;+;+;+;+;+;+;+;+	3737	0	0	0	0	0	0	0	0	0	0	0	0	0	0
ENSMUST00000008088	Ttc9b	7;7;7	27653915;27654912;27655911	27654347;27655094;27656208	+;+;+	914	228	184	218	149	174	214	79	88	606	518	307	410	511	481
ENSMUST00000008090	Phox2a	7;7;7	101818313;101820781;101821708	101818714;101820968;101822726	+;+;+	1609	0	0	0	0	0	0	0	0	0	0	0	0	0	1
ENSMUST00000008094	Abhd8	8;8;8;8;8	71456700;71458038;71458378;71461246;71463466	71457377;71458254;71458548;71461972;71463657	-;-;-;-;-	1985	1006	857	1130	705	993	1023	384	448	1437	1155	347	1032	991	1308
ENSMUST00000008131	Ift22	5;5;5;5;5	136908150;136911124;136911302;136911689;136912825	136908270;136911200;136911391;136911891;136913244	+;+;+;+;+	911	678	567	669	501	654	664	333	365	1054	866	225	796	897	1060
ENSMUST00000008179	Mid1ip1	X;X	10717390;10717987	10717704;10719690	+;+	2019	0	0	0	0	0	0	0	0	0	0	0	0	0	0
ENSMUST00000008273	Prok2	6;6	99711299;99726228	99712457;99726392	-;-	1324	0	0	0	0	0	0	0	0	0	0	0	0	0	0
ENSMUST00000008280	Fhl2	1;1;1;1;1;1	43123074;43128244;43131652;43141698;43153076;43163702	43123665;43128430;43131821;43141872;43153254;43163961	-;-;-;-;-;-	1563	1	4	2	0	1	0	0	1	14	21	39	15	14	13
ENSMUST00000008284	NA	7;7;7;7;7;7;7	44489938;44491955;44492144;44492554;44493190;44494808;44496256	44490970;44492048;44492325;44492658;44493299;44494880;44496513	-;-;-;-;-;-;-	1855	0	0	0	0	0	0	0	0	0	0	0	0	0	0
ENSMUST00000008297	Clstn3	6;6;6;6;6;6;6;6;6;6;6;6;6;6;6;6;6;6	124430759;124431958;124436818;124437375;124438270;124438759;124449490;124449774;124450706;124451306;124456877;124457856;124458544;124459158;124459766;124461532;124462110;124464421	124431732;124432160;124436953;124437520;124438440;124438985;124449638;124449931;124450759;124451468;124456989;124458137;124458729;124459307;124459974;124461727;124462232;124464794	-;-;-;-;-;-;-;-;-;-;-;-;-;-;-;-;-;-	4014	15	15	20	16	14	11	6	5	0	0	0	0	0	1
ENSMUST00000008350	Cers4	8;8;8;8;8;8;8;8;8;8;8	4493199;4515555;4516873;4518240;4518603;4519463;4520216;4520554;4521174;4523354;4523604	4493590;4515728;4516990;4518358;4518660;4519513;4520308;4520682;4521280;4523510;4531680	+;+;+;+;+;+;+;+;+;+;+	9475	15	21	21	12	25	9	5	2	290	263	212	281	299	250
ENSMUST00000008445	Phax	18;18;18;18;18	56572822;56575462;56580180;56584291;56586877	56573135;56576048;56580300;56584374;56587712	+;+;+;+;+	1942	58	62	78	57	71	65	40	26	333	338	331	306	352	367
ENSMUST00000008451	1700109H08Rik	5;5;5;5;5;5	3571673;3575623;3577240;3580405;3582143;3584240	3571810;3575778;3577344;3580556;3582247;3584356	+;+;+;+;+;+	773	0	0	1	0	0	1	0	0	0	0	0	0	1	1
ENSMUST00000008462	Relt	7;7;7;7;7;7;7;7;7;7;7	100845848;100847396;100848019;100848422;100848799;100850065;100851093;100851354;100851640;100853046;100863294	100847277;100847594;100848273;100848503;100848879;100850322;100851172;100851520;100851714;100853115;100863446	-;-;-;-;-;-;-;-;-;-;-	2850	3	9	10	2	1	2	2	3	27	25	30	18	28	34
ENSMUST00000008477	Snrpb2	2;2;2;2;2;2;2	143063039;143064542;143065176;143068261;143069374;143070888;143071396	143063098;143064630;143065348;143068401;143069424;143070976;143072853	+;+;+;+;+;+;+	2061	0	0	0	0	0	1	0	0	1	0	0	2	1	1
ENSMUST00000008517	Prpf31	7;7;7;7;7;7;7;7;7;7;7;7;7;7	3629985;3630558;3630845;3632668;3633304;3634124;3634693;3636201;3636662;3638631;3638858;3639576;3639789;3640797	3630056;3630742;3630905;3632751;3633401;3634230;3634862;3636358;3636751;3638758;3638930;3639704;3639887;3642486	+;+;+;+;+;+;+;+;+;+;+;+;+;+	3144	2	0	0	0	0	0	0	0	0	0	0	0	0	0
ENSMUST00000008528	Sertad1	7;7	27486910;27489253	27487078;27490316	+;+	1233	92	118	139	58	125	145	51	68	619	631	328	508	532	603
ENSMUST00000008537	Carhsp1	16;16;16;16	8658587;8663587;8664255;8672113	8661103;8663709;8664422;8672153	-;-;-;-	2849	159	338	540	154	139	154	69	81	547	518	232	373	436	534
ENSMUST00000008542	Elk3	10;10;10;10;10	93247414;93254689;93264880;93284769;93310752	93250108;93254811;93265680;93284977;93311135	-;-;-;-;-	4212	11	29	55	17	28	26	10	5	182	195	198	137	154	224
ENSMUST00000008573	Herpud2	9;9;9;9;9;9;9;9	25108130;25109440;25110411;25113821;25124872;25130536;25133195;25150820	25109005;25109554;25110734;25113943;25125023;25130649;25133272;25151781	-;-;-;-;-;-;-;-	2744	443	336	547	357	464	419	175	170	1470	1363	414	1152	1154	1587
ENSMUST00000008579	Rdh13	7;7;7;7;7;7;7	4425667;4430394;4431422;4434994;4442594;4444203;4445447	4427802;4430495;4431634;4435098;4442749;4444321;4445649	-;-;-;-;-;-;-	3034	230	179	281	199	158	191	62	70	1134	1131	248	848	853	1131
ENSMUST00000008582	Adam21	12;12	81558584;81568092	81561111;81568474	-;-	2911	1	3	7	0	1	0	0	2	9	13	2	14	6	14
ENSMUST00000008594	Nutf2	8;8;8;8;8	105860634;105875534;105876354;105876510;105878805	105860705;105875658;105876425;105876608;105880402	+;+;+;+;+	1966	394	328	444	336	377	324	166	149	1149	1001	426	841	947	1104
ENSMUST00000008605	Fut1	7;7	45617606;45618622	45617747;45621059	+;+	2580	94	132	161	80	109	89	51	77	334	369	244	351	276	310
ENSMUST00000008626	Rnf151	17;17;17;17	24715839;24717066;24717463;24717983	24716709;24717162;24717608;24718057	-;-;-;-	1189	0	0	0	0	0	0	0	0	14	24	4	5	4	15
ENSMUST00000008633	Elavl2	4;4;4;4;4;4;4	91250763;91254141;91260761;91263992;91281214;91308611;91371900	91253570;91254179;91260986;91264145;91281317;91308854;91372054	-;-;-;-;-;-;-	3730	0	0	0	0	0	0	0	0	0	0	0	0	0	0
ENSMUST00000008684	Mgst1	6;6;6;6	138140316;138147659;138150768;138156132	138140606;138147815;138150862;138156755	+;+;+;+	1167	0	0	1	0	0	0	0	0	6	3	0	1	4	6
ENSMUST00000008733	Dnajb6	5;5;5;5;5;5;5;5;5;5	29735688;29748345;29750938;29752397;29753542;29764399;29765506;29766325;29781130;29785031	29736116;29748435;29751047;29752459;29753652;29764530;29765647;29766395;29781450;29786478	+;+;+;+;+;+;+;+;+;+	2918	74	65	93	69	81	78	40	25	288	308	148	261	273	290
ENSMUST00000008734	Htr3b	9;9;9;9;9;9;9;9;9	48935008;48936754;48937049;48945493;48946415;48947222;48947591;48959201;48964746	48936135;48936936;48937259;48945650;48946584;48947331;48947635;48959361;48964990	-;-;-;-;-;-;-;-;-	2411	1	3	2	1	1	0	0	0	4	6	3	4	10	9
ENSMUST00000008745	Rab25	3;3;3;3;3	88542029;88542701;88543320;88545061;88548033	88542370;88542781;88543513;88545256;88548300	-;-;-;-;-	1081	92	105	113	77	103	90	48	47	214	176	29	144	160	204
ENSMUST00000008748	Ubqln4	3;3;3;3;3;3;3;3;3;3;3	88553716;88555338;88555790;88556657;88559618;88563108;88564370;88565007;88565213;88565691;88568081	88553912;88555489;88555992;88556919;88559776;88563333;88564509;88565090;88565328;88565877;88569725	+;+;+;+;+;+;+;+;+;+;+	3372	1400	1156	1379	1055	1324	1272	389	345	2302	2033	789	1768	1843	2303
ENSMUST00000008801	Cyp4f15	17;17;17;17;17;17;17;17;17;17;17;17;17	32685679;32686059;32690644;32692416;32692558;32695274;32697773;32699931;32700205;32701904;32702126;32702332;32702789	32685811;32686257;32690788;32692469;32692685;32695395;32698043;32699997;32700334;32702037;32702190;32702414;32703352	+;+;+;+;+;+;+;+;+;+;+;+;+	2095	0	0	0	0	0	0	0	0	0	0	0	0	0	0
ENSMUST00000008812	Rps18	17;17;17;17;17	33951999;33952221;33952403;33955078;33955618	33952118;33952312;33952591;33955176;33955717	-;-;-;-;-	600	0	0	0	0	0	0	0	0	0	0	0	0	0	0
ENSMUST00000008826	Rpl10	X;X;X;X;X;X;X	74270812;74270979;74271660;74271800;74272179;74272672;74272915	74270874;74271024;74271718;74271907;74272317;74272834;74273135	+;+;+;+;+;+;+	799	0	0	1	0	0	0	0	0	1	0	0	0	0	0
ENSMUST00000008830	Zfp955a	17;17;17;17	33241519;33243713;33244008;33255020	33242950;33243770;33244134;33255040	-;-;-;-	1638	59	37	47	22	29	36	20	24	17	4	0	6	5	17
ENSMUST00000008847	Vav1	17;17;17;17;17;17	57311896;57314244;57315244;57318628;57324642;57327651	57311934;57314580;57315331;57318742;57324793;57327953	+;+;+;+;+;+	1034	0	0	1	0	0	0	0	0	0	0	0	0	0	0
ENSMUST00000008878	Gprc5b	7;7;7;7	118972040;118976513;118983615;118995040	118975203;118976670;118984645;118995211	-;-;-;-	4525	10	42	45	9	21	26	5	11	144	187	15	153	131	183
ENSMUST00000008893	Coro1b	19;19;19;19;19;19;19;19;19;19;19	4148619;4149342;4149863;4150090;4150440;4150707;4151395;4151580;4152522;4153227;4153597	4148736;4149544;4149985;4150219;4150621;4150826;4151499;4151725;4152579;4153490;4154035	+;+;+;+;+;+;+;+;+;+;+	1888	170	166	217	146	160	168	99	94	466	426	164	427	451	433
ENSMUST00000008907	Man1a2	3;3;3;3;3;3;3;3;3;3;3;3;3	100562208;100578476;100581985;100587718;100591833;100616963;100620029;100632504;100644541;100646992;100652539;100656019;100684561	100567742;100578591;100582157;100587937;100591948;100617056;100620152;100632598;100644621;100647110;100652635;100656274;100685503	-;-;-;-;-;-;-;-;-;-;-;-;-	7969	293	295	376	212	294	233	136	104	1731	1794	738	1467	1449	2010
ENSMUST00000008957	Tppp2	14;14;14;14	51918425;51918715;51919341;51920427	51918492;51918960;51919494;51920699	+;+;+;+	741	0	0	0	0	0	0	0	0	0	0	0	0	0	0
ENSMUST00000008966	Acyp1	12;12;12	85272398;85279991;85280310	85272827;85280082;85280435	-;-;-	648	0	0	0	0	0	0	0	0	2	5	0	4	3	5
ENSMUST00000008987	Cldn13	5;5	134914249;134914702	134914490;134915526	-;-	1067	4	1	24	3	1	1	2	0	18	18	10	10	11	4
ENSMUST00000008991	Sptbn2	19;19;19;19;19;19;19;19;19;19;19;19;19;19;19;19;19;19;19;19;19;19;19;19;19;19;19;19;19;19;19;19;19;19;19;19;19	4711208;4718819;4724080;4724630;4725901;4726140;4726582;4729062;4729302;4731274;4731926;4732388;4733654;4734039;4737342;4737811;4739107;4739591;4739853;4742333;4744048;4744466;4745109;4745458;4745780;4746566;4747712;4748059;4748594;4748938;4749402;4749634;4749783;4750021;4750481;4751149;4751501	4711644;4718997;4724231;4724803;4725992;4726220;4726697;4729174;4729489;4731391;4732084;4732690;4733807;4734909;4737479;4738567;4739309;4739681;4739999;4742596;4744272;4744555;4745369;4745588;4745984;4746940;4747956;4748197;4748678;4749134;4749544;4749709;4749833;4750241;4750654;4751191;4752353	+;+;+;+;+;+;+;+;+;+;+;+;+;+;+;+;+;+;+;+;+;+;+;+;+;+;+;+;+;+;+;+;+;+;+;+;+	8251	72	259	327	102	107	112	30	53	153	165	193	248	127	168
ENSMUST00000008995	Hdac4	1;1;1;1;1;1;1;1;1;1;1;1;1;1;1;1;1;1;1;1;1;1;1;1;1;1	91932757;91933656;91934602;91945900;91947418;91955290;91956042;91958355;91959411;91961453;91964780;91968353;91970943;91972700;91975439;91982029;91984378;91984661;91987545;91991483;91996057;92002155;92012669;92029955;92054901;92148256	91933386;91933797;91934686;91946033;91947536;91955387;91956161;91958442;91959466;91961560;91964826;91968458;91971076;91972886;91975693;91982252;91984573;91984777;91987657;91991614;91996178;92002275;92012819;92030196;92054972;92148393	-;-;-;-;-;-;-;-;-;-;-;-;-;-;-;-;-;-;-;-;-;-;-;-;-;-	3937	0	0	0	0	0	0	0	0	0	0	0	0	0	0
ENSMUST00000008999	Hdac5	11;11;11;11;11;11;11;11;11;11;11;11;11;11;11;11;11;11;11;11;11;11;11;11;11;11;11;11;11	102195744;102195948;102196238;102196539;102197059;102197339;102197666;102198797;102199005;102199366;102199636;102199969;102200400;102201233;102202053;102202544;102204431;102204832;102205284;102205485;102205790;102206422;102206630;102206907;102218416;102219145;102221768;102224734;102230005	102195868;102196117;102196322;102196672;102197177;102197436;102197785;102198884;102199060;102199473;102199685;102200089;102200533;102201404;102202334;102202755;102204653;102204963;102205396;102205631;102205920;102206536;102206774;102207166;102218781;102219281;102221851;102224955;102230124	-;-;-;-;-;-;-;-;-;-;-;-;-;-;-;-;-;-;-;-;-;-;-;-;-;-;-;-;-	4269	13	7	5	6	6	3	0	1	0	0	1	0	0	0
ENSMUST00000009003	Rala	13;13;13;13;13	17880575;17888507;17893122;17896953;17944017	17882501;17888681;17893330;17897102;17944239	-;-;-;-;-	2684	634	533	762	474	577	557	258	311	1900	1797	693	1504	1538	2046
ENSMUST00000009018	Clec3a	8;8;8	114418086;114422920;114425455	114418200;114423003;114425846	+;+;+	591	0	0	5	0	0	0	0	0	0	0	1	0	0	0
ENSMUST00000009036	Vdac3	8;8;8;8;8;8;8;8;8	22577075;22578043;22578992;22580340;22582083;22583584;22587553;22588726;22593684	22577602;22578100;22579142;22580567;22582135;22583736;22587602;22588794;22593813	-;-;-;-;-;-;-;-;-	1420	0	0	0	0	0	0	0	0	0	0	0	0	0	0
ENSMUST00000009039	Rpl30	15;15;15;15	34440510;34441232;34442635;34443025	34440604;34441362;34442780;34443222	-;-;-;-	570	0	0	0	0	0	0	0	0	0	0	0	0	0	0
ENSMUST00000009058	Abcb1b	5;5;5;5;5;5;5;5;5;5;5;5;5;5;5;5;5;5;5;5;5;5;5;5;5;5;5;5	8798147;8798736;8805433;8806008;8810558;8812655;8813574;8814723;8821272;8823932;8824187;8824473;8824689;8825113;8825551;8827326;8827703;8828823;8832194;8835028;8837591;8845748;8849512;8851457;8853429;8861424;8864115;8865750	8798289;8798806;8805481;8806170;8810615;8812846;8813745;8814847;8821443;8824045;8824297;8824598;8824892;8825283;8825712;8827499;8827849;8828930;8832271;8835111;8837794;8845848;8849652;8851613;8853626;8861630;8864261;8866314	+;+;+;+;+;+;+;+;+;+;+;+;+;+;+;+;+;+;+;+;+;+;+;+;+;+;+;+	4344	0	3	10	0	2	0	3	0	7	7	3	9	6	9
ENSMUST00000009099	Mta1	12;12;12;12;12;12;12;12;12;12;12;12;12;12;12;12;12;12;12;12;12	113098278;113112146;113116988;113120211;113120827;113121023;113123117;113126780;113127615;113128032;113130120;113130534;113130885;113131316;113131573;113131888;113133185;113133541;113135797;113136281;113136518	113098445;113112213;113117081;113120261;113120953;113121086;113123239;113126877;113127714;113128220;113130194;113130592;113131000;113131467;113131762;113131977;113133337;113133576;113135828;113136432;113137206	+;+;+;+;+;+;+;+;+;+;+;+;+;+;+;+;+;+;+;+;+	2826	0	0	0	0	0	0	0	0	0	0	0	0	0	0
ENSMUST00000009102	Vps72	3;3;3;3;3;3	95111022;95118225;95118649;95119131;95121262;95122379	95111214;95118377;95118763;95119307;95121406;95123051	+;+;+;+;+;+	1456	42	44	54	33	43	42	21	24	209	211	129	189	202	184
ENSMUST00000009120	Gabpa	16;16;16;16;16;16;16;16;16;16	84835124;84839081;84841329;84844282;84846124;84852460;84856462;84857034;84857380;84860375	84835543;84839183;84841473;84844366;84846369;84852654;84856515;84857174;84857572;84863779	+;+;+;+;+;+;+;+;+;+	4987	152	142	218	95	156	123	64	68	974	978	334	925	822	1074
ENSMUST00000009138	Stk38	17;17;17;17;17;17;17;17;17;17;17;17;17;17	28970885;28973045;28974282;28974546;28975819;28977540;28979203;28982032;28984077;28988178;28991298;28992417;29000009;29007711	28972676;28973139;28974377;28974669;28975936;28977601;28979305;28982186;28984200;28988261;28991420;28992468;29000141;29007937	-;-;-;-;-;-;-;-;-;-;-;-;-;-	3288	83	97	86	57	76	88	41	22	360	364	105	364	283	401
ENSMUST00000009143	Bmp7	2;2;2;2;2;2;2	172868012;172872872;172875215;172879326;172893448;172916467;172939655	172870286;172872982;172875291;172879523;172893596;172916659;172940321	-;-;-;-;-;-;-	3670	13	87	76	17	26	29	13	7	240	337	171	174	190	180
ENSMUST00000009157	Dynll1	5;5;5	115297110;115300513;115300832	115298833;115300650;115300999	-;-;-	2030	101	119	154	79	88	97	31	61	738	708	459	442	596	515
ENSMUST00000009174	Pdcl	2;2;2;2	37350074;37355636;37357204;37359143	37352382;37355817;37357380;37359332	-;-;-;-	2858	25	24	35	18	35	20	27	29	555	544	319	504	557	543
ENSMUST00000009191	Gm5965	16;16	88777896;88778202	88778156;88778528	+;+	588	0	0	0	0	0	0	0	0	0	0	0	0	0	0
ENSMUST00000009214	Rsph14	10;10;10;10;10;10;10	74957477;74959568;74961507;75025046;75029703;75031114;75032524	74957783;74959704;74961732;75025164;75029805;75031358;75032565	-;-;-;-;-;-;-	1179	0	0	0	0	0	0	0	0	0	0	0	0	0	0
ENSMUST00000009219	Cabp7	11;11;11;11;11	4736892;4739124;4739554;4740369;4746619	4738948;4739277;4739666;4740512;4746778	-;-;-;-;-	2628	0	2	2	4	2	0	0	0	2	2	2	8	4	3
ENSMUST00000009220	Zmat5	11;11;11;11;11;11	4704678;4722358;4728585;4730187;4732067;4737332	4704721;4722511;4728647;4730267;4732178;4737669	+;+;+;+;+;+	792	0	0	0	0	0	0	0	0	9	9	5	18	11	15
ENSMUST00000009234	Ap1b1	11;11;11;11;11;11;11;11;11;11;11;11;11;11;11;11;11;11;11;11;11	4986824;5009530;5012882;5015606;5016606;5018016;5019281;5023097;5024372;5025594;5026245;5030962;5031630;5032418;5033687;5037632;5039125;5039519;5040094;5040267;5041718	4987051;5009592;5012987;5015741;5016851;5018206;5019502;5023217;5024467;5025709;5026410;5031060;5031889;5032619;5033842;5037777;5039254;5039603;5040180;5040421;5042791	+;+;+;+;+;+;+;+;+;+;+;+;+;+;+;+;+;+;+;+;+	4085	1	1	0	0	0	2	0	0	3	0	0	1	0	7
ENSMUST00000009236	Derl3	10;10;10;10;10;10;10	75893398;75893619;75893770;75893967;75894432;75895039;75895247	75893517;75893684;75893843;75894060;75894627;75895129;75895941	+;+;+;+;+;+;+	1336	10	10	19	8	13	13	4	8	74	111	95	59	58	56
ENSMUST00000009241	Tbx1	16;16;16;16;16;16;16	18581713;18582724;18582907;18583419;18584084;18585035;18586536	18582456;18582824;18582974;18583574;18584255;18585136;18586969	-;-;-;-;-;-;-	1777	0	8	4	4	2	0	0	0	15	22	18	34	17	32
ENSMUST00000009256	Bcl2l13	6;6;6;6;6;6;6	120836230;120848456;120862855;120865568;120870766;120876203;120886678	120836357;120848616;120862962;120865724;120870835;120876346;120892842	+;+;+;+;+;+;+	6933	381	368	527	297	404	372	154	129	779	715	115	577	570	788
ENSMUST00000009259	Spatc1l	10;10;10;10	76562272;76563848;76569336;76569666	76562567;76564195;76569487;76570201	+;+;+;+	1332	0	0	0	0	1	1	0	0	1	0	1	1	1	0
ENSMUST00000009321	Dgcr8	16;16;16;16;16;16;16;16;16;16;16;16;16;16	18253948;18256672;18258194;18259549;18259879;18272721;18277166;18278039;18278319;18280220;18280614;18283124;18283697;18289103	18255605;18256785;18258321;18259655;18259979;18272803;18277264;18278140;18278516;18280502;18280756;18283283;18284696;18289246	-;-;-;-;-;-;-;-;-;-;-;-;-;-	4320	0	0	0	0	0	0	0	0	0	0	0	0	0	0
ENSMUST00000009329	Ccl8	11;11;11	82115185;82116039;82116529	82115312;82116150;82116799	+;+;+	511	3	5	10	0	3	2	3	8	1	9	5	5	9	4
ENSMUST00000009340	Ifi211	1;1;1;1;1;1;1	173896355;173899344;173901620;173905473;173906132;173907597;173912814	173896643;173899532;173902042;173905631;173906328;173907881;173912922	-;-;-;-;-;-;-	1651	3	5	10	1	0	1	0	0	0	2	0	0	1	0
ENSMUST00000009344	Xpo6	7;7;7;7;7;7;7;7;7;7;7;7;7;7;7;7;7;7;7;7;7;7;7;7	126101716;126104704;126105101;126107071;126108452;126108786;126109914;126112752;126113657;126115808;126120357;126124372;126128227;126129548;126131026;126140565;126149234;126152826;126156724;126160861;126169129;126171030;126174158;126199899	126102390;126104934;126105199;126107232;126108623;126108900;126110069;126112941;126113803;126115952;126120449;126124531;126128296;126129637;126131134;126140674;126149360;126153279;126156801;126161020;126169326;126171142;126174248;126200408	-;-;-;-;-;-;-;-;-;-;-;-;-;-;-;-;-;-;-;-;-;-;-;-	4455	0	0	0	0	0	0	0	0	0	0	0	0	0	0
ENSMUST00000009354	Prr29	11;11;11;11;11;11;11	106365472;106366779;106374297;106375409;106376254;106376627;106376893	106365650;106366946;106374440;106375515;106376474;106376697;106377114	+;+;+;+;+;+;+	1112	0	0	0	1	0	0	0	0	0	0	0	0	0	0
ENSMUST00000009356	Serpinb2	1;1;1;1;1;1;1;1	107511423;107515464;107519652;107522147;107522692;107523065;107523797;107524537	107511478;107515640;107519771;107522275;107522809;107523207;107523961;107525598	+;+;+;+;+;+;+;+	1970	0	0	0	0	0	0	0	0	0	0	0	0	0	0
ENSMUST00000009358	Mymk	2;2;2;2;2	27061636;27062702;27066291;27067353;27071881	27062337;27062818;27066439;27067467;27072179	-;-;-;-;-	1382	0	0	0	0	0	0	0	0	0	0	0	0	0	0
ENSMUST00000009390	Trpm5	7;7;7;7;7;7;7;7;7;7;7;7;7;7;7;7;7;7;7;7;7;7;7;7;7	143071789;143072731;143073162;143073969;143074422;143075493;143078292;143079101;143079396;143080116;143080716;143080959;143081747;143082285;143082517;143082723;143083418;143084756;143085118;143085456;143086856;143087701;143088911;143089492;143094566	143072436;143072797;143073234;143074101;143074603;143075646;143078466;143079233;143079514;143080374;143080808;143081071;143081892;143082408;143082657;143083061;143083536;143084858;143085309;143085520;143087042;143087873;143089091;143089618;143094642	-;-;-;-;-;-;-;-;-;-;-;-;-;-;-;-;-;-;-;-;-;-;-;-;-	4123	0	0	0	0	0	0	0	0	0	0	0	0	0	0
ENSMUST00000009392	Ascl2	7;7;7	142966822;142967900;142968971	142967339;142968699;142969264	-;-;-	1612	0	0	0	0	0	0	0	0	0	0	0	0	0	0
ENSMUST00000009396	Tspan32	7;7;7;7;7;7;7;7;7	143005046;143005904;143006908;143011034;143014959;143015581;143017201;143017579;143018691	143005175;143006018;143007005;143011108;143015060;143015667;143017284;143017673;143019486	+;+;+;+;+;+;+;+;+	1582	0	0	0	0	0	0	0	0	0	0	0	0	0	0
ENSMUST00000009411	Zfp212	6;6;6;6;6	47920476;47926507;47927020;47929050;47930711	47920749;47926896;47927146;47929130;47932639	+;+;+;+;+	2801	199	145	256	141	158	175	55	72	692	775	497	639	730	896
ENSMUST00000009420	Repin1	6;6;6	48593900;48594862;48596293	48594052;48594976;48599081	+;+;+	3057	0	0	0	0	0	0	0	0	0	0	0	0	0	0
ENSMUST00000009425	Rarres2	6;6;6;6;6;6	48569698;48569941;48570244;48571783;48572088;48572594	48569805;48570059;48570339;48571887;48572290;48572670	-;-;-;-;-;-	708	9	13	16	3	16	9	6	0	35	34	0	22	26	34
ENSMUST00000009435	Pttg1ip	10;10;10;10;10;10	77581720;77587251;77589634;77592846;77593864;77597028	77581927;77587303;77589742;77593017;77593910;77598732	+;+;+;+;+;+	2294	495	460	662	451	555	514	276	242	1588	1590	460	1396	1367	1673
ENSMUST00000009522	Slc16a12	19;19;19;19;19;19;19	34668403;34672436;34674807;34677284;34680288;34690644;34747066	34670893;34672695;34675386;34677427;34680391;34690891;34747289	-;-;-;-;-;-;-	4051	0	4	5	0	0	0	0	0	21	26	13	16	18	25
ENSMUST00000009530	Timp1	X;X;X;X;X;X	20870221;20871031;20872777;20873050;20873368;20874471	20870324;20871162;20872856;20873176;20873492;20874735	+;+;+;+;+;+	833	0	0	0	0	0	0	0	0	0	0	0	0	0	0
ENSMUST00000009538	Syn2	6;6;6;6;6;6;6;6;6;6;6;6;6	115134902;115236014;115237255;115239359;115244146;115254163;115254590;115261655;115262522;115263832;115274196;115278101;115281088	115135460;115236071;115237346;115239515;115244235;115254225;115254732;115261729;115262624;115263981;115274256;115278353;115282626	+;+;+;+;+;+;+;+;+;+;+;+;+	3343	632	455	593	398	650	589	209	179	1655	1540	399	1348	1401	1848
ENSMUST00000009550	Elk1	X;X;X;X;X;X	20933395;20935631;20936232;20937117;20941554;20950440	20935548;20935732;20936663;20937563;20941797;20950608	-;-;-;-;-;-	3548	108	133	212	141	141	111	55	32	180	211	225	156	205	405
ENSMUST00000009617	Kcnc4	3;3;3;3	107438303;107445430;107447504;107458201	107439476;107445633;107448440;107458898	-;-;-;-	3013	3889	3148	3666	3119	3800	3542	1914	1582	3194	2821	1110	2640	2443	3307
ENSMUST00000009667	Ush1c	7;7;7;7;7;7;7;7;7;7;7;7;7;7;7;7;7;7;7;7;7;7;7;7;7;7;7	46195357;46196712;46197196;46198353;46200974;46201369;46201633;46204130;46205194;46208850;46209864;46211159;46214931;46219299;46220449;46221393;46221641;46221849;46222818;46224838;46225184;46225410;46225543;46229203;46229454;46230064;46238429	46195734;46196820;46197251;46198462;46201073;46201422;46201674;46204180;46205313;46209332;46209980;46211311;46214980;46219423;46220514;46221535;46221697;46221908;46222902;46224932;46225241;46225434;46225651;46229341;46229597;46230131;46238503	-;-;-;-;-;-;-;-;-;-;-;-;-;-;-;-;-;-;-;-;-;-;-;-;-;-;-	3072	0	0	0	0	0	0	0	0	0	0	0	0	0	0
ENSMUST00000009679	Rnmt	18;18;18;18;18;18;18;18;18;18;18	68300355;68305780;68307646;68309321;68311608;68313665;68313988;68317994;68319118;68320226;68321318	68300425;68306199;68307787;68309446;68311720;68313846;68314152;68318111;68319219;68320259;68324852	+;+;+;+;+;+;+;+;+;+;+	5008	1	1	1	0	1	0	0	3	8	11	0	11	17	14
ENSMUST00000009689	Kcnq1	7;7;7;7;7;7;7;7;7;7;7;7;7;7;7;7	143107254;143149498;143182730;143183097;143183627;143184402;143191420;143192576;143194222;143195263;143261256;143358710;143362592;143363230;143363633;143425910	143107741;143149588;143182856;143183175;143183723;143184542;143191530;143192671;143194344;143195404;143261376;143358785;143362686;143363276;143363694;143427042	+;+;+;+;+;+;+;+;+;+;+;+;+;+;+;+	3029	254	182	275	151	168	188	64	63	862	743	160	524	546	735
ENSMUST00000009693	Srp14	2;2;2;2;2	118475850;118476827;118478921;118479378;118479591	118476307;118476859;118479033;118479450;118479711	-;-;-;-;-	798	0	0	0	0	0	0	0	0	1	0	0	0	1	1
ENSMUST00000009695	6330409D20Rik	2;2;2	32732620;32737500;32740450	32733039;32737631;32741016	-;-;-	1119	36	40	52	20	24	33	4	11	100	74	4	47	59	61
ENSMUST00000009699	Cdk9	2;2;2;2;2;2;2	32707438;32709467;32709773;32710043;32710477;32712031;32712565	32708289;32709615;32709944;32710209;32710567;32712112;32712784	-;-;-;-;-;-;-	1733	0	0	0	0	0	0	0	0	0	0	0	0	0	0
ENSMUST00000009705	Eng	2;2;2;2;2;2;2;2;2;2;2;2;2;2;2	32646595;32657516;32669423;32671342;32672218;32672837;32673250;32673592;32677553;32677923;32678456;32678891;32680281;32681196;32681437	32647024;32657670;32669563;32671507;32672383;32672957;32673424;32673734;32677690;32677961;32678572;32679142;32680335;32681297;32682658	+;+;+;+;+;+;+;+;+;+;+;+;+;+;+	3422	0	0	0	0	0	0	0	0	0	0	0	0	0	0
ENSMUST00000009707	Tor2a	2;2;2;2;2	32757234;32758671;32759527;32760589;32761496	32757450;32758936;32759702;32760716;32762244	+;+;+;+;+	1536	0	0	0	0	0	0	0	0	0	0	0	0	0	0
ENSMUST00000009713	Mrtfb	16;16;16;16;16;16;16;16;16;16;16;16;16;16;16;16;16	13256481;13265079;13326382;13378264;13379840;13381528;13384194;13385606;13394823;13398224;13400080;13400653;13403155;13405249;13405765;13409617;13412160	13256554;13265139;13326571;13378329;13379895;13381603;13384355;13385784;13394960;13398486;13400179;13401684;13403310;13405407;13405902;13409677;13415063	+;+;+;+;+;+;+;+;+;+;+;+;+;+;+;+;+	5815	0	0	0	0	0	0	0	0	0	0	0	0	0	0
ENSMUST00000009727	Syngr1	15;15;15;15	80091344;80110444;80111599;80115855	80091492;80110681;80111744;80119501	+;+;+;+	4180	2505	2156	2803	2116	2602	2448	1190	1010	3192	2467	622	2320	2088	3545
ENSMUST00000009728	Syngr1	15;15;15;15	80091334;80110444;80111599;80113166	80091492;80110681;80111744;80113441	+;+;+;+	819	6	4	11	5	5	2	4	0	36	34	12	16	36	19
ENSMUST00000009732	St6galnac1	11;11;11;11;11;11;11;11;11	116765025;116766073;116766259;116766538;116766978;116767681;116767945;116768871;116775287	116765922;116766172;116766348;116766641;116767116;116767852;116768113;116769369;116775507	-;-;-;-;-;-;-;-;-	2392	0	0	0	0	0	0	0	0	2	1	0	0	1	0
ENSMUST00000009740	Taf7l	X;X;X;X;X;X;X;X;X;X;X;X;X	134460118;134464300;134465622;134465908;134466524;134467076;134467898;134470116;134470380;134471392;134472031;134472906;134476191	134460665;134464359;134465734;134466141;134466625;134467148;134467939;134470171;134470509;134471525;134472109;134472967;134476490	-;-;-;-;-;-;-;-;-;-;-;-;-	1933	0	0	0	0	0	0	0	0	0	0	0	0	0	0
ENSMUST00000009772	Tex15	8;8;8;8	33570544;33578951;33581512;33585498	33577578;33579000;33582746;33585582	+;+;+;+	8405	23	98	135	10	19	32	27	38	4	1	7	7	4	11
ENSMUST00000009774	Ppp2cb	8;8;8;8;8;8;8	33599621;33610655;33611748;33615450;33615666;33617027;33619122	33600018;33610864;33611921;33615539;33615827;33617145;33619794	+;+;+;+;+;+;+	1826	644	650	849	521	617	591	290	353	1546	1548	483	1470	1418	1659
ENSMUST00000009777	G0s2	1;1	193272161;193272989	193272802;193273188	-;-	842	3	27	59	0	8	14	1	3	85	93	88	59	81	82
ENSMUST00000009789	P4ha1	10;10;10;10;10;10;10;10;10;10;10;10;10;10;10	59323296;59337054;59339296;59342684;59343657;59348181;59350404;59352083;59354340;59361861;59365289;59367289;59369241;59369587;59371004	59323476;59337156;59339392;59342835;59343794;59348420;59350600;59352259;59354410;59361960;59365342;59367354;59369309;59369683;59373304	+;+;+;+;+;+;+;+;+;+;+;+;+;+;+	4043	15	17	25	16	15	15	6	3	173	188	161	99	137	213
ENSMUST00000009790	Pla2g12b	10;10;10;10	59403660;59410977;59416348;59421463	59403981;59411065;59416513;59421976	+;+;+;+	1091	0	0	0	0	0	0	0	0	0	0	0	0	0	0
ENSMUST00000009791	Mcu	10;10;10;10;10	59448597;59451206;59454946;59456649;59457826	59448858;59451322;59455149;59456809;59458160	-;-;-;-;-	1079	1	4	5	2	1	1	0	0	1	4	0	0	6	5
ENSMUST00000009798	Oit3	10;10;10;10;10;10;10;10;10	59422958;59425377;59427944;59429491;59430893;59435867;59437710;59438541;59441623	59424112;59425476;59428359;59429651;59431015;59435989;59437817;59438915;59441778	-;-;-;-;-;-;-;-;-	2717	1	1	1	0	2	1	0	0	1	1	1	1	1	1
ENSMUST00000009814	Tex11	X;X;X;X;X;X;X;X;X;X;X;X;X;X;X;X;X;X;X;X;X;X;X;X;X;X;X;X;X;X	100838648;100839701;100849049;100850269;100851826;100876536;100879977;100882244;100882923;100884362;100903758;100906119;100916526;100933388;100946656;100951565;100954700;100972094;100975180;100977624;100985693;101007703;101015544;101032498;101032701;101039047;101043441;101050459;101059356;101059513	100839060;100839865;100849169;100850377;100851975;100876608;100880093;100882314;100883009;100884402;100903814;100906204;100916650;100933490;100946793;100951650;100954851;100972172;100975261;100977719;100985747;101007788;101015624;101032617;101032781;101039126;101043525;101050580;101059417;101059639	-;-;-;-;-;-;-;-;-;-;-;-;-;-;-;-;-;-;-;-;-;-;-;-;-;-;-;-;-;-	3250	0	0	0	0	0	0	0	0	0	0	0	0	0	0
ENSMUST00000009831	Fxyd5	7;7;7;7;7;7;7;7;7	31032733;31035209;31035386;31036436;31037821;31039038;31040183;31041397;31042090	31033018;31035283;31035415;31036516;31037931;31039094;31040257;31041457;31042146	-;-;-;-;-;-;-;-;-	833	0	0	0	0	0	0	0	0	0	0	0	0	0	0
ENSMUST00000009875	Kcnd1	X;X;X;X;X;X	7822289;7831172;7831432;7831602;7832093;7836266	7824963;7831334;7831515;7831700;7832343;7838280	+;+;+;+;+;+	5287	17	19	24	19	26	27	8	3	98	99	182	100	118	113
ENSMUST00000009877	Tfcp2	15;15;15;15;15;15;15;15;15;15;15;15;15;15;15;15	100502799;100506206;100511695;100512209;100513081;100514029;100514804;100517950;100518570;100520563;100522389;100525567;100527877;100528395;100551325;100551910	100504443;100506257;100511837;100512333;100513171;100514122;100514852;100518038;100518680;100520715;100522495;100525672;100527953;100528546;100551481;100552008	-;-;-;-;-;-;-;-;-;-;-;-;-;-;-;-	3250	307	312	422	257	301	314	99	109	779	652	377	576	564	792
ENSMUST00000009885	Ubp1	9;9;9;9;9;9;9;9;9;9;9;9;9;9;9;9	113930934;113931529;113944848;113951608;113955963;113956707;113958598;113958829;113964552;113966235;113966492;113969326;113970142;113972751;113973519;113975346	113931219;113931766;113944999;113951684;113956068;113956813;113958750;113958939;113964655;113966289;113966585;113969416;113970260;113972893;113973570;113977199	+;+;+;+;+;+;+;+;+;+;+;+;+;+;+;+	3742	0	0	0	0	0	0	0	0	0	0	0	0	0	0
ENSMUST00000009972	Ick	9;9	78113284;78124956	78113455;78125656	+;+	873	68	47	51	39	44	70	20	16	337	290	302	267	374	253
ENSMUST00000010007	Sdhb	4;4;4;4;4;4;4;4	140961203;140966495;140971137;140972883;140973664;140976115;140977378;140979025	140961476;140966628;140971222;140973019;140973780;140976216;140977500;140979193	+;+;+;+;+;+;+;+	1142	186	193	225	152	193	190	102	145	376	377	276	371	382	364
ENSMUST00000010020	Cox4i2	2;2;2;2;2	152754173;152755155;152757010;152760638;152764745	152754224;152755239;152757174;152760769;152765037	+;+;+;+;+	727	0	0	1	0	0	0	0	0	0	0	0	0	0	2
ENSMUST00000010038	Snap47	11;11;11;11;11	59407134;59421525;59428341;59437978;59449915	59407810;59421649;59428813;59438513;59449999	-;-;-;-;-	1896	351	303	397	270	344	413	177	171	806	676	75	665	626	896
ENSMUST00000010044	Wnt3a	11;11;11;11	59248033;59256280;59275140;59290577	59250109;59256545;59275381;59290752	-;-;-;-	2761	2	7	7	0	0	0	0	0	4	7	10	11	3	9
ENSMUST00000010049	Kdsr	1;1;1;1;1;1;1;1;1;1	106720459;106727629;106734547;106739331;106743669;106747488;106747771;106753212;106755444;106759544	106725021;106727730;106734630;106739414;106743860;106747583;106747836;106753268;106755533;106759727	-;-;-;-;-;-;-;-;-;-	5518	371	349	423	230	376	320	198	172	2157	2167	890	1767	1918	2069
ENSMUST00000010085	Nxf2	X;X;X;X;X;X;X;X;X;X;X;X;X;X;X;X;X;X;X;X;X;X	134944528;134944892;134949687;134950347;134950969;134951102;134951330;134951490;134951749;134951887;134952492;134955228;134955509;134955723;134955965;134956165;134956363;134956592;134957050;134957468;134961924;134964628	134944788;134944952;134949884;134950419;134951011;134951217;134951388;134951597;134951804;134952141;134952528;134955337;134955616;134955811;134956034;134956245;134956467;134956675;134957203;134957570;134962018;134964754	-;-;-;-;-;-;-;-;-;-;-;-;-;-;-;-;-;-;-;-;-;-	2393	0	0	0	0	0	0	0	0	0	0	0	0	0	0
ENSMUST00000010127	Tktl1	X;X;X;X;X;X;X;X;X;X;X;X;X	74177259;74181784;74191222;74193519;74193794;74196984;74197640;74200598;74202531;74204874;74205874;74206345;74207674	74177423;74181898;74191319;74193710;74193921;74197177;74197804;74200754;74202661;74204957;74205970;74206464;74208500	+;+;+;+;+;+;+;+;+;+;+;+;+	2473	0	0	1	0	0	0	0	0	2	0	0	0	0	0
ENSMUST00000010188	Zmynd10	9;9;9;9;9;9;9;9;9;9;9;9	107547310;107547800;107548670;107548880;107549028;107549280;107549466;107549875;107550284;107550498;107550740;107550961	107547548;107547908;107548786;107548933;107549165;107549368;107549566;107550047;107550409;107550619;107550865;107551319	+;+;+;+;+;+;+;+;+;+;+;+	1753	1202	950	1079	1005	1006	1003	415	432	1962	1658	199	1500	1478	1960
ENSMUST00000010189	Tmem115	9;9	107533945;107537865	107535329;107538656	+;+	2177	312	308	404	254	337	330	125	138	576	444	113	387	329	655
ENSMUST00000010191	Hyal2	9;9;9;9	107569117;107570104;107571492;107572058	107569233;107571070;107571581;107572776	+;+;+;+	1893	33	59	92	18	40	28	14	26	135	159	126	140	180	212
ENSMUST00000010192	Ifrd2	9;9;9;9;9;9;9;9;9;9;9;9	107587718;107589903;107590109;107590298;107590505;107590796;107590932;107591202;107591568;107592075;107592276;107592475	107587946;107590022;107590193;107590422;107590662;107590846;107591110;107591307;107591705;107592203;107592371;107593038	+;+;+;+;+;+;+;+;+;+;+;+	1980	52	91	139	68	72	64	27	27	281	301	180	247	249	390
ENSMUST00000010195	Hyal1	9;9;9;9	107576958;107577553;107578881;107579100	107577078;107578476;107578970;107580978	+;+;+;+	3014	0	0	0	0	0	0	0	0	0	0	0	0	1	1
ENSMUST00000010198	Tusc2	9;9;9	107563255;107564576;107564847	107563532;107564696;107566108	+;+;+	1661	745	653	798	607	726	688	304	324	1853	1809	879	1681	1752	1892
ENSMUST00000010201	Nprl2	9;9;9;9;9;9;9;9;9;9;9	107542209;107542982;107543168;107543507;107544151;107544380;107544598;107544747;107544914;107545245;107545491	107542453;107543073;107543336;107543615;107544287;107544477;107544634;107544840;107545031;107545387;107545704	+;+;+;+;+;+;+;+;+;+;+	1456	399	374	450	309	388	436	164	157	807	699	336	628	650	908
ENSMUST00000010205	Gnat1	9;9;9;9;9;9;9;9;9	107674477;107675887;107676196;107676543;107676893;107677129;107677374;107677631;107679443	107675583;107676078;107676349;107676672;107677021;107677286;107677515;107677673;107679592	-;-;-;-;-;-;-;-;-	2205	1	1	1	1	0	0	0	0	0	1	0	0	0	2
ENSMUST00000010208	Slc38a3	9;9;9;9;9;9;9;9;9;9;9;9;9;9;9;9	107651161;107652129;107655023;107655256;107655585;107655935;107656100;107656456;107656595;107657630;107657810;107657994;107658637;107658932;107659095;107667136	107652038;107652232;107655167;107655380;107655685;107656014;107656270;107656514;107656677;107657711;107657902;107658067;107658752;107659010;107659244;107667399	-;-;-;-;-;-;-;-;-;-;-;-;-;-;-;-	2604	0	0	0	0	0	0	0	0	0	0	0	0	0	0
ENSMUST00000010210	Cacna2d2	9;9;9;9;9;9;9;9;9;9;9;9;9;9;9;9;9;9;9;9;9;9;9;9;9;9;9;9;9;9;9;9;9;9;9;9;9;9	107399612;107426053;107465553;107497460;107505948;107509195;107512001;107512303;107513054;107513233;107513473;107513835;107514045;107514632;107514860;107515151;107515419;107517095;107517251;107517413;107517591;107518193;107522123;107524095;107524398;107524612;107524831;107525157;107525344;107525610;107525901;107526063;107526343;107526485;107526688;107526937;107527154;107527321	107400283;107426134;107465669;107497519;107505992;107509336;107512132;107512360;107513104;107513332;107513631;107513942;107514123;107514681;107514949;107515222;107515493;107517169;107517322;107517484;107517652;107518269;107522183;107524192;107524488;107524674;107524934;107525255;107525432;107525660;107525972;107526215;107526395;107526540;107526814;107527046;107527236;107529346	+;+;+;+;+;+;+;+;+;+;+;+;+;+;+;+;+;+;+;+;+;+;+;+;+;+;+;+;+;+;+;+;+;+;+;+;+;+	5786	0	0	0	0	0	0	0	0	0	0	0	0	0	0
ENSMUST00000010211	Rassf1	9;9;9;9;9	107554656;107557453;107557770;107558187;107561399	107554925;107557557;107558067;107558302;107562263	+;+;+;+;+	1654	23	30	21	22	25	35	5	11	71	41	0	33	30	77
ENSMUST00000010224	Epn3	11;11;11;11;11;11;11;11	94491113;94491571;94491909;94492166;94493773;94494934;94496002;94499693	94491479;94491804;94492019;94492435;94493904;94495011;94496681;94499909	-;-;-;-;-;-;-;-	2089	0	0	0	0	0	0	0	0	0	0	0	0	0	0
ENSMUST00000010239	Slc3a2	19;19;19;19;19;19;19;19;19	8706882;8708194;8709005;8709230;8709550;8709715;8711834;8712730;8713342	8708094;8708277;8709145;8709410;8709608;8709783;8711928;8712903;8713897	-;-;-;-;-;-;-;-;-	2572	29	17	29	18	26	24	16	11	38	19	0	15	11	45
ENSMUST00000010241	Nxf1	19;19;19;19;19;19;19;19;19;19;19;19;19;19;19;19;19;19;19;19;19	8757073;8762312;8762683;8763533;8763697;8763916;8764080;8764261;8764499;8764922;8766797;8767080;8767228;8767367;8767573;8767730;8767974;8768589;8769001;8770260;8770574	8757259;8762495;8762836;8763616;8763801;8763996;8764149;8764349;8764606;8765031;8766833;8767148;8767283;8767474;8767631;8767845;8768016;8768661;8769183;8770320;8770922	+;+;+;+;+;+;+;+;+;+;+;+;+;+;+;+;+;+;+;+;+	2326	0	0	0	0	0	0	0	0	0	0	0	0	0	0
ENSMUST00000010248	Tmem223	19;19	8770996;8772048	8771315;8772475	+;+	748	0	0	0	1	0	0	0	0	0	0	0	0	0	2
ENSMUST00000010249	Tmem179b	19;19;19;19;19	8772522;8773028;8773290;8773505;8774335	8772834;8773106;8773424;8773692;8774467	-;-;-;-;-	848	293	267	346	215	282	346	120	147	768	706	91	568	656	758
ENSMUST00000010250	Slc22a6	19;19;19;19;19;19;19;19;19;19	8617996;8619003;8619315;8621191;8621786;8622042;8623464;8623820;8625633;8626121	8618646;8619106;8619469;8621359;8621909;8622157;8623678;8623928;8625836;8628299	+;+;+;+;+;+;+;+;+;+	4026	0	0	0	1	0	1	0	0	3	0	1	2	1	2
ENSMUST00000010251	Slc22a8	19;19;19;19;19;19;19;19;19;19;19;19	8591254;8593213;8593883;8604790;8605394;8606025;8607850;8608158;8609128;8609661;8609903;8610193	8591456;8593292;8594239;8604893;8605548;8606193;8607973;8608273;8609342;8609769;8610106;8611834	+;+;+;+;+;+;+;+;+;+;+;+	3478	0	0	0	0	0	0	0	0	0	0	0	0	0	0
ENSMUST00000010254	Stx5a	19;19;19;19;19;19;19;19;19;19;19	8741489;8742254;8742854;8743080;8743353;8748461;8748655;8748807;8749666;8749906;8754877	8741575;8742497;8742924;8743135;8743423;8748577;8748711;8748888;8749772;8750027;8755642	+;+;+;+;+;+;+;+;+;+;+	1780	2	1	1	0	0	1	0	0	8	6	20	7	12	8
ENSMUST00000010267	Slc47a1	11;11;11;11;11;11;11;11;11;11;11;11;11;11;11;11;11	61343401;61348659;61349445;61352662;61353066;61359352;61359520;61362687;61362827;61363023;61363394;61367673;61369251;61370118;61371756;61373355;61377913	61344528;61348731;61349539;61352794;61353135;61359427;61359628;61362754;61362940;61363120;61363491;61367717;61369293;61370266;61371824;61373456;61378081	-;-;-;-;-;-;-;-;-;-;-;-;-;-;-;-;-	2639	0	0	0	0	0	0	0	0	0	0	0	0	0	0
ENSMUST00000010278	Wdr77	3;3;3;3;3;3;3;3;3;3	105959369;105959953;105961617;105962015;105964442;105964623;105965081;105965765;105966357;105967163	105959698;105960138;105961758;105962064;105964512;105964677;105965152;105965873;105966425;105969760	+;+;+;+;+;+;+;+;+;+	3682	0	0	0	0	0	0	0	0	0	1	0	1	0	0
ENSMUST00000010279	Tmigd3	3;3;3;3;3;3;3	105870907;105914170;105916757;105918726;105919975;105921920;105923922	105871011;105914271;105917098;105918792;105920075;105921987;105924036	+;+;+;+;+;+;+	900	0	0	1	0	0	0	0	0	0	0	0	2	0	0
ENSMUST00000010280	Pifo	3;3;3;3;3;3	105996957;105998272;105999528;106000372;106001098;106014428	105997199;105998389;105999658;106000470;106001243;106014646	-;-;-;-;-;-	956	0	0	0	0	0	0	0	0	0	0	1	0	1	0
ENSMUST00000010286	Tnfrsf13b	11;11;11;11;11	61126755;61140820;61141261;61146841;61147416	61126815;61140949;61141491;61147017;61149372	+;+;+;+;+	2556	3	23	26	0	2	3	0	2	32	37	43	42	38	25
ENSMUST00000010298	Spire2	8;8;8;8;8;8;8;8;8;8;8;8;8;8;8	123332713;123346640;123354019;123356523;123356714;123357643;123358110;123359342;123360073;123361250;123363019;123363323;123366836;123368678;123369172	123333020;123346683;123354375;123356600;123356878;123357729;123358233;123359511;123360262;123361365;123363153;123363390;123366863;123368793;123369515	+;+;+;+;+;+;+;+;+;+;+;+;+;+;+	2330	1002	870	1062	774	1002	920	381	368	1526	1135	30	930	893	1521
ENSMUST00000010319	Prox1	1;1;1;1;1	190122453;190146952;190153416;190160522;190169163	190123405;190147146;190153523;190162313;190169399	-;-;-;-;-	3285	0	1	1	0	0	0	0	0	0	0	0	0	1	0
ENSMUST00000010348	Fdx2	9;9;9;9;9	21067520;21068030;21073075;21073264;21073389	21067925;21068117;21073181;21073318;21073514	-;-;-;-;-	782	115	146	193	82	151	116	59	51	497	456	330	373	478	464
ENSMUST00000010421	2610507B11Rik	11;11;11;11;11;11;11;11;11;11;11;11;11;11;11;11;11;11;11;11;11;11;11;11;11;11;11;11;11;11;11;11;11;11;11;11;11;11;11	78261752;78262699;78263590;78263912;78264464;78265179;78265573;78266351;78266595;78266936;78267097;78268099;78268326;78268639;78269488;78271291;78272778;78273097;78273441;78273682;78274465;78274788;78275007;78277040;78279047;78279709;78283059;78284100;78284739;78285438;78285675;78286513;78287296;78287684;78287932;78288165;78288941;78289286;78289804	78261917;78262828;78263639;78264059;78264582;78265239;78265762;78266474;78266719;78267003;78267242;78268217;78268489;78268897;78269693;78272383;78272969;78273299;78273559;78273902;78274655;78274887;78275209;78277334;78279204;78279915;78283158;78284282;78284860;78285593;78285796;78286693;78287382;78287794;78288067;78288295;78289042;78289420;78290623	+;+;+;+;+;+;+;+;+;+;+;+;+;+;+;+;+;+;+;+;+;+;+;+;+;+;+;+;+;+;+;+;+;+;+;+;+;+;+	7443	936	883	1194	732	825	775	286	251	1272	1167	704	999	996	1245
ENSMUST00000010434	AI597479	1;1;1;1	43098710;43100715;43110998;43113186	43098862;43100881;43111373;43115947	+;+;+;+	3458	311	267	345	201	306	231	98	127	932	927	426	710	728	1129
ENSMUST00000010451	Tmem86a	7;7;7	47050640;47052850;47053413	47050801;47053114;47054776	+;+;+	1791	45	82	98	46	72	73	18	17	469	513	160	457	506	416
ENSMUST00000010502	Ifi35	11;11;11;11;11;11;11	101448407;101456566;101457190;101457416;101457620;101457891;101458201	101448622;101456664;101457337;101457522;101457806;101457997;101458698	+;+;+;+;+;+;+	1362	8	11	10	8	6	2	1	4	38	31	32	28	34	34
ENSMUST00000010506	Rdm1	11;11;11;11;11;11;11	101627942;101628273;101630238;101630820;101633802;101634788;101635748	101628064;101628452;101630360;101630979;101633900;101634873;101636100	+;+;+;+;+;+;+	1124	0	0	0	0	0	0	0	0	0	0	0	0	0	1
ENSMUST00000010520	Nedd8	14;14;14;14	55662267;55663415;55663812;55671795	55662625;55663497;55663859;55671906	-;-;-;-	602	10	3	8	7	12	8	4	5	53	47	25	40	47	58
ENSMUST00000010536	Gosr1	11;11;11;11;11;11;11;11;11	76726602;76734569;76737382;76748508;76750811;76754369;76754713;76761235;76763520	76730233;76734651;76737411;76748582;76750902;76754476;76754800;76761355;76763579	-;-;-;-;-;-;-;-;-	4289	733	542	735	473	795	716	342	293	2049	1751	555	1548	1509	2176
ENSMUST00000010550	Mrpl52	14;14;14;14;14	54426909;54427034;54427171;54428584;54429582	54426960;54427091;54427238;54428648;54429750	+;+;+;+;+	412	172	204	241	137	187	211	83	114	426	411	235	371	436	391
ENSMUST00000010579	Spaca7	8;8;8;8;8;8;8	12573049;12580944;12585637;12586435;12589205;12598944;12600570	12573199;12581000;12585744;12586539;12589276;12599042;12600738	+;+;+;+;+;+;+	761	0	0	1	0	0	0	0	0	0	0	0	0	0	0
ENSMUST00000010597	Kansl3	1;1;1;1;1;1;1;1;1;1;1;1;1;1;1;1;1;1;1;1;1	36335730;36343251;36343673;36344070;36344916;36345385;36345838;36348525;36348818;36349402;36351633;36351926;36353594;36353772;36354098;36354649;36358040;36358370;36365482;36367769;36369105	36337651;36343384;36343895;36344179;36345046;36345466;36346029;36348681;36349018;36349465;36351790;36352000;36353665;36353873;36354214;36354780;36358225;36358460;36365652;36368034;36369181	-;-;-;-;-;-;-;-;-;-;-;-;-;-;-;-;-;-;-;-;-	4663	0	0	0	0	0	0	0	0	0	0	0	0	0	0
ENSMUST00000010673	Gm266	12	111484611	111485823	-	1213	1	1	2	3	0	3	1	0	18	26	69	24	36	41
ENSMUST00000010682	Tsacc	3;3;3;3	88282760;88287098;88295391;88296763	88282984;88287217;88295450;88296838	-;-;-;-	481	0	1	0	0	0	0	0	0	0	0	0	0	0	0
ENSMUST00000010698	Mettl16	11;11;11;11;11;11;11;11;11;11;11	74770830;74773522;74784058;74787555;74792203;74795982;74802893;74803831;74805253;74816870;74817159	74770984;74773649;74784257;74787695;74792318;74796124;74803012;74803900;74805342;74817043;74817894	+;+;+;+;+;+;+;+;+;+;+	2073	0	0	1	0	0	0	0	0	3	0	0	1	0	2
ENSMUST00000010736	Dazl	17;17;17;17;17;17;17;17;17;17;17	50279394;50283128;50284238;50284996;50286251;50287528;50287755;50288111;50288614;50289092;50293407	50281311;50283226;50284351;50285046;50286322;50287667;50287818;50288162;50288705;50289238;50293599	-;-;-;-;-;-;-;-;-;-;-	2942	4	1	9	3	2	1	2	3	18	16	16	14	11	14
ENSMUST00000010745	Apol7a	15;15;15;15;15	77388957;77392755;77393407;77396230;77396407	77390015;77392859;77393533;77396317;77396458	-;-;-;-;-	1431	0	0	0	0	0	0	0	0	0	0	0	0	0	0
ENSMUST00000010753	Psen2	1;1;1;1;1;1;1;1;1;1;1	180227006;180228843;180229386;180229842;180233611;180234989;180235911;180238873;180240731;180245614;180245864	180227728;180228961;180229487;180229925;180233709;180235209;180235978;180239014;180240945;180245757;180245950	-;-;-;-;-;-;-;-;-;-;-	2004	0	0	0	0	0	0	1	0	0	0	0	0	0	0
ENSMUST00000010795	Acaa1b	9;9;9;9;9;9;9;9;9;9;9;9	119148023;119148734;119148962;119149271;119149600;119150824;119151816;119153670;119153926;119155745;119156591;119156824	119148413;119148879;119149017;119149450;119149790;119150904;119151914;119153712;119154005;119155802;119156684;119157093	-;-;-;-;-;-;-;-;-;-;-;-	1689	35	30	41	18	29	12	10	11	50	53	23	6	8	11
ENSMUST00000010804	Plcd1	9;9;9;9;9;9;9;9;9;9;9;9;9;9;9	119071527;119072023;119072250;119072475;119073456;119073763;119074165;119074410;119074636;119074873;119075764;119076084;119080922;119084590;119093358	119071887;119072172;119072382;119072653;119073572;119073922;119074323;119074559;119074780;119075074;119075995;119076213;119081150;119084754;119093496	-;-;-;-;-;-;-;-;-;-;-;-;-;-;-	2651	0	11	19	0	1	0	4	3	21	35	25	36	33	49
ENSMUST00000010807	Fads1	19;19;19;19;19;19;19;19;19;19;19;19	10182888;10184927;10185685;10186378;10186755;10191440;10192912;10193701;10193996;10194318;10194489;10194871	10183264;10185037;10185882;10186479;10186883;10191500;10192988;10193798;10194092;10194397;10194614;10196870	+;+;+;+;+;+;+;+;+;+;+;+	3456	353	498	653	288	396	407	159	140	1213	960	248	906	874	1129
ENSMUST00000010899	Cars	7;7;7;7;7;7;7;7;7;7;7;7;7;7;7;7;7;7;7;7;7;7;7	143557230;143559128;143559649;143561859;143562961;143564984;143568315;143568933;143569400;143569833;143570020;143570542;143571484;143574513;143575918;143576586;143584648;143585699;143586415;143587105;143588492;143592412;143599982	143558006;143559211;143559708;143561926;143563041;143565065;143568383;143569122;143569497;143569936;143570149;143570670;143571596;143574634;143576006;143576726;143584797;143585797;143586511;143587193;143588583;143592660;143600090	-;-;-;-;-;-;-;-;-;-;-;-;-;-;-;-;-;-;-;-;-;-;-	3222	11	11	11	4	10	11	6	5	12	16	4	9	8	17
ENSMUST00000010904	Phlda2	7;7	143501545;143502057	143501816;143502541	-;-	757	0	1	0	0	0	3	0	0	16	10	12	17	14	9
ENSMUST00000010940	Asz1	6;6;6;6;6;6;6;6;6;6;6;6;6	18050964;18054528;18055435;18071965;18073762;18074826;18075761;18076505;18077153;18103500;18104776;18108403;18108932	18051403;18054641;18055540;18072074;18073818;18074901;18075885;18076639;18077264;18103611;18104898;18108502;18109057	-;-;-;-;-;-;-;-;-;-;-;-;-	1736	0	0	0	0	0	0	0	0	0	0	0	0	0	0
ENSMUST00000010941	Wnt2	6;6;6;6;6	17988940;18008584;18023061;18027924;18030205	17990043;18008848;18023338;18028150;18030585	-;-;-;-;-	2255	0	0	0	0	0	0	0	0	0	0	3	0	0	0
ENSMUST00000010969	Grid2ip	5;5;5;5;5;5;5;5;5;5;5;5;5;5;5;5;5;5;5;5;5	143363908;143372994;143373431;143374400;143375252;143375550;143377489;143379252;143380100;143380386;143381583;143382514;143386007;143386721;143387318;143387822;143388109;143388649;143388867;143391041;143391397	143363975;143373242;143373516;143374469;143375346;143375733;143377643;143379392;143380197;143380503;143381938;143382930;143386094;143386798;143387514;143387977;143388195;143388778;143388985;143391205;143391798	+;+;+;+;+;+;+;+;+;+;+;+;+;+;+;+;+;+;+;+;+	3459	0	0	0	0	0	0	0	0	0	0	0	0	0	0
ENSMUST00000010974	Kdelr3	15;15;15;15;15	79516408;79522811;79524804;79525667;79527072	79516640;79522911;79524962;79525919;79527739	+;+;+;+;+	1414	2	17	14	4	3	4	3	2	78	105	158	97	78	106
ENSMUST00000010985	Cfap97d1	11;11;11;11;11;11	101987056;101987947;101988446;101990794;101991456;101992120	101987237;101988017;101988564;101990917;101991512;101992264	+;+;+;+;+;+	698	0	0	0	0	0	0	0	0	0	0	0	0	0	0
ENSMUST00000011029	Dnajc19	3;3;3;3;3;3	34056020;34078775;34079205;34080084;34080231;34081186	34058114;34078845;34079284;34080157;34080282;34081312	-;-;-;-;-;-	2499	32	19	27	24	20	25	14	5	69	79	248	50	77	84
ENSMUST00000011055	Apip	2;2;2;2;2;2;2	103073675;103082955;103087113;103088561;103089403;103091749;103092465	103073841;103083055;103087161;103088678;103089538;103091916;103092644	+;+;+;+;+;+;+	919	0	0	0	0	0	0	0	0	2	3	1	1	0	1
ENSMUST00000011058	Pdhx	2;2;2;2;2;2;2;2;2;2;2	103021075;103024165;103028276;103030278;103033163;103035215;103041043;103042194;103046721;103058497;103073290	103022269;103024229;103028434;103030336;103033310;103035389;103041141;103042393;103046821;103058577;103073513	-;-;-;-;-;-;-;-;-;-;-	2506	337	306	403	226	340	369	160	161	1682	1648	670	1528	1547	1657
ENSMUST00000011152	Mcoln2	3;3;3;3;3;3;3;3;3;3;3;3;3;3	146149833;146163535;146169932;146171953;146175457;146175657;146176511;146180159;146181706;146183467;146183674;146190260;146192228;146194755	146150006;146163694;146170105;146172106;146175541;146175753;146176610;146180271;146181855;146183568;146183796;146190466;146192349;146195513	+;+;+;+;+;+;+;+;+;+;+;+;+;+	2520	0	0	0	0	0	0	0	0	0	0	0	0	0	0
ENSMUST00000011178	Slc5a1	5;5;5;5;5;5;5;5;5;5;5;5;5;5;5	33104219;33116783;33131950;33133386;33134603;33143963;33145250;33146507;33146943;33148897;33152559;33154546;33158088;33159077;33160779	33104591;33116854;33132054;33133445;33134707;33144068;33145330;33146727;33147078;33149004;33152709;33154714;33158303;33159185;33162872	+;+;+;+;+;+;+;+;+;+;+;+;+;+;+	4106	20	52	157	153	12	17	4	12	243	486	537	357	438	316
ENSMUST00000011196	Dusp1	17;17	26554254;26561292	26554466;26561499	-;-	421	1	2	0	0	0	1	0	0	3	0	1	2	0	0
ENSMUST00000011262	Panx3	9;9;9;9	37659902;37664026;37666609;37668875	37661713;37664240;37666751;37669222	-;-;-;-	2518	0	9	14	1	2	2	0	2	66	56	32	71	63	83
ENSMUST00000011285	Fgf11	11;11;11;11;11;11	69796068;69798165;69798564;69799352;69799666;69801433	69797879;69798272;69798678;69799455;69799776;69801716	-;-;-;-;-;-	2534	0	0	0	0	0	0	0	0	0	0	0	0	0	0
ENSMUST00000011298	Cfap161	7;7;7;7;7;7;7	83775617;83777070;83780164;83791632;83793209;83793996;83794742	83776162;83777143;83780322;83791722;83793444;83794085;83794880	-;-;-;-;-;-;-	1335	0	0	0	0	0	0	0	0	0	0	0	0	0	2
ENSMUST00000011302	Brf1	12;12;12;12;12;12;12;12;12;12;12;12;12;12;12;12;12;12	112959862;112961110;112961723;112962376;112963377;112963510;112964184;112965729;112969265;112969442;112970097;112972262;112973472;112979685;112983027;112987917;112993064;113000173	112960358;112961281;112961774;112962632;112963432;112963591;112964245;112965992;112969357;112969481;112970223;112972355;112973621;112979757;112983056;112988092;112993144;113000621	-;-;-;-;-;-;-;-;-;-;-;-;-;-;-;-;-;-	2755	1112	980	1123	859	1077	1053	327	333	1868	1613	895	1406	1500	1795
ENSMUST00000011315	Vipr2	12;12;12;12;12;12;12;12;12;12;12;12;12	116077728;116080033;116092645;116094721;116122711;116130101;116136109;116137313;116138675;116139148;116142754;116142950;116144137	116077893;116080132;116092752;116094818;116122808;116130242;116136259;116137373;116138744;116139239;116142883;116142991;116146261	+;+;+;+;+;+;+;+;+;+;+;+;+	3383	0	0	4	0	0	2	0	0	2	8	0	7	1	0
ENSMUST00000011391	Prss45	9;9;9;9;9;9	110834588;110836066;110838421;110839022;110840387;110840845	110834739;110836092;110838568;110839296;110840550;110841313	+;+;+;+;+;+	1235	0	0	0	0	0	0	0	0	0	0	0	0	0	0
ENSMUST00000011398	Thg1l	11;11;11;11;11;11	45946843;45950196;45951543;45952735;45954056;45955275	45948328;45950303;45951631;45952904;45954232;45955494	-;-;-;-;-;-	2250	1	0	1	1	2	2	0	0	10	5	3	6	11	13
ENSMUST00000011400	Adam19	11;11;11;11;11;11;11;11;11;11;11;11;11;11;11;11;11;11;11;11;11;11;11	46055992;46060923;46065012;46093863;46099853;46112757;46113623;46118420;46121420;46123093;46125008;46127246;46128786;46131623;46134428;46136248;46137364;46137540;46138837;46139693;46140006;46142919;46143792	46056210;46061008;46065082;46093941;46099929;46112949;46113688;46118491;46121586;46123177;46125147;46127423;46128875;46131818;46134536;46136461;46137441;46137648;46138975;46139777;46140230;46143071;46147343	+;+;+;+;+;+;+;+;+;+;+;+;+;+;+;+;+;+;+;+;+;+;+	6383	358	335	452	231	404	318	124	97	1357	1305	331	1164	996	1259
ENSMUST00000011407	Exoc3l2	7;7;7;7;7	19489056;19489608;19489741;19491656;19494957	19489174;19489739;19489763;19491777;19496760	+;+;+;+;+	2200	0	0	0	0	0	0	0	0	0	0	0	0	0	0
ENSMUST00000011445	Cd209d	8;8;8;8;8;8;8	3871827;3873739;3876254;3877056;3877880;3878251;3878438	3872110;3873848;3876405;3877130;3877969;3878337;3878555	-;-;-;-;-;-;-	916	0	4	14	1	0	0	0	0	2	4	0	0	1	2
ENSMUST00000011450	Sugp1	8;8;8;8;8;8;8;8;8;8;8;8;8;8	70042813;70048509;70052591;70056386;70059282;70059753;70060536;70064837;70069452;70069996;70070331;70071114;70071522;70071806	70043080;70048680;70052691;70056604;70059405;70059853;70060659;70065198;70069558;70070173;70070437;70071259;70071651;70071953	+;+;+;+;+;+;+;+;+;+;+;+;+;+	2287	584	527	654	395	644	606	246	232	1149	820	172	860	849	1181
ENSMUST00000011492	Acad9	3;3;3;3;3;3;3;3;3;3;3;3;3;3;3;3;3;3	36065979;36069710;36073507;36074350;36075243;36075976;36076722;36078438;36080221;36081811;36082109;36085414;36087720;36088488;36088815;36089332;36090082;36090831	36066270;36069803;36073608;36074456;36075343;36076054;36076896;36078511;36080296;36081881;36082228;36085542;36087799;36088614;36088892;36089460;36090154;36094944	+;+;+;+;+;+;+;+;+;+;+;+;+;+;+;+;+;+	6021	52	47	64	49	46	56	18	18	517	448	351	460	460	489
ENSMUST00000011493	Dmrtc2	7;7;7;7;7;7;7;7;7	24870057;24872478;24872780;24873922;24874198;24874907;24875748;24875949;24877153	24870172;24872705;24872934;24873998;24874378;24875033;24875808;24876123;24877651	+;+;+;+;+;+;+;+;+	1619	0	0	0	0	0	0	0	0	0	0	0	0	0	0
ENSMUST00000011526	Dhdh	7;7;7;7;7;7;7	45472956;45475605;45479009;45481789;45486741;45488060;45488674	45475375;45475752;45479133;45482041;45486904;45488171;45488805	-;-;-;-;-;-;-	3354	99	161	144	81	149	68	26	35	648	579	348	535	573	635
ENSMUST00000011607	Cpb1	3;3;3;3;3;3;3;3;3;3;3	20248264;20251955;20262410;20263506;20263678;20265349;20266226;20266424;20270243;20275420;20275586	20249838;20252039;20262612;20263596;20263788;20265450;20266327;20266523;20270367;20275495;20275733	-;-;-;-;-;-;-;-;-;-;-	2718	0	0	0	0	0	0	0	0	1	0	0	0	1	0
ENSMUST00000011623	Dennd1c	17;17;17;17;17;17;17;17;17;17;17;17;17;17;17;17;17;17;17;17;17;17;17;17	57066056;57066732;57067049;57067593;57067789;57067917;57070113;57070408;57070530;57070919;57071572;57071788;57072009;57072336;57073773;57073974;57074114;57074274;57074493;57075369;57076647;57076818;57076941;57078390	57066641;57066942;57067116;57067700;57067833;57067949;57070184;57070448;57070623;57071023;57071697;57071889;57072054;57072436;57073883;57074027;57074179;57074354;57074562;57075488;57076696;57076861;57077005;57078510	-;-;-;-;-;-;-;-;-;-;-;-;-;-;-;-;-;-;-;-;-;-;-;-	2520	29	150	156	65	58	75	22	35	160	182	49	139	159	287
ENSMUST00000011733	Fsd1	17;17;17;17;17;17;17;17;17;17;17;17;17	55986511;55987743;55988124;55988674;55990212;55990419;55991167;55993843;55995357;55995858;55996072;55996421;55996642	55986653;55987838;55988255;55988775;55990234;55990540;55991376;55993941;55995516;55995937;55996323;55996509;55996881	+;+;+;+;+;+;+;+;+;+;+;+;+	1748	332	298	381	285	383	345	123	157	503	398	76	312	345	563
ENSMUST00000011776	Pinlyp	7;7;7;7;7	24541699;24542116;24542441;24544931;24545924	24541891;24542259;24542593;24545047;24546071	-;-;-;-;-	755	1	5	3	5	0	5	0	2	9	6	3	2	4	7
ENSMUST00000011877	Sptbn1	11;11;11;11;11;11;11;11;11;11;11;11;11;11;11;11;11;11;11;11;11;11;11;11;11;11;11;11;11;11;11;11;11;11;11	30099396;30101613;30103248;30104436;30109089;30109871;30110726;30112827;30113856;30114676;30117636;30118291;30119377;30120530;30120976;30121476;30123799;30124866;30129570;30135940;30136874;30138364;30138592;30140471;30142120;30143019;30144106;30145829;30146739;30149500;30149930;30151556;30154229;30159294;30219579	30100714;30101655;30103421;30104674;30109152;30109980;30110922;30112911;30113994;30114920;30118010;30118495;30119507;30120811;30121065;30121700;30124062;30125012;30129660;30136142;30137630;30138501;30139462;30140624;30142422;30143177;30144223;30146016;30146851;30149615;30150010;30151647;30154402;30159445;30219772	-;-;-;-;-;-;-;-;-;-;-;-;-;-;-;-;-;-;-;-;-;-;-;-;-;-;-;-;-;-;-;-;-;-;-	8238	0	0	0	0	0	0	0	0	0	0	0	0	0	0
ENSMUST00000011895	Sptbn4	7;7;7;7;7;7;7;7;7;7;7;7;7;7;7;7;7;7;7;7;7;7;7;7;7;7;7;7;7;7;7;7;7;7;7;7	27356383;27359743;27359935;27361567;27362396;27364071;27365564;27366408;27366600;27367600;27369189;27370402;27371874;27372097;27374146;27375373;27391433;27394158;27397951;27402736;27404168;27407111;27408243;27414658;27416705;27417958;27418371;27418565;27418988;27423709;27426826;27428184;27433048;27434206;27442395;27446463	27357450;27359785;27360108;27361859;27362468;27364690;27365760;27366492;27366738;27367844;27369569;27370606;27372004;27372375;27374235;27375597;27391696;27394304;27398041;27402938;27404918;27407248;27409176;27414808;27417007;27418116;27418488;27418752;27419100;27423824;27426906;27428275;27433221;27434357;27442581;27446599	-;-;-;-;-;-;-;-;-;-;-;-;-;-;-;-;-;-;-;-;-;-;-;-;-;-;-;-;-;-;-;-;-;-;-;-	8747	0	0	0	0	0	0	0	0	0	0	0	0	0	0
ENSMUST00000011896	Pgam1	19;19;19;19	41911871;41915605;41916643;41917606	41912186;41915879;41916823;41918664	+;+;+;+	1831	676	632	680	600	665	683	396	438	334	277	12	247	218	345
[truncated: 99,017 more rows]

## Sheet: TPM
ID	symbol	Chr	Start	End	Strand	Length	RNA-seq_KO1	RNA-seq_KO2	RNA-seq_KO3	RNA-seq_KO4	RNA-seq_WT1	RNA-seq_WT2	RNA-seq_WT3	RNA-seq_WT4	Ribo-seq_KO1	Ribo-seq_KO2	Ribo-seq_KO3	Ribo-seq_WT1	Ribo-seq_WT2	Ribo-seq_WT3
ENSMUST00000000001	Gnai3	3;3;3;3;3;3;3;3;3	108107280;108109403;108111935;108112473;108115763;108118301;108123542;108123795;108145888	108109316;108109612;108112088;108112602;108115891;108118458;108123683;108123837;108146146	-;-;-;-;-;-;-;-;-	3262	66.5296	105.119	115.786	109.855	60.8018	51.3286	78.3073	83.8441	144.477	187.65	218.019	177.381	160.789	195.744
ENSMUST00000000003	Pbsn	X;X;X;X;X;X;X	77837901;77841860;77842515;77842897;77845019;77847975;77853409	77838114;77841911;77842616;77843007;77845086;77848114;77853623	-;-;-;-;-;-;-	902	0	0	0	0	0	0	0	0	0	0	0	0	0	0
ENSMUST00000000010	Hoxb9	11;11	96271457;96274624	96272058;96276595	+;+	2574	0	0	0	4.22519	0	0	0	0	0	0	0	0	0	0
ENSMUST00000000028	Cdc45	16;16;16;16;16;16;16;16;16;16;16;16;16;16;16;16;16;16;16;16	18780447;18781896;18784806;18785073;18786769;18786930;18793178;18794762;18795095;18795825;18797349;18798676;18801801;18805382;18807280;18808732;18810389;18811305;18811515;18811804	18780573;18781962;18784882;18785191;18786852;18787068;18793339;18794860;18795226;18795944;18797399;18798737;18801849;18805437;18807423;18808869;18810481;18811364;18811709;18811972	-;-;-;-;-;-;-;-;-;-;-;-;-;-;-;-;-;-;-;-	2143	0	0.372764	0	0	0	0	0	0	0.142342	0	0	0	0	0.420954
[truncated: 100,245 more rows]

## Sheet: All Olfr genes
		The expression of all annotated Olfr genes in Upf3b-null and control mOSNs, based on our RNA-seq datasets
[truncated: 1,229 more rows]
