# Supplementary material for: The role of the NMD factor UPF3B in olfactory sensory neurons
Source: eLife. 2020 Aug 10;9:e57525. doi: 10.7554/eLife.57525 (PMC7452722; doi:10.7554/eLife.57525)
Supplement: Supplementary file 2. — (1) Genes differentially expressed between Upf3b-null and WT mOSNs (as defined by RNA-seq analysis), including their known NIFs. (2) High-confidence NMD targets: transcripts both upregulated and stabilized in Upf3b-null mOSNs. (3) The transcriptome and translome of Upf3b-null and WT mOSNs, based on RNA-seq and RiboTag analyses. (4) Translational efficiency (TE) of RNAs expressed in Upf3b-null and WT mOSNs, as defined by RNA-seq and RiboTag analyses. [file elife-57525-supp2.xlsx]

## Sheet: RNAseq DEGs and NMD features
NMD features analysis of significantly changed genes after Upf3b-loss from bulk RNAseq
TranscriptID	GeneSymbol	log2FoldChange	padj	dEJ	uORF	3'UTR length
ENSMUST00000106899	Cxcr2	5.79669	0.0137484	FALSE	FALSE	1818
ENSMUST00000027237	Il18rap	5.05541	0.0438388	FALSE	TRUE	2617
ENSMUST00000168866	Gm3164	4.86035	0.0193834	FALSE	TRUE	1057
ENSMUST00000118257	Gm4875	4.84798	0.00374525	-	-	-
ENSMUST00000029297	Slc7a11	4.76753	7.82976e-06	FALSE	TRUE	7364
ENSMUST00000037994	Slfn1	4.26533	0.0379227	FALSE	FALSE	597
ENSMUST00000093193	Dock2	4.20737	0.0254405	FALSE	FALSE	853
ENSMUST00000050143	Gm7729	4.13783	0.0143245	-	-	-
ENSMUST00000002298	Ppm1j	4.09398	0.0360128	FALSE	FALSE	166
ENSMUST00000033505	Was	3.96488	0.0361118	FALSE	FALSE	481
ENSMUST00000031281	Antxr2	3.9284	2.48843e-06	FALSE	FALSE	3779
ENSMUST00000032968	Cd19	3.83099	0.0150995	FALSE	FALSE	755
ENSMUST00000070690	Ptafr	3.76775	0.0373418	FALSE	FALSE	2357
ENSMUST00000047737	Irf8	3.60315	0.0153922	FALSE	FALSE	1519
ENSMUST00000045154	Themis2	3.49602	0.0154636	FALSE	FALSE	1053
ENSMUST00000023531	Hcls1	3.36322	0.0200376	FALSE	FALSE	463
ENSMUST00000077659	Atp10b	3.31566	0.0176173	FALSE	FALSE	2384
ENSMUST00000049931	Spn	3.09374	0.0254405	FALSE	FALSE	2444
ENSMUST00000103416	Ighg2c	3.07253	0.0191826	-	-	-
ENSMUST00000076155	Eno1b	3.07073	2.99919e-12	FALSE	FALSE	317
ENSMUST00000151188	Gm15348	3.06932	0.00640324	-	-	-
ENSMUST00000031017	Fosl2	3.04277	0.000705169	FALSE	TRUE	4653
ENSMUST00000031851	Tmem213	3.03671	0.0156878	FALSE	FALSE	91
ENSMUST00000046891	Ptger2	3.03222	0.0356639	FALSE	TRUE	1825
ENSMUST00000043214	Rac2	3.02903	0.0383919	FALSE	FALSE	2319
ENSMUST00000038038	Slfn2	3.02217	0.00647277	FALSE	TRUE	345
ENSMUST00000052380	Insl6	3.01699	0.00666102	FALSE	FALSE	91
ENSMUST00000058178	Tacstd2	2.97265	0.0438388	0	FALSE	691
ENSMUST00000173406	Trp53inp2	2.78884	0.00170659	-	-	-
ENSMUST00000030868	Sema3d	2.74727	0.0453619	FALSE	FALSE	3646
ENSMUST00000096040	Svopl	2.61077	0.0259723	FALSE	FALSE	773
ENSMUST00000079957	Fcer1g	2.61044	0.0176173	FALSE	FALSE	293
ENSMUST00000096224	Adcy6	2.58701	0.00207761	FALSE	TRUE	2356
ENSMUST00000011178	Slc5a1	2.56358	0.00527043	FALSE	FALSE	1868
ENSMUST00000001327	Itgb7	2.55395	0.0149543	FALSE	FALSE	165
ENSMUST00000080953	Lrp2	2.50428	0.00853385	FALSE	TRUE	1305
ENSMUST00000050160	AU021092	2.4944	0.0268861	FALSE	FALSE	164
ENSMUST00000080893	Krt17	2.4699	0.0438388	FALSE	FALSE	185
ENSMUST00000029846	Cyr61	2.43976	0.0438388	FALSE	FALSE	690
ENSMUST00000103122	Tgm2	2.39593	0.0429932	FALSE	FALSE	1399
ENSMUST00000028403	Cybrd1	2.37284	0.00273262	FALSE	FALSE	4269
ENSMUST00000023779	Nr4a1	2.36455	0.00874186	FALSE	FALSE	540
ENSMUST00000033427	Sash3	2.35266	0.0332452	FALSE	TRUE	1309
ENSMUST00000140565	Kirrel2	2.32448	0.000614859	-	-	-
ENSMUST00000099337	Plxnc1	2.32217	0.0485666	FALSE	TRUE	2320
ENSMUST00000000642	Hk2	2.29605	0.0331608	FALSE	FALSE	2285
ENSMUST00000055327	Aqp3	2.24672	0.000238978	FALSE	FALSE	812
ENSMUST00000000395	Tmprss2	2.16767	0.00586689	FALSE	FALSE	1456
ENSMUST00000043069	Cyth4	2.16222	0.0451052	FALSE	FALSE	1455
ENSMUST00000033952	Sfrp1	2.13632	0.00874186	FALSE	FALSE	3144
ENSMUST00000056740	Gldn	2.11591	0.0458411	FALSE	FALSE	2970
ENSMUST00000159140	Tle3	2.05579	6.29801e-08	-	-	-
ENSMUST00000024839	Sik1	2.02763	1.48174e-06	FALSE	FALSE	2035
ENSMUST00000045902	Fmo2	2.02039	0.0148148	FALSE	FALSE	2411
ENSMUST00000027566	Serpinb11	1.99156	0.00271887	FALSE	TRUE	468
ENSMUST00000056946	Neurl3	1.96631	0.00545968	FALSE	FALSE	1763
ENSMUST00000038463	Raver2	1.92119	0.0277793	FALSE	FALSE	1892
ENSMUST00000046285	C1qa	1.92028	0.0398616	FALSE	FALSE	237
ENSMUST00000024866	Xdh	1.895	0.0397831	FALSE	FALSE	525
ENSMUST00000022682	Sorbs3	1.87044	0.000937188	FALSE	FALSE	702
ENSMUST00000033325	Swap70	1.86344	0.00999307	FALSE	FALSE	2169
ENSMUST00000058914	Tuba1c	1.82019	7.82976e-06	FALSE	FALSE	96
ENSMUST00000051241	Zfp36	1.8027	0.0251652	FALSE	TRUE	774
ENSMUST00000130189	A230056P14Rik	1.76584	0.000435865	-	-	-
ENSMUST00000112979	Catsperd	1.76022	0.0162878	FALSE	FALSE	101
ENSMUST00000052072	Tmem221	1.75614	0.0332452	FALSE	FALSE	849
ENSMUST00000188146	Gm29296	1.70904	0.00166839	-	-	-
ENSMUST00000035804	Cdo1	1.69616	0.0156305	FALSE	FALSE	727
ENSMUST00000090940	Ermn	1.68652	0.00579285	FALSE	FALSE	2641
ENSMUST00000079812	Notch2	1.68375	0.0477327	FALSE	FALSE	2917
ENSMUST00000092143	Msrb3	1.66885	0.0333877	FALSE	FALSE	2972
ENSMUST00000098657	Cyp2a4	1.65814	0.0174812	FALSE	FALSE	204
ENSMUST00000129826	Dhps	1.61392	0.0429443	-	-	-
ENSMUST00000150030	Repin1	1.60661	0.0397453	-	-	-
ENSMUST00000047877	Dok3	1.57897	0.00527043	FALSE	FALSE	187
ENSMUST00000067784	Cdh24	1.5609	0.00130282	FALSE	TRUE	121
ENSMUST00000032489	Ltbr	1.54772	0.0462144	FALSE	FALSE	659
ENSMUST00000032944	Gdpd3	1.53743	6.63584e-05	FALSE	FALSE	18
ENSMUST00000050916	Snx33	1.51203	0.0124172	FALSE	TRUE	1258
ENSMUST00000045726	Rgl3	1.45399	0.0429824	FALSE	FALSE	364
ENSMUST00000032194	Bhlhe40	1.43542	0.000192201	FALSE	FALSE	1593
ENSMUST00000026408	Gdf11	1.42923	0.00535293	FALSE	FALSE	2811
ENSMUST00000024857	Lbh	1.41731	0.0243151	FALSE	FALSE	2498
ENSMUST00000114366	Aox2	1.36834	0.0180355	FALSE	FALSE	1640
ENSMUST00000117338	Eml2	1.31018	0.0192807	FALSE	TRUE	46
ENSMUST00000020692	Btg2	1.28115	0.000173358	FALSE	FALSE	2199
ENSMUST00000039259	Agap2	1.2646	0.000989982	FALSE	FALSE	1357
ENSMUST00000006431	Atp6v1b1	1.22433	0.0438388	FALSE	FALSE	362
ENSMUST00000140523	Slc38a6	1.21151	0.0258467	FALSE	FALSE	1512
ENSMUST00000034860	Cyp1a2	1.20799	0.0331608	FALSE	FALSE	291
ENSMUST00000118605	Inpp5f	1.17806	0.0438388	FALSE	TRUE	949
ENSMUST00000051053	Ubtd2	1.17394	0.0202636	FALSE	FALSE	200
ENSMUST00000134218	Trp53inp2	1.14444	0.0462144	0	TRUE	0
ENSMUST00000147561	Fam98c	1.1064	0.00923818	-	-	-
ENSMUST00000025411	Prelid3a	1.09997	0.00374525	TRUE	FALSE	1572
ENSMUST00000106440	Trim65	1.08363	0.0415831	FALSE	FALSE	2730
ENSMUST00000021674	Fos	1.06173	0.0207689	FALSE	FALSE	815
ENSMUST00000034510	Nectin1	1.0355	0.0124172	FALSE	TRUE	3445
ENSMUST00000078647	Rab43	1.03315	0.0150995	FALSE	FALSE	3737
ENSMUST00000004622	Gab2	0.98414	0.00301831	FALSE	FALSE	3927
ENSMUST00000178231	Adat3	0.931707	0.0491338	TRUE	TRUE	3157
ENSMUST00000051943	Olfr524	0.862324	0.00965179	0	FALSE	69
ENSMUST00000169273	Ndst1	0.859388	0.0332452	FALSE	FALSE	3267
ENSMUST00000035987	Map3k9	0.79841	0.0215549	FALSE	FALSE	1029
ENSMUST00000176510	Xkr6	0.797452	0.0138901	-	-	-
ENSMUST00000029131	Ggt7	0.77126	0.0207689	FALSE	FALSE	574
ENSMUST00000021921	Ptch1	0.768864	0.0108798	FALSE	TRUE	3205
ENSMUST00000021207	Rflnb	0.755198	0.0176173	FALSE	FALSE	2716
ENSMUST00000085658	6030419C18Rik	0.73232	0.0361118	FALSE	TRUE	55
ENSMUST00000022709	Spry2	0.727682	0.0078807	FALSE	FALSE	854
ENSMUST00000100635	Fam84b	0.719841	0.00170382	FALSE	TRUE	3969
ENSMUST00000126664	Atp10d	0.713948	0.00676023	FALSE	FALSE	1529
ENSMUST00000023203	Gpt	0.671396	0.0348609	FALSE	FALSE	164
ENSMUST00000027404	Ptprn	0.670033	0.0451052	FALSE	FALSE	522
ENSMUST00000050467	Tob2	0.667082	0.00145338	FALSE	FALSE	2459
ENSMUST00000044581	1700025G04Rik	0.662926	0.0129888	FALSE	TRUE	8870
ENSMUST00000055808	Ywhag	0.644673	0.017707	FALSE	FALSE	2586
ENSMUST00000153938	Camta1	0.617985	0.00853385	TRUE	FALSE	1900
ENSMUST00000087622	Plekha5	0.608634	0.00421604	FALSE	FALSE	3461
ENSMUST00000058162	Mafg	0.577538	0.0467128	FALSE	TRUE	4167
ENSMUST00000075540	Mcm9	0.561652	0.00249135	FALSE	0	1009
ENSMUST00000021413	Nfkbia	0.552636	0.0124172	FALSE	FALSE	512
ENSMUST00000092627	9330159F19Rik	0.542375	0.0176173	FALSE	TRUE	3408
ENSMUST00000071703	Zcchc6	0.512078	0.00301782	FALSE	FALSE	1346
ENSMUST00000114976	Luc7l	0.492061	8.18664e-05	FALSE	FALSE	3738
ENSMUST00000037646	Prdm4	0.420203	0.0279453	FALSE	TRUE	1160
ENSMUST00000037397	Cep126	0.393099	0.0295358	FALSE	FALSE	423
ENSMUST00000032065	Pcyox1	-0.413792	0.00999371	FALSE	FALSE	2707
ENSMUST00000072299	Vsnl1	-0.425557	0.0497203	FALSE	TRUE	1065
ENSMUST00000048937	Leo1	-0.437344	0.0387507	FALSE	FALSE	134
ENSMUST00000005057	Thop1	-0.44519	0.0160353	FALSE	FALSE	540
ENSMUST00000034443	Cdh15	-0.453161	0.0235425	FALSE	TRUE	374
ENSMUST00000025811	Yif1a	-0.46356	0.0201858	FALSE	TRUE	431
ENSMUST00000076034	B3gnt8	-0.488348	0.0177878	FALSE	FALSE	176
ENSMUST00000032710	Slc17a6	-0.504727	0.0469815	FALSE	TRUE	1759
ENSMUST00000026210	Cpn1	-0.519764	0.0478419	FALSE	TRUE	186
ENSMUST00000024620	Chd1	-0.53908	0.0154636	FALSE	FALSE	1279
ENSMUST00000023714	Krt90	-0.611244	0.0129591	FALSE	FALSE	792
ENSMUST00000040914	Hist1h1c	-0.613765	0.0367604	0	FALSE	880
ENSMUST00000098138	Olfr17	-0.625816	0.0438388	-	-	-
ENSMUST00000112168	Olfr55	-0.728488	0.000761337	-	-	-
ENSMUST00000187211	Faim	-0.781323	0.00874186	-	-	-
ENSMUST00000044385	Sgtb	-0.803279	0.000469494	FALSE	FALSE	1884
ENSMUST00000071204	Ppef1	-0.851649	0.0353972	FALSE	FALSE	410
ENSMUST00000161788	Fut10	-0.866445	0.0260787	FALSE	TRUE	1265
ENSMUST00000100144	Olfr362	-0.882471	0.0383919	-	-	-
ENSMUST00000063151	Olfr479	-0.893057	0.00610392	0	FALSE	100
ENSMUST00000075756	Olfr212	-0.901205	0.0438388	FALSE	TRUE	1203
ENSMUST00000057924	Olfr1442	-0.902141	0.045558	0	FALSE	98
ENSMUST00000079875	Olfr1418	-0.919416	0.00426316	0	FALSE	65
ENSMUST00000051563	Olfr728	-0.970478	0.0367263	-	-	-
ENSMUST00000059880	Olfr1326-ps1	-0.987579	0.0422266	FALSE	TRUE	1486
ENSMUST00000043081	Olfr11	-1.01183	0.00183524	-	-	-
ENSMUST00000142270	4932412D23Rik	-1.02049	0.000367974	-	-	-
ENSMUST00000088876	Olfr1321	-1.02207	0.000661269	0	FALSE	29
ENSMUST00000062964	Olfr1412	-1.02781	0.0156305	-	-	-
ENSMUST00000054567	Olfr1440	-1.09161	0.00818789	-	-	-
ENSMUST00000077143	Olfr1383	-1.10028	0.000176614	0	TRUE	0
ENSMUST00000087824	Olfr1428	-1.13335	0.000761337	-	-	-
ENSMUST00000076936	Olfr115	-1.14202	0.0367604	-	-	-
ENSMUST00000121958	Olfr213	-1.14738	7.82976e-06	-	-	-
ENSMUST00000053050	Olfr1112	-1.20019	0.0277793	-	-	-
ENSMUST00000099605	Olfr1308	-1.20769	0.00273262	-	-	-
ENSMUST00000075640	Olfr1178	-1.21334	4.94061e-05	-	-	-
ENSMUST00000080313	Olfr777	-1.23945	0.0400021	-	-	-
ENSMUST00000187990	Olfr1246	-1.2492	0.00374525	0	FALSE	100
ENSMUST00000078532	Taar7a	-1.25603	0.00170382	-	-	-
ENSMUST00000075717	Olfr869	-1.26155	0.00555726	0	TRUE	0
ENSMUST00000185306	Rpl3	-1.2695	0.0400021	0	TRUE	0
ENSMUST00000121430	Gm12715	-1.28636	0.0438388	-	-	-
ENSMUST00000088921	Bpifb9b	-1.29447	0.000514083	FALSE	FALSE	215
ENSMUST00000087825	Olfr1427	-1.29547	0.000785911	0	TRUE	0
ENSMUST00000077580	Olfr1148	-1.30451	0.0451052	-	-	-
ENSMUST00000070304	Olfr1322	-1.30928	0.0112287	-	-	-
ENSMUST00000099775	Olfr1243	-1.3162	0.0438388	-	-	-
ENSMUST00000099751	Olfr1271	-1.32053	0.00301782	-	-	-
ENSMUST00000073507	Olfr235	-1.33874	0.00545968	0	TRUE	71
ENSMUST00000087831	Olfr1423	-1.35066	3.96322e-09	-	-	-
ENSMUST00000098952	Gm10704	-1.35684	0.00207761	-	-	-
ENSMUST00000096449	Olfr1320	-1.38113	0.0177878	-	-	-
ENSMUST00000056795	Olfr984	-1.38962	0.00105171	-	-	-
ENSMUST00000090717	Olfr1116	-1.41227	0.0147539	-	-	-
ENSMUST00000054541	Olfr1325	-1.41571	0.0248467	-	-	-
ENSMUST00000111532	Olfr1247	-1.41604	0.00249135	FALSE	TRUE	4197
ENSMUST00000099780	Olfr1239	-1.42432	0.00413286	-	-	-
ENSMUST00000087857	Olfr1419	-1.47074	4.24156e-05	0	FALSE	37
ENSMUST00000096201	Olfr1472	-1.48762	0.00087306	FALSE	TRUE	291
ENSMUST00000085862	Olfr417	-1.48989	0.0074671	-	-	-
ENSMUST00000099608	Olfr1305	-1.51653	0.00874186	-	-	-
ENSMUST00000121296	Olfr1117-ps1	-1.56798	0.0333877	0	FALSE	45
ENSMUST00000081996	Olfr487	-1.56865	0.00437551	-	-	-
ENSMUST00000099804	Olfr1214	-1.57287	0.00118698	-	-	-
ENSMUST00000087830	Olfr1424	-1.59896	1.75859e-07	-	-	-
ENSMUST00000072316	Olfr1431	-1.61789	0.00134139	-	-	-
ENSMUST00000058737	Olfr1150-ps1	-1.65072	0.0338541	0	FALSE	53
ENSMUST00000059244	Olfr820	-1.68154	0.00647277	0	FALSE	60
ENSMUST00000043944	Ano5	-1.69017	0.0248383	FALSE	TRUE	4864
ENSMUST00000104892	Olfr1196	-1.74614	0.000200423	-	-	-
ENSMUST00000122224	Olfr389	-1.83277	7.6195e-05	FALSE	TRUE	1538
ENSMUST00000059486	Olfr266	-1.84784	4.24156e-05	0	FALSE	51
ENSMUST00000053113	Olfr1489	-1.94062	0.00477945	0	TRUE	0
ENSMUST00000072057	Olfr1202	-1.99651	0.0286524	-	-	-
ENSMUST00000099598	Olfr1314	-2.12391	0.00545968	-	-	-
ENSMUST00000071112	Olfr297	-2.13	2.78332e-07	-	-	-
ENSMUST00000050733	Olfr902	-2.14426	0.0377798	0	FALSE	44
ENSMUST00000099814	Olfr1198	-2.14803	0.0016223	-	-	-
ENSMUST00000188299	Gm28438	-2.16568	2.37095e-05	-	-	-
ENSMUST00000099877	Olfr1087	-2.2385	0.00118634	-	-	-
ENSMUST00000069236	Olfr305	-2.35823	0.0286524	-	-	-
ENSMUST00000088040	Pcna-ps2	-2.43561	0.00207761	0	FALSE	330
ENSMUST00000071681	Olfr921	-2.49074	0.00216429	0	FALSE	156
ENSMUST00000099907	Olfr1043	-2.64935	0.0184006	-	-	-
ENSMUST00000069279	Olfr307	-2.81693	2.2028e-07	0	FALSE	47
ENSMUST00000093867	Olfr893	-2.85957	7.29656e-06	0	TRUE	0
ENSMUST00000102551	Olfr1293-ps	-2.89934	0.00131767	-	-	-
ENSMUST00000099824	Olfr1192-ps1	-2.92544	0.0156305	0	FALSE	100
ENSMUST00000137428	Tcp11l1	-3.05571	0.0489089	-	-	-
ENSMUST00000174362	Olfr301	-3.22513	0.0171626	FALSE	TRUE	725
ENSMUST00000099810	Olfr1208	-3.34018	2.04721e-13	0	FALSE	95
ENSMUST00000099599	Olfr1313	-3.44328	0.000989982	0	TRUE	0
ENSMUST00000081571	Olfr8	-3.52572	7.6195e-05	-	-	-
ENSMUST00000058123	Olfr827	-3.63836	6.36528e-22	0	FALSE	68
ENSMUST00000098689	Gm6166	-3.84316	0.00437551	-	-	-
ENSMUST00000077023	Olfr857	-3.94818	4.94061e-05	-	-	-
ENSMUST00000099769	Olfr1249	-3.99596	0.00370988	-	-	-
ENSMUST00000078414	Olfr1355	-4.18664	0.000123396	FALSE	TRUE	2160
ENSMUST00000084315	Olfr1338	-4.24411	0.0191826	-	-	-
ENSMUST00000052307	Olfr998	-4.40931	0.000769284	0	FALSE	35
ENSMUST00000072419	Olfr854	-4.45047	0.00923818	-	-	-
ENSMUST00000072114	Olfr338	-4.74479	0.0361118	FALSE	FALSE	4735
ENSMUST00000133481	Upf3b	-6.06614	6.57319e-05	-	-	-
ENSMUST00000117787	Olfr1268-ps1	-6.58223	0.000807299	FALSE	TRUE	1364
ENSMUST00000061693	Olfr855	-7.34047	2.2028e-07	0	FALSE	25
ENSMUST00000144727	Cwc22	-8.91421	0.0248066	-	-	-
ENSMUST00000076265	Upf3b	-9.57086	4.95455e-16	FALSE	FALSE	834

## Sheet: RNA stability
RNA stability assay
Geneid	GeneSymbol	log2FoldChange	padj	KO_1.x	KO_2.x	KO_3.x	KO_4.x	WT_1.x	WT_2.x	WT_3.x	WT_4.x
ENSMUST00000055327	Aqp3	2.24672	0.000238978	0.538204	0.590451	0.17166	0.492822	-0.453247	-0.231763	-0.100435	-1.00769
ENSMUST00000079957	Fcer1g	2.61044	0.0176173	-0.0635329	0.547569	0.709774	-0.0799165	0.0021431	0.0388456	-0.812004	-0.342878
ENSMUST00000078647	Rab43	1.03315	0.0150995	0.00687726	0.318974	0.403688	0.341529	-0.181297	-0.337686	-0.158862	-0.393223
ENSMUST00000079812	Notch2	1.68375	0.0477327	-0.224423	0.259781	0.567603	0.408664	-0.191133	-0.293484	-0.210794	-0.316215
ENSMUST00000021674	Fos	1.06173	0.0207689	0.443604	0.201081	0.178914	0.173209	-0.467683	-0.285469	-0.477662	0.234005
ENSMUST00000058914	Tuba1c	1.82019	7.82976e-06	0.4932	0.586071	0.0626306	-0.159595	-0.386299	-0.299614	-0.182713	-0.113681
ENSMUST00000050916	Snx33	1.51203	0.0124172	0.0671167	-0.141121	0.38271	0.670578	0.0679362	-0.222072	-0.185315	-0.639832
ENSMUST00000026408	Gdf11	1.42923	0.00535293	0.125179	0.192638	0.233258	0.379884	-0.140208	-0.0262921	-0.697592	-0.0668669
ENSMUST00000090940	Ermn	1.68652	0.00579285	-0.0370388	0.188606	0.304432	0.468559	-0.0920294	-0.208351	-0.0957706	-0.528407
ENSMUST00000055808	Ywhag	0.644673	0.017707	0.118116	0.0527078	0.475118	0.273659	-0.301497	-0.182013	-0.0826812	-0.353411
ENSMUST00000056740	Gldn	2.11591	0.0458411	-0.193385	0.408254	0.217405	0.470963	-0.304778	-0.030405	-0.177013	-0.391041
ENSMUST00000039259	Agap2	1.2646	0.000989982	0.245539	0.44806	0.079314	0.129546	-0.147438	-0.25353	-0.352571	-0.148921
ENSMUST00000033505	Was	3.96488	0.0361118	0.156947	0.0762955	0.811035	-0.146649	-0.0521208	-0.439383	-0.206031	-0.200093
ENSMUST00000024857	Lbh	1.41731	0.0243151	-0.373674	0.417945	0.634212	0.187043	-0.342374	-0.262587	-0.0153188	-0.245246
ENSMUST00000092143	Msrb3	1.66885	0.0333877	-0.196191	0.159076	0.382519	0.509748	-0.11613	-0.29896	-0.144675	-0.295386
ENSMUST00000050467	Tob2	0.667082	0.00145338	0.141319	0.108974	0.361291	0.242331	-0.089215	-0.149469	-0.330622	-0.28461
ENSMUST00000032194	Bhlhe40	1.43542	0.000192201	0.29882	0.0767914	0.116993	0.355403	-0.493375	-0.134847	-0.0992953	-0.120489
ENSMUST00000020692	Btg2	1.28115	0.000173358	0.328532	0.229108	0.315942	-0.0261034	-0.303639	-0.618863	0.0790114	-0.00398869
ENSMUST00000025411	Prelid3a	1.09997	0.00374525	0.163382	0.0856551	0.0433408	0.512693	-0.135206	-0.210641	-0.0962215	-0.363002
ENSMUST00000000395	Tmprss2	2.16767	0.00586689	0.171835	0.178827	0.167307	0.243719	0.0214222	-0.00630134	-0.324936	-0.451873
ENSMUST00000032489	Ltbr	1.54772	0.0462144	-0.370837	0.385468	0.418903	0.32687	-0.0613125	-0.38228	-0.0799144	-0.236897
ENSMUST00000087622	Plekha5	0.608634	0.00421604	0.176049	0.132591	0.129328	0.316622	-0.0736801	-0.158394	-0.0151877	-0.507329
ENSMUST00000071703	Zcchc6	0.512078	0.00301782	0.325966	0.0400865	0.176615	0.186849	-0.24056	-0.173401	-0.0806576	-0.234897
ENSMUST00000032968	Cd19	3.83099	0.0150995	0.185296	0.172628	0.332311	0.0345612	-0.0510442	-0.0289769	-0.516117	-0.128658
ENSMUST00000004622	Gab2	0.98414	0.00301831	0.0352883	0.302886	0.225925	0.155584	-0.0981526	-0.0765029	-0.320468	-0.224561
ENSMUST00000096040	Svopl	2.61077	0.0259723	-0.129517	0.414316	0.258145	0.148215	-0.156657	-0.343434	-0.462199	0.271132
ENSMUST00000044581	1700025G04Rik	0.662926	0.0129888	0.31673	0.169238	0.0913912	0.103615	-0.164509	-0.307787	0.0183985	-0.227077
ENSMUST00000077659	Atp10b	3.31566	0.0176173	-0.232178	0.134318	0.263694	0.499552	-0.00953174	-0.108347	-0.196407	-0.351101
ENSMUST00000024839	Sik1	2.02763	1.48174e-06	-0.0102161	-0.0926804	0.449459	0.303176	-0.00808015	-0.297096	0.112227	-0.456789
ENSMUST00000033325	Swap70	1.86344	0.00999307	0.0281306	0.249075	0.212223	0.148652	-0.0262265	-0.0170012	-0.420829	-0.174024
ENSMUST00000114366	Aox2	1.36834	0.0180355	-0.117007	0.357831	0.331997	0.0449963	0.0594031	0.0364089	-0.16634	-0.547289
ENSMUST00000006431	Atp6v1b1	1.22433	0.0438388	-0.165345	0.444012	0.0426769	0.275147	0.0117068	-0.320092	-0.469594	0.181488
ENSMUST00000028403	Cybrd1	2.37284	0.00273262	-0.610183	0.178628	0.561794	0.446917	-0.153021	-0.172611	-0.30319	0.051667
ENSMUST00000021413	Nfkbia	0.552636	0.0124172	-0.00325775	0.0217277	0.241514	0.29941	-0.143832	-0.22323	0.0166687	-0.209001
ENSMUST00000114976	Luc7l	0.492061	8.18664e-05	0.237175	0.280603	-0.0940959	0.134584	0.0307746	-0.138563	-0.365849	-0.0846293
ENSMUST00000001327	Itgb7	2.55395	0.0149543	-0.157268	0.449758	0.463622	-0.21259	-0.269318	0.145017	-0.390548	-0.0286718
ENSMUST00000022709	Spry2	0.727682	0.0078807	-0.00341811	0.179174	0.133915	0.230523	-0.17214	-0.130188	-0.12405	-0.113815
ENSMUST00000100635	Fam84b	0.719841	0.00170382	0.288398	0.0934252	0.133337	0.0217037	-0.014359	-0.302813	0.125221	-0.344913
ENSMUST00000032944	Gdpd3	1.53743	6.63584e-05	0.279039	0.213532	-0.219031	0.233285	-0.044075	0.177204	-0.170319	-0.469636
ENSMUST00000011178	Slc5a1	2.56358	0.00527043	-0.137588	-0.438371	0.493219	0.582145	-0.303949	0.0308092	-0.346198	0.119933
ENSMUST00000092627	9330159F19Rik	0.542375	0.0176173	0.254668	0.0635613	-0.0459309	0.209597	-0.11021	-0.195989	-0.0246902	-0.151006
ENSMUST00000096224	Adcy6	2.58701	0.00207761	0.110749	0.112771	0.122276	0.134817	-0.29373	-0.3648	0.0749836	0.102933
ENSMUST00000037646	Prdm4	0.420203	0.0279453	0.00902972	0.0491869	0.0168423	0.354994	-0.0357375	-0.117164	-0.130125	-0.147026
ENSMUST00000021207	Rflnb	0.755198	0.0176173	-0.0893723	-0.145027	0.21996	0.434585	-0.197635	-0.236917	0.235636	-0.221229
ENSMUST00000029846	Cyr61	2.43976	0.0438388	-0.393828	0.218677	0.116592	0.472652	0.0136317	-0.21899	-0.162628	-0.0461056
ENSMUST00000085658	6030419C18Rik	0.73232	0.0361118	0.102639	0.0246446	0.0395506	0.222519	-0.00339118	-0.114027	-0.0645801	-0.207354
ENSMUST00000151188	Gm15348	3.06932	0.00640324	-0.0281442	0.0819691	0.114315	0.18931	-0.0523723	-0.117274	0.136628	-0.324432
ENSMUST00000027566	Serpinb11	1.99156	0.00271887	0.0129683	-0.0647093	0.15612	0.251378	-0.316987	-0.397037	0.109842	0.248426
ENSMUST00000103122	Tgm2	2.39593	0.0429932	-0.652673	0.829071	0.50517	-0.340658	-0.136168	-0.330494	0.130608	-0.00485569
ENSMUST00000021921	Ptch1	0.768864	0.0108798	0.283492	0.0445745	-0.0993688	0.104895	0.0496929	-0.374514	0.0864769	-0.095249
ENSMUST00000022682	Sorbs3	1.87044	0.000937188	0.0775866	-0.0211022	0.398432	-0.122954	0.0123705	-0.231853	-0.203343	0.0908625
ENSMUST00000035804	Cdo1	1.69616	0.0156305	-0.325051	0.548537	0.370975	-0.2748	-0.31858	-0.286615	-0.0145622	0.300097
ENSMUST00000140523	Slc38a6	1.21151	0.0258467	0.0954852	0.0329933	0.046645	0.137139	-0.110283	-0.0249063	-0.160008	-0.0170649
ENSMUST00000000642	Hk2	2.29605	0.0331608	-0.0144294	-0.316216	0.443241	0.196151	-0.02161	-0.280106	-0.0636396	0.0566103
ENSMUST00000027404	Ptprn	0.670033	0.0451052	0.213777	0.159946	-0.107599	0.0377337	0.00678387	-0.0267818	-0.393565	0.109705
ENSMUST00000023531	Hcls1	3.36322	0.0200376	-0.110759	0.432131	0.58031	-0.61821	-0.189946	0.195317	-0.639215	0.350372
ENSMUST00000035987	Map3k9	0.79841	0.0215549	0.189169	-0.00787028	0.017655	0.0831492	0.00232893	-0.0880804	-0.0815106	-0.11484
ENSMUST00000067784	Cdh24	1.5609	0.00130282	-0.10411	0.125832	0.165351	0.0917181	-0.178772	-0.282618	0.135445	0.0471531
ENSMUST00000099337	Plxnc1	2.32217	0.0485666	0.0464974	0.153787	0.300632	-0.224074	-0.419946	0.0371436	-0.0340862	0.140046
ENSMUST00000046891	Ptger2	3.03222	0.0356639	-0.155556	0.27903	0.131426	0.00912205	-0.327892	0.191599	-0.149143	0.0214145
ENSMUST00000093193	Dock2	4.20737	0.0254405	0.0731742	0.180268	0.030098	-0.0502852	-0.180884	0.227845	0.0353178	-0.315534
ENSMUST00000033427	Sash3	2.35266	0.0332452	-0.0912848	0.266333	0.239248	-0.181604	0.0318095	-0.377749	0.0226974	0.09055
ENSMUST00000023203	Gpt	0.671396	0.0348609	-0.0171144	-0.000209129	0.0595715	0.176909	-0.213337	0.132073	-0.151712	0.0138186
ENSMUST00000043069	Cyth4	2.16222	0.0451052	-0.168173	0.0227138	0.378124	-0.0158228	-0.0355133	-0.176286	0.310207	-0.315249
ENSMUST00000051053	Ubtd2	1.17394	0.0202636	-0.0380789	0.0755288	0.0459637	0.126899	0.10897	-0.153357	0.130737	-0.296663
ENSMUST00000037397	Cep126	0.393099	0.0295358	-0.0365822	0.223142	-0.175183	0.198467	-0.050384	-0.0354937	-0.0148491	-0.109117
ENSMUST00000098657	Cyp2a4	1.65814	0.0174812	0.0209215	-0.0657985	0.211091	0.0313984	-0.000114207	-0.0591277	-0.0640214	-0.0743495
ENSMUST00000112979	Catsperd	1.76022	0.0162878	0.118455	0.0777227	0.059364	-0.0633469	0.0287827	-0.0866783	-0.267722	0.133423
ENSMUST00000045154	Themis2	3.49602	0.0154636	0.0298097	-0.108165	0.445368	-0.18033	0.143358	-0.0546119	-0.0837435	-0.191685
ENSMUST00000056946	Neurl3	1.96631	0.00545968	-0.00935959	0.255595	0.0546677	-0.116613	-0.0221579	-0.067303	0.181132	-0.27596
ENSMUST00000050160	AU021092	2.4944	0.0268861	-0.447981	0.276049	0.560645	-0.209399	-0.336109	-0.135296	-0.0274607	0.319552
ENSMUST00000052072	Tmem221	1.75614	0.0332452	-0.157476	0.124981	0.142984	0.0352485	-0.10801	0.0777585	-0.0309325	-0.0845535
ENSMUST00000043214	Rac2	3.02903	0.0383919	-0.0114867	0.00304874	0.167927	-0.0287214	-0.0986384	0.267799	-0.476773	0.176844
ENSMUST00000058162	Mafg	0.577538	0.0467128	-0.0426539	-0.0985026	0.0336588	0.231437	0.023492	-0.126679	0.250123	-0.270876
ENSMUST00000080953	Lrp2	2.50428	0.00853385	-0.326112	-0.354841	0.296081	0.503137	-0.100763	-0.242009	0.162721	0.0617854
ENSMUST00000038463	Raver2	1.92119	0.0277793	-0.0586907	0.151326	-0.0353694	0.0547582	-0.0626013	-0.213769	0.168397	-0.00405063
ENSMUST00000045726	Rgl3	1.45399	0.0429824	-0.0516588	0.088931	0.0674236	0.000897285	-0.0494252	-0.130527	0.159242	-0.0848837
ENSMUST00000002298	Ppm1j	4.09398	0.0360128	-0.0282479	0.166642	-0.0260665	-0.00677483	-0.164489	-0.156355	0.140194	0.0750971
ENSMUST00000118605	Inpp5f	1.17806	0.0438388	0.298258	0.0116911	-0.231987	0.0243395	0.056249	-0.0632419	0.020762	-0.116071
ENSMUST00000129826	Dhps	1.61392	0.0429443	-0.00144113	0.0745212	-0.0353716	0.025026	-0.0801241	0.0719516	-0.234501	0.179939
ENSMUST00000051241	Zfp36	1.8027	0.0251652	0.119219	0.157255	0.114797	-0.331403	-0.0168232	-0.156863	0.0366876	0.0771307
ENSMUST00000045902	Fmo2	2.02039	0.0148148	-0.750774	0.379664	-0.0297579	0.454645	-0.167244	-0.169584	0.0352417	0.247809

## Sheet: RNA-seq vs RiboTag
The differentially expressed transcripts when compare RNA-seq vs RiboTag. The Transcripts Per Kilobase Million (TPM) values from each sample were also provided
TranscriptID	mOSN_WT1	mOSN_WT2	mOSN_WT3	mOSN_WT4	mOSNribo_WT1	mOSNribo_WT2	mOSNribo_WT3	mOSN_KO1	mOSN_KO2	mOSN_KO3	mOSN_KO4	mOSNribo_KO1	mOSNribo_KO2	mOSNribo_KO4	mOSN_WT_RNA_categories	mOSNribo_WT_categories	mOSN_KO_RNA_categories	mOSNribo_KO_categories
ENSMUST00000090178	643.775	529.051	776.443	498.865	1140.93	1176.19	994.973	650.513	498.601	503.192	559.776	993.153	1073.46	1266.72	high	high	high	high
ENSMUST00000003501	1852.04	1736.73	2195.55	2043.45	1119.97	1127.77	922.27	1900.23	1670.04	1577.13	1887.29	1017.62	1033.76	1006.91	high	high	high	high
ENSMUST00000023750	2095.44	2099.81	2811.98	2478.94	1184.86	1143.85	999.602	2155.22	1886.15	1688.77	2376.4	1064.49	1070.28	780.904	high	high	high	high
ENSMUST00000038489	980.726	899.51	1054.49	971.475	974.866	967.295	906.477	987.217	752.642	750.567	902.506	945.693	946.723	713.655	high	high	high	high
ENSMUST00000025989	574.799	549.132	713.488	605.701	946.794	872.406	873.257	579.857	531.788	522.895	608.737	852.09	917.976	790.459	high	high	high	high
ENSMUST00000130491	771.42	707.724	967.931	994.109	849.271	852.034	700.756	804.063	721.826	679.888	808.117	773.575	816.332	937.82	high	high	high	high
ENSMUST00000028241	2016.55	2053.92	4057.96	4133.07	931.482	879.733	734.93	2021.01	1954.5	1596.2	2451.61	774.161	822.049	868.366	high	high	high	high
ENSMUST00000096753	932.364	922.049	853.388	681.753	965.205	891.348	879.383	904.324	846.673	806.859	901.497	901.748	908.288	626.561	high	high	high	high
ENSMUST00000031229	1243.15	1244.15	1564.25	1565.41	927.107	878.124	817.027	1202.74	1068.32	997.941	1279.06	802.872	852.543	766.94	high	high	high	high
ENSMUST00000017783	1600.32	1478.15	1273.09	1146.21	924.008	848.818	937.383	1601.42	1368.58	1313.18	1612.7	934.414	928.3	542.775	high	high	high	high
ENSMUST00000042990	531.194	517.167	761.579	743.319	895.936	866.152	771.962	521.832	507.688	490.37	549.681	758.634	843.172	789.724	high	high	high	high
ENSMUST00000098281	1576.53	1635.92	3290.27	3470.33	761.227	754.108	576.044	1569.05	1540.84	1241.56	1949.88	621.673	668.789	1095.1	high	high	high	high
ENSMUST00000023291	2066.1	2059.65	2300.48	2169.3	1039.76	943.886	940.786	2125.22	1833.21	1627.48	2098.28	968.251	936.717	475.525	high	high	high	high
ENSMUST00000021864	409.495	355.706	431.066	389.314	776.539	809.862	757.122	392.755	362.296	397.488	382.101	741.789	803.785	792.296	high	high	high	high
ENSMUST00000069614	1393.39	1318.74	1726.01	1360.79	854.557	788.597	810.901	1360.63	1146.94	1068.31	1317.42	801.407	807.12	725.782	high	high	high	high
ENSMUST00000064762	2374.12	2582.56	3391.69	2855.57	774.898	766.438	829.689	3034.68	2483.13	2042.17	2024.58	895.742	829.514	599.367	high	high	high	high
ENSMUST00000115366	1036.22	963.029	1333.42	836.573	888.098	766.08	795.38	1018.01	921.345	716.166	809.126	795.694	816.173	641.26	high	high	high	high
ENSMUST00000060125	1642.34	1638.38	1524.91	1305.56	866.953	776.445	955.082	1676.02	1383.6	1334.76	1709.11	856.045	843.172	508.966	high	high	high	high
ENSMUST00000111178	1439.38	1397.42	1262.59	946.124	842.708	748.211	849.022	1539.44	1337.77	1283.16	1650.56	807.999	796.321	523.298	high	high	high	high
ENSMUST00000099276	892.722	854.023	1072.86	1210.5	721.671	689.598	596.058	932.35	843.513	806.859	964.087	631.927	673.712	764	high	high	high	high
ENSMUST00000033915	683.813	583.145	739.719	847.437	768.336	711.935	635.814	730.643	538.9	473.482	605.709	659.319	686.418	716.595	high	high	high	high
ENSMUST00000087435	463.01	385.622	618.182	437.299	732.243	681.02	730.573	438.939	365.456	381.225	389.168	672.502	738.669	645.303	high	high	high	high
ENSMUST00000028583	447.947	391.769	659.277	614.754	813.543	783.772	676.386	494.99	372.568	390.607	367.463	699.748	764.557	566.294	high	high	high	high
ENSMUST00000107596	692.93	592.161	531.619	412.854	721.671	696.209	592.11	610.646	541.665	543.223	639.528	619.622	619.396	786.417	high	high	high	high
ENSMUST00000017851	707.994	712.232	949.569	817.56	725.134	708.718	639.081	641.829	623.449	600.453	691.013	660.784	693.723	658.165	high	high	high	high
ENSMUST00000025515	515.733	465.942	770.323	824.803	742.633	702.285	660.593	597.225	437.362	396.237	413.901	648.186	716.276	606.349	high	high	high	high
ENSMUST00000035497	815.818	789.274	867.378	747.845	743.727	730.877	637.856	825.773	707.602	608.897	775.812	698.43	668.947	596.427	high	high	high	high
ENSMUST00000094053	355.979	316.775	381.227	204.616	570.555	497.854	490.407	346.177	338.195	261.76	351.311	393.306	516.481	1038.88	high	high	high	high
ENSMUST00000027863	1276.85	1235.14	2054.78	1939.33	733.884	699.783	594.561	1292.34	1201.86	1040.16	1429.98	625.188	661.324	633.543	high	high	high	high
ENSMUST00000028052	641.793	570.851	863.006	874.599	729.144	697.282	760.662	786.3	546.802	526.96	542.109	676.75	704.682	532.485	high	high	high	high
ENSMUST00000109627	429.712	386.441	395.217	323.221	616.127	630.27	482.238	426.702	363.481	414.375	477.5	501.411	563.332	846.317	high	high	high	high
ENSMUST00000037748	254.894	242.601	477.408	327.748	585.138	577.196	482.238	255.784	240.213	199.838	272.569	497.748	560.95	840.069	high	high	high	high
ENSMUST00000036570	407.909	398.325	462.543	488.001	664.25	643.493	584.486	448.807	336.22	365.901	419.453	592.523	646.872	644.568	high	high	high	high
ENSMUST00000013807	366.682	340.953	471.287	317.789	671.177	607.932	704.296	406.966	333.849	321.18	357.873	615.667	688.006	565.191	high	high	high	high
ENSMUST00000062684	726.625	662.646	827.157	657.307	705.447	689.955	757.803	804.458	627.004	702.405	816.193	694.182	746.292	428.119	high	high	high	high
ENSMUST00000026985	1324.02	1223.66	1217.13	913.53	657.688	650.999	633.499	1336.95	1103.88	1058.92	1311.86	660.344	640.201	567.396	high	high	high	high
ENSMUST00000029256	503.841	484.793	670.644	618.376	623.601	637.775	538.195	478.412	450.005	430.325	480.529	567.767	610.343	685.726	high	high	high	high
ENSMUST00000070524	763.888	756.49	790.433	790.398	769.612	747.675	717.503	794.195	653.08	632.978	755.622	725.969	744.228	388.799	high	high	high	high
ENSMUST00000066060	245.38	125.809	142.523	180.171	676.464	557.539	412.394	206.049	196.754	148.862	107.513	541.4	487.893	820.225	high	high	high	high
ENSMUST00000001950	1002.53	1022.04	1223.25	1071.97	683.39	659.219	634.18	1083.93	900.01	868.781	1175.08	627.386	667.518	541.305	high	high	high	high
ENSMUST00000006020	1651.85	1683.46	2756.9	2821.17	718.389	656.002	637.856	1679.18	1504.89	1307.86	1888.8	660.93	638.772	527.34	high	high	high	high
ENSMUST00000115781	71.7508	77.862	134.653	92.349	583.862	589.526	452.285	78.5511	69.1404	79.7477	67.6375	509.028	575.085	724.679	high	high	high	high
ENSMUST00000084820	1005.7	1001.55	862.132	662.74	632.533	557.897	622.879	928.797	842.722	735.868	877.268	647.161	633.848	511.906	high	high	high	high
ENSMUST00000041769	647.739	599.127	589.327	518.784	641.829	604.537	612.124	613.804	561.815	519.142	591.576	611.273	612.408	568.866	high	high	high	high
ENSMUST00000060989	525.247	545.853	633.046	457.218	681.568	592.207	651.607	491.438	461.463	520.08	428.034	580.951	609.867	593.12	high	high	high	high
ENSMUST00000090781	1564.25	1601.09	2735.04	2814.83	801.147	731.592	641.396	1595.49	1502.52	1222.17	1746.46	686.858	707.064	388.064	high	high	high	high
ENSMUST00000107924	871.712	765.506	1284.45	1203.25	693.234	658.325	541.599	865.246	726.962	669.568	829.316	585.199	622.572	572.908	high	high	high	high
ENSMUST00000079063	128.438	104.089	195.86	238.115	463.007	469.441	387.887	91.1824	322.392	285.841	105.999	370.894	444.218	964.279	high	high	high	high
ENSMUST00000024956	407.909	373.328	506.262	449.069	626.699	580.234	524.036	408.544	340.961	414.688	387.149	537.299	571.115	638.688	high	high	high	high
ENSMUST00000022446	1283.19	1217.11	1322.93	1544.58	715.108	637.06	662.363	1308.53	1126.79	1098.02	1288.14	664.446	654.495	413.053	high	high	high	high
ENSMUST00000043961	415.044	398.325	657.528	439.11	719.119	605.431	658.006	472.491	380.47	368.403	374.025	645.403	701.505	363.075	high	high	high	high
ENSMUST00000006235	1277.64	1296.2	1734.76	1650.51	703.077	653.5	672.029	1296.29	1177.76	1073.31	1390.61	675.725	656.718	370.792	high	high	high	high
ENSMUST00000084828	908.579	908.526	1364.9	1257.58	697.791	599.712	691.635	1036.16	798.868	710.224	799.031	630.315	644.33	424.445	high	high	high	high
ENSMUST00000044113	404.341	406.521	363.739	249.885	616.127	551.285	685.78	413.676	389.952	430.95	414.406	503.022	638.454	550.124	high	high	high	high
ENSMUST00000067476	623.558	628.633	752.835	850.154	692.687	615.616	570.735	621.303	472.13	506.632	593.595	597.357	620.349	471.115	high	high	high	high
ENSMUST00000028981	328.626	304.071	403.086	337.707	640.736	621.513	519.543	348.546	327.133	306.169	276.102	579.925	594.62	512.273	high	high	high	high
ENSMUST00000025774	1156.73	1226.53	1332.54	1329.1	631.439	569.87	600.279	1098.14	1032.76	958.536	1161.95	595.745	573.02	513.008	high	high	high	high
ENSMUST00000005406	1700.61	1721.98	2635.36	2520.58	677.193	595.066	699.667	1680.76	1558.23	1386.36	1866.09	668.547	641.948	366.749	high	high	high	high
ENSMUST00000167549	1659.39	1599.45	2108.11	2143.94	621.049	571.12	623.833	1679.18	1394.66	1333.82	1706.08	627.093	584.773	464.868	high	high	high	high
ENSMUST00000022871	474.11	456.107	599.82	471.704	659.693	662.793	596.194	457.886	361.505	408.746	440.148	567.914	634.801	469.278	high	high	high	high
ENSMUST00000021610	1316.49	1355.62	2522.57	2426.42	639.642	612.042	504.158	1315.63	1254.01	1027.96	1564.24	537.738	569.05	565.191	high	high	high	high
ENSMUST00000063988	175.215	143.43	147.769	120.416	557.795	548.962	448.473	189.47	153.294	170.128	180.703	525.873	562.062	583.198	high	high	high	high
ENSMUST00000028944	565.285	572.9	575.337	446.353	639.824	599.355	515.05	607.093	512.034	458.158	537.567	540.814	583.979	546.082	high	high	high	high
ENSMUST00000007980	398.792	333.167	472.161	435.489	625.97	626.16	492.585	386.44	371.383	387.793	350.806	523.529	564.127	579.89	high	high	high	high
ENSMUST00000029344	674.695	623.305	758.081	771.385	625.97	587.918	583.805	648.54	574.458	543.535	638.013	568.939	592.396	499.044	high	high	high	high
ENSMUST00000089622	187.9	198.343	189.739	107.74	565.998	529.305	613.621	172.891	192.408	239.869	232.188	498.188	548.403	612.597	high	high	high	high
ENSMUST00000160583	110.203	91.7951	147.769	79.6736	424.362	423.515	391.972	101.051	102.328	100.076	92.3706	341.158	405.307	908.054	high	high	high	high
ENSMUST00000048967	912.939	968.357	1444.46	1421.45	607.742	570.763	508.379	891.693	846.278	763.389	991.344	524.701	542.21	577.686	high	high	high	high
ENSMUST00000041987	476.489	457.337	418.825	407.422	691.593	577.911	681.423	501.306	468.969	427.197	462.358	610.687	624.002	409.01	high	high	high	high
ENSMUST00000041369	334.573	320.054	391.719	308.735	514.411	513.043	479.651	376.966	301.847	364.025	411.377	449.116	524.581	669.924	high	high	high	high
ENSMUST00000001547	355.583	336.036	266.684	236.305	429.466	434.773	478.017	133.813	619.103	526.648	154.456	402.095	438.977	790.459	high	high	high	high
ENSMUST00000031866	579.952	541.345	638.292	632.862	584.956	560.935	555.758	618.146	549.962	559.798	580.471	565.716	578.42	485.814	high	high	high	high
ENSMUST00000015100	239.83	257.354	439.81	426.435	619.043	617.582	519.543	266.047	250.881	234.239	246.322	545.648	584.297	498.309	high	high	high	high
ENSMUST00000027438	216.442	221.702	257.94	221.819	535.374	518.583	489.862	203.285	190.827	201.715	215.531	533.49	541.415	551.227	high	high	high	high
ENSMUST00000027252	210.892	226.209	243.076	162.969	431.836	479.984	379.446	202.101	235.867	234.552	237.741	384.078	463.594	774.657	high	high	high	high
ENSMUST00000043237	592.241	691.742	654.031	349.477	529.541	575.052	670.804	740.117	681.527	876.599	1220.5	527.338	612.725	479.567	high	high	high	high
ENSMUST00000106739	1057.23	1018.76	934.705	722.495	632.533	564.509	675.161	1072.87	891.318	898.178	1161.95	628.118	610.661	371.894	high	high	high	high
ENSMUST00000179343	676.281	591.751	741.468	542.324	686.489	582.557	705.794	703.012	574.458	502.254	605.709	635.735	658.465	313.097	high	high	high	high
ENSMUST00000001419	346.861	374.557	416.202	447.259	463.189	499.462	370.596	357.23	316.465	320.867	350.302	407.369	435.324	762.163	high	high	high	high
ENSMUST00000038730	1677.22	1638.38	2334.58	2584.87	666.073	565.759	599.734	1679.57	1479.6	1262.2	1789.36	605.853	563.65	433.264	high	high	high	high
ENSMUST00000047864	1761.26	1863.36	2831.22	2995	621.96	566.832	625.875	1781.02	1767.62	1509.89	2056.38	610.833	574.767	412.318	high	high	high	high
ENSMUST00000054836	540.311	404.063	320.895	237.21	415.065	334.702	345.953	660.382	512.429	442.522	589.052	472.7	433.577	691.606	high	high	high	high
ENSMUST00000169681	759.924	771.243	758.956	814.844	529.906	517.511	556.984	736.564	743.555	779.651	854.554	514.887	519.975	562.986	high	high	high	high
ENSMUST00000048128	326.644	255.715	278.051	191.036	482.329	471.228	424.511	330.388	278.142	277.71	278.121	428.316	453.429	715.86	high	high	high	high
ENSMUST00000032413	376.592	328.659	415.327	365.774	682.479	595.602	670.668	421.965	359.53	358.083	359.387	602.484	659.259	331.103	high	high	high	high
ENSMUST00000033933	1116.7	1161.37	1967.34	2146.66	624.33	606.503	482.783	1126.16	1062.79	900.054	1298.74	515.18	545.227	529.178	high	high	high	high
ENSMUST00000019268	1263.76	1227.76	1252.1	1219.55	675.005	605.431	686.597	1273	1031.97	952.907	1266.44	695.207	635.595	253.197	high	high	high	high
ENSMUST00000102484	219.613	199.163	190.613	145.766	530.999	512.329	477.881	234.469	222.434	258.945	245.817	508.442	540.78	528.81	high	high	high	high
ENSMUST00000030698	486.002	420.455	577.96	481.663	572.196	580.591	497.623	427.097	387.976	384.353	457.31	490.278	532.68	551.594	high	high	high	high
ENSMUST00000006828	1528.57	1565.03	2644.1	2736.06	750.107	696.745	608.039	1540.23	1467.36	1233.74	1809.56	638.665	664.977	269.734	high	high	high	high
ENSMUST00000022623	625.143	659.778	646.162	762.332	591.336	546.639	500.754	622.882	550.357	533.215	621.356	533.49	531.41	495.737	high	high	high	high
ENSMUST00000092584	139.934	111.466	174	218.197	485.063	441.207	388.568	117.235	227.571	228.61	168.084	405.318	468.2	686.461	high	high	high	high
ENSMUST00000000804	604.926	647.484	940.825	780.439	622.142	584.88	562.702	669.066	582.36	538.844	681.927	543.891	578.579	436.572	high	high	high	high
ENSMUST00000031009	1099.65	1114.66	1934.11	2075.14	549.228	531.271	423.422	1085.5	1039.48	867.217	1263.41	453.511	485.352	616.271	high	high	high	high
ENSMUST00000031273	883.605	814.272	944.323	898.139	586.779	527.161	556.711	815.115	723.011	678.95	860.107	539.203	550.15	462.663	high	high	high	high
ENSMUST00000061030	1119.87	1148.67	1588.74	1771.83	649.668	620.62	558.209	1156.16	1041.45	903.807	1229.08	584.32	598.59	368.954	high	high	high	high
ENSMUST00000179802	1089.34	912.624	960.936	856.491	588.602	510.899	653.241	1121.82	1035.92	1059.24	1083.21	558.099	566.985	426.649	high	high	high	high
ENSMUST00000036125	830.089	805.666	891.86	985.961	653.313	634.022	531.388	833.668	765.68	713.664	877.268	560.443	584.932	404.968	high	high	high	high
ENSMUST00000077925	1139.69	1025.73	671.518	565.864	642.194	598.461	551.81	1175.11	845.488	806.546	964.087	603.655	576.038	369.322	high	high	high	high
ENSMUST00000022927	801.151	760.588	835.9	902.666	617.95	552.357	590.612	814.326	675.6	656.746	707.165	563.519	579.85	404.968	high	high	high	high
ENSMUST00000020268	412.666	504.054	626.051	560.431	467.017	469.977	459.093	438.544	427.485	398.738	450.244	463.032	473.441	610.392	high	high	high	high
ENSMUST00000015498	810.665	811.404	1181.28	1190.58	592.794	598.461	635.814	788.274	679.156	669.881	839.916	547.846	579.85	417.83	high	high	high	high
ENSMUST00000024708	853.477	797.47	796.554	655.497	587.69	537.704	549.768	834.852	686.268	719.293	858.088	564.252	574.609	399.088	high	high	high	high
ENSMUST00000020107	508.202	438.896	533.367	417.381	552.874	497.139	639.081	469.333	397.853	395.298	436.615	500.239	555.709	481.405	high	high	high	high
ENSMUST00000100528	419.009	413.898	325.267	354.91	514.776	532.879	497.078	432.623	367.037	416.252	497.186	507.856	529.186	499.411	high	high	high	high
ENSMUST00000064392	429.315	521.675	356.744	493.433	585.503	637.06	618.523	406.966	587.496	463.162	534.033	593.402	549.833	391.738	high	high	high	high
ENSMUST00000035155	1348.2	1218.33	1265.22	1081.93	647.845	609.541	609.128	1409.18	1137.85	1065.18	1314.39	652.141	641.63	241.07	high	high	high	high
ENSMUST00000066652	882.812	941.31	988.916	686.28	634.173	557.182	644.119	943.008	820.993	722.733	798.021	617.718	607.802	304.277	high	high	high	high
ENSMUST00000029307	1094.5	1115.07	2230.53	2211.85	549.775	539.312	411.849	1082.74	1048.17	862.526	1345.18	443.55	480.429	604.879	high	high	high	high
ENSMUST00000051301	202.567	170.477	227.337	167.496	587.508	546.281	563.246	181.97	177.79	173.256	165.056	503.461	576.197	445.759	high	high	high	high
ENSMUST00000069168	125.267	109.417	293.789	196.468	465.559	458.719	436.492	166.97	164.752	130.098	104.99	410.591	472.011	641.995	high	high	high	high
ENSMUST00000058162	324.266	280.713	240.453	170.212	432.383	470.871	443.436	389.598	331.084	389.044	425.006	419.234	467.406	637.218	high	high	high	high
ENSMUST00000021567	321.491	277.844	241.327	231.778	414.701	415.831	367.193	389.203	315.675	328.06	347.273	445.747	509.016	564.089	high	high	high	high
ENSMUST00000088652	357.961	379.475	384.724	372.112	533.551	542.529	415.934	347.756	315.675	307.732	338.187	458.638	488.529	565.559	high	high	high	high
ENSMUST00000049031	321.491	298.334	381.227	313.262	535.921	537.525	573.866	361.572	309.354	312.111	313.454	505.512	557.139	448.699	high	high	high	high
ENSMUST00000048308	663.199	645.435	631.297	617.47	533.551	523.765	454.055	560.515	487.143	488.494	627.413	505.073	520.451	483.242	high	high	high	high
ENSMUST00000085177	89.1929	70.8954	115.417	60.6606	435.481	449.427	352.489	78.1563	66.7698	81.9368	85.8088	375.435	422.142	711.082	high	high	high	high
ENSMUST00000052919	991.033	924.508	1181.28	1148.02	620.319	613.293	481.285	957.613	831.66	728.362	1043.33	522.065	552.215	432.162	high	high	high	high
ENSMUST00000037947	211.685	199.163	216.844	181.982	493.631	500.535	421.924	217.101	236.263	291.157	237.741	401.509	485.193	618.476	high	high	high	high
ENSMUST00000050063	229.92	216.374	237.829	284.29	529.176	549.141	487.276	236.837	252.461	258.007	288.216	485.444	543.798	471.85	high	high	high	high
ENSMUST00000078525	781.33	651.991	508.885	339.518	543.212	506.432	578.904	716.828	625.029	560.423	646.089	517.817	544.592	432.162	high	high	high	high
ENSMUST00000062264	80.0754	77.862	129.407	66.9983	492.537	482.129	400.821	80.9194	87.3144	105.392	82.7802	407.076	461.37	623.989	high	high	high	high
ENSMUST00000070198	137.555	143.84	235.206	162.969	436.575	457.826	338.329	178.023	128.404	169.19	144.865	387.3	435.165	669.924	high	high	high	high
ENSMUST00000172812	491.949	482.334	612.061	363.058	326.839	306.825	443.3	492.622	515.985	403.43	469.929	332.955	374.337	780.537	high	high	high	high
ENSMUST00000020315	325.455	361.443	358.493	366.68	489.256	457.647	457.459	316.967	299.872	292.721	283.169	478.266	491.228	518.153	high	high	high	high
ENSMUST00000067530	586.691	568.392	528.121	536.891	501.287	505.359	462.36	640.25	510.454	532.277	596.118	504.926	484.558	494.634	high	high	high	high
ENSMUST00000048915	313.563	315.136	328.764	337.707	473.944	524.659	395.239	314.599	281.303	279.586	310.931	433.882	449.3	597.162	high	high	high	high
ENSMUST00000054697	278.282	258.993	349.749	281.574	516.781	499.105	463.722	305.126	243.769	239.243	269.54	484.126	502.187	491.327	high	high	high	high
ENSMUST00000071782	639.811	639.697	593.699	564.053	504.568	531.449	511.918	741.696	574.458	617.966	793.479	512.983	513.622	450.536	high	high	high	high
ENSMUST00000041415	1254.65	1240.05	1225	1071.07	527.171	491.421	507.153	1361.81	1081.75	1077.69	1378.49	556.049	511.081	409.378	high	high	high	high
ENSMUST00000167055	1396.17	1373.65	1870.28	1623.35	570.373	503.036	540.373	1462.47	1322.36	1094.26	1613.71	558.392	549.515	366.015	high	high	high	high
ENSMUST00000107359	699.273	655.68	771.197	705.293	582.586	537.346	594.016	727.88	600.929	588.257	644.07	574.212	579.373	317.139	high	high	high	high
ENSMUST00000002259	729.004	720.838	1171.66	1021.27	555.608	526.446	428.732	744.459	640.437	599.515	802.564	455.122	494.246	520.725	high	high	high	high
ENSMUST00000115096	893.119	820.009	698.624	406.516	524.072	466.224	501.571	908.271	790.176	671.444	703.127	502.729	486.464	476.995	high	high	high	high
ENSMUST00000069511	945.049	908.936	1168.16	964.232	584.956	514.294	643.438	988.401	832.845	713.664	747.041	585.931	622.89	252.462	high	high	high	high
ENSMUST00000054014	1277.64	1228.99	1342.16	1202.35	541.39	493.387	587.345	1303	1269.42	1169.63	1462.79	529.096	542.21	389.166	high	high	high	high
ENSMUST00000018727	457.064	427.831	449.428	467.177	497.459	497.139	456.914	435.781	408.916	418.128	408.853	454.243	490.276	513.743	high	high	high	high
ENSMUST00000034846	1048.12	1023.27	846.393	772.291	507.484	453.894	454.464	939.455	793.732	819.056	956.515	456.44	442.471	558.576	high	high	high	high
ENSMUST00000030039	899.065	876.152	846.393	708.009	596.258	546.639	563.927	854.983	695.355	677.074	760.669	595.892	569.209	291.415	high	high	high	high
ENSMUST00000054960	187.107	157.773	161.759	123.132	507.302	526.803	428.459	217.89	190.432	225.17	225.627	444.136	498.693	510.803	high	high	high	high
ENSMUST00000041055	412.27	371.279	302.533	236.305	417.253	404.752	374.272	479.99	353.209	315.863	374.53	428.169	376.402	646.773	high	high	high	high
ENSMUST00000167004	494.724	524.134	437.186	459.029	470.48	470.156	420.018	479.99	418.003	414.063	472.958	459.37	455.335	535.425	high	high	high	high
ENSMUST00000043951	855.856	881.889	1067.61	1073.78	634.538	610.255	512.735	911.034	820.202	745.563	969.639	557.513	587.155	301.705	high	high	high	high
ENSMUST00000038364	682.623	703.626	1419.98	1293.79	482.147	476.768	364.061	676.171	591.447	546.975	751.584	393.306	424.366	625.091	high	high	high	high
ENSMUST00000115151	199.396	189.327	200.231	209.143	556.519	535.202	584.213	178.023	192.803	200.464	199.379	504.047	567.303	367.117	high	high	high	high
ENSMUST00000035824	989.447	966.308	1084.22	908.098	537.744	508.576	527.439	948.139	813.881	819.681	1005.98	505.951	502.981	428.119	high	high	high	high
ENSMUST00000171797	254.894	242.601	371.608	349.477	478.319	489.991	365.423	256.969	228.756	227.672	234.207	390.377	443.424	597.162	high	high	high	high
ENSMUST00000021381	462.218	436.847	494.021	396.557	448.424	444.066	475.431	458.28	415.632	352.766	473.967	388.179	464.706	577.318	high	high	high	high
ENSMUST00000033598	474.506	451.19	938.202	895.423	550.139	516.975	487.276	549.068	471.34	448.776	411.377	504.926	515.369	406.805	high	high	high	high
ENSMUST00000047935	771.023	803.617	908.473	830.235	578.394	539.491	529.073	757.485	647.154	639.545	798.021	540.961	561.268	324.121	high	high	high	high
ENSMUST00000048377	404.738	378.655	462.543	470.799	492.355	429.591	467.67	473.28	352.813	345.573	370.492	470.503	479.317	471.115	high	high	high	high
ENSMUST00000162280	559.339	482.744	333.136	240.832	523.161	512.507	493.538	515.516	436.572	423.757	515.357	563.666	532.839	324.121	high	high	high	high
ENSMUST00000029385	470.939	459.795	624.302	749.656	521.338	498.033	442.074	502.49	419.978	445.649	478.005	461.421	504.093	454.946	high	high	high	high
ENSMUST00000086199	629.108	618.388	781.689	799.452	554.879	556.467	461.135	564.068	556.284	540.095	666.28	468.598	512.669	437.674	high	high	high	high
ENSMUST00000030623	374.214	384.392	448.553	441.826	422.721	413.687	375.089	332.757	310.539	333.689	341.216	373.824	384.978	658.9	high	high	high	high
ENSMUST00000059986	489.967	425.782	440.684	530.554	494.724	457.468	432.68	496.174	402.99	426.572	487.091	449.995	463.594	503.086	high	high	high	high
ENSMUST00000019276	537.14	489.301	541.237	529.648	481.6	437.99	449.018	478.412	480.822	465.664	546.147	456.44	458.512	501.616	high	high	high	high
ENSMUST00000025729	140.727	149.987	211.598	148.483	518.057	488.383	444.661	148.813	156.455	152.928	131.237	431.099	491.07	494.267	high	high	high	high
ENSMUST00000020630	408.305	410.21	533.367	436.394	553.603	555.216	467.534	405.387	387.186	369.967	423.491	486.03	523.945	405.335	high	high	high	high
ENSMUST00000123128	153.015	150.397	244.824	159.347	520.062	453.894	503.886	164.997	124.848	145.422	150.922	460.542	505.522	448.331	high	high	high	high
ENSMUST00000053183	703.237	685.595	563.971	447.259	578.394	547.532	536.017	703.802	613.176	611.712	704.641	576.117	554.597	279.656	high	high	high	high
ENSMUST00000106157	176.404	143.02	183.618	176.549	444.596	451.571	344.592	185.917	135.91	160.434	157.484	364.742	405.148	640.158	high	high	high	high
ENSMUST00000074144	574.799	578.637	520.252	512.446	504.386	470.156	463.994	646.961	536.134	506.007	574.414	496.577	465.659	444.289	high	high	high	high
ENSMUST00000165566	295.328	276.205	416.202	351.288	535.556	464.795	503.886	318.546	270.635	261.76	248.341	508.149	528.551	367.484	high	high	high	high
ENSMUST00000031914	619.197	629.862	646.162	617.47	525.713	540.92	448.746	622.882	512.429	517.578	600.661	482.514	489.005	428.119	high	high	high	high
ENSMUST00000023776	522.076	517.167	488.774	320.505	490.714	466.939	454.872	588.936	482.797	439.707	453.777	536.566	517.751	343.598	high	high	high	high
ENSMUST00000031668	168.079	154.085	173.126	174.739	424.18	426.375	386.39	90.7877	381.26	333.377	100.447	363.277	403.401	629.133	high	high	high	high
ENSMUST00000079746	759.924	733.132	885.74	916.247	526.989	520.906	477.745	722.749	686.663	675.197	790.955	480.024	489.164	426.282	high	high	high	high
ENSMUST00000026243	713.147	638.468	758.956	689.901	518.786	457.647	468.351	766.564	640.437	575.747	657.699	513.569	511.875	369.689	high	high	high	high
ENSMUST00000165123	218.027	199.572	334.885	292.438	468.657	458.719	369.371	236.837	220.459	234.552	233.198	383.785	431.512	579.523	high	high	high	high
ENSMUST00000025110	161.737	204.08	237.829	162.969	454.621	454.43	496.398	256.179	204.26	273.644	250.864	431.538	494.087	468.91	high	high	high	high
ENSMUST00000038014	602.151	592.98	500.141	392.936	503.839	465.867	496.534	624.461	481.217	491.934	560.281	471.089	474.076	448.699	high	high	high	high
ENSMUST00000053336	543.086	507.332	539.488	487.095	488.162	464.795	445.478	599.593	455.141	483.803	564.319	466.548	481.858	445.024	high	high	high	high
ENSMUST00000058438	536.743	520.855	434.563	427.34	545.947	495.531	557.801	527.753	447.239	473.17	532.519	522.504	524.104	343.965	high	high	high	high
ENSMUST00000013970	645.36	656.909	517.629	383.882	420.352	429.949	417.84	666.303	458.697	572.307	663.251	530.121	542.527	316.772	high	high	high	high
ENSMUST00000080210	655.667	567.163	619.056	489.812	550.139	461.757	532.068	749.196	495.835	489.432	585.014	533.49	504.887	338.453	high	high	high	high
ENSMUST00000033910	323.077	287.679	285.92	336.802	470.663	471.943	405.45	274.731	245.745	287.092	296.293	419.82	456.765	494.267	high	high	high	high
ENSMUST00000025083	311.977	273.336	604.192	411.043	504.75	482.665	377.268	318.941	282.488	263.949	261.464	405.318	444.536	520.358	high	high	high	high
ENSMUST00000118317	161.737	153.675	199.357	189.225	488.891	441.743	442.21	195.391	190.432	203.591	172.627	455.854	466.929	446.861	high	high	high	high
ENSMUST00000018470	602.548	626.584	683.76	775.912	535.192	513.58	471.21	598.409	576.038	524.146	620.347	479.438	501.711	385.859	high	high	high	high
ENSMUST00000039413	663.992	611.831	683.76	526.027	492.902	484.094	394.286	682.486	593.422	546.663	753.603	424.068	442.63	498.309	high	high	high	high
ENSMUST00000032710	1016.8	1063.84	1347.41	1286.55	546.858	446.746	587.345	957.613	802.423	723.359	895.44	528.363	502.346	333.676	high	high	high	high
ENSMUST00000074575	475.696	411.029	440.684	384.787	373.14	389.205	322.4	449.202	479.637	411.561	503.243	328.268	370.208	665.882	high	high	high	high
ENSMUST00000153581	609.683	544.624	765.951	614.754	498.37	391.35	533.975	736.564	569.717	585.442	624.89	413.667	457.4	490.959	high	high	high	high
ENSMUST00000036493	1711.71	1792.05	3007.84	2839.28	538.655	480.699	580.129	1747.07	1672.01	1385.42	2020.04	550.336	499.805	309.054	high	high	high	high
ENSMUST00000172450	399.981	392.998	413.578	459.934	556.337	550.57	512.735	416.044	368.617	425.947	404.815	526.752	532.839	296.192	high	high	high	high
ENSMUST00000091288	1020.76	1044.17	1582.61	1559.97	556.702	521.442	480.604	1022.35	903.961	809.986	1097.85	494.379	509.334	349.845	high	high	high	high
ENSMUST00000100023	681.83	617.158	624.302	660.023	470.298	424.23	430.365	688.407	472.525	490.37	625.394	441.353	436.436	475.525	high	high	high	high
ENSMUST00000034441	470.146	510.201	522.875	510.635	483.058	524.659	434.722	474.859	376.914	392.796	473.462	457.759	490.276	403.13	high	high	high	high
ENSMUST00000081265	386.106	330.299	463.418	451.786	502.745	483.379	418.929	402.624	357.159	344.635	372.006	465.229	495.675	389.901	high	high	high	high
ENSMUST00000028999	1025.12	983.929	1350.03	1425.98	534.28	478.019	520.36	1133.27	871.169	793.724	1013.05	512.25	526.01	312.362	high	high	high	high
ENSMUST00000061372	489.174	484.793	542.111	614.754	528.812	517.332	493.266	454.728	406.545	439.707	463.872	474.604	509.016	365.647	high	high	high	high
ENSMUST00000032143	753.581	781.078	952.192	954.273	442.408	425.481	449.562	735.38	688.638	631.727	792.469	441.06	429.924	476.995	high	high	high	high
ENSMUST00000110336	691.741	731.083	810.544	611.133	473.944	427.089	494.355	779.195	687.453	602.955	676.375	476.069	457.4	407.173	high	high	high	high
ENSMUST00000020285	442.397	407.751	457.297	473.515	495.818	484.452	445.206	464.991	370.592	409.684	451.758	447.065	467.247	425.179	high	high	high	high
ENSMUST00000024854	411.477	377.016	355.87	382.977	426.914	421.371	399.46	471.701	344.912	299.601	357.873	426.411	414.36	489.122	high	high	high	high
ENSMUST00000094815	729.796	743.377	837.649	857.397	519.515	493.565	423.967	734.591	633.326	591.071	755.622	454.536	467.406	407.908	high	high	high	high
ENSMUST00000155901	75.3185	58.1916	91.8092	91.4436	455.533	424.052	371.413	86.0509	76.252	81.6241	63.0947	401.656	458.035	470.013	high	high	high	high
ENSMUST00000043338	600.169	498.726	428.443	428.246	466.835	443.887	484.961	651.698	528.232	560.736	550.186	465.962	486.305	376.672	high	high	high	high
ENSMUST00000033313	334.969	355.706	495.769	441.826	471.574	472.836	380.671	329.204	308.564	299.601	331.626	402.681	439.453	486.549	high	high	high	high
ENSMUST00000105502	332.194	290.548	303.407	252.602	492.355	447.64	473.388	367.887	286.439	301.478	316.483	459.077	452.159	417.095	high	high	high	high
ENSMUST00000041374	808.683	796.241	1400.75	1457.66	531.728	415.295	437.037	882.614	723.011	594.199	710.698	488.374	460.259	378.876	high	high	high	high
ENSMUST00000053577	520.49	546.263	752.835	744.224	452.434	435.488	378.629	487.885	550.752	506.945	565.328	398.433	421.189	504.189	high	high	high	high
ENSMUST00000009617	1506.37	1451.51	1673.55	1432.31	481.235	436.56	450.243	1535.1	1243.74	1146.49	1574.34	467.866	448.03	407.908	high	high	high	high
ENSMUST00000028087	90.3822	99.9911	110.171	90.5382	348.166	368.476	321.719	103.419	98.3769	99.7628	87.323	275.534	355.756	691.606	high	high	high	high
ENSMUST00000121469	525.247	535.198	575.337	399.273	434.388	413.33	485.914	553.805	459.487	474.108	585.014	433.003	471.058	418.565	high	high	high	high
ENSMUST00000170489	602.151	570.441	721.358	659.118	464.465	398.14	466.036	630.777	613.967	579.813	612.775	430.659	416.901	473.687	high	high	high	high
ENSMUST00000082365	793.223	821.239	931.207	1083.74	469.204	451.035	434.45	824.589	722.616	688.019	842.44	447.358	432.942	439.144	high	high	high	high
ENSMUST00000000137	282.643	270.878	351.498	290.628	523.343	493.744	459.91	286.968	283.673	316.176	291.245	445.894	501.869	371.527	high	high	high	high
ENSMUST00000100024	786.88	786.406	1165.54	1027.61	562.535	528.233	534.655	823.799	673.23	613.275	751.584	552.826	548.721	216.816	high	high	high	high
ENSMUST00000055125	788.862	737.64	790.433	707.103	490.35	485.345	425.328	800.51	661.377	605.144	756.127	489.106	470.582	358.297	high	high	high	high
ENSMUST00000099329	522.869	502.005	572.714	594.836	446.783	453.894	442.483	569.594	502.947	485.992	592.08	453.804	461.212	400.558	high	high	high	high
ENSMUST00000044250	299.688	254.076	230.834	187.414	417.253	445.138	430.638	294.863	263.524	299.288	316.483	420.699	451.841	442.819	high	high	high	high
ENSMUST00000032888	532.779	534.789	593.699	690.806	535.01	503.215	454.328	528.937	509.663	508.822	586.528	470.21	495.993	349.11	high	high	high	high
ENSMUST00000043059	1025.92	1099.9	1284.45	907.193	513.864	533.951	613.485	1081.56	879.07	990.122	1244.73	481.196	524.263	309.054	high	high	high	high
ENSMUST00000028102	252.515	248.748	299.91	333.181	491.261	431.378	433.769	300.389	309.749	329.624	251.874	444.722	476.617	392.106	high	high	high	high
ENSMUST00000023749	780.141	795.012	1364.9	1354.45	431.836	424.945	323.217	776.827	753.433	626.723	933.801	347.311	375.926	589.445	high	high	high	high
ENSMUST00000033824	962.491	969.176	1352.65	1390.67	481.417	454.073	427.643	933.534	884.602	794.35	1040.3	447.358	442.63	422.607	high	high	high	high
ENSMUST00000114297	656.46	620.027	628.674	717.062	526.442	493.208	482.102	725.907	579.989	576.685	738.965	511.518	527.439	273.408	high	high	high	high
ENSMUST00000034470	553.393	546.673	419.699	531.459	483.058	456.039	505.792	549.463	461.068	494.123	531.51	486.323	481.223	343.23	high	high	high	high
ENSMUST00000180430	506.616	207.768	205.478	113.173	390.821	454.609	568.965	282.626	317.651	224.544	269.54	398.726	426.43	485.079	high	high	high	high
ENSMUST00000025270	409.495	363.492	375.98	477.136	453.528	435.846	401.91	437.36	382.84	394.36	390.177	449.116	451.841	408.275	high	high	high	high
ENSMUST00000087200	320.302	307.35	224.714	255.318	402.123	436.024	348.54	299.599	267.87	273.644	330.111	356.393	381.484	569.233	high	high	high	high
ENSMUST00000038422	805.115	731.493	632.172	624.714	468.657	415.831	465.9	768.143	628.19	571.682	583.5	443.55	421.666	438.409	high	high	high	high
ENSMUST00000022704	698.083	712.642	1069.36	1234.04	489.256	452.107	411.577	674.987	687.058	624.221	752.593	428.169	438.183	436.939	high	high	high	high
ENSMUST00000005826	1008.47	1092.53	1183.9	1245.81	508.214	468.369	498.848	1072.08	951.767	875.035	1102.89	488.813	459.465	354.99	high	high	high	high
ENSMUST00000021479	537.14	529.461	611.187	714.346	572.743	544.673	526.895	534.068	447.635	436.58	521.919	547.699	527.439	224.9	high	high	high	high
ENSMUST00000060232	340.122	348.33	438.061	449.975	475.767	455.324	403.272	348.546	315.28	320.867	370.492	423.775	446.441	429.222	high	high	high	high
ENSMUST00000084891	1195.19	1141.29	960.061	769.575	479.777	441.207	467.126	1198	1038.29	1059.24	1255.84	500.971	458.353	338.821	high	high	high	high
ENSMUST00000060537	255.29	245.06	396.091	222.724	522.067	489.813	400.141	316.178	259.573	249.563	260.96	421.87	462.641	413.053	high	high	high	high
ENSMUST00000109099	512.166	482.334	402.212	332.275	435.117	440.849	467.262	501.701	383.63	435.641	519.9	459.663	434.53	402.395	high	high	high	high
ENSMUST00000029002	599.377	618.388	775.569	1147.12	524.072	514.294	416.887	601.962	637.672	580.438	646.594	452.192	468.517	375.569	high	high	high	high
ENSMUST00000182010	583.916	647.074	1194.39	1670.43	343.427	335.953	254.87	593.278	588.681	518.516	960.553	276.12	302.075	716.962	high	high	high	high
ENSMUST00000085314	262.822	311.038	357.619	267.993	524.437	456.039	468.351	341.835	248.905	263.324	237.236	496.87	496.152	300.235	high	high	high	high
ENSMUST00000166897	392.053	402.833	446.805	491.622	500.375	482.307	477.609	396.308	355.974	345.261	406.33	458.784	474.235	360.135	high	high	high	high
ENSMUST00000060396	252.515	270.468	310.402	271.615	473.397	452.643	430.365	234.864	219.669	216.413	224.112	437.983	453.747	400.191	high	high	high	high
ENSMUST00000000619	525.644	517.987	536.865	520.595	407.045	376.16	393.197	618.146	488.329	460.973	561.795	401.656	402.29	485.079	high	high	high	high
ENSMUST00000039926	734.95	623.305	610.312	472.609	516.781	472.121	435.811	838.01	666.908	602.017	708.175	474.604	465.341	348.743	high	high	high	high
ENSMUST00000021940	422.973	461.435	376.855	410.138	427.825	434.237	451.741	468.938	400.619	449.714	476.996	452.778	452	381.449	high	high	high	high
ENSMUST00000021062	470.146	427.011	789.559	658.213	400.665	394.566	301.841	449.596	430.646	388.105	474.472	323.727	351.309	610.759	high	high	high	high
ENSMUST00000001479	507.409	470.45	416.202	460.839	532.275	503.394	476.384	509.2	490.699	474.108	540.595	470.356	478.205	333.676	high	high	high	high
ENSMUST00000055843	865.766	862.219	830.654	797.641	428.555	370.442	490.952	904.719	722.616	749.628	910.078	457.026	418.807	405.703	high	high	high	high
ENSMUST00000047835	415.044	403.243	402.212	377.544	479.412	465.867	467.534	438.544	353.999	374.658	352.825	465.376	442.471	372.262	high	high	high	high
ENSMUST00000109605	541.104	569.622	722.232	828.424	415.43	415.474	327.982	638.671	614.757	569.805	740.479	367.965	394.666	515.213	high	high	high	high
ENSMUST00000051431	285.814	313.907	269.307	286.101	343.792	417.618	491.905	305.52	271.03	351.515	390.682	399.019	440.565	438.041	high	high	high	high
ENSMUST00000026917	167.286	177.443	171.377	136.713	393.373	405.467	443.844	206.838	183.321	176.696	187.77	427.437	471.535	375.569	high	high	high	high
ENSMUST00000072334	189.485	176.624	179.246	120.416	380.249	387.954	327.709	247.89	200.31	218.603	227.646	402.974	397.684	473.687	high	high	high	high
ENSMUST00000021273	705.615	687.644	891.86	767.764	495.636	481.592	392.788	725.512	651.105	595.762	802.059	425.972	446.124	397.251	high	high	high	high
ENSMUST00000020608	256.479	277.025	271.056	357.626	366.942	375.446	348.404	257.758	262.338	268.64	305.883	330.612	345.909	592.385	high	high	high	high
ENSMUST00000162415	283.435	326.201	433.689	371.207	393.191	387.418	314.231	319.336	278.932	278.022	339.702	344.235	366.555	557.106	high	high	high	high
ENSMUST00000079597	328.626	324.561	271.93	248.98	447.877	425.481	431.999	378.94	254.041	281.15	303.864	441.499	461.37	362.707	high	high	high	high
ENSMUST00000055322	183.143	190.147	170.503	180.171	478.683	475.517	386.39	308.283	263.524	236.428	200.389	440.767	455.971	367.117	high	high	high	high
ENSMUST00000082390	772.213	760.998	1203.14	1177.9	178.093	198.355	159.702	736.564	770.421	694.587	813.164	179.295	202.336	881.228	high	high	high	high
ENSMUST00000145353	138.745	102.04	158.261	120.416	475.037	410.828	406.131	138.945	119.712	126.658	119.123	402.974	477.57	380.714	high	high	high	high
ENSMUST00000038890	360.339	360.624	387.347	346.761	500.375	440.313	436.356	416.834	338.985	278.648	303.359	426.558	463.117	371.159	high	high	high	high
ENSMUST00000089230	263.218	274.156	262.312	258.034	340.875	345.782	338.057	292.099	284.463	316.489	345.254	378.365	395.46	483.977	high	high	high	high
ENSMUST00000107909	784.105	656.909	837.649	877.315	494.724	429.234	523.627	923.271	780.694	675.197	820.736	503.022	490.117	261.281	high	high	high	high
ENSMUST00000099490	275.111	292.597	239.578	193.752	400.665	377.054	397.145	306.31	311.724	313.049	308.912	384.517	398.637	470.748	high	high	high	high
ENSMUST00000097888	453.893	358.165	279.799	252.602	509.854	468.011	413.211	431.044	364.271	333.064	350.302	481.049	469.47	297.295	high	high	high	high
ENSMUST00000006435	332.987	341.773	343.629	348.572	421.81	426.375	327.846	339.862	301.452	300.539	353.835	349.508	381.008	513.743	high	high	high	high
ENSMUST00000034136	364.7	342.593	366.362	353.099	480.324	461.221	366.376	354.072	293.55	305.543	329.102	404.292	423.889	415.257	high	high	high	high
ENSMUST00000085018	800.358	832.713	1016.9	1014.03	479.412	460.506	401.094	821.826	726.962	620.468	877.268	416.89	428.812	396.516	high	high	high	high
ENSMUST00000112686	127.645	88.9265	127.658	79.6736	459.179	420.478	350.038	117.629	105.093	106.33	97.9229	389.205	424.842	427.384	high	high	high	high
ENSMUST00000066039	339.33	331.118	358.493	326.843	481.6	438.526	439.896	313.415	301.452	277.084	267.017	427.583	455.494	357.195	high	high	high	high
ENSMUST00000003310	379.764	478.646	565.719	592.12	515.14	458.362	503.75	446.438	355.974	333.377	347.778	473.872	492.34	272.673	high	high	high	high
ENSMUST00000036248	172.043	134.414	153.015	105.93	330.302	394.924	321.038	218.285	148.948	166.376	169.094	355.66	389.108	493.164	high	high	high	high
ENSMUST00000084838	246.965	222.521	223.839	177.455	397.748	372.05	356.437	241.969	227.176	243.621	209.979	392.867	414.36	427.017	high	high	high	high
ENSMUST00000040455	332.194	330.299	214.221	220.913	413.06	389.563	419.201	340.651	273.796	304.605	354.844	380.416	377.196	475.157	high	high	high	high
ENSMUST00000067744	137.555	135.644	220.342	197.373	428.008	426.732	420.29	182.76	168.703	188.893	163.037	402.974	454.382	375.202	high	high	high	high
ENSMUST00000044207	508.202	487.662	398.714	323.221	476.678	507.861	507.698	421.571	410.101	406.557	441.663	490.717	476.935	264.589	high	high	high	high
ENSMUST00000107094	513.355	509.381	445.93	521.5	463.007	387.954	429.957	346.572	433.411	386.229	376.044	374.556	414.836	442.819	high	high	high	high
ENSMUST00000075896	449.532	458.156	410.081	490.717	407.774	407.611	371.822	435.781	406.941	402.491	460.339	390.963	426.271	414.522	high	high	high	high
ENSMUST00000022734	253.308	211.866	232.583	191.941	444.049	437.633	475.294	226.18	225.99	242.058	234.207	441.939	471.058	316.037	high	high	high	high
ENSMUST00000072093	589.863	606.913	449.428	334.086	376.238	349.713	376.178	583.804	631.745	597.951	619.337	366.939	359.091	502.719	high	high	high	high
ENSMUST00000029446	773.005	806.486	984.544	1056.58	479.595	449.248	462.905	802.089	724.591	710.224	956.515	442.085	452.794	333.676	high	high	high	high
ENSMUST00000060805	778.952	729.853	679.388	624.714	462.642	421.014	465.356	749.196	695.75	681.765	790.955	448.384	459.623	320.446	high	high	high	high
ENSMUST00000067947	334.969	373.737	516.754	475.326	441.132	380.985	429.957	413.676	327.923	291.783	315.473	430.952	444.853	352.05	high	high	high	high
ENSMUST00000171975	197.414	213.096	246.573	173.833	425.638	413.508	463.313	192.233	180.555	212.035	262.979	394.625	481.382	350.948	high	high	high	high
ENSMUST00000148750	350.429	307.76	416.202	308.735	537.379	461.578	540.646	394.334	301.847	293.346	367.968	527.045	530.457	167.94	high	high	high	high
ENSMUST00000102975	276.3	257.354	228.211	151.199	468.293	462.65	429.276	305.915	215.718	221.104	271.055	469.477	471.853	281.493	high	high	high	high
ENSMUST00000049040	231.902	209.408	194.985	162.969	404.493	387.24	328.799	257.363	203.47	216.726	210.484	372.652	375.29	474.79	high	high	high	high
ENSMUST00000001304	979.933	1023.27	1912.25	1927.56	450.247	441.921	347.179	993.533	939.124	774.647	1155.39	370.162	392.284	457.151	high	high	high	high
ENSMUST00000004920	97.1212	84.8285	146.895	104.119	376.785	364.366	298.438	105.393	102.723	101.952	95.3991	305.563	352.261	561.516	high	high	high	high
ENSMUST00000037649	397.206	425.782	467.79	377.544	415.977	374.016	413.347	407.36	344.122	326.184	389.673	384.371	410.548	424.077	high	high	high	high
ENSMUST00000179443	1398.94	1425.69	2721.05	2551.37	462.46	468.547	447.656	1370.1	1356.73	1092.7	1687.91	462.739	448.665	307.584	high	high	high	high
ENSMUST00000031003	1098.06	1148.26	1099.96	1074.69	470.663	426.375	519.679	1208.66	948.606	1011.08	1325.49	490.717	476.141	250.992	high	high	high	high
ENSMUST00000042970	316.338	297.924	374.232	269.804	481.6	435.667	508.651	400.255	307.378	289.594	330.616	409.712	475.982	331.471	high	high	high	high
ENSMUST00000171796	615.629	656.499	751.961	499.771	511.13	450.678	465.356	651.698	543.641	506.007	621.861	475.19	470.423	270.836	high	high	high	high
ENSMUST00000033187	1313.32	1385.94	1998.82	1885.01	536.832	467.297	520.496	1301.42	1181.31	999.192	1488.53	511.664	481.858	219.756	high	high	high	high
ENSMUST00000102993	322.68	313.907	294.664	300.587	417.8	429.055	382.577	311.836	322.392	332.751	355.349	397.261	422.936	392.841	high	high	high	high
ENSMUST00000038627	532.383	483.974	605.94	528.743	466.652	435.846	455.145	547.094	480.822	460.973	538.576	431.685	446.6	333.308	high	high	high	high
ENSMUST00000091829	72.94	73.764	152.141	74.2413	288.741	297.533	215.659	80.5247	76.252	98.8246	93.3801	231.296	266.181	713.655	high	high	high	high
ENSMUST00000005234	718.697	730.263	730.976	777.723	447.512	409.756	456.506	733.801	673.625	648.302	712.213	437.983	412.454	359.032	high	high	high	high
ENSMUST00000119870	820.575	799.11	1043.13	832.046	536.468	482.129	460.727	832.089	724.196	647.364	873.735	483.54	493.611	231.883	high	high	high	high
ENSMUST00000022197	199.396	160.232	216.844	168.401	419.076	417.618	345.137	174.865	165.147	171.379	168.084	351.998	387.519	468.91	high	high	high	high
ENSMUST00000058866	820.179	780.669	982.795	999.542	449.882	458.898	388.568	825.378	652.29	617.966	799.031	442.231	421.03	344.333	high	high	high	high
ENSMUST00000040706	626.729	639.697	631.297	593.025	512.406	441.385	519.134	630.777	506.503	501.003	598.138	508.442	484.558	210.936	high	high	high	high
ENSMUST00000070478	1338.29	1353.57	1363.15	1306.47	540.478	485.524	494.083	1376.81	1139.43	1026.09	1364.86	517.231	486.146	199.544	high	high	high	high
ENSMUST00000053872	340.519	327.84	335.759	349.477	414.701	418.155	325.94	367.887	293.945	328.998	338.187	349.947	375.608	474.79	high	high	high	high
ENSMUST00000102672	786.484	796.651	986.293	1020.37	481.053	456.217	453.647	771.695	683.107	618.279	745.527	447.944	436.753	314.934	high	high	high	high
ENSMUST00000034876	707.201	721.248	963.559	1080.12	499.828	483.379	394.695	746.433	634.511	587.631	800.545	425.825	450.571	322.651	high	high	high	high
ENSMUST00000045218	329.419	334.806	425.82	368.49	463.007	424.588	460.046	404.992	318.046	305.856	326.578	453.95	470.423	274.511	high	high	high	high
ENSMUST00000034138	575.195	622.896	733.599	831.141	539.202	503.93	512.735	594.462	546.407	535.091	583.5	503.461	525.375	167.94	high	high	high	high
ENSMUST00000025483	576.385	601.586	637.418	695.333	479.959	455.502	471.074	601.172	542.456	498.501	580.471	449.995	462.8	283.698	high	high	high	high
ENSMUST00000002043	282.643	274.566	358.493	289.722	434.023	420.656	419.882	251.837	244.164	238.305	270.55	398.873	426.271	371.159	high	high	high	high
ENSMUST00000025218	312.373	316.775	308.654	345.856	397.748	421.014	423.694	316.967	303.427	332.126	428.034	402.974	435.006	358.297	high	high	high	high
ENSMUST00000102823	200.981	167.608	218.593	173.833	480.506	395.281	426.009	217.101	171.863	165.437	165.056	392.281	431.989	368.219	high	high	high	high
ENSMUST00000049285	1198.36	1182.27	1689.29	1279.3	459.543	434.059	494.628	1151.42	950.186	944.15	1212.93	439.448	427.86	324.121	high	high	high	high
ENSMUST00000031355	541.5	540.936	528.121	532.365	440.403	434.595	408.854	534.858	465.414	435.329	496.681	415.718	433.418	342.128	high	high	high	high
ENSMUST00000062678	638.621	678.219	719.609	771.385	486.157	482.843	414.3	623.672	589.866	556.983	639.023	444.868	448.188	297.662	high	high	high	high
ENSMUST00000185502	836.828	833.533	1099.09	812.128	488.527	426.732	481.149	834.062	716.294	633.916	810.64	470.649	459.147	259.077	high	high	high	high
ENSMUST00000080141	489.57	526.183	544.734	563.148	449.7	440.313	431.182	566.831	454.746	398.113	450.244	468.159	464.706	255.769	high	high	high	high
ENSMUST00000030145	350.826	337.265	310.402	279.763	385.717	399.57	369.643	316.967	305.008	333.689	347.273	374.996	394.19	419.3	high	high	high	high
ENSMUST00000047357	266.39	268.009	284.171	286.101	403.764	377.59	423.694	269.995	264.314	255.818	250.864	387.007	408.801	391.371	high	high	high	high
ENSMUST00000027974	579.159	555.688	552.604	539.608	461.913	423.694	464.675	616.567	496.625	453.467	525.452	462.007	471.376	248.787	high	high	high	high
ENSMUST00000107635	777.762	831.484	929.458	773.196	453.528	375.624	470.257	937.876	659.402	602.017	652.651	455.854	426.43	299.867	high	high	high	high
ENSMUST00000049537	577.97	571.261	661.9	687.185	436.757	409.22	423.694	572.752	555.889	538.844	645.08	412.203	426.589	343.23	high	high	high	high
ENSMUST00000032399	228.334	207.359	318.272	229.062	430.377	417.44	393.742	253.416	195.964	216.413	216.541	388.472	428.495	363.81	high	high	high	high
ENSMUST00000160844	304.445	263.911	501.016	397.463	446.236	437.633	425.736	345.388	273.796	252.378	252.883	431.538	430.877	317.139	high	high	high	high
ENSMUST00000045540	313.563	258.174	169.628	148.483	304.418	311.65	358.888	384.466	328.318	317.427	343.235	329.879	355.12	493.532	high	high	high	high
ENSMUST00000047098	1359.3	1408.07	1837.93	1803.52	435.846	389.027	425.464	1432.08	1235.44	1057.05	1465.31	449.556	387.678	339.923	high	high	high	high
ENSMUST00000165952	144.691	111.056	160.885	125.848	402.123	370.085	384.892	129.076	121.292	151.99	133.761	377.34	405.466	392.106	high	high	high	high
ENSMUST00000029673	691.344	647.484	849.89	919.868	480.688	469.977	366.512	716.038	578.409	538.219	700.098	411.763	429.607	332.206	high	high	high	high
ENSMUST00000028977	740.103	635.599	505.388	577.634	484.334	409.756	484.689	755.117	591.842	612.337	641.547	494.526	439.453	235.558	high	high	high	high
ENSMUST00000034400	442.793	416.357	373.357	449.069	423.633	422.265	407.22	465.385	415.632	445.962	447.215	406.343	410.389	350.948	high	high	high	high
ENSMUST00000001240	480.453	406.112	394.342	282.479	411.966	383.844	376.995	491.832	369.012	393.735	478.51	406.197	401.813	353.52	high	high	high	high
ENSMUST00000097680	298.895	272.927	349.749	377.544	423.633	415.474	385.981	313.415	275.771	266.138	265.502	398.873	413.883	348.375	high	high	high	high
ENSMUST00000044505	567.664	620.437	929.458	805.79	476.313	460.685	354.667	590.12	551.148	455.656	633.975	382.467	414.36	362.707	high	high	high	high
ENSMUST00000183878	578.367	520.446	837.649	524.216	434.023	445.495	411.305	459.859	457.512	419.379	496.177	387.74	404.195	366.749	high	high	high	high
ENSMUST00000159879	78.4898	69.666	159.136	97.7812	382.072	307.361	338.329	73.8143	80.5979	80.0604	75.7136	314.938	359.408	483.977	high	high	high	high
ENSMUST00000113383	1127.8	1002.37	819.287	708.914	382.254	367.225	380.807	1199.19	926.481	856.897	966.61	428.169	383.39	346.538	high	high	high	high
ENSMUST00000130411	293.742	258.584	360.242	267.088	457.903	434.595	365.967	251.442	254.041	237.679	247.836	373.092	399.272	384.756	high	high	high	high
ENSMUST00000031841	276.3	309.399	390.845	423.719	384.077	397.962	342.414	248.285	279.722	278.335	305.378	338.815	377.037	438.409	high	high	high	high
ENSMUST00000041282	298.499	295.466	271.93	311.451	398.295	399.927	372.911	313.81	265.499	273.644	290.74	390.23	411.501	351.683	high	high	high	high
ENSMUST00000017610	399.188	387.261	306.905	246.264	427.825	422.622	392.925	452.359	370.592	355.894	381.092	414.4	403.719	333.308	high	high	high	high
ENSMUST00000034277	272.732	249.158	259.689	217.292	414.519	419.227	342.958	269.995	251.276	251.44	281.655	384.517	396.413	367.852	high	high	high	high
ENSMUST00000020174	388.881	361.443	436.312	591.214	426.914	431.021	381.897	398.676	360.715	348.075	363.425	397.701	412.613	337.718	high	high	high	high
ENSMUST00000176540	117.338	111.875	128.533	79.6736	278.351	285.203	204.223	115.261	129.589	154.804	136.284	299.118	336.856	511.171	high	high	high	high
ENSMUST00000018993	656.856	566.343	540.362	459.934	421.628	417.261	401.366	607.093	523.491	520.706	632.461	423.921	409.913	311.627	high	high	high	high
ENSMUST00000027997	248.551	194.245	334.01	250.791	419.623	414.044	357.118	150.786	617.522	598.577	304.873	381.588	434.53	328.899	high	high	high	high
ENSMUST00000033341	658.046	622.076	504.513	430.056	465.012	403.323	468.896	663.539	543.641	543.223	651.642	473.139	475.823	195.869	high	high	high	high
ENSMUST00000052138	285.417	287.27	205.478	241.737	420.534	426.911	401.23	257.363	218.879	258.633	267.521	402.681	417.377	324.489	high	high	high	high
ENSMUST00000023100	504.634	489.301	337.508	370.301	408.321	392.779	403.136	553.015	510.849	563.238	424.501	401.509	404.354	335.881	high	high	high	high
ENSMUST00000113314	618.404	584.784	1169.04	1263.01	488.527	463.008	393.605	733.012	542.851	494.748	547.157	425.386	446.124	269.734	high	high	high	high
ENSMUST00000003754	618.008	638.468	711.74	1039.38	417.617	420.299	335.47	637.882	639.252	571.682	672.337	354.049	388.472	398.353	high	high	high	high
ENSMUST00000053506	747.635	722.887	599.82	623.808	438.398	400.463	429.957	801.695	600.138	622.97	640.032	415.572	381.167	343.23	high	high	high	high
ENSMUST00000109426	904.218	1060.15	961.81	911.72	406.498	381.521	431.863	1008.53	783.064	845.326	1016.08	443.55	404.831	290.313	high	high	high	high
ENSMUST00000037418	460.632	423.323	503.639	400.179	443.867	399.391	477.473	519.858	429.856	404.68	453.777	441.499	452	244.377	high	high	high	high
ENSMUST00000028347	189.089	148.757	299.036	210.049	405.586	376.518	319.541	198.943	176.604	203.904	183.732	320.651	358.773	457.886	high	high	high	high
ENSMUST00000020375	294.138	288.499	221.216	338.613	391.186	421.371	359.568	288.942	264.314	271.455	287.207	405.171	380.373	351.683	high	high	high	high
ENSMUST00000070210	390.467	374.147	442.433	571.296	436.94	424.052	408.718	406.966	359.135	335.253	354.34	424.947	426.748	284.433	high	high	high	high
ENSMUST00000114366	101.482	87.6971	89.186	143.05	429.648	432.986	386.117	99.077	230.336	354.017	416.93	372.213	404.513	356.827	high	high	high	high
ENSMUST00000060945	458.254	436.847	532.493	434.583	442.955	383.844	455.961	472.096	404.965	416.877	409.863	428.609	435.006	268.631	high	high	high	high
ENSMUST00000025476	271.939	317.185	359.367	365.774	405.222	412.436	347.315	311.046	258.783	267.077	271.055	369.137	383.708	379.244	high	high	high	high
ENSMUST00000027554	184.728	176.624	156.513	157.536	347.62	407.075	393.742	194.996	170.678	213.911	216.541	353.023	380.373	396.883	high	high	high	high
ENSMUST00000029780	340.915	354.067	461.669	466.272	416.706	424.945	399.732	356.835	303.427	291.783	306.388	400.044	421.983	307.217	high	high	high	high
ENSMUST00000022337	1040.19	1026.55	999.408	794.925	436.757	394.388	465.083	924.85	872.749	923.51	1057.97	406.636	416.266	306.115	high	high	high	high
ENSMUST00000025217	370.25	381.114	364.614	432.773	377.332	351.857	347.179	365.124	366.642	343.697	373.52	339.987	364.014	424.077	high	high	high	high
ENSMUST00000029414	299.292	279.074	379.478	426.435	412.149	382.594	362.019	314.994	273.401	277.397	294.778	359.762	384.184	382.551	high	high	high	high
ENSMUST00000149319	660.028	674.53	960.936	963.326	460.819	444.423	381.76	692.749	566.161	538.844	721.298	401.509	415.789	309.054	high	high	high	high
ENSMUST00000023758	658.046	686.824	600.694	601.174	404.857	424.766	452.558	722.749	629.77	672.07	779.345	433.296	425.636	267.161	high	high	high	high
ENSMUST00000049263	505.03	520.446	582.332	483.474	397.93	366.689	449.29	474.07	473.315	451.904	562.804	413.521	421.03	291.415	high	high	high	high
ENSMUST00000055808	175.611	165.969	141.648	108.646	379.155	408.326	421.788	219.864	188.457	273.644	257.426	390.23	453.588	281.861	high	high	high	high
ENSMUST00000035871	340.519	334.397	265.809	208.238	390.639	389.205	392.244	356.835	300.267	336.504	356.359	384.957	395.619	343.598	high	high	high	high
ENSMUST00000031556	269.561	260.223	396.091	427.34	469.022	392.958	448.337	341.046	268.66	256.131	260.455	424.507	445.647	253.564	high	high	high	high
ENSMUST00000065716	470.542	459.386	483.528	295.155	338.87	303.609	421.788	489.464	423.929	342.133	411.377	434.468	395.778	292.15	high	high	high	high
ENSMUST00000037915	96.3284	74.5836	100.553	38.026	231.868	268.226	221.105	84.0773	97.1916	113.21	137.294	199.656	235.053	686.461	high	high	high	high
ENSMUST00000029355	336.951	331.528	280.674	257.128	423.451	386.525	455.689	385.65	310.539	281.15	374.025	416.304	430.242	274.511	high	high	high	high
ENSMUST00000055990	1066.35	1139.65	1702.4	1567.22	497.459	456.217	443.436	1097.35	1003.52	853.457	1145.29	459.809	443.106	217.918	high	high	high	high
ENSMUST00000021201	149.448	143.84	156.513	130.375	409.05	369.906	366.103	149.602	176.999	200.777	140.827	342.77	388.79	387.696	high	high	high	high
ENSMUST00000050078	510.184	438.896	416.202	344.045	426.003	379.913	446.023	536.042	430.646	495.687	556.747	469.184	441.2	208.364	high	high	high	high
ENSMUST00000063417	298.895	292.187	432.815	466.272	391.733	386.704	359.841	302.362	304.218	293.659	321.53	325.045	371.161	422.24	high	high	high	high
ENSMUST00000025474	240.226	226.619	264.935	281.574	404.857	382.415	356.845	271.968	219.274	225.795	230.169	359.762	382.914	374.834	high	high	high	high
ENSMUST00000062024	1073.09	1019.17	1024.77	1076.5	464.829	387.597	402.455	1124.19	836.796	775.273	989.324	482.221	430.242	204.689	high	high	high	high
ENSMUST00000053811	541.897	564.294	470.413	465.366	417.982	395.46	369.507	550.252	489.514	475.672	513.843	398.58	386.725	331.471	high	high	high	high
ENSMUST00000091892	801.151	822.878	1353.53	1489.35	435.664	426.196	364.197	806.037	711.158	648.302	843.954	386.275	391.013	339.188	high	high	high	high
ENSMUST00000029266	612.062	624.945	812.292	884.558	448.241	453.358	366.376	592.883	553.518	535.404	649.118	393.746	414.042	308.319	high	high	high	high
ENSMUST00000085814	933.949	950.326	843.77	832.951	364.572	339.885	351.535	869.193	778.323	764.327	780.86	345.553	333.838	436.204	high	high	high	high
ENSMUST00000001507	80.4719	93.0245	90.0604	101.403	240.253	284.309	219.88	93.5508	111.415	102.89	91.8658	244.333	279.999	590.915	high	high	high	high
ENSMUST00000022993	243.001	237.274	225.588	206.427	402.67	397.604	363.925	229.732	222.039	216.413	233.198	358.883	386.249	369.689	high	high	high	high
ENSMUST00000005017	403.945	373.737	477.408	422.813	379.337	385.989	303.203	380.519	402.199	379.349	403.301	325.631	348.132	440.981	high	high	high	high
ENSMUST00000025590	529.211	479.876	410.081	372.112	429.101	390.456	437.173	496.964	433.016	505.069	546.652	430.366	427.383	253.932	high	high	high	high
ENSMUST00000166615	598.584	660.187	442.433	486.19	388.452	375.446	376.859	635.514	470.155	484.115	550.186	418.062	373.067	320.446	high	high	high	high
ENSMUST00000075657	467.767	457.337	318.272	324.127	397.748	408.326	404.633	524.2	394.693	449.714	488.1	433.589	410.707	267.161	high	high	high	high
ENSMUST00000042345	811.458	893.773	856.885	911.72	436.028	409.041	441.938	732.222	743.16	743.686	828.307	425.239	391.808	292.885	high	high	high	high
ENSMUST00000023099	290.174	256.125	290.292	282.479	395.561	341.672	404.633	335.52	312.515	332.751	336.673	360.641	396.731	352.418	high	high	high	high
ENSMUST00000165017	279.471	313.497	202.855	222.724	378.79	392.243	363.653	268.81	268.66	277.397	252.883	357.564	384.819	367.117	high	high	high	high
ENSMUST00000036274	342.104	361.443	404.835	442.732	394.832	409.398	317.771	347.756	311.329	306.794	381.597	346.725	370.843	391.738	high	high	high	high
ENSMUST00000075452	214.856	179.082	236.955	204.616	361.473	380.985	342.277	193.812	180.555	184.514	182.217	363.863	364.332	376.304	high	high	high	high
ENSMUST00000098950	279.471	271.287	236.081	228.156	345.979	367.762	367.329	275.126	235.472	278.648	269.036	352.145	376.72	375.202	high	high	high	high
ENSMUST00000022954	481.245	489.711	598.071	590.309	399.206	398.319	342.277	496.569	435.782	442.209	513.338	374.556	382.596	346.538	high	high	high	high
ENSMUST00000027741	213.27	193.835	264.935	153.01	400.482	364.902	443.027	180.786	165.147	200.151	226.131	351.559	422.777	329.266	high	high	high	high
ENSMUST00000025243	286.21	300.793	278.051	270.709	441.315	409.398	458.14	286.968	252.461	233.301	264.493	451.606	452	199.177	high	high	high	high
ENSMUST00000051064	371.043	376.196	514.131	574.918	474.491	437.811	488.773	413.281	329.108	327.122	338.187	429.634	456.447	214.243	high	high	high	high
ENSMUST00000023507	516.526	397.506	431.94	263.466	442.955	387.597	452.694	470.122	407.731	402.804	414.911	442.524	429.13	227.84	high	high	high	high
ENSMUST00000067664	378.574	381.114	638.292	648.253	363.478	365.975	275.02	353.282	355.579	327.747	396.739	296.042	324.945	478.465	high	high	high	high
ENSMUST00000020484	569.646	559.377	529.87	631.957	469.569	433.165	491.088	564.857	512.824	522.582	599.652	448.237	434.53	216.448	high	high	high	high
ENSMUST00000132734	112.978	109.826	163.508	93.2543	387.176	364.902	369.235	134.208	110.23	122.28	111.047	378.951	406.101	312.362	high	high	high	high
ENSMUST00000025617	444.379	406.931	562.222	574.012	413.425	402.608	340.507	421.571	384.025	386.542	445.196	360.934	379.42	356.46	high	high	high	high
ENSMUST00000043285	958.13	893.773	1374.51	1353.55	495.636	452.643	475.431	959.981	847.463	727.424	1016.08	470.649	461.37	161.693	high	high	high	high
ENSMUST00000075637	353.204	319.234	288.543	286.101	434.023	372.05	360.794	339.467	282.883	296.474	353.33	418.062	404.831	270.101	high	high	high	high
ENSMUST00000072727	554.978	590.112	577.96	648.253	432.2	411.007	416.206	527.358	502.552	481.614	561.29	412.935	408.484	271.571	high	high	high	high
ENSMUST00000079869	158.565	139.332	159.136	153.01	326.11	345.603	293.128	146.05	163.171	163.561	141.332	314.645	340.191	437.674	high	high	high	high
ENSMUST00000063694	570.835	535.198	394.342	315.978	393.191	356.146	410.76	588.541	494.255	527.586	572.9	391.695	364.808	335.146	high	high	high	high
ENSMUST00000166791	299.292	290.958	244.824	276.141	369.494	374.909	299.391	291.31	261.548	251.753	301.845	326.364	340.032	424.812	high	high	high	high
ENSMUST00000164756	318.32	346.281	517.629	542.324	372.41	366.153	276.79	347.756	331.084	300.852	334.654	304.684	324.468	461.928	high	high	high	high
ENSMUST00000023561	293.346	252.027	254.443	230.872	376.421	370.978	358.615	279.073	255.622	277.397	284.178	370.015	385.137	335.513	high	high	high	high
ENSMUST00000087366	82.4539	86.8775	138.151	132.186	337.411	340.957	296.123	99.4717	84.1537	107.894	105.494	332.809	374.02	383.286	high	high	high	high
ENSMUST00000088392	515.337	453.239	500.141	460.839	431.107	374.552	440.713	500.516	442.103	390.295	461.853	428.462	401.972	259.444	high	high	high	high
ENSMUST00000115222	87.6073	75.813	118.04	75.1467	327.568	386.525	395.784	89.6035	77.8323	97.8864	103.475	349.508	400.384	339.556	high	high	high	high
ENSMUST00000026663	183.936	158.183	143.397	165.685	337.776	364.366	252.692	188.286	157.64	136.353	169.094	313.766	369.414	406.07	high	high	high	high
ENSMUST00000078976	527.229	532.33	627.8	659.118	396.472	402.965	362.019	563.673	523.491	478.799	542.109	394.185	398.001	296.56	high	high	high	high
ENSMUST00000022904	286.607	307.76	295.538	339.518	382.983	384.38	334.789	309.468	250.486	266.451	285.693	345.846	364.332	378.509	high	high	high	high
ENSMUST00000009727	1031.47	1003.19	1040.5	914.436	422.904	373.122	482.647	988.796	851.809	876.599	1068.07	467.573	391.808	228.575	high	high	high	high
ENSMUST00000163226	681.434	706.905	1084.22	664.55	451.158	370.621	479.651	806.431	640.833	555.419	725.841	479.438	441.994	166.103	high	high	high	high
ENSMUST00000021001	531.986	520.855	604.192	655.497	472.85	418.691	472.572	527.753	506.108	483.803	551.195	467.134	452.477	167.573	high	high	high	high
ENSMUST00000034243	823.35	803.208	668.895	531.459	393.92	378.841	444.389	739.327	599.743	640.483	759.155	402.242	368.779	315.302	high	high	high	high
ENSMUST00000001451	1016.8	1010.57	887.488	927.111	390.639	373.122	387.751	1152.61	926.876	866.592	1036.27	433.443	389.266	262.016	high	high	high	high
ENSMUST00000162645	430.108	382.343	463.418	207.332	432.929	397.247	396.465	397.492	332.664	358.708	386.644	400.191	399.59	284.8	high	high	high	high
ENSMUST00000073339	478.074	485.203	601.569	707.103	441.497	420.656	381.216	453.938	477.661	470.981	587.538	391.841	405.307	287.005	high	high	high	high
ENSMUST00000060714	481.245	506.922	435.438	465.366	391.915	372.05	363.517	469.333	426.3	420.317	413.396	369.43	374.337	337.718	high	high	high	high
ENSMUST00000049126	505.823	525.363	612.061	446.353	426.367	360.614	413.755	515.121	416.423	379.036	454.786	411.47	394.19	275.246	high	high	high	high
ENSMUST00000037141	491.156	435.617	310.402	267.993	387.54	366.153	388.432	502.49	410.101	393.109	449.739	371.92	382.596	326.326	high	high	high	high
ENSMUST00000091014	246.173	245.88	299.036	282.479	357.098	364.545	391.019	326.441	255.622	270.204	302.35	341.891	381.167	357.562	high	high	high	high
ENSMUST00000021450	187.9	154.085	220.342	215.481	389.91	354.895	338.193	191.838	165.147	167.314	151.932	331.198	358.138	389.534	high	high	high	high
ENSMUST00000075686	210.892	170.067	197.608	180.171	371.864	367.404	358.207	208.812	163.171	202.653	205.436	353.756	374.337	348.008	high	high	high	high
ENSMUST00000027186	217.234	215.964	232.583	196.468	395.378	377.054	381.76	219.075	176.999	209.533	217.046	371.48	394.984	309.422	high	high	high	high
ENSMUST00000059462	210.495	198.343	190.613	234.494	346.708	353.108	292.719	217.89	190.037	195.46	215.027	321.969	334.791	418.932	high	high	high	high
ENSMUST00000051906	249.74	259.813	320.895	230.872	348.531	325.41	358.343	290.126	223.62	227.985	274.083	369.576	394.19	310.892	high	high	high	high
ENSMUST00000102514	653.685	641.337	618.182	580.35	397.019	365.796	395.511	638.277	494.65	510.698	621.356	384.224	367.667	322.651	high	high	high	high
ENSMUST00000034140	343.69	375.786	391.719	488.906	346.708	316.832	337.376	350.125	309.354	344.322	343.235	343.942	345.273	385.124	high	high	high	high
ENSMUST00000111879	526.437	578.227	581.458	556.81	407.227	434.059	507.153	583.015	510.454	526.648	596.623	431.831	407.531	234.823	high	high	high	high
ENSMUST00000060427	337.744	336.036	339.257	374.828	392.462	376.339	302.794	336.309	297.896	292.721	244.303	325.631	352.42	395.781	high	high	high	high
ENSMUST00000001825	146.276	166.379	192.362	225.44	311.709	336.132	345.273	170.128	156.06	199.838	210.989	289.45	342.256	439.879	high	high	high	high
ENSMUST00000056978	530.004	506.922	417.076	335.897	374.416	362.043	345.817	549.857	404.965	380.913	485.072	358.443	355.597	357.195	high	high	high	high
ENSMUST00000046929	197.81	157.773	177.498	88.7274	376.968	364.545	416.751	238.811	181.74	193.271	231.684	353.463	406.26	310.892	high	high	high	high
ENSMUST00000037942	200.189	222.931	440.684	344.951	405.951	399.57	308.785	232.89	175.419	184.202	198.874	328.268	356.708	384.389	high	high	high	high
ENSMUST00000030134	247.362	229.078	319.146	278.858	360.926	365.975	325.259	217.101	190.827	212.661	251.369	312.741	318.751	437.306	high	high	high	high
ENSMUST00000076840	220.802	182.361	140.774	93.2543	286.554	268.763	310.282	226.18	176.209	181.387	225.627	333.102	354.485	381.081	high	high	high	high
ENSMUST00000017900	790.051	818.37	705.619	493.433	388.816	333.094	385.028	869.983	678.761	638.92	758.65	398.726	365.443	303.542	high	high	high	high
ENSMUST00000090227	198.999	172.526	205.478	135.807	356.187	321.479	422.741	189.075	206.631	204.842	200.389	301.022	375.926	390.636	high	high	high	high
ENSMUST00000054145	363.114	342.593	221.216	198.279	369.676	384.023	357.254	370.651	290.785	308.983	317.997	370.894	374.02	322.284	high	high	high	high
ENSMUST00000017086	1087.76	1151.13	1237.24	1339.06	402.305	330.056	437.99	1198	1019.72	956.972	1219.49	450.142	394.825	221.226	high	high	high	high
ENSMUST00000069651	391.26	426.602	567.468	498.865	422.539	384.559	338.329	464.596	362.691	344.01	383.616	361.227	374.496	330.369	high	high	high	high
ENSMUST00000165561	116.942	116.793	149.518	81.4844	294.939	383.13	427.234	174.865	119.712	197.024	202.912	313.327	406.419	346.17	high	high	high	high
ENSMUST00000022629	172.043	194.245	311.277	234.494	391.186	392.958	341.052	169.733	188.457	183.263	196.855	374.849	369.414	321.549	high	high	high	high
ENSMUST00000023830	125.267	127.038	153.015	124.943	352.906	359.005	329.207	112.103	108.254	116.025	128.713	303.073	341.303	421.137	high	high	high	high
ENSMUST00000087143	177.197	181.131	244.824	212.765	369.676	372.765	391.972	201.707	157.64	169.503	159.503	360.055	380.373	324.121	high	high	high	high
ENSMUST00000021929	340.915	333.577	301.659	274.331	365.484	382.057	331.658	384.861	299.872	322.431	366.454	381.881	375.767	306.85	high	high	high	high
ENSMUST00000071134	830.089	897.871	1296.7	1418.73	390.457	359.184	378.084	901.166	878.675	748.065	1007.5	384.371	352.261	327.429	high	high	high	high
ENSMUST00000100162	472.128	520.855	510.634	548.661	382.801	384.917	325.531	487.885	453.561	462.849	534.538	357.125	358.297	346.538	high	high	high	high
ENSMUST00000047672	662.406	700.348	835.026	951.556	452.069	436.203	410.216	622.882	638.067	586.38	703.127	402.242	419.601	239.967	high	high	high	high
ENSMUST00000109764	611.269	519.216	396.091	355.815	452.981	399.391	410.079	499.332	456.722	415.313	496.681	422.749	402.925	235.558	high	high	high	high
ENSMUST00000021810	420.991	361.034	563.971	581.255	418.711	389.92	316.545	386.045	357.95	298.663	350.806	342.037	357.661	360.135	high	high	high	high
ENSMUST00000094077	547.05	452.829	337.508	199.184	352.177	340.957	334.381	491.438	431.041	450.027	463.872	332.369	347.02	379.611	high	high	high	high
ENSMUST00000020904	158.169	135.644	146.895	139.429	327.203	312.722	306.879	168.944	144.207	145.735	179.189	283.884	335.903	438.409	high	high	high	high
ENSMUST00000056153	828.107	720.018	603.317	605.701	450.793	417.618	425.328	709.328	536.529	512.887	737.955	438.716	401.178	218.286	high	high	high	high
ENSMUST00000032898	372.232	424.143	373.357	365.774	375.509	335.238	339.691	360.782	336.615	379.974	396.739	339.108	344.003	372.997	high	high	high	high
ENSMUST00000161609	78.8862	68.4366	143.397	88.7274	329.573	355.431	372.775	89.9982	95.6113	96.01	80.2564	299.85	363.538	392.473	high	high	high	high
ENSMUST00000031011	507.409	517.577	647.91	749.656	427.096	418.155	330.16	531.7	432.226	424.07	549.681	367.672	389.425	297.295	high	high	high	high
ENSMUST00000018851	642.982	821.649	911.097	656.402	343.427	305.753	316.001	779.195	703.256	609.835	590.061	315.817	310.968	425.179	high	high	high	high
ENSMUST00000025421	275.507	277.434	260.563	299.681	362.749	364.009	336.423	270.389	227.966	245.498	230.674	343.209	356.232	352.05	high	high	high	high
ENSMUST00000160379	570.438	577.818	522.875	484.379	388.269	376.518	369.916	542.752	436.177	475.984	559.776	367.672	347.02	336.248	high	high	high	high
ENSMUST00000034775	244.983	233.996	255.317	231.778	372.957	334.881	374	326.836	280.907	293.972	269.036	330.172	359.567	360.87	high	high	high	high
ENSMUST00000040361	614.44	648.303	662.775	681.753	411.602	403.501	338.057	626.04	519.145	491.621	623.88	371.48	370.685	305.012	high	high	high	high
ENSMUST00000100816	267.975	222.521	186.241	123.132	356.916	356.325	313.686	277.889	200.31	246.436	225.627	334.567	364.967	347.273	high	high	high	high
ENSMUST00000020420	971.608	1001.96	870.001	806.695	413.06	377.233	415.389	1019.19	858.526	823.121	997.905	419.966	379.261	247.317	high	high	high	high
ENSMUST00000002825	283.435	283.991	267.558	239.926	345.797	337.204	359.432	324.467	284.463	298.35	267.017	347.164	346.544	352.785	high	high	high	high
ENSMUST00000045174	248.551	215.964	277.176	328.654	370.588	380.092	301.977	232.495	195.568	210.471	239.255	320.797	347.815	377.407	high	high	high	high
ENSMUST00000046515	244.19	213.915	268.432	247.169	374.233	332.737	368.962	262.1	202.285	220.479	241.779	387.447	381.484	277.083	high	high	high	high
ENSMUST00000089860	419.009	392.588	439.81	449.069	423.268	374.195	384.483	425.518	323.182	290.845	373.52	402.681	403.084	239.967	high	high	high	high
ENSMUST00000019333	226.352	201.212	231.709	204.616	392.28	369.191	319.404	181.575	188.852	187.954	233.198	334.86	357.979	352.05	high	high	high	high
ENSMUST00000080723	463.01	488.072	641.79	648.253	389.91	368.834	366.24	482.359	428.275	376.534	454.282	358.297	364.173	322.284	high	high	high	high
ENSMUST00000135687	654.478	599.537	744.091	652.78	433.294	347.569	379.446	687.618	512.034	446.274	537.062	403.999	358.297	282.228	high	high	high	high
ENSMUST00000022881	327.041	307.35	397.84	443.637	397.748	384.202	327.165	307.889	253.251	269.266	301.845	331.93	361.949	350.58	high	high	high	high
ENSMUST00000099224	161.737	177.853	202.855	207.332	359.833	361.328	298.846	153.55	165.937	169.19	199.884	305.417	326.056	412.318	high	high	high	high
ENSMUST00000030128	225.559	239.733	295.538	348.572	339.599	362.758	284.55	246.311	227.966	226.734	235.722	294.284	327.168	421.872	high	high	high	high
ENSMUST00000179869	186.711	187.688	222.965	233.589	388.816	370.621	340.78	202.496	239.028	219.853	184.236	348.043	356.867	336.983	high	high	high	high
ENSMUST00000025649	980.726	1091.71	1059.74	1138.07	446.054	400.285	429.549	1052.74	1004.31	915.378	1071.6	427.437	402.607	211.671	high	high	high	high
ENSMUST00000024873	200.585	170.477	240.453	239.021	358.557	370.621	291.358	160.655	163.566	159.808	173.132	309.665	336.856	394.678	high	high	high	high
ENSMUST00000023467	239.037	228.258	213.347	215.481	342.151	340.421	375.498	232.495	238.633	257.695	227.646	327.243	340.826	372.629	high	high	high	high
ENSMUST00000004133	651.307	628.633	487.9	572.201	374.051	357.04	425.464	728.275	511.639	611.399	691.518	395.503	399.59	244.01	high	high	high	high
ENSMUST00000000356	597.791	581.506	714.363	797.641	403.764	379.556	353.033	602.356	572.482	531.339	613.785	371.334	373.861	292.885	high	high	high	high
ENSMUST00000032196	403.549	375.786	386.473	382.977	369.676	352.393	343.23	357.624	314.49	331.5	385.13	343.649	356.073	336.983	high	high	high	high
ENSMUST00000026221	333.383	294.236	257.066	228.156	438.033	383.666	379.718	257.758	444.869	374.345	270.045	368.844	387.361	280.023	high	high	high	high
ENSMUST00000033873	524.851	489.301	451.176	488.001	346.344	312.901	367.465	527.753	444.079	441.896	506.272	354.342	348.609	332.206	high	high	high	high
ENSMUST00000026479	688.173	738.459	882.242	967.853	410.326	390.456	365.967	703.407	638.462	598.89	715.241	389.644	378.626	266.426	high	high	high	high
ENSMUST00000035010	639.018	623.305	653.157	575.823	413.972	352.036	410.624	631.566	526.257	511.636	593.09	412.495	394.349	226.37	high	high	high	high
ENSMUST00000085245	332.987	324.971	317.397	249.885	349.625	355.253	414.708	339.072	307.773	323.682	402.292	340.133	370.049	320.079	high	high	high	high
ENSMUST00000079252	189.882	148.348	163.508	165.685	361.109	348.462	321.583	200.522	141.837	163.561	168.084	330.758	360.361	338.086	high	high	high	high
ENSMUST00000067689	172.44	170.477	161.759	128.564	375.145	312.365	332.475	214.733	185.296	154.804	162.532	327.535	359.567	341.026	high	high	high	high
ENSMUST00000034843	170.854	189.737	217.719	213.67	372.228	326.303	335.606	204.47	213.347	195.773	157.484	309.665	361.155	357.195	high	high	high	high
ENSMUST00000091291	165.304	128.677	152.141	117.7	376.968	335.417	341.052	152.365	163.566	157.932	143.351	368.404	372.749	286.638	high	high	high	high
ENSMUST00000180086	332.987	306.12	306.031	421.003	370.77	325.946	312.325	318.941	334.244	347.137	278.121	351.559	318.274	357.562	high	high	high	high
ENSMUST00000066497	107.428	104.089	153.015	106.835	305.147	335.417	308.513	87.2351	114.18	115.087	98.4277	282.712	320.021	423.71	high	high	high	high
ENSMUST00000179857	377.385	353.657	327.89	397.463	392.28	377.054	369.507	401.834	328.318	352.766	346.264	382.027	377.99	265.691	high	high	high	high
ENSMUST00000106653	340.915	359.394	363.739	381.166	405.769	392.243	404.633	369.072	321.997	321.805	366.454	374.556	388.949	262.016	high	high	high	high
ENSMUST00000027623	116.545	99.9911	120.663	100.497	251.372	275.553	214.434	93.9455	109.044	118.214	99.942	235.251	251.57	538.365	high	high	high	high
ENSMUST00000102880	348.447	302.432	322.644	404.706	489.62	375.803	366.784	268.021	290.785	278.335	253.893	355.074	404.99	264.221	high	high	high	high
ENSMUST00000110857	390.07	406.521	442.433	480.758	388.087	372.586	360.249	391.966	332.269	313.049	376.549	348.336	363.379	312.362	high	high	high	high
ENSMUST00000053063	141.519	159.822	136.402	104.119	272.7	367.94	320.766	163.023	171.073	193.271	207.455	302.487	332.409	388.431	high	high	high	high
ENSMUST00000025955	489.174	477.007	503.639	478.042	356.187	327.912	453.919	495.78	496.23	490.683	450.748	383.199	416.425	223.431	high	high	high	high
ENSMUST00000032264	605.323	627.403	696.001	818.465	415.977	400.106	362.564	618.54	567.741	522.895	700.098	389.351	401.178	231.148	high	high	high	high
ENSMUST00000001185	174.422	168.018	231.709	213.67	341.786	325.767	296.395	185.128	150.133	172.005	186.76	329.147	343.05	348.375	high	high	high	high
ENSMUST00000002198	277.489	287.679	261.437	248.075	337.776	351.679	351.535	300.783	285.649	286.153	311.435	344.088	360.361	315.669	high	high	high	high
ENSMUST00000068259	159.754	140.971	127.658	117.7	378.426	375.446	310.691	184.338	153.294	160.746	169.094	345.113	368.302	306.482	high	high	high	high
ENSMUST00000033871	213.667	217.604	223.839	208.238	306.241	331.307	317.907	238.022	188.457	227.985	249.855	338.375	342.256	338.453	high	high	high	high
ENSMUST00000111332	960.905	1017.12	1843.18	1743.77	409.05	385.989	382.714	985.638	967.57	794.662	1163.47	384.517	367.191	266.426	high	high	high	high
ENSMUST00000043359	143.502	132.775	251.819	191.036	329.026	371.693	301.977	140.918	173.048	162.31	144.361	290.915	338.762	388.431	high	high	high	high
ENSMUST00000034607	357.961	359.394	356.744	409.233	384.624	362.043	398.507	343.809	315.28	342.759	376.044	356.539	365.761	294.723	high	high	high	high
ENSMUST00000076313	174.025	147.528	235.206	191.941	373.869	332.379	354.395	172.102	155.665	148.55	152.941	358.443	372.432	284.8	high	high	high	high
ENSMUST00000035237	571.231	600.766	526.372	471.704	355.822	337.204	368.554	566.041	516.775	469.73	531.005	354.049	327.327	334.043	high	high	high	high
ENSMUST00000170883	553.789	559.377	658.403	684.469	448.606	416.904	378.357	545.515	506.108	463.475	570.881	392.427	410.707	211.671	high	high	high	high
ENSMUST00000025050	233.487	228.668	240.453	221.819	306.423	314.867	240.03	245.127	226.78	248.625	231.684	264.841	282.54	465.97	high	high	high	high
ENSMUST00000036215	717.904	726.575	738.845	775.007	419.987	368.655	385.436	700.644	610.411	537.281	654.166	393.453	383.867	235.19	high	high	high	high
ENSMUST00000154689	257.668	212.686	169.628	104.119	319.73	320.406	305.245	288.152	225.99	211.41	276.607	423.482	394.507	194.399	high	high	high	high
ENSMUST00000066308	278.678	288.499	220.342	248.075	376.056	360.435	304.292	299.205	224.015	215.475	244.807	379.097	367.826	264.589	high	high	high	high
ENSMUST00000028600	44.0019	28.2762	48.9649	44.3637	335.953	285.203	305.381	34.3414	40.6941	44.0958	33.8187	240.964	332.091	438.409	high	high	high	high
ENSMUST00000027297	380.557	401.194	368.111	375.734	390.639	384.559	389.112	406.571	320.021	322.431	370.997	383.785	382.596	244.377	high	high	high	high
ENSMUST00000042732	336.951	287.679	330.513	276.141	331.214	312.008	332.339	314.994	286.044	294.597	321.53	313.62	318.909	377.407	high	high	high	high
ENSMUST00000099172	1249.89	1316.28	1153.3	979.623	399.571	323.266	411.713	1375.24	1122.84	1043.29	1259.37	417.769	374.973	217.183	high	high	high	high
ENSMUST00000019734	411.08	402.833	485.277	477.136	370.223	364.009	291.63	391.966	335.43	329.624	463.872	312.594	336.38	360.87	high	high	high	high
ENSMUST00000032078	558.546	613.47	593.699	753.278	398.842	384.202	374.136	561.305	530.998	519.455	611.766	379.83	373.067	256.872	high	high	high	high
ENSMUST00000100635	99.8961	92.6147	125.91	77.8628	319.547	345.782	320.902	185.523	143.022	160.121	170.103	314.206	364.808	330.736	high	high	high	high
ENSMUST00000171588	72.94	106.138	204.603	48.8906	311.891	327.376	397.145	77.3669	102.723	130.098	133.256	300.876	393.396	315.302	high	high	high	high
ENSMUST00000089510	851.099	840.909	830.654	840.194	422.357	408.505	422.741	854.194	751.457	759.01	842.44	433.589	387.202	187.417	high	high	high	high
ENSMUST00000161568	181.557	183.18	259.689	281.574	334.859	347.39	348.404	227.759	170.678	199.526	191.303	342.037	358.455	305.747	high	high	high	high
ENSMUST00000069747	388.088	418.815	480.031	553.188	373.686	376.339	365.014	415.65	359.53	341.821	424.501	375.875	398.954	231.148	high	high	high	high
ENSMUST00000020896	371.439	364.312	549.106	465.366	384.806	381.521	301.569	344.993	330.689	331.187	355.349	324.459	347.973	333.308	high	high	high	high
ENSMUST00000167377	915.318	917.951	920.715	871.883	350.718	307.183	342.822	937.876	976.262	913.502	839.916	340.426	324.309	340.291	high	high	high	high
ENSMUST00000058550	506.616	501.185	730.101	740.602	349.625	341.672	281.964	534.068	512.429	475.359	576.433	304.245	324.309	375.937	high	high	high	high
ENSMUST00000042701	262.425	263.501	199.357	166.59	332.307	319.513	317.09	267.626	284.068	316.176	319.007	296.481	306.204	401.66	high	high	high	high
ENSMUST00000092170	288.985	322.922	292.915	267.088	346.344	342.565	347.315	278.679	227.966	240.494	274.588	346.285	345.273	312.362	high	high	high	high
ENSMUST00000169611	310.788	328.659	290.292	329.559	372.046	332.022	296.531	362.361	271.425	308.67	296.293	392.72	367.191	242.172	high	high	high	high
ENSMUST00000032992	830.089	888.856	877.87	971.475	386.811	353.466	406.676	856.167	767.261	726.173	842.945	391.695	346.862	263.486	high	high	high	high
ENSMUST00000073724	593.43	549.951	493.146	445.448	310.615	301.822	284.959	671.434	547.987	526.335	669.813	352.877	321.292	327.061	high	high	high	high
ENSMUST00000019516	684.209	630.682	480.031	428.246	358.192	348.998	365.286	635.119	618.708	516.327	723.317	366.06	352.897	282.228	high	high	high	high
ENSMUST00000099274	349.636	326.61	402.212	386.598	395.378	377.947	382.441	319.336	284.858	287.092	289.731	386.568	379.102	235.19	high	high	high	high
ENSMUST00000163739	460.236	462.664	386.473	403.8	369.858	333.451	349.766	481.175	385.606	358.396	423.491	372.066	342.573	285.535	high	high	high	high
ENSMUST00000034017	146.276	124.579	110.171	101.403	294.027	299.32	282.508	164.207	130.379	131.662	119.628	282.858	318.592	398.721	high	high	high	high
ENSMUST00000028995	541.104	538.067	443.307	525.122	359.65	366.689	368.009	538.41	446.844	472.231	515.862	403.707	368.461	225.635	high	high	high	high
ENSMUST00000176161	294.138	274.976	496.644	364.869	371.134	358.112	284.142	273.152	246.14	227.672	262.979	300.583	327.962	368.954	high	high	high	high
ENSMUST00000030491	184.332	162.691	286.794	284.29	324.651	334.166	245.884	179.996	160.406	164.186	153.951	270.847	293.816	432.162	high	high	high	high
ENSMUST00000035371	396.413	429.06	375.106	255.318	367.671	316.118	341.324	426.702	348.072	317.427	378.568	373.092	365.126	257.974	high	high	high	high
ENSMUST00000146623	142.312	138.922	140.774	157.536	281.085	292.708	214.025	147.234	133.935	148.862	153.951	230.124	255.54	510.436	high	high	high	high
ENSMUST00000068519	488.777	473.319	335.759	290.628	370.952	334.702	446.839	496.964	397.853	467.54	559.271	367.965	397.049	230.413	high	high	high	high
ENSMUST00000002172	296.121	286.04	358.493	287.911	356.187	323.444	300.752	314.599	262.338	266.451	288.216	321.383	333.203	339.923	high	high	high	high
ENSMUST00000052125	351.618	270.878	245.699	174.739	403.946	360.077	371.549	286.179	223.225	195.147	220.074	335.592	376.878	281.861	high	high	high	high
ENSMUST00000064104	306.427	290.138	303.407	331.37	355.64	332.558	301.977	351.309	292.365	298.976	289.226	348.775	343.05	302.44	high	high	high	high
ENSMUST00000061446	321.491	340.953	264.935	226.345	350.901	353.644	329.207	343.019	278.537	258.945	309.921	366.207	361.314	266.426	high	high	high	high
ENSMUST00000059515	496.309	542.575	645.287	719.779	394.285	368.476	360.93	501.701	507.688	508.196	497.691	371.041	361.155	259.812	high	high	high	high
ENSMUST00000152594	95.932	85.6481	119.789	88.7274	354.182	326.482	304.292	79.3405	71.1158	73.8057	84.2945	299.264	310.333	382.184	high	high	high	high
ENSMUST00000103045	432.487	459.795	643.538	808.506	302.23	301.286	232.269	444.86	418.793	386.229	493.148	250.778	266.817	474.055	high	high	high	high
ENSMUST00000057897	514.941	495.448	444.181	490.717	343.792	333.988	348.54	535.647	458.302	511.636	648.108	367.672	347.973	275.246	high	high	high	high
ENSMUST00000098346	747.239	730.263	502.764	344.951	330.485	331.664	353.442	785.905	675.6	631.727	713.727	362.984	343.05	284.433	high	high	high	high
ENSMUST00000044369	488.381	513.889	552.604	669.983	364.208	357.04	338.601	485.911	415.237	406.244	484.062	339.254	348.45	302.44	high	high	high	high
ENSMUST00000181440	643.775	617.978	727.478	582.161	360.744	365.081	348.813	650.119	544.826	528.524	728.365	370.308	374.814	244.745	high	high	high	high
ENSMUST00000001834	314.752	337.675	324.392	377.544	354.911	351.679	297.621	324.467	299.082	290.219	325.569	308.932	323.833	356.827	high	high	high	high
ENSMUST00000026879	250.137	216.374	348	326.843	374.962	346.139	339.691	290.126	204.656	218.29	211.998	354.195	359.726	274.878	high	high	high	high
ENSMUST00000035027	521.283	547.492	776.443	545.945	428.737	404.216	341.733	510.779	456.722	423.445	542.614	362.984	387.678	237.762	high	high	high	high
ENSMUST00000050552	126.852	118.432	154.764	121.321	349.625	357.576	277.607	123.55	128.008	136.666	117.104	294.87	348.132	345.068	high	high	high	high
ENSMUST00000095737	262.822	302.842	312.151	214.576	401.758	373.301	411.577	320.915	256.017	245.811	216.036	390.084	411.183	186.315	high	high	high	high
ENSMUST00000020537	537.933	564.294	628.674	744.224	425.273	413.866	352.08	495.78	409.311	428.136	473.967	381.295	367.667	238.497	high	high	high	high
ENSMUST00000010049	149.051	131.136	173.126	155.726	322.099	342.744	281.691	146.444	137.886	132.287	116.094	315.963	344.162	327.061	high	high	high	high
ENSMUST00000051477	291.76	283.172	420.573	393.841	365.119	367.225	304.428	285.389	308.564	321.805	331.626	314.791	337.968	333.308	high	high	high	high
ENSMUST00000015011	349.24	348.33	327.015	358.531	339.781	338.455	313.55	352.493	328.318	331.5	343.74	323.287	323.992	338.453	high	high	high	high
ENSMUST00000028767	147.862	155.314	135.528	129.47	257.206	270.55	258.274	138.155	138.281	162.935	154.456	256.784	255.223	472.952	high	high	high	high
ENSMUST00000047309	489.967	515.528	668.895	564.958	357.281	364.366	285.095	519.463	435.782	416.564	525.957	319.479	336.062	328.899	high	high	high	high
ENSMUST00000121820	417.423	412.259	467.79	306.924	405.586	408.862	312.733	421.571	378.494	352.766	435.101	343.356	364.967	275.613	high	high	high	high
ENSMUST00000088615	155.394	138.103	201.106	144.861	332.125	325.767	290.813	151.971	131.959	145.735	135.78	297.214	323.198	363.442	high	high	high	high
ENSMUST00000102926	314.356	316.775	398.714	382.071	308.063	320.406	243.434	301.573	312.119	315.551	322.54	266.892	291.91	424.812	high	high	high	high
ENSMUST00000048657	585.502	595.029	451.176	437.299	395.378	377.054	416.206	582.225	512.034	521.331	547.157	400.484	377.831	205.056	high	high	high	high
ENSMUST00000003572	485.606	484.383	466.041	563.148	418.529	374.195	386.526	470.517	415.237	418.754	498.7	386.275	381.167	215.713	high	high	high	high
ENSMUST00000086023	377.385	372.098	296.412	272.52	378.973	352.572	355.211	347.756	286.834	312.111	354.844	379.683	357.979	245.48	high	high	high	high
ENSMUST00000026723	268.768	301.613	366.362	379.355	348.531	362.401	273.659	300.389	254.437	245.498	309.416	290.622	317.798	374.467	high	high	high	high
ENSMUST00000026665	329.419	307.76	468.664	396.557	288.012	279.306	233.359	323.283	266.684	265.826	316.483	262.497	286.987	433.264	high	high	high	high
ENSMUST00000024954	146.276	106.958	111.045	143.05	403.581	380.449	378.901	64.3408	357.555	467.54	412.387	321.09	368.62	292.885	high	high	high	high
ENSMUST00000029773	376.592	324.971	349.749	545.945	345.979	332.379	297.757	269.205	484.378	438.769	383.616	288.425	309.698	384.389	high	high	high	high
ENSMUST00000014370	347.258	351.198	502.764	613.849	382.618	393.852	321.038	378.94	308.564	297.099	362.416	339.108	367.032	276.348	high	high	high	high
ENSMUST00000034966	708.787	729.853	1145.43	1355.36	400.482	391.35	323.761	699.065	724.591	637.982	779.85	344.088	360.838	275.981	high	high	high	high
ENSMUST00000038356	318.716	307.76	285.046	251.696	347.984	355.789	332.611	328.415	299.872	323.995	375.539	350.826	348.45	281.126	high	high	high	high
ENSMUST00000059680	476.489	468.811	600.694	599.363	405.769	384.559	404.497	507.227	425.905	422.819	490.624	386.861	400.225	192.562	high	high	high	high
ENSMUST00000101801	376.196	370.049	459.92	478.042	343.062	336.847	260.588	362.361	313.305	291.47	369.987	281.686	305.41	392.106	high	high	high	high
ENSMUST00000056882	476.885	457.337	483.528	502.487	354.364	336.847	383.394	423.939	407.731	398.426	478.005	366.5	381.643	230.045	high	high	high	high
ENSMUST00000034164	258.065	289.728	281.548	254.412	324.287	315.76	296.123	266.047	250.881	254.567	257.931	290.768	313.668	373.364	high	high	high	high
ENSMUST00000059498	156.583	148.348	223.839	154.82	399.936	354.18	400.821	181.575	137.491	139.168	140.323	358.736	414.519	203.954	high	high	high	high
ENSMUST00000024829	353.997	396.686	354.121	291.533	356.734	333.451	385.3	392.361	376.519	389.669	423.491	347.311	347.973	281.861	high	high	high	high
ENSMUST00000109554	529.608	538.477	346.252	334.991	309.522	317.369	302.658	567.226	452.376	460.973	485.577	308.932	309.857	354.99	high	high	high	high
ENSMUST00000051454	481.245	452.419	460.795	482.569	411.237	335.417	358.479	474.464	374.148	341.195	409.358	376.461	376.084	221.226	high	high	high	high
ENSMUST00000050952	409.098	430.29	403.086	539.608	388.816	355.967	330.296	406.571	305.798	308.045	342.226	372.359	388.472	212.773	high	high	high	high
ENSMUST00000163242	528.419	579.047	556.976	660.929	373.322	365.975	368.69	525.779	451.981	455.656	541.1	367.965	357.503	248.052	high	high	high	high
ENSMUST00000021046	392.449	388.49	370.734	344.045	367.489	348.998	319.677	374.598	366.246	292.408	335.159	343.942	335.427	293.988	high	high	high	high
ENSMUST00000086545	783.709	776.98	884.865	893.612	399.571	347.211	393.605	874.719	660.982	608.272	775.307	405.171	361.791	205.791	high	high	high	high
ENSMUST00000021595	520.887	531.92	632.172	677.226	360.197	362.579	326.756	504.069	459.487	433.765	536.557	325.631	345.115	301.705	high	high	high	high
ENSMUST00000005798	332.591	347.92	371.608	491.622	387.358	370.442	328.254	353.677	316.86	299.288	347.273	351.705	354.326	266.059	high	high	high	high
ENSMUST00000052455	66.201	55.7328	62.9548	44.3637	312.621	293.602	319.132	61.9724	61.6337	63.1727	77.2279	222.947	290.004	458.253	high	high	high	high
ENSMUST00000035043	191.468	187.688	180.995	214.576	355.276	359.899	334.925	188.286	151.714	150.739	151.427	356.832	364.649	249.154	high	high	high	high
ENSMUST00000029353	250.929	239.323	286.794	270.709	375.874	352.572	419.882	241.574	230.731	253.942	288.216	367.525	400.384	202.484	high	high	high	high
ENSMUST00000109308	522.472	452.419	488.774	431.867	402.852	349.892	366.376	530.121	421.954	421.568	478.51	396.089	381.167	192.929	high	high	high	high
ENSMUST00000002487	331.005	270.878	314.774	219.102	394.649	340.063	416.07	301.573	246.14	274.582	277.112	388.326	383.072	197.707	high	high	high	high
ENSMUST00000190641	577.97	553.639	539.488	614.754	347.802	324.338	333.292	574.725	494.255	511.323	520.405	362.398	343.368	262.751	high	high	high	high
ENSMUST00000020657	210.099	224.57	312.151	317.789	288.741	299.499	232.678	227.759	184.111	198.9	220.074	250.339	276.028	442.084	high	high	high	high
ENSMUST00000058444	903.425	925.328	890.986	922.584	375.509	356.504	387.751	929.981	785.04	713.976	920.677	394.478	359.726	213.508	high	high	high	high
ENSMUST00000096246	830.485	819.6	716.986	623.808	391.915	358.827	405.042	789.063	726.567	675.51	789.441	389.644	380.373	196.972	high	high	high	high
ENSMUST00000047232	149.051	127.038	179.246	161.158	361.291	344.173	314.367	143.287	133.935	148.237	133.761	327.389	346.385	292.885	high	high	high	high
ENSMUST00000069476	585.899	613.88	441.558	446.353	362.749	356.146	413.483	656.04	533.369	603.893	688.994	391.548	379.42	194.767	high	high	high	high
ENSMUST00000028279	93.9499	88.9265	142.523	52.5122	304.053	299.677	336.968	84.0773	76.647	94.4463	106.504	312.301	325.58	327.429	high	high	high	high
ENSMUST00000035540	534.761	485.203	274.553	307.83	330.12	330.414	298.029	551.436	438.548	425.947	453.777	320.358	318.909	325.224	high	high	high	high
ENSMUST00000032185	761.51	656.089	552.604	354.91	402.67	353.108	517.228	602.356	802.423	908.498	878.783	361.812	384.978	217.551	high	high	high	high
ENSMUST00000094807	348.447	358.985	251.819	123.132	339.599	321.3	330.296	196.97	180.95	219.228	221.588	390.23	329.868	242.907	high	high	high	high
ENSMUST00000001042	453.893	473.729	506.262	542.324	360.562	350.606	319.677	405.781	390.742	389.044	446.71	328.707	328.121	306.115	high	high	high	high
ENSMUST00000047714	94.3463	74.5836	94.4323	91.4436	302.777	286.454	206.401	80.9194	74.2765	60.0453	65.6185	251.071	247.758	463.03	high	high	high	high
ENSMUST00000021832	285.814	288.909	222.091	321.411	356.552	349.713	323.217	273.547	262.733	249.876	251.874	333.834	327.327	299.132	high	high	high	high
ENSMUST00000040944	284.228	299.154	339.257	459.934	394.649	367.583	375.089	234.864	629.375	778.087	1104.91	348.922	371.002	239.967	high	high	high	high
ENSMUST00000032920	423.766	478.646	454.674	517.878	338.141	329.341	291.902	432.228	396.668	388.418	442.167	320.944	312.08	326.694	high	high	high	high
ENSMUST00000024897	307.22	295.056	424.071	415.57	374.233	372.229	324.987	277.494	283.278	294.597	320.521	325.778	355.914	277.818	high	high	high	high
ENSMUST00000146598	278.282	246.29	313.9	295.155	316.266	348.105	280.058	250.258	227.176	225.483	225.627	306.295	325.897	327.061	high	high	high	high
ENSMUST00000041840	285.417	295.056	530.744	432.773	399.024	368.119	329.752	358.809	261.943	231.112	280.645	350.094	364.967	244.01	high	high	high	high
ENSMUST00000019354	498.688	509.791	659.277	739.697	367.671	368.119	286.184	495.78	440.918	413.124	523.938	305.27	327.486	324.121	high	high	high	high
ENSMUST00000055241	274.714	283.172	285.92	229.062	341.057	316.296	342.822	258.547	248.51	255.193	267.521	313.18	326.692	316.404	high	high	high	high
ENSMUST00000049005	117.338	104.909	180.121	162.063	347.255	346.139	381.08	110.129	126.428	125.72	119.123	305.124	378.467	272.673	high	high	high	high
ENSMUST00000068697	310.788	303.662	294.664	296.06	335.589	355.253	346.226	312.625	294.34	314.3	366.454	347.311	352.42	255.402	high	high	high	high
ENSMUST00000068664	289.778	291.777	233.458	209.143	315.537	330.95	298.574	287.757	246.93	250.189	264.493	336.031	324.15	294.723	high	high	high	high
ENSMUST00000020343	215.649	202.441	222.965	217.292	361.109	363.115	294.081	206.443	183.716	191.082	217.046	325.338	339.397	289.945	high	high	high	high
ENSMUST00000045557	587.881	572.49	472.161	424.624	395.561	335.417	320.766	581.041	490.699	439.707	566.843	355.074	310.81	288.108	high	high	high	high
ENSMUST00000117146	111.392	113.105	173.126	189.225	280.721	310.935	221.786	135.392	115.366	116.025	119.628	252.243	286.51	413.787	high	high	high	high
ENSMUST00000004508	290.967	281.942	333.136	370.301	314.99	323.802	244.931	267.232	259.178	253.316	281.655	265.28	294.928	391.738	high	high	high	high
ENSMUST00000098817	238.641	242.192	260.563	260.75	310.615	304.502	334.517	230.916	199.914	218.915	231.684	296.042	292.704	362.707	high	high	high	high
ENSMUST00000003038	572.024	608.962	468.664	470.799	348.713	327.733	386.117	583.409	508.478	540.721	572.9	367.965	347.179	235.925	high	high	high	high
ENSMUST00000032065	614.044	585.194	652.282	606.606	390.274	371.514	409.399	528.542	439.733	420.005	481.034	390.67	368.938	191.092	high	high	high	high
ENSMUST00000025912	579.159	550.771	499.267	399.273	303.142	316.654	326.756	540.384	487.934	473.795	567.347	320.065	304.774	325.224	high	high	high	high
ENSMUST00000008748	524.851	521.265	340.131	312.357	322.282	329.341	313.55	552.621	456.722	431.263	532.519	337.203	322.88	289.945	high	high	high	high
ENSMUST00000101492	210.495	214.735	187.99	158.442	333.219	338.276	391.291	214.733	247.72	247.061	237.741	334.42	371.161	243.275	high	high	high	high
ENSMUST00000114459	271.939	262.272	515.006	363.964	311.162	292.887	255.959	227.364	255.622	218.29	301.34	248.874	291.592	407.908	high	high	high	high
ENSMUST00000002699	366.286	329.479	341.005	253.507	348.349	357.576	347.996	339.862	319.626	319.304	345.759	330.612	353.691	263.854	high	high	high	high
ENSMUST00000064910	156.98	133.595	153.015	211.859	294.574	306.289	255.551	139.734	137.491	168.565	160.008	267.331	286.193	393.943	high	high	high	high
ENSMUST00000053766	417.819	388.9	378.603	372.112	326.657	313.616	312.733	415.255	353.209	364.025	434.596	313.473	306.521	327.429	high	high	high	high
ENSMUST00000172107	115.356	116.383	207.226	163.874	334.859	322.908	303.747	98.2875	108.254	117.901	101.456	285.934	326.374	333.676	high	high	high	high
ENSMUST00000044475	92.7607	99.5813	236.081	91.4436	273.611	287.168	221.786	75.3932	100.352	90.3807	87.323	224.119	256.335	464.133	high	high	high	high
ENSMUST00000047226	375.007	373.737	303.407	269.804	350.354	335.774	346.906	366.703	352.418	335.879	343.74	389.644	352.738	200.647	high	high	high	high
ENSMUST00000103172	560.924	577.818	858.634	999.542	419.987	404.216	331.386	549.857	552.728	504.131	591.576	348.922	377.514	216.448	high	high	high	high
ENSMUST00000165443	229.523	246.29	217.719	218.197	306.97	292.172	335.062	244.337	222.83	242.058	240.265	289.011	311.127	342.128	high	high	high	high
ENSMUST00000052449	526.04	515.938	392.593	423.719	322.646	305.574	314.231	580.252	451.981	511.636	563.309	325.192	326.692	289.578	high	high	high	high
ENSMUST00000147545	294.138	257.764	243.95	178.36	368.582	334.345	368.146	260.916	261.548	293.972	262.979	332.369	363.379	245.112	high	high	high	high
ENSMUST00000022450	208.513	216.784	365.488	192.846	329.573	290.921	424.92	216.311	184.901	207.344	274.083	288.571	359.091	292.885	high	high	high	high
ENSMUST00000095267	399.584	401.604	491.398	520.595	331.761	312.901	238.26	388.019	332.664	305.856	342.73	283.444	281.587	375.202	high	high	high	high
ENSMUST00000030074	103.86	79.5012	104.925	93.2543	334.859	333.988	318.043	101.84	92.8456	110.709	124.675	297.214	341.462	300.235	high	high	high	high
ENSMUST00000015049	370.25	328.25	468.664	535.986	381.16	348.105	347.723	379.729	303.032	320.554	336.168	327.243	348.45	263.119	high	high	high	high
ENSMUST00000001675	137.555	119.252	190.613	122.227	315.902	329.699	358.479	144.866	138.281	146.986	171.113	289.011	360.838	288.475	high	high	high	high
ENSMUST00000022601	293.742	284.811	310.402	382.071	314.443	327.733	315.32	285.389	273.796	265.826	273.074	324.313	325.103	288.475	high	high	high	high
ENSMUST00000033809	243.001	287.679	286.794	333.181	334.859	334.881	282.1	262.495	207.421	230.174	268.026	297.946	312.239	327.429	high	high	high	high
ENSMUST00000110855	44.0019	43.029	66.4523	57.0391	312.803	283.058	295.987	43.0255	67.56	122.593	88.8373	238.474	288.257	410.48	high	high	high	high
ENSMUST00000037912	102.671	102.04	138.151	78.7682	263.95	255.36	308.376	96.7086	94.8211	143.233	103.475	244.773	303.186	389.166	high	high	high	high
ENSMUST00000023036	323.869	365.951	380.352	447.259	312.621	329.163	263.72	348.546	329.108	329.937	359.387	297.214	297.945	341.761	high	high	high	high
ENSMUST00000163139	742.085	739.279	785.187	421.908	365.666	312.722	452.149	714.065	591.051	637.043	757.136	381.588	365.602	189.622	high	high	high	high
ENSMUST00000098350	585.899	619.617	566.594	599.363	340.51	301.286	341.052	581.436	498.996	498.501	584.004	363.424	328.439	244.745	high	high	high	high
ENSMUST00000024869	263.218	241.372	265.809	320.505	352.177	297.533	326.62	286.968	290.39	259.258	240.769	312.155	320.498	303.91	high	high	high	high
ENSMUST00000034787	117.735	128.677	366.362	191.941	285.642	252.322	297.076	144.866	156.455	148.55	120.132	274.509	292.863	368.587	high	high	high	high
ENSMUST00000041401	181.557	161.871	198.483	133.091	386.264	353.287	306.743	185.917	137.886	129.785	138.808	329.44	351.467	254.299	high	high	high	high
ENSMUST00000025918	673.506	744.606	768.574	937.07	367.306	352.751	390.474	638.671	601.324	594.511	765.212	366.353	369.096	199.177	high	high	high	high
ENSMUST00000109905	239.037	231.127	216.844	212.765	314.443	330.95	260.861	226.18	227.176	224.857	222.598	281.1	294.61	357.93	high	high	high	high
ENSMUST00000032094	219.613	189.327	143.397	159.347	299.496	314.867	274.748	243.548	197.149	232.988	214.017	281.1	294.928	357.562	high	high	high	high
ENSMUST00000045847	437.244	407.341	382.101	339.518	326.657	367.762	364.47	455.912	382.445	364.963	403.806	360.787	359.091	212.039	high	high	high	high
ENSMUST00000102518	677.866	646.664	534.242	384.787	335.042	311.829	367.873	609.856	645.574	609.21	686.47	349.654	315.098	266.794	high	high	high	high
ENSMUST00000028727	330.608	356.936	533.367	426.435	368.4	360.971	285.095	301.178	262.733	242.996	306.892	303.219	326.215	302.072	high	high	high	high
ENSMUST00000016088	239.037	220.062	135.528	108.646	285.278	298.784	293.264	267.626	188.457	177.947	255.407	252.536	310.333	368.219	high	high	high	high
ENSMUST00000034469	302.067	283.581	279.799	217.292	381.707	354.717	372.639	293.678	233.892	288.03	315.978	344.82	374.02	211.671	high	high	high	high
ENSMUST00000029374	584.313	676.989	755.458	559.526	356.005	288.419	388.976	749.985	598.163	546.35	499.205	354.635	340.985	234.823	high	high	high	high
ENSMUST00000040561	303.256	338.904	245.699	220.008	286.554	299.499	320.766	345.388	280.117	292.095	351.311	288.425	297.786	343.965	high	high	high	high
ENSMUST00000057486	492.741	506.103	471.287	514.257	385.353	343.101	359.16	466.964	389.952	407.182	451.758	382.906	362.585	184.11	high	high	high	high
ENSMUST00000002400	231.109	219.243	206.352	231.778	251.008	273.587	217.974	213.548	169.888	198.587	201.903	241.404	233.782	453.843	high	high	high	high
ENSMUST00000068714	198.603	175.804	183.618	131.28	284.002	277.34	292.175	206.838	191.618	162.623	165.056	278.61	304.616	345.803	high	high	high	high
ENSMUST00000084949	109.41	108.187	149.518	159.347	404.128	319.87	395.239	146.444	168.307	134.477	108.523	324.02	371.002	233.353	high	high	high	high
ENSMUST00000057256	248.947	210.227	218.593	180.171	303.506	265.546	294.353	240.785	190.037	191.082	209.979	294.43	292.863	341.026	high	high	high	high
ENSMUST00000091852	338.537	294.236	380.352	314.168	352.724	299.141	339.418	346.177	273.006	263.011	289.226	313.034	335.744	278.921	high	high	high	high
ENSMUST00000035934	356.375	389.72	330.513	371.207	303.506	295.21	327.573	356.046	337.01	313.674	331.121	303.805	293.498	329.266	high	high	high	high
ENSMUST00000085989	543.879	569.622	697.75	781.345	379.337	373.48	316.001	552.621	470.55	434.39	530.5	342.477	350.514	232.985	high	high	high	high
ENSMUST00000023572	191.864	170.067	270.181	244.453	361.109	300.928	383.939	173.286	192.803	200.777	198.874	324.606	344.479	256.504	high	high	high	high
ENSMUST00000027592	393.638	368	481.779	411.949	375.509	349.713	386.39	382.098	331.084	323.056	354.844	374.849	368.302	181.905	high	high	high	high
ENSMUST00000033236	219.216	206.129	171.377	180.171	373.14	388.669	334.381	168.944	179.765	218.915	186.76	346.139	364.649	212.773	high	high	high	high
ENSMUST00000082432	160.944	165.969	173.126	128.564	260.487	272.515	372.775	159.471	134.725	163.874	144.361	270.114	375.767	277.451	high	high	high	high
ENSMUST00000032151	440.415	447.911	494.895	540.513	290.199	273.587	279.104	458.675	419.188	385.291	457.815	305.856	293.975	323.386	high	high	high	high
ENSMUST00000027286	314.356	268.009	311.277	268.898	295.121	288.598	266.17	342.625	272.216	302.103	320.521	262.644	288.893	370.424	high	high	high	high
ENSMUST00000028781	250.533	211.047	264.935	171.117	331.031	297.176	325.123	266.047	208.211	197.336	205.941	326.217	323.515	271.938	high	high	high	high
ENSMUST00000022816	164.511	146.708	231.709	253.507	280.174	279.842	289.452	169.733	143.417	173.881	181.713	319.772	336.38	265.324	high	high	high	high
ENSMUST00000046514	602.151	624.125	591.076	528.743	347.073	320.943	371.005	584.988	530.998	511.323	601.166	362.105	334.633	224.533	high	high	high	high
ENSMUST00000027494	335.365	334.806	324.392	330.464	328.297	313.258	332.475	401.045	306.193	293.034	309.921	346.578	327.327	247.317	high	high	high	high
ENSMUST00000123285	103.464	103.27	200.231	165.685	386.811	337.74	358.751	109.735	95.6113	94.4463	95.9039	376.168	390.696	153.608	high	high	high	high
ENSMUST00000075317	340.519	306.53	231.709	191.036	333.401	312.365	410.624	298.415	203.47	266.764	265.502	354.928	394.984	170.513	high	high	high	high
ENSMUST00000100507	543.482	604.045	568.342	507.919	325.381	301.107	357.254	556.568	541.27	534.466	572.9	338.522	310.016	271.204	high	high	high	high
ENSMUST00000085585	204.549	186.869	206.352	152.104	318.089	332.379	289.043	182.76	171.073	191.082	195.341	293.405	306.204	319.711	high	high	high	high
ENSMUST00000033088	451.514	433.978	348.875	317.789	347.073	334.166	343.23	452.754	407.731	402.804	414.406	338.668	327.327	253.197	high	high	high	high
ENSMUST00000022242	294.931	313.087	425.82	372.112	373.504	361.686	365.15	274.337	297.501	335.879	354.34	323.727	355.914	238.497	high	high	high	high
ENSMUST00000043235	149.051	150.806	148.643	162.063	262.127	278.412	208.852	147.234	116.946	141.357	144.361	222.361	255.064	439.879	high	high	high	high
ENSMUST00000049020	406.323	399.965	264.935	287.911	274.158	279.306	261.814	467.754	373.358	422.819	455.796	278.757	273.964	364.177	high	high	high	high
ENSMUST00000031805	182.746	195.474	241.327	238.115	347.073	307.183	379.174	192.628	169.098	190.144	196.855	320.065	351.309	245.48	high	high	high	high
ENSMUST00000071103	507.805	582.325	586.704	641.916	398.477	368.476	384.756	498.543	436.967	437.518	519.395	381.441	373.384	161.326	high	high	high	high
ENSMUST00000032425	381.746	386.031	410.955	502.487	344.885	330.771	302.114	406.966	344.122	347.137	394.72	322.262	329.391	263.854	high	high	high	high
ENSMUST00000166811	339.726	337.675	480.031	270.709	275.799	292.172	229.274	313.415	304.218	278.335	304.369	249.607	253.476	412.318	high	high	high	high
ENSMUST00000180252	833.657	786.816	590.202	628.335	373.869	338.634	368.146	951.297	661.772	724.297	840.421	463.179	387.996	63.9423	high	high	high	high
ENSMUST00000046893	652.496	652.401	628.674	574.012	346.526	319.156	330.569	724.328	561.42	525.709	654.166	373.678	317.956	223.063	high	high	high	high
ENSMUST00000061222	129.627	120.481	143.397	154.82	354	318.262	320.766	156.707	130.379	128.535	108.018	303.952	345.75	263.854	high	high	high	high
ENSMUST00000007757	141.916	114.744	230.834	164.78	369.312	285.382	307.015	159.471	161.986	157.932	122.151	310.543	308.427	294.355	high	high	high	high
ENSMUST00000025490	235.866	190.967	146.895	159.347	382.254	361.15	369.916	216.706	178.185	185.14	198.37	349.068	364.014	199.912	high	high	high	high
ENSMUST00000027146	67.7866	68.4366	100.553	73.3359	312.803	288.241	366.376	86.0509	56.1025	66.9255	80.7612	264.401	347.179	301.337	high	high	high	high
ENSMUST00000033158	68.183	54.0936	51.588	50.7014	266.685	267.154	251.33	74.6038	72.3011	87.2534	79.7517	206.248	278.093	428.487	high	high	high	high
ENSMUST00000150779	323.473	242.192	292.915	213.67	331.578	338.455	236.218	297.231	256.807	253.629	240.265	295.602	307.633	308.687	high	high	high	high
ENSMUST00000084524	277.489	275.795	268.432	260.75	279.262	310.578	282.917	282.231	257.597	232.988	300.835	285.495	292.704	331.838	high	high	high	high
ENSMUST00000037270	160.547	148.757	141.648	165.685	320.641	303.787	291.902	173.286	157.64	168.252	153.446	278.61	309.063	322.284	high	high	high	high
ENSMUST00000035842	803.133	683.546	664.523	620.187	398.66	337.025	335.47	881.035	624.634	630.476	663.756	400.777	351.467	157.651	high	high	high	high
ENSMUST00000039810	199.396	184	195.86	174.739	266.32	253.394	273.522	202.496	189.247	207.344	219.065	244.333	267.452	397.251	high	high	high	high
ENSMUST00000021536	382.539	375.377	461.669	484.379	368.582	362.758	286.865	356.046	374.938	323.369	388.158	302.047	329.709	275.246	high	high	high	high
ENSMUST00000022063	199.396	170.886	200.231	168.401	371.317	396.711	343.23	190.259	164.752	170.441	180.198	364.889	371.002	169.778	high	high	high	high
ENSMUST00000108775	355.583	342.593	260.563	204.616	308.975	328.269	284.959	395.124	323.577	321.18	317.492	299.411	310.81	295.09	high	high	high	high
ENSMUST00000002818	338.933	307.35	306.905	367.585	333.401	333.451	291.494	339.072	305.403	324.62	342.226	326.657	319.545	259.077	high	high	high	high
ENSMUST00000043983	246.965	288.089	254.443	141.24	359.286	337.204	416.751	209.601	205.841	249.251	263.483	321.823	330.98	252.094	high	high	high	high
ENSMUST00000167866	424.162	452.829	473.036	599.363	373.14	336.489	369.235	505.648	424.324	393.422	468.92	384.371	352.738	167.573	high	high	high	high
ENSMUST00000097713	210.495	199.572	195.86	157.536	321.188	293.066	321.038	215.917	165.542	181.7	211.998	312.448	324.627	266.426	high	high	high	high
ENSMUST00000054674	466.975	349.559	471.287	376.639	297.309	292.887	327.437	415.255	353.209	395.924	371.501	323.287	314.462	265.324	high	high	high	high
ENSMUST00000030121	143.502	111.875	96.181	74.2413	287.647	272.873	275.837	129.866	126.823	156.368	131.742	251.364	301.439	350.213	high	high	high	high
ENSMUST00000099087	263.615	294.236	447.679	283.385	292.751	229.449	372.094	262.1	246.93	239.869	321.53	240.671	313.51	348.743	high	high	high	high
ENSMUST00000022286	274.318	318.414	317.397	440.016	311.891	317.726	249.696	307.889	261.548	263.949	295.788	282.419	295.245	325.224	high	high	high	high
ENSMUST00000005606	688.966	653.221	729.227	782.25	346.161	301.107	351.263	690.776	655.056	595.449	736.946	354.488	345.75	202.484	high	high	high	high
ENSMUST00000084502	261.236	288.499	243.076	299.681	291.111	293.066	285.367	260.916	261.548	266.451	243.293	274.802	272.852	354.622	high	high	high	high
ENSMUST00000102824	146.276	177.033	187.99	139.429	263.95	302.537	288.635	285.389	155.27	206.719	231.179	295.456	306.839	299.867	high	high	high	high
ENSMUST00000022553	418.216	417.996	394.342	475.326	323.74	286.632	307.968	423.939	323.182	325.871	358.378	333.248	302.551	265.691	high	high	high	high
ENSMUST00000040445	256.083	298.744	264.061	274.331	332.125	349.892	301.433	281.442	232.312	250.814	281.15	310.983	320.18	269.734	high	high	high	high
ENSMUST00000061578	125.663	134.414	125.035	111.362	321.188	305.396	321.174	116.84	138.676	139.168	127.704	326.071	337.491	237.027	high	high	high	high
ENSMUST00000040853	116.149	119.252	97.9298	102.308	303.506	300.571	267.532	116.05	120.107	124.782	130.732	274.069	300.804	325.591	high	high	high	high
ENSMUST00000035214	490.363	454.878	436.312	438.205	319.183	296.997	352.489	498.937	424.324	445.962	517.881	327.096	327.486	245.847	high	high	high	high
ENSMUST00000022511	277.886	287.679	320.895	344.951	303.506	279.484	295.578	287.757	292.76	275.52	238.245	286.227	292.228	321.549	high	high	high	high
ENSMUST00000113658	195.828	164.33	194.985	114.984	347.255	307.183	359.024	190.654	178.185	177.947	149.913	305.856	334.95	258.342	high	high	high	high
ENSMUST00000028536	161.34	144.25	198.483	194.657	324.651	303.787	251.875	158.681	145.787	127.909	125.18	285.934	304.774	307.584	high	high	high	high
ENSMUST00000001566	278.282	312.677	431.94	586.687	310.98	306.468	236.626	283.021	361.9	360.585	361.406	250.193	275.711	371.527	high	high	high	high
ENSMUST00000062967	338.537	310.628	250.945	239.021	338.323	334.345	283.87	269.995	207.421	206.093	241.779	314.791	306.045	275.613	high	high	high	high
ENSMUST00000028117	220.802	240.552	348	357.626	310.251	277.161	309.193	258.547	219.274	202.966	224.112	322.848	310.81	262.384	high	high	high	high
ENSMUST00000096243	338.537	375.377	359.367	401.084	293.845	308.434	252.283	363.545	294.34	303.979	346.768	278.317	284.763	332.941	high	high	high	high
ENSMUST00000084289	147.069	114.334	97.0554	86.0113	276.528	272.694	242.344	191.444	143.812	111.647	146.38	295.016	293.975	306.115	high	high	high	high
ENSMUST00000034567	154.205	172.116	171.377	182.887	277.075	270.371	257.321	151.576	154.479	184.514	165.56	259.274	257.129	378.509	high	high	high	high
ENSMUST00000050918	102.671	74.5836	92.6835	144.861	261.398	279.484	265.217	73.0249	146.578	160.434	121.647	194.09	344.003	356.46	high	high	high	high
ENSMUST00000029815	237.848	189.737	301.659	207.332	287.83	321.836	299.527	215.127	173.048	208.595	169.094	317.868	324.627	251.727	high	high	high	high
ENSMUST00000044352	348.447	364.722	340.131	328.654	350.536	341.493	359.977	415.255	346.097	299.288	382.606	366.939	364.491	162.428	high	high	high	high
ENSMUST00000167290	246.569	247.929	253.568	311.451	312.438	364.724	283.325	253.021	231.521	214.224	245.817	299.557	305.41	288.475	high	high	high	high
ENSMUST00000106746	59.462	55.323	48.0905	47.0799	222.754	224.267	209.396	64.3408	58.473	54.7288	50.9805	215.476	243.153	434.367	high	high	high	high
ENSMUST00000023069	281.85	274.156	327.89	281.574	354.182	337.919	314.095	314.599	233.497	212.661	271.559	320.211	340.032	232.618	high	high	high	high
ENSMUST00000042834	390.863	379.884	469.538	554.094	347.255	349.534	269.846	373.808	351.233	328.998	358.378	293.259	310.174	288.843	high	high	high	high
ENSMUST00000035612	549.429	561.016	388.222	451.786	316.813	316.118	335.47	624.856	534.159	528.837	577.947	364.156	335.903	191.827	high	high	high	high
ENSMUST00000033642	336.555	368	471.287	411.043	378.608	307.183	379.037	388.019	336.615	356.206	352.825	379.683	350.356	161.693	high	high	high	high
ENSMUST00000146444	97.914	78.2718	106.673	74.2413	299.678	288.598	248.743	100.261	109.834	112.898	110.037	244.626	297.628	349.478	high	high	high	high
ENSMUST00000035724	677.866	643.386	403.96	301.492	331.031	347.211	321.447	654.066	551.543	569.805	604.195	323.141	320.974	247.317	high	high	high	high
ENSMUST00000172298	117.735	110.236	191.488	169.306	296.579	311.293	242.753	119.998	103.118	117.589	105.494	255.319	280.157	354.99	high	high	high	high
ENSMUST00000007042	528.419	542.985	632.172	637.389	370.77	350.07	355.075	526.963	474.105	448.464	516.872	349.947	353.85	186.315	high	high	high	high
ENSMUST00000015333	116.545	104.909	166.131	127.659	298.22	295.746	251.33	133.024	100.352	110.709	115.085	278.903	296.198	314.934	high	high	high	high
ENSMUST00000097580	254.497	213.506	209.849	239.021	317.907	300.571	280.602	192.628	222.039	212.661	189.789	280.222	283.016	326.694	high	high	high	high
ENSMUST00000070923	658.046	683.546	946.071	1056.58	419.987	407.254	322.536	661.96	582.755	530.088	714.736	357.125	365.92	166.838	high	high	high	high
ENSMUST00000105686	223.577	211.457	226.463	258.939	284.913	296.818	203.406	221.838	183.716	185.765	191.808	266.013	256.811	366.382	high	high	high	high
ENSMUST00000036615	354.393	314.316	375.98	347.667	333.037	306.111	337.376	286.968	380.865	345.573	343.74	336.031	328.121	224.533	high	high	high	high
ENSMUST00000025350	83.2467	56.1426	79.5679	75.1467	302.048	225.696	316.001	91.1824	84.1537	81.9368	62.0852	220.164	269.834	397.986	high	high	high	high
ENSMUST00000102889	95.1391	102.45	147.769	119.51	294.574	279.484	237.035	106.182	85.7341	93.5081	110.037	259.567	275.552	352.785	high	high	high	high
ENSMUST00000143178	164.908	154.085	270.181	264.372	387.722	354.359	335.878	166.181	154.084	165.125	145.875	341.598	360.679	185.58	high	high	high	high
ENSMUST00000024238	623.161	597.898	370.734	258.034	278.715	270.013	296.94	616.172	521.121	548.852	504.757	296.921	293.498	296.56	high	high	high	high
ENSMUST00000105691	535.95	545.853	931.207	743.319	335.406	331.128	255.006	523.411	481.217	443.772	633.975	271.14	292.545	323.019	high	high	high	high
ENSMUST00000033905	263.615	245.88	334.01	268.898	308.246	335.774	286.32	273.942	260.758	258.633	302.35	281.833	324.309	280.023	high	high	high	high
ENSMUST00000090559	380.953	364.722	285.046	249.885	344.338	309.148	329.888	366.703	285.253	285.841	355.349	332.369	327.327	226.37	high	high	high	high
ENSMUST00000029125	342.104	352.428	419.699	446.353	358.01	339.348	360.794	371.835	305.403	318.365	308.912	373.824	354.167	157.651	high	high	high	high
ENSMUST00000006912	200.981	202.031	180.121	192.846	305.329	302.715	286.456	208.417	175.024	197.962	197.36	297.067	307.474	280.758	high	high	high	high
ENSMUST00000020969	338.537	331.938	354.995	410.138	370.952	351.679	350.719	335.52	269.845	268.015	286.197	361.227	362.585	160.591	high	high	high	high
ENSMUST00000065080	670.731	645.025	500.141	534.175	343.609	321.836	335.47	644.592	537.715	527.898	577.442	350.973	323.833	209.466	high	high	high	high
ENSMUST00000120705	209.306	204.9	155.638	168.401	284.731	327.376	253.1	201.312	172.653	195.46	196.351	265.28	283.493	334.778	high	high	high	high
ENSMUST00000030538	459.443	491.35	469.538	563.148	332.672	338.455	329.071	445.649	437.362	420.005	484.062	339.547	324.945	218.653	high	high	high	high
ENSMUST00000023165	135.97	147.118	135.528	62.4714	307.152	303.251	275.973	102.63	126.033	134.789	126.189	277.145	326.85	278.553	high	high	high	high
ENSMUST00000010198	287.796	281.942	265.809	293.344	306.423	313.08	257.593	294.073	257.992	249.563	306.388	271.433	287.304	323.019	high	high	high	high
ENSMUST00000022380	390.863	411.439	526.372	713.441	342.151	333.63	298.574	431.439	356.369	339.319	393.711	302.487	321.768	257.239	high	high	high	high
ENSMUST00000028392	131.213	121.711	160.01	158.442	285.642	276.447	234.584	136.576	136.305	125.407	133.761	255.319	272.534	353.52	high	high	high	high
ENSMUST00000067246	336.555	317.595	309.528	320.505	302.595	275.374	283.325	330.783	294.34	263.636	311.435	300.143	298.422	282.596	high	high	high	high
ENSMUST00000112529	134.78	129.497	163.508	182.887	270.148	294.495	238.396	142.892	123.267	142.92	118.618	270.554	328.28	282.228	high	high	high	high
ENSMUST00000103232	409.891	423.323	342.754	335.897	304.782	297.533	298.165	400.65	335.035	373.407	385.635	303.805	286.193	291.048	high	high	high	high
ENSMUST00000048781	677.47	675.76	576.212	622.903	375.509	360.971	371.549	668.276	542.456	508.196	586.023	384.81	332.091	162.796	high	high	high	high
ENSMUST00000020027	419.405	390.129	629.548	592.12	392.28	321.121	392.652	425.518	360.715	340.257	385.635	372.652	370.843	135.969	high	high	high	high
ENSMUST00000036116	623.558	597.488	569.217	688.09	366.577	351.143	329.343	622.488	519.145	503.192	593.595	351.852	340.509	187.05	high	high	high	high
ENSMUST00000001416	303.652	284.811	299.036	308.735	377.514	373.301	305.245	279.863	236.658	246.749	264.493	334.127	343.368	201.014	high	high	high	high
ENSMUST00000139129	76.5077	68.4366	117.166	63.3767	288.741	302	248.471	71.8407	77.8323	73.8057	66.1232	229.392	271.105	377.774	high	high	high	high
ENSMUST00000108639	130.816	120.481	111.92	86.9167	269.601	278.948	245.067	144.471	107.069	119.152	124.17	272.751	284.604	320.446	high	high	high	high
ENSMUST00000061639	168.476	206.539	202.855	151.199	271.242	287.168	328.254	241.969	199.519	243.621	217.046	294.137	317.798	265.691	high	high	high	high
ENSMUST00000085272	389.674	395.867	429.317	523.311	307.517	312.186	257.457	419.597	336.615	298.037	391.187	298.825	288.575	288.108	high	high	high	high
ENSMUST00000059472	386.899	394.227	405.709	427.34	374.598	324.338	376.723	357.624	387.186	416.877	629.432	340.865	352.579	180.802	high	high	high	high
ENSMUST00000055117	329.816	326.201	260.563	265.277	305.511	319.334	287.41	331.572	282.488	282.713	322.035	292.233	289.051	292.885	high	high	high	high
ENSMUST00000065263	128.438	132.365	172.251	93.2543	310.251	287.347	319.813	149.602	143.417	156.055	161.522	330.905	330.821	212.039	high	high	high	high
ENSMUST00000060798	370.25	388.08	283.297	349.477	374.233	353.823	366.784	403.413	344.912	358.083	417.939	355.66	353.214	164.266	high	high	high	high
ENSMUST00000039568	156.583	176.624	124.161	162.063	242.258	271.979	271.344	249.469	203.47	192.333	201.398	285.202	314.462	273.041	high	high	high	high
ENSMUST00000022264	144.691	165.969	217.719	140.334	334.677	281.45	366.92	123.945	105.488	111.96	140.827	303.366	348.926	220.123	high	high	high	high
ENSMUST00000114513	153.808	156.544	179.246	94.1597	327.021	291.457	316.409	146.444	141.837	148.862	141.332	277.731	298.263	296.192	high	high	high	high
ENSMUST00000000724	355.186	353.657	419.699	343.14	283.637	250.535	280.874	353.677	281.303	293.034	311.94	272.311	261.258	338.453	high	high	high	high
ENSMUST00000070181	533.176	533.969	366.362	294.249	327.75	345.782	454.736	481.175	395.878	522.895	527.471	328.414	351.467	191.459	high	high	high	high
ENSMUST00000088307	177.989	143.02	160.885	159.347	229.134	284.131	221.514	148.418	124.453	142.295	140.323	224.119	252.046	395.046	high	high	high	high
ENSMUST00000033828	213.667	242.601	156.513	164.78	300.772	309.148	267.396	245.521	223.225	257.382	243.293	314.791	313.668	241.805	high	high	high	high
ENSMUST00000041589	223.181	190.967	179.246	212.765	358.01	300.035	313.005	206.443	171.073	156.681	140.827	287.985	304.933	277.083	high	high	high	high
ENSMUST00000110690	110.599	115.154	180.995	134.902	291.475	303.073	254.462	116.05	122.872	134.477	132.751	251.804	291.751	324.856	high	high	high	high
ENSMUST00000099353	247.758	257.354	267.558	290.628	285.095	309.327	255.278	250.653	244.164	246.436	218.055	254.441	283.493	330.369	high	high	high	high
ENSMUST00000031061	660.028	706.905	873.499	884.558	345.797	307.898	396.465	682.486	621.868	574.183	718.27	343.209	334.156	190.724	high	high	high	high
ENSMUST00000163119	55.4978	48.7662	82.1911	67.9036	306.241	314.509	243.297	48.9464	48.2007	47.8486	45.4282	277.145	301.439	288.843	high	high	high	high
ENSMUST00000070368	321.491	306.53	302.533	267.993	321.735	333.63	293.264	343.809	293.155	299.288	377.559	310.251	318.433	238.497	high	high	high	high
ENSMUST00000035648	222.784	218.423	248.322	239.926	315.537	314.509	327.165	236.443	240.213	225.17	247.836	313.473	330.186	223.431	high	high	high	high
ENSMUST00000049484	62.6333	55.323	48.9649	21.7292	263.221	236.597	263.72	71.8407	67.1649	52.8524	54.5138	223.386	280.475	362.34	high	high	high	high
ENSMUST00000099078	166.89	164.74	146.895	107.74	315.902	265.189	320.357	183.154	190.037	172.318	158.494	298.092	308.745	259.077	high	high	high	high
ENSMUST00000094993	142.312	121.711	146.02	167.496	304.965	264.831	298.438	168.944	148.158	163.248	148.399	265.72	293.657	306.482	high	high	high	high
ENSMUST00000029078	463.803	532.74	501.016	655.497	347.255	318.083	282.78	453.938	423.534	424.07	489.11	326.657	331.774	207.261	high	high	high	high
ENSMUST00000115832	385.314	376.606	348	296.965	309.339	300.928	343.367	397.097	358.345	339.944	338.692	327.096	331.774	206.526	high	high	high	high
ENSMUST00000029569	97.914	89.3363	155.638	89.6328	323.922	296.461	298.982	110.129	99.5621	114.774	91.3611	291.94	329.868	242.54	high	high	high	high
ENSMUST00000090543	87.6073	72.1248	112.794	97.7812	306.787	310.399	282.917	88.814	75.8569	87.8788	93.8849	245.652	317.162	301.337	high	high	high	high
ENSMUST00000101448	667.956	683.546	667.147	657.307	311.527	285.203	331.93	695.118	545.616	473.795	615.299	306.881	282.54	274.511	high	high	high	high
ENSMUST00000122222	141.123	138.103	141.648	54.3229	318.454	331.664	340.371	129.471	116.551	145.11	131.237	299.557	338.603	225.635	high	high	high	high
ENSMUST00000042390	348.051	358.985	248.322	276.141	304.235	313.795	295.306	361.966	326.343	325.871	378.568	323.287	320.18	218.653	high	high	high	high
ENSMUST00000004054	90.7786	86.0579	125.91	88.7274	320.277	321.121	298.438	107.761	88.4997	100.388	88.3325	275.388	324.309	262.016	high	high	high	high
ENSMUST00000170757	172.44	184.82	189.739	201.9	227.858	244.281	302.114	223.417	185.296	215.475	240.769	240.378	257.605	362.707	high	high	high	high
ENSMUST00000028617	355.583	345.871	482.654	414.665	339.781	314.867	354.667	328.415	290.785	320.242	337.178	325.631	342.097	192.562	high	high	high	high
ENSMUST00000180588	429.315	379.475	299.91	264.372	354.182	294.853	382.714	402.624	317.256	350.577	384.625	367.525	335.744	156.548	high	high	high	high
ENSMUST00000076622	158.169	174.575	185.367	330.464	284.913	298.069	212.256	235.258	162.381	155.43	178.684	266.013	274.758	318.976	high	high	high	high
ENSMUST00000136835	101.482	96.7127	156.513	122.227	246.451	244.638	224.917	135.392	119.712	129.785	122.656	252.683	282.699	324.121	high	high	high	high
ENSMUST00000007959	525.644	550.771	650.533	726.116	328.297	328.09	291.766	504.069	499.786	485.679	579.461	295.163	313.51	250.624	high	high	high	high
ENSMUST00000095797	344.879	296.695	280.674	320.505	265.044	274.66	281.964	351.704	325.947	372.469	386.644	265.134	274.44	319.711	high	high	high	high
ENSMUST00000020755	121.302	142.61	243.95	172.928	339.417	322.015	289.724	158.681	140.651	128.847	133.761	314.206	329.55	215.346	high	high	high	high
ENSMUST00000011302	426.937	431.519	285.92	301.492	256.294	268.048	244.387	438.939	387.186	351.203	433.587	273.63	256.176	328.899	high	high	high	high
ENSMUST00000018875	262.822	302.432	282.422	235.399	315.719	301.107	293.672	268.416	259.573	276.146	307.902	300.729	291.434	265.324	high	high	high	high
ENSMUST00000055242	861.802	938.441	1028.26	1126.3	314.99	301.822	352.352	867.614	762.915	720.857	891.906	356.686	310.968	189.622	high	high	high	high
ENSMUST00000027965	265.993	293.007	348.875	307.83	298.585	292.529	321.719	333.941	278.142	324.62	356.863	328.707	343.685	184.845	high	high	high	high
ENSMUST00000024832	325.059	351.198	395.217	398.368	301.501	308.434	246.701	364.73	321.997	296.787	316.988	267.038	285.875	303.91	high	high	high	high
ENSMUST00000053764	139.141	97.9421	99.6785	80.579	282.179	241.6	250.105	140.918	106.674	111.96	110.037	246.238	247.599	361.972	high	high	high	high
ENSMUST00000048860	361.132	333.167	309.528	325.937	315.719	312.365	282.1	381.308	308.959	325.246	358.883	306.881	324.309	224.533	high	high	high	high
ENSMUST00000152782	89.9858	106.548	110.171	73.3359	225.306	274.481	290.405	125.129	92.8456	159.808	157.484	249.167	297.945	307.952	high	high	high	high
ENSMUST00000102632	598.584	514.708	480.905	449.975	319.183	292.529	327.301	641.435	541.27	546.975	538.576	320.358	313.351	220.858	high	high	high	high
ENSMUST00000076270	76.9041	84.0089	98.8041	86.0113	270.695	281.271	226.551	67.8934	61.2386	79.435	82.7802	255.173	267.928	331.103	high	high	high	high
ENSMUST00000107749	692.137	733.132	605.066	507.014	353.088	317.011	383.122	676.171	549.962	556.357	632.966	369.137	348.609	135.969	high	high	high	high
ENSMUST00000020270	328.626	324.152	359.367	371.207	277.622	290.921	275.837	384.466	351.233	349.013	404.311	297.067	293.022	263.486	high	high	high	high
ENSMUST00000024906	566.078	536.018	690.755	666.361	309.522	263.223	355.211	612.619	548.777	521.956	569.366	329.586	307.157	216.816	high	high	high	high
ENSMUST00000026743	617.215	678.219	849.89	955.178	388.269	365.438	338.738	629.198	585.125	537.906	661.232	353.756	348.132	151.404	high	high	high	high
ENSMUST00000087689	496.309	488.481	508.885	489.812	330.485	326.303	328.663	522.621	413.262	462.849	552.205	250.046	319.068	284.065	high	high	high	high
ENSMUST00000121805	216.442	195.884	296.412	397.463	278.715	263.402	245.748	169.733	378.889	382.476	251.874	254.441	285.081	312.729	high	high	high	high
ENSMUST00000053713	362.322	367.181	292.915	316.884	284.549	290.742	298.301	314.599	257.992	287.404	286.702	289.157	272.375	290.313	high	high	high	high
ENSMUST00000020909	269.164	274.976	315.649	363.058	306.97	299.32	263.039	265.653	330.293	297.412	337.683	249.167	285.557	316.772	high	high	high	high
ENSMUST00000021920	269.957	277.844	249.196	235.399	301.683	269.835	284.959	236.048	219.274	216.413	214.522	271.872	272.534	305.38	high	high	high	high
ENSMUST00000043896	22.5955	19.6704	32.3518	17.2023	200.697	214.974	164.876	19.7364	31.2119	31.8991	34.8283	164.647	208.371	475.892	high	high	high	high
ENSMUST00000001583	180.368	159.002	164.382	228.156	293.845	267.69	242.208	217.496	179.765	175.132	191.808	277.438	306.204	264.589	high	high	high	high
ENSMUST00000027856	395.224	380.294	387.347	435.489	291.84	258.219	283.734	430.649	338.985	344.01	416.93	282.858	285.24	279.656	high	high	high	high
ENSMUST00000088896	139.537	130.726	111.92	80.579	270.877	240.171	199.866	161.049	127.613	128.222	120.132	248.581	250.617	348.008	high	high	high	high
ENSMUST00000024123	348.843	328.659	282.422	229.967	288.377	305.932	288.635	357.23	304.613	322.118	332.13	325.192	307.633	214.243	high	high	high	high
ENSMUST00000023071	415.837	444.633	473.036	529.648	332.307	327.018	281.011	431.044	360.32	364.65	391.692	302.926	297.786	245.847	high	high	high	high
ENSMUST00000055128	301.274	265.96	284.171	269.804	313.532	288.598	332.066	313.415	261.153	278.022	306.388	318.454	338.444	189.254	high	high	high	high
ENSMUST00000093162	296.517	224.16	140.774	160.253	319.547	302.179	346.634	305.126	221.644	236.428	250.36	286.52	314.145	245.48	high	high	high	high
ENSMUST00000003947	633.468	676.579	716.986	483.474	386.446	371.693	322.127	747.222	478.846	517.891	649.623	388.619	350.038	106.938	high	high	high	high
ENSMUST00000013693	176.8	179.902	224.714	232.683	314.626	330.592	236.49	212.364	181.345	167.939	176.16	304.831	304.139	236.292	high	high	high	high
ENSMUST00000171737	279.868	318.414	271.93	330.464	307.881	291.457	291.63	217.101	293.945	276.459	244.807	259.421	271.74	313.464	high	high	high	high
ENSMUST00000013294	173.233	167.198	106.673	133.091	286.189	318.977	267.94	162.234	138.676	161.685	179.694	289.303	294.928	259.812	high	high	high	high
ENSMUST00000021574	203.36	220.882	230.834	259.845	283.09	282.165	279.513	206.838	214.533	211.722	191.808	273.923	291.592	278.186	high	high	high	high
ENSMUST00000032106	545.861	539.706	531.619	502.487	299.131	323.266	330.432	550.252	444.474	464.1	553.214	340.133	300.804	202.484	high	high	high	high
ENSMUST00000042021	169.665	163.1	146.895	163.874	314.808	327.197	292.855	216.706	154.479	173.881	160.008	307.907	310.016	225.268	high	high	high	high
ENSMUST00000114976	246.569	239.323	210.724	202.806	247.727	249.463	289.588	322.099	312.515	320.242	331.121	312.301	331.297	199.544	high	high	high	high
ENSMUST00000042012	518.112	559.377	483.528	422.813	297.855	272.694	330.569	513.148	470.55	479.737	527.976	311.276	298.104	233.353	high	high	high	high
ENSMUST00000102729	68.183	47.9466	96.181	63.3767	278.169	275.196	212.256	62.3672	60.4484	72.8675	64.6089	218.259	256.335	367.852	high	high	high	high
ENSMUST00000042780	291.76	263.911	264.061	271.615	269.419	243.566	263.72	336.704	269.055	274.895	337.178	273.63	281.428	287.373	high	high	high	high
ENSMUST00000070481	176.007	143.84	114.543	112.267	294.757	290.742	304.973	166.97	152.109	131.662	129.723	283.151	283.651	275.613	high	high	high	high
ENSMUST00000090791	148.655	148.757	122.412	105.93	290.746	308.255	315.048	156.313	141.837	157.932	155.465	304.245	318.274	219.756	high	high	high	high
ENSMUST00000025833	143.898	163.92	106.673	49.796	277.986	313.616	258.41	250.258	154.479	214.537	185.246	377.193	282.381	182.64	high	high	high	high
ENSMUST00000072113	237.848	185.229	257.94	232.683	295.668	290.385	302.658	228.548	203.075	204.529	183.732	308.2	304.457	228.208	high	high	high	high
ENSMUST00000053015	566.474	593.39	707.368	738.792	343.792	333.094	324.306	548.673	527.442	485.054	607.728	326.51	314.304	199.177	high	high	high	high
ENSMUST00000025684	158.565	156.134	173.126	145.766	249.185	308.255	277.743	145.655	124.058	181.387	163.541	235.691	268.246	335.513	high	high	high	high
ENSMUST00000032477	355.979	339.314	279.799	341.329	327.021	307.004	322.264	345.388	290.39	289.906	331.121	304.245	318.115	216.816	high	high	high	high
ENSMUST00000046399	349.24	340.953	347.126	377.544	374.233	348.641	298.165	344.993	290.39	291.47	346.768	326.51	353.85	158.753	high	high	high	high
ENSMUST00000069107	95.5355	99.1715	106.673	101.403	247.18	255.003	230.499	114.077	100.352	111.647	90.8563	235.251	249.188	354.622	high	high	high	high
ENSMUST00000025264	256.083	254.076	238.704	195.562	277.622	285.56	283.734	293.678	233.497	239.869	242.788	293.844	274.44	270.469	high	high	high	high
ENSMUST00000022563	262.029	238.913	303.407	251.696	353.27	302.358	360.385	246.706	242.189	216.726	202.408	295.456	325.262	217.918	high	high	high	high
ENSMUST00000060253	424.558	393.408	289.417	306.019	317.725	309.506	347.996	387.229	319.231	348.075	355.854	335.299	283.493	219.021	high	high	high	high
ENSMUST00000068975	498.291	471.27	442.433	463.556	285.095	269.477	318.86	535.252	397.853	434.703	528.481	317.721	287.781	232.25	high	high	high	high
ENSMUST00000094646	102.275	106.138	147.769	141.24	294.21	291.279	255.142	112.892	97.9818	102.265	81.2659	262.351	280.793	294.355	high	high	high	high
ENSMUST00000057792	152.223	160.642	176.623	140.334	268.507	284.667	213.753	153.944	131.959	141.357	164.046	251.071	266.34	320.079	high	high	high	high
ENSMUST00000047057	232.694	259.813	293.789	321.411	239.706	266.261	196.462	297.231	242.189	240.494	292.255	233.64	248.235	355.357	high	high	high	high
ENSMUST00000023150	109.014	105.319	99.6785	115.889	295.668	289.849	282.236	114.471	99.9572	123.843	153.951	257.37	336.856	242.907	high	high	high	high
ENSMUST00000111915	208.91	214.735	194.111	141.24	332.307	313.616	310.146	226.18	169.888	200.777	195.846	326.071	322.086	188.887	high	high	high	high
ENSMUST00000030367	159.358	164.33	165.256	133.997	244.628	249.999	191.561	143.681	131.959	142.92	140.827	212.4	224.571	399.823	high	high	high	high
ENSMUST00000029303	139.537	131.956	151.267	163.874	295.85	260.721	288.226	122.761	134.33	124.782	155.465	267.331	308.11	261.281	high	high	high	high
ENSMUST00000055947	227.145	209.408	154.764	203.711	239.888	253.394	217.021	250.653	265.104	261.135	242.788	267.185	258.558	310.157	high	high	high	high
ENSMUST00000102590	329.816	298.334	256.191	262.561	368.765	349.534	359.704	336.309	285.649	300.539	343.74	344.82	346.226	144.789	high	high	high	high
ENSMUST00000090243	382.935	377.835	329.639	323.221	342.698	297.89	361.338	367.887	352.023	369.654	389.673	354.635	337.809	142.951	high	high	high	high
ENSMUST00000002091	407.116	439.715	487.026	525.122	343.245	342.565	277.471	419.202	355.579	343.071	435.606	293.844	313.668	227.473	high	high	high	high
ENSMUST00000160597	206.531	190.967	277.176	230.872	327.203	272.694	309.057	201.707	167.912	175.758	201.398	307.028	310.174	217.551	high	high	high	high
ENSMUST00000030865	212.081	195.474	112.794	116.794	254.654	282.88	229.41	217.89	209.001	210.159	212.503	292.966	282.063	259.444	high	high	high	high
ENSMUST00000029783	124.077	116.383	109.297	74.2413	267.596	276.447	268.349	125.524	96.4014	126.971	139.313	254.001	283.175	296.927	high	high	high	high
ENSMUST00000001184	217.631	195.474	135.528	157.536	314.079	295.746	303.475	208.417	157.245	260.822	186.255	274.802	314.621	243.275	high	high	high	high
ENSMUST00000032916	508.994	456.107	413.578	363.058	312.074	327.376	304.02	519.069	501.367	506.32	548.671	320.065	318.115	194.032	high	high	high	high
ENSMUST00000096053	211.685	195.065	208.975	121.321	224.03	205.503	249.56	198.154	198.729	172.943	213.008	213.132	252.046	366.015	high	high	high	high
ENSMUST00000029804	327.834	303.252	290.292	352.194	311.527	270.728	283.053	323.678	274.586	265.2	315.978	286.374	266.181	278.186	high	high	high	high
ENSMUST00000112751	100.293	115.564	97.9298	60.6606	278.351	260.364	342.277	90.7877	69.9306	93.5081	102.971	260.007	282.699	287.74	high	high	high	high
ENSMUST00000039450	264.408	261.862	280.674	315.073	280.356	261.615	286.456	262.495	228.361	247.687	266.007	288.571	289.369	252.094	high	high	high	high
ENSMUST00000021957	1401.32	1238.01	1064.99	895.423	252.466	251.25	278.968	1402.47	1191.59	1071.43	1446.63	285.348	266.023	278.553	high	high	high	high
ENSMUST00000034699	612.855	617.568	695.126	604.795	347.073	309.863	365.286	584.988	514.799	479.112	604.699	347.897	332.568	149.199	high	high	high	high
ENSMUST00000061755	133.988	129.497	201.106	201.9	312.621	293.066	320.766	128.682	135.12	137.604	121.142	293.259	317.639	217.918	high	high	high	high
ENSMUST00000034623	286.21	310.218	317.397	363.058	271.606	278.412	212.119	272.363	244.164	238.305	290.74	229.685	248.394	349.845	high	high	high	high
ENSMUST00000035007	219.216	171.296	135.528	135.807	292.387	273.409	283.325	183.154	195.964	230.174	191.303	292.673	301.28	233.72	high	high	high	high
ENSMUST00000021135	145.087	156.953	128.533	153.01	256.659	264.295	247.654	144.076	156.455	151.677	139.818	242.429	247.123	338.086	high	high	high	high
ENSMUST00000037983	357.961	358.575	382.101	441.826	330.302	315.939	300.207	382.098	313.305	344.948	387.654	316.11	318.433	192.929	high	high	high	high
ENSMUST00000090300	338.933	341.773	307.779	271.615	309.886	326.661	313.55	354.467	337.8	338.068	360.902	313.62	339.556	174.188	high	high	high	high
ENSMUST00000021239	751.599	763.457	907.599	969.664	368.765	327.554	352.08	787.879	672.835	626.098	787.422	362.984	342.891	120.902	high	high	high	high
ENSMUST00000035086	119.32	113.105	130.282	90.5382	304.235	294.853	297.348	122.761	120.502	122.905	127.199	281.686	304.774	239.6	high	high	high	high
ENSMUST00000027467	401.17	411.439	778.192	690.806	239.524	236.954	183.801	408.544	387.581	333.377	454.786	194.383	210.753	420.77	high	high	high	high
ENSMUST00000020217	184.332	165.149	223.839	174.739	267.596	278.591	272.569	183.154	221.644	241.12	203.922	270.554	286.987	267.896	high	high	high	high
ENSMUST00000066296	250.533	295.466	331.387	283.385	297.309	272.873	323.761	330.783	280.512	255.505	288.216	292.966	315.257	217.183	high	high	high	high
ENSMUST00000028251	169.268	164.33	235.206	219.102	302.959	303.609	254.598	160.26	138.676	152.928	167.075	275.241	287.622	261.281	high	high	high	high
ENSMUST00000035721	200.585	191.786	201.98	170.212	327.75	314.867	293.128	163.023	153.294	165.437	177.675	301.022	310.968	212.039	high	high	high	high
ENSMUST00000040270	397.206	436.847	369.86	331.37	312.256	288.598	336.695	386.834	397.853	420.943	427.025	310.983	298.739	213.876	high	high	high	high
ENSMUST00000047783	108.221	120.481	121.538	116.794	297.126	279.663	235.265	110.524	81.3881	95.0718	94.8944	266.159	286.193	270.469	high	high	high	high
ENSMUST00000062125	366.682	402.014	332.262	349.477	271.606	268.763	311.508	402.624	348.072	336.504	393.206	306.881	285.875	230.045	high	high	high	high
ENSMUST00000089473	91.5714	79.5012	118.04	77.8628	285.095	259.47	255.006	97.8928	121.687	86.6279	84.2945	232.908	289.369	300.235	high	high	high	high
ENSMUST00000018691	562.114	526.593	405.709	315.073	285.642	285.739	375.498	583.015	478.451	513.825	581.481	317.721	310.651	192.929	high	high	high	high
ENSMUST00000107818	108.617	97.9421	108.422	91.4436	260.851	270.907	219.063	104.208	94.8211	116.651	98.4277	228.074	258.717	334.411	high	high	high	high
ENSMUST00000021522	132.006	142.201	160.885	160.253	203.431	229.985	161.608	136.576	128.008	137.291	143.351	183.396	197.889	439.511	high	high	high	high
ENSMUST00000036904	155.394	169.247	160.885	194.657	266.32	237.49	265.353	149.997	124.058	133.226	140.323	228.074	251.094	341.026	high	high	high	high
ENSMUST00000100866	574.403	516.348	370.734	320.505	364.39	325.589	334.245	585.778	395.483	384.665	457.815	355.221	332.886	131.927	high	high	high	high
ENSMUST00000109381	114.167	98.3519	120.663	83.2951	250.461	248.57	217.021	97.4981	113.39	118.527	104.485	216.794	241.247	361.972	high	high	high	high
ENSMUST00000049206	539.122	529.461	493.146	498.865	302.413	248.034	357.934	544.726	384.42	402.491	497.186	318.6	310.968	189.254	high	high	high	high
ENSMUST00000081291	277.093	258.584	186.241	187.414	284.366	309.327	292.447	267.232	222.039	239.556	255.407	315.963	297.945	204.689	high	high	high	high
ENSMUST00000009003	228.73	228.258	225.588	281.574	274.158	274.838	278.56	250.258	210.582	238.305	239.255	278.317	285.399	254.667	high	high	high	high
ENSMUST00000021345	67.7866	51.6348	80.4423	60.6606	318.089	308.255	270.255	55.6568	42.6695	53.1651	47.4472	280.075	293.022	244.745	high	high	high	high
ENSMUST00000027929	164.511	172.116	125.91	133.997	251.19	252.858	249.696	198.154	154.874	164.812	166.57	250.925	263.481	302.807	high	high	high	high
ENSMUST00000066778	318.716	310.628	237.829	232.683	278.533	280.557	310.282	317.757	268.66	302.729	331.626	294.723	279.205	242.907	high	high	high	high
ENSMUST00000022057	293.346	290.958	240.453	262.561	312.803	261.257	272.705	307.099	255.227	223.606	224.617	272.751	282.222	260.914	high	high	high	high
ENSMUST00000065060	69.3723	54.9132	90.9348	66.0929	267.231	287.168	226.415	83.2878	77.4372	94.4463	82.2755	221.775	263.799	329.634	high	high	high	high
ENSMUST00000182884	98.7069	109.826	203.729	66.0929	275.07	262.687	269.302	96.7086	98.3769	93.8208	103.475	260.007	264.117	291.048	high	high	high	high
ENSMUST00000062519	121.302	89.3363	150.392	115.889	355.093	274.124	316.137	116.84	96.7965	98.5119	97.4182	274.802	319.545	220.123	high	high	high	high
ENSMUST00000024727	410.684	464.303	451.176	517.878	284.366	289.67	300.071	409.729	361.9	365.588	368.473	280.515	283.651	250.257	high	high	high	high
ENSMUST00000114991	367.078	307.76	198.483	176.549	296.397	258.219	261.677	331.967	256.412	232.676	277.112	274.362	269.675	270.101	high	high	high	high
ENSMUST00000181620	36.8664	42.2094	58.583	48.8906	194.864	170.478	182.984	62.3672	49.386	42.8448	62.5899	237.302	269.199	307.217	high	high	high	high
ENSMUST00000020999	801.151	755.671	627.8	724.306	357.645	314.509	366.512	832.089	622.658	608.584	725.841	398.58	326.692	88.1963	high	high	high	high
ENSMUST00000000199	146.276	117.203	111.045	118.605	225.123	236.061	217.021	146.444	118.921	159.183	164.551	225.73	238.07	349.11	high	high	high	high
ENSMUST00000065537	154.601	152.446	131.156	119.51	324.105	310.221	345	168.549	130.379	155.43	148.903	304.684	337.968	170.145	high	high	high	high
ENSMUST00000000175	330.608	358.985	380.352	462.65	286.189	279.663	233.631	336.309	291.18	292.721	316.988	255.905	266.499	289.21	high	high	high	high
ENSMUST00000043374	236.262	190.967	239.578	258.034	279.991	315.045	270.799	309.468	229.941	229.236	284.683	290.622	318.433	202.116	high	high	high	high
ENSMUST00000108840	223.973	222.111	274.553	229.062	234.602	236.239	182.303	226.18	198.729	199.838	240.769	192.478	209.959	408.275	high	high	high	high
ENSMUST00000023095	707.597	695.02	772.071	678.131	399.571	338.098	402.727	646.961	669.279	671.444	777.326	361.227	349.085	99.9558	high	high	high	high
ENSMUST00000008907	116.545	95.4833	118.915	94.1597	267.414	258.934	273.659	115.656	116.551	117.589	107.009	253.562	284.922	271.204	high	high	high	high
ENSMUST00000100089	122.492	126.218	101.427	226.345	286.554	297.89	218.655	92.7613	164.357	183.576	120.637	242.282	255.858	310.892	high	high	high	high
ENSMUST00000109166	379.367	376.606	438.935	454.502	278.898	271.8	261.95	414.465	329.503	324.62	388.663	270.407	290.163	248.419	high	high	high	high
ENSMUST00000047045	474.903	562.655	470.413	155.726	308.428	330.95	306.606	631.566	406.545	447.525	479.52	373.238	289.051	145.891	high	high	high	high
ENSMUST00000160721	236.262	258.584	209.849	159.347	347.437	309.863	323.897	282.231	227.966	270.204	264.998	330.905	308.11	169.043	high	high	high	high
ENSMUST00000141846	201.774	201.621	201.106	237.21	287.647	303.073	248.199	225.785	167.912	171.379	176.665	280.661	285.716	241.437	high	high	high	high
ENSMUST00000004072	409.891	430.7	716.986	725.211	245.722	247.319	189.246	403.018	412.472	359.646	461.853	204.636	218.218	384.756	high	high	high	high
ENSMUST00000040284	432.09	445.862	599.82	685.374	284.366	291.279	223.556	440.123	400.619	362.148	458.824	241.697	259.193	306.115	high	high	high	high
ENSMUST00000022345	342.501	337.265	346.252	452.691	330.485	330.056	268.621	311.046	276.562	280.212	310.931	296.042	295.881	214.611	high	high	high	high
ENSMUST00000046502	317.923	274.156	188.865	181.982	295.303	281.629	293.672	294.863	289.599	279.899	260.96	317.282	302.233	186.682	high	high	high	high
ENSMUST00000060972	701.651	753.622	731.85	832.951	296.033	264.295	316.137	721.959	574.458	562.299	653.156	312.155	296.675	196.972	high	high	high	high
ENSMUST00000046587	445.172	402.833	302.533	311.451	305.694	294.674	300.752	466.964	354.394	342.759	428.539	315.67	288.098	201.381	high	high	high	high
ENSMUST00000099090	68.5795	77.4522	109.297	58.8498	268.143	272.873	333.836	94.735	76.252	73.8057	85.8088	257.956	329.55	217.551	high	high	high	high
ENSMUST00000059018	335.762	351.608	249.196	215.481	240.982	246.425	261.95	313.415	272.611	279.273	317.997	239.646	233.465	331.838	high	high	high	high
ENSMUST00000069520	397.999	394.637	620.805	552.283	267.778	263.223	204.087	421.571	370.197	328.686	438.129	218.406	237.276	349.11	high	high	high	high
ENSMUST00000103075	277.093	305.301	285.046	236.305	298.038	280.021	273.114	286.968	225.99	218.29	257.931	274.216	277.934	252.462	high	high	high	high
ENSMUST00000005749	195.035	185.639	221.216	192.846	314.808	294.674	277.879	204.075	166.332	178.572	179.694	281.393	295.881	227.105	high	high	high	high
ENSMUST00000027123	307.617	316.365	340.131	333.181	288.194	294.138	234.584	282.231	304.218	283.964	319.007	243.015	266.023	294.355	high	high	high	high
ENSMUST00000031032	480.849	481.105	399.588	488.001	328.479	315.403	339.01	491.043	419.188	424.383	508.291	342.77	318.751	141.849	high	high	high	high
ENSMUST00000045887	233.091	259.403	318.272	337.707	238.977	250.714	178.627	257.758	224.41	218.915	266.007	205.955	217.741	379.611	high	high	high	high
ENSMUST00000054230	77.697	74.5836	95.3066	61.566	267.596	266.082	267.26	92.3666	84.1537	75.9949	75.7136	271.14	282.857	249.154	high	high	high	high
ENSMUST00000060837	445.172	428.241	370.734	333.181	332.307	311.114	305.381	429.07	347.677	333.064	413.901	327.096	285.557	190.357	high	high	high	high
ENSMUST00000098070	102.275	77.0424	105.799	60.6606	309.886	294.316	220.016	100.656	86.9193	71.6166	61.5804	259.274	290.481	253.197	high	high	high	high
ENSMUST00000109896	121.699	123.35	109.297	71.5252	291.475	294.495	228.049	148.023	132.75	89.4425	113.57	311.129	286.51	204.689	high	high	high	high
ENSMUST00000022150	399.981	431.109	573.589	626.524	257.752	273.945	202.181	439.728	361.9	326.496	427.025	233.054	241.247	327.796	high	high	high	high
ENSMUST00000080065	286.21	339.724	266.684	258.034	275.981	271.264	262.903	301.573	239.028	321.493	328.092	262.497	259.829	279.656	high	high	high	high
ENSMUST00000060100	289.382	329.069	273.679	277.952	345.979	314.867	323.489	284.205	228.361	236.116	254.398	327.975	280.634	193.297	high	high	high	high
ENSMUST00000071874	94.7427	118.432	124.161	43.4583	192.312	202.823	201.228	106.182	127.218	151.99	139.818	176.219	211.865	413.42	high	high	high	high
ENSMUST00000033975	252.515	254.076	174	190.13	254.836	246.783	240.166	242.364	220.459	192.645	228.655	258.542	241.723	300.235	high	high	high	high
ENSMUST00000117245	260.047	246.29	199.357	223.629	293.845	284.131	262.903	259.337	217.298	197.336	205.941	260.153	266.023	274.143	high	high	high	high
ENSMUST00000043624	139.537	131.546	130.282	112.267	305.694	266.261	310.827	149.997	131.959	129.16	156.98	266.452	301.439	231.883	high	high	high	high
ENSMUST00000107537	127.249	148.348	141.648	176.549	191.765	214.081	199.321	125.919	124.848	107.581	153.446	191.453	206.306	401.293	high	high	high	high
ENSMUST00000188090	124.474	119.662	158.261	97.7812	280.538	243.209	273.659	106.972	136.305	127.284	127.704	232.761	304.139	261.281	high	high	high	high
ENSMUST00000032071	450.722	419.225	403.086	306.924	294.939	266.439	291.222	449.596	435.782	410.31	466.901	288.132	302.075	206.894	high	high	high	high
ENSMUST00000087204	269.957	224.57	250.071	124.943	283.455	255.003	267.532	209.601	202.68	162.31	167.579	269.968	266.817	260.179	high	high	high	high
ENSMUST00000022589	353.997	432.749	325.267	381.166	298.22	295.746	327.165	424.334	302.637	341.821	386.139	359.029	330.503	106.938	high	high	high	high
ENSMUST00000117194	223.577	222.521	181.87	125.848	272.7	291.279	251.466	230.127	192.803	209.533	266.007	270.993	282.063	243.275	high	high	high	high
ENSMUST00000000544	379.367	335.626	264.935	184.698	320.094	270.013	346.634	386.44	303.032	313.362	358.883	316.256	314.621	165.368	high	high	high	high
ENSMUST00000057438	101.085	102.04	102.302	116.794	257.935	285.739	294.489	111.708	101.538	113.836	100.951	261.765	288.257	246.215	high	high	high	high
ENSMUST00000020886	152.223	176.214	177.498	167.496	275.799	276.983	305.381	166.576	169.098	213.286	184.236	270.407	298.104	227.105	high	high	high	high
ENSMUST00000001562	373.421	371.688	299.91	276.141	310.798	284.488	299.118	349.73	294.736	316.489	408.349	297.946	300.804	196.237	high	high	high	high
ENSMUST00000128764	230.316	220.062	246.573	183.793	301.319	319.513	271.072	219.864	199.914	190.144	216.036	288.571	290.481	215.713	high	high	high	high
ENSMUST00000020692	66.9938	46.3074	60.3317	64.2821	304.418	241.243	236.354	97.8928	177.394	185.452	119.123	198.777	272.216	322.651	high	high	high	high
ENSMUST00000024739	388.881	398.735	754.584	778.628	223.665	222.301	168.143	391.966	389.557	314.3	468.92	180.32	195.507	417.462	high	high	high	high
ENSMUST00000022268	451.118	450.37	567.468	717.062	331.031	320.406	271.208	500.516	446.844	412.499	484.062	272.019	289.051	230.78	high	high	high	high
ENSMUST00000059899	486.795	457.337	599.82	536.891	321.917	268.048	319.132	505.648	367.432	420.943	431.568	322.555	300.963	168.308	high	high	high	high
ENSMUST00000084882	254.497	271.287	229.086	269.804	272.335	264.474	214.298	239.206	235.077	237.679	240.265	221.628	246.011	324.121	high	high	high	high
ENSMUST00000029570	155.79	151.626	221.216	200.089	298.767	289.67	265.217	153.944	138.281	147.299	165.56	269.235	286.193	235.19	high	high	high	high
ENSMUST00000032335	87.6073	90.9755	101.427	74.2413	298.949	263.759	288.907	89.2087	84.1537	101.014	91.8658	270.114	274.599	245.112	high	high	high	high
ENSMUST00000018625	153.808	169.247	166.131	137.618	297.491	287.883	350.174	181.575	157.64	182.951	147.389	280.368	322.403	187.05	high	high	high	high
ENSMUST00000065562	107.824	69.666	112.794	124.943	298.767	265.725	350.038	119.208	108.254	106.33	92.3706	262.644	293.816	232.985	high	high	high	high
ENSMUST00000120381	151.826	161.871	162.633	123.132	317.178	298.427	313.278	133.418	122.082	136.978	165.56	333.834	337.968	117.595	high	high	high	high
ENSMUST00000029106	129.231	94.6637	98.8041	70.6198	252.831	253.216	203.27	117.629	88.4997	86.0024	100.447	241.111	233.782	314.199	high	high	high	high
ENSMUST00000015749	184.332	155.724	122.412	95.0651	227.675	248.57	216.476	190.654	171.073	183.889	182.722	234.665	225.206	328.531	high	high	high	high
ENSMUST00000022176	57.8763	54.5034	96.181	58.8498	240.071	255.36	189.655	58.8146	45.4351	53.7906	34.8283	192.771	212.659	382.551	high	high	high	high
ENSMUST00000078308	274.714	260.633	324.392	284.29	337.594	300.035	332.475	296.047	241.004	246.436	241.274	333.834	338.285	115.023	high	high	high	high
ENSMUST00000102598	333.78	341.773	356.744	442.732	322.829	315.76	295.034	341.441	361.11	321.18	354.34	314.352	301.122	171.615	high	high	high	high
ENSMUST00000049168	261.236	238.503	228.211	255.318	264.497	260.006	240.03	286.179	227.966	230.174	266.007	266.745	252.841	267.161	high	high	high	high
ENSMUST00000001242	245.38	243.831	259.689	280.668	268.325	288.598	227.776	248.285	205.841	212.973	227.646	254.734	245.694	285.535	high	high	high	high
ENSMUST00000022062	328.626	346.691	355.87	382.977	308.428	291.1	273.386	344.204	308.564	288.655	344.749	275.681	279.84	230.413	high	high	high	high
ENSMUST00000043765	608.494	602.815	674.142	723.4	305.694	279.663	312.461	606.304	578.409	539.782	595.109	306.588	278.41	199.912	high	high	high	high
ENSMUST00000038361	121.302	107.368	71.6986	78.7682	308.61	275.553	291.358	98.2875	96.7965	103.203	97.9229	287.839	318.751	178.23	high	high	high	high
ENSMUST00000019962	160.944	147.118	230.834	211.859	341.604	301.822	300.752	127.497	223.62	211.097	178.684	281.393	310.333	192.562	high	high	high	high
ENSMUST00000114449	417.027	429.88	422.322	523.311	311.345	288.419	328.526	418.807	384.025	405.931	454.786	313.18	306.363	164.266	high	high	high	high
ENSMUST00000085913	35.6772	22.539	13.99	23.5399	208.353	260.185	124.304	23.289	47.8056	45.6595	32.3045	168.748	172.637	442.084	high	high	high	high
ENSMUST00000052457	328.626	328.25	226.463	185.603	310.069	301.107	289.86	343.414	278.142	302.729	372.006	299.264	307.951	176.025	high	high	high	high
ENSMUST00000049453	376.196	381.114	339.257	363.964	265.044	244.996	300.888	443.281	317.256	374.971	409.358	281.247	265.228	236.66	high	high	high	high
ENSMUST00000025505	217.631	241.372	270.181	253.507	249.367	249.106	280.466	238.022	250.881	238.93	239.76	242.429	258.082	282.596	high	high	high	high
ENSMUST00000072726	415.441	437.666	448.553	348.572	297.491	250.535	296.804	478.017	346.097	344.635	331.626	290.915	294.292	197.707	high	high	high	high
ENSMUST00000007012	270.75	280.303	281.548	320.505	279.809	294.495	252.419	270.784	249.3	246.749	274.083	267.624	276.346	238.865	high	high	high	high
ENSMUST00000010536	315.148	293.417	299.036	265.277	282.179	269.656	296.259	289.336	214.138	229.861	238.75	300.143	278.093	203.954	high	high	high	high
ENSMUST00000047786	265.597	279.483	185.367	159.347	242.258	249.463	243.434	301.968	208.211	251.753	276.607	285.495	283.651	212.039	high	high	high	high
ENSMUST00000026624	147.862	149.987	216.844	178.36	218.561	220.514	180.397	151.181	133.145	125.094	140.827	191.306	203.607	386.226	high	high	high	high
ENSMUST00000106113	234.28	223.341	192.362	157.536	240.435	247.497	301.977	271.968	230.336	286.779	278.626	265.72	274.599	240.335	high	high	high	high
ENSMUST00000072299	371.043	374.967	437.186	433.678	365.301	355.253	343.639	348.94	283.673	281.15	305.378	322.116	354.644	103.263	high	high	high	high
ENSMUST00000022614	147.069	154.495	114.543	148.483	271.606	280.021	259.091	138.55	124.848	117.276	143.351	260.3	281.587	237.762	high	high	high	high
ENSMUST00000053361	528.419	560.606	506.262	444.543	375.874	300.928	340.644	496.964	415.632	407.495	497.186	358.15	321.768	99.5883	high	high	high	high
ENSMUST00000007814	683.416	605.684	465.166	439.11	355.093	322.551	382.169	567.226	542.851	520.706	579.966	329.586	332.727	116.125	high	high	high	high
ENSMUST00000042661	657.253	540.526	367.237	327.748	296.579	290.564	343.911	639.066	568.927	601.704	648.108	275.827	291.116	210.569	high	high	high	high
ENSMUST00000155203	48.7588	49.176	66.4523	40.7422	261.763	253.394	239.485	43.4202	41.4842	38.7793	50.9805	222.654	271.74	281.493	high	high	high	high
ENSMUST00000088174	654.478	536.838	445.056	449.975	321.188	265.725	300.48	645.777	506.108	491.934	574.414	329.147	287.781	158.753	high	high	high	high
ENSMUST00000043775	534.761	486.842	368.985	402.895	267.414	244.102	289.452	561.699	459.487	469.73	458.32	293.551	264.911	217.183	high	high	high	high
ENSMUST00000165418	51.9301	52.8642	76.0704	84.2005	224.759	204.788	231.18	78.5511	54.5221	58.7944	58.0471	209.324	243.47	322.651	high	high	high	high
ENSMUST00000028826	326.644	365.951	299.91	258.939	313.897	318.619	328.39	279.073	227.176	200.464	242.788	298.239	276.663	200.279	high	high	high	high
ENSMUST00000051484	176.404	172.935	160.01	203.711	265.955	278.055	223.692	169.339	134.33	138.542	136.789	238.62	248.552	287.74	high	high	high	high
ENSMUST00000044158	415.441	431.519	477.408	479.852	299.678	290.742	271.344	382.492	392.322	398.426	393.206	279.05	266.34	228.943	high	high	high	high
ENSMUST00000114313	46.3803	63.519	67.3267	43.4583	230.227	230.521	278.56	42.6307	62.4239	80.3732	71.1708	236.716	264.752	272.673	high	high	high	high
ENSMUST00000110325	132.402	117.613	169.628	131.28	306.97	255.36	278.151	130.655	110.625	121.029	115.085	277.731	284.128	212.039	high	high	high	high
ENSMUST00000061457	457.461	445.452	367.237	352.194	309.339	276.268	306.743	479.201	376.914	370.279	413.901	290.768	278.887	203.954	high	high	high	high
ENSMUST00000046963	143.898	129.497	148.643	124.943	262.127	253.394	247.382	155.918	122.872	142.608	155.465	237.888	253.476	282.228	high	high	high	high
ENSMUST00000078124	44.7947	53.274	66.4523	69.7144	315.719	268.941	304.564	56.841	82.5734	75.3694	108.018	192.478	309.698	270.101	high	high	high	high
ENSMUST00000026270	378.971	329.069	412.704	480.758	324.287	271.443	335.742	400.255	318.441	301.79	330.616	331.051	297.628	143.319	high	high	high	high
ENSMUST00000025830	842.378	670.842	450.302	367.585	284.913	255.181	359.16	651.303	515.59	547.601	665.27	275.388	258.717	237.762	high	high	high	high
ENSMUST00000064091	38.0557	45.4878	93.5579	56.1337	312.803	244.638	289.452	56.4462	48.9909	40.9684	35.333	245.066	306.998	219.756	high	high	high	high
ENSMUST00000057037	258.065	318.824	393.468	279.763	283.455	272.158	321.991	331.572	305.403	291.157	330.111	268.21	308.904	194.399	high	high	high	high
ENSMUST00000023779	64.2189	70.4856	58.583	28.0668	94.0596	286.454	307.832	168.944	82.5734	409.372	489.615	221.335	315.257	234.823	high	high	high	high
ENSMUST00000041565	854.667	898.691	743.217	584.877	295.303	279.484	342.958	922.482	706.417	643.611	790.45	301.169	283.016	186.682	high	high	high	high
ENSMUST00000005067	509.787	527.002	535.991	564.053	284.549	263.223	262.222	485.122	461.463	431.263	455.291	272.751	251.094	246.95	high	high	high	high
ENSMUST00000112095	95.1391	101.63	173.126	142.145	302.595	284.309	254.734	108.945	97.1916	90.6935	71.1708	263.23	283.651	223.798	high	high	high	high
ENSMUST00000053917	105.842	105.319	83.9398	95.9705	227.311	225.875	230.772	89.2087	114.18	128.222	129.723	209.763	241.564	319.344	high	high	high	high
ENSMUST00000006181	438.036	452.419	485.277	468.988	325.927	318.977	261.541	403.808	349.653	338.693	440.148	283.151	282.063	204.689	high	high	high	high
ENSMUST00000006451	461.821	451.19	494.895	644.632	333.037	311.471	285.367	453.544	387.976	387.48	416.425	307.174	307.633	153.976	high	high	high	high
ENSMUST00000040766	520.49	534.789	641.79	674.51	342.333	316.832	320.494	495.385	447.239	464.1	557.757	322.262	315.098	131.192	high	high	high	high
ENSMUST00000086216	474.11	499.136	459.92	529.648	307.699	283.773	285.231	450.78	499.786	473.17	523.433	297.214	273.011	198.074	high	high	high	high
ENSMUST00000020153	197.414	204.49	160.01	172.928	223.483	219.084	228.866	179.602	173.839	198.275	209.979	222.507	231.082	313.832	high	high	high	high
ENSMUST00000022060	272.336	286.86	325.267	370.301	262.127	279.484	219.88	256.969	221.644	234.239	279.131	242.575	251.888	271.571	high	high	high	high
ENSMUST00000056028	440.415	370.459	285.046	383.882	269.054	253.931	263.72	424.728	481.612	533.528	456.301	269.968	265.07	230.413	high	high	high	high
ENSMUST00000116560	512.959	521.675	709.116	858.302	310.798	306.825	240.711	505.253	519.541	474.421	575.423	258.249	278.093	228.208	high	high	high	high
ENSMUST00000003123	268.372	280.713	277.176	321.411	257.57	265.546	226.823	300.389	256.017	279.899	252.379	283.298	259.829	219.756	high	high	high	high
ENSMUST00000047144	175.611	188.918	161.759	150.293	270.33	262.508	231.861	198.549	184.111	197.649	208.465	226.462	242.2	293.988	high	high	high	high
ENSMUST00000110617	290.174	290.548	258.814	209.143	225.123	213.366	210.077	311.046	282.488	279.899	271.559	246.091	239.817	276.716	high	high	high	high
ENSMUST00000100857	163.719	184.41	155.638	157.536	275.07	298.784	278.696	166.576	144.207	164.812	182.217	250.046	274.44	238.13	high	high	high	high
ENSMUST00000051737	340.122	338.085	351.498	287.911	261.763	254.467	278.424	378.15	355.579	346.199	364.435	286.374	280.634	195.502	high	high	high	high
ENSMUST00000042942	218.424	213.096	189.739	183.793	276.346	276.447	279.921	224.601	206.236	197.336	182.217	271.872	284.446	206.159	high	high	high	high
ENSMUST00000129635	101.878	92.2049	93.5579	77.8628	285.095	274.481	229.138	103.814	96.4014	88.817	99.4372	250.632	266.34	245.48	high	high	high	high
ENSMUST00000025930	303.256	301.203	297.287	262.561	320.094	279.306	290.949	294.468	274.586	254.567	261.969	291.647	294.134	176.393	high	high	high	high
ENSMUST00000100864	185.521	170.886	229.086	223.629	273.976	290.564	231.452	200.522	182.531	167.314	166.57	255.905	270.469	235.558	high	high	high	high
ENSMUST00000030464	178.782	176.624	175.749	196.468	274.341	240.349	277.062	185.523	196.359	174.194	159.503	261.618	270.152	230.045	high	high	high	high
ENSMUST00000036489	140.33	138.512	175.749	156.631	278.715	239.277	277.471	159.865	126.428	133.851	137.294	267.624	275.869	217.918	high	high	high	high
ENSMUST00000068795	338.14	365.541	437.186	416.476	290.199	279.127	226.415	326.441	314.095	293.034	357.873	244.48	263.64	253.197	high	high	high	high
ENSMUST00000162409	113.771	97.9421	164.382	132.186	326.657	272.337	348.949	108.156	152.109	144.797	119.123	256.638	298.898	205.056	high	high	high	high
ENSMUST00000047173	103.86	107.368	111.045	100.497	265.409	260.185	248.607	86.4456	95.2162	94.4463	84.7992	212.546	245.217	302.807	high	high	high	high
ENSMUST00000028239	298.103	313.087	344.503	342.234	299.678	287.705	255.278	265.653	291.18	311.798	264.493	266.306	270.469	223.431	high	high	high	high
ENSMUST00000027780	223.973	208.588	208.975	212.765	293.116	274.302	311.372	202.891	196.754	199.526	202.912	286.96	294.928	177.862	high	high	high	high
ENSMUST00000106992	40.8305	35.6526	35.8493	48.8906	156.584	166.726	129.613	30.7889	70.7207	95.3845	73.6946	150.438	152.625	456.048	high	high	high	high
ENSMUST00000027802	255.29	265.14	233.458	309.641	261.034	258.041	236.626	249.074	201.1	219.541	214.017	234.079	237.594	286.638	high	high	high	high
ENSMUST00000030164	435.262	467.172	614.684	628.335	248.091	233.023	193.331	438.544	406.15	378.411	463.367	199.217	212.5	346.538	high	high	high	high
ENSMUST00000030400	214.459	217.194	267.558	271.615	244.81	253.216	196.735	227.364	176.999	189.205	234.207	222.214	227.271	308.319	high	high	high	high
ENSMUST00000075845	155.79	136.873	171.377	138.523	297.855	292.172	264.673	152.365	126.033	154.804	146.38	281.979	286.669	188.887	high	high	high	high
ENSMUST00000023759	267.579	256.535	155.638	153.01	279.262	275.553	279.377	248.285	205.446	245.811	273.074	263.23	267.77	226.003	high	high	high	high
ENSMUST00000044106	360.339	370.049	420.573	368.49	310.251	306.468	276.79	343.414	337.405	336.504	349.797	283.884	299.216	173.82	high	high	high	high
ENSMUST00000034796	170.061	146.299	222.091	202.806	279.445	272.158	273.795	153.944	133.935	134.164	149.408	270.554	280.316	205.056	high	high	high	high
ENSMUST00000020397	127.645	119.252	136.402	133.091	237.336	260.721	212.256	158.681	123.267	115.087	136.789	231.003	240.77	283.698	high	high	high	high
ENSMUST00000051145	212.081	216.374	235.206	245.359	317.36	301.286	288.635	210.391	180.16	187.954	202.912	305.124	309.857	140.379	high	high	high	high
ENSMUST00000159899	154.205	129.497	114.543	100.497	277.257	269.656	249.016	120.392	109.439	119.465	113.066	281.833	274.281	198.442	high	high	high	high
ENSMUST00000011058	134.78	151.216	139.9	145.766	278.533	276.447	225.598	133.024	120.897	126.033	114.075	246.384	261.734	246.215	high	high	high	high
ENSMUST00000035725	196.621	215.145	244.824	271.615	229.498	249.463	185.979	197.364	188.062	202.966	211.998	211.961	222.665	319.344	high	high	high	high
ENSMUST00000113360	137.555	140.971	180.995	163.874	275.799	269.835	226.687	145.655	135.12	147.299	143.856	233.054	254.429	266.426	high	high	high	high
ENSMUST00000090247	439.622	427.831	354.121	255.318	235.878	207.826	254.189	467.754	397.063	376.221	363.425	238.913	251.729	263.119	high	high	high	high
ENSMUST00000022986	155.79	126.628	95.3066	143.956	371.864	266.439	267.532	96.7086	165.937	161.997	128.208	246.677	294.61	211.304	high	high	high	high
ENSMUST00000035812	149.051	140.561	124.161	114.984	223.483	219.978	213.889	158.681	111.415	128.222	130.732	221.775	226.159	303.91	high	high	high	high
ENSMUST00000097715	208.91	212.686	220.342	252.602	252.466	267.69	198.913	182.365	187.667	184.514	186.255	224.851	228.224	298.765	high	high	high	high
ENSMUST00000069597	154.205	127.038	184.493	134.902	268.507	243.745	270.391	137.76	155.665	136.978	146.38	246.823	262.37	242.54	high	high	high	high
ENSMUST00000026265	555.771	606.504	596.322	736.076	324.469	288.062	303.203	604.33	470.55	447.213	539.081	342.916	308.904	99.5883	high	high	high	high
ENSMUST00000048162	258.065	246.29	225.588	243.548	240.8	228.555	220.697	236.443	215.323	211.097	232.693	229.831	215.359	305.38	high	high	high	high
ENSMUST00000071926	281.453	289.728	334.885	395.652	316.266	316.475	253.917	268.416	232.707	233.614	256.922	269.968	285.399	194.767	high	high	high	high
ENSMUST00000000153	297.706	294.646	238.704	240.832	238.248	228.913	225.326	329.993	267.079	303.979	337.178	224.119	223.777	302.072	high	high	high	high
ENSMUST00000034883	503.841	474.958	435.438	466.272	279.809	259.47	281.555	459.07	421.559	402.804	511.824	300.143	279.205	169.778	high	high	high	high
ENSMUST00000038942	134.384	113.924	69.0755	62.4714	180.463	200.678	162.697	157.102	148.158	178.26	121.647	183.689	199.318	365.647	high	high	high	high
ENSMUST00000069285	208.513	182.361	220.342	194.657	250.826	250.535	204.495	215.917	193.198	174.819	225.122	205.808	239.182	303.542	high	high	high	high
ENSMUST00000054384	104.257	77.862	82.1911	64.2821	274.523	239.456	215.387	99.077	99.9572	100.388	71.6755	290.329	245.376	212.773	high	high	high	high
ENSMUST00000039867	55.4978	48.3564	84.8142	73.3359	243.534	227.483	243.842	61.9724	64.0042	61.609	59.5614	197.459	249.982	300.97	high	high	high	high
ENSMUST00000043843	293.346	273.746	194.985	153.915	268.325	263.402	273.386	256.179	269.845	307.107	288.721	270.407	266.975	210.201	high	high	high	high
ENSMUST00000003444	359.547	365.951	302.533	423.719	313.35	296.818	287.137	390.387	314.49	293.034	341.721	307.614	293.498	145.891	high	high	high	high
ENSMUST00000101509	124.474	85.2383	100.553	68.809	265.591	229.27	286.456	101.445	98.3769	102.89	88.8373	202.879	263.958	280.023	high	high	high	high
ENSMUST00000189404	46.3803	50.8152	51.588	32.5937	188.666	211.043	143.228	45.3938	39.9039	39.7175	39.8758	173.143	198.524	374.834	high	high	high	high
ENSMUST00000048519	111.788	95.8931	104.05	117.7	258.664	233.559	247.246	126.313	87.3144	106.643	102.466	278.317	284.763	183.375	high	high	high	high
ENSMUST00000113229	75.3185	58.6014	90.0604	66.9983	324.469	284.309	318.451	67.1039	70.7207	79.7477	56.0281	263.083	314.78	167.94	high	high	high	high
ENSMUST00000141158	283.435	254.076	236.955	143.956	336.5	312.008	306.743	303.547	255.622	281.15	311.94	340.572	334.156	69.822	high	high	high	high
ENSMUST00000076521	186.711	205.31	169.628	193.752	295.121	277.161	288.226	181.181	186.877	201.402	163.037	294.87	280.793	168.675	high	high	high	high
ENSMUST00000030814	295.724	334.806	307.779	313.262	288.923	304.502	248.199	300.389	268.265	269.266	294.778	275.241	269.675	199.177	high	high	high	high
ENSMUST00000044766	146.276	139.742	154.764	94.1597	258.664	213.723	224.1	166.97	130.774	150.426	144.361	208.445	228.224	306.482	high	high	high	high
ENSMUST00000098312	67.7866	79.0914	57.7086	66.9983	207.624	234.989	226.551	84.472	71.906	93.8208	81.7707	205.808	228.859	308.319	high	high	high	high
ENSMUST00000064571	189.485	179.492	129.407	105.024	275.617	262.866	264.809	185.128	154.084	187.642	179.694	269.675	273.011	200.279	high	high	high	high
ENSMUST00000080036	184.332	203.261	169.628	105.024	214.551	192.816	225.598	209.601	186.877	192.02	172.122	223.679	228.541	290.313	high	high	high	high
ENSMUST00000028825	193.45	185.229	226.463	207.332	281.997	283.595	227.913	177.628	159.22	150.113	178.179	239.499	257.605	245.112	high	high	high	high
ENSMUST00000059539	90.3822	90.1559	117.166	69.7144	204.343	229.985	245.612	140.918	103.118	137.291	122.151	207.859	263.799	270.101	high	high	high	high
ENSMUST00000033597	163.322	175.804	185.367	195.562	324.651	323.802	267.396	155.128	159.22	161.997	137.294	273.923	308.11	159.488	high	high	high	high
ENSMUST00000086635	575.195	529.871	582.332	550.472	298.949	285.382	306.47	589.725	483.588	455.344	551.195	312.448	287.304	141.114	high	high	high	high
ENSMUST00000045296	79.679	85.2383	102.302	88.7274	218.196	256.968	200.819	99.4717	86.9193	103.828	108.523	210.789	227.906	302.072	high	high	high	high
ENSMUST00000098414	196.224	159.822	214.221	259.845	262.674	249.106	262.767	204.864	155.665	179.198	184.741	228.806	248.076	263.119	high	high	high	high
ENSMUST00000109910	253.704	237.684	199.357	200.089	273.794	268.941	270.119	251.442	232.312	251.44	277.617	293.551	282.857	163.163	high	high	high	high
ENSMUST00000082388	399.584	424.962	604.192	591.214	121.403	139.742	100.886	405.387	413.657	389.982	458.824	118.358	140.396	480.67	high	high	high	high
ENSMUST00000020947	181.954	193.016	208.975	299.681	270.877	267.333	238.805	192.233	159.22	164.812	172.627	254.88	255.699	228.208	high	high	high	high
ENSMUST00000161600	30.5238	31.9644	93.5579	39.8368	282.726	262.329	309.602	38.2887	32.7923	36.2774	29.7807	218.699	287.463	232.25	high	high	high	high
ENSMUST00000013338	265.993	237.274	250.945	227.251	246.998	230.7	257.321	323.283	254.041	282.713	324.054	283.591	281.269	173.453	high	high	high	high
ENSMUST00000014913	306.824	330.299	406.583	506.109	246.998	253.573	201.091	301.968	299.477	267.389	307.397	213.865	223.618	300.602	high	high	high	high
ENSMUST00000021514	546.257	541.345	604.192	639.2	290.017	260.364	323.353	541.963	441.313	467.228	544.128	329.44	293.181	115.39	high	high	high	high
ENSMUST00000034300	309.202	325.381	421.448	478.042	293.845	317.905	237.988	333.941	297.896	301.165	317.997	258.249	276.187	203.219	high	high	high	high
ENSMUST00000034226	219.613	207.359	175.749	220.008	249.003	260.9	236.762	196.18	180.16	220.479	210.484	250.046	246.011	241.437	high	high	high	high
ENSMUST00000046835	143.502	111.056	236.081	150.293	225.488	175.482	216.748	138.945	129.194	115.4	104.99	173.875	216.63	346.538	high	high	high	high
ENSMUST00000028829	34.8843	45.078	55.9599	40.7422	218.014	247.497	354.122	38.2887	52.9418	71.6166	71.1708	207.42	287.463	241.805	high	high	high	high
ENSMUST00000024811	227.938	212.276	201.98	207.332	278.715	229.806	229.002	172.891	181.345	180.136	202.912	223.24	238.706	274.143	high	high	high	high
ENSMUST00000123491	208.513	190.147	181.87	132.186	312.074	283.952	310.691	234.074	184.901	173.256	218.56	296.335	308.745	130.457	high	high	high	high
ENSMUST00000033866	127.249	139.742	131.156	96.8759	256.841	282.522	292.719	115.656	131.169	131.662	137.294	244.773	270.946	219.756	high	high	high	high
ENSMUST00000025675	260.443	222.111	174	181.076	262.492	255.896	244.387	284.205	227.571	244.872	221.588	260.446	243.47	231.515	high	high	high	high
ENSMUST00000094151	179.575	171.296	115.417	133.091	270.513	270.371	264.809	167.76	199.124	214.537	177.17	238.913	267.134	228.208	high	high	high	high
ENSMUST00000118762	81.2647	76.2228	53.3367	61.566	226.946	228.019	195.237	78.5511	67.9551	91.3189	90.3516	184.568	227.588	320.814	high	high	high	high
ENSMUST00000117892	411.477	425.782	395.217	430.962	303.871	293.244	283.734	399.86	339.38	356.519	435.606	299.411	293.022	140.012	high	high	high	high
ENSMUST00000043493	274.714	267.189	219.468	204.616	242.44	234.631	235.945	337.099	281.303	266.764	273.579	251.657	248.235	232.25	high	high	high	high
ENSMUST00000025851	399.188	414.717	368.985	443.637	283.09	273.945	293.672	380.913	395.088	374.971	357.873	283.298	255.858	192.929	high	high	high	high
ENSMUST00000020286	312.77	328.25	439.81	461.745	266.867	261.079	197.143	337.888	295.131	280.212	344.749	216.941	226.953	287.74	high	high	high	high
ENSMUST00000051772	442.397	407.341	382.101	459.029	285.825	280.914	276.654	478.806	384.42	411.248	501.729	322.116	301.439	108.04	high	high	high	high
ENSMUST00000021828	293.346	285.221	312.151	287.006	260.669	282.522	229.819	277.889	213.347	242.37	300.835	240.085	258.399	232.985	high	high	high	high
ENSMUST00000005431	308.013	324.971	251.819	273.425	254.836	226.054	257.593	328.415	266.289	244.247	252.379	268.649	237.753	224.9	high	high	high	high
ENSMUST00000071370	255.686	214.735	210.724	170.212	384.441	278.412	315.32	283.81	173.444	156.055	149.913	325.338	321.292	84.1539	high	high	high	high
ENSMUST00000040718	58.6691	55.323	69.9498	42.553	263.039	247.497	208.716	49.7359	58.0779	67.2383	55.5233	200.974	240.929	288.843	high	high	high	high
ENSMUST00000025831	667.163	676.17	545.609	393.841	295.121	250.714	328.799	834.852	567.346	533.84	546.652	344.82	290.481	94.811	high	high	high	high
ENSMUST00000078090	80.4719	69.2562	118.04	99.592	250.826	256.79	247.518	72.2354	58.8681	70.0529	60.5709	245.798	260.781	223.431	high	high	high	high
ENSMUST00000058119	129.627	131.546	169.628	153.01	251.372	249.106	195.101	130.261	93.6358	108.519	108.018	221.775	221.077	287.005	high	high	high	high
ENSMUST00000021959	276.696	297.105	313.9	328.654	283.273	286.811	253.917	300.783	258.783	232.676	267.521	272.458	268.881	187.417	high	high	high	high
ENSMUST00000037850	383.728	400.374	474.784	551.378	295.668	277.161	287.001	384.071	354.789	329.624	359.387	287.985	275.869	163.898	high	high	high	high
ENSMUST00000049811	244.587	274.566	244.824	318.694	246.268	220.335	260.452	242.364	344.517	306.481	196.855	256.638	249.505	220.858	high	high	high	high
ENSMUST00000102781	553.789	561.426	577.086	606.606	298.949	266.976	338.738	573.936	467.389	462.849	550.69	317.282	301.916	107.673	high	high	high	high
ENSMUST00000069718	189.485	202.851	171.377	131.28	278.715	276.447	245.476	192.628	174.629	161.997	175.656	250.193	246.011	229.31	high	high	high	high
ENSMUST00000131070	131.213	118.842	159.136	178.36	240.8	218.906	256.776	148.813	114.575	124.156	167.579	226.462	255.064	243.642	high	high	high	high
ENSMUST00000005841	199.792	175.804	208.975	163.874	281.267	284.309	241.255	200.917	167.912	179.823	169.094	256.931	270.152	197.707	high	high	high	high
ENSMUST00000020856	290.571	270.878	326.141	390.22	303.871	279.127	272.978	281.047	288.414	293.659	306.892	287.106	285.875	151.771	high	high	high	high
ENSMUST00000023087	207.72	177.443	244.824	244.453	287.465	271.443	246.429	245.521	256.807	236.116	187.265	285.641	263.323	175.658	high	high	high	high
ENSMUST00000099996	442.001	460.205	460.795	484.379	324.287	315.76	330.705	424.728	318.046	298.976	358.883	296.042	296.992	131.559	high	high	high	high
ENSMUST00000037646	227.541	222.111	194.111	180.171	246.268	232.844	253.236	258.153	268.265	278.961	314.464	262.79	268.405	193.297	high	high	high	high
ENSMUST00000084418	208.513	202.441	191.488	208.238	226.035	251.965	204.904	181.97	168.307	185.14	184.236	227.195	230.765	266.059	high	high	high	high
ENSMUST00000033992	92.7607	99.9911	117.166	135.807	238.977	252.858	202.181	98.6822	114.18	164.499	97.4182	195.847	224.571	303.542	high	high	high	high
ENSMUST00000040873	582.331	585.604	487.9	414.665	243.899	242.494	288.635	555.384	529.023	496.625	569.366	275.241	242.358	206.159	high	high	high	high
ENSMUST00000068825	220.802	231.127	224.714	204.616	256.294	246.068	234.448	200.917	201.89	194.835	186.255	251.511	231.082	241.07	high	high	high	high
ENSMUST00000023133	323.077	350.789	420.573	437.299	262.674	273.23	211.983	363.545	325.552	288.968	330.111	251.657	249.982	221.593	high	high	high	high
ENSMUST00000032168	288.985	322.103	359.367	340.424	292.022	266.797	255.551	303.152	278.537	287.404	323.045	266.452	268.881	187.785	high	high	high	high
ENSMUST00000085774	122.492	112.695	121.538	57.9444	233.326	221.229	237.851	120.787	111.02	127.909	121.647	251.804	240.453	230.78	high	high	high	high
ENSMUST00000066058	457.461	441.764	302.533	227.251	305.694	280.378	298.574	436.176	335.035	304.918	391.187	289.011	290.957	142.951	high	high	high	high
ENSMUST00000021512	238.641	225.39	228.211	214.576	262.31	273.945	223.011	203.68	188.457	191.394	201.398	229.246	246.17	247.317	high	high	high	high
ENSMUST00000023151	207.324	238.503	256.191	197.373	238.977	272.158	230.636	318.152	237.843	263.636	330.111	236.716	255.382	230.045	high	high	high	high
ENSMUST00000015877	89.1929	70.0758	148.643	107.74	223.3	230.7	171.139	82.8931	94.426	98.5119	89.8468	187.498	212.659	321.916	high	high	high	high
ENSMUST00000044681	336.951	352.838	366.362	360.342	312.438	311.293	263.72	323.678	305.008	304.292	344.749	274.069	289.845	158.018	high	high	high	high
ENSMUST00000025759	172.836	207.359	152.141	203.711	229.134	256.254	217.974	193.812	182.926	197.962	183.227	230.71	247.758	243.275	high	high	high	high
ENSMUST00000120722	141.123	128.267	194.985	176.549	238.612	245.889	242.072	166.181	131.959	137.604	116.094	251.218	237.753	231.883	high	high	high	high
ENSMUST00000169922	169.268	142.61	129.407	95.0651	227.128	193.173	265.626	148.813	167.912	143.546	173.132	229.246	254.27	237.027	high	high	high	high
ENSMUST00000064759	378.574	381.933	331.387	290.628	247.727	251.25	259.771	364.335	350.048	367.465	403.806	254.148	243.947	221.961	high	high	high	high
ENSMUST00000024887	211.685	198.343	189.739	211.859	274.523	273.23	260.18	199.733	186.086	177.009	208.465	269.528	273.328	177.128	high	high	high	high
ENSMUST00000058033	229.523	188.098	214.221	188.319	285.642	252.858	279.649	249.469	208.211	224.857	199.379	276.12	277.616	166.103	high	high	high	high
ENSMUST00000064667	124.474	104.499	158.261	108.646	254.289	245.532	237.443	114.077	133.54	165.125	228.15	215.183	267.134	237.027	high	high	high	high
ENSMUST00000042818	204.153	211.866	214.221	303.303	269.054	275.017	261.133	197.364	289.204	294.285	200.893	236.13	270.628	212.406	high	high	high	high
ENSMUST00000137724	121.699	111.056	98.8041	65.1875	255.565	248.034	214.298	113.682	102.723	104.141	126.189	242.575	246.17	230.045	high	high	high	high
ENSMUST00000021066	128.041	122.94	117.166	83.2951	146.193	181.379	175.087	110.919	152.504	173.256	168.084	172.41	187.407	358.665	high	high	high	high
ENSMUST00000021296	77.3005	73.3542	62.0805	49.796	201.426	214.081	160.928	68.6828	60.8435	68.4892	57.5423	179.295	193.919	345.068	high	high	high	high
ENSMUST00000166123	102.671	87.6971	146.895	144.861	207.442	218.906	207.218	114.077	109.834	129.473	123.161	192.185	236.006	289.945	high	high	high	high
ENSMUST00000041124	67.7866	88.5167	74.3217	66.9983	236.243	237.848	239.077	94.3402	102.723	87.5661	85.8088	230.857	262.687	224.533	high	high	high	high
ENSMUST00000025778	347.654	386.851	410.081	564.053	279.627	261.615	236.762	340.256	280.512	286.153	340.711	255.173	268.246	194.032	high	high	high	high
ENSMUST00000074425	149.448	149.577	153.015	111.362	292.387	284.131	289.316	129.076	112.995	128.847	148.399	272.604	301.28	142.216	high	high	high	high
ENSMUST00000021596	165.701	179.082	160.01	101.403	147.652	271.979	312.869	202.496	172.653	292.408	373.016	208.591	186.772	320.446	high	high	high	high
ENSMUST00000041968	83.6432	78.6816	97.0554	94.1597	225.123	212.473	184.481	77.7616	75.0667	79.1222	83.7897	200.828	220.759	293.988	high	high	high	high
ENSMUST00000002305	44.3983	37.2918	33.2262	37.1207	191.218	162.794	178.899	44.2096	59.6583	64.4236	34.3235	148.534	180.578	386.226	high	high	high	high
ENSMUST00000078286	241.416	245.47	207.226	220.913	247.544	260.185	264.128	226.574	213.347	242.37	227.646	251.511	251.252	212.406	high	high	high	high
ENSMUST00000080164	106.239	117.203	159.136	121.321	214.186	223.909	194.829	126.708	118.921	122.28	115.589	210.203	216.947	287.74	high	high	high	high
ENSMUST00000090558	140.727	124.579	87.4373	47.9852	224.212	221.05	179.171	132.234	119.712	105.392	95.9039	193.504	209.324	311.627	high	high	high	high
ENSMUST00000087556	140.33	127.448	168.754	113.173	237.154	215.868	236.762	148.418	126.428	105.079	104.485	226.023	247.758	240.335	high	high	high	high
ENSMUST00000029666	300.085	307.35	276.302	314.168	297.673	278.234	289.316	317.362	276.166	283.964	275.598	294.137	302.075	117.228	high	high	high	high
ENSMUST00000029476	85.2288	89.7461	98.8041	94.1597	233.873	249.642	188.838	78.5511	79.4127	73.8057	76.7231	207.859	221.553	283.331	high	high	high	high
ENSMUST00000041733	206.928	195.065	228.211	189.225	212.181	191.207	213.072	231.311	195.568	192.333	172.627	205.662	215.042	291.415	high	high	high	high
ENSMUST00000031445	236.659	238.503	160.885	164.78	266.138	272.337	260.18	234.469	163.961	212.661	214.017	250.193	254.905	206.894	high	high	high	high
ENSMUST00000094331	104.653	112.695	115.417	109.551	207.988	235.167	187.885	107.366	91.6604	105.079	110.037	187.937	203.765	320.079	high	high	high	high
ENSMUST00000170792	181.161	146.299	146.895	109.551	257.935	262.151	301.977	164.997	139.466	131.662	166.57	287.546	294.451	129.722	high	high	high	high
ENSMUST00000113952	103.86	115.564	79.5679	90.5382	193.588	230.7	193.875	104.603	102.723	128.535	124.17	193.064	216.63	301.337	high	high	high	high
ENSMUST00000092123	99.8961	93.0245	135.528	86.9167	212.363	205.503	214.298	105.787	95.6113	117.901	103.98	194.529	223.459	292.518	high	high	high	high
ENSMUST00000084299	129.627	158.593	139.9	131.28	221.842	236.597	179.444	125.919	111.415	120.091	132.751	191.746	209.959	308.687	high	high	high	high
ENSMUST00000032891	64.6153	85.6481	129.407	76.0521	238.612	205.325	240.166	71.4459	73.0913	74.4312	83.7897	243.308	262.211	204.689	high	high	high	high
ENSMUST00000034983	61.8404	56.1426	68.2011	61.566	188.119	209.971	170.594	59.9988	73.8814	94.4463	75.2089	171.971	196.618	341.393	high	high	high	high
ENSMUST00000034074	153.015	146.299	90.0604	92.349	215.28	241.958	246.973	169.733	135.12	167.314	151.427	227.781	240.294	241.437	high	high	high	high
ENSMUST00000091064	265.993	292.597	291.166	308.735	275.617	259.649	278.968	256.179	270.635	243.934	280.645	256.052	260.146	193.297	high	high	high	high
ENSMUST00000023460	185.521	183.18	199.357	227.251	240.8	249.463	202.181	176.049	158.035	162.623	169.094	225.29	236.8	247.317	high	high	high	high
ENSMUST00000067545	395.62	369.639	394.342	322.316	270.513	243.923	292.175	415.65	303.823	325.558	373.016	266.892	257.923	184.477	high	high	high	high
ENSMUST00000021990	202.171	204.08	185.367	206.427	266.685	263.223	259.363	207.627	160.801	210.471	209.474	263.376	266.658	178.597	high	high	high	high
ENSMUST00000024709	191.468	167.198	223.839	169.306	264.679	243.566	282.78	184.733	188.457	167.314	153.446	213.425	250.458	244.745	high	high	high	high
ENSMUST00000060188	170.854	159.822	248.322	192.846	234.42	248.034	218.927	185.128	156.455	160.434	158.999	219.724	234.259	253.932	high	high	high	high
ENSMUST00000059580	273.525	245.47	330.513	251.696	262.492	248.748	234.448	261.311	261.153	274.27	269.036	223.679	250.141	234.088	high	high	high	high
ENSMUST00000105520	95.932	82.3698	87.4373	67.9036	242.987	232.129	231.452	93.5508	77.0421	78.8095	88.8373	260.153	266.34	181.17	high	high	high	high
ENSMUST00000043839	182.746	174.984	130.282	156.631	232.962	237.133	184.617	163.813	148.553	139.793	154.456	209.031	214.724	283.331	high	high	high	high
ENSMUST00000029405	84.436	88.9265	87.4373	98.6866	214.186	213.723	234.856	78.1563	91.6604	88.817	118.113	195.554	223.3	288.108	high	high	high	high
ENSMUST00000040344	411.873	401.604	311.277	267.993	285.095	258.041	277.743	399.466	391.927	371.53	391.692	275.241	256.811	174.555	high	high	high	high
ENSMUST00000166282	220.406	182.771	168.754	116.794	241.529	241.6	288.499	239.995	195.568	190.769	209.474	266.892	273.805	165.735	high	high	high	high
ENSMUST00000048188	97.914	100.401	170.503	136.713	194.864	165.832	185.434	131.05	120.502	111.647	107.513	171.678	188.836	345.068	high	high	high	high
ENSMUST00000031388	321.491	298.744	230.834	239.926	230.045	206.575	240.711	313.415	242.979	258.32	314.969	244.48	216.312	244.745	high	high	high	high
ENSMUST00000186531	354.79	347.1	361.116	442.732	284.549	271.622	258.274	370.256	292.76	319.304	325.569	275.241	277.299	152.874	high	high	high	high
ENSMUST00000100330	119.32	138.512	160.885	95.9705	266.502	247.14	235.129	138.155	147.763	123.843	165.56	257.956	279.363	167.94	high	high	high	high
ENSMUST00000085678	307.22	294.236	257.94	327.748	244.628	242.136	247.79	324.072	269.845	298.663	308.912	246.091	237.911	220.858	high	high	high	high
ENSMUST00000097414	42.8126	48.7662	97.0554	67.9036	303.324	268.763	303.611	64.7356	72.3011	77.2458	73.1898	203.172	293.181	207.996	high	high	high	high
ENSMUST00000129321	73.3364	68.8464	92.6835	73.3359	207.442	208.005	179.852	68.6828	51.3614	67.8637	61.5804	164.793	206.942	332.573	high	high	high	high
ENSMUST00000060223	185.521	157.363	146.02	108.646	288.012	246.961	278.56	131.445	165.542	179.198	148.399	226.023	254.27	223.798	high	high	high	high
ENSMUST00000034827	163.322	190.557	150.392	210.049	203.614	215.868	165.284	141.708	144.602	139.168	158.494	174.168	190.742	338.821	high	high	high	high
ENSMUST00000025161	230.712	248.339	197.608	181.076	263.039	259.47	209.396	250.653	226.78	225.17	263.988	225.144	245.376	232.985	high	high	high	high
ENSMUST00000047145	178.782	186.049	143.397	107.74	226.399	234.274	203.27	173.681	146.578	161.997	195.846	218.259	220.918	264.221	high	high	high	high
ENSMUST00000041804	284.228	280.303	198.483	162.063	276.71	282.88	365.695	251.442	247.72	327.747	327.083	246.091	306.839	150.301	high	high	high	high
ENSMUST00000147875	239.433	239.733	182.744	182.887	223.483	219.263	237.988	298.02	231.917	258.32	259.95	254.88	240.77	207.261	high	high	high	high
ENSMUST00000020440	179.179	212.276	236.081	296.06	173.901	192.816	137.374	189.47	188.062	167.939	187.77	153.367	161.837	387.696	high	high	high	high
ENSMUST00000074616	170.458	189.327	222.091	156.631	194.317	203.538	263.311	175.26	184.111	185.452	200.893	222.8	241.564	237.762	high	high	high	high
ENSMUST00000056102	363.907	355.706	238.704	210.049	164.604	163.688	185.843	528.147	335.035	401.866	398.254	232.175	222.665	246.95	high	high	high	high
ENSMUST00000020382	126.456	118.022	112.794	105.024	182.651	194.067	154.12	125.919	133.145	160.434	130.732	176.512	175.654	349.11	high	high	high	high
ENSMUST00000165147	150.637	197.523	117.166	76.9575	248.274	241.958	231.316	100.261	102.328	187.954	199.379	205.662	251.094	244.01	high	high	high	high
ENSMUST00000096575	60.6512	60.2406	83.9398	66.0929	293.298	244.817	289.724	59.2093	68.7453	61.2963	63.5994	204.929	298.263	196.972	high	high	high	high
ENSMUST00000021800	160.944	149.987	95.3066	81.4844	247.909	242.673	216.34	180.786	172.258	144.797	126.189	232.761	234.735	232.618	high	high	high	high
ENSMUST00000005015	296.121	295.466	260.563	299.681	229.68	239.813	209.669	262.89	263.129	286.153	281.15	232.468	227.588	239.967	high	high	high	high
ENSMUST00000001326	137.555	130.316	152.141	124.943	278.898	258.755	287.001	142.102	127.613	144.484	138.304	266.892	270.311	162.796	high	high	high	high
ENSMUST00000030207	164.115	152.855	219.468	224.535	333.583	328.984	276.654	140.524	148.158	144.484	129.218	291.501	303.98	103.263	high	high	high	high
ENSMUST00000032322	139.537	67.2072	85.6885	67.9036	282.361	270.728	205.584	110.129	107.859	86.6279	102.971	274.216	265.387	159.121	high	high	high	high
ENSMUST00000114723	103.86	97.9421	107.548	85.1059	195.593	206.933	182.439	108.156	85.7341	87.8788	97.9229	195.115	216.789	286.638	high	high	high	high
ENSMUST00000055506	512.562	542.165	470.413	408.327	263.586	232.487	284.006	579.067	439.338	447.838	393.206	262.644	239.659	196.237	high	high	high	high
ENSMUST00000004965	153.412	154.904	174.875	158.442	242.623	241.6	226.143	153.155	136.305	156.681	150.418	234.958	242.994	220.491	high	high	high	high
ENSMUST00000048393	133.195	170.477	136.402	146.672	211.816	239.635	186.251	127.892	99.5621	141.044	138.304	195.847	207.895	294.355	high	high	high	high
ENSMUST00000040008	134.384	122.94	125.91	105.93	194.682	204.252	168.824	123.945	110.23	126.658	128.713	189.256	194.554	313.097	high	high	high	high
ENSMUST00000040261	430.901	440.125	661.9	562.242	219.837	224.445	174.815	461.043	425.905	392.171	515.357	197.459	209.483	289.945	high	high	high	high
ENSMUST00000045791	233.091	250.388	199.357	202.806	228.769	237.669	241.527	243.943	209.001	254.254	237.236	257.37	253.476	185.947	high	high	high	high
ENSMUST00000078547	150.241	136.054	125.035	80.579	227.675	236.597	245.884	140.918	128.799	134.477	158.494	249.46	237.594	209.466	high	high	high	high
ENSMUST00000050211	242.605	223.341	201.106	220.913	247.544	237.312	218.791	243.943	202.68	222.355	205.436	263.669	243.311	189.254	high	high	high	high
ENSMUST00000133808	216.045	193.835	167.88	147.577	226.217	256.611	220.833	234.074	188.062	209.22	247.331	223.972	236.164	235.925	high	high	high	high
ENSMUST00000114471	179.972	201.212	155.638	155.726	232.779	213.187	253.236	178.417	186.086	160.121	176.16	223.826	239.817	232.25	high	high	high	high
ENSMUST00000084124	251.326	278.254	286.794	328.654	261.398	261.793	228.593	272.758	242.189	269.266	228.15	239.646	236.641	219.388	high	high	high	high
ENSMUST00000032441	235.866	215.964	222.965	249.885	257.57	280.199	244.795	244.732	205.446	220.792	257.931	277.731	269.675	148.096	high	high	high	high
ENSMUST00000028683	293.346	288.909	423.196	397.463	245.175	239.456	206.81	279.863	289.599	255.505	315.978	212.986	223.777	258.342	high	high	high	high
ENSMUST00000030142	193.45	224.16	204.603	247.169	261.216	253.573	209.396	246.706	193.988	199.838	216.541	248.728	256.652	189.622	high	high	high	high
ENSMUST00000080217	40.0377	32.3742	33.2262	32.5937	158.407	189.599	123.351	40.6571	34.3726	43.1576	26.2474	154.686	173.113	366.015	high	high	high	high
ENSMUST00000177236	124.474	109.417	164.382	166.59	234.602	238.026	204.359	123.55	100.352	125.094	114.075	219.578	224.094	249.522	high	high	high	high
ENSMUST00000130216	73.7328	79.911	128.533	121.321	214.915	216.94	153.984	75.788	68.3502	67.551	63.0947	173.289	196.142	323.386	high	high	high	high
ENSMUST00000021770	280.66	286.04	267.558	319.6	244.446	236.597	209.941	265.653	216.903	197.962	267.521	220.31	239.817	232.25	high	high	high	high
ENSMUST00000034378	330.212	291.777	267.558	220.913	276.163	253.931	309.466	287.363	237.843	291.157	306.892	292.819	301.757	97.3834	high	high	high	high
ENSMUST00000076991	136.763	138.922	159.136	188.319	245.904	256.611	248.199	138.155	120.897	117.901	110.542	227.048	255.382	209.466	high	high	high	high
ENSMUST00000041317	127.645	108.597	137.277	111.362	250.461	229.806	239.758	136.576	97.5867	112.585	122.151	229.392	249.029	213.141	high	high	high	high
ENSMUST00000067167	105.842	106.138	90.0604	107.74	218.561	235.703	178.627	99.4717	90.4751	91.9444	93.8849	201.707	216.789	271.938	high	high	high	high
ENSMUST00000021558	476.885	484.383	512.383	372.112	304.053	246.961	356.845	393.545	322.787	394.673	448.225	260.593	254.27	175.29	high	high	high	high
ENSMUST00000084968	154.205	102.86	160.01	145.766	291.111	244.46	263.039	141.313	157.64	175.132	121.647	268.942	269.675	150.669	high	high	high	high
ENSMUST00000092627	76.5077	72.9444	76.0704	61.566	182.104	182.451	188.566	118.419	107.069	91.9444	107.009	262.497	263.958	162.796	high	high	high	high
ENSMUST00000013304	424.162	444.223	505.388	572.201	267.231	262.866	236.626	427.886	381.26	360.585	431.063	244.333	252.999	191.827	high	high	high	high
ENSMUST00000002445	328.23	362.263	298.161	319.6	245.904	251.965	249.56	296.836	320.416	316.802	331.626	246.384	231.4	211.304	high	high	high	high
ENSMUST00000021179	221.991	238.094	286.794	245.359	211.634	215.51	156.435	185.917	194.383	204.529	245.817	169.774	182.801	335.881	high	high	high	high
ENSMUST00000102656	501.463	431.519	382.101	381.166	295.121	258.577	272.569	463.017	411.286	386.542	411.377	302.926	260.781	124.21	high	high	high	high
ENSMUST00000047281	267.579	261.042	298.161	326.843	229.68	236.061	179.444	245.127	230.336	239.869	257.426	201.121	211.706	274.878	high	high	high	high
ENSMUST00000128667	135.573	136.463	143.397	85.1059	250.643	232.308	244.114	142.892	126.428	128.535	132.751	252.683	257.605	177.128	high	high	high	high
ENSMUST00000029784	720.679	646.664	425.82	566.769	277.075	261.793	286.184	620.119	640.437	592.635	712.717	284.177	254.905	148.096	high	high	high	high
ENSMUST00000185633	81.6611	60.2406	88.3117	60.6606	239.888	229.449	215.251	88.0246	66.7698	55.9798	67.6375	236.863	258.558	191.459	high	high	high	high
ENSMUST00000003450	126.059	147.528	102.302	98.6866	211.27	204.788	187.749	140.129	139.466	119.465	124.675	200.681	207.418	278.553	high	high	high	high
ENSMUST00000022690	251.722	226.619	158.261	119.51	231.321	224.624	240.03	235.258	244.559	236.116	242.284	254.587	234.417	197.339	high	high	high	high
ENSMUST00000016138	242.208	266.37	236.081	258.939	269.783	268.763	246.701	245.916	244.954	235.49	238.245	246.97	251.57	187.785	high	high	high	high
ENSMUST00000004200	255.686	260.223	304.282	348.572	243.899	260.364	200.274	252.627	235.472	222.043	239.255	220.75	227.271	237.762	high	high	high	high
ENSMUST00000108249	142.709	122.12	127.658	124.943	251.008	237.49	227.232	133.418	134.33	130.098	126.189	219.138	236.959	229.678	high	high	high	high
ENSMUST00000037001	414.252	445.452	342.754	342.234	260.669	233.202	254.053	398.676	342.146	351.828	419.453	245.798	240.929	198.809	high	high	high	high
ENSMUST00000109468	224.766	227.029	286.794	248.075	271.242	255.718	286.865	216.311	201.89	227.985	217.55	256.052	279.84	149.199	high	high	high	high
ENSMUST00000062000	139.537	107.777	99.6785	86.9167	226.217	253.573	194.965	113.287	115.761	111.647	121.142	215.623	229.812	239.232	high	high	high	high
ENSMUST00000035242	221.991	200.802	226.463	210.049	206.348	233.559	177.946	194.601	196.359	188.267	209.474	222.214	219.488	242.907	high	high	high	high
ENSMUST00000041500	308.806	310.218	251.819	306.924	255.383	242.494	255.959	349.335	260.363	276.459	333.645	284.177	242.358	158.018	high	high	high	high
ENSMUST00000044857	263.218	290.138	210.724	323.221	219.108	235.882	244.25	288.547	235.472	258.007	267.017	245.652	238.706	199.912	high	high	high	high
ENSMUST00000034432	158.169	174.165	207.226	190.13	237.154	260.542	205.72	155.128	169.888	172.943	150.922	217.82	227.906	238.497	high	high	high	high
ENSMUST00000034472	174.025	170.477	161.759	130.375	261.58	272.873	236.898	158.286	138.281	130.724	170.103	229.099	245.217	209.834	high	high	high	high
ENSMUST00000055931	102.275	90.9755	77.8192	66.9983	204.707	216.583	190.336	91.9719	85.339	101.952	94.8944	192.332	203.289	288.475	high	high	high	high
ENSMUST00000171400	435.658	386.851	357.619	319.6	259.575	234.095	227.504	433.807	297.896	321.805	373.016	258.103	230.765	194.767	high	high	high	high
ENSMUST00000033540	185.918	184.41	399.588	320.505	265.591	253.931	219.744	201.312	160.406	155.743	144.361	225.583	254.429	203.586	high	high	high	high
ENSMUST00000138603	115.356	91.3853	57.7086	65.1875	212.728	210.328	160.519	114.077	119.712	98.8246	101.456	199.217	191.06	292.885	high	high	high	high
ENSMUST00000023867	248.155	264.731	236.081	278.858	203.614	212.294	198.505	268.021	227.966	236.741	241.779	215.476	205.83	261.649	high	high	high	high
ENSMUST00000071858	258.461	255.715	230.834	225.44	269.237	256.968	267.532	231.706	241.004	251.753	259.445	251.657	253.635	177.495	high	high	high	high
ENSMUST00000113028	147.069	120.891	175.749	133.091	226.217	224.803	273.795	159.865	129.194	142.92	168.084	218.992	249.346	214.243	high	high	high	high
ENSMUST00000102573	394.035	379.884	352.372	288.817	263.768	251.071	325.803	425.123	372.173	366.839	417.434	294.137	271.899	116.125	high	high	high	high
ENSMUST00000034131	668.352	701.987	885.74	1142.59	288.194	241.6	331.658	711.696	594.212	577.624	657.194	283.737	259.352	138.542	high	high	high	high
ENSMUST00000033519	253.704	270.878	386.473	456.312	257.935	251.25	252.556	302.757	249.696	255.818	241.274	270.554	261.258	149.566	high	high	high	high
ENSMUST00000165201	59.8584	57.372	101.427	65.1875	236.06	207.648	251.466	71.4459	41.4842	61.609	58.0471	208.298	260.464	212.406	high	high	high	high
ENSMUST00000022007	217.631	217.604	230.834	275.236	219.29	255.36	200.002	209.601	166.332	158.244	192.313	220.603	230.129	230.413	high	high	high	high
ENSMUST00000000253	288.589	249.568	366.362	272.52	185.203	176.018	170.322	247.495	240.213	245.185	243.293	173.143	168.349	339.556	high	high	high	high
ENSMUST00000141755	74.5257	78.2718	69.0755	72.4306	172.443	193.53	185.843	84.0773	96.4014	84.4387	84.2945	206.248	208.371	266.426	high	high	high	high
ENSMUST00000108336	53.9122	49.9956	69.0755	65.1875	214.186	231.057	187.613	49.3411	47.8056	48.1614	59.5614	190.574	224.888	265.324	high	high	high	high
ENSMUST00000035608	395.224	367.181	326.141	300.587	237.154	249.999	259.771	393.15	378.099	385.291	413.396	289.011	278.569	113.185	high	high	high	high
ENSMUST00000070726	84.8324	85.2383	77.8192	84.2005	209.264	212.651	172.909	63.5514	84.1537	62.8599	78.2374	171.238	202.812	306.115	high	high	high	high
ENSMUST00000007139	222.388	240.143	259.689	316.884	224.576	236.061	175.904	247.89	220.459	199.213	235.722	196.726	204.877	278.186	high	high	high	high
ENSMUST00000028838	226.748	253.666	236.081	303.303	232.779	243.745	183.256	244.732	201.495	218.29	223.103	202.146	210.595	266.794	high	high	high	high
ENSMUST00000046975	167.683	146.299	157.387	174.739	230.045	216.583	238.668	193.417	208.606	211.097	206.951	216.355	239.341	223.798	high	high	high	high
ENSMUST00000024860	461.028	433.978	313.9	312.357	245.722	222.48	273.114	526.174	372.568	398.113	489.11	271.726	249.664	158.018	high	high	high	high
ENSMUST00000166172	99.8961	74.9934	59.4574	54.3229	199.421	212.651	209.941	93.5508	79.0176	89.7552	75.7136	194.822	216.789	267.529	high	high	high	high
ENSMUST00000039782	139.537	145.479	186.241	134.902	227.493	222.301	210.894	147.234	126.033	128.847	117.104	215.769	235.688	227.105	high	high	high	high
ENSMUST00000035295	160.547	172.116	225.588	191.036	235.149	241.064	190.744	169.339	146.578	158.87	177.17	210.056	226.794	241.07	high	high	high	high
ENSMUST00000113573	121.699	88.5167	208.975	98.6866	273.065	229.985	264.537	104.603	103.908	97.8864	88.3325	228.66	259.987	189.254	high	high	high	high
ENSMUST00000021425	301.274	352.018	359.367	384.787	257.206	271.8	256.368	298.415	273.006	312.423	371.501	264.694	269.199	143.319	high	high	high	high
ENSMUST00000081980	285.814	282.762	258.814	281.574	257.935	276.625	264.128	278.679	229.546	247.061	314.464	276.852	264.911	134.867	high	high	high	high
ENSMUST00000001975	695.309	648.713	469.538	474.42	285.642	273.409	317.771	671.829	589.471	629.225	703.632	311.422	280.157	84.8889	high	high	high	high
ENSMUST00000048309	97.914	95.8931	125.035	86.0113	235.149	195.675	256.232	108.55	116.156	112.585	107.513	182.664	236.164	257.607	high	high	high	high
ENSMUST00000172122	55.4978	50.8152	129.407	54.3229	233.508	183.345	262.358	58.8146	54.5221	65.9873	50.4757	189.549	248.076	238.497	high	high	high	high
ENSMUST00000091299	256.083	247.929	221.216	250.791	239.888	229.806	255.551	288.942	240.213	240.494	236.226	254.148	253.476	168.308	high	high	high	high
ENSMUST00000048807	82.0575	94.2539	101.427	96.8759	218.926	249.642	201.364	79.3405	81.7832	84.7515	90.8563	206.541	230.288	238.865	high	high	high	high
ENSMUST00000033999	187.503	181.541	198.483	223.629	226.946	232.665	185.162	182.365	167.517	157.932	172.627	198.484	209.006	267.896	high	high	high	high
ENSMUST00000122383	136.763	113.515	184.493	126.753	275.799	224.267	260.452	152.365	104.303	122.28	126.694	251.218	272.534	151.036	high	high	high	high
ENSMUST00000082421	802.736	829.025	1708.52	1760.97	257.023	232.844	234.448	802.484	790.571	636.418	997.905	221.335	223.459	229.678	high	high	high	high
ENSMUST00000082392	646.153	668.793	1370.14	1372.56	255.018	249.463	219.608	646.171	637.672	519.455	799.536	214.597	227.112	232.25	high	high	high	high
ENSMUST00000002518	376.989	411.849	473.91	498.865	228.222	222.658	223.556	372.624	431.831	398.426	417.434	234.079	217.424	221.961	high	high	high	high
ENSMUST00000047652	140.727	129.497	109.297	105.93	218.561	216.94	185.57	109.34	125.638	161.059	142.846	208.591	222.188	242.54	high	high	high	high
ENSMUST00000064099	836.432	810.174	642.664	562.242	232.05	214.081	267.396	787.09	745.531	665.502	746.031	294.137	238.229	140.747	high	high	high	high
ENSMUST00000033009	181.161	174.984	209.849	163.874	253.56	234.452	251.33	201.707	182.926	177.947	189.789	220.75	243.629	208.731	high	high	high	high
ENSMUST00000021077	305.634	329.479	313.9	309.641	246.815	230.342	277.471	260.916	293.55	335.253	341.721	240.525	242.358	189.622	high	high	high	high
ENSMUST00000069965	63.0297	64.7484	98.8041	77.8628	200.697	208.72	206.673	70.6565	64.3993	87.5661	98.9324	183.836	197.889	289.945	high	high	high	high
ENSMUST00000043325	110.996	90.9755	100.553	88.7274	198.145	213.366	208.443	93.9455	82.5734	89.1298	80.2564	189.842	199.954	281.493	high	high	high	high
ENSMUST00000035579	386.503	381.933	310.402	301.492	253.924	230.521	272.569	365.519	324.762	321.493	298.816	254.88	234.1	182.272	high	high	high	high
ENSMUST00000119706	85.6252	82.3698	83.0654	67.9036	266.685	201.572	217.293	85.6562	88.8948	78.8095	62.5899	165.672	212.659	292.885	high	high	high	high
ENSMUST00000031654	235.866	237.684	294.664	345.856	205.072	212.294	156.707	240.785	222.039	221.417	240.769	173.436	190.266	307.217	high	high	high	high
ENSMUST00000022875	346.465	316.365	275.427	245.359	259.758	245.889	239.621	335.914	275.771	305.856	340.711	245.212	256.97	168.675	high	high	high	high
ENSMUST00000076219	152.619	138.922	122.412	135.807	206.166	229.806	198.505	131.445	145.787	145.735	137.294	216.941	212.659	239.967	high	high	high	high
ENSMUST00000030501	169.665	150.397	146.02	96.8759	212.91	214.974	210.349	160.655	139.071	132.287	165.056	221.921	220.918	226.37	high	high	high	high
ENSMUST00000113523	430.505	445.862	501.016	392.03	266.32	224.088	242.481	425.123	356.369	350.577	465.386	253.122	246.647	169.41	high	high	high	high
ENSMUST00000045970	151.033	136.463	123.287	95.9705	218.743	222.122	204.767	178.812	136.305	205.78	194.836	239.646	215.518	213.508	high	high	high	high
ENSMUST00000035112	129.627	114.334	122.412	83.2951	189.76	180.843	182.031	119.603	149.343	121.967	126.189	178.709	202.495	287.373	high	high	high	high
ENSMUST00000102927	92.7607	97.5323	133.779	80.579	239.159	211.043	240.711	102.63	84.5488	96.9482	84.2945	231.443	232.67	204.321	high	high	high	high
ENSMUST00000047086	175.611	178.263	159.136	195.562	247.18	240.528	239.213	169.733	165.147	163.248	168.589	228.806	237.435	201.749	high	high	high	high
ENSMUST00000064107	251.326	232.356	180.121	159.347	234.055	230.7	260.452	269.205	178.975	218.603	219.065	269.089	253.635	145.156	high	high	high	high
ENSMUST00000020922	89.1929	111.466	149.518	111.362	236.06	227.662	233.767	93.9455	125.638	130.724	111.551	206.98	228.224	232.618	high	high	high	high
ENSMUST00000189220	69.3723	50.4054	71.6986	47.0799	202.338	192.637	207.626	67.4987	78.6225	61.9217	55.0186	193.504	208.848	265.324	high	high	high	high
ENSMUST00000034197	178.386	147.938	97.9298	125.848	232.05	230.7	226.96	194.996	134.725	146.048	162.532	239.353	230.923	196.972	high	high	high	high
ENSMUST00000021413	83.6432	87.2873	92.6835	93.2543	163.146	212.115	163.787	121.577	130.774	147.299	124.675	162.01	185.978	318.976	high	high	high	high
ENSMUST00000053705	123.284	110.236	73.4473	80.579	188.666	196.39	190.336	103.419	77.0421	102.265	86.3135	174.9	183.913	307.952	high	high	high	high
ENSMUST00000084238	290.174	283.172	191.488	146.672	221.478	220.157	218.246	295.652	256.412	272.393	286.197	212.839	215.2	238.497	high	high	high	high
ENSMUST00000025804	570.438	588.063	664.523	710.725	279.627	256.432	276.654	588.541	534.949	517.265	576.938	295.163	259.511	111.715	high	high	high	high
ENSMUST00000002733	342.104	347.51	330.513	326.843	270.513	275.374	269.166	296.047	291.97	282.713	310.931	270.993	260.305	134.867	high	high	high	high
ENSMUST00000024005	249.74	280.303	370.734	414.665	249.003	249.463	193.739	244.337	211.767	210.784	257.931	211.814	227.588	226.738	high	high	high	high
ENSMUST00000044355	272.336	284.811	417.076	459.029	176.817	189.599	138.599	290.126	281.698	252.691	323.549	151.903	167.872	346.17	high	high	high	high
ENSMUST00000036872	269.957	234.405	221.216	232.683	254.471	224.445	250.649	238.022	231.126	256.131	257.931	260.3	242.835	162.796	high	high	high	high
ENSMUST00000029803	229.523	220.472	230.834	293.344	221.113	228.913	201.091	222.627	193.198	207.344	228.655	196.14	211.865	257.607	high	high	high	high
ENSMUST00000036333	482.038	436.847	525.498	451.786	271.424	242.136	311.78	465.385	410.101	432.201	456.301	278.61	282.54	103.998	high	high	high	high
ENSMUST00000027068	174.025	152.446	196.734	221.819	281.085	249.821	264.809	163.813	154.874	177.009	172.627	263.669	277.299	123.842	high	high	high	high
ENSMUST00000049501	179.972	177.443	173.126	156.631	222.936	237.848	211.575	202.101	166.727	151.364	161.522	234.519	235.053	195.134	high	high	high	high
ENSMUST00000109162	317.527	347.51	366.362	344.045	242.805	235.525	233.495	369.861	305.403	278.335	338.692	239.939	228.065	195.869	high	high	high	high
ENSMUST00000058265	229.127	250.797	306.031	362.153	228.222	233.916	217.838	271.968	203.47	188.893	215.027	221.628	219.806	222.328	high	high	high	high
ENSMUST00000040835	153.412	153.265	139.9	174.739	203.067	223.552	174.951	147.629	129.984	143.546	147.894	194.09	203.765	265.691	high	high	high	high
ENSMUST00000102494	89.5894	93.0245	104.925	82.3898	171.531	209.435	193.059	93.156	85.339	84.126	83.7897	191.306	193.601	278.553	high	high	high	high
ENSMUST00000100167	222.388	218.833	241.327	245.359	239.524	238.384	188.974	219.469	176.999	164.499	208.97	202.293	220.283	240.702	high	high	high	high
ENSMUST00000022782	598.584	579.867	461.669	461.745	256.659	235.525	292.311	546.305	482.402	503.818	550.186	300.583	253.317	109.143	high	high	high	high
ENSMUST00000045110	91.175	84.0089	54.2111	76.0521	236.243	239.277	227.504	109.735	88.4997	85.6897	89.8468	220.603	235.847	206.526	high	high	high	high
ENSMUST00000049470	94.7427	86.8775	120.663	108.646	173.354	179.235	164.467	116.84	114.575	117.276	121.142	203.318	215.359	244.01	high	high	high	high
ENSMUST00000021532	128.438	138.922	142.523	62.4714	197.78	230.7	224.373	88.814	93.6358	103.516	91.3611	187.058	242.994	232.618	high	high	high	high
ENSMUST00000024858	256.876	264.731	327.015	243.548	242.987	241.243	195.782	265.258	239.028	214.224	277.112	215.623	222.665	224.166	high	high	high	high
ENSMUST00000118152	82.0575	72.9444	78.6936	47.0799	288.559	244.817	295.306	91.1824	88.4997	108.519	88.8373	218.699	262.37	181.17	high	high	high	high
ENSMUST00000023449	222.388	263.091	201.98	220.913	239.888	236.776	289.724	216.706	212.557	227.046	238.75	255.173	256.335	150.669	high	high	high	high
ENSMUST00000072837	335.762	272.107	166.131	184.698	252.648	225.875	238.805	343.809	244.954	272.706	257.426	245.945	232.353	183.742	high	high	high	high
ENSMUST00000022894	292.553	296.285	428.443	373.017	270.877	266.261	206.673	303.152	277.352	266.764	319.007	220.603	241.088	200.279	high	high	high	high
ENSMUST00000033578	143.105	164.33	111.045	109.551	249.003	243.923	231.044	157.892	128.404	131.349	118.113	231.443	241.088	188.887	high	high	high	high
ENSMUST00000040531	528.022	457.746	378.603	286.101	197.598	212.473	234.039	535.252	410.101	441.896	516.872	228.66	216.947	215.346	high	high	high	high
ENSMUST00000003527	984.69	1030.24	1002.03	861.924	207.624	203.359	233.495	942.613	863.662	793.099	942.887	225.144	194.871	240.702	high	high	high	high
ENSMUST00000041736	352.015	373.737	454.674	452.691	285.825	273.945	223.42	393.15	330.293	306.481	392.196	261.032	256.335	143.319	high	high	high	high
ENSMUST00000151243	148.258	159.822	155.638	147.577	224.759	233.559	209.396	141.708	107.464	120.716	141.332	249.753	242.676	167.573	high	high	high	high
ENSMUST00000020227	239.433	234.405	234.332	231.778	227.675	234.631	284.823	230.522	190.432	236.116	264.998	241.99	245.694	171.983	high	high	high	high
ENSMUST00000120173	177.989	169.657	187.116	125.848	204.16	216.225	179.171	164.602	142.232	171.692	203.922	182.81	202.177	274.511	high	high	high	high
ENSMUST00000181605	237.848	247.519	266.684	200.089	281.267	273.051	220.833	242.364	199.914	194.835	251.369	254.587	250.299	154.343	high	high	high	high
ENSMUST00000097542	180.764	159.412	131.156	176.549	214.733	222.301	243.434	172.497	141.046	141.044	136.284	233.494	243.153	182.272	high	high	high	high
ENSMUST00000096261	258.065	281.942	306.031	384.787	223.118	234.274	179.988	253.811	231.917	225.17	281.15	197.459	214.565	246.582	high	high	high	high
ENSMUST00000076961	330.608	352.018	451.176	481.663	235.514	239.277	180.533	315.783	298.686	281.462	332.635	195.554	209.324	252.829	high	high	high	high
ENSMUST00000103143	186.711	125.809	112.794	98.6866	231.686	206.218	224.917	179.996	166.727	144.171	147.894	222.8	226	208.731	high	high	high	high
ENSMUST00000043938	110.599	127.038	129.407	120.416	186.114	190.85	146.496	124.34	88.4997	137.917	127.199	196.873	188.201	272.306	high	high	high	high
ENSMUST00000047404	399.188	389.31	379.478	370.301	263.039	229.449	286.048	360.388	337.01	327.435	342.73	268.063	243.788	145.524	high	high	high	high
ENSMUST00000109241	162.133	165.149	133.779	153.01	261.763	252.68	253.645	163.418	139.071	178.885	162.027	243.161	253.476	160.591	high	high	high	high
ENSMUST00000031423	198.999	165.149	264.935	193.752	275.252	259.828	223.692	185.523	179.765	172.63	190.798	234.079	252.046	170.88	high	high	high	high
ENSMUST00000025208	241.812	230.307	184.493	150.293	221.478	210.507	241.664	242.364	219.669	225.483	244.807	243.454	233.782	178.965	high	high	high	high
ENSMUST00000017629	399.981	405.702	558.724	468.988	232.415	218.012	227.64	406.966	347.282	329.311	369.987	223.679	215.2	217.183	high	high	high	high
ENSMUST00000025364	246.173	249.568	258.814	287.911	271.059	257.683	258.41	223.022	188.852	178.572	202.912	257.224	273.011	125.68	high	high	high	high
ENSMUST00000073337	204.153	198.343	121.538	91.4436	214.186	208.362	236.082	187.891	166.727	173.569	195.341	219.578	230.288	205.791	high	high	high	high
ENSMUST00000051870	76.1113	66.7974	75.1961	56.1337	218.014	238.563	210.077	74.9985	58.473	62.2345	67.6375	206.541	229.971	219.021	high	high	high	high
ENSMUST00000106429	168.079	159.002	193.236	263.466	159.318	180.843	123.351	161.444	152.504	147.924	176.665	134.618	138.491	382.184	high	high	high	high
ENSMUST00000090678	126.456	134.414	171.377	174.739	224.759	247.497	193.195	150.786	130.774	145.422	126.694	203.318	234.576	216.816	high	high	high	high
ENSMUST00000059975	66.5974	54.0936	99.6785	88.7274	168.432	180.128	127.163	70.2618	47.0155	54.4161	55.0186	142.967	158.184	353.52	high	high	high	high
ENSMUST00000034249	457.064	433.568	594.574	697.144	259.758	239.456	226.007	453.149	393.508	356.519	446.71	235.984	236.323	181.905	high	high	high	high
ENSMUST00000009435	220.009	210.637	241.327	219.102	254.471	244.281	227.776	195.391	181.74	207.031	227.646	232.615	252.523	169.043	high	high	high	high
ENSMUST00000033096	308.409	327.43	348.875	278.858	286.736	286.632	239.621	317.362	264.709	278.961	326.578	244.773	254.429	154.343	high	high	high	high
ENSMUST00000027650	177.197	193.016	283.297	154.82	266.867	250.893	215.387	150.392	143.812	135.415	168.084	245.212	257.605	150.669	high	high	high	high
ENSMUST00000044977	103.86	90.5657	80.4423	70.6198	251.737	263.044	218.382	95.1297	79.8077	91.0062	90.8563	234.372	253.635	164.266	high	high	high	high
ENSMUST00000034388	191.864	229.488	204.603	219.102	209.994	214.974	192.514	194.601	192.408	191.082	203.417	198.191	198.207	255.402	high	high	high	high
ENSMUST00000035800	171.647	193.425	200.231	127.659	198.327	234.631	258.274	193.812	160.011	164.812	186.76	237.449	249.664	164.633	high	high	high	high
ENSMUST00000023497	98.7069	81.1404	80.4423	42.553	204.525	200.857	188.157	99.8664	82.9685	75.9949	79.7517	172.264	202.812	275.981	high	high	high	high
ENSMUST00000082402	837.621	864.677	1828.31	1853.32	227.493	203.716	226.007	828.931	817.832	663.939	1045.86	213.865	207.736	229.31	high	high	high	high
ENSMUST00000021471	63.0297	52.0446	84.8142	78.7682	236.06	238.384	191.289	57.2357	69.9306	70.9911	42.9044	204.929	221.553	224.166	high	high	high	high
ENSMUST00000026902	66.5974	55.7328	60.3317	54.3229	199.968	230.164	179.308	53.2884	110.625	134.477	68.647	174.607	204.401	271.571	high	high	high	high
ENSMUST00000030637	164.511	147.938	146.895	86.0113	234.42	234.095	180.669	160.26	124.058	139.168	152.437	191.746	210.912	247.685	high	high	high	high
ENSMUST00000023491	120.51	139.742	124.161	104.119	194.135	195.675	168.688	155.918	143.417	131.036	144.361	181.785	186.772	281.493	high	high	high	high
ENSMUST00000102960	119.32	113.924	139.025	121.321	233.873	224.445	205.584	118.419	99.5621	116.651	108.018	222.068	235.37	192.562	high	high	high	high
ENSMUST00000111325	319.905	317.185	295.538	312.357	259.758	261.079	223.828	337.099	262.338	272.706	309.416	250.632	249.664	149.566	high	high	high	high
ENSMUST00000009774	244.587	242.192	253.568	319.6	267.961	253.394	225.87	254.205	256.807	265.513	262.979	226.462	245.852	177.495	high	high	high	high
ENSMUST00000061455	87.2109	82.7796	44.593	44.3637	179.552	203.538	241.527	74.209	89.6849	102.89	97.9229	185.594	235.688	227.84	high	high	high	high
ENSMUST00000034524	305.634	305.711	311.277	380.26	261.945	270.192	208.716	300.389	256.412	257.069	338.692	233.347	237.911	177.862	high	high	high	high
ENSMUST00000160197	742.878	658.138	666.272	514.257	266.867	233.559	329.343	716.038	555.889	536.968	622.366	268.796	250.299	129.722	high	high	high	high
ENSMUST00000021668	132.402	126.628	127.658	139.429	190.489	223.194	167.735	113.682	197.939	226.421	127.199	193.65	198.842	256.137	high	high	high	high
ENSMUST00000054865	372.232	369.639	553.478	494.339	257.752	229.449	278.696	425.913	353.604	325.558	372.006	276.706	279.681	92.2386	high	high	high	high
ENSMUST00000022962	288.192	295.875	407.458	442.732	267.778	266.797	233.631	335.125	253.646	231.737	259.95	237.742	246.329	163.898	high	high	high	high
ENSMUST00000052556	76.1113	68.0268	83.0654	85.1059	248.274	217.476	210.213	67.1039	74.6716	68.1765	59.0566	201.853	223.3	222.328	high	high	high	high
ENSMUST00000037299	72.1472	74.1738	83.9398	51.6068	210.358	227.662	168.28	64.7356	68.3502	71.9293	65.1137	180.467	201.065	265.691	high	high	high	high
ENSMUST00000045866	331.798	333.167	276.302	284.29	266.685	279.484	321.991	305.52	282.093	285.215	267.521	274.655	278.569	93.7085	high	high	high	high
ENSMUST00000049138	172.836	169.247	131.156	149.388	222.571	223.731	238.941	208.022	194.383	191.394	196.855	253.269	239.182	154.343	high	high	high	high
ENSMUST00000025823	174.025	190.967	177.498	179.266	190.307	193.709	171.547	181.97	145.787	174.194	182.722	191.014	192.966	262.751	high	high	high	high
ENSMUST00000067384	266.786	242.601	250.071	291.533	257.388	231.057	262.358	200.522	210.977	246.123	180.703	214.158	223.935	208.364	high	high	high	high
ENSMUST00000115777	65.0117	38.1114	76.0704	61.566	203.614	214.796	187.885	64.7356	45.4351	51.6014	49.971	211.375	218.536	216.081	high	high	high	high
ENSMUST00000186458	291.364	281.942	211.598	143.956	209.629	210.328	240.438	345.388	276.166	291.157	310.426	260.739	235.688	149.199	high	high	high	high
ENSMUST00000190224	143.502	131.136	121.538	114.078	193.77	211.758	189.791	139.734	97.5867	126.345	115.589	219.285	211.071	214.611	high	high	high	high
ENSMUST00000020754	239.83	240.962	377.729	394.747	220.931	224.981	172.364	224.996	197.149	194.835	237.236	187.351	199.16	257.974	high	high	high	high
ENSMUST00000037585	93.9499	79.5012	93.5579	79.6736	200.697	184.059	223.964	116.84	110.625	103.516	93.8849	200.242	219.965	224.166	high	high	high	high
ENSMUST00000054908	234.28	272.927	285.046	326.843	237.336	232.844	227.776	247.495	206.236	214.224	231.684	234.372	235.053	174.923	high	high	high	high
ENSMUST00000005975	367.475	405.702	347.126	328.654	234.238	224.981	232.814	367.493	351.233	306.481	360.397	230.71	216.947	196.604	high	high	high	high
ENSMUST00000040110	265.597	221.702	167.88	162.969	215.827	198.713	242.753	268.81	193.988	221.104	234.207	243.894	216.947	183.375	high	high	high	high
ENSMUST00000183663	114.167	99.9911	101.427	64.2821	279.445	255.003	304.156	117.629	112.995	110.396	128.208	278.024	279.522	85.9914	high	high	high	high
ENSMUST00000014321	99.8961	101.221	105.799	103.214	202.702	226.59	163.378	108.945	82.1783	86.9406	81.7707	187.205	200.43	255.769	high	high	high	high
ENSMUST00000068387	146.276	143.84	145.146	68.809	223.118	206.575	207.899	149.208	129.194	137.291	112.561	199.51	228.382	214.978	high	high	high	high
ENSMUST00000049130	237.055	241.782	297.287	337.707	220.202	223.194	164.876	238.811	207.026	213.286	223.103	185.74	195.666	261.281	high	high	high	high
ENSMUST00000110819	229.92	236.864	253.568	178.36	224.394	198.355	269.029	223.417	150.924	162.935	184.741	229.978	213.612	198.442	high	high	high	high
ENSMUST00000025961	294.931	296.695	368.985	370.301	279.809	263.044	248.335	305.915	269.845	242.996	284.178	258.542	259.829	123.107	high	high	high	high
ENSMUST00000038539	211.288	247.109	290.292	308.735	233.873	251.607	209.26	228.153	199.914	210.471	252.883	214.597	232.512	194.032	high	high	high	high
ENSMUST00000138762	153.412	177.443	211.598	173.833	265.226	244.102	332.202	166.181	161.591	159.808	138.304	254.734	276.822	109.143	high	high	high	high
ENSMUST00000020283	302.463	282.762	294.664	308.735	245.722	232.129	225.326	281.836	245.745	237.367	248.845	250.193	239.5	150.301	high	high	high	high
ENSMUST00000052183	82.8503	88.5167	90.9348	104.119	206.712	226.947	194.42	96.7086	90.4751	92.8826	82.2755	197.605	217.106	225.268	high	high	high	high
ENSMUST00000042412	40.4341	33.6036	32.3518	35.3099	199.786	206.218	172.636	24.4732	75.4618	126.033	126.189	163.768	205.83	268.631	high	high	high	high
ENSMUST00000002923	360.339	395.047	406.583	418.286	245.175	234.274	244.931	355.651	339.776	331.813	379.073	235.105	229.812	172.718	high	high	high	high
ENSMUST00000039694	250.137	275.385	285.92	345.856	242.987	249.284	199.185	269.205	233.497	222.668	258.436	227.927	240.294	169.41	high	high	high	high
ENSMUST00000034541	338.537	349.969	318.272	347.667	281.085	256.075	264.945	345.783	288.414	297.725	368.473	256.784	262.846	117.963	high	high	high	high
ENSMUST00000053177	118.528	133.595	179.246	76.9575	262.492	221.05	264.809	124.734	91.2653	94.1336	101.456	233.933	254.27	149.199	high	high	high	high
ENSMUST00000082024	178.386	150.397	222.091	175.644	232.05	204.61	236.082	188.286	147.763	147.611	147.389	238.034	224.729	174.555	high	high	high	high
ENSMUST00000026568	386.503	401.604	482.654	429.151	248.638	225.339	240.983	407.36	349.653	334.315	431.568	270.7	253.793	112.818	high	high	high	high
ENSMUST00000033463	288.985	290.138	316.523	266.182	249.003	215.689	250.105	250.653	209.397	240.807	248.341	239.06	231.4	166.838	high	high	high	high
ENSMUST00000029766	187.107	216.784	176.623	235.399	243.716	261.615	220.697	198.549	176.209	159.808	189.789	230.417	219.647	187.05	high	high	high	high
ENSMUST00000065086	158.962	129.087	127.658	89.6328	240.8	229.985	235.129	127.497	106.279	111.021	115.085	228.513	243.947	164.633	high	high	high	high
ENSMUST00000020258	231.902	234.815	247.448	223.629	215.644	193.888	231.997	254.6	228.361	224.857	270.55	242.722	226.794	167.573	high	high	high	high
ENSMUST00000019470	254.894	238.913	207.226	228.156	267.961	273.409	245.067	233.285	201.89	223.294	238.75	246.53	251.729	137.807	high	high	high	high
ENSMUST00000020776	176.8	201.621	160.01	185.603	212.181	224.088	277.743	180.391	150.924	191.707	195.846	246.53	277.299	112.083	high	high	high	high
ENSMUST00000020341	227.145	232.356	196.734	184.698	206.53	233.38	192.786	202.496	177.394	185.14	196.351	218.406	192.172	225.268	high	high	high	high
ENSMUST00000064200	354.79	367.59	352.372	440.016	228.404	236.239	224.917	402.624	333.454	335.253	394.216	254.88	243.153	137.439	high	high	high	high
ENSMUST00000025293	490.759	485.613	707.368	818.465	269.237	250.893	231.18	470.517	444.079	391.858	520.91	234.226	234.735	166.47	high	high	high	high
ENSMUST00000114036	30.5238	33.1938	48.0905	27.1615	196.869	198.534	151.942	29.9994	24.1004	27.208	29.2759	157.469	185.025	292.518	high	high	high	high
ENSMUST00000075540	287.796	247.929	203.729	210.954	192.312	183.523	179.716	400.65	312.119	343.071	370.492	248.142	237.911	148.831	high	high	high	high
ENSMUST00000162372	88.7965	86.8775	128.533	105.024	140.725	155.468	118.449	103.814	83.3635	98.8246	111.551	133.006	149.449	352.418	high	high	high	high
ENSMUST00000026425	155.79	173.345	174	159.347	227.311	231.951	195.782	144.076	165.147	169.19	166.57	214.304	216.312	203.954	high	high	high	high
ENSMUST00000060251	201.774	177.033	227.337	199.184	193.77	219.084	170.186	180.391	183.716	161.059	181.713	190.281	196.618	247.317	high	high	high	high
ENSMUST00000057500	165.701	169.657	233.458	215.481	164.969	175.482	122.942	176.444	154.874	144.797	161.522	140.33	152.308	341.393	high	high	high	high
ENSMUST00000058578	70.1651	54.5034	60.3317	53.4175	211.634	234.81	212.119	48.9464	84.5488	80.3732	80.7612	190.428	211.547	231.883	high	high	high	high
ENSMUST00000052168	54.3086	38.931	36.7237	43.4583	228.404	238.205	196.735	61.9724	54.9172	53.4779	45.9329	199.949	238.388	195.502	high	high	high	high
ENSMUST00000020112	221.198	206.949	263.186	236.305	219.655	198.355	271.48	226.18	210.582	213.286	237.236	193.357	207.736	232.618	high	high	high	high
ENSMUST00000009538	257.668	241.372	182.744	162.063	245.722	250.357	251.602	249.469	179.765	185.452	200.893	242.429	244.582	146.626	high	high	high	high
ENSMUST00000041551	376.592	382.753	292.041	365.774	191.765	170.121	199.321	404.597	343.726	332.126	361.911	205.369	179.625	248.052	high	high	high	high
ENSMUST00000184181	44.7947	56.1426	50.7136	27.1615	151.662	161.901	110.553	93.5508	60.0534	74.4312	51.4853	149.119	158.978	324.489	high	high	high	high
ENSMUST00000026990	84.0396	96.7127	64.7036	69.7144	180.828	217.297	143.092	93.156	78.2274	89.4425	70.1613	171.824	173.272	287.373	high	high	high	high
ENSMUST00000054387	147.069	119.252	130.282	123.132	221.113	226.947	220.697	150.786	129.984	120.091	123.161	209.47	223.618	199.177	high	high	high	high
ENSMUST00000114900	100.293	98.7617	93.5579	108.646	257.206	231.057	238.124	103.814	73.4863	85.3769	98.9324	256.491	273.169	102.528	high	high	high	high
ENSMUST00000005711	309.599	336.446	400.463	468.082	241.164	253.752	200.138	318.546	290.39	275.833	338.692	218.992	226.953	185.947	high	high	high	high
ENSMUST00000000291	113.771	98.3519	66.4523	48.8906	185.203	189.599	176.721	97.1033	77.0421	112.898	95.3991	174.754	203.924	253.197	high	high	high	high
ENSMUST00000079833	155.79	156.953	174.875	170.212	199.239	195.317	206.537	159.471	136.7	139.793	141.837	195.994	210.277	224.9	high	high	high	high
ENSMUST00000031598	220.802	231.537	174	187.414	192.13	198.534	220.152	186.312	201.89	242.683	192.817	199.656	191.854	239.232	high	high	high	high
ENSMUST00000024857	24.5776	23.3586	28.8543	23.5399	121.949	165.832	177.674	26.4468	67.9551	117.901	56.0281	135.643	168.666	326.326	high	high	high	high
ENSMUST00000079970	178.386	227.029	168.754	205.522	233.691	256.611	207.763	169.339	167.912	191.394	165.056	221.335	236.006	173.085	high	high	high	high
ENSMUST00000010421	327.041	317.595	250.071	227.251	182.104	177.984	169.505	369.466	348.863	373.407	369.482	186.326	185.342	258.709	high	high	high	high
ENSMUST00000051803	270.354	295.466	308.654	331.37	252.648	243.745	216.885	262.1	234.287	246.436	259.95	219.431	220.441	190.357	high	high	high	high
ENSMUST00000055946	221.198	226.619	267.558	174.739	238.43	203.002	227.504	211.18	174.234	155.43	166.57	224.705	221.871	183.007	high	high	high	high
ENSMUST00000004576	219.613	242.192	173.126	172.023	214.551	212.473	217.429	239.6	180.95	207.344	234.207	241.843	247.282	140.379	high	high	high	high
ENSMUST00000025659	95.932	106.138	125.035	135.807	224.759	229.091	186.115	96.7086	95.2162	92.2571	102.971	188.377	205.354	235.558	high	high	high	high
ENSMUST00000136008	53.5158	52.0446	60.3317	57.9444	182.468	186.561	143.092	55.6568	49.386	45.9722	38.3616	155.565	187.248	286.27	high	high	high	high
ENSMUST00000046386	140.727	91.3853	80.4423	62.4714	254.836	227.841	210.077	107.366	104.698	111.96	111.551	207.713	225.047	196.237	high	high	high	high
ENSMUST00000025570	231.109	240.143	257.94	248.075	229.68	244.996	238.396	248.679	200.705	232.363	243.293	240.818	239.976	148.096	high	high	high	high
ENSMUST00000061656	109.806	110.236	151.267	105.024	229.863	193.709	223.147	129.076	113.785	97.2609	85.304	190.574	227.271	210.569	high	high	high	high
ENSMUST00000048957	675.884	622.486	582.332	530.554	211.452	199.785	227.368	738.143	578.409	526.022	573.909	224.558	211.547	192.194	high	high	high	high
ENSMUST00000062957	334.176	317.595	248.322	265.277	229.316	224.981	225.598	344.598	265.104	278.022	320.521	223.093	228.859	176.025	high	high	high	high
ENSMUST00000088194	329.816	366.361	375.98	387.503	266.138	266.082	237.579	328.415	293.55	268.015	320.016	243.454	245.058	139.277	high	high	high	high
ENSMUST00000019615	499.084	552	624.302	695.333	241.894	233.916	282.917	487.885	474.501	445.962	527.976	274.069	242.2	110.245	high	high	high	high
ENSMUST00000003100	122.095	143.02	129.407	153.915	246.451	239.277	215.251	103.814	299.872	359.959	464.882	211.668	217.265	197.339	high	high	high	high
ENSMUST00000046207	202.567	213.096	271.93	356.72	202.52	219.799	161.2	258.942	190.827	190.144	218.56	181.199	188.836	256.137	high	high	high	high
ENSMUST00000118174	71.7508	81.5502	114.543	54.3229	210.905	192.816	199.321	62.3672	55.7074	69.1147	86.8183	164.94	205.989	255.034	high	high	high	high
ENSMUST00000020490	82.0575	87.6971	99.6785	67.9036	209.994	208.541	226.279	81.7089	113.785	135.415	125.18	189.549	237.911	198.442	high	high	high	high
ENSMUST00000032114	160.547	183.59	135.528	146.672	196.869	220.335	216.476	152.365	124.453	171.379	173.637	197.166	207.418	220.858	high	high	high	high
ENSMUST00000054963	465.389	481.105	493.146	573.107	229.68	219.799	240.574	415.65	429.065	398.426	448.729	227.048	220.6	177.128	high	high	high	high
ENSMUST00000048545	280.66	276.615	395.217	294.249	245.539	231.057	228.593	267.232	288.809	264.262	350.806	223.826	242.835	157.651	high	high	high	high
ENSMUST00000095383	77.3005	70.0758	92.6835	88.7274	205.801	214.796	219.471	67.1039	71.1158	75.0567	69.1518	201.853	215.677	206.526	high	high	high	high
ENSMUST00000037315	489.967	477.417	438.061	445.448	247.362	198.891	262.767	477.622	425.115	466.289	469.424	250.778	240.135	133.029	high	high	high	high
ENSMUST00000010188	398.792	411.029	362.865	391.125	273.429	264.116	266.851	474.464	375.333	337.442	507.281	287.399	263.323	73.1294	high	high	high	high
ENSMUST00000036381	262.029	261.452	227.337	237.21	230.956	232.487	249.969	268.81	252.461	281.462	285.188	230.124	227.429	166.103	high	high	high	high
ENSMUST00000019859	117.735	132.775	95.3066	118.605	195.046	211.758	178.491	106.972	94.8211	108.519	117.104	197.459	197.571	228.575	high	high	high	high
ENSMUST00000047497	425.351	411.849	333.136	334.086	246.633	234.095	249.288	435.386	354.789	352.766	416.93	246.238	239.659	137.072	high	high	high	high
ENSMUST00000022705	171.25	185.639	168.754	180.171	200.15	225.16	194.42	155.918	152.504	150.739	173.637	201.267	209.165	212.406	high	high	high	high
ENSMUST00000076734	424.162	438.896	397.84	359.437	275.981	232.844	276.109	433.807	346.492	344.322	369.482	280.075	249.982	92.6061	high	high	high	high
ENSMUST00000059428	354.393	339.724	226.463	264.372	257.752	235.525	274.884	316.573	267.87	272.393	317.492	267.77	250.141	104.733	high	high	high	high
ENSMUST00000020308	171.647	154.904	133.779	175.644	227.675	224.088	241.664	114.471	134.33	152.302	121.647	202.586	250.617	169.41	high	high	high	high
ENSMUST00000029907	85.2288	107.368	105.799	116.794	193.041	196.747	218.655	114.866	92.8456	94.4463	90.8563	211.521	217.265	193.664	high	high	high	high
ENSMUST00000030769	309.995	337.675	362.865	395.652	255.565	250.357	231.044	303.941	287.229	273.644	324.559	235.984	236.641	149.566	high	high	high	high
ENSMUST00000098789	271.939	252.846	174	156.631	213.275	209.077	223.42	246.311	220.064	265.2	252.883	216.648	229.494	176.025	high	high	high	high
ENSMUST00000116514	156.98	145.069	141.648	132.186	218.014	222.301	208.307	140.129	132.75	166.688	139.313	201.707	205.354	214.978	high	high	high	high
ENSMUST00000026410	346.861	347.51	251.819	274.331	237.883	240.171	276.654	349.335	297.501	331.5	326.073	282.712	254.746	84.5214	high	high	high	high
ENSMUST00000028663	521.283	458.566	344.503	307.83	256.476	247.676	218.927	496.174	419.188	357.145	445.196	300.29	247.441	74.2319	high	high	high	high
ENSMUST00000033695	108.617	94.2539	134.653	139.429	252.284	225.696	233.222	134.997	101.142	98.5119	97.9229	230.857	232.829	157.651	high	high	high	high
ENSMUST00000036578	182.35	158.593	127.658	90.5382	174.995	186.383	192.65	165.786	132.354	152.615	158.494	175.926	183.119	262.016	high	high	high	high
ENSMUST00000058060	144.691	149.987	139.9	165.685	169.344	183.166	132.473	157.892	128.008	134.477	157.484	152.049	163.902	305.012	high	high	high	high
ENSMUST00000099739	213.667	214.325	317.397	238.115	235.331	195.139	268.893	277.494	230.336	188.267	193.827	250.632	239.659	130.457	high	high	high	high
ENSMUST00000023048	56.6871	45.078	33.2262	56.1337	169.891	165.832	166.646	67.1039	49.386	61.609	61.5804	156.737	192.33	270.836	high	high	high	high
ENSMUST00000117506	77.697	86.0579	94.4323	47.9852	269.237	238.92	240.03	56.841	80.993	76.6203	76.2184	212.107	250.141	157.651	high	high	high	high
ENSMUST00000145596	133.591	151.216	181.87	93.2543	233.873	199.249	227.232	125.524	119.317	111.96	125.685	221.189	224.094	174.188	high	high	high	high
ENSMUST00000065112	55.4978	72.1248	50.7136	47.0799	158.771	171.551	231.861	49.3411	50.1762	53.1651	71.1708	150.877	183.913	284.433	high	high	high	high
ENSMUST00000029769	77.697	61.0602	88.3117	90.5382	221.113	220.335	200.819	67.8934	73.8814	78.184	65.1137	206.101	224.888	188.152	high	high	high	high
ENSMUST00000029696	275.903	293.417	236.081	228.156	209.811	215.868	242.889	287.363	293.155	272.706	295.283	249.314	248.394	121.27	high	high	high	high
ENSMUST00000179549	88.4001	95.8931	97.9298	101.403	146.011	161.365	109.6	78.5511	67.56	77.5585	78.2374	124.803	133.249	360.87	high	high	high	high
ENSMUST00000018002	150.637	169.247	154.764	198.279	186.296	178.877	165.693	148.813	139.071	153.866	162.532	187.058	172.001	259.444	high	high	high	high
ENSMUST00000098457	219.613	197.523	187.99	105.024	217.285	206.754	229.41	196.97	176.209	176.07	195.341	233.933	233.147	151.036	high	high	high	high
ENSMUST00000031740	195.432	204.49	160.885	118.605	169.161	173.159	165.693	209.206	181.74	186.391	207.96	177.977	171.525	268.264	high	high	high	high
ENSMUST00000023270	28.9382	25.8174	53.3367	9.9592	174.812	172.265	194.284	34.7362	33.9776	37.2156	29.7807	156.151	195.03	266.426	high	high	high	high
ENSMUST00000029740	200.585	193.835	207.226	282.479	248.456	229.27	234.039	219.075	193.198	183.889	180.198	245.505	238.706	132.294	high	high	high	high
ENSMUST00000121334	212.081	233.996	186.241	205.522	268.872	258.398	221.377	215.522	163.961	175.132	191.303	245.945	245.058	125.312	high	high	high	high
ENSMUST00000023670	134.78	111.466	146.895	142.145	256.659	244.102	257.593	110.524	182.926	262.073	242.284	239.499	250.299	126.415	high	high	high	high
ENSMUST00000076264	174.025	189.327	147.769	155.726	213.457	205.325	213.345	203.68	161.986	169.503	162.532	221.042	212.977	181.537	high	high	high	high
ENSMUST00000020831	77.697	86.4677	74.3217	93.2543	163.693	169.049	131.383	80.9194	75.8569	75.3694	77.2279	141.942	153.42	319.711	high	high	high	high
ENSMUST00000041587	432.883	436.847	351.498	341.329	201.244	204.788	218.11	418.413	387.186	384.04	418.444	206.834	196.142	212.039	high	high	high	high
ENSMUST00000044260	30.5238	32.3742	38.4724	27.1615	180.828	189.063	174.951	25.6574	30.8169	38.7793	35.8378	179.295	190.583	245.112	high	high	high	high
ENSMUST00000070117	311.184	303.252	280.674	277.047	218.926	220.335	234.448	281.442	271.425	250.189	301.845	230.271	199.477	184.845	high	high	high	high
ENSMUST00000044556	186.314	168.428	115.417	118.605	225.852	206.397	216.068	171.707	150.924	172.005	201.398	224.705	200.907	188.887	high	high	high	high
ENSMUST00000032936	262.425	293.417	288.543	329.559	242.076	241.064	205.04	246.706	239.423	267.702	264.493	215.33	218.536	180.435	high	high	high	high
ENSMUST00000022322	224.37	221.702	249.196	296.965	233.691	212.651	213.617	213.943	199.914	236.428	219.065	214.597	217.741	181.537	high	high	high	high
ENSMUST00000174462	106.635	94.2539	117.166	102.308	260.304	225.16	243.434	118.813	97.5867	113.523	82.2755	210.935	239.023	163.163	high	high	high	high
ENSMUST00000038739	300.085	312.267	235.206	302.398	251.19	218.727	228.049	276.705	264.314	265.826	274.083	225.144	225.682	162.061	high	high	high	high
ENSMUST00000040791	208.91	218.423	240.453	257.128	204.89	193.888	233.222	264.074	211.372	197.962	203.922	246.677	219.647	146.259	high	high	high	high
ENSMUST00000076034	262.029	255.305	252.694	301.492	245.539	232.308	196.054	227.364	171.073	183.576	191.303	212.839	191.219	208.364	high	high	high	high
ENSMUST00000031402	431.297	429.47	454.674	669.077	310.251	271.8	290.677	401.439	377.309	359.959	406.834	268.649	277.616	65.4122	high	high	high	high
ENSMUST00000025404	153.808	177.443	158.261	186.509	203.249	222.122	194.556	181.97	155.27	186.703	218.56	206.248	221.394	183.742	high	high	high	high
ENSMUST00000018337	64.2189	54.0936	74.3217	78.7682	214.915	195.139	258.818	64.7356	60.8435	62.8599	74.7041	193.357	227.271	190.724	high	high	high	high
ENSMUST00000166984	35.6772	29.9154	65.578	33.4991	179.369	161.007	166.782	34.7362	40.6941	44.0958	35.333	147.801	194.871	268.631	high	high	high	high
ENSMUST00000034163	220.802	229.898	191.488	227.251	202.338	212.651	203.406	208.022	211.767	219.541	236.226	224.851	209.8	176.025	high	high	high	high
ENSMUST00000043584	526.833	562.245	1024.77	1064.73	234.602	225.518	174.815	545.91	507.293	434.39	650.128	187.205	201.701	221.593	high	high	high	high
ENSMUST00000043767	205.738	204.9	194.111	170.212	260.851	275.732	231.861	178.417	175.814	183.263	154.456	247.995	256.97	105.468	high	high	high	high
ENSMUST00000045243	97.1212	113.924	115.417	63.3767	259.575	224.803	261.677	91.1824	92.0555	95.3845	79.2469	221.628	260.464	128.252	high	high	high	high
ENSMUST00000021314	250.533	238.913	184.493	193.752	201.608	185.31	230.227	261.311	201.89	236.741	237.236	210.056	190.424	209.834	high	high	high	high
ENSMUST00000032386	90.7786	74.1738	57.7086	98.6866	215.28	191.386	167.463	89.2087	73.0913	79.7477	74.1993	165.379	197.413	247.317	high	high	high	high
ENSMUST00000037408	151.43	159.002	153.015	197.373	179.369	183.881	183.664	202.496	140.256	182.638	177.675	203.465	191.536	214.978	high	high	high	high
ENSMUST00000057725	78.8862	83.1894	64.7036	61.566	216.556	224.088	190.608	81.7089	75.8569	100.388	65.6185	209.324	198.048	201.749	high	high	high	high
ENSMUST00000026262	187.9	172.935	172.251	180.171	172.807	179.592	161.608	169.733	220.854	242.058	183.227	181.199	185.66	242.172	high	high	high	high
ENSMUST00000057288	85.6252	71.3052	72.573	105.93	155.308	166.726	124.44	69.4723	73.0913	86.6279	78.2374	133.153	148.655	325.959	high	high	high	high
ENSMUST00000077853	440.415	413.078	532.493	513.352	233.144	196.211	248.199	410.913	408.521	349.013	415.415	207.713	201.224	198.809	high	high	high	high
ENSMUST00000029663	208.117	221.702	219.468	267.088	227.128	244.638	188.293	182.76	182.531	169.816	180.703	206.101	217.106	184.11	high	high	high	high
ENSMUST00000037709	151.43	146.299	135.528	117.7	246.268	236.061	204.359	124.34	123.267	124.469	115.085	234.665	246.964	125.68	high	high	high	high
ENSMUST00000031727	237.848	165.559	73.4473	69.7144	206.712	181.736	176.993	204.47	200.705	187.329	223.608	149.852	177.242	280.023	high	high	high	high
ENSMUST00000034697	288.985	228.668	190.613	157.536	199.968	176.912	172.772	316.178	312.91	299.288	284.683	236.863	203.289	166.838	high	high	high	high
ENSMUST00000077290	213.27	220.882	211.598	191.941	207.442	204.61	231.589	185.917	217.298	232.05	226.131	215.476	208.848	182.64	high	high	high	high
ENSMUST00000120129	99.1033	99.5813	104.925	58.8498	197.416	185.132	197.552	96.3139	89.6849	97.2609	100.951	191.453	198.048	217.183	high	high	high	high
ENSMUST00000037480	126.059	145.479	114.543	86.9167	199.056	213.545	238.532	145.26	112.205	132.913	144.865	210.349	222.824	173.453	high	high	high	high
ENSMUST00000060389	67.3902	81.5502	59.4574	92.349	203.978	196.032	205.993	76.5774	75.4618	91.0062	84.2945	192.185	216.947	197.339	high	high	high	high
ENSMUST00000177974	130.023	136.054	158.261	117.7	234.784	224.088	185.707	119.208	107.859	104.141	118.618	197.605	212.024	196.237	high	high	high	high
ENSMUST00000023525	137.952	140.561	124.161	145.766	228.951	228.377	222.467	142.892	128.404	139.48	145.875	228.513	240.135	137.072	high	high	high	high
ENSMUST00000099972	94.7427	84.0089	118.04	49.796	181.192	177.984	148.266	93.9455	83.3635	77.5585	73.6946	167.43	162.631	275.613	high	high	high	high
ENSMUST00000170430	224.766	213.915	395.217	330.464	214.004	171.729	201.908	269.205	214.533	201.715	215.531	208.738	209.642	187.05	high	high	high	high
ENSMUST00000018990	108.617	89.3363	114.543	119.51	199.421	155.646	222.331	112.498	113.39	105.392	92.3706	143.846	188.042	273.041	high	high	high	high
ENSMUST00000085299	203.756	190.147	215.97	151.199	236.425	195.496	282.372	206.049	184.506	184.514	180.198	193.65	211.071	199.912	high	high	high	high
ENSMUST00000040434	141.916	145.479	120.663	139.429	194.317	226.054	181.622	104.208	107.859	117.901	107.513	170.652	172.954	260.546	high	high	high	high
ENSMUST00000027743	226.748	226.619	173.126	163.874	224.576	223.194	212.936	203.285	171.863	192.333	210.989	238.474	218.536	146.994	high	high	high	high
ENSMUST00000023803	151.033	119.252	123.287	173.833	208.9	223.552	184.209	73.0249	323.577	314.612	269.036	178.855	200.907	224.166	high	high	high	high
ENSMUST00000046389	190.675	185.229	155.638	178.36	212.363	218.012	186.387	176.839	164.752	152.302	163.541	195.701	192.807	215.346	high	high	high	high
ENSMUST00000031709	427.73	428.241	384.724	513.352	227.311	206.575	236.762	337.888	402.99	373.407	358.883	222.507	223.618	157.283	high	high	high	high
ENSMUST00000007708	253.308	255.305	313.9	305.114	210.176	204.252	167.599	246.706	225.595	216.726	254.398	176.072	185.501	241.805	high	high	high	high
ENSMUST00000058659	135.97	125.809	146.895	144.861	251.737	255.896	194.284	105.393	193.198	256.756	272.064	197.312	214.406	191.459	high	high	high	high
ENSMUST00000088823	184.332	171.296	115.417	132.186	220.931	226.947	208.988	153.944	173.048	193.271	241.779	206.834	207.418	188.52	high	high	high	high
ENSMUST00000033184	284.228	306.94	278.051	241.737	240.253	224.803	268.485	271.179	239.028	245.185	243.798	228.513	246.329	127.885	high	high	high	high
ENSMUST00000034537	411.08	364.722	352.372	420.097	230.774	214.438	176.176	405.781	296.316	255.505	312.445	262.497	212.5	127.517	high	high	high	high
ENSMUST00000091514	170.458	160.642	162.633	196.468	178.823	189.063	171.683	164.207	142.627	157.619	167.075	202.146	176.766	223.431	high	high	high	high
ENSMUST00000023707	317.923	334.806	520.252	584.877	193.588	194.424	152.078	331.178	328.713	282.401	395.225	159.08	171.525	271.571	high	high	high	high
ENSMUST00000056433	100.689	100.811	74.3217	72.4306	203.249	191.386	188.702	103.419	104.303	96.6354	98.9324	195.115	185.66	221.226	high	high	high	high
ENSMUST00000134585	96.7248	93.4343	116.292	129.47	214.368	214.438	182.847	95.5244	107.069	109.458	105.999	184.275	206.306	210.936	high	high	high	high
ENSMUST00000080536	195.035	252.027	290.292	348.572	200.515	199.428	248.471	258.153	251.671	239.243	272.569	225.29	228.065	148.096	high	high	high	high
ENSMUST00000019977	141.123	159.002	146.02	155.726	214.551	220.157	242.344	146.444	103.118	115.4	150.922	222.361	230.129	148.464	high	high	high	high
ENSMUST00000015394	38.8485	22.1292	50.7136	64.2821	135.256	164.224	110.416	17.7628	251.276	187.016	23.2188	107.958	143.096	349.845	high	high	high	high
ENSMUST00000074556	96.3284	122.94	83.0654	106.835	205.072	229.091	192.922	74.9985	96.7965	103.828	108.018	176.512	202.177	221.961	high	high	high	high
ENSMUST00000061875	122.888	135.644	125.91	113.173	199.056	224.267	211.166	119.998	121.292	139.793	136.284	195.408	212.183	192.929	high	high	high	high
ENSMUST00000040241	73.7328	78.2718	74.3217	51.6068	223.665	188.527	187.477	75.788	71.5109	75.6821	69.1518	211.082	223.618	165.735	high	high	high	high
ENSMUST00000000759	195.432	223.341	173.126	220.008	224.212	211.579	170.05	199.338	195.568	208.282	209.474	180.174	198.524	221.593	high	high	high	high
ENSMUST00000144326	195.828	183.59	160.01	141.24	238.612	207.112	224.1	219.469	189.642	179.823	199.884	225.29	224.888	149.934	high	high	high	high
ENSMUST00000046633	101.878	83.5992	113.668	127.659	187.39	158.327	231.589	91.1824	86.5242	106.643	90.8563	162.449	214.883	222.696	high	high	high	high
ENSMUST00000016115	241.019	265.55	241.327	206.427	211.999	213.545	227.504	235.258	203.47	213.599	237.236	215.916	202.177	181.905	high	high	high	high
ENSMUST00000081728	112.185	118.842	65.578	90.5382	186.661	202.465	185.298	120.787	109.834	126.658	151.427	187.498	217.741	194.399	high	high	high	high
ENSMUST00000029445	46.3803	43.8486	41.9699	59.7552	191.218	170.836	186.251	37.4993	81.3881	90.3807	58.5519	138.719	180.895	280.023	high	high	high	high
ENSMUST00000026093	291.76	262.682	307.779	274.331	236.425	220.514	228.185	294.073	258.783	269.266	269.036	237.595	222.506	139.277	high	high	high	high
ENSMUST00000038128	109.806	112.695	91.8092	80.579	210.358	216.761	171.683	95.5244	96.0064	111.96	107.513	181.932	186.772	230.413	high	high	high	high
ENSMUST00000041683	179.179	159.412	130.282	139.429	217.65	193.352	202.725	153.944	168.703	157.619	129.723	200.095	195.983	202.851	high	high	high	high
ENSMUST00000169020	239.433	236.864	205.478	134.902	197.234	174.767	242.344	246.706	217.693	224.232	203.922	223.533	202.177	173.085	high	high	high	high
ENSMUST00000053498	236.659	231.537	159.136	154.82	181.192	190.314	211.303	241.574	210.582	257.695	237.236	200.681	187.883	210.201	high	high	high	high
ENSMUST00000025695	596.205	620.847	633.046	691.712	273.794	258.934	275.292	612.225	503.342	488.181	622.366	278.464	250.776	69.4546	high	high	high	high
ENSMUST00000028815	95.932	70.8954	63.8292	54.3229	229.498	190.314	205.312	79.3405	108.649	113.836	108.018	162.156	185.819	250.624	high	high	high	high
ENSMUST00000089011	216.838	194.655	170.503	212.765	243.534	204.967	216.612	180.391	224.805	251.753	189.284	235.544	218.536	144.421	high	high	high	high
ENSMUST00000122255	239.83	197.933	126.784	96.8759	243.899	230.521	241.664	241.574	205.446	227.359	259.445	256.345	234.417	107.305	high	high	high	high
ENSMUST00000109315	324.662	324.561	343.629	312.357	255.747	216.761	288.09	266.837	246.535	290.532	287.207	241.111	248.87	108.04	high	high	high	high
ENSMUST00000127492	320.302	347.51	222.091	258.939	255.747	234.989	298.846	280.258	239.818	293.034	358.883	264.108	257.446	76.4368	high	high	high	high
ENSMUST00000035301	331.401	347.51	490.523	555.905	198.145	202.465	152.214	349.335	298.686	296.787	355.349	159.959	174.86	263.119	high	high	high	high
ENSMUST00000025137	153.015	164.33	267.558	209.143	212.546	207.469	203.134	175.26	150.133	138.542	138.304	206.248	220.441	171.248	high	high	high	high
ENSMUST00000043616	164.115	118.842	165.256	167.496	188.666	169.227	201.091	181.181	159.22	153.553	128.713	194.529	196.142	207.261	high	high	high	high
ENSMUST00000078717	58.2727	58.1916	71.6986	64.2821	285.278	226.947	285.367	51.3148	65.5846	58.1689	44.9234	202.439	272.852	122.372	high	high	high	high
ENSMUST00000022815	150.241	163.51	154.764	191.036	175.541	198.177	162.425	135.787	121.292	161.685	154.961	180.613	172.319	244.377	high	high	high	high
ENSMUST00000027247	103.464	101.221	107.548	125.848	183.015	210.328	168.96	105.787	117.736	117.901	107.513	175.193	180.578	241.437	high	high	high	high
ENSMUST00000041826	149.448	159.412	208.101	233.589	220.566	202.108	230.363	153.55	139.861	167.314	144.865	217.673	214.565	164.633	high	high	high	high
ENSMUST00000034547	232.298	234.815	211.598	307.83	258.664	246.247	231.452	219.469	216.903	198.275	189.789	246.677	235.529	114.655	high	high	high	high
ENSMUST00000016452	195.828	180.722	257.94	274.331	258.846	270.728	227.64	186.312	170.678	171.692	178.684	240.671	259.67	96.2809	high	high	high	high
ENSMUST00000038228	56.2907	53.6838	74.3217	62.4714	245.175	204.967	221.105	72.6301	62.4239	69.1147	56.0281	185.447	230.129	180.435	high	high	high	high
ENSMUST00000090433	211.288	215.145	200.231	129.47	299.861	288.955	260.044	222.232	171.863	189.205	228.655	273.63	295.404	26.8264	high	high	high	high
ENSMUST00000078459	231.109	224.98	279.799	296.06	253.195	241.243	213.345	252.627	220.064	199.213	267.017	261.472	265.864	68.3521	high	high	high	high
ENSMUST00000023104	227.541	231.947	172.251	215.481	226.399	216.404	215.115	189.47	181.74	163.561	171.113	215.183	198.842	181.537	high	high	high	high
ENSMUST00000067563	94.3463	102.04	69.9498	104.119	149.475	169.764	140.914	116.05	102.328	99.4501	110.542	166.111	166.284	263.119	high	high	high	high
ENSMUST00000072961	343.69	347.51	327.015	345.856	239.706	213.187	259.227	336.704	275.376	290.219	309.921	246.823	232.512	116.125	high	high	high	high
ENSMUST00000039286	110.599	120.071	160.01	232.683	203.067	202.644	187.749	114.077	113.785	130.724	118.618	194.09	204.242	196.237	high	high	high	high
ENSMUST00000022460	87.2109	97.9421	101.427	84.2005	205.801	210.507	166.918	121.971	106.279	103.516	75.7136	205.662	179.307	209.466	high	high	high	high
ENSMUST00000030797	65.4082	50.8152	63.8292	85.1059	212.546	211.758	200.547	64.3408	74.2765	84.7515	85.8088	151.61	209.165	233.353	high	high	high	high
ENSMUST00000044492	273.525	315.956	417.076	296.965	219.29	201.215	206.401	262.1	261.943	220.792	214.017	200.681	207.101	186.315	high	high	high	high
ENSMUST00000162726	175.215	177.853	199.357	184.698	214.186	233.023	178.218	149.997	136.305	166.376	157.989	194.236	193.601	205.424	high	high	high	high
ENSMUST00000070173	78.4898	67.2072	53.3367	62.4714	133.251	143.674	127.707	71.4459	86.1292	77.5585	81.7707	114.55	113.874	364.177	high	high	high	high
ENSMUST00000094216	173.629	157.363	124.161	142.145	180.281	205.503	208.58	182.76	139.861	173.569	192.817	211.082	209.642	171.248	high	high	high	high
ENSMUST00000024042	133.988	136.463	105.799	134.902	218.014	230.521	194.692	116.84	112.205	126.658	126.189	196.287	207.101	188.152	high	high	high	high
ENSMUST00000025236	59.462	56.1426	104.05	57.9444	170.255	195.317	220.152	73.4196	72.6962	86.9406	86.8183	167.283	200.43	223.431	high	high	high	high
ENSMUST00000090413	154.601	173.755	153.89	192.846	211.27	237.312	227.096	138.155	126.033	160.746	150.418	214.597	220.124	156.181	high	high	high	high
ENSMUST00000036540	62.6333	44.2584	38.4724	44.3637	213.457	212.473	187.613	57.6304	58.473	71.3038	55.5233	172.41	209.165	209.099	high	high	high	high
ENSMUST00000031621	345.672	315.136	389.97	396.557	237.883	222.837	236.218	331.178	290.39	281.15	323.549	233.494	216.312	140.747	high	high	high	high
ENSMUST00000033012	499.084	549.951	535.116	660.929	247.544	216.046	299.254	503.674	443.684	396.237	507.786	269.528	248.235	72.7619	high	high	high	high
ENSMUST00000062356	179.972	172.935	209.849	381.166	213.275	215.153	174.406	134.208	333.849	320.554	195.341	198.191	208.053	184.11	high	high	high	high
ENSMUST00000028135	181.161	157.363	143.397	147.577	267.778	266.082	219.063	162.234	175.024	168.877	162.532	240.525	234.1	115.39	high	high	high	high
ENSMUST00000021329	154.205	145.069	125.91	103.214	224.394	230.521	219.88	153.944	139.071	146.048	169.094	200.242	231.241	158.018	high	high	high	high
ENSMUST00000081154	19.8207	18.0312	27.9799	37.1207	221.842	191.029	191.289	19.7364	26.866	36.2774	27.7617	172.557	217.741	198.809	high	high	high	high
ENSMUST00000119430	52.3265	52.0446	52.4624	37.1207	205.436	179.949	206.537	58.4199	45.4351	54.1033	50.4757	182.81	204.242	201.749	high	high	high	high
ENSMUST00000100487	172.44	147.118	139.025	145.766	225.67	226.411	225.598	142.497	127.218	156.055	137.294	216.648	212.5	159.121	high	high	high	high
ENSMUST00000022867	359.547	386.031	411.83	362.153	234.967	208.541	260.044	357.624	318.441	310.547	386.139	254.001	235.529	98.4858	high	high	high	high
ENSMUST00000114155	63.8225	73.764	43.7186	25.3507	202.702	180.307	198.368	53.2884	62.819	60.6708	56.5328	175.486	196.142	215.713	high	high	high	high
ENSMUST00000104955	232.298	206.949	230.834	205.522	247.544	208.005	248.335	215.127	182.136	183.576	180.198	240.818	233.306	113.185	high	high	high	high
ENSMUST00000029087	99.8961	113.515	100.553	85.1059	171.167	197.462	157.388	103.024	108.649	121.654	96.4087	163.768	169.143	254.299	high	high	high	high
ENSMUST00000020522	230.316	227.849	226.463	162.969	231.686	214.438	222.603	205.259	173.444	177.009	187.265	217.527	200.271	169.41	high	high	high	high
ENSMUST00000022766	127.249	123.35	107.548	106.835	184.473	220.514	202.997	134.208	108.254	134.789	140.323	185.594	210.118	191.459	high	high	high	high
ENSMUST00000069557	14.6673	13.9332	16.6131	26.2561	163.693	165.654	140.778	18.947	29.2365	30.6481	23.2188	127.879	150.561	308.687	high	high	high	high
ENSMUST00000000312	28.5417	20.0802	13.99	16.2969	182.833	204.788	133.017	5.92093	64.7944	85.6897	69.1518	126.268	176.29	284.433	high	high	high	high
ENSMUST00000058754	183.539	156.544	213.347	200.089	268.507	229.628	264.264	162.628	160.011	170.441	171.113	254.001	262.846	69.822	high	high	high	high
ENSMUST00000179395	42.0198	30.3252	34.9749	28.9722	175.724	181.736	151.533	41.8413	32.0021	40.9684	30.2854	170.652	182.166	233.72	high	high	high	high
ENSMUST00000000080	113.771	105.319	96.181	85.1059	170.073	182.451	208.852	82.8931	87.7095	115.087	90.3516	151.317	195.348	239.232	high	high	high	high
ENSMUST00000142029	200.585	205.719	208.975	225.44	203.796	206.039	157.115	201.707	169.098	163.248	194.836	173.289	172.796	239.6	high	high	high	high
ENSMUST00000114694	29.731	18.0312	10.4925	27.1615	174.995	176.733	183.12	26.8416	23.7053	22.8297	27.2569	159.373	209.483	216.816	high	high	high	high
ENSMUST00000003433	371.439	314.316	249.196	260.75	239.342	176.733	231.725	294.073	363.876	379.974	306.388	185.594	204.559	195.502	high	high	high	high
ENSMUST00000100729	76.5077	81.96	48.9649	56.1337	151.115	163.688	125.393	70.6565	70.3256	78.4968	67.6375	131.981	144.208	309.422	high	high	high	high
ENSMUST00000000001	67.7866	55.7328	85.6885	90.5382	179.734	166.904	189.927	73.8143	111.415	121.029	118.113	148.68	188.995	247.317	high	high	high	high
ENSMUST00000000384	403.549	378.655	255.317	272.52	194.682	187.633	213.481	480.78	364.271	371.843	414.406	214.744	196.142	173.82	high	high	high	high
ENSMUST00000025563	487.984	502.824	840.272	894.517	224.03	213.723	189.655	492.227	480.032	419.066	577.947	197.605	198.524	188.52	high	high	high	high
ENSMUST00000112160	210.892	208.998	222.965	234.494	190.854	201.572	158.613	208.812	175.814	194.209	201.903	169.041	186.613	228.943	high	high	high	high
ENSMUST00000066070	256.479	277.434	331.387	392.936	201.062	207.469	162.153	253.416	251.276	237.679	287.712	171.531	180.419	232.618	high	high	high	high
ENSMUST00000189137	92.7607	98.3519	123.287	96.8759	199.786	184.059	184.073	104.208	85.7341	91.0062	90.8563	188.23	207.418	188.887	high	high	high	high
ENSMUST00000046983	485.606	531.92	531.619	516.068	211.27	201.751	198.232	492.622	408.126	401.866	495.167	198.045	182.484	203.586	high	high	high	high
ENSMUST00000021207	80.8683	93.4343	90.0604	56.1337	191.036	208.541	204.904	115.261	117.341	173.881	141.332	185.887	190.424	207.629	high	high	high	high
ENSMUST00000008573	183.936	171.706	153.015	153.915	209.994	206.218	216.068	174.865	132.75	171.067	180.198	215.33	216.471	152.139	high	high	high	high
ENSMUST00000030702	103.067	93.4343	94.4323	115.889	149.475	173.338	122.125	103.814	101.538	105.079	98.4277	139.452	149.29	295.09	high	high	high	high
ENSMUST00000030110	45.9839	44.6682	55.0855	32.5937	219.837	191.386	223.284	45.7886	53.7319	50.3505	55.5233	174.9	206.306	202.484	high	high	high	high
ENSMUST00000048155	55.4978	58.1916	97.9298	70.6198	191.583	199.07	158.068	61.5777	66.7698	56.918	45.4282	162.303	188.36	232.985	high	high	high	high
ENSMUST00000022609	211.685	218.423	160.885	211.859	221.66	197.641	211.03	216.311	196.359	194.209	176.16	227.634	210.277	145.524	high	high	high	high
ENSMUST00000023210	386.899	430.29	483.528	554.094	255.93	246.961	227.913	388.808	365.456	353.392	409.863	241.55	230.606	110.98	high	high	high	high
ENSMUST00000034740	245.776	247.109	266.684	294.249	273.429	216.94	258.274	258.942	351.628	367.465	286.702	241.99	251.729	89.2987	high	high	high	high
ENSMUST00000041048	592.638	536.838	518.503	495.244	207.077	201.036	219.88	611.04	498.206	488.806	576.433	223.386	217.741	141.114	high	high	high	high
ENSMUST00000102636	265.2	263.911	351.498	329.559	216.191	226.768	216.068	270.389	249.696	262.698	296.797	213.425	224.888	143.686	high	high	high	high
ENSMUST00000097590	342.897	357.755	360.242	333.181	224.212	203.002	226.143	340.256	310.144	303.354	335.664	232.175	228.065	121.637	high	high	high	high
ENSMUST00000138361	723.057	722.067	1203.14	1030.32	226.946	197.104	223.692	734.196	691.799	608.584	883.83	203.904	204.083	173.82	high	high	high	high
ENSMUST00000109514	114.96	86.0579	90.9348	91.4436	217.467	196.211	189.246	94.3402	79.8077	80.9986	83.285	175.486	181.689	224.533	high	high	high	high
ENSMUST00000053386	211.288	222.111	241.327	251.696	208.171	204.431	237.579	262.495	194.383	182.951	192.313	255.905	243.788	81.949	high	high	high	high
ENSMUST00000041231	333.383	356.526	422.322	392.936	191.765	148.141	213.209	371.835	334.639	308.67	376.549	202.732	191.06	187.785	high	high	high	high
ENSMUST00000058488	115.753	149.987	131.156	159.347	178.458	191.743	154.665	119.603	116.551	157.619	136.284	171.824	181.531	228.208	high	high	high	high
ENSMUST00000164107	207.324	185.229	111.92	96.8759	194.135	181.022	220.152	196.575	171.468	218.915	193.827	193.943	193.601	193.664	high	high	high	high
ENSMUST00000061833	342.897	308.989	240.453	220.008	228.769	183.881	228.866	321.704	263.129	233.927	291.75	244.48	237.276	99.2208	high	high	high	high
ENSMUST00000041723	144.691	127.858	167.88	126.753	178.64	158.684	191.561	140.918	116.946	110.083	118.618	181.785	191.536	207.629	high	high	high	high
ENSMUST00000151937	78.8862	74.5836	79.5679	59.7552	206.166	194.245	198.096	91.1824	67.9551	80.0604	83.7897	200.388	219.33	160.958	high	high	high	high
ENSMUST00000068700	747.239	797.88	622.554	639.2	256.476	210.149	275.565	846.694	678.761	595.137	674.356	271.579	229.335	79.7441	high	high	high	high
ENSMUST00000025120	431.297	462.254	413.578	426.435	247.727	233.559	254.325	412.097	340.566	355.581	370.997	244.187	225.047	111.348	high	high	high	high
ENSMUST00000024627	31.713	42.2094	59.4574	32.5937	190.671	181.915	209.941	41.0518	41.0891	45.034	45.4282	157.03	218.059	205.424	high	high	high	high
ENSMUST00000162031	219.216	264.731	261.437	334.991	208.718	221.586	220.969	234.864	208.606	215.475	233.198	213.718	211.865	154.711	high	high	high	high
ENSMUST00000003642	321.887	353.247	246.573	287.911	226.035	214.796	228.457	333.941	269.45	265.513	276.607	241.55	223.459	115.023	high	high	high	high
ENSMUST00000026357	218.424	193.016	162.633	161.158	253.56	237.49	189.655	228.153	152.109	152.615	187.77	242.282	217.9	119.8	high	high	high	high
ENSMUST00000034879	189.882	185.639	164.382	162.969	197.78	174.946	210.349	172.102	170.678	179.198	201.903	206.834	198.524	174.555	high	high	high	high
ENSMUST00000071792	106.635	125.399	106.673	109.551	177.182	193.888	146.36	94.3402	97.5867	112.898	108.018	152.342	159.296	268.264	high	high	high	high
ENSMUST00000100986	100.293	90.9755	136.402	96.8759	186.843	163.33	184.617	121.971	132.354	119.465	103.475	168.895	195.824	214.978	high	high	high	high
ENSMUST00000035840	499.084	514.708	447.679	386.598	218.743	195.854	255.551	516.7	432.226	442.522	587.538	241.404	211.706	126.415	high	high	high	high
ENSMUST00000040992	213.27	222.521	166.131	99.592	218.561	200.678	233.631	251.837	249.3	260.822	241.274	213.132	212.977	153.241	high	high	high	high
ENSMUST00000117399	171.647	171.706	139.025	124.943	195.228	178.52	227.913	167.76	221.249	298.976	280.14	172.117	204.559	202.484	high	high	high	high
ENSMUST00000054952	76.9041	78.2718	85.6885	93.2543	139.449	162.973	119.811	80.13	58.8681	72.242	77.2279	128.319	139.761	310.892	high	high	high	high
ENSMUST00000000939	179.972	168.018	146.02	121.321	203.978	200.142	187.885	175.26	143.417	158.87	163.541	181.346	183.595	213.876	high	high	high	high
ENSMUST00000174552	111.788	102.04	146.895	108.646	228.222	208.184	240.983	103.024	106.279	106.018	110.037	235.837	233.465	109.51	high	high	high	high
ENSMUST00000111945	55.4978	47.127	66.4523	66.0929	169.526	176.018	172.5	58.0252	65.5846	54.1033	53.5043	149.119	180.737	248.787	high	high	high	high
ENSMUST00000023761	201.774	200.392	221.216	247.169	167.703	177.805	133.562	206.443	178.975	178.26	200.389	152.049	149.29	277.083	high	high	high	high
ENSMUST00000074628	281.057	296.695	375.98	296.06	203.796	203.359	156.435	275.916	254.437	224.857	316.988	168.309	183.436	226.003	high	high	high	high
ENSMUST00000046461	404.738	340.134	326.141	372.112	251.008	241.779	248.607	403.808	279.722	323.995	346.768	252.976	233.941	90.7687	high	high	high	high
ENSMUST00000038091	127.645	124.989	117.166	105.93	218.926	229.628	255.006	121.971	131.959	140.106	123.666	222.361	246.329	108.775	high	high	high	high
ENSMUST00000103178	210.099	170.886	195.86	156.631	218.926	208.184	193.059	197.759	150.924	186.703	185.751	207.273	207.895	162.061	high	high	high	high
ENSMUST00000050772	735.743	742.967	759.83	730.643	246.633	197.283	293.809	704.197	655.846	617.341	752.089	309.225	245.535	22.4166	high	high	high	high
ENSMUST00000051589	106.239	101.63	143.397	133.997	210.358	199.07	198.232	114.077	89.2899	101.014	96.9134	216.062	221.077	140.012	high	high	high	high
ENSMUST00000042754	97.5176	109.007	98.8041	67.9036	128.329	150.643	90.4026	112.103	68.3502	92.8826	103.475	121.727	127.214	327.796	high	high	high	high
ENSMUST00000078214	133.988	130.726	141.648	180.171	199.239	210.864	180.941	127.892	113.785	140.106	114.075	177.098	189.313	210.201	high	high	high	high
ENSMUST00000022529	160.547	167.198	151.267	182.887	165.151	159.756	157.115	152.365	196.359	267.077	213.008	158.348	148.655	268.999	high	high	high	high
ENSMUST00000034533	13.478	11.8842	27.9799	25.3507	179.187	198.713	204.087	15.3944	53.3369	122.905	149.408	161.424	187.725	226.738	high	high	high	high
ENSMUST00000022032	102.671	129.907	106.673	138.523	182.833	210.507	146.496	116.05	105.884	87.2534	92.8754	188.67	177.084	209.834	high	high	high	high
ENSMUST00000038287	158.962	170.067	150.392	143.956	225.306	183.523	173.045	162.234	143.022	129.785	139.313	170.213	195.824	209.099	high	high	high	high
ENSMUST00000025867	288.192	296.695	203.729	199.184	223.118	216.404	239.621	236.048	233.892	259.258	257.931	225.876	211.389	137.807	high	high	high	high
ENSMUST00000029938	219.613	231.127	224.714	309.641	239.706	235.882	208.988	191.838	189.247	186.078	199.379	212.546	216.312	145.891	high	high	high	high
ENSMUST00000014892	172.44	156.953	140.774	110.457	218.379	226.59	187.749	161.839	137.095	156.681	167.075	205.662	207.577	161.326	high	high	high	high
ENSMUST00000110766	91.5714	88.9265	84.8142	38.9314	160.959	172.98	176.448	105.787	86.9193	100.701	99.4372	172.703	169.302	232.25	high	high	high	high
ENSMUST00000147218	21.4063	22.1292	26.2312	7.24306	162.235	176.018	129.613	17.7628	17.3839	27.208	26.2474	131.542	158.184	284.433	high	high	high	high
ENSMUST00000034763	130.816	134.005	132.03	153.01	182.286	199.249	158.205	131.839	129.589	138.229	122.656	171.385	176.29	226.37	high	high	high	high
ENSMUST00000039271	143.105	136.873	177.498	138.523	193.952	192.28	198.232	157.102	144.602	136.353	145.37	172.264	178.672	223.063	high	high	high	high
ENSMUST00000153183	95.932	98.7617	75.1961	81.4844	178.093	176.197	190.608	91.5771	79.8077	92.8826	90.8563	183.103	180.419	210.201	high	high	high	high
ENSMUST00000023116	574.403	626.584	740.594	800.358	226.582	209.435	225.054	609.856	530.998	482.552	625.394	215.037	205.354	153.241	high	high	high	high
ENSMUST00000042601	292.156	299.154	150.392	138.523	193.223	197.104	202.181	254.205	233.102	260.822	254.398	204.49	175.813	193.297	high	high	high	high
ENSMUST00000041623	113.374	96.3029	93.5579	111.362	251.919	203.18	213.345	89.9982	176.209	186.703	117.104	205.662	212.5	155.078	high	high	high	high
ENSMUST00000045372	161.34	164.74	187.116	236.305	206.166	221.407	160.519	148.813	148.553	152.928	155.97	179.588	189.313	203.954	high	high	high	high
ENSMUST00000020339	199.792	172.116	220.342	254.412	217.832	196.211	219.063	203.285	157.64	174.819	154.961	204.05	199.001	169.778	high	high	high	high
ENSMUST00000034227	331.401	358.985	307.779	395.652	241.347	224.267	165.557	357.624	284.463	261.135	293.264	256.345	212.024	104.366	high	high	high	high
ENSMUST00000025997	138.348	148.348	176.623	129.47	208.171	217.297	202.453	140.524	127.613	135.102	124.17	197.459	212.183	162.428	high	high	high	high
ENSMUST00000053252	324.662	344.232	392.593	418.286	245.539	255.181	196.598	347.756	327.923	304.605	358.378	219.285	232.512	120.167	high	high	high	high
ENSMUST00000057844	447.154	361.853	562.222	450.88	214.733	186.561	276.382	501.701	414.052	383.414	398.254	251.511	224.412	95.9134	high	high	high	high
ENSMUST00000002551	129.231	133.595	182.744	151.199	150.204	175.839	120.491	133.813	129.984	126.345	120.637	129.784	140.873	300.97	high	high	high	high
ENSMUST00000033938	217.234	229.078	295.538	357.626	199.968	204.074	177.402	237.232	214.533	203.278	216.541	195.262	197.73	178.597	high	high	high	high
ENSMUST00000054565	306.824	327.02	409.207	476.231	228.769	233.38	180.397	298.02	275.771	250.189	316.483	191.453	207.418	172.718	high	high	high	high
ENSMUST00000102758	159.754	150.397	193.236	197.373	178.64	180.485	142.003	165.786	156.85	145.422	162.027	152.342	160.408	258.709	high	high	high	high
ENSMUST00000112507	137.555	146.299	131.156	118.605	203.067	205.503	221.377	138.945	136.7	131.036	170.608	197.459	205.512	168.308	high	high	high	high
ENSMUST00000038379	338.537	293.007	245.699	207.332	216.738	196.39	229.138	304.336	308.959	285.528	346.768	213.718	225.206	132.294	high	high	high	high
ENSMUST00000069097	73.3364	79.911	92.6835	64.2821	181.921	164.76	189.11	89.9982	94.426	86.6279	75.2089	187.205	202.018	181.905	high	high	high	high
ENSMUST00000143400	90.7786	108.187	116.292	93.2543	207.988	210.149	164.195	96.7086	79.8077	85.0642	90.8563	175.34	195.824	199.544	high	high	high	high
ENSMUST00000112050	85.2288	99.1715	76.9448	100.497	188.119	216.94	152.486	83.6825	64.7944	72.8675	66.628	179.295	185.66	205.424	high	high	high	high
ENSMUST00000023829	276.3	269.238	257.94	284.29	255.747	250.714	211.439	256.179	221.249	206.406	239.76	231.882	242.2	95.9134	high	high	high	high
ENSMUST00000034429	422.18	417.996	401.337	363.058	237.519	215.153	214.162	448.807	333.059	327.435	407.844	236.277	213.136	120.535	high	high	high	high
ENSMUST00000081104	135.177	134.824	154.764	126.753	139.084	150.107	147.449	183.154	150.528	132.287	144.865	154.539	159.614	255.034	high	high	high	high
ENSMUST00000071329	273.921	305.301	309.528	318.694	215.644	222.122	189.383	281.836	261.548	250.502	229.16	206.687	196.46	164.633	high	high	high	high
ENSMUST00000022102	271.939	268.009	265.809	258.939	216.374	188.884	228.457	242.758	248.905	288.03	268.531	200.974	202.336	164.266	high	high	high	high
ENSMUST00000027867	278.678	308.579	297.287	329.559	234.238	221.944	233.631	292.099	224.41	224.232	257.426	233.933	219.647	113.92	high	high	high	high
ENSMUST00000146404	231.109	246.699	257.066	242.642	201.426	251.965	210.758	231.311	173.839	187.016	216.036	203.318	221.553	141.849	high	high	high	high
ENSMUST00000102763	204.946	197.933	222.965	242.642	218.014	208.72	173.181	224.206	169.493	184.827	192.313	197.605	190.424	178.597	high	high	high	high
ENSMUST00000170836	325.059	342.183	447.679	560.431	236.243	241.958	185.162	338.677	291.575	267.389	339.702	199.363	212.659	153.976	high	high	high	high
ENSMUST00000034905	200.585	178.263	172.251	195.562	241.529	203.18	229.683	215.917	222.83	258.007	197.865	209.031	222.03	134.867	high	high	high	high
ENSMUST00000067602	120.51	120.481	180.995	125.848	222.024	227.662	215.251	111.708	104.303	98.1991	100.447	201.56	228.7	135.234	high	high	high	high
ENSMUST00000032969	80.0754	74.9934	83.0654	63.3767	179.187	191.029	151.942	75.3932	77.4372	78.8095	74.1993	161.863	173.272	230.045	high	high	high	high
ENSMUST00000025385	287.003	298.744	262.312	347.667	248.456	225.875	237.851	280.652	232.707	221.417	221.588	233.933	233.306	97.7509	high	high	high	high
ENSMUST00000071718	82.8503	72.9444	69.9498	102.308	161.688	164.581	120.9	74.209	142.232	166.688	211.998	125.682	139.126	299.867	high	high	high	high
ENSMUST00000055688	81.6611	59.421	55.9599	72.4306	153.849	156.361	148.266	94.3402	85.339	90.068	74.1993	162.01	174.225	227.84	high	high	high	high
ENSMUST00000044195	76.1113	83.1894	100.553	52.5122	204.525	187.812	203.542	80.9194	75.0667	65.3618	82.7802	194.969	196.301	172.718	high	high	high	high
ENSMUST00000050881	190.675	202.031	196.734	233.589	182.286	188.706	162.153	165.786	167.122	169.503	170.103	167.869	166.125	229.678	high	high	high	high
ENSMUST00000102899	267.579	241.782	162.633	175.644	210.176	200.5	214.842	274.731	245.35	254.254	261.464	214.597	195.507	152.506	high	high	high	high
ENSMUST00000048263	51.5337	48.3564	96.181	57.0391	222.207	197.283	187.613	44.2096	50.5712	63.1727	53.5043	178.416	217.583	166.47	high	high	high	high
ENSMUST00000142407	93.9499	58.1916	96.181	70.6198	253.378	227.126	228.049	77.7616	67.56	80.9986	81.7707	223.826	248.394	90.0337	high	high	high	high
ENSMUST00000153128	285.417	245.88	195.86	169.306	207.077	182.094	177.946	275.916	219.669	225.795	218.56	196.726	179.148	186.315	high	high	high	high
ENSMUST00000110551	122.095	121.301	118.915	125.848	212.91	224.981	199.594	133.418	164.357	217.352	189.789	182.664	206.306	173.085	high	high	high	high
ENSMUST00000043605	327.041	321.283	290.292	267.993	185.385	172.623	224.645	364.335	279.722	253.942	342.73	231.882	199.318	130.824	high	high	high	high
ENSMUST00000026009	347.258	345.871	494.021	530.554	228.222	229.449	182.167	343.019	309.354	286.466	361.406	196.726	205.036	160.223	high	high	high	high
ENSMUST00000034093	72.5436	74.1738	79.5679	61.566	197.416	201.036	175.359	67.4987	58.473	63.4854	67.1327	189.988	200.589	171.248	high	high	high	high
ENSMUST00000020931	139.934	145.889	181.87	171.117	208.353	197.283	245.203	151.576	161.196	167.627	169.598	217.673	222.982	120.902	high	high	high	high
ENSMUST00000038039	62.2369	77.0424	83.0654	80.579	164.057	168.155	150.989	61.5777	52.5467	61.9217	62.5899	167.283	176.29	217.918	high	high	high	high
ENSMUST00000115808	108.221	91.7951	76.9448	82.3898	196.14	201.929	180.805	112.103	111.02	118.527	111.047	177.684	205.036	177.862	high	high	high	high
ENSMUST00000015901	175.611	180.312	237.829	247.169	234.967	215.689	247.246	185.128	160.801	167.001	176.665	232.761	214.883	112.818	high	high	high	high
ENSMUST00000088921	450.722	554.459	988.041	634.673	166.427	138.491	161.336	339.072	215.323	337.755	200.893	147.215	159.455	253.564	high	high	high	high
ENSMUST00000107234	109.806	119.252	124.161	116.794	207.442	216.404	196.735	109.735	101.142	100.388	108.523	186.033	198.524	175.658	high	high	high	high
ENSMUST00000038874	66.9938	68.0268	173.126	114.078	210.723	177.626	203.542	88.4193	95.2162	62.8599	57.5423	193.504	209.324	157.283	high	high	high	high
ENSMUST00000061618	203.756	185.639	167.005	136.713	166.245	186.561	195.645	258.153	220.064	224.232	330.111	198.484	214.883	146.259	high	high	high	high
ENSMUST00000044823	102.671	92.2049	59.4574	82.3898	182.286	182.272	186.251	99.077	88.4997	84.126	93.8849	168.309	187.089	203.954	high	high	high	high
ENSMUST00000028852	55.1014	51.225	43.7186	38.9314	176.635	177.984	169.233	50.92	56.1025	43.783	52.4948	186.326	188.836	184.11	high	high	high	high
ENSMUST00000037099	149.051	151.626	152.141	203.711	220.566	190.85	212.256	167.76	197.939	206.406	151.427	231.736	220.124	107.305	high	high	high	high
ENSMUST00000042766	84.436	62.2896	75.1961	57.9444	203.431	173.695	168.824	65.9197	59.2632	53.4779	61.0756	160.838	184.707	213.508	high	high	high	high
ENSMUST00000043812	81.6611	76.2228	130.282	114.078	210.358	178.341	213.481	90.7877	78.6225	77.2458	81.7707	201.56	218.853	138.542	high	high	high	high
ENSMUST00000057829	197.414	211.047	241.327	272.52	218.743	233.738	236.626	197.364	174.629	171.692	200.389	234.079	227.112	97.3834	high	high	high	high
ENSMUST00000026506	158.565	185.229	194.985	197.373	199.968	202.823	168.552	176.839	158.825	161.997	184.236	191.014	193.283	174.188	high	high	high	high
ENSMUST00000022960	341.708	367.59	487.9	524.216	231.868	224.624	222.739	330.388	313.7	322.118	315.978	214.451	216.789	127.15	high	high	high	high
ENSMUST00000038498	65.0117	40.5702	37.598	41.6476	187.572	189.778	173.045	54.4726	45.4351	50.6632	33.8187	166.551	187.883	203.586	high	high	high	high
ENSMUST00000032561	237.055	209.408	190.613	250.791	201.791	196.568	164.195	223.022	247.325	259.258	182.217	180.467	185.183	192.194	high	high	high	high
ENSMUST00000093393	133.591	134.005	128.533	119.51	142.912	142.78	106.196	153.55	116.156	109.458	143.351	117.479	127.691	312.362	high	high	high	high
ENSMUST00000021197	53.5158	64.3386	66.4523	74.2413	133.069	142.423	99.7969	58.4199	52.1516	60.9835	54.009	109.569	121.02	326.694	high	high	high	high
ENSMUST00000112268	135.573	117.203	229.086	247.169	156.766	163.33	121.989	136.181	123.663	118.84	127.199	131.981	142.302	282.963	high	high	high	high
ENSMUST00000040518	495.12	545.034	534.242	624.714	253.195	223.731	258.546	464.991	448.425	422.194	500.215	249.021	212.342	95.546	high	high	high	high
ENSMUST00000069620	143.502	155.314	127.658	119.51	205.072	187.455	231.861	161.049	154.084	180.449	199.379	162.156	209.8	184.845	high	high	high	high
ENSMUST00000086829	18.6314	30.3252	63.8292	41.6476	204.525	171.193	179.716	40.2624	33.9776	33.4628	23.2188	179.588	206.783	170.145	high	high	high	high
ENSMUST00000048116	111.788	90.1559	74.3217	61.566	186.661	157.255	154.801	105.393	122.082	126.658	96.9134	175.633	186.295	194.399	high	high	high	high
ENSMUST00000063976	323.869	329.889	253.568	260.75	197.963	209.256	224.237	324.072	267.474	302.729	294.778	222.654	210.912	122.74	high	high	high	high
ENSMUST00000026043	83.6432	66.7974	90.9348	56.1337	206.895	201.929	217.565	69.867	81.7832	71.6166	71.1708	189.549	214.089	152.139	high	high	high	high
ENSMUST00000174510	51.1373	36.0624	34.9749	23.5399	155.308	165.117	136.149	34.7362	54.9172	56.6052	47.4472	131.102	158.184	266.426	high	high	high	high
ENSMUST00000043200	199.792	188.918	144.272	153.915	199.421	201.929	204.631	176.839	165.542	204.217	226.636	225.73	220.441	109.51	high	high	high	high
ENSMUST00000120095	90.7786	106.548	97.9298	66.0929	182.286	199.964	136.149	95.9191	72.6962	72.242	79.2469	163.621	169.302	222.696	high	high	high	high
ENSMUST00000055352	347.258	375.786	334.885	376.639	228.04	197.998	265.217	353.677	297.896	312.736	333.14	256.345	220.759	77.9067	high	high	high	high
ENSMUST00000145910	36.0736	35.2428	33.2262	37.1207	208.9	188.348	217.429	43.4202	39.1137	49.4123	36.3425	155.125	209.165	190.357	high	high	high	high
ENSMUST00000033121	315.545	376.606	264.935	252.602	192.13	178.162	228.457	328.02	289.599	304.605	321.026	217.673	194.554	142.216	high	high	high	high
ENSMUST00000028735	64.2189	95.0735	100.553	57.0391	155.672	201.751	211.303	74.209	79.0176	114.461	112.561	150.731	193.442	210.201	high	high	high	high
ENSMUST00000058479	345.672	374.147	225.588	258.939	237.336	218.906	237.307	420.386	304.613	250.814	333.645	265.72	209.165	79.3766	high	high	high	high
ENSMUST00000023913	182.35	188.098	148.643	162.063	202.884	183.702	207.49	199.338	141.837	155.117	192.313	200.242	192.489	161.326	high	high	high	high
ENSMUST00000020023	121.302	112.285	123.287	100.497	216.374	192.637	212.256	113.682	126.823	119.778	110.542	178.709	204.242	170.513	high	high	high	high
ENSMUST00000096240	192.26	205.719	183.618	155.726	199.786	211.579	210.758	170.523	227.571	242.37	209.474	198.631	203.924	150.669	high	high	high	high
ENSMUST00000033560	121.699	119.252	151.267	110.457	217.285	191.565	217.021	134.997	108.254	94.1336	121.142	221.775	218.536	112.818	high	high	high	high
ENSMUST00000039449	145.087	160.642	186.241	157.536	202.702	170.478	194.012	159.076	146.183	140.106	132.751	191.453	203.448	158.018	high	high	high	high
ENSMUST00000028205	163.719	172.935	187.116	169.306	173.719	182.987	133.97	175.654	152.109	145.11	174.141	141.502	159.931	251.359	high	high	high	high
ENSMUST00000111427	53.9122	36.0624	38.4724	44.3637	186.843	189.242	150.853	53.6831	48.2007	48.4741	38.8663	151.317	184.866	216.448	high	high	high	high
ENSMUST00000045674	148.655	143.84	152.141	121.321	194.135	219.084	262.494	123.945	112.6	139.168	141.837	212.107	219.33	120.902	high	high	high	high
ENSMUST00000114937	34.8843	28.2762	34.1005	9.9592	184.473	183.702	157.796	28.0258	22.9151	24.3934	32.3045	147.948	165.807	238.497	high	high	high	high
ENSMUST00000029786	109.014	128.267	122.412	133.091	188.848	207.29	155.89	109.34	101.538	102.265	113.57	170.066	175.813	206.159	high	high	high	high
ENSMUST00000084241	302.067	243.421	182.744	195.562	228.04	187.097	267.532	268.81	233.497	273.957	246.826	252.243	227.112	72.3944	high	high	high	high
ENSMUST00000027193	183.539	191.376	247.448	278.858	144.188	160.829	117.496	193.417	168.703	160.434	190.294	124.071	141.508	285.903	high	high	high	high
ENSMUST00000049642	67.7866	78.6816	82.1911	61.566	175.906	183.523	145.543	68.6828	55.7074	70.9911	68.1422	157.615	162.313	231.515	high	high	high	high
ENSMUST00000057115	260.047	269.648	351.498	348.572	200.879	193.888	160.791	281.442	236.658	234.239	264.493	177.098	195.189	178.965	high	high	high	high
ENSMUST00000030051	192.657	189.327	234.332	296.965	161.505	160.829	120.355	193.812	182.136	175.132	201.903	131.102	144.208	275.613	high	high	high	high
ENSMUST00000018186	151.43	157.773	168.754	134.902	199.421	206.218	182.711	149.997	180.95	190.769	181.713	190.428	196.46	163.898	high	high	high	high
ENSMUST00000060077	149.844	132.365	111.92	125.848	193.77	164.581	222.603	144.471	134.33	146.673	122.656	194.383	197.889	158.386	high	high	high	high
ENSMUST00000034244	294.535	317.185	302.533	335.897	178.64	183.345	207.763	328.415	256.017	298.35	333.14	205.808	192.807	151.771	high	high	high	high
ENSMUST00000044189	64.2189	53.274	46.3418	27.1615	130.699	142.78	136.421	62.3672	58.473	70.9911	72.6851	153.367	164.378	232.618	high	high	high	high
ENSMUST00000056228	84.0396	68.0268	97.0554	85.1059	168.797	173.695	146.087	82.4984	82.9685	81.9368	68.647	143.993	161.361	244.745	high	high	high	high
ENSMUST00000040307	179.575	152.855	123.287	111.362	177.547	194.067	178.218	187.102	165.542	182.638	182.217	200.242	202.812	146.994	high	high	high	high
ENSMUST00000029423	95.5355	95.4833	122.412	133.091	199.786	196.211	199.049	105.787	98.772	84.4387	70.1613	198.777	195.824	155.446	high	high	high	high
ENSMUST00000032169	205.738	184.41	146.895	207.332	181.01	181.558	150.036	198.549	180.16	186.391	179.694	186.912	159.772	202.851	high	high	high	high
ENSMUST00000040914	144.691	164.74	126.784	200.089	228.404	199.428	143.501	103.814	111.415	112.585	91.8658	161.131	159.296	228.943	high	high	high	high
ENSMUST00000046404	298.103	295.466	263.186	283.385	226.582	197.283	231.589	284.6	249.696	263.324	256.417	219.724	205.83	122.74	high	high	high	high
ENSMUST00000023191	242.605	255.305	299.036	269.804	193.952	198.891	149.083	247.495	228.756	215.788	261.969	170.799	174.066	202.851	high	high	high	high
ENSMUST00000135402	276.3	287.679	388.222	445.448	234.055	224.803	225.326	322.099	244.954	255.193	260.455	245.798	229.018	72.7619	high	high	high	high
ENSMUST00000030117	122.095	134.824	149.518	147.577	177.729	186.025	142.275	124.34	113.39	104.454	128.208	148.387	164.219	234.823	high	high	high	high
ENSMUST00000026173	133.195	123.76	143.397	153.01	166.245	179.413	146.496	128.682	106.674	132.6	114.58	159.813	161.837	225.635	high	high	high	high
ENSMUST00000026008	181.557	157.773	113.668	116.794	186.661	204.967	232.269	170.128	153.689	213.599	215.027	215.33	223.618	108.04	high	high	high	high
ENSMUST00000003345	318.716	359.394	252.694	272.52	229.498	211.758	236.082	314.994	239.423	261.76	311.94	245.505	229.018	72.3944	high	high	high	high
ENSMUST00000107206	35.6772	43.029	105.799	43.4583	131.975	137.777	119.266	52.8937	65.1895	44.7213	49.4662	141.649	163.266	241.805	high	high	high	high
ENSMUST00000045521	203.756	166.379	104.925	134.902	170.073	161.722	151.942	208.812	182.136	172.943	174.141	186.912	158.025	201.749	high	high	high	high
ENSMUST00000031538	211.685	218.833	222.091	231.778	222.571	230.342	175.495	249.469	184.901	181.7	228.15	207.273	206.624	132.662	high	high	high	high
ENSMUST00000152080	331.798	335.216	271.93	243.548	178.093	187.633	217.021	320.52	261.153	313.674	296.293	198.045	191.536	156.916	high	high	high	high
ENSMUST00000043211	247.362	261.862	248.322	222.724	217.103	216.225	192.106	265.653	223.225	226.734	292.255	209.324	214.565	122.372	high	high	high	high
ENSMUST00000059596	148.655	135.644	128.533	155.726	191.947	201.929	163.923	131.445	118.921	122.593	129.723	175.047	191.854	179.332	high	high	high	high
ENSMUST00000045994	84.8324	86.0579	83.0654	92.349	152.391	165.832	165.148	74.6038	77.4372	74.1184	70.666	157.908	160.09	227.84	high	high	high	high
ENSMUST00000027846	59.0655	51.225	76.9448	67.9036	136.168	154.038	125.665	62.3672	52.9418	69.1147	56.5328	136.961	157.867	250.624	high	high	high	high
ENSMUST00000031101	99.8961	103.27	123.287	76.9575	157.677	178.162	149.491	98.6822	82.9685	91.6317	101.456	172.996	173.59	198.809	high	high	high	high
ENSMUST00000030606	168.872	166.379	103.176	102.308	212.728	192.994	229.546	183.154	157.245	182.638	192.313	201.121	199.795	144.421	high	high	high	high
ENSMUST00000026699	45.1911	31.5546	38.4724	26.2561	84.2162	95.6037	99.933	45.3938	47.0155	37.8411	50.4757	87.8897	109.427	348.008	high	high	high	high
ENSMUST00000096250	226.352	195.884	208.975	205.522	176.453	159.756	153.712	234.864	204.656	183.263	209.474	161.131	172.796	211.304	high	high	high	high
ENSMUST00000050467	121.699	111.875	90.9348	96.8759	185.932	182.451	197.688	155.918	157.245	200.464	166.065	174.9	199.318	170.513	high	high	high	high
ENSMUST00000161286	60.2548	65.9778	129.407	96.8759	153.849	161.722	121.989	67.4987	61.6337	71.3038	66.1232	130.516	151.196	262.751	high	high	high	high
ENSMUST00000025906	143.105	136.463	128.533	122.227	215.644	226.232	164.604	172.102	145.392	143.859	148.399	199.363	203.13	141.849	high	high	high	high
ENSMUST00000079081	42.8126	43.4388	31.4774	36.2153	222.571	209.613	219.063	26.4468	109.834	147.924	105.999	174.314	224.571	144.789	high	high	high	high
ENSMUST00000026122	322.284	343.002	314.774	383.882	223.665	196.211	232.406	337.099	342.936	345.573	370.492	226.023	216.471	100.323	high	high	high	high
ENSMUST00000087085	27.3525	22.9488	54.2111	11.77	152.209	143.674	140.641	27.2363	24.8905	29.7099	18.1713	137.987	161.519	243.275	high	high	high	high
ENSMUST00000042662	133.988	108.597	165.256	185.603	217.467	213.187	200.274	152.365	124.848	132.6	124.675	205.076	216.789	120.902	high	high	high	high
ENSMUST00000057015	45.5875	36.4722	48.9649	56.1337	234.238	181.558	201.091	52.499	85.7341	72.5548	43.9139	155.125	215.2	172.35	high	high	high	high
ENSMUST00000039349	264.408	253.666	254.443	210.954	178.823	171.729	180.805	232.101	218.484	201.402	231.684	183.543	190.424	168.675	high	high	high	high
ENSMUST00000033927	117.735	128.677	120.663	150.293	158.589	159.756	182.439	133.813	131.959	135.727	113.066	170.945	165.013	206.526	high	high	high	high
ENSMUST00000017975	297.31	245.47	266.684	332.275	264.679	237.669	266.579	271.968	250.091	234.865	255.912	253.122	263.164	26.0914	high	high	high	high
ENSMUST00000108817	65.8046	79.0914	59.4574	80.579	147.652	154.217	109.327	57.2357	54.5221	50.3505	55.0186	123.631	131.979	286.638	high	high	high	high
ENSMUST00000006380	752.788	783.127	1066.73	1088.27	191.947	192.637	225.054	790.642	694.96	657.371	873.23	237.302	217.106	87.8288	high	high	high	high
ENSMUST00000027538	91.175	72.9444	61.2061	33.4991	146.376	137.955	135.195	84.8667	70.7207	64.4236	56.5328	138.28	136.585	267.161	high	high	high	high
ENSMUST00000088201	63.0297	33.6036	111.045	25.3507	199.239	127.948	86.4543	41.4465	32.0021	28.7717	2.52379	182.225	187.725	171.983	high	high	high	high
ENSMUST00000170000	149.448	141.381	157.387	190.13	180.099	190.314	190.199	166.576	134.725	147.611	122.656	185.154	199.954	156.548	high	high	high	high
ENSMUST00000023686	139.141	143.43	161.759	163.874	202.884	201.393	175.495	143.681	137.886	132.287	153.951	198.777	197.254	145.524	high	high	high	high
ENSMUST00000037828	126.852	118.842	105.799	109.551	140.725	158.863	143.773	116.445	120.502	150.739	109.028	127.44	117.844	296.192	high	high	high	high
ENSMUST00000075666	419.801	404.063	298.161	291.533	235.878	220.514	244.25	430.649	393.112	386.855	435.101	229.685	226	85.6239	high	high	high	high
ENSMUST00000044148	213.27	201.621	181.87	164.78	228.404	185.31	242.208	208.022	177.79	181.074	196.351	206.248	206.783	128.252	high	high	high	high
ENSMUST00000034280	75.3185	74.9934	69.9498	52.5122	147.287	159.22	143.637	82.1036	66.3748	84.7515	91.3611	152.635	158.978	229.31	high	high	high	high
ENSMUST00000094942	68.9759	74.9934	115.417	86.0113	137.444	148.498	96.5293	101.051	77.8323	66.9255	75.7136	152.489	167.872	220.491	high	high	high	high
ENSMUST00000030734	131.213	138.512	131.156	179.266	185.567	197.998	165.965	121.182	128.008	127.909	137.799	176.951	174.543	188.887	high	high	high	high
ENSMUST00000019937	68.9759	67.617	63.8292	48.8906	215.644	204.967	194.012	75.3932	64.3993	65.9873	66.1232	188.23	213.294	138.542	high	high	high	high
ENSMUST00000023088	293.346	274.566	243.076	238.115	196.322	205.146	201.772	261.705	224.805	232.988	272.064	190.135	182.325	167.573	high	high	high	high
ENSMUST00000097588	148.258	153.675	142.523	81.4844	156.037	137.598	175.087	147.629	130.379	129.473	140.323	192.185	169.46	178.23	high	high	high	high
ENSMUST00000053699	88.4001	75.4032	97.0554	77.8628	193.406	191.029	210.349	99.4717	100.352	86.9406	74.1993	163.768	204.083	171.983	high	high	high	high
ENSMUST00000021851	628.315	642.976	805.297	718.873	210.723	184.238	251.602	666.697	544.431	491.621	638.013	231.15	201.701	106.938	high	high	high	high
ENSMUST00000087517	140.33	124.579	139.9	90.5382	167.885	184.596	177.538	164.602	140.256	144.797	124.675	183.982	193.919	161.693	high	high	high	high
ENSMUST00000039205	88.7965	74.9934	53.3367	94.1597	227.311	226.411	209.941	60.7883	175.419	232.676	271.559	186.033	207.259	146.259	high	high	high	high
ENSMUST00000029404	260.84	266.37	249.196	261.655	207.077	191.565	237.579	285.389	246.93	193.584	219.065	220.75	206.942	111.715	high	high	high	high
ENSMUST00000164099	230.712	236.864	192.362	169.306	206.895	191.029	205.04	238.811	185.296	186.703	197.36	220.164	205.671	113.553	high	high	high	high
ENSMUST00000020165	202.963	201.212	241.327	197.373	249.185	235.167	210.894	216.706	169.493	173.569	240.265	227.341	237.435	74.5993	high	high	high	high
ENSMUST00000049393	60.6512	56.5524	53.3367	36.2153	155.308	145.997	138.055	55.6568	56.4976	54.1033	54.009	126.561	148.814	263.854	high	high	high	high
ENSMUST00000041093	120.51	124.989	79.5679	117.7	213.457	213.723	225.19	126.708	146.183	123.218	115.085	185.008	221.553	132.662	high	high	high	high
ENSMUST00000102759	118.924	91.7951	103.176	115.889	231.503	212.294	198.913	101.051	93.6358	82.8751	87.323	214.89	219.806	104.366	high	high	high	high
ENSMUST00000022787	133.988	94.2539	45.4674	50.7014	138.173	127.233	145.543	124.734	97.9818	148.862	135.78	207.127	147.702	184.11	high	high	high	high
ENSMUST00000029510	181.557	203.67	164.382	127.659	207.077	213.545	185.707	158.286	178.185	207.969	198.874	193.504	187.089	158.018	high	high	high	high
ENSMUST00000067880	34.8843	30.735	72.573	39.8368	184.291	160.114	169.913	36.3151	46.6204	52.8524	50.9805	147.801	176.131	214.611	high	high	high	high
ENSMUST00000048937	172.043	196.294	166.131	198.279	179.187	187.455	204.631	142.892	126.428	148.237	128.713	199.949	173.59	165.001	high	high	high	high
ENSMUST00000034644	331.798	351.608	266.684	264.372	189.395	183.523	197.279	335.125	272.611	267.389	317.492	189.109	178.513	170.88	high	high	high	high
ENSMUST00000040312	164.511	160.642	134.653	161.158	267.414	169.406	195.918	93.5508	94.8211	140.731	153.446	155.565	175.654	207.261	high	high	high	high
ENSMUST00000025101	255.686	251.617	303.407	351.288	220.019	218.906	213.481	263.284	212.557	219.853	242.788	219.431	208.371	110.245	high	high	high	high
ENSMUST00000169707	64.6153	61.8798	76.0704	58.8498	234.42	220.514	256.368	79.7353	70.7207	61.9217	68.1422	225.437	261.893	50.7129	high	high	high	high
ENSMUST00000043937	73.7328	83.1894	80.4423	124.943	157.86	171.193	133.562	87.2351	100.352	110.083	100.951	141.649	163.425	232.618	high	high	high	high
ENSMUST00000030896	197.017	185.229	229.086	276.141	174.995	178.877	136.012	175.26	171.863	161.997	200.893	147.655	162.155	227.84	high	high	high	high
ENSMUST00000109930	113.374	107.368	76.0704	69.7144	218.926	197.819	220.561	110.919	111.02	109.77	119.123	213.279	211.389	112.818	high	high	high	high
ENSMUST00000080371	55.1014	59.8308	58.583	60.6606	139.631	154.396	128.388	63.5514	100.352	72.5548	64.1042	149.705	157.231	230.413	high	high	high	high
ENSMUST00000027271	65.4082	63.1092	69.9498	29.8776	142.183	134.024	168.552	65.525	54.9172	60.0453	66.1232	115.428	148.02	273.408	high	high	high	high
ENSMUST00000041643	355.186	352.018	232.583	258.034	209.264	218.191	215.251	384.861	288.809	310.234	327.588	223.533	189.313	123.475	high	high	high	high
ENSMUST00000036576	109.806	109.826	132.905	112.267	128.147	130.629	143.092	146.444	113.39	132.287	150.922	189.109	178.831	168.308	high	high	high	high
ENSMUST00000061568	98.3104	93.0245	107.548	86.9167	181.01	152.251	180.124	136.971	111.415	89.1298	92.8754	192.039	204.401	139.644	high	high	high	high
ENSMUST00000038738	89.9858	86.4677	100.553	109.551	200.15	203.716	192.378	85.6562	92.0555	87.8788	86.3135	199.363	224.412	112.083	high	high	high	high
ENSMUST00000088955	193.846	219.243	187.99	114.078	181.375	202.465	136.829	114.077	143.417	183.263	167.579	164.207	165.49	205.791	high	high	high	high
ENSMUST00000038377	178.386	180.312	164.382	163.874	189.76	184.953	169.505	180.786	199.124	237.054	224.112	181.346	190.583	163.531	high	high	high	high
ENSMUST00000110463	68.183	63.1092	105.799	111.362	202.884	204.788	164.467	97.1033	64.7944	67.2383	46.4377	183.836	193.283	158.018	high	high	high	high
ENSMUST00000013759	93.1571	83.5992	88.3117	82.3898	177.911	180.128	168.416	94.735	96.7965	87.8788	96.9134	181.053	203.765	150.301	high	high	high	high
ENSMUST00000002911	358.754	340.134	244.824	251.696	187.572	199.785	205.176	308.283	279.327	274.895	295.788	204.783	176.29	153.976	high	high	high	high
ENSMUST00000044954	43.209	34.4232	33.2262	38.9314	190.489	166.011	173.045	35.5256	44.2498	48.1614	38.8663	133.446	179.625	221.961	high	high	high	high
ENSMUST00000036665	353.6	362.263	332.262	396.557	199.786	196.568	249.833	313.02	265.499	289.906	294.778	208.884	200.43	125.68	high	high	high	high
ENSMUST00000036383	186.314	211.457	167.88	176.549	186.296	190.671	194.012	200.128	160.406	162.935	205.436	213.718	188.36	132.662	high	high	high	high
ENSMUST00000042724	127.645	126.628	143.397	136.713	196.869	194.245	199.321	131.05	111.415	123.531	122.151	179.734	189.472	165.368	high	high	high	high
ENSMUST00000030622	161.34	147.118	225.588	211.859	169.708	172.087	131.928	142.102	128.008	138.855	139.313	141.502	152.308	240.335	high	high	high	high
ENSMUST00000074941	160.944	191.786	172.251	199.184	119.397	153.323	145.951	202.891	166.332	199.213	201.903	164.94	161.361	207.629	high	high	high	high
ENSMUST00000116259	152.223	140.561	178.372	116.794	239.706	229.806	213.345	156.707	137.491	135.102	130.732	220.164	239.023	74.2319	high	high	high	high
ENSMUST00000077667	173.629	39.3408	186.241	44.3637	218.926	67.1906	62.2199	50.5253	21.7298	114.774	11.1047	168.016	205.195	159.856	high	high	high	high
ENSMUST00000098651	118.924	112.285	108.422	80.579	159.683	152.966	175.495	120.392	101.933	113.523	100.447	160.545	156.278	215.713	high	high	high	high
ENSMUST00000047431	98.3104	102.04	71.6986	63.3767	170.437	174.767	134.106	69.867	77.8323	70.6783	97.9229	148.973	156.437	227.105	high	high	high	high
ENSMUST00000022980	244.19	256.535	324.392	423.719	176.271	181.2	134.787	250.653	224.41	209.22	266.512	151.903	156.437	224.166	high	high	high	high
ENSMUST00000044053	29.731	31.1448	55.0855	33.4991	174.995	155.289	163.242	35.1309	30.8169	34.7137	22.2093	152.342	183.119	196.237	high	high	high	high
ENSMUST00000030643	310.391	265.55	206.352	199.184	217.103	178.52	155.073	264.074	231.521	193.896	241.274	166.99	144.367	220.123	high	high	high	high
ENSMUST00000022189	89.1929	88.9265	89.186	100.497	201.791	222.658	180.669	73.0249	69.9306	75.9949	84.7992	189.109	212.818	128.987	high	high	high	high
ENSMUST00000031251	119.717	124.579	125.91	107.74	188.302	189.599	142.275	121.971	125.638	130.098	119.123	168.455	173.907	188.52	high	high	high	high
ENSMUST00000085513	193.053	157.363	126.784	141.24	166.063	166.547	148.674	177.628	169.493	204.842	171.618	201.267	179.148	150.301	high	high	high	high
ENSMUST00000074408	256.479	244.65	192.362	145.766	180.463	172.801	176.448	250.653	198.729	171.067	240.769	174.314	175.972	180.067	high	high	high	high
ENSMUST00000006853	451.911	472.499	479.156	516.068	229.316	211.4	231.997	465.78	369.012	349.952	406.834	255.466	220.6	54.0202	high	high	high	high
ENSMUST00000031984	136.366	137.283	180.995	182.887	159.5	143.852	163.514	140.524	146.183	124.469	110.037	142.088	159.137	228.208	high	high	high	high
ENSMUST00000046306	74.5257	65.1582	92.6835	95.0651	183.197	174.231	165.557	87.2351	64.0042	68.8019	69.6565	170.652	169.302	189.254	high	high	high	high
ENSMUST00000062613	163.719	147.938	165.256	172.928	186.479	181.736	173.317	170.523	160.801	156.994	165.56	194.969	186.136	148.096	high	high	high	high
ENSMUST00000020986	96.7248	83.1894	65.578	43.4583	192.494	185.846	151.669	106.577	79.0176	87.5661	92.8754	192.185	190.583	146.259	high	high	high	high
ENSMUST00000098603	39.6413	33.6036	48.0905	34.4045	180.463	145.639	144.998	43.0255	43.0646	36.5901	25.2379	104.003	159.296	265.691	high	high	high	high
ENSMUST00000109349	44.0019	49.176	19.2362	33.4991	86.5859	129.735	101.431	39.0782	43.8548	53.7906	63.5994	121.434	135.791	271.571	high	high	high	high
ENSMUST00000042665	172.836	153.675	139.025	130.375	218.743	186.204	170.594	171.707	138.676	128.222	121.647	220.75	195.824	112.083	high	high	high	high
ENSMUST00000075774	344.087	387.671	511.508	863.734	146.376	139.564	155.754	366.308	500.181	450.965	405.32	159.666	147.226	221.593	high	high	high	high
ENSMUST00000055984	129.231	104.909	89.186	100.497	183.197	187.633	195.782	128.287	121.292	130.411	143.351	182.957	197.73	147.729	high	high	high	high
ENSMUST00000025836	155.79	165.559	143.397	177.455	173.354	187.991	147.177	143.287	142.627	132.913	130.732	155.565	163.425	209.099	high	high	high	high
ENSMUST00000065286	134.384	115.973	142.523	129.47	160.594	175.303	134.651	142.497	120.502	120.403	114.58	166.258	162.313	199.177	high	high	high	high
ENSMUST00000011400	160.151	130.316	108.422	87.822	212.181	177.984	171.411	141.313	132.354	141.357	116.599	198.777	207.259	121.637	high	high	high	high
ENSMUST00000066091	55.4978	45.8976	71.6986	51.6068	195.228	220.157	172.909	49.3411	50.9663	58.7944	55.5233	168.016	193.442	166.103	high	high	high	high
ENSMUST00000045286	128.041	109.007	101.427	76.0521	169.526	185.489	172.092	191.838	111.81	135.727	168.084	179.441	166.443	181.537	high	high	high	high
ENSMUST00000105139	157.772	176.214	173.126	232.683	166.792	174.946	123.078	174.075	141.046	143.546	147.389	143.407	149.29	234.455	high	high	high	high
ENSMUST00000024762	229.523	238.094	293.789	354.004	183.015	187.991	146.496	221.048	192.803	187.016	251.369	155.418	164.06	207.629	high	high	high	high
ENSMUST00000092834	124.474	109.826	133.779	88.7274	184.838	167.977	206.673	120.787	103.513	110.709	120.637	205.076	195.983	126.047	high	high	high	high
ENSMUST00000025439	266.39	274.976	232.583	296.06	210.358	195.675	197.96	275.521	226.78	242.683	240.265	216.794	205.83	103.998	high	high	high	high
ENSMUST00000021933	134.78	174.575	124.161	180.171	187.025	180.664	193.875	148.023	212.162	202.653	170.103	172.557	197.413	156.548	high	high	high	high
ENSMUST00000060500	133.988	134.414	187.99	232.683	213.457	181.379	220.016	149.997	125.243	115.4	115.085	183.25	189.154	153.976	high	high	high	high
ENSMUST00000055303	126.456	135.234	90.9348	105.024	160.047	182.809	162.017	116.445	117.341	108.207	110.542	173.436	183.754	169.043	high	high	high	high
ENSMUST00000097644	52.7229	54.9132	50.7136	37.1207	154.032	149.035	139.961	60.3935	43.4597	63.1727	48.9615	145.457	145.796	234.823	high	high	high	high
ENSMUST00000016771	539.915	581.506	548.232	431.867	219.655	139.027	237.307	518.279	531.788	649.866	605.709	196.58	176.448	152.874	high	high	high	high
ENSMUST00000080281	64.2189	59.421	95.3066	67.9036	170.802	179.771	146.768	50.5253	56.1025	50.6632	54.5138	159.227	168.19	198.442	high	high	high	high
ENSMUST00000056045	82.0575	94.6637	90.0604	75.1467	209.629	196.568	194.012	85.2615	66.7698	68.4892	91.8658	184.861	202.018	138.909	high	high	high	high
ENSMUST00000041111	168.079	177.033	233.458	289.722	131.793	151	109.055	181.181	168.703	146.986	175.151	122.313	129.279	274.143	high	high	high	high
ENSMUST00000094245	357.565	383.163	417.95	558.621	251.008	227.662	218.382	325.257	329.503	327.747	334.654	224.558	224.571	76.4368	high	high	high	high
ENSMUST00000090511	31.713	27.0468	9.6181	17.2023	135.621	151.894	106.74	30.3941	25.2856	25.9571	27.7617	110.741	140.396	274.143	high	high	high	high
ENSMUST00000026408	39.6413	29.9154	24.4824	29.8776	181.557	200.142	196.054	34.3414	88.4997	101.326	113.066	169.481	187.248	168.308	high	high	high	high
ENSMUST00000101558	190.675	196.294	203.729	228.156	207.077	206.575	199.73	200.522	148.553	154.179	170.608	215.183	209.324	100.323	high	high	high	high
ENSMUST00000067103	159.754	136.463	110.171	111.362	184.109	198.713	196.19	132.629	131.564	123.531	120.132	186.033	191.695	146.626	high	high	high	high
ENSMUST00000147041	82.8503	104.909	156.513	164.78	149.11	144.746	184.209	104.208	101.933	99.7628	83.7897	163.621	214.089	146.626	high	high	high	high
ENSMUST00000038188	109.806	109.826	212.473	113.173	199.968	196.39	191.289	117.235	81.7832	99.1373	81.2659	174.461	177.878	171.983	high	high	high	high
ENSMUST00000024738	136.763	104.909	90.0604	104.119	185.749	205.503	162.697	107.366	271.03	263.636	183.227	206.834	202.812	114.288	high	high	high	high
ENSMUST00000089289	186.314	179.082	210.724	249.885	231.686	195.139	209.396	190.259	144.602	141.669	173.132	226.902	224.094	72.7619	high	high	high	high
ENSMUST00000112308	68.9759	61.0602	66.4523	42.553	151.48	155.289	131.792	67.8934	73.8814	58.4816	65.1137	149.412	168.507	205.424	high	high	high	high
ENSMUST00000117786	85.2288	88.9265	76.0704	88.7274	165.88	155.468	140.914	76.9722	95.2162	109.77	100.447	141.502	152.784	228.943	high	high	high	high
ENSMUST00000102874	152.223	149.167	257.94	257.128	156.401	157.969	128.252	154.339	137.886	123.843	166.065	142.381	148.337	231.883	high	high	high	high
ENSMUST00000021204	114.96	122.12	87.4373	103.214	152.756	167.619	127.707	95.1297	127.613	125.094	98.4277	161.57	151.196	209.834	high	high	high	high
ENSMUST00000062991	154.601	161.871	178.372	178.36	197.78	206.218	236.354	169.339	152.109	155.743	163.541	208.884	215.2	98.4858	high	high	high	high
ENSMUST00000038213	33.6951	33.6036	44.593	38.026	157.86	146.89	145.134	43.0255	36.3481	37.2156	36.8473	157.03	184.707	180.802	high	high	high	high
ENSMUST00000038863	251.326	222.931	330.513	468.082	146.376	149.392	123.759	246.311	243.769	210.159	309.416	151.024	135.949	235.558	high	high	high	high
ENSMUST00000049927	115.753	116.383	99.6785	162.969	160.594	175.303	150.58	125.129	93.6358	107.894	109.532	182.371	177.878	162.061	high	high	high	high
ENSMUST00000108075	45.9839	45.4878	59.4574	37.1207	182.286	187.276	157.796	56.0515	47.0155	51.9142	53.5043	168.455	188.36	165.001	high	high	high	high
ENSMUST00000063192	454.289	441.354	397.84	411.949	213.639	188.706	255.823	432.228	355.579	369.029	429.044	239.06	209.642	72.7619	high	high	high	high
ENSMUST00000008094	393.638	419.225	335.759	405.611	188.119	177.09	178.082	397.097	338.59	353.392	355.854	210.496	183.436	127.517	high	high	high	high
ENSMUST00000006027	53.1194	42.6192	55.9599	62.4714	135.256	153.323	107.013	24.4732	143.812	145.11	65.6185	111.913	179.466	230.045	high	high	high	high
ENSMUST00000172332	25.3704	17.6214	25.3568	27.1615	192.494	160.65	152.895	26.8416	31.2119	40.9684	23.7236	120.409	163.108	237.762	high	high	high	high
ENSMUST00000102801	88.4001	93.0245	142.523	71.5252	231.321	193.173	176.857	83.6825	62.819	73.1802	75.2089	194.383	208.848	117.963	high	high	high	high
ENSMUST00000001415	165.304	184.41	143.397	143.956	195.958	201.215	173.726	168.549	150.528	139.48	145.875	182.957	175.019	163.163	high	high	high	high
ENSMUST00000143850	84.8324	95.0735	98.8041	112.267	187.208	174.946	185.979	82.4984	64.3993	82.5623	78.7422	171.238	188.201	161.693	high	high	high	high
ENSMUST00000002412	162.529	104.909	69.9498	93.2543	179.005	180.307	131.656	158.681	122.872	103.203	105.999	192.918	151.99	176.025	high	high	high	high
ENSMUST00000035336	107.428	85.6481	62.0805	82.3898	174.63	151.894	161.336	104.208	87.7095	83.1878	80.2564	161.863	153.896	205.056	high	high	high	high
ENSMUST00000035220	282.643	289.728	221.216	198.279	162.964	135.811	230.091	280.652	274.191	275.208	294.778	188.523	176.766	155.446	high	high	high	high
ENSMUST00000019302	81.6611	89.7461	91.8092	65.1875	120.127	142.065	94.0786	72.2354	65.5846	65.3618	69.1518	106.2	113.556	300.97	high	high	high	high
ENSMUST00000067976	67.3902	53.6838	55.9599	41.6476	146.558	144.388	155.618	63.9461	111.415	138.855	70.666	136.961	168.666	214.978	high	high	high	high
ENSMUST00000025418	129.627	123.35	132.03	124.037	164.604	166.368	132.064	105.787	88.4997	91.6317	104.99	148.826	158.819	212.773	high	high	high	high
ENSMUST00000099494	288.985	293.007	341.88	336.802	213.457	171.372	246.837	395.518	277.352	239.243	309.921	224.265	225.524	70.557	high	high	high	high
ENSMUST00000039551	126.456	102.45	105.799	112.267	161.141	145.639	165.012	110.524	103.908	99.7628	85.8088	167.869	160.884	191.459	high	high	high	high
ENSMUST00000120613	74.9221	88.5167	108.422	90.5382	146.193	154.038	114.909	74.209	58.8681	69.1147	88.3325	123.924	137.855	258.342	high	high	high	high
ENSMUST00000037397	351.618	366.771	396.965	366.68	142.001	124.017	165.693	545.515	480.822	433.765	508.795	219.285	201.859	98.8533	high	high	high	high
ENSMUST00000060148	381.746	393.818	326.141	205.522	175.724	168.513	211.439	389.203	310.934	394.047	391.692	173.875	184.389	161.693	high	high	high	high
ENSMUST00000046316	66.9938	56.9622	68.2011	46.1745	147.287	135.096	162.289	58.0252	54.5221	60.9835	77.7326	117.479	165.331	237.027	high	high	high	high
ENSMUST00000166033	78.8862	67.617	129.407	116.794	176.635	181.2	152.486	66.3145	65.1895	81.9368	64.1042	160.838	179.625	179.332	high	high	high	high
ENSMUST00000112642	88.7965	81.1404	119.789	71.5252	227.858	198.534	209.805	122.366	86.1292	80.9986	64.1042	213.132	219.171	87.4613	high	high	high	high
ENSMUST00000132484	17.8386	13.1136	26.2312	25.3507	103.538	94.8889	88.4965	42.6307	26.866	23.4552	28.2664	130.809	148.02	240.702	high	high	high	high
ENSMUST00000096987	602.944	649.533	814.041	906.287	231.686	208.72	251.058	646.171	578.804	534.779	665.27	272.165	230.447	16.9043	high	high	high	high
ENSMUST00000035785	233.884	246.29	234.332	283.385	203.067	210.507	181.486	212.364	216.903	219.853	236.226	191.892	194.554	132.662	high	high	high	high
ENSMUST00000030765	151.826	183.59	121.538	111.362	164.057	197.462	145.134	178.812	162.776	166.376	158.494	144.578	191.377	183.007	high	high	high	high
ENSMUST00000028341	160.151	175.804	152.141	140.334	216.92	216.225	178.763	164.997	146.183	143.859	175.656	193.65	199.16	126.047	high	high	high	high
ENSMUST00000109191	60.2548	175.804	157.387	27.1615	88.9556	222.48	293.672	114.866	96.7965	252.378	303.359	166.99	227.588	124.21	high	high	high	high
ENSMUST00000071755	119.32	136.873	179.246	238.115	200.697	192.994	205.04	202.101	153.689	199.526	212.503	202.293	205.036	111.348	high	high	high	high
ENSMUST00000087215	109.014	121.711	101.427	122.227	170.984	172.98	176.721	116.84	104.698	129.473	129.218	169.481	167.872	180.802	high	high	high	high
ENSMUST00000167662	115.356	108.187	80.4423	123.132	189.76	175.303	150.308	113.287	104.303	129.473	134.265	166.551	174.066	177.495	high	high	high	high
ENSMUST00000031588	240.623	238.913	161.759	198.279	185.932	187.097	221.105	219.075	211.372	204.217	215.531	212.546	185.183	120.167	high	high	high	high
ENSMUST00000081932	48.3624	54.0936	64.7036	68.809	171.167	151.179	167.463	52.1042	52.9418	62.8599	52.4948	147.362	175.654	194.767	high	high	high	high
ENSMUST00000023157	275.507	288.909	220.342	186.509	185.932	179.949	188.702	266.442	237.448	239.243	259.445	207.127	179.625	130.824	high	high	high	high
ENSMUST00000001818	114.96	135.644	130.282	130.375	187.208	193.709	186.387	129.866	111.02	117.589	109.532	174.461	181.372	161.693	high	high	high	high
ENSMUST00000063854	239.037	195.884	233.458	231.778	192.312	167.083	192.786	197.364	180.16	171.379	180.703	178.27	176.766	162.428	high	high	high	high
ENSMUST00000064234	94.7427	102.86	76.9448	131.28	194.682	177.448	170.186	74.209	251.276	238.305	125.685	142.967	170.096	204.321	high	high	high	high
ENSMUST00000032372	111.788	104.499	136.402	114.078	197.051	188.17	204.631	118.419	95.6113	98.8246	121.142	193.211	195.03	128.987	high	high	high	high
ENSMUST00000027975	126.852	129.907	152.141	168.401	188.484	193.709	144.862	128.682	117.341	114.774	128.713	159.373	173.431	184.11	high	high	high	high
ENSMUST00000033934	178.386	195.065	186.241	191.036	188.848	202.644	185.434	177.628	141.441	146.048	165.56	172.703	186.454	157.283	high	high	high	high
ENSMUST00000048896	365.096	331.528	266.684	133.091	193.588	202.823	228.866	306.704	295.921	322.118	356.863	209.177	200.43	106.57	high	high	high	high
ENSMUST00000020523	75.7149	79.5012	86.5629	86.0113	185.203	181.915	172.092	80.13	71.906	69.4274	73.1898	171.678	172.319	171.983	high	high	high	high
ENSMUST00000002013	224.766	242.192	351.498	392.936	158.589	166.19	124.848	253.021	206.236	196.711	220.579	136.815	143.096	235.19	high	high	high	high
ENSMUST00000051209	208.91	198.753	266.684	65.1875	197.416	166.726	191.425	172.891	151.714	141.982	162.532	181.639	205.512	127.885	high	high	high	high
[truncated: 20,727 more rows]

## Sheet: TE KO vs WT
Translational efficiency comparison (KO vs WT)
TranscriptID	GeneSymbol	KO/WT log2FC DE	padj	WT_log2TE	WT_Tefoldchange	KO_log2TE	KO_Tefoldchange
ENSMUST00000136370	Ccnl2	-0.447624	0.749718	-5.83035	0.0175748	-2.55104	0.170631
ENSMUST00000124246	Gt(ROSA)26Sor	-2.85053	0.121365	2.32749	5.01933	5.18883	36.4748
ENSMUST00000128800	Gm13091	-0.523611	0.690913	-4.96883	0.0319324	-2.15544	0.224464
ENSMUST00000141746	Frmd4a	-2.53487	NA	2.35634	5.12071	5.14269	35.3268
ENSMUST00000185525	Fam135a	-0.110145	0.937957	-6.14563	0.0141247	-3.38376	0.0958046
ENSMUST00000191293	2310035C23Rik	-0.95795	0.451406	-5.60096	0.0206035	-3.01096	0.124054
ENSMUST00000118307	Gm12191	-0.640012	0.548211	-5.08728	0.0294156	-2.55095	0.170642
ENSMUST00000150161	Ogt	0.00152855	0.998996	-6.96114	0.00802578	-4.44808	0.0458137
ENSMUST00000134714	Slc25a51	-0.721447	0.748346	-5.08835	0.0293936	-2.73953	0.149733
ENSMUST00000067450	2700046A07Rik	-2.1165	NA	3.66561	12.6899	5.87001	58.4857
ENSMUST00000184281	Mir6240	#VALUE!	NA	2.63061	6.19287	4.79672	27.7944
ENSMUST00000165350	Gm17066	-1.43264	0.338175	2.05588	4.15798	4.21107	18.5208
ENSMUST00000150014	Mbnl3	-1.73782	0.284568	-4.8907	0.0337096	-2.75358	0.148283
ENSMUST00000117205	Gm13423	-1.41962	NA	2.54829	5.84939	4.66914	25.442
ENSMUST00000141115	Tnrc6c	-0.960473	NA	-4.83919	0.0349348	-2.74572	0.149093
ENSMUST00000137060	Ccdc157	0.399119	0.752146	-5.83595	0.0175067	-3.76397	0.0736094
ENSMUST00000178135	Gm3699	-0.322829	0.642191	-5.246	0.0263511	-3.19422	0.109256
ENSMUST00000117142	Gm14279	0.363444	0.666428	-3.84882	0.069405	-1.92984	0.262458
ENSMUST00000151741	Ddx5	-0.857451	NA	-4.91054	0.033249	-3.04517	0.121147
ENSMUST00000184681	Mir7664	0.146861	0.943054	-5.2069	0.0270749	-3.35599	0.0976669
ENSMUST00000190077	1700124L16Rik	-1.33544	NA	2.3923	5.24993	4.20097	18.3916
ENSMUST00000117621	Gm13750	-3.18764	NA	2.07225	4.20541	3.87399	14.6618
ENSMUST00000189384	Clasp1	-0.436535	NA	-4.32736	0.049812	-2.55194	0.170526
ENSMUST00000190893	Dzip1l	0.78886	0.227847	-5.07615	0.0296434	-3.31094	0.100764
ENSMUST00000147943	Tub	0.45606	0.613776	-6.11146	0.0144633	-4.35304	0.0489334
ENSMUST00000181253	Rian	-1.43956	NA	1.99993	3.99982	3.75394	13.4912
ENSMUST00000177321	3632451O06Rik	-1.16638	NA	3.41306	10.652	5.15392	35.6027
ENSMUST00000153526	Kat2a	-0.112785	0.958422	-5.0832	0.0294988	-3.36829	0.0968375
ENSMUST00000159419	Nrxn1	-2.63552	NA	1.87809	3.67589	3.58648	12.0127
ENSMUST00000069773	BC051076	-1.12476	0.541434	2.25386	4.76957	3.96176	15.5814
ENSMUST00000128711	Reps1	-0.951225	0.518835	-5.58649	0.0208113	-3.8814	0.0678549
ENSMUST00000153935	Rdh5	-0.633951	NA	-3.77993	0.0727994	-2.09443	0.234161
ENSMUST00000121613	Uqcrh-ps2	#VALUE!	NA	3.28223	9.72856	4.94606	30.8257
ENSMUST00000135377	Fip1l1	-0.779384	0.575494	1.94877	3.86044	3.59252	12.0631
ENSMUST00000069552	Gm5160	-2.11713	NA	2.43627	5.41239	4.07557	16.8605
ENSMUST00000154976	Ttc19	-0.0396045	NA	2.19976	4.59402	3.81983	14.1215
ENSMUST00000074272	Olfr591	-0.789568	0.497362	-3.73489	0.0751079	-2.13208	0.228129
ENSMUST00000186913	Ndufaf8	#VALUE!	NA	2.66827	6.35668	4.26761	19.261
ENSMUST00000154858	Orc3	-0.799341	NA	-4.4043	0.0472252	-2.81978	0.141632
ENSMUST00000127302	Git1	0.0343688	0.988622	-5.85503	0.0172767	-4.27806	0.0515437
ENSMUST00000186041	2010315B03Rik	-1.07176	0.421944	1.16414	2.24099	2.7191	6.5846
ENSMUST00000165885	Gm17023	-1.27585	NA	1.40315	2.64478	2.95609	7.7602
ENSMUST00000086236	Gm10180	-1.02997	0.402845	-3.25181	0.10498	-1.73015	0.301421
ENSMUST00000098864	Gm10689	-1.3809	NA	1.74457	3.35095	3.26522	9.61456
ENSMUST00000051453	Olfr730	-0.99003	0.247099	-4.32302	0.0499623	-2.80482	0.143109
ENSMUST00000181578	F420014N23Rik	0.118095	0.947767	-3.81036	0.07128	-2.29353	0.203975
ENSMUST00000188299	Gm28438	-2.16568	2.37095e-05	-6.33035	0.0124273	-4.81585	0.0355046
ENSMUST00000124325	Scrn1	-0.610116	0.682593	-4.08313	0.0590004	-2.57042	0.168355
ENSMUST00000183101	Ccdc74a	0.105291	0.952065	-4.93357	0.0327227	-3.42718	0.092964
ENSMUST00000127277	Trpm7	-0.482482	NA	-4.2724	0.0517465	-2.77854	0.145739
ENSMUST00000121689	Gm14766	-0.445925	0.748838	0.954355	1.93771	2.43191	5.39607
ENSMUST00000146010	Epb41l4aos	-0.790311	NA	2.18322	4.54166	3.65306	12.58
ENSMUST00000118692	Gm12090	0.107986	0.961341	-3.90155	0.0669137	-2.43423	0.185022
ENSMUST00000186247	Ank3	-0.0211248	0.976093	-4.79576	0.0360025	-3.33284	0.0992463
ENSMUST00000133852	Wnk3	-1.07399	0.414298	2.48263	5.58916	3.9418	15.3674
ENSMUST00000077208	Rps26-ps1	-0.305295	0.760781	-3.06945	0.119125	-1.62365	0.324513
ENSMUST00000140530	6330408A02Rik	#VALUE!	NA	3.14691	8.85758	4.58233	23.9562
ENSMUST00000126739	Hjurp	0.241888	0.666436	-4.43258	0.0463085	-3.01734	0.123506
ENSMUST00000119883	Gm7363	-0.0810174	0.949112	-3.46501	0.0905585	-2.05101	0.241315
ENSMUST00000145952	Zfp420	-0.948199	0.387783	1.65717	3.15397	3.0706	8.40125
ENSMUST00000146280	Cnot7	-0.614102	NA	3.26266	9.59749	4.67228	25.4974
ENSMUST00000137746	Cacnb2	-0.19093	0.778827	-5.4355	0.0231074	-4.02642	0.0613658
ENSMUST00000150749	2810408I11Rik	-1.2781	NA	2.07788	4.22187	3.46956	11.0775
ENSMUST00000137840	Gpr173	0.298945	0.892765	1.27522	2.42036	2.66078	6.32377
ENSMUST00000133893	Tbl1x	-0.428872	0.815959	-5.3412	0.0246683	-3.95606	0.0644327
ENSMUST00000185521	Phf3	-1.58044	NA	2.00566	4.01572	3.38134	10.4204
ENSMUST00000138407	Copa	-1.03096	0.541434	-4.67905	0.039036	-3.30384	0.101261
ENSMUST00000081987	Rpl36a-ps1	-0.266519	0.822132	-3.69818	0.0770437	-2.32965	0.198932
ENSMUST00000050128	Cfap74	-0.108938	NA	1.68518	3.21581	3.05037	8.28427
ENSMUST00000181932	B230322F03Rik	-0.743653	0.343776	1.48336	2.79599	2.84786	7.19934
ENSMUST00000167014	Snap91	-0.272376	0.893535	-3.30582	0.101123	-1.94645	0.259453
ENSMUST00000142157	Rundc3a	0.120722	NA	-3.67994	0.0780239	-2.33179	0.198638
ENSMUST00000151489	Ythdc1	-0.892044	0.270251	1.14153	2.20615	2.47697	5.56727
ENSMUST00000136918	Atp11a	#VALUE!	NA	3.4398	10.8513	4.76299	27.1521
ENSMUST00000059565	Olfr731	-1.3279	0.109978	-3.84804	0.0694425	-2.53542	0.17249
ENSMUST00000161921	Gm10125	-0.710806	0.568097	1.67337	3.18959	2.98142	7.89765
ENSMUST00000135399	Usp16	-0.967958	0.377793	-2.87663	0.13616	-1.57149	0.336461
ENSMUST00000153008	Edf1	0.0924058	NA	2.23565	4.70975	3.53759	11.6124
ENSMUST00000161226	Auts2	-0.619545	0.697853	2.17452	4.51437	3.46991	11.0802
ENSMUST00000139390	Nelfcd	-0.164708	NA	-3.70021	0.0769354	-2.43159	0.185361
ENSMUST00000116696	Gm24588	#VALUE!	NA	2.62935	6.18746	3.89674	14.8948
ENSMUST00000117559	Gm13215	-0.333275	0.678687	-3.63252	0.0806309	-2.36952	0.19351
ENSMUST00000131964	Cuedc1	-1.2349	NA	2.657	6.3072	3.91864	15.1226
ENSMUST00000152899	Otud5	-0.173093	0.916418	-5.45094	0.0228614	-4.19719	0.0545153
ENSMUST00000154056	Gm4997	0.638891	0.681101	-4.31169	0.0503561	-3.06193	0.119747
ENSMUST00000119198	Gm12219	-0.358647	0.775989	-6.16099	0.0139751	-4.91367	0.0331771
ENSMUST00000153920	Tom1l2	0.493048	NA	2.12708	4.36833	3.35763	10.2506
ENSMUST00000185489	Gm29228	#VALUE!	NA	2.78862	6.90968	4.01836	16.205
ENSMUST00000128870	Psmb6	-0.0707197	NA	2.25731	4.781	3.46893	11.0726
ENSMUST00000139943	Ift88	-0.993888	0.463173	-4.61487	0.0408119	-3.40461	0.0944297
ENSMUST00000190277	Gm28437	-1.04949	0.351141	-5.75528	0.0185135	-4.56044	0.042381
ENSMUST00000121320	Gm14303	-0.556888	0.473523	-2.66868	0.15727	-1.48317	0.357703
ENSMUST00000126341	Pafah1b1	-0.489798	0.77938	-3.46238	0.0907238	-2.28342	0.205411
ENSMUST00000153660	Ganc	-1.27619	0.358099	1.67658	3.1967	2.85498	7.23492
ENSMUST00000125488	Cry2	-0.228596	0.893803	-5.80592	0.0178749	-4.63089	0.0403611
ENSMUST00000149314	Kras	-0.538012	NA	2.45492	5.48283	3.62603	12.3465
ENSMUST00000123236	St6galnac2	-0.0506484	0.971672	-5.72136	0.0189539	-4.55825	0.0424454
ENSMUST00000142967	Surf1	#VALUE!	NA	3.60478	12.166	4.76713	27.2301
ENSMUST00000147512	Trp53	-0.381129	0.85967	-3.17365	0.110824	-2.01352	0.247668
ENSMUST00000140155	Rps16-ps2	-0.805747	0.336302	-2.50979	0.175581	-1.35513	0.3909
ENSMUST00000124356	Cwc25	-0.307813	NA	1.85887	3.62723	3.01225	8.06825
ENSMUST00000075147	Gm9770	-0.394181	0.804736	-4.1408	0.0566884	-2.99105	0.125778
ENSMUST00000149907	Copg1	-0.447968	0.720786	-4.50196	0.0441341	-3.37128	0.0966369
ENSMUST00000072316	Olfr1431	-1.61789	0.00134139	-3.52538	0.0868473	-2.40215	0.189182
ENSMUST00000084445	Gm10154	0.0985016	0.951116	-6.29853	0.0127044	-5.18132	0.0275593
ENSMUST00000124695	Il4i1	-0.613493	0.737696	-2.553	0.1704	-1.44241	0.367951
ENSMUST00000154706	Lnpk	-0.823043	0.426617	-3.39281	0.0952055	-2.28395	0.205335
ENSMUST00000179800	Sh3gl3	1.16433	NA	-3.37516	0.0963775	-2.26776	0.207652
ENSMUST00000156997	Dvl1	0.337929	NA	-3.15318	0.112408	-2.04949	0.241569
ENSMUST00000160969	Gm15795	-0.365336	0.828433	-3.52811	0.0866826	-2.4279	0.185836
ENSMUST00000150466	5330413P13Rik	-0.577681	0.600406	1.74353	3.34854	2.8402	7.16121
ENSMUST00000143821	A430018G15Rik	-0.614102	NA	3.59221	12.0604	4.68598	25.7406
ENSMUST00000124225	Osbpl2	0.498362	0.861911	-3.76196	0.073712	-2.66938	0.157195
ENSMUST00000185614	Kansl3	-0.69076	0.700281	-5.21587	0.0269071	-4.1252	0.0573048
ENSMUST00000118690	Gm12901	-1.33544	NA	3.28558	9.75119	4.36661	20.6291
ENSMUST00000184806	Tcf12	-0.871165	NA	1.32304	2.50192	2.40319	5.2897
ENSMUST00000165488	Gm4613	-0.326631	0.700281	-4.43492	0.0462334	-3.35656	0.0976278
ENSMUST00000149985	Msn	0.275546	0.84549	-6.29842	0.0127054	-5.22034	0.0268238
ENSMUST00000136511	Entpd5	-0.502864	0.716247	1.16921	2.24888	2.24097	4.72716
ENSMUST00000176741	Pkib	-0.983141	NA	1.582	2.99384	2.6422	6.24284
ENSMUST00000116473	Gm45753	0.0718794	NA	2.20997	4.62664	3.26715	9.6274
ENSMUST00000160783	Exoc6b	-1.53388	NA	2.14351	4.41835	3.19642	9.16682
ENSMUST00000127763	Gm15410	#VALUE!	NA	2.62542	6.17062	3.67493	12.7722
ENSMUST00000136288	Gm12144	0.292605	NA	1.73153	3.32081	2.77308	6.83564
ENSMUST00000189171	D130051D11Rik	-0.460435	0.805556	1.15491	2.22671	2.19373	4.57486
ENSMUST00000131882	Cpn1	0.37912	0.760781	-3.88957	0.0674719	-2.85575	0.138145
ENSMUST00000098161	Olfr677	-0.79584	0.661675	-2.71871	0.15191	-1.68516	0.310969
ENSMUST00000144239	Sf1	-0.103017	0.939768	-4.48054	0.0447945	-3.45115	0.0914326
ENSMUST00000174161	H2-T23	0.352012	NA	2.25638	4.77792	3.28548	9.75056
ENSMUST00000178117	Gm6728	0.138121	0.940811	-3.17478	0.110738	-2.15034	0.225259
ENSMUST00000118533	Gm15772	-0.947801	0.305094	-2.93396	0.130855	-1.90958	0.266169
ENSMUST00000129466	Tpm1	0.335995	0.86735	-3.86026	0.0688567	-2.83593	0.140056
ENSMUST00000143806	42801	-0.174737	0.915823	0.996706	1.99544	2.01992	4.05561
ENSMUST00000130974	Gnao1	-0.622107	NA	-4.05472	0.060174	-3.033	0.122173
ENSMUST00000118102	Gm8692	-0.344549	0.677753	-4.71244	0.0381429	-3.69292	0.0773252
ENSMUST00000119383	Rpl17-ps10	-0.212024	0.861581	-3.40351	0.0945022	-2.38426	0.191543
ENSMUST00000142997	Mbd3	#VALUE!	NA	3.16295	8.95657	4.16782	17.9738
ENSMUST00000129298	Inpp5k	-0.301753	0.76862	-5.87753	0.0170093	-4.87516	0.0340745
ENSMUST00000174683	Jarid2	-0.174056	0.935709	-3.36412	0.0971179	-2.36418	0.194227
ENSMUST00000191040	Rpsa-ps1	0.107186	NA	1.71994	3.29424	2.71736	6.57667
ENSMUST00000159363	4930581F22Rik	-0.342541	0.810882	-3.41227	0.0939297	-2.4174	0.187194
ENSMUST00000173221	Setd1b	-0.48567	NA	1.86411	3.64044	2.85325	7.22627
ENSMUST00000169150	Ylpm1	-0.961954	0.343106	2.01081	4.03008	2.99855	7.99195
ENSMUST00000120373	Gm13532	0.465938	0.554244	-4.13434	0.0569429	-3.14718	0.112877
ENSMUST00000111835	Styx	-0.34833	0.794793	-3.06311	0.11965	-2.08421	0.235825
ENSMUST00000187211	Faim	-0.781323	0.00874186	-1.92145	0.263989	-0.945545	0.519233
ENSMUST00000181536	Snhg18	-0.0826563	0.969832	1.34672	2.54333	2.319	4.98986
ENSMUST00000134617	Gm12254	-0.239086	0.728508	-3.6769	0.0781885	-2.72007	0.151767
ENSMUST00000140105	F730043M19Rik	0.224765	NA	1.54569	2.91944	2.50137	5.66223
ENSMUST00000133274	Gm15420	0.0796437	NA	1.74586	3.35396	2.69815	6.48971
ENSMUST00000162786	Exoc6b	0.180069	NA	1.97366	3.92764	2.92178	7.57781
ENSMUST00000138443	Bptf	-1.88145	NA	1.48063	2.79071	2.42715	5.37831
ENSMUST00000135488	Strbp	0.336303	NA	2.61738	6.13633	3.56259	11.8153
ENSMUST00000150926	Poldip3	-0.216299	NA	-4.22478	0.0534829	-3.2801	0.102942
ENSMUST00000177165	Frg2f1	-0.616562	0.6435	-3.57709	0.0837893	-2.6417	0.16024
ENSMUST00000162836	Gm7420	0.10606	0.954518	0.995121	1.99325	1.92571	3.79924
ENSMUST00000142980	Rps14	-1.18521	0.454328	-3.05734	0.120129	-2.12844	0.228705
ENSMUST00000156215	BC004004	0.451776	NA	2.08534	4.24376	3.01237	8.06888
ENSMUST00000119773	Rps12-ps19	0.635821	0.496445	-3.63855	0.0802945	-2.71333	0.152478
ENSMUST00000136372	Tmem151a	-0.36168	NA	-3.86054	0.0688433	-2.9379	0.130498
ENSMUST00000120833	Gm14414	-0.0368395	0.967538	-4.85689	0.0345089	-3.93536	0.0653641
ENSMUST00000140518	Vps45	-0.614102	NA	3.78566	13.791	4.70629	26.1056
ENSMUST00000182265	Gm26944	-0.428541	0.68547	-3.69517	0.0772048	-2.77533	0.146064
ENSMUST00000118311	Gm11810	0.520954	0.726312	-3.92598	0.0657904	-3.00719	0.124378
ENSMUST00000104889	Olfr1288	-0.93076	0.365475	1.42287	2.68119	2.34064	5.06529
ENSMUST00000187500	Sf3b1	-0.982783	0.173231	-3.00178	0.124846	-2.08483	0.235724
ENSMUST00000176633	Traf7	0.140581	0.954518	-4.1869	0.0549058	-3.27435	0.103353
ENSMUST00000179549	Ccdc85b	-0.352896	0.20273	0.463192	1.37859	1.37544	2.59447
ENSMUST00000182346	Gm9081	-2.09146	NA	2.43284	5.39954	3.34396	10.1539
ENSMUST00000071842	Gm5828	-0.156307	0.932854	-4.2505	0.0525379	-3.33954	0.0987866
ENSMUST00000184578	Hnrnpll	-1.01382	0.314342	-3.64698	0.0798272	-2.74044	0.14964
ENSMUST00000075704	Olfr469	-0.919139	0.0772459	-2.4765	0.17968	-1.5759	0.335433
ENSMUST00000122170	Gm12338	-0.74789	0.317106	-1.99932	0.250119	-1.10094	0.466213
ENSMUST00000136051	Gm11423	-1.20567	NA	1.39312	2.62647	2.28955	4.88902
ENSMUST00000157668	Gm26411	-0.339273	0.719683	-6.11495	0.0144283	-5.21895	0.0268496
ENSMUST00000143857	Gm14022	-0.607048	0.385148	-2.76937	0.146668	-1.87416	0.272786
ENSMUST00000152560	Cyp2s1	-0.0468613	0.978945	-5.0453	0.0302841	-4.15072	0.0562999
ENSMUST00000134549	Ddx47	-0.0343888	NA	-4.0171	0.0617636	-3.12691	0.114473
ENSMUST00000118781	Gm11826	-0.0940279	0.959178	-3.36492	0.0970637	-2.47556	0.179797
ENSMUST00000162697	AI480526	-1.01414	NA	1.9595	3.88927	2.84479	7.18403
ENSMUST00000156723	Gps1	#VALUE!	NA	3.34073	10.1312	4.21617	18.5864
ENSMUST00000141882	9430015G10Rik	0.719969	0.665364	-4.11121	0.0578634	-3.23608	0.106131
ENSMUST00000128137	Kcna6	-0.67964	NA	2.74509	6.70433	3.61834	12.2809
ENSMUST00000151545	Epn2	-0.10237	NA	-3.9957	0.0626864	-3.12412	0.114696
ENSMUST00000085163	Gm10263	0.529872	NA	2.31924	4.99069	3.18994	9.12573
ENSMUST00000058118	Olfr435	-0.77294	0.458546	-3.45314	0.0913064	-2.58299	0.166894
ENSMUST00000151537	Hnrnph1	-1.74298	NA	1.78357	3.44276	2.65217	6.28611
ENSMUST00000156565	Lpin2	-0.328465	NA	-4.84856	0.0347086	-3.98296	0.0632426
ENSMUST00000117129	Pgam1-ps2	-0.316615	0.764585	-4.88357	0.0338766	-4.02795	0.0613006
ENSMUST00000181382	D230017M19Rik	-0.227276	0.829628	0.789879	1.72893	1.64485	3.12716
ENSMUST00000072219	Olfr1480	-1.23062	0.420171	1.0318	2.04457	1.88471	3.69278
ENSMUST00000166951	Gm17055	0.921088	0.210119	-1.86975	0.273621	-1.02449	0.491584
ENSMUST00000168495	Rb1	-1.18913	NA	-4.11113	0.0578663	-3.26714	0.103871
ENSMUST00000120155	Gm13320	0.335205	NA	-4.50425	0.0440642	-3.66072	0.0790704
ENSMUST00000117563	Gm9385	-0.320568	0.723541	-2.29203	0.204188	-1.44945	0.366161
ENSMUST00000119907	Gm11966	#VALUE!	NA	3.2024	9.2049	4.04064	16.4572
ENSMUST00000080313	Olfr777	-1.23945	0.0400021	-4.13405	0.0569544	-3.2981	0.101665
ENSMUST00000118708	Gm13453	-0.154356	0.867744	-2.13466	0.227721	-1.29954	0.406255
ENSMUST00000086918	Gm5560	-1.16994	0.0887862	-2.43243	0.185254	-1.60647	0.328401
ENSMUST00000138020	Cpm	-0.568389	NA	2.7008	6.50161	3.52653	11.5237
ENSMUST00000127426	Pomgnt1	-0.329204	0.885997	-3.51982	0.0871824	-2.70216	0.153663
ENSMUST00000144587	Rab11fip3	-0.32231	NA	-4.02937	0.0612405	-3.22516	0.106938
ENSMUST00000180590	Gm26599	0.128013	0.936685	-3.23227	0.106412	-2.42811	0.185809
ENSMUST00000162336	Rrp15	-0.0750746	NA	-3.29369	0.101977	-2.49306	0.177629
ENSMUST00000187714	Gm28439	-0.501922	0.552379	-6.87741	0.00850539	-6.09002	0.0146798
ENSMUST00000139860	Plgrkt	-0.188712	NA	-3.08054	0.118213	-2.29372	0.203949
ENSMUST00000136222	Sec14l4	-0.385507	NA	-4.50588	0.0440145	-3.72338	0.0757098
ENSMUST00000144450	Ccdc88a	-1.54375	NA	3.31653	9.96264	4.09391	17.0762
ENSMUST00000121643	Gm7618	-0.0444956	0.974008	-3.89468	0.0672332	-3.11766	0.11521
ENSMUST00000144992	Ybx1	-0.41755	0.804736	-3.0185	0.123408	-2.24201	0.211392
ENSMUST00000117717	Gm14094	-1.33544	NA	3.75007	13.455	4.52552	23.0312
ENSMUST00000150227	Adarb1	-0.473673	0.769533	-2.92258	0.131891	-2.15044	0.225244
ENSMUST00000159261	Pvr	-0.35439	0.844903	1.43242	2.69899	2.20354	4.60608
ENSMUST00000136336	Arsg	0.534276	NA	-3.32847	0.0995474	-2.56034	0.169536
ENSMUST00000162801	Manf	-0.949204	NA	1.51609	2.86014	2.28168	4.86243
ENSMUST00000176645	Evi5l	-0.950677	NA	1.97355	3.92733	2.73679	6.66586
ENSMUST00000152298	Ppp1r35	#VALUE!	NA	3.87476	14.6696	4.63415	24.8325
ENSMUST00000183980	Lrrc1	-0.339867	0.703442	1.36368	2.57341	2.122	4.35296
ENSMUST00000155850	Hhip	-0.614102	NA	3.91205	15.0537	4.66553	25.3785
ENSMUST00000184247	Rpl15-ps2	-0.959049	0.269883	-2.25849	0.208991	-1.50722	0.351789
ENSMUST00000138544	Tmem165	-0.24128	NA	-3.66562	0.0788022	-2.9182	0.132292
ENSMUST00000126959	Srrm4os	0.522436	NA	-3.40796	0.0942114	-2.66055	0.158159
ENSMUST00000149696	Gm15585	-0.161725	0.925154	-4.82075	0.0353841	-4.07356	0.059393
ENSMUST00000057740	Rpsa-ps10	-0.263766	0.693891	-2.493	0.177637	-1.7461	0.298106
ENSMUST00000176016	AA465934	0.679648	NA	4.10624	17.2227	4.85308	28.9017
ENSMUST00000121760	Gm5863	-1.84595	NA	2.49432	5.63464	3.23822	9.43628
ENSMUST00000072290	Olfr889	0.166665	0.918562	-3.41833	0.0935361	-2.67647	0.156424
ENSMUST00000122886	Gas2l1	0.0409628	0.979499	1.31863	2.4943	2.05708	4.16144
ENSMUST00000149653	Mapk8ip1	0.227553	0.701925	-4.31282	0.0503165	-3.5745	0.0839399
ENSMUST00000118644	Gm8662	#VALUE!	NA	2.94521	7.70186	3.68156	12.831
ENSMUST00000143182	Tmem87a	-0.700456	NA	-3.24822	0.105242	-2.51419	0.175047
ENSMUST00000140099	Rplp2	-0.566598	NA	-3.18696	0.109807	-2.45602	0.182248
ENSMUST00000135762	Atg4b	0.0213967	0.991186	-5.48295	0.0223597	-4.75253	0.0370977
ENSMUST00000136685	Sec61b	-0.583645	NA	-3.46431	0.0906024	-2.73422	0.150286
ENSMUST00000183540	Mir7013	-0.0283249	NA	2.12612	4.36543	2.8527	7.22353
ENSMUST00000128065	Usp48	0.384417	NA	-3.09721	0.116855	-2.37253	0.193106
ENSMUST00000071559	Olfr765	-0.768645	0.473523	-3.24886	0.105195	-2.52544	0.173686
ENSMUST00000151894	Pfkp	0.00341827	0.998996	-4.62221	0.0406048	-3.89944	0.0670117
ENSMUST00000164385	Ptbp1	0.169406	NA	-2.96793	0.12781	-2.24792	0.210528
ENSMUST00000154798	2810433D01Rik	0.777494	NA	2.57069	5.94094	3.28927	9.77615
ENSMUST00000116924	Mir466i	-1.19162	NA	2.12424	4.35973	2.83825	7.15152
ENSMUST00000182065	Rbm4b	-0.663474	0.309272	0.83135	1.77935	1.54393	2.91587
ENSMUST00000170338	Gm8451	-0.247664	0.750639	-4.58641	0.041625	-3.87682	0.068071
ENSMUST00000153431	1700007J10Rik	0.795262	NA	-4.21051	0.0540147	-3.50109	0.0883217
ENSMUST00000097163	Olfr775	-1.26584	0.100157	-2.45321	0.182604	-1.74476	0.298384
ENSMUST00000121934	Gm14017	-1.35245	NA	1.68994	3.22643	2.3983	5.27182
ENSMUST00000154389	Hdac11	0.357079	0.780566	-2.58581	0.166569	-1.87777	0.272103
ENSMUST00000150725	Smarcal1	-0.429126	NA	-3.28324	0.102718	-2.57615	0.167687
ENSMUST00000183332	Rbm4b	-0.572881	0.381539	-1.94355	0.259976	-1.23975	0.423446
ENSMUST00000137510	Ube2d-ps	-0.467975	0.549121	0.790849	1.73009	1.49409	2.81687
ENSMUST00000171662	Gm9613	-0.446925	NA	-3.68937	0.0775155	-2.98802	0.126043
ENSMUST00000169699	Ccdc129	0.537944	NA	2.64465	6.25343	3.34421	10.1556
ENSMUST00000121430	Gm12715	-1.28636	0.0438388	-2.65218	0.159079	-1.9532	0.258243
ENSMUST00000102523	Olfr393	-0.623143	0.258315	-2.23016	0.213135	-1.5317	0.345871
ENSMUST00000179614	Ccdc162	-0.204114	NA	-3.06903	0.11916	-2.3718	0.193205
ENSMUST00000140128	Hook1	-0.492226	NA	-3.96605	0.0639884	-3.26952	0.103699
ENSMUST00000137961	Cstf3	-1.12393	NA	1.93184	3.81543	2.62702	6.17747
ENSMUST00000185535	Gm7160	0.592027	NA	1.88837	3.70216	2.58319	5.99264
ENSMUST00000123174	Atrx	-0.831988	NA	2.10722	4.30861	2.8014	6.97116
ENSMUST00000181614	E030030I06Rik	0.497406	NA	2.06508	4.18457	2.75878	6.76825
ENSMUST00000119571	Gm14586	-0.388395	0.638553	-1.91635	0.264924	-1.22294	0.42841
ENSMUST00000191150	2310035C23Rik	0.702821	NA	3.0983	8.56406	3.78775	13.811
ENSMUST00000130897	Atp5sl	-0.211814	0.910056	-4.01906	0.0616796	-3.33223	0.0992883
ENSMUST00000078766	Rps27a-ps2	-0.507683	0.629792	-2.81336	0.142264	-2.1266	0.228996
ENSMUST00000124467	Setd5	-0.319328	NA	-4.16821	0.0556216	-3.48162	0.0895214
ENSMUST00000179668	Gm10736	-0.518494	0.431044	-2.43519	0.184899	-1.74872	0.297566
ENSMUST00000175032	Rn7s2	-0.788352	0.738692	-4.16317	0.0558161	-3.4771	0.0898024
ENSMUST00000133597	Ccnc	-1.405	NA	-4.02902	0.0612555	-3.34436	0.0984571
ENSMUST00000148422	Tspoap1	0.231829	0.820944	-5.17999	0.0275847	-4.4957	0.0443261
ENSMUST00000133090	Srsf11	0.0177796	0.986137	-4.6942	0.0386282	-4.01211	0.0619777
ENSMUST00000078932	Olfr1393	-0.304773	0.884005	-3.02875	0.122533	-2.34778	0.196448
ENSMUST00000169692	Gm6970	-0.424878	0.661037	-5.08785	0.0294039	-4.41279	0.0469482
ENSMUST00000096203	Olfr1471	-1.34784	0.0772459	-2.57786	0.167489	-1.90756	0.266543
ENSMUST00000128392	Slc22a23	-1.3824	NA	-3.91326	0.0663731	-3.24993	0.105117
ENSMUST00000135601	AI314180	-0.223926	NA	-3.55169	0.0852777	-2.8885	0.135043
ENSMUST00000128130	Rexo4	-0.309522	0.866395	-2.66597	0.157567	-2.00539	0.249068
ENSMUST00000179687	Brd2	1.0392	0.417015	-4.01453	0.0618735	-3.35549	0.0977002
ENSMUST00000121046	Tpt1-ps3	-0.557694	0.387176	-2.9887	0.125983	-2.32989	0.198899
ENSMUST00000127723	Leng8	0.016187	0.995441	-5.45255	0.022836	-4.79494	0.0360228
ENSMUST00000134684	Rnf43	-0.43474	0.596938	-5.33808	0.0247216	-4.68206	0.0389547
ENSMUST00000190924	Pgm3	#VALUE!	NA	3.04122	8.23189	3.69562	12.9567
ENSMUST00000146961	Arl14ep	-0.316895	0.864255	-2.41009	0.188144	-1.75573	0.296124
ENSMUST00000166691	Sel1l	-0.989778	NA	-3.81595	0.0710044	-3.16173	0.111744
ENSMUST00000128678	Sppl3	0.403766	NA	-2.85396	0.138316	-2.2029	0.217201
ENSMUST00000144378	N4bp2l2	-0.506779	0.770759	-3.1569	0.112119	-2.5063	0.176007
ENSMUST00000161386	Nwd1	0.374358	0.812507	-5.28774	0.0255996	-4.63797	0.0401635
ENSMUST00000150206	Rabl6	0.105814	0.942086	-4.52938	0.0433032	-3.8806	0.0678927
ENSMUST00000159636	Pip5k1c	-0.54129	NA	-4.24076	0.0528936	-3.59278	0.0828828
ENSMUST00000128522	5430419D17Rik	-0.171294	NA	2.26639	4.81118	2.91394	7.53672
ENSMUST00000125122	Zzef1	0.00278613	0.998996	-4.94501	0.032464	-4.30017	0.0507598
ENSMUST00000064582	Olfr851	-0.636986	0.506909	-4.71271	0.0381359	-4.06862	0.0595969
ENSMUST00000173204	Brd2	0.750842	0.359806	-2.57144	0.168236	-1.93017	0.262399
ENSMUST00000175416	Mir3098	0.630765	NA	2.45001	5.46418	3.08887	8.50832
ENSMUST00000097164	Olfr774	-0.963646	0.571289	-3.45019	0.0914932	-2.81134	0.142463
ENSMUST00000150613	Gm15545	#VALUE!	NA	3.39342	10.508	4.03093	16.3467
ENSMUST00000180601	9230114K14Rik	-0.273061	0.589714	-1.6485	0.318971	-1.013	0.495515
ENSMUST00000122422	Rpl19-ps11	-0.723793	0.338373	-1.74549	0.298232	-1.11072	0.463062
ENSMUST00000138210	1700013F07Rik	-0.481401	0.719015	-3.96567	0.064005	-3.33125	0.0993558
ENSMUST00000155565	Ift122	0.211292	0.919658	-3.44826	0.0916155	-2.81639	0.141965
ENSMUST00000154986	Myo5b	-0.68904	NA	-3.98551	0.063131	-3.35388	0.0978099
ENSMUST00000188485	Gm29650	0.0657301	0.971688	1.24678	2.37311	1.87809	3.67588
ENSMUST00000149522	Kyat1	0.361427	0.886507	-3.25448	0.104786	-2.62764	0.161809
ENSMUST00000161366	Gm16055	0.336672	NA	3.31387	9.94429	3.93653	15.3113
ENSMUST00000084614	Gm10288	-0.348391	0.600293	-3.06982	0.119095	-2.44766	0.183308
ENSMUST00000144037	Syf2	-0.259762	0.913863	-3.11982	0.115038	-2.4983	0.176985
ENSMUST00000178830	Gm21378	-0.120312	NA	-4.71972	0.0379509	-4.09915	0.0583491
ENSMUST00000085711	Gm5121	0.304769	NA	2.45456	5.48147	3.07388	8.42033
ENSMUST00000056795	Olfr984	-1.38962	0.00105171	-2.23721	0.212096	-1.61939	0.325474
ENSMUST00000058907	Olfr466	-0.628314	0.449095	-2.18744	0.219541	-1.57505	0.335631
ENSMUST00000139578	Cops5	0.237885	0.900564	-3.2624	0.104213	-2.65048	0.159267
ENSMUST00000142141	Ggnbp1	1.54825	NA	2.42989	5.38851	3.04146	8.23326
ENSMUST00000082402	mt-Co1	-0.716888	0.216612	-2.65556	0.158707	-2.04762	0.241882
ENSMUST00000125869	Gm13524	-0.121779	0.944071	-2.0808	0.236383	-1.47296	0.360242
ENSMUST00000129364	Zfp335os	-0.501748	0.564666	0.651833	1.57116	1.25954	2.39419
ENSMUST00000149658	Cstf2	-0.451916	0.764585	-3.7664	0.0734851	-3.15882	0.11197
ENSMUST00000159052	Cacna1h	-0.371842	0.438425	0.615975	1.53259	1.22115	2.33133
ENSMUST00000190960	Nmnat2	-0.422184	0.738621	-2.50095	0.17666	-1.89628	0.268636
ENSMUST00000135020	Eif4a2	-1.18344	NA	-3.88158	0.0678468	-3.27742	0.103133
ENSMUST00000189941	Gm10925	-1.20812	0.287912	-5.104	0.0290765	-4.5012	0.0441573
ENSMUST00000141835	Spag6l	-0.53672	0.416536	1.01876	2.02618	1.62101	3.0759
ENSMUST00000051563	Olfr728	-0.970478	0.0367263	-2.48686	0.178395	-1.88583	0.270587
ENSMUST00000191186	5031425E22Rik	0.0959015	0.898842	0.74617	1.67733	1.34664	2.54318
ENSMUST00000141072	Setd5	0.236838	NA	2.31432	4.97369	2.9121	7.52711
ENSMUST00000160779	Coq9	-0.0277451	0.983779	-5.07629	0.0296403	-4.48072	0.0447888
ENSMUST00000179820	Rbm4	-0.531626	0.205697	1.35445	2.55699	1.94705	3.85586
ENSMUST00000189404	Gm28151	-0.162599	0.746355	1.8995	3.73084	2.48553	5.60042
ENSMUST00000148699	Gm15567	-0.224819	0.906874	-2.46048	0.181686	-1.87535	0.272561
ENSMUST00000190683	1700120C14Rik	-0.370245	0.354212	0.82208	1.76795	1.40441	2.6471
ENSMUST00000151499	Poldip2	0.138425	NA	-2.68986	0.154979	-2.10785	0.231993
ENSMUST00000156436	Ctcf	0.0593785	0.979444	-2.44021	0.184256	-1.85949	0.275575
ENSMUST00000156161	Trmt13	-0.935648	0.454531	-5.13599	0.028439	-4.56048	0.0423796
ENSMUST00000117623	Gm12469	-0.00371267	NA	-4.38952	0.0477114	-3.82058	0.0707769
ENSMUST00000170959	Kif5b	-0.060638	0.961051	-2.53495	0.172546	-1.96711	0.255766
ENSMUST00000119851	Gm14111	-0.637592	0.406943	-2.44319	0.183876	-1.87688	0.272272
ENSMUST00000082414	mt-Nd4	-0.71331	0.220045	-2.08588	0.235553	-1.52108	0.348425
ENSMUST00000155264	Pex5l	-0.0722633	0.974008	1.05428	2.07668	1.61831	3.07016
ENSMUST00000119738	Gm12335	0.282828	0.756528	-5.2565	0.0261599	-4.69268	0.0386691
ENSMUST00000117487	Gm13202	-0.367337	0.520142	-3.82605	0.0705091	-3.26551	0.103988
ENSMUST00000144926	A330035P11Rik	-0.44862	0.665992	1.17559	2.25885	1.73597	3.33103
ENSMUST00000092015	Nol4	-0.0980123	NA	3.37876	10.4018	3.93835	15.3307
ENSMUST00000081180	Cox5b	-0.557158	0.23516	-1.55965	0.339232	-1.00021	0.499926
ENSMUST00000143491	Arhgap21	-0.849846	NA	-4.30412	0.0506211	-3.74592	0.0745362
ENSMUST00000120762	Gm8172	-0.163986	0.903984	-2.82352	0.141266	-2.26598	0.207909
ENSMUST00000148384	Hjurp	-0.24987	0.86738	-4.1001	0.0583104	-3.54328	0.0857758
ENSMUST00000180869	A430105J06Rik	-0.682747	0.345017	-1.96887	0.255453	-1.41287	0.375564
ENSMUST00000087824	Olfr1428	-1.13335	0.000761337	-1.38509	0.382866	-0.829306	0.5628
ENSMUST00000182159	Safb	-0.385943	0.817848	-2.56142	0.169409	-2.00634	0.248903
ENSMUST00000130005	Rpl21-ps8	-0.363624	0.738867	-1.71163	0.305315	-1.15721	0.448379
ENSMUST00000135128	Tlk1	0.46557	NA	-2.76439	0.147175	-2.2123	0.21579
ENSMUST00000104892	Olfr1196	-1.74614	0.000200423	-4.34756	0.0491194	-3.79649	0.0719687
ENSMUST00000145747	Fnbp4	0.29543	NA	-2.74534	0.149132	-2.19523	0.218359
ENSMUST00000129557	Med1	-0.802488	0.612819	1.22767	2.34189	1.77742	3.42813
ENSMUST00000124421	Fbxl5	0.384857	NA	-2.94893	0.129504	-2.40074	0.189367
ENSMUST00000075809	Gm5576	-0.501042	NA	2.25169	4.76241	2.79767	6.95316
ENSMUST00000063289	Olfr284	-0.585287	NA	-4.23227	0.0532058	-3.68849	0.077563
ENSMUST00000152503	Odf2	0.240049	0.904556	-3.14579	0.112985	-2.60255	0.164648
ENSMUST00000153095	Gm15351	-0.149149	0.894593	-2.19533	0.218343	-1.65613	0.31729
ENSMUST00000125695	Gnao1	-0.102399	0.903215	-4.35111	0.0489987	-3.81209	0.0711945
ENSMUST00000188976	Snhg14	-0.51145	0.770543	1.34043	2.53226	1.8793	3.67896
ENSMUST00000184382	Mir8112	-0.512946	0.611043	-2.41055	0.188085	-1.87253	0.273094
ENSMUST00000165187	Slc25a23	0.357694	0.807613	-3.80441	0.0715746	-3.27141	0.103564
ENSMUST00000143349	Caprin1	-0.58669	0.583518	2.35933	5.1313	2.89096	7.41762
ENSMUST00000138426	Gm12953	0.0111392	NA	2.2611	4.79356	2.79202	6.92597
ENSMUST00000124131	Acp2	-0.0866485	0.946921	-4.678	0.0390644	-4.14866	0.0563804
ENSMUST00000139857	Atp6v0a1	-0.208038	0.915823	-5.08714	0.0294183	-4.55825	0.0424453
ENSMUST00000133122	Bola3	-0.771861	0.525836	-3.44113	0.0920696	-2.91709	0.132394
ENSMUST00000124621	Zfr	-1.22895	NA	2.38232	5.21373	2.90635	7.49719
ENSMUST00000128929	Gale	0.0820823	NA	-2.83626	0.140023	-2.31696	0.20069
ENSMUST00000162241	Tbce	-0.965247	NA	-3.1717	0.110974	-2.65364	0.158919
ENSMUST00000143998	Setd5	-0.611328	0.406943	1.55139	2.93099	2.06702	4.1902
ENSMUST00000181739	4930556M19Rik	0.45041	NA	2.2476	4.74894	2.76214	6.784
ENSMUST00000148508	Cops9	0.253569	0.823319	0.971167	1.96043	1.48413	2.79748
ENSMUST00000056120	Olfr1336	0.315673	0.69866	-4.15902	0.055977	-3.6467	0.0798424
ENSMUST00000134528	Nfrkb	-0.153712	NA	-4.04714	0.060491	-3.53728	0.0861333
ENSMUST00000148478	Gm15535	-0.227261	0.797256	-2.28931	0.204573	-1.77972	0.291239
ENSMUST00000181939	Gm26559	0.205964	0.750431	-1.44288	0.367833	-0.933653	0.523531
ENSMUST00000117430	Rps15a-ps7	0.0516873	0.971672	-2.62322	0.162305	-2.11551	0.230764
ENSMUST00000183109	Anks1b	-1.00961	NA	1.26121	2.39696	1.76528	3.39941
ENSMUST00000150145	4921531C22Rik	-0.129547	0.865274	-1.58718	0.332822	-1.08342	0.471909
ENSMUST00000144810	Ccnl1	-0.160865	NA	-3.42954	0.092812	-2.92634	0.131548
ENSMUST00000123313	Dctn1	0.13093	0.938326	-5.15134	0.028138	-4.64952	0.0398433
ENSMUST00000123309	Cdh23	-0.264652	0.868135	-3.41885	0.0935025	-2.91709	0.132394
ENSMUST00000185221	2310034O05Rik	0.344131	0.642191	1.81224	3.51188	2.3127	4.96812
ENSMUST00000122963	4933427G23Rik	-0.64522	NA	2.36291	5.14405	2.85966	7.25846
ENSMUST00000082421	mt-Cytb	-0.695394	0.224694	-2.44178	0.184057	-1.94503	0.259709
ENSMUST00000187764	Gm29156	-0.464501	0.789008	1.04561	2.06424	1.54108	2.91011
ENSMUST00000134807	Utp18	-0.298822	NA	-3.40044	0.0947036	-2.90546	0.133465
ENSMUST00000181664	Snhg4	0.712669	NA	2.01454	4.04051	2.50863	5.6908
ENSMUST00000181873	5430416N02Rik	0.560773	NA	1.92359	3.79366	2.41649	5.33872
ENSMUST00000156014	42802	0.22328	0.90009	-4.76733	0.036719	-4.27499	0.0516535
ENSMUST00000156561	D230025D16Rik	-0.0280357	0.992841	-3.62015	0.0813256	-3.1287	0.114332
ENSMUST00000164617	Nisch	0.596316	NA	1.96522	3.90472	2.45356	5.47765
ENSMUST00000076514	Olfr51	-0.0719085	NA	-3.24287	0.105633	-2.75468	0.14817
ENSMUST00000190541	4930579K19Rik	-0.365307	NA	1.60171	3.03504	2.08867	4.25356
ENSMUST00000188519	Gm7160	-0.0536281	0.958422	0.705855	1.63111	1.19234	2.28523
ENSMUST00000191026	Serpine2	-0.375466	0.490215	-2.83426	0.140218	-2.34783	0.196441
ENSMUST00000147028	Lrpap1	0.111976	NA	-3.58759	0.0831818	-3.10186	0.116479
ENSMUST00000188598	Tgfbrap1	-0.305544	0.878618	-5.2512	0.0262561	-4.7661	0.0367503
ENSMUST00000180652	Gm26725	0.797629	NA	2.81532	7.03877	3.30042	9.85202
ENSMUST00000120962	Gm13310	-0.525388	NA	-4.99819	0.0312893	-4.51334	0.0437875
ENSMUST00000125459	2610507B11Rik	-0.085641	NA	-3.25922	0.104442	-2.7745	0.146148
ENSMUST00000058103	Gm5436	0.234759	0.704205	-1.57245	0.336237	-1.0884	0.470283
ENSMUST00000126476	3300002A11Rik	-0.240865	0.754441	-1.69186	0.309527	-1.20833	0.432769
ENSMUST00000131456	Serping1	-0.755788	0.594976	-4.73287	0.0376066	-4.24986	0.0525613
ENSMUST00000153524	Calm1	0.0942453	0.949112	-4.96888	0.0319315	-4.48599	0.0446255
ENSMUST00000085368	Gm5786	-0.841044	NA	1.83482	3.56727	2.31601	4.97952
ENSMUST00000082392	mt-Nd1	-0.674528	0.232553	-2.11752	0.230443	-1.63648	0.32164
ENSMUST00000126676	Gusb	-0.32669	NA	1.73873	3.33742	2.21712	4.64963
ENSMUST00000144284	Serac1	-0.629749	0.772003	1.53624	2.90037	2.00896	4.02493
ENSMUST00000156214	BC017643	-0.979376	NA	-4.29153	0.0510647	-3.81885	0.0708616
ENSMUST00000139744	Porcn	-0.133443	NA	-3.96984	0.0638204	-3.49725	0.0885571
ENSMUST00000183580	Kirrel3	-0.0407401	0.977454	1.57162	2.97239	2.04419	4.1244
ENSMUST00000143326	Hook1	-1.04691	NA	-3.75031	0.0743092	-3.27806	0.103088
ENSMUST00000138284	Tada1	-0.113832	0.945313	-2.67919	0.156129	-2.20709	0.216571
ENSMUST00000081993	Gm10020	-1.01899	0.147636	-1.96669	0.25584	-1.49489	0.354809
ENSMUST00000159206	Rb1cc1	-1.25786	NA	2.13942	4.40584	2.61061	6.1076
ENSMUST00000171853	D030025P21Rik	-0.091383	0.944115	0.869338	1.82682	1.33991	2.53136
ENSMUST00000142047	Gm11240	0.107237	NA	2.84389	7.17954	3.31034	9.92002
ENSMUST00000107229	Pip5k1a	0.339886	0.865487	1.55894	2.94638	2.02378	4.06647
ENSMUST00000151811	Dnah2	-0.387337	0.850026	1.85122	3.60805	2.31472	4.97508
ENSMUST00000162724	Gm16299	0.375862	0.794511	-3.36662	0.0969499	-2.90313	0.133681
ENSMUST00000131046	Rab37	-0.658386	NA	-3.13234	0.114044	-2.67053	0.157069
ENSMUST00000133141	Osbpl3	-0.505588	0.650628	-4.47686	0.0449088	-4.01652	0.0617884
ENSMUST00000179683	Gm20091	-0.299351	0.878618	-4.14478	0.0565325	-3.68471	0.0777661
ENSMUST00000140487	Herc1	-1.20349	NA	2.14409	4.42015	2.60399	6.07965
ENSMUST00000126178	Dusp1	-0.544903	0.754577	-2.99159	0.125731	-2.5339	0.172671
ENSMUST00000128772	2410089E03Rik	-0.400205	0.829419	-1.78524	0.290129	-1.32916	0.398
ENSMUST00000144683	Ndufs3	-0.489145	0.664901	-2.81146	0.142451	-2.36343	0.194328
ENSMUST00000142491	Uckl1	-0.116875	0.95014	-5.29803	0.0254175	-4.85012	0.0346713
ENSMUST00000089501	Gm5879	-0.108149	0.907788	-3.23305	0.106354	-2.78684	0.144903
ENSMUST00000181258	Gm26811	1.08559	0.223009	-4.44924	0.0457769	-4.00314	0.0623643
ENSMUST00000188560	Gm28528	-0.614102	NA	3.02954	8.16548	3.47473	11.1173
ENSMUST00000118577	Gm16418	-0.0443271	0.97844	-3.16119	0.111786	-2.71878	0.151902
ENSMUST00000078217	Olfr312	-0.36547	0.8436	-2.85845	0.137886	-2.41661	0.187295
ENSMUST00000117045	Dynlt1-ps1	-1.1204	0.18583	-2.1801	0.220661	-1.74097	0.299167
ENSMUST00000153631	Atg13	-1.18822	NA	-3.71553	0.0761226	-3.27742	0.103133
ENSMUST00000175726	9930021J03Rik	-0.114254	0.913863	1.80735	3.5	2.24532	4.74142
ENSMUST00000169182	Gm3756	0.0792663	0.982931	-2.85254	0.138452	-2.41483	0.187527
ENSMUST00000127547	Nkiras2	-0.0463495	NA	-4.28464	0.0513092	-3.84961	0.0693667
ENSMUST00000122882	2210406O10Rik	-0.467043	NA	1.40126	2.64132	1.83478	3.56717
ENSMUST00000099863	Olfr1109	-1.05459	0.268079	-2.81571	0.142033	-2.38441	0.191523
ENSMUST00000129264	Med31	0.0439116	0.987075	-3.39608	0.09499	-2.96502	0.128068
ENSMUST00000131463	Txlng	-0.300825	NA	-3.75365	0.0741374	-3.32429	0.0998368
ENSMUST00000188138	Gm29543	-0.0429985	0.956947	0.91317	1.88318	1.34192	2.53488
ENSMUST00000080094	Olfr1301	-0.75084	0.192964	0.697686	1.6219	1.12619	2.18282
ENSMUST00000132590	Rad18	-0.283439	0.869481	1.00248	2.00345	1.4297	2.69391
ENSMUST00000170577	Erlin1	-0.220829	0.885332	1.14324	2.20876	1.56964	2.9683
ENSMUST00000185480	Gm20342	0.112565	0.853069	0.880145	1.84056	1.30646	2.47334
ENSMUST00000137014	Adam19	-0.121026	0.955684	-4.62485	0.0405304	-4.19909	0.0544436
ENSMUST00000120658	Gm13622	0.236279	0.892363	-3.5214	0.0870867	-3.09758	0.116825
ENSMUST00000135039	Htt	-0.403274	NA	-3.52134	0.0870906	-3.09943	0.116675
ENSMUST00000181839	2310069G16Rik	0.0839081	0.967245	1.51731	2.86256	1.93917	3.83485
ENSMUST00000143231	Prpf31	-0.837365	0.173482	0.627376	1.54475	1.03912	2.05498
ENSMUST00000153936	Wipi2	0.120047	0.942069	-6.11362	0.0144416	-5.70254	0.0192027
ENSMUST00000094541	Btbd8	-0.338043	0.710778	-3.38877	0.0954728	-2.97854	0.126873
ENSMUST00000134291	Hnrnpu	-0.780505	0.57148	-2.41476	0.187535	-2.00476	0.249177
ENSMUST00000133909	Copa	0.304154	0.828801	-4.70166	0.038429	-4.29194	0.0510501
ENSMUST00000129689	Sec14l4	-0.985398	NA	-3.64458	0.0799597	-3.23687	0.106073
ENSMUST00000123548	Gm13205	-0.339308	0.750639	0.738533	1.66848	1.14515	2.2117
ENSMUST00000054541	Olfr1325	-1.41571	0.0248467	-3.14921	0.112718	-2.74351	0.149321
ENSMUST00000138973	Rpl26	0.11204	NA	1.66855	3.17896	2.07282	4.20709
ENSMUST00000187888	Cnppd1	0.0851566	0.967367	-3.28272	0.102755	-2.88033	0.135811
ENSMUST00000118829	Gm13841	-0.135864	0.91123	-6.68469	0.0097209	-6.28333	0.012839
ENSMUST00000148814	Tspoap1	0.20534	0.910056	-3.28985	0.102248	-2.89004	0.1349
ENSMUST00000131198	Gm13620	-0.45751	NA	-2.34072	0.197412	-1.94138	0.260366
ENSMUST00000188837	Gm28911	-0.0539842	0.976867	-5.69266	0.0193347	-5.29687	0.025438
ENSMUST00000154492	Ift88	-0.370964	0.700585	-2.45893	0.181882	-2.06381	0.239184
ENSMUST00000184889	Hnrnpll	-0.198101	0.854404	1.67167	3.18582	2.06575	4.18653
ENSMUST00000151461	Zmym6	0.0567174	0.948891	-6.39833	0.0118553	-6.00446	0.0155768
ENSMUST00000161440	Gm6822	-0.134095	0.892363	-3.01823	0.12343	-2.62543	0.162057
ENSMUST00000120596	Rpsa-ps12	0.3108	0.759527	-2.47635	0.179698	-2.08471	0.235744
ENSMUST00000181529	Gm26610	-0.331303	0.760461	0.754203	1.6867	1.14346	2.2091
ENSMUST00000182686	Gm26935	0.671147	0.525836	-1.32861	0.398151	-0.939439	0.521436
ENSMUST00000129114	Mettl5os	-0.360863	0.710181	1.03029	2.04243	1.41725	2.67075
ENSMUST00000182700	Ppp1r3e	-0.200264	0.915284	2.42785	5.38091	2.81156	7.02044
ENSMUST00000119790	Gm13680	0.0786539	0.920128	-2.29915	0.203182	-1.9252	0.263303
ENSMUST00000094830	Olfr1330	-0.320835	0.698203	-1.46788	0.361512	-1.09493	0.468158
ENSMUST00000127175	Uqcrh	-0.319976	0.777565	-1.77032	0.293144	-1.39739	0.379616
ENSMUST00000097731	Ttll10	0.388745	0.648077	1.16422	2.24111	1.53543	2.89875
ENSMUST00000153334	Shc1	-0.0639584	0.976093	-1.84716	0.277938	-1.47955	0.358601
ENSMUST00000124754	Dmrta2os	0.777494	NA	3.29682	9.82747	3.66439	12.6792
ENSMUST00000127734	Polg	0.597838	NA	-3.82224	0.0706952	-3.45558	0.0911521
ENSMUST00000129577	Clk1	-0.230251	0.865487	-3.75795	0.0739168	-3.3916	0.0952857
ENSMUST00000136102	Plekhm2	0.0309493	0.992403	-3.97363	0.0636527	-3.60899	0.0819568
ENSMUST00000118970	Gm16216	1.03099	0.298229	-5.21548	0.0269144	-4.85347	0.0345907
ENSMUST00000121449	Gm15502	-0.369385	0.805556	-4.20792	0.0541114	-3.84751	0.0694678
ENSMUST00000036208	Slc9a3	0.78956	NA	-2.83936	0.139722	-2.47904	0.179363
ENSMUST00000146564	Gm15446	-0.265992	NA	-3.25195	0.10497	-2.89209	0.134708
ENSMUST00000139014	2900052L18Rik	-0.29006	0.686236	-1.49895	0.35381	-1.14231	0.453034
ENSMUST00000078854	Olfr346	-1.38393	0.100213	-2.90035	0.133939	-2.54782	0.171013
ENSMUST00000162475	Lss	-0.159063	NA	-3.79222	0.0721816	-3.44153	0.0920441
ENSMUST00000160887	Rnf32	-0.193749	0.915823	-2.24439	0.211043	-1.89456	0.268956
ENSMUST00000078876	Olfr805	-0.498664	0.408737	-1.57374	0.335937	-1.22425	0.428019
ENSMUST00000133095	Sf3a1	-0.488609	0.797256	-3.90841	0.0665964	-3.56313	0.084604
ENSMUST00000147091	BC017158	0.216345	NA	-2.71154	0.152666	-2.36628	0.193945
ENSMUST00000129481	Cfap74	-0.011378	NA	1.75027	3.36422	2.09412	4.26967
ENSMUST00000142778	Akirin1	-0.0455482	NA	-4.51707	0.0436743	-4.17385	0.0554045
ENSMUST00000145629	Arfgap1	-0.0736076	0.963176	-4.20004	0.0544078	-3.86119	0.0688123
ENSMUST00000036712	Gm5884	-0.563242	0.244754	-2.302	0.202781	-1.96348	0.256409
ENSMUST00000129623	Mmel1	0.701285	0.524603	1.17227	2.25365	1.50877	2.84567
ENSMUST00000149940	Mir22hg	-0.0699007	0.933872	1.35679	2.56115	1.69242	3.23198
ENSMUST00000079767	Olfr972	-0.256494	0.655893	-1.34968	0.39238	-1.01566	0.494602
ENSMUST00000139546	Ints13	0.032932	NA	2.41501	5.33324	2.7489	6.72205
ENSMUST00000100144	Olfr362	-0.882471	0.0383919	-2.56388	0.16912	-2.23043	0.213096
ENSMUST00000151467	Zkscan3	-0.538825	0.493038	0.858369	1.81299	1.19173	2.28426
ENSMUST00000121001	Rpl17-ps5	0.0756404	0.958767	-3.88142	0.0678542	-3.54815	0.0854872
ENSMUST00000181030	Gm4890	-0.384259	0.42026	-1.33637	0.396016	-1.00341	0.498818
ENSMUST00000189714	1700029I15Rik	-0.37225	0.787017	1.09931	2.14252	1.43221	2.6986
ENSMUST00000161005	Gas5	1.1003	NA	2.80391	6.98329	3.13679	8.79567
ENSMUST00000155566	Mtmr3	0.120126	NA	-3.6543	0.0794232	-3.32364	0.0998814
ENSMUST00000124563	Napa	-0.665151	0.580355	-5.14221	0.0283165	-4.81273	0.0355815
ENSMUST00000140647	Napb	0.531709	0.80034	-2.35765	0.195108	-2.02888	0.245046
ENSMUST00000134125	Sema6c	0.323642	NA	-3.04769	0.120936	-2.7193	0.151848
ENSMUST00000135969	Fbxl20	0.0104074	0.997554	-4.49104	0.0444695	-4.16294	0.055825
ENSMUST00000173190	Abhd16a	0.209716	0.846188	-1.28119	0.411457	-0.953203	0.516485
ENSMUST00000176793	Baz1b	-0.362339	0.823319	-2.72174	0.151591	-2.3978	0.189754
ENSMUST00000146326	Gm15587	0.26868	0.822252	1.13438	2.19524	1.45813	2.74752
ENSMUST00000163819	Cic	-0.213513	NA	-3.67641	0.0782151	-3.35568	0.0976876
ENSMUST00000143596	Rpl31-ps14	-0.17044	0.92857	-2.0295	0.244939	-1.71071	0.305511
ENSMUST00000175818	Gm19815	-0.157996	0.931508	-1.96866	0.25549	-1.65052	0.318526
ENSMUST00000084811	Olfr586	0.0703046	0.971834	-2.15739	0.224161	-1.83965	0.279389
ENSMUST00000050599	Olfr672	-0.371625	0.682369	-1.32089	0.400289	-1.00333	0.498848
ENSMUST00000130467	Pwwp2a	0.340027	NA	2.24021	4.72467	2.55498	5.8766
ENSMUST00000129303	Clk1	0.0407672	0.980911	-1.98948	0.251829	-1.67501	0.313164
ENSMUST00000176093	Stx5a	0.702469	0.669289	-3.59162	0.0829495	-3.27794	0.103096
ENSMUST00000161686	Nfya	0.262483	NA	-3.90036	0.0669691	-3.58697	0.0832177
ENSMUST00000156902	Rai1	-0.109898	NA	2.17478	4.51516	2.48788	5.60953
ENSMUST00000137903	Ddx58	-0.390967	0.669289	1.14702	2.21456	1.45887	2.74893
ENSMUST00000182768	Dleu2	0.200506	0.935154	2.11326	4.32669	2.42447	5.36832
ENSMUST00000117131	Rpl3-ps2	-0.292773	0.766398	-2.659	0.158329	-2.34955	0.196207
ENSMUST00000180923	1700007L15Rik	-0.498848	0.358099	-1.33639	0.39601	-1.02869	0.490156
ENSMUST00000111388	Gm1821	-0.81522	0.156075	-4.59498	0.0413784	-4.28774	0.0511991
ENSMUST00000083112	Gm25632	-0.891547	NA	-4.1401	0.0567158	-3.83307	0.0701668
ENSMUST00000124362	Arid1b	0.245828	0.908708	-4.22296	0.0535503	-3.91659	0.0662199
ENSMUST00000128497	Top3b	-0.521254	NA	-4.20022	0.0544013	-3.89508	0.0672144
ENSMUST00000128595	Tprg	-0.681227	NA	2.05753	4.16272	2.36181	5.14015
ENSMUST00000180486	A530083I20Rik	-0.0901276	0.970976	-4.27811	0.0515419	-3.97543	0.0635734
ENSMUST00000117381	Gm14278	-0.800428	0.559711	-4.52139	0.0435439	-4.21967	0.0536725
ENSMUST00000124949	Tasp1	-0.473704	0.421004	1.00382	2.00531	1.30526	2.47128
ENSMUST00000139901	Ankrd12	-0.636828	NA	-4.24405	0.0527732	-3.94277	0.065029
ENSMUST00000182426	Pclo	-0.377133	0.758604	1.4869	2.80287	1.78805	3.45347
ENSMUST00000181495	4732487G21Rik	0.388023	0.748096	1.56507	2.95893	1.86575	3.64456
ENSMUST00000150409	Slc45a4	0.32928	0.807613	-5.42586	0.0232624	-5.12708	0.028615
ENSMUST00000173735	Gm6155	-0.0399523	0.971834	-3.43477	0.0924764	-3.13636	0.113726
ENSMUST00000181263	Pafah1b1-ps1	0.477392	0.864255	-2.57351	0.167995	-2.27772	0.206223
ENSMUST00000159266	Gm2962	-0.386725	0.70069	-1.85863	0.275739	-1.56324	0.33839
ENSMUST00000191143	Bclaf1	-0.565822	0.631346	-1.4313	0.370796	-1.13652	0.454855
ENSMUST00000153604	Gm5526	0.0678897	0.959446	-1.83018	0.28123	-1.53564	0.344927
ENSMUST00000146892	Mvb12b	0.965147	NA	1.84439	3.59102	2.13802	4.40158
ENSMUST00000159496	Man2c1	-0.0088277	0.99804	-3.56429	0.0845359	-3.27091	0.1036
ENSMUST00000168070	Rrnad1	-0.245725	0.852558	-3.40955	0.094107	-3.11623	0.115325
ENSMUST00000172558	Vps52	-0.162704	NA	-3.80327	0.071631	-3.51033	0.0877575
ENSMUST00000052440	Oaz1-ps	-0.321873	0.725904	-1.89824	0.26827	-1.60533	0.328661
ENSMUST00000120149	Gm6136	-0.195385	0.846878	-2.47919	0.179346	-2.18721	0.219576
ENSMUST00000093326	Gm5356	-0.147474	0.903044	-2.81411	0.14219	-2.52265	0.174023
ENSMUST00000127301	9430091E24Rik	-0.517107	0.641643	1.41478	2.66618	1.70515	3.26063
ENSMUST00000071132	Olfr970	-0.313089	0.875179	1.44549	2.72355	1.73452	3.32768
ENSMUST00000181620	D930016D06Rik	0.215739	0.710181	1.91324	3.76654	2.20209	4.60146
ENSMUST00000123920	Gm15351	0.0905533	NA	2.14709	4.42933	2.43592	5.41108
ENSMUST00000161562	Gm5822	0.101125	0.889461	-1.84464	0.278426	-1.55811	0.339595
ENSMUST00000077278	Rpl21-ps11	-0.0166704	0.994195	-2.05407	0.240804	-1.76798	0.293619
ENSMUST00000082002	Gm7808	-0.159504	0.865934	-3.68614	0.0776892	-3.40091	0.0946727
ENSMUST00000126243	Mbd6	0.107237	NA	2.6233	6.16158	2.90813	7.50643
ENSMUST00000126735	Pcsk2os1	0.0220236	0.992841	1.06909	2.09811	1.35335	2.55505
ENSMUST00000121709	Gm12276	-0.238403	0.915823	1.91615	3.77415	2.19648	4.58361
ENSMUST00000076373	Gm8730	0.612046	0.177544	-4.16348	0.0558041	-3.88355	0.0677542
ENSMUST00000162698	Gm3531	0.0732807	0.947767	-2.08611	0.235514	-1.80631	0.285921
ENSMUST00000130896	Repin1	0.634305	NA	-3.81626	0.070989	-3.5373	0.0861325
ENSMUST00000133630	R74862	-0.145979	0.937957	1.22462	2.33694	1.50242	2.83318
ENSMUST00000142292	Junos	0.177723	0.933842	1.38925	2.61942	1.66696	3.17544
ENSMUST00000172709	Xlr3a	-0.26106	NA	-3.74606	0.0745286	-3.46964	0.0902683
ENSMUST00000149945	Unc13b	-0.359654	0.86738	-2.62838	0.161726	-2.35382	0.195627
ENSMUST00000131430	Gpr155	0.866283	NA	3.39304	10.5053	3.66645	12.6973
ENSMUST00000180176	Gm9457	0.446153	0.704017	-3.16839	0.111229	-2.89506	0.134431
ENSMUST00000121965	Gm12693	-0.346531	NA	1.40812	2.65391	1.68082	3.2061
ENSMUST00000159823	Rps6kc1	-0.534351	0.377498	0.796255	1.73659	1.06836	2.09705
ENSMUST00000133715	Clint1	0.462719	0.787081	-2.31806	0.200536	-2.04631	0.242103
ENSMUST00000134710	Ccser1	-0.497967	NA	2.30403	4.93837	2.57549	5.96072
ENSMUST00000120780	Gm13341	-0.390875	0.287912	-5.84417	0.0174073	-5.57484	0.02098
ENSMUST00000098182	Olfr646	0.186629	0.917598	-2.34848	0.196352	-2.07957	0.236585
ENSMUST00000139511	H2afy	-0.149693	0.91123	-3.23582	0.10615	-2.96854	0.127756
ENSMUST00000155187	Lrrc45	0.736035	NA	2.0456	4.12846	2.31231	4.96677
ENSMUST00000031086	Olfr109	-0.494929	0.695879	-2.55093	0.170646	-2.28442	0.205268
ENSMUST00000120360	Rpl10a-ps1	-0.44445	0.585889	-1.64324	0.320137	-1.37697	0.385026
ENSMUST00000118200	Gm11460	0.309268	0.838663	-2.23278	0.212748	-1.96876	0.255472
ENSMUST00000182590	Gm27003	-0.180724	0.904534	0.876549	1.83598	1.14029	2.20426
ENSMUST00000124220	Pdrg1	0.0312665	0.988551	-5.18737	0.0274439	-4.92384	0.032944
ENSMUST00000156325	BC005624	-0.489166	0.722589	-2.3391	0.197633	-2.07588	0.237191
ENSMUST00000186786	Ino80dos	-0.00185128	0.998996	1.17636	2.26007	1.43945	2.71217
ENSMUST00000135644	Hmgcl	0.136775	NA	-2.76447	0.147168	-2.50169	0.176569
ENSMUST00000165269	Dnah12	0.0220289	NA	1.93099	3.81318	2.19292	4.5723
ENSMUST00000185536	Gm28941	-0.419801	NA	-3.52567	0.0868297	-3.26404	0.104094
ENSMUST00000075723	Gm10123	-0.779159	0.25678	-4.87805	0.0340063	-4.61768	0.0407325
ENSMUST00000170986	B230319C09Rik	-0.26688	NA	-2.35405	0.195596	-2.09415	0.234206
ENSMUST00000159719	Zcrb1	-0.015152	0.992661	-5.61926	0.0203439	-5.3607	0.0243371
ENSMUST00000117527	Gm14539	-0.586661	0.545796	-1.19615	0.436437	-0.938462	0.521789
ENSMUST00000162848	Lss	-0.727535	0.723541	-4.13428	0.0569453	-3.87815	0.0680081
ENSMUST00000151695	Mapk9	0.0770545	0.962292	-2.67597	0.156478	-2.42111	0.186713
ENSMUST00000178139	Gm25245	0.614226	NA	2.42002	5.35178	2.67471	6.38509
ENSMUST00000059546	Rpsa-ps2	-0.308675	0.819055	-3.46696	0.0904362	-3.21334	0.107818
ENSMUST00000154018	Gnpda2	-0.111894	0.958346	-2.03163	0.244579	-1.77921	0.291342
ENSMUST00000071844	Olfr603	0.540678	0.791374	-2.34521	0.196798	-2.09309	0.234378
ENSMUST00000136275	1810043G02Rik	-0.464429	0.635995	-1.6022	0.329375	-1.35126	0.39195
ENSMUST00000117365	Gm4784	-0.282376	0.890244	-4.14163	0.0566559	-3.89142	0.0673854
ENSMUST00000129901	Slc16a6	-0.372157	0.771326	-1.72779	0.301914	-1.47928	0.358667
ENSMUST00000129748	Plaa	-0.600844	0.449125	2.00433	4.01203	2.25271	4.76579
ENSMUST00000105408	Gm10941	0.23897	0.755015	0.700687	1.62528	0.948869	1.93036
ENSMUST00000131433	Dclre1c	-0.0910889	0.954685	-3.15922	0.111938	-2.9111	0.132945
ENSMUST00000118989	Gm13690	-0.274033	0.872521	-4.05464	0.0601773	-3.80686	0.0714528
ENSMUST00000156211	Ftx	-0.767677	0.444122	-3.69109	0.0774231	-3.44374	0.0919031
ENSMUST00000136385	Iqce	0.223339	0.905128	-2.23706	0.212118	-1.99106	0.251554
ENSMUST00000152371	Nfe2l2	-0.319016	0.525646	0.748467	1.68001	0.992939	1.99023
ENSMUST00000126757	Mgat5b	-0.280832	NA	-3.86811	0.0684832	-3.62372	0.0811246
ENSMUST00000144714	Arhgef1	0.609492	0.66261	-4.30943	0.0504351	-4.06641	0.0596884
ENSMUST00000155213	Tor1b	0.253006	0.857894	-3.122	0.114864	-2.87923	0.135914
ENSMUST00000174583	Gigyf2	-0.41256	0.540141	1.20117	2.29927	1.44322	2.71927
ENSMUST00000162684	Actr1b	-0.149128	0.932854	-3.72016	0.0758786	-3.48353	0.0894031
ENSMUST00000144568	A430035B10Rik	-0.470332	0.264894	-1.09143	0.469297	-0.857224	0.552014
ENSMUST00000077498	Olfr120	-0.457266	0.517537	0.774723	1.71086	1.00872	2.01213
ENSMUST00000099467	Sorbs1	0.019044	NA	-3.50621	0.0880089	-3.27239	0.103493
ENSMUST00000095195	Gm9386	-0.00560996	0.9984	-4.71715	0.0380185	-4.48462	0.0446677
ENSMUST00000167159	Ip6k1	0.613101	0.522504	-4.7201	0.037941	-4.48765	0.044574
ENSMUST00000123553	Cflar	0.0492185	0.976659	1.40631	2.65059	1.63846	3.11334
ENSMUST00000148318	D030047H15Rik	0.24952	NA	-3.10818	0.11597	-2.87685	0.136139
ENSMUST00000128847	Armcx5	-0.602678	NA	-3.76339	0.0736387	-3.53244	0.0864231
ENSMUST00000098518	Adgrl2	-0.129665	0.940247	-1.87827	0.272009	-1.64827	0.319024
ENSMUST00000141284	Slc35b1	-0.250911	0.88809	-3.07898	0.118341	-2.85075	0.138624
ENSMUST00000180922	Gm26672	-0.228119	0.878722	-2.13824	0.227157	-1.91152	0.265812
ENSMUST00000097690	Gm10557	0.732229	0.214268	-4.11908	0.0575482	-3.89301	0.0673112
ENSMUST00000130750	Lpin2	-0.118096	NA	-3.17347	0.110839	-2.94774	0.129611
ENSMUST00000181640	Lppos	0.537829	0.753057	1.751	3.36591	1.97654	3.93548
ENSMUST00000152333	Vps72	0.553802	0.651795	-3.1837	0.110055	-2.95916	0.128589
ENSMUST00000119876	Rps25-ps1	-0.459347	0.700281	-1.37445	0.385699	-1.15134	0.450206
ENSMUST00000183878	5730403I07Rik	-0.443671	0.194445	-0.587035	0.66571	-0.364729	0.776615
ENSMUST00000075650	Gm9761	-0.80171	0.316995	-2.10871	0.231854	-1.88728	0.270316
ENSMUST00000121836	Gm5903	-0.471042	0.723541	-3.38199	0.0959224	-3.16236	0.111695
ENSMUST00000149563	Efcab6	-0.0581268	NA	-1.96747	0.255701	-1.74811	0.297692
ENSMUST00000144280	Herc1	-0.607011	0.294083	1.74655	3.35555	1.96557	3.90567
ENSMUST00000155165	A430108G06Rik	0.495852	NA	1.60204	3.03573	1.82103	3.53334
ENSMUST00000147327	Gse1	-0.3444	NA	-3.6217	0.0812379	-3.40275	0.0945522
ENSMUST00000055220	Eef1d	0.337474	0.821009	-3.39831	0.0948436	-3.17943	0.110381
ENSMUST00000122900	Cstf3	-0.459695	0.28352	1.09712	2.13927	1.31293	2.48445
ENSMUST00000136982	Lsm8	-0.659521	0.489667	1.08946	2.12794	1.30506	2.47095
ENSMUST00000190788	Bap1	0.146516	NA	-3.74817	0.0744198	-3.536	0.0862104
ENSMUST00000038391	Uqcrh-ps1	-0.35946	0.781721	-3.04122	0.121479	-2.82988	0.140644
ENSMUST00000167516	Gm5141	-0.678266	0.633151	-1.72346	0.302823	-1.51392	0.350158
ENSMUST00000161985	Gm16579	-0.253862	0.772525	-0.944318	0.519675	-0.735206	0.600732
ENSMUST00000185402	5430405H02Rik	-0.114393	0.960544	-2.04367	0.242546	-1.83487	0.280317
ENSMUST00000123246	42802	0.138076	NA	-2.80663	0.142929	-2.59846	0.165115
ENSMUST00000139391	Zc3h7a	-0.839812	0.634437	-2.52705	0.173493	-2.31931	0.200363
ENSMUST00000130308	Pclaf	-0.725791	0.435157	1.23667	2.35655	1.44349	2.71978
ENSMUST00000123840	2900072N19Rik	0.120554	0.917771	0.768502	1.7035	0.974061	1.96436
ENSMUST00000077435	Gm6807	-0.0595406	0.961519	-3.25556	0.104708	-3.05065	0.120688
ENSMUST00000101199	Gm13192	0.624599	0.427201	-4.01599	0.0618112	-3.81123	0.0712367
ENSMUST00000153727	Kpnb1	-0.623994	NA	-2.7208	0.15169	-2.51738	0.17466
ENSMUST00000147338	Ciz1	0.434477	NA	-3.34435	0.0984578	-3.14731	0.112867
ENSMUST00000126926	Gm15417	-0.16751	0.801316	0.707497	1.63297	0.903379	1.87044
ENSMUST00000145642	Cnga2	-0.243935	0.86738	-3.25893	0.104463	-3.06307	0.119653
ENSMUST00000185238	1700025F24Rik	-0.213972	0.823894	1.27231	2.41549	1.46545	2.7615
ENSMUST00000179788	Gm7173	0.0839827	0.948891	-6.35084	0.012252	-6.15852	0.0139991
ENSMUST00000176387	Gm20712	0.0259648	0.988551	2.39404	5.25627	2.58616	6.00497
ENSMUST00000132831	Rnft2	-0.286131	NA	-2.89583	0.134359	-2.70483	0.153379
ENSMUST00000165676	Gm17024	0.842013	NA	-2.79582	0.144004	-2.60537	0.164326
ENSMUST00000162897	Xkr4	-0.182864	0.890358	-2.64351	0.160038	-2.45328	0.182595
ENSMUST00000130539	Mapk8	-0.281682	0.738691	-3.64541	0.0799139	-3.45616	0.0911157
ENSMUST00000180820	Tmem147os	0.366646	0.464653	-0.778985	0.582777	-0.589774	0.664447
ENSMUST00000180921	A330033J07Rik	-0.819399	0.293206	-1.34975	0.392359	-1.16125	0.447126
ENSMUST00000052615	Gm9800	-0.476181	0.421004	-3.21768	0.107494	-3.02936	0.122482
ENSMUST00000122331	Gm12989	-0.160496	0.900151	-1.74453	0.298432	-1.55642	0.339994
ENSMUST00000166997	Serinc1	-0.380682	0.755613	-2.73972	0.149714	-2.55302	0.170398
ENSMUST00000178074	Rab10os	-0.0166485	0.985731	1.06831	2.09698	1.25492	2.38654
ENSMUST00000189334	2810405F17Rik	-0.230896	0.502056	0.433161	1.35019	0.616881	1.53356
ENSMUST00000185067	2610037D02Rik	-0.00972978	0.993341	-1.13572	0.455107	-0.952399	0.516773
ENSMUST00000135883	Arl4aos	0.174185	0.926287	-1.99308	0.251202	-1.81022	0.285147
ENSMUST00000140671	Mpi	-0.883955	NA	-4.01235	0.0619673	-3.8304	0.0702969
ENSMUST00000141369	Kctd13	-0.208614	0.927787	-3.74845	0.0744051	-3.56745	0.084351
ENSMUST00000151243	Hfe	-0.277579	0.292809	0.467354	1.38257	0.647687	1.56665
ENSMUST00000185375	Ep300	-0.130919	0.880049	0.586683	1.50179	0.766309	1.70091
ENSMUST00000098781	AA386476	0.621785	0.627036	-1.915	0.265172	-1.73654	0.300089
ENSMUST00000161190	Rpl18a-ps1	0.108674	0.941992	-2.61017	0.16378	-2.43243	0.185253
ENSMUST00000071866	Rpl13a-ps1	-0.161653	0.909298	-1.85605	0.276232	-1.67924	0.312248
ENSMUST00000125518	Gm13563	-0.00131274	0.999589	-1.43535	0.369758	-1.25968	0.417638
ENSMUST00000125071	Gm16185	0.0916341	NA	-3.59927	0.0825111	-3.42479	0.0931184
ENSMUST00000190224	Gm29170	-0.113049	0.771313	0.552032	1.46615	0.72636	1.65446
ENSMUST00000181363	Gm8652	0.255884	0.885564	-2.85777	0.137952	-2.68387	0.155623
ENSMUST00000117176	Gm7803	0.0205109	0.989737	-3.52042	0.0871463	-3.34664	0.0983018
ENSMUST00000033277	Knop1	-0.115756	0.904538	-2.84289	0.139381	-2.66916	0.157218
ENSMUST00000134113	Proser3	0.186447	0.929374	-2.51442	0.175019	-2.34157	0.197295
ENSMUST00000144300	Ndel1	-0.419049	0.585094	-3.53773	0.0861069	-3.36553	0.0970229
ENSMUST00000146035	Gtf2h5	-0.18778	NA	-2.49821	0.176996	-2.32614	0.199416
ENSMUST00000153216	Odf2	-0.837591	NA	-3.86288	0.0687315	-3.69162	0.0773949
ENSMUST00000112168	Olfr55	-0.728488	0.000761337	-2.81989	0.141621	-2.65004	0.159315
ENSMUST00000071067	C330011M18Rik	-0.227701	0.627591	-1.67256	0.313696	-1.50297	0.352827
ENSMUST00000155890	Agbl3	-0.325958	NA	2.08943	4.25581	2.25856	4.78514
ENSMUST00000142648	Cfap44	-0.24014	0.777565	-4.43738	0.0461548	-4.26931	0.0518573
ENSMUST00000139930	Casp2	-0.110834	NA	-3.17906	0.110409	-3.01102	0.124049
ENSMUST00000150906	Gm15879	0.134059	0.949631	1.10308	2.14813	1.26941	2.41062
ENSMUST00000099765	Olfr1253	-0.537043	0.456672	-1.5689	0.337065	-1.40258	0.378251
ENSMUST00000125416	Col14a1	1.09245	NA	2.67928	6.40536	2.84525	7.18631
ENSMUST00000184602	2810039B14Rik	-0.0933249	0.962561	-1.94016	0.260588	-1.77432	0.292332
ENSMUST00000180890	Gm26585	-0.0398707	NA	-2.18124	0.220485	-2.01562	0.247308
ENSMUST00000104880	Olfr596	-0.341738	0.85025	-2.80574	0.143017	-2.64088	0.16033
ENSMUST00000108926	Zfp971	-0.443092	0.745123	-3.64394	0.0799956	-3.48064	0.0895827
ENSMUST00000061738	Olfr571	0.0435598	0.976659	-1.73267	0.300895	-1.56948	0.33693
ENSMUST00000100510	Gm16409	0.12567	0.916418	-3.39896	0.0948009	-3.23683	0.106076
ENSMUST00000142768	Atp5g3	-0.162084	0.884046	0.878498	1.83846	1.03965	2.05573
ENSMUST00000126387	BC021767	-0.280282	0.901618	-2.66594	0.15757	-2.50777	0.175827
ENSMUST00000129061	Cse1l	-0.980952	NA	1.97519	3.93181	2.13284	4.38579
ENSMUST00000118424	Top3b	0.447921	0.723484	-4.57207	0.0420406	-4.41447	0.0468935
ENSMUST00000077111	Gm6028	0.0475161	0.981872	-1.78964	0.289244	-1.63437	0.322111
ENSMUST00000057477	Olfr791	-0.40186	0.525836	-1.66601	0.315123	-1.51095	0.350879
ENSMUST00000128665	Surf1	-0.0793493	NA	-2.40448	0.188876	-2.24999	0.210226
ENSMUST00000117517	Gm8666	0.501562	0.688259	-2.01639	0.247176	-1.86308	0.274889
ENSMUST00000119669	Gm11512	-0.29432	0.883732	-3.4472	0.0916834	-3.29391	0.101961
ENSMUST00000137598	Gm11614	-0.355178	0.881647	-3.75575	0.0740297	-3.60307	0.0822938
ENSMUST00000044043	Gm11273	-0.205721	0.771387	-2.28873	0.204655	-2.13649	0.227433
ENSMUST00000112199	Tchp	0.719073	0.755613	-3.32771	0.0996002	-3.17563	0.110673
ENSMUST00000154896	Atp6v0a1	-0.713398	NA	-2.01825	0.246857	-1.86643	0.274252
ENSMUST00000183770	Gm7866	-0.00927821	0.995169	-4.49034	0.044491	-4.33881	0.0494184
ENSMUST00000146000	Macf1	0.336021	NA	-3.47947	0.0896552	-3.3284	0.0995527
ENSMUST00000141071	Csnk1d	0.520025	0.721045	-1.86241	0.275017	-1.71159	0.305323
ENSMUST00000162098	Shox2	-0.0971064	0.935535	1.43609	2.70587	1.58569	3.00152
ENSMUST00000130772	Rtel1	-0.279304	0.854016	-4.43694	0.0461687	-4.29059	0.0510979
ENSMUST00000121700	Gm14281	-0.229662	0.552	-2.22814	0.213434	-2.08314	0.236001
ENSMUST00000181960	1300002E11Rik	-0.17472	0.879335	1.10907	2.15707	1.25252	2.38257
ENSMUST00000095245	Olfr806	-0.600887	0.356746	-2.07456	0.237407	-1.93116	0.262218
ENSMUST00000181813	6430590A07Rik	0.716237	0.403236	-2.3555	0.1954	-2.21314	0.215665
ENSMUST00000099076	4931440P22Rik	0.309515	0.865487	1.0744	2.10584	1.21573	2.32258
ENSMUST00000146154	1700123M08Rik	-0.180356	0.918562	-1.62745	0.323659	-1.4867	0.356829
ENSMUST00000118985	Gm14541	0.000809155	0.999757	-3.99316	0.0627969	-3.85401	0.0691556
ENSMUST00000082396	mt-Nd2	-0.62774	0.234473	-2.3818	0.191871	-2.24267	0.211295
ENSMUST00000136835	Micu3	0.0824957	0.890712	0.929792	1.905	1.06862	2.09742
ENSMUST00000132883	Gm14295	0.0812628	0.974008	-3.22956	0.106612	-3.09183	0.117292
ENSMUST00000143597	Zfp407	-0.239069	0.900151	1.20869	2.31128	1.34551	2.54121
ENSMUST00000134059	Gm13073	-0.15656	0.915823	-2.22629	0.213708	-2.09003	0.234876
ENSMUST00000145272	Gabpb2	-0.472544	NA	1.83511	3.56798	1.97128	3.92117
ENSMUST00000165198	Gm9294	0.333395	0.675164	-2.86823	0.136955	-2.73457	0.150249
ENSMUST00000131206	Usp16	-0.0338286	NA	2.35187	5.10487	2.48544	5.60005
ENSMUST00000118946	Gm11451	-0.0991351	0.920128	-1.22243	0.428561	-1.09008	0.469734
ENSMUST00000142769	Crtc1	0.14146	0.965014	-4.28771	0.0512001	-4.15641	0.0560783
ENSMUST00000073704	Olfr776	-0.876439	0.218833	-2.38074	0.192011	-2.24947	0.210302
ENSMUST00000146378	Iqcc	0.116004	NA	1.68937	3.22515	1.82	3.53081
ENSMUST00000182156	Nup153	-0.242834	NA	-3.70923	0.0764556	-3.57914	0.0836703
ENSMUST00000127999	Cox6c	0.150278	0.84549	-1.21653	0.430317	-1.08836	0.470296
ENSMUST00000167223	Nisch	0.848204	0.362362	-5.56613	0.0211071	-5.43876	0.0230552
ENSMUST00000176275	Gm20627	0.0107753	0.997254	-3.34529	0.0983939	-3.21831	0.107447
ENSMUST00000172650	Gm7393	0.0223368	0.982311	-3.5594	0.084823	-3.43341	0.0925639
ENSMUST00000154003	BC017158	0.150744	0.941471	-4.84249	0.0348549	-4.71891	0.0379724
ENSMUST00000160671	Lss	-0.301062	0.811189	2.04553	4.12825	2.16903	4.4972
ENSMUST00000138361	Gm13648	-0.360601	0.420712	-2.15137	0.225099	-2.02796	0.245202
ENSMUST00000180999	Gm16892	-0.132594	0.874217	-4.0517	0.0602998	-3.92858	0.065672
ENSMUST00000137953	Trmt1	-0.182564	0.908655	-3.4961	0.0886279	-3.37401	0.0964544
ENSMUST00000149319	Tmem74bos	-0.398398	0.294083	-0.995789	0.501462	-0.874031	0.54562
ENSMUST00000080162	Olfr1490	-1.07282	0.0620761	-2.63332	0.161173	-2.5124	0.175264
ENSMUST00000117516	Gm13414	0.0941957	0.956395	-3.1924	0.109393	-3.07181	0.11893
ENSMUST00000151790	G3bp1	-0.0113806	0.995238	-3.71251	0.0762824	-3.59249	0.0828994
ENSMUST00000152612	Brd8	-0.441691	0.586686	-3.67867	0.0780926	-3.55909	0.0848411
ENSMUST00000188481	C030034I22Rik	-0.483659	0.526415	0.754476	1.68702	0.873386	1.83196
ENSMUST00000145445	Il11ra1	-0.223143	0.912256	-3.01177	0.123984	-2.89374	0.134554
ENSMUST00000127100	Plod3	0.724646	NA	-2.83345	0.140297	-2.71589	0.152208
ENSMUST00000130659	Gm12940	-0.652392	0.47952	0.826977	1.77396	0.94418	1.9241
ENSMUST00000175873	Scn3b	0.100204	0.95014	-4.72381	0.0378436	-4.60688	0.0410385
ENSMUST00000152595	Gm15545	0.16798	0.905477	1.24859	2.3761	1.3647	2.57522
ENSMUST00000170713	Myg1	0.00223469	0.998996	-2.00062	0.249893	-1.88462	0.270815
ENSMUST00000188038	Gm37494	0.214174	0.879229	1.9735	3.9272	2.08941	4.25573
ENSMUST00000179333	Ppp1r2-ps6	-0.41635	0.777565	-2.54986	0.170772	-2.43618	0.184772
ENSMUST00000131221	2310058D17Rik	-0.0928678	0.857839	-0.873084	0.545979	-0.76072	0.590202
ENSMUST00000138007	C030037D09Rik	-0.0889045	0.92898	-1.44972	0.366093	-1.33779	0.395626
ENSMUST00000117664	Gm10241	-0.47028	0.829726	-3.59399	0.0828133	-3.4832	0.0894236
ENSMUST00000099656	Olfr201	-0.302296	0.820418	-3.32309	0.0999198	-3.2125	0.10788
ENSMUST00000132778	AU022252	0.264001	0.797256	0.879889	1.84023	0.99002	1.98621
ENSMUST00000136448	Ift80	0.0815106	0.963836	-2.6946	0.15447	-2.58622	0.166521
ENSMUST00000127724	Slc23a2	0.270544	NA	2.10861	4.31277	2.2157	4.64508
ENSMUST00000160986	Mroh1	0.240686	0.86735	-3.95699	0.0643913	-3.85145	0.0692785
ENSMUST00000149188	Dmpk	0.255095	NA	-3.34435	0.0984578	-3.23945	0.105883
ENSMUST00000082418	mt-Nd5	-0.504836	0.297588	-3.46587	0.0905044	-3.36108	0.0973225
ENSMUST00000074168	Olfr365	-0.394532	0.29981	-2.01525	0.247371	-1.91098	0.265912
ENSMUST00000147218	Elk4	0.175212	0.873028	2.88014	7.36222	2.98433	7.9136
ENSMUST00000129700	Acin1	0.585279	NA	-3.07417	0.118736	-2.97005	0.127622
ENSMUST00000180953	5330439K02Rik	0.0137883	0.992403	-1.58656	0.332965	-1.48272	0.357813
ENSMUST00000160364	Coq9	0.532938	0.798387	-4.47021	0.0451161	-4.36653	0.0484777
ENSMUST00000132544	Pogz	-0.255096	NA	-3.36866	0.0968127	-3.26522	0.104009
ENSMUST00000087129	Olfr130	-0.402739	0.599839	-3.17092	0.111035	-3.06753	0.119284
ENSMUST00000130607	Gm16195	-0.664383	NA	-3.59315	0.0828619	-3.49241	0.0888547
ENSMUST00000074540	Olfr373	0.65436	0.662436	-3.06443	0.119541	-2.96406	0.128153
ENSMUST00000132077	Tug1	-0.0772891	0.958422	3.21725	9.30012	3.31672	9.96396
ENSMUST00000093865	Olfr143	0.0213386	0.991186	-1.67519	0.313124	-1.5768	0.335225
ENSMUST00000146471	Thap3	0.267793	0.86738	-3.27375	0.103396	-3.17558	0.110676
ENSMUST00000117476	Rps15a-ps6	0.618498	0.372933	-3.4648	0.0905717	-3.36724	0.0969081
ENSMUST00000171307	Olfr455	0.111535	0.848841	-3.02182	0.123124	-2.92447	0.131718
ENSMUST00000181456	Gm26832	-0.172275	0.788871	-2.54676	0.171139	-2.44951	0.183073
ENSMUST00000119140	Gm12411	-0.147823	0.952064	-1.6991	0.307978	-1.60399	0.328966
ENSMUST00000160241	Gm15810	-0.0657474	0.979633	-2.29559	0.203685	-2.20072	0.21753
ENSMUST00000117547	Gm13803	-0.126935	0.935154	-1.81208	0.28478	-1.71806	0.303957
ENSMUST00000154231	Zer1	0.375012	0.794793	-4.98202	0.031642	-4.8881	0.0337703
ENSMUST00000178993	Gm4617	-0.409472	0.567586	-2.7723	0.146371	-2.67843	0.156212
ENSMUST00000120465	Gm11224	-0.385441	0.768905	-1.56834	0.337197	-1.47496	0.359744
ENSMUST00000165043	Mms19	-0.316188	NA	-2.89736	0.134217	-2.80462	0.143129
ENSMUST00000150320	Ankrd16	0.318926	0.736204	-4.21078	0.0540043	-4.11882	0.057559
ENSMUST00000149805	Numbl	1.03903	0.47877	-4.22141	0.0536078	-4.12946	0.0571359
ENSMUST00000130938	Slc9a7	-0.0142514	NA	2.49863	5.65149	2.58948	6.01882
ENSMUST00000180931	Gm26672	0.108333	0.905183	-3.27168	0.103544	-3.18151	0.110222
ENSMUST00000149736	Osbpl5	0.726707	NA	-3.79222	0.0721816	-3.70337	0.0767668
ENSMUST00000125058	Cdk9	0.0185842	0.98859	1.29096	2.44691	1.37885	2.60061
ENSMUST00000186492	Stk16	-0.276685	NA	-2.49636	0.177224	-2.41047	0.188095
ENSMUST00000143178	Tmed7	-0.454783	0.312643	0.66935	1.59036	0.754854	1.68746
ENSMUST00000144625	Cfap74	-0.0879596	NA	-2.36405	0.194245	-2.27959	0.205956
ENSMUST00000128895	Hemk1	0.456161	0.781191	-4.06515	0.0597402	-3.98098	0.0633296
ENSMUST00000134636	Rplp2	2.02595	NA	2.21965	4.65782	2.30381	4.93759
ENSMUST00000185694	BC043934	-0.143546	0.908655	-1.83732	0.279841	-1.75406	0.296467
ENSMUST00000119616	Gm12943	-0.138702	0.954872	-4.051	0.0603294	-3.96836	0.063886
ENSMUST00000134573	Mcts1	0.354627	0.701104	-2.22632	0.213704	-2.14456	0.226164
ENSMUST00000092657	Taar7d	-1.19836	0.173437	-2.26954	0.207396	-2.188	0.219456
ENSMUST00000181309	Gm16701	-0.185006	0.796952	0.899528	1.86546	0.97991	1.97234
ENSMUST00000094363	Fam161a	0.395479	0.798832	2.49903	5.65304	2.57922	5.97617
ENSMUST00000171504	Gm4707	-0.277795	0.78633	-2.70765	0.153079	-2.62848	0.161714
ENSMUST00000154729	Sirt4	-0.294117	NA	-2.10528	0.232406	-2.02739	0.245299
ENSMUST00000190080	Trerf1	0.0618468	0.956807	2.28488	4.87325	2.36256	5.14281
ENSMUST00000147471	Psmd6	0.978704	NA	-3.56121	0.0847168	-3.48406	0.0893704
ENSMUST00000152778	42980	0.237605	NA	-2.93646	0.130628	-2.86007	0.137732
ENSMUST00000191182	A930005H10Rik	0.471617	0.592133	-1.53459	0.345177	-1.45827	0.36393
ENSMUST00000143384	Eif3i	0.10196	0.971834	-2.80454	0.143136	-2.72826	0.150908
ENSMUST00000083065	Gm26035	-0.615803	0.629426	-5.96842	0.0159708	-5.89215	0.0168378
ENSMUST00000141846	B230369F24Rik	-0.199403	0.531182	0.337378	1.26346	0.413413	1.33183
ENSMUST00000127791	Klhdc1	0.107237	NA	3.39463	10.5169	3.47066	11.0859
ENSMUST00000135928	Ncstn	0.205526	NA	-1.80325	0.286527	-1.7287	0.301723
ENSMUST00000135305	Nup35	-0.834409	NA	-2.78018	0.145574	-2.70619	0.153234
ENSMUST00000155761	Nmt2	1.34933	NA	-3.5221	0.0870447	-3.44862	0.0915927
ENSMUST00000139078	Pigq	-0.599856	0.774418	-3.37214	0.0965797	-3.29902	0.101601
ENSMUST00000127473	Tm9sf1	0.367984	0.852356	-1.75648	0.295969	-1.68422	0.311171
ENSMUST00000174226	Skiv2l	0.107237	NA	3.92548	15.1945	3.99662	15.9626
ENSMUST00000126787	Itga6	0.323629	0.829864	2.20327	4.60522	2.27419	4.83728
ENSMUST00000151587	Tmem41b	-0.267693	NA	-4.1099	0.0579158	-4.03924	0.0608229
ENSMUST00000138739	Mrps15	-0.125252	0.935369	-1.86022	0.275433	-1.79093	0.288985
ENSMUST00000110798	Gm4204	-0.0491564	0.963977	-0.979156	0.507276	-0.910453	0.532018
ENSMUST00000099752	Olfr142	-1.10718	0.093955	-1.67394	0.313395	-1.60842	0.327958
ENSMUST00000123212	Phf2os1	-0.0665894	0.924506	-0.855968	0.552495	-0.79143	0.577771
ENSMUST00000072513	Olfr68	0.163928	0.949631	-3.0621	0.119734	-2.99858	0.125123
ENSMUST00000180752	Gm16973	0.335158	0.677753	1.17965	2.26521	1.24221	2.36561
ENSMUST00000172394	Gm17060	0.245721	NA	-2.18969	0.219198	-2.12721	0.2289
ENSMUST00000189981	Klhl12	-0.100553	0.956287	-4.21444	0.0538675	-4.1522	0.0562422
ENSMUST00000149257	Wdr13	0.70119	0.617226	-4.52812	0.0433411	-4.46592	0.0452504
ENSMUST00000146298	Sf1	0.176693	0.941458	-4.14196	0.056643	-4.07981	0.0591363
ENSMUST00000115829	Zscan30	0.28508	0.854755	-2.37664	0.192557	-2.31575	0.200858
ENSMUST00000119733	Gm13509	-0.274943	0.661098	-2.06689	0.238673	-2.006	0.248962
ENSMUST00000148740	F730043M19Rik	0.141713	0.755613	0.544596	1.45861	0.605187	1.52118
ENSMUST00000119683	Gm6341	0.0400502	0.965127	-3.15917	0.111942	-3.09872	0.116733
ENSMUST00000151670	Gm12996	-0.140115	0.840768	-0.822436	0.565486	-0.762308	0.589552
ENSMUST00000181855	Senp1	-0.330414	NA	-3.43361	0.0925507	-3.37354	0.0964855
ENSMUST00000184994	A330093E20Rik	-1.04442	0.497299	-3.71136	0.0763433	-3.65341	0.0794717
ENSMUST00000146904	Cars	-0.593517	0.750431	-2.77209	0.146392	-2.71442	0.152363
ENSMUST00000131070	Ide	-0.0995779	0.870673	0.628808	1.54629	0.684369	1.607
ENSMUST00000075613	Olfr781	-0.556396	0.478642	-1.65563	0.3174	-1.60097	0.329655
ENSMUST00000176138	Hbp1	-0.398362	NA	-2.24881	0.210397	-2.19464	0.218447
ENSMUST00000166127	4930431P03Rik	0.382037	NA	3.36978	10.3372	3.42141	10.7139
ENSMUST00000085365	Gm16477	-0.119414	0.915823	-4.93342	0.032726	-4.88269	0.0338973
ENSMUST00000169488	Wiz	-0.352433	0.641384	-5.48301	0.0223589	-5.43428	0.023127
ENSMUST00000178377	Rab11b-ps2	0.00819522	0.995344	-1.71522	0.304555	-1.66733	0.314835
ENSMUST00000107351	Snapin	-0.309877	0.837741	-2.3438	0.19699	-2.29894	0.203213
ENSMUST00000100564	Auts2	-0.139616	NA	1.6918	3.23059	1.73651	3.33228
ENSMUST00000124595	Nfx1	-0.181974	0.893803	-2.74802	0.148855	-2.70398	0.153469
ENSMUST00000125939	B4galt3	0.102058	NA	-3.30847	0.100938	-3.26456	0.104057
ENSMUST00000118488	Gm6415	0.160649	0.927403	-1.31593	0.401666	-1.2722	0.414028
ENSMUST00000099785	Olfr1232	-0.378621	0.699449	1.50516	2.83856	1.54855	2.92523
ENSMUST00000182604	Rexo1	0.454204	NA	-3.45701	0.0910616	-3.41382	0.0938293
ENSMUST00000101410	Gm7173	0.0796868	0.952396	-3.70104	0.076891	-3.65833	0.0792016
ENSMUST00000170907	Xrcc6	-0.226129	NA	-2.71432	0.152373	-2.67312	0.156788
ENSMUST00000151171	Anapc1	-0.157348	0.939561	-3.71246	0.0762849	-3.67168	0.0784718
ENSMUST00000182524	Gm2076	-0.592203	0.485817	-2.10649	0.232211	-2.06588	0.238841
ENSMUST00000181452	Gm17435	-0.135778	0.915823	-1.21942	0.429455	-1.17883	0.441709
ENSMUST00000076828	Gm5265	-0.695231	0.612819	-1.84636	0.278093	-1.80795	0.285596
ENSMUST00000074761	Gm10134	0.139921	0.901966	-1.50164	0.353152	-1.46403	0.36248
ENSMUST00000174706	Ptdss2	0.149346	0.831111	-2.09978	0.233294	-2.06343	0.239247
ENSMUST00000140318	Nle1	-0.238871	0.933203	-3.49442	0.0887306	-3.4583	0.0909806
ENSMUST00000119008	Gm7645	0.129974	0.942883	-2.75142	0.148504	-2.71673	0.152119
ENSMUST00000149639	Ddx3x	-0.534891	NA	-2.9574	0.128746	-2.92357	0.131801
ENSMUST00000156196	Gas2l1	-0.191889	0.904534	-3.01659	0.123571	-2.98319	0.126465
ENSMUST00000169125	Zfp964	-0.234757	0.889461	-2.79225	0.14436	-2.75904	0.147723
ENSMUST00000068992	Pcdh9	-0.175397	0.710028	-2.16628	0.222784	-2.13316	0.227957
ENSMUST00000133047	Slc39a13	0.0879796	0.976867	-3.48211	0.0894911	-3.44939	0.0915438
ENSMUST00000181942	4831440E17Rik	0.00240287	0.998996	-1.66799	0.314691	-1.63583	0.321785
ENSMUST00000162754	Zdhhc24	0.204069	0.913863	-3.8025	0.0716693	-3.77096	0.0732536
ENSMUST00000185486	Gm28875	0.885854	NA	4.35904	20.5212	4.3902	20.9692
ENSMUST00000142299	Gm13194	0.300298	0.888304	2.2341	4.70469	2.26513	4.80698
ENSMUST00000138322	Bend7	-0.318465	0.595307	1.38695	2.61526	1.41752	2.67125
ENSMUST00000137730	Gm16196	-0.20278	0.672959	-1.89281	0.269282	-1.86237	0.275025
ENSMUST00000149595	Gprasp1	0.0313284	0.991001	-2.06709	0.23864	-2.03711	0.243652
ENSMUST00000134622	Ezh1	-0.104589	0.958346	-3.99846	0.0625668	-3.96896	0.0638591
ENSMUST00000160676	Gm6485	-0.228867	0.654354	-1.45724	0.36419	-1.42784	0.371686
ENSMUST00000136799	Snx11	0.0752822	0.976623	-3.27502	0.103305	-3.24574	0.105423
ENSMUST00000154477	Sharpin	-0.460267	0.845665	-3.03978	0.1216	-3.01163	0.123997
ENSMUST00000118928	Gm13456	-0.223548	0.864704	-1.97392	0.254561	-1.94614	0.25951
ENSMUST00000141952	Nup210	0.165375	NA	-2.97531	0.127158	-2.94773	0.129612
ENSMUST00000175896	Lhx2	0.37204	0.681962	-3.77345	0.0731273	-3.74612	0.0745257
ENSMUST00000131044	Gm13185	-0.303521	0.337169	-2.39495	0.190129	-2.36814	0.193695
ENSMUST00000133438	Pithd1	0.165432	0.867658	1.12187	2.1763	1.14859	2.21697
ENSMUST00000125734	Zfand1	0.262352	0.762649	-1.07651	0.474174	-1.05153	0.482457
ENSMUST00000136454	Appbp2os	-0.217186	0.88885	-2.49437	0.177468	-2.46947	0.180558
ENSMUST00000082419	mt-Nd6	-0.465637	0.356967	-1.88072	0.271549	-1.85736	0.275981
ENSMUST00000148738	Stard3	0.348279	NA	-2.99743	0.125223	-2.97619	0.12708
ENSMUST00000148766	Myt1	-0.569713	NA	-3.32422	0.0998413	-3.30479	0.101195
ENSMUST00000157008	Gss	0.208432	0.900119	-2.70174	0.153707	-2.68246	0.155775
ENSMUST00000081361	A930017M01Rik	0.662622	0.682736	-3.87072	0.0683594	-3.85227	0.0692391
ENSMUST00000137717	Copg1	0.337363	0.708504	-5.51745	0.0218315	-5.49981	0.0221
ENSMUST00000128146	Lmf1	-0.35732	0.809496	-2.36824	0.193682	-2.35191	0.195887
ENSMUST00000142836	Dnah9	-0.205908	0.885538	1.69523	3.23829	1.71123	3.27439
ENSMUST00000154405	Qrsl1	-0.638473	0.708504	-4.00863	0.0621272	-3.99314	0.0627978
ENSMUST00000119051	Gm12168	0.362744	NA	-2.33482	0.198221	-2.31941	0.20035
ENSMUST00000132008	Ddx20	-0.234964	NA	-3.15384	0.112357	-3.13851	0.113557
ENSMUST00000133165	Tprgl	-0.154095	0.915141	-3.50172	0.0882832	-3.48639	0.0892261
ENSMUST00000120233	Vcp-rs	-0.391569	0.376905	-1.51253	0.350496	-1.49762	0.354137
ENSMUST00000177415	Gm4705	0.127249	0.933891	-2.00856	0.248521	-1.99433	0.250984
ENSMUST00000172606	Gm8738	0.34368	NA	1.59654	3.02418	1.61065	3.05389
ENSMUST00000061766	Ankdd1a	0.169125	0.898193	-2.03728	0.243622	-2.0249	0.245722
ENSMUST00000153106	Gm16130	0.0974041	0.937719	-2.43888	0.184427	-2.42852	0.185756
ENSMUST00000143681	Rbbp7	-0.570587	NA	2.42177	5.35828	2.43156	5.39478
ENSMUST00000146032	Abcc1	0.361905	NA	-3.11137	0.115714	-3.10209	0.11646
ENSMUST00000133929	Pde4d	2.00833	NA	2.74252	6.69238	2.75151	6.73422
ENSMUST00000149160	Ccnl1	0.343437	NA	-2.83075	0.140559	-2.82184	0.14143
ENSMUST00000139963	Sh3glb2	0.481837	0.507217	-7.32663	0.00622967	-7.31953	0.00626041
ENSMUST00000181587	1810014B01Rik	-0.0894941	0.916418	-1.43183	0.370661	-1.42515	0.372381
ENSMUST00000136214	Mettl2	0.801753	0.403094	-2.0706	0.238061	-2.06601	0.238819
ENSMUST00000188260	A930005H10Rik	0.107237	NA	2.87176	7.31959	2.87478	7.3349
ENSMUST00000181390	Gm26873	-0.375135	0.823046	-1.84812	0.277754	-1.84576	0.278208
ENSMUST00000085664	Zfp433	-0.242642	0.85234	-3.51373	0.0875511	-3.51184	0.0876662
ENSMUST00000121439	Gm12936	0.226525	0.931508	-3.23254	0.106392	-3.23151	0.106468
ENSMUST00000145306	Obsl1	0.851859	NA	-2.24072	0.211581	-2.23996	0.211692
ENSMUST00000151430	Thoc2	0.738359	NA	-2.51101	0.175433	-2.51055	0.175489
[truncated: 6,985 more rows]
