# Supplementary material for: The role of the NMD factor UPF3B in olfactory sensory neurons
Source: eLife. 2020 Aug 10;9:e57525. doi: 10.7554/eLife.57525 (PMC7452722; doi:10.7554/eLife.57525)
Supplement: Supplementary file 3. [file elife-57525-supp3.xlsx]

## Sheet: NMD substrates
GeneID	Transcript or ensembl ID	Reference	Method of Identification	Cell Type	Category
For RNA-seq, the cut-off is q<0.05, log2FC>0.3
Zfp518b	ENSMUSG00000046572	Hurt et al. 2013	siUPF1, CHX, UPF1-CLIP	mouse ES	siUPF1-Up
Zfp445	ENSMUSG00000047036	Hurt et al. 2013	siUPF1, CHX, UPF1-CLIP	mouse ES	siUPF1-Up
Zfp217	ENSMUSG00000052056	Hurt et al. 2013	siUPF1, CHX, UPF1-CLIP	mouse ES	siUPF1-Up
Wdr82	ENSMUSG00000020257	Hurt et al. 2013	siUPF1, CHX, UPF1-CLIP	mouse ES	siUPF1-Up
Wdr76	ENSMUSG00000027242	Hurt et al. 2013	siUPF1, CHX, UPF1-CLIP	mouse ES	siUPF1-Up
Wdr5	ENSMUSG00000026917	Hurt et al. 2013	siUPF1, CHX, UPF1-CLIP	mouse ES	siUPF1-Up
Usp22	ENSMUSG00000042506	Hurt et al. 2013	siUPF1, CHX, UPF1-CLIP	mouse ES	siUPF1-Up
Ubqln1	ENSMUSG00000005312	Hurt et al. 2013	siUPF1, CHX, UPF1-CLIP	mouse ES	siUPF1-Up
Ube2g2	ENSMUSG00000009293	Hurt et al. 2013	siUPF1, CHX, UPF1-CLIP	mouse ES	siUPF1-Up
Tsr2	ENSMUSG00000025264	Hurt et al. 2013	siUPF1, CHX, UPF1-CLIP	mouse ES	siUPF1-Up
Tmem186	ENSMUSG00000043140	Hurt et al. 2013	siUPF1, CHX, UPF1-CLIP	mouse ES	siUPF1-Up
Tle3	ENSMUSG00000032280	Hurt et al. 2013	siUPF1, CHX, UPF1-CLIP	mouse ES	siUPF1-Up
Sult4a1	ENSMUSG00000018865	Hurt et al. 2013	siUPF1, CHX, UPF1-CLIP	mouse ES	siUPF1-Up
Smg7	ENSMUSG00000042772	Hurt et al. 2013	siUPF1, CHX, UPF1-CLIP	mouse ES	siUPF1-Up
Slc23a2	ENSMUSG00000027340	Hurt et al. 2013	siUPF1, CHX, UPF1-CLIP	mouse ES	siUPF1-Up
Sf3a1	ENSMUSG00000002129	Hurt et al. 2013	siUPF1, CHX, UPF1-CLIP	mouse ES	siUPF1-Up
Rqcd1	ENSMUSG00000026174	Hurt et al. 2013	siUPF1, CHX, UPF1-CLIP	mouse ES	siUPF1-Up
Rpa2	ENSMUSG00000028884	Hurt et al. 2013	siUPF1, CHX, UPF1-CLIP	mouse ES	siUPF1-Up
Rnf168	ENSMUSG00000014074	Hurt et al. 2013	siUPF1, CHX, UPF1-CLIP	mouse ES	siUPF1-Up
Rdx	ENSMUSG00000032050	Hurt et al. 2013	siUPF1, CHX, UPF1-CLIP	mouse ES	siUPF1-Up
Rcc1	ENSMUSG00000028896	Hurt et al. 2013	siUPF1, CHX, UPF1-CLIP	mouse ES	siUPF1-Up
Rassf3	ENSMUSG00000025795	Hurt et al. 2013	siUPF1, CHX, UPF1-CLIP	mouse ES	siUPF1-Up
Rabgap1	ENSMUSG00000035437	Hurt et al. 2013	siUPF1, CHX, UPF1-CLIP	mouse ES	siUPF1-Up
Pygo2	ENSMUSG00000047824	Hurt et al. 2013	siUPF1, CHX, UPF1-CLIP	mouse ES	siUPF1-Up
Ppcs	ENSMUSG00000028636	Hurt et al. 2013	siUPF1, CHX, UPF1-CLIP	mouse ES	siUPF1-Up
Pitpnb	ENSMUSG00000050017	Hurt et al. 2013	siUPF1, CHX, UPF1-CLIP	mouse ES	siUPF1-Up
Parvb	ENSMUSG00000022438	Hurt et al. 2013	siUPF1, CHX, UPF1-CLIP	mouse ES	siUPF1-Up
Ormdl3	ENSMUSG00000038150	Hurt et al. 2013	siUPF1, CHX, UPF1-CLIP	mouse ES	siUPF1-Up
nek2	ENSMUSG00000026622	Hurt et al. 2013	siUPF1, CHX, UPF1-CLIP	mouse ES	siUPF1-Up
n/a	ENSMUSG00000056300	Hurt et al. 2013	siUPF1, CHX, UPF1-CLIP	mouse ES	siUPF1-Up
mKIAA1835	ENSMUSG00000022391	Hurt et al. 2013	siUPF1, CHX, UPF1-CLIP	mouse ES	siUPF1-Up
mKIAA1376	ENSMUSG00000074794	Hurt et al. 2013	siUPF1, CHX, UPF1-CLIP	mouse ES	siUPF1-Up
Mcm10	ENSMUSG00000026669	Hurt et al. 2013	siUPF1, CHX, UPF1-CLIP	mouse ES	siUPF1-Up
Kpna1	ENSMUSG00000022905	Hurt et al. 2013	siUPF1, CHX, UPF1-CLIP	mouse ES	siUPF1-Up
Ipo8	ENSMUSG00000040029	Hurt et al. 2013	siUPF1, CHX, UPF1-CLIP	mouse ES	siUPF1-Up
Gpr107	ENSMUSG00000000194	Hurt et al. 2013	siUPF1, CHX, UPF1-CLIP	mouse ES	siUPF1-Up
Gpn1	ENSMUSG00000064037	Hurt et al. 2013	siUPF1, CHX, UPF1-CLIP	mouse ES	siUPF1-Up
G3bp2	ENSMUSG00000029405	Hurt et al. 2013	siUPF1, CHX, UPF1-CLIP	mouse ES	siUPF1-Up
Fyttd1	ENSMUSG00000022800	Hurt et al. 2013	siUPF1, CHX, UPF1-CLIP	mouse ES	siUPF1-Up
Fnip2	ENSMUSG00000061175	Hurt et al. 2013	siUPF1, CHX, UPF1-CLIP	mouse ES	siUPF1-Up
Etnk1	ENSMUSG00000030275	Hurt et al. 2013	siUPF1, CHX, UPF1-CLIP	mouse ES	siUPF1-Up
Esrrb	ENSMUSG00000021255	Hurt et al. 2013	siUPF1, CHX, UPF1-CLIP	mouse ES	siUPF1-Up
Dnajc7	ENSMUSG00000014195	Hurt et al. 2013	siUPF1, CHX, UPF1-CLIP	mouse ES	siUPF1-Up
Dnajc5	ENSMUSG00000000826	Hurt et al. 2013	siUPF1, CHX, UPF1-CLIP	mouse ES	siUPF1-Up
Ddi2	ENSMUSG00000078515	Hurt et al. 2013	siUPF1, CHX, UPF1-CLIP	mouse ES	siUPF1-Up
Dcaf7	ENSMUSG00000049354	Hurt et al. 2013	siUPF1, CHX, UPF1-CLIP	mouse ES	siUPF1-Up
Cog3	ENSMUSG00000034893	Hurt et al. 2013	siUPF1, CHX, UPF1-CLIP	mouse ES	siUPF1-Up
Cdca7	ENSMUSG00000055612	Hurt et al. 2013	siUPF1, CHX, UPF1-CLIP	mouse ES	siUPF1-Up
Cdc25a	ENSMUSG00000032477	Hurt et al. 2013	siUPF1, CHX, UPF1-CLIP	mouse ES	siUPF1-Up
Ccdc25	ENSMUSG00000022035	Hurt et al. 2013	siUPF1, CHX, UPF1-CLIP	mouse ES	siUPF1-Up
B3gnt7	ENSMUSG00000079445	Hurt et al. 2013	siUPF1, CHX, UPF1-CLIP	mouse ES	siUPF1-Up
Atxn7l3	ENSMUSG00000059995	Hurt et al. 2013	siUPF1, CHX, UPF1-CLIP	mouse ES	siUPF1-Up
Arrdc4	ENSMUSG00000042659	Hurt et al. 2013	siUPF1, CHX, UPF1-CLIP	mouse ES	siUPF1-Up
AK158379	ENSMUSG00000039067	Hurt et al. 2013	siUPF1, CHX, UPF1-CLIP	mouse ES	siUPF1-Up
Adipor2	ENSMUSG00000030168	Hurt et al. 2013	siUPF1, CHX, UPF1-CLIP	mouse ES	siUPF1-Up
Aagab	ENSMUSG00000037257	Hurt et al. 2013	siUPF1, CHX, UPF1-CLIP	mouse ES	siUPF1-Up
Xist	ENSMUSG00000086503	Mao et al. 2016	MagohMos2/+, RNA-seq	mouse E10.5 neocortices	EJC mutant-up
Eda2r	ENSMUSG00000034457	Mao et al. 2016	MagohMos2/+, RNA-seq	mouse E10.5 neocortices	EJC mutant-up
Trp53cor1	ENSMUSG00000085912	Mao et al. 2016	MagohMos2/+, RNA-seq	mouse E10.5 neocortices	EJC mutant-up
Cdkn1a	ENSMUSG00000023067	Mao et al. 2016	MagohMos2/+, RNA-seq	mouse E10.5 neocortices	EJC mutant-up
Ccng1	ENSMUSG00000020326	Mao et al. 2016	MagohMos2/+, RNA-seq	mouse E10.5 neocortices	EJC mutant-up
Phlda3	ENSMUSG00000041801	Mao et al. 2016	MagohMos2/+, RNA-seq	mouse E10.5 neocortices	EJC mutant-up
Ano3	ENSMUSG00000074968	Mao et al. 2016	MagohMos2/+, RNA-seq	mouse E10.5 neocortices	EJC mutant-up
2410006H16Rik	ENSMUSG00000086841	Mao et al. 2016	MagohMos2/+, RNA-seq	mouse E10.5 neocortices	EJC mutant-up
Sesn2	ENSMUSG00000028893	Mao et al. 2016	MagohMos2/+, RNA-seq	mouse E10.5 neocortices	EJC mutant-up
Zfp365	ENSMUSG00000037855	Mao et al. 2016	MagohMos2/+, RNA-seq	mouse E10.5 neocortices	EJC mutant-up
4930429B21Rik	ENSMUSG00000049507	Mao et al. 2016	MagohMos2/+, RNA-seq	mouse E10.5 neocortices	EJC mutant-up
AC126552.1	ENSMUSG00000097039	Mao et al. 2016	MagohMos2/+, RNA-seq	mouse E10.5 neocortices	EJC mutant-up
6530418L21Rik	ENSMUSG00000048458	Mao et al. 2016	MagohMos2/+, RNA-seq	mouse E10.5 neocortices	EJC mutant-up
Klhdc7a	ENSMUSG00000078234	Mao et al. 2016	MagohMos2/+, RNA-seq	mouse E10.5 neocortices	EJC mutant-up
B230120H23Rik	ENSMUSG00000004085	Mao et al. 2016	MagohMos2/+, RNA-seq	mouse E10.5 neocortices	EJC mutant-up
Tnfrsf10b	ENSMUSG00000022074	Mao et al. 2016	MagohMos2/+, RNA-seq	mouse E10.5 neocortices	EJC mutant-up
Gm11974,SNORA9	ENSMUSG00000085156	Mao et al. 2016	MagohMos2/+, RNA-seq	mouse E10.5 neocortices	EJC mutant-up
Hbb-b1	ENSMUSG00000052305	Mao et al. 2016	MagohMos2/+, RNA-seq	mouse E10.5 neocortices	EJC mutant-up
Prtg	ENSMUSG00000036030	Mao et al. 2016	MagohMos2/+, RNA-seq	mouse E10.5 neocortices	EJC mutant-up
Irs4	ENSMUSG00000054667	Mao et al. 2016	MagohMos2/+, RNA-seq	mouse E10.5 neocortices	EJC mutant-up
Hmha1	ENSMUSG00000035697	Mao et al. 2016	MagohMos2/+, RNA-seq	mouse E10.5 neocortices	EJC mutant-up
4632434I11Rik	ENSMUSG00000030641	Mao et al. 2016	MagohMos2/+, RNA-seq	mouse E10.5 neocortices	EJC mutant-up
Mt2	ENSMUSG00000031762	Mao et al. 2016	MagohMos2/+, RNA-seq	mouse E10.5 neocortices	EJC mutant-up
Plcg2	ENSMUSG00000034330	Mao et al. 2016	MagohMos2/+, RNA-seq	mouse E10.5 neocortices	EJC mutant-up
Bax	ENSMUSG00000003873	Mao et al. 2016	MagohMos2/+, RNA-seq	mouse E10.5 neocortices	EJC mutant-up
Trim71	ENSMUSG00000079259	Mao et al. 2016	MagohMos2/+, RNA-seq	mouse E10.5 neocortices	EJC mutant-up
Trp53inp1	ENSMUSG00000028211	Mao et al. 2016	MagohMos2/+, RNA-seq	mouse E10.5 neocortices	EJC mutant-up
Serpine2	ENSMUSG00000026249	Mao et al. 2016	MagohMos2/+, RNA-seq	mouse E10.5 neocortices	EJC mutant-up
Gtse1	ENSMUSG00000022385	Mao et al. 2016	MagohMos2/+, RNA-seq	mouse E10.5 neocortices	EJC mutant-up
Mt1	ENSMUSG00000031765	Mao et al. 2016	MagohMos2/+, RNA-seq	mouse E10.5 neocortices	EJC mutant-up
Ptpn14	ENSMUSG00000026604	Mao et al. 2016	MagohMos2/+, RNA-seq	mouse E10.5 neocortices	EJC mutant-up
Rps27l	ENSMUSG00000036781	Mao et al. 2016	MagohMos2/+, RNA-seq	mouse E10.5 neocortices	EJC mutant-up
Lin28b	ENSMUSG00000063804	Mao et al. 2016	MagohMos2/+, RNA-seq	mouse E10.5 neocortices	EJC mutant-up
Rpl22l1	ENSMUSG00000039221	Mao et al. 2016	MagohMos2/+, RNA-seq	mouse E10.5 neocortices	EJC mutant-up
Cdc34	ENSMUSG00000020307	Mao et al. 2016	MagohMos2/+, RNA-seq	mouse E10.5 neocortices	EJC mutant-up
Emb	ENSMUSG00000021728	Mao et al. 2016	MagohMos2/+, RNA-seq	mouse E10.5 neocortices	EJC mutant-up
Tbx20	ENSMUSG00000031965	Mao et al. 2016	Emx1-Cre;Rbm8alox/+, RNA-seq	mouse E10.5 neocortices	EJC mutant-up
Shh	ENSMUSG00000002633	Mao et al. 2016	Emx1-Cre;Rbm8alox/+, RNA-seq	mouse E10.5 neocortices	EJC mutant-up
Vax2os	ENSMUSG00000085794	Mao et al. 2016	Emx1-Cre;Rbm8alox/+, RNA-seq	mouse E10.5 neocortices	EJC mutant-up
Foxe3	ENSMUSG00000044518	Mao et al. 2016	Emx1-Cre;Rbm8alox/+, RNA-seq	mouse E10.5 neocortices	EJC mutant-up
Slc38a8	ENSMUSG00000034224	Mao et al. 2016	Emx1-Cre;Rbm8alox/+, RNA-seq	mouse E10.5 neocortices	EJC mutant-up
Vgll2	ENSMUSG00000049641	Mao et al. 2016	Emx1-Cre;Rbm8alox/+, RNA-seq	mouse E10.5 neocortices	EJC mutant-up
AC134530.1	ENSMUSG00000097453	Mao et al. 2016	Emx1-Cre;Rbm8alox/+, RNA-seq	mouse E10.5 neocortices	EJC mutant-up
Wnt2	ENSMUSG00000010797	Mao et al. 2016	Emx1-Cre;Rbm8alox/+, RNA-seq	mouse E10.5 neocortices	EJC mutant-up
Aldh1a1	ENSMUSG00000053279	Mao et al. 2016	Emx1-Cre;Rbm8alox/+, RNA-seq	mouse E10.5 neocortices	EJC mutant-up
Otp	ENSMUSG00000021685	Mao et al. 2016	Emx1-Cre;Rbm8alox/+, RNA-seq	mouse E10.5 neocortices	EJC mutant-up
Nkx2-2	ENSMUSG00000027434	Mao et al. 2016	Emx1-Cre;Rbm8alox/+, RNA-seq	mouse E10.5 neocortices	EJC mutant-up
Vax2	ENSMUSG00000034777	Mao et al. 2016	Emx1-Cre;Rbm8alox/+, RNA-seq	mouse E10.5 neocortices	EJC mutant-up
6430503K07Rik	ENSMUSG00000053545	Mao et al. 2016	Emx1-Cre;Rbm8alox/+, RNA-seq	mouse E10.5 neocortices	EJC mutant-up
Vsx2	ENSMUSG00000021239	Mao et al. 2016	Emx1-Cre;Rbm8alox/+, RNA-seq	mouse E10.5 neocortices	EJC mutant-up
Rax	ENSMUSG00000024518	Mao et al. 2016	Emx1-Cre;Rbm8alox/+, RNA-seq	mouse E10.5 neocortices	EJC mutant-up
Tyrp1	ENSMUSG00000005994	Mao et al. 2016	Emx1-Cre;Rbm8alox/+, RNA-seq	mouse E10.5 neocortices	EJC mutant-up
Cplx3	ENSMUSG00000039714	Mao et al. 2016	Emx1-Cre;Rbm8alox/+, RNA-seq	mouse E10.5 neocortices	EJC mutant-up
Nkx2-9	ENSMUSG00000058669	Mao et al. 2016	Emx1-Cre;Rbm8alox/+, RNA-seq	mouse E10.5 neocortices	EJC mutant-up
Trpm1	ENSMUSG00000030523	Mao et al. 2016	Emx1-Cre;Rbm8alox/+, RNA-seq	mouse E10.5 neocortices	EJC mutant-up
Gpr50	ENSMUSG00000056380	Mao et al. 2016	Emx1-Cre;Rbm8alox/+, RNA-seq	mouse E10.5 neocortices	EJC mutant-up
Gm14046	ENSMUSG00000084328	Mao et al. 2016	Emx1-Cre;Rbm8alox/+, RNA-seq	mouse E10.5 neocortices	EJC mutant-up
3425401B19Rik	ENSMUSG00000071540	Mao et al. 2016	Emx1-Cre;Rbm8alox/+, RNA-seq	mouse E10.5 neocortices	EJC mutant-up
A730049H05Rik	ENSMUSG00000048636	Mao et al. 2016	Emx1-Cre;Rbm8alox/+, RNA-seq	mouse E10.5 neocortices	EJC mutant-up
Clec18a	ENSMUSG00000033633	Mao et al. 2016	Emx1-Cre;Rbm8alox/+, RNA-seq	mouse E10.5 neocortices	EJC mutant-up
Pmel	ENSMUSG00000025359	Mao et al. 2016	Emx1-Cre;Rbm8alox/+, RNA-seq	mouse E10.5 neocortices	EJC mutant-up
Lrrc69	ENSMUSG00000023151	Mao et al. 2016	Emx1-Cre;Rbm8alox/+, RNA-seq	mouse E10.5 neocortices	EJC mutant-up
Lhx8	ENSMUSG00000096225	Mao et al. 2016	Emx1-Cre;Rbm8alox/+, RNA-seq	mouse E10.5 neocortices	EJC mutant-up
Mab21l2	ENSMUSG00000057777	Mao et al. 2016	Emx1-Cre;Rbm8alox/+, RNA-seq	mouse E10.5 neocortices	EJC mutant-up
Gm9839	ENSMUSG00000049830	Mao et al. 2016	Emx1-Cre;Rbm8alox/+, RNA-seq	mouse E10.5 neocortices	EJC mutant-up
RP23-136M3.8	ENSMUSG00000098172	Mao et al. 2016	Emx1-Cre;Rbm8alox/+, RNA-seq	mouse E10.5 neocortices	EJC mutant-up
Aldh1a7	ENSMUSG00000024747	Mao et al. 2016	Emx1-Cre;Rbm8alox/+, RNA-seq	mouse E10.5 neocortices	EJC mutant-up
Lgr5	ENSMUSG00000020140	Mao et al. 2016	Emx1-Cre;Rbm8alox/+, RNA-seq	mouse E10.5 neocortices	EJC mutant-up
Gsx1	ENSMUSG00000053129	Mao et al. 2016	Emx1-Cre;Rbm8alox/+, RNA-seq	mouse E10.5 neocortices	EJC mutant-up
6330403A02Rik	ENSMUSG00000053963	Mao et al. 2016	Emx1-Cre;Rbm8alox/+, RNA-seq	mouse E10.5 neocortices	EJC mutant-up
Cyp26c1	ENSMUSG00000062432	Mao et al. 2016	Emx1-Cre;Rbm8alox/+, RNA-seq	mouse E10.5 neocortices	EJC mutant-up
Ret	ENSMUSG00000030110	Mao et al. 2016	Emx1-Cre;Rbm8alox/+, RNA-seq	mouse E10.5 neocortices	EJC mutant-up
Pkd2l1	ENSMUSG00000037578	Mao et al. 2016	Emx1-Cre;Rbm8alox/+, RNA-seq	mouse E10.5 neocortices	EJC mutant-up
Omg	ENSMUSG00000049612	Mao et al. 2016	Emx1-Cre;Rbm8alox/+, RNA-seq	mouse E10.5 neocortices	EJC mutant-up
Cryge	ENSMUSG00000070870	Mao et al. 2016	Emx1-Cre;Rbm8alox/+, RNA-seq	mouse E10.5 neocortices	EJC mutant-up
Hhip	ENSMUSG00000064325	Mao et al. 2016	Emx1-Cre;Rbm8alox/+, RNA-seq	mouse E10.5 neocortices	EJC mutant-up
Sim1	ENSMUSG00000019913	Mao et al. 2016	Emx1-Cre;Rbm8alox/+, RNA-seq	mouse E10.5 neocortices	EJC mutant-up
Gpr17	ENSMUSG00000052229	Mao et al. 2016	Emx1-Cre;Rbm8alox/+, RNA-seq	mouse E10.5 neocortices	EJC mutant-up
Bhlhe23	ENSMUSG00000045493	Mao et al. 2016	Emx1-Cre;Rbm8alox/+, RNA-seq	mouse E10.5 neocortices	EJC mutant-up
Spon1	ENSMUSG00000038156	Mao et al. 2016	Emx1-Cre;Rbm8alox/+, RNA-seq	mouse E10.5 neocortices	EJC mutant-up
D930028M14Rik	ENSMUSG00000074274	Mao et al. 2016	Emx1-Cre;Rbm8alox/+, RNA-seq	mouse E10.5 neocortices	EJC mutant-up
Gm5415	ENSMUSG00000091318	Mao et al. 2016	Emx1-Cre;Rbm8alox/+, RNA-seq	mouse E10.5 neocortices	EJC mutant-up
Nts	ENSMUSG00000019890	Mao et al. 2016	Emx1-Cre;Rbm8alox/+, RNA-seq	mouse E10.5 neocortices	EJC mutant-up
Eda2r	ENSMUSG00000034457	Mao et al. 2016	Emx1-Cre;Rbm8alox/+, RNA-seq	mouse E10.5 neocortices	EJC mutant-up
Jakmip3	ENSMUSG00000056856	Mao et al. 2016	Emx1-Cre;Rbm8alox/+, RNA-seq	mouse E10.5 neocortices	EJC mutant-up
Dach2	ENSMUSG00000025592	Mao et al. 2016	Emx1-Cre;Rbm8alox/+, RNA-seq	mouse E10.5 neocortices	EJC mutant-up
Gm16353	ENSMUSG00000089651	Mao et al. 2016	Emx1-Cre;Rbm8alox/+, RNA-seq	mouse E10.5 neocortices	EJC mutant-up
Cyp26a1	ENSMUSG00000024987	Mao et al. 2016	Emx1-Cre;Rbm8alox/+, RNA-seq	mouse E10.5 neocortices	EJC mutant-up
Gm11549	ENSMUSG00000085007	Mao et al. 2016	Emx1-Cre;Rbm8alox/+, RNA-seq	mouse E10.5 neocortices	EJC mutant-up
Galnt9	ENSMUSG00000033316	Mao et al. 2016	Emx1-Cre;Rbm8alox/+, RNA-seq	mouse E10.5 neocortices	EJC mutant-up
Gm25788	ENSMUSG00000064655	Mao et al. 2016	Emx1-Cre;Rbm8alox/+, RNA-seq	mouse E10.5 neocortices	EJC mutant-up
Prdm13	ENSMUSG00000040478	Mao et al. 2016	Emx1-Cre;Rbm8alox/+, RNA-seq	mouse E10.5 neocortices	EJC mutant-up
Gm13577	ENSMUSG00000082127	Mao et al. 2016	Emx1-Cre;Rbm8alox/+, RNA-seq	mouse E10.5 neocortices	EJC mutant-up
Epha10	ENSMUSG00000028876	Mao et al. 2016	Emx1-Cre;Rbm8alox/+, RNA-seq	mouse E10.5 neocortices	EJC mutant-up
Gm15662	ENSMUSG00000089855	Mao et al. 2016	Emx1-Cre;Rbm8alox/+, RNA-seq	mouse E10.5 neocortices	EJC mutant-up
Gm24187	ENSMUSG00000088609	Mao et al. 2016	Emx1-Cre;Rbm8alox/+, RNA-seq	mouse E10.5 neocortices	EJC mutant-up
Grm2	ENSMUSG00000023192	Mao et al. 2016	Emx1-Cre;Rbm8alox/+, RNA-seq	mouse E10.5 neocortices	EJC mutant-up
Snord16a	ENSMUSG00000094411	Mao et al. 2016	Emx1-Cre;Rbm8alox/+, RNA-seq	mouse E10.5 neocortices	EJC mutant-up
Gm22215	ENSMUSG00000088183	Mao et al. 2016	Emx1-Cre;Rbm8alox/+, RNA-seq	mouse E10.5 neocortices	EJC mutant-up
Gm24270	ENSMUSG00000076281	Mao et al. 2016	Emx1-Cre;Rbm8alox/+, RNA-seq	mouse E10.5 neocortices	EJC mutant-up
Mctp1	ENSMUSG00000021596	Mao et al. 2016	Emx1-Cre;Rbm8alox/+, RNA-seq	mouse E10.5 neocortices	EJC mutant-up
Olig2	ENSMUSG00000039830	Mao et al. 2016	Emx1-Cre;Rbm8alox/+, RNA-seq	mouse E10.5 neocortices	EJC mutant-up
RP23-81C12.3	ENSMUSG00000098178	Mao et al. 2016	Emx1-Cre;Rbm8alox/+, RNA-seq	mouse E10.5 neocortices	EJC mutant-up
Lars2	ENSMUSG00000035202	Mao et al. 2016	Emx1-Cre;Rbm8alox/+, RNA-seq	mouse E10.5 neocortices	EJC mutant-up
Cntn6	ENSMUSG00000030092	Mao et al. 2016	Emx1-Cre;Rbm8alox/+, RNA-seq	mouse E10.5 neocortices	EJC mutant-up
Gm9873	ENSMUSG00000052368	Mao et al. 2016	Emx1-Cre;Rbm8alox/+, RNA-seq	mouse E10.5 neocortices	EJC mutant-up
Dbx1	ENSMUSG00000030507	Mao et al. 2016	Emx1-Cre;Rbm8alox/+, RNA-seq	mouse E10.5 neocortices	EJC mutant-up
Sytl2	ENSMUSG00000030616	Mao et al. 2016	Emx1-Cre;Rbm8alox/+, RNA-seq	mouse E10.5 neocortices	EJC mutant-up
9130410C08Rik	ENSMUSG00000085323	Mao et al. 2016	Emx1-Cre;Rbm8alox/+, RNA-seq	mouse E10.5 neocortices	EJC mutant-up
Trp53cor1	ENSMUSG00000085912	Mao et al. 2016	Emx1-Cre;Rbm8alox/+, RNA-seq	mouse E10.5 neocortices	EJC mutant-up
Sowaha	ENSMUSG00000044352	Mao et al. 2016	Emx1-Cre;Rbm8alox/+, RNA-seq	mouse E10.5 neocortices	EJC mutant-up
Gm22641	ENSMUSG00000093098	Mao et al. 2016	Emx1-Cre;Rbm8alox/+, RNA-seq	mouse E10.5 neocortices	EJC mutant-up
Gja5	ENSMUSG00000057123	Mao et al. 2016	Emx1-Cre;Rbm8alox/+, RNA-seq	mouse E10.5 neocortices	EJC mutant-up
Phlda3	ENSMUSG00000041801	Mao et al. 2016	Emx1-Cre;Rbm8alox/+, RNA-seq	mouse E10.5 neocortices	EJC mutant-up
Gm15564	ENSMUSG00000086324	Mao et al. 2016	Emx1-Cre;Rbm8alox/+, RNA-seq	mouse E10.5 neocortices	EJC mutant-up
Gm9027	ENSMUSG00000092029	Mao et al. 2016	Emx1-Cre;Rbm8alox/+, RNA-seq	mouse E10.5 neocortices	EJC mutant-up
Des	ENSMUSG00000026208	Mao et al. 2016	Emx1-Cre;Rbm8alox/+, RNA-seq	mouse E10.5 neocortices	EJC mutant-up
Snord58b	ENSMUSG00000064871	Mao et al. 2016	Emx1-Cre;Rbm8alox/+, RNA-seq	mouse E10.5 neocortices	EJC mutant-up
Lin28a	ENSMUSG00000050966	Mao et al. 2016	Emx1-Cre;Rbm8alox/+, RNA-seq	mouse E10.5 neocortices	EJC mutant-up
Doc2b	ENSMUSG00000020848	Mao et al. 2016	Emx1-Cre;Rbm8alox/+, RNA-seq	mouse E10.5 neocortices	EJC mutant-up
Isg20	ENSMUSG00000039236	Mao et al. 2016	Emx1-Cre;Rbm8alox/+, RNA-seq	mouse E10.5 neocortices	EJC mutant-up
Mir5105	ENSMUSG00000093077	Mao et al. 2016	Emx1-Cre;Rbm8alox/+, RNA-seq	mouse E10.5 neocortices	EJC mutant-up
Gm23935	ENSMUSG00000076258	Mao et al. 2016	Emx1-Cre;Rbm8alox/+, RNA-seq	mouse E10.5 neocortices	EJC mutant-up
Lhx6	ENSMUSG00000026890	Mao et al. 2016	Emx1-Cre;Rbm8alox/+, RNA-seq	mouse E10.5 neocortices	EJC mutant-up
Th	ENSMUSG00000000214	Mao et al. 2016	Emx1-Cre;Rbm8alox/+, RNA-seq	mouse E10.5 neocortices	EJC mutant-up
Crym	ENSMUSG00000030905	Mao et al. 2016	Emx1-Cre;Rbm8alox/+, RNA-seq	mouse E10.5 neocortices	EJC mutant-up
2410006H16Rik	ENSMUSG00000086841	Mao et al. 2016	Emx1-Cre;Rbm8alox/+, RNA-seq	mouse E10.5 neocortices	EJC mutant-up
Rtl1	ENSMUSG00000085925	Mao et al. 2016	Emx1-Cre;Rbm8alox/+, RNA-seq	mouse E10.5 neocortices	EJC mutant-up
Dlk1	ENSMUSG00000040856	Mao et al. 2016	Emx1-Cre;Rbm8alox/+, RNA-seq	mouse E10.5 neocortices	EJC mutant-up
Mir301	ENSMUSG00000065589	Mao et al. 2016	Emx1-Cre;Rbm8alox/+, RNA-seq	mouse E10.5 neocortices	EJC mutant-up
Ptch1	ENSMUSG00000021466	Mao et al. 2016	Emx1-Cre;Rbm8alox/+, RNA-seq	mouse E10.5 neocortices	EJC mutant-up
Ccng1	ENSMUSG00000020326	Mao et al. 2016	Emx1-Cre;Rbm8alox/+, RNA-seq	mouse E10.5 neocortices	EJC mutant-up
Ano3	ENSMUSG00000074968	Mao et al. 2016	Emx1-Cre;Rbm8alox/+, RNA-seq	mouse E10.5 neocortices	EJC mutant-up
Ptch2	ENSMUSG00000028681	Mao et al. 2016	Emx1-Cre;Rbm8alox/+, RNA-seq	mouse E10.5 neocortices	EJC mutant-up
Tmem200b	ENSMUSG00000070720	Mao et al. 2016	Emx1-Cre;Rbm8alox/+, RNA-seq	mouse E10.5 neocortices	EJC mutant-up
Fzd5	ENSMUSG00000045005	Mao et al. 2016	Emx1-Cre;Rbm8alox/+, RNA-seq	mouse E10.5 neocortices	EJC mutant-up
Fignl2	ENSMUSG00000095440	Mao et al. 2016	Emx1-Cre;Rbm8alox/+, RNA-seq	mouse E10.5 neocortices	EJC mutant-up
Lmo1	ENSMUSG00000036111	Mao et al. 2016	Emx1-Cre;Rbm8alox/+, RNA-seq	mouse E10.5 neocortices	EJC mutant-up
Gli1	ENSMUSG00000025407	Mao et al. 2016	Emx1-Cre;Rbm8alox/+, RNA-seq	mouse E10.5 neocortices	EJC mutant-up
Fst	ENSMUSG00000021765	Mao et al. 2016	Emx1-Cre;Rbm8alox/+, RNA-seq	mouse E10.5 neocortices	EJC mutant-up
Gm9800	ENSMUSG00000045799	Mao et al. 2016	Emx1-Cre;Rbm8alox/+, RNA-seq	mouse E10.5 neocortices	EJC mutant-up
Greb1l	ENSMUSG00000042942	Mao et al. 2016	Emx1-Cre;Rbm8alox/+, RNA-seq	mouse E10.5 neocortices	EJC mutant-up
Stk32c	ENSMUSG00000015981	Mao et al. 2016	Emx1-Cre;Rbm8alox/+, RNA-seq	mouse E10.5 neocortices	EJC mutant-up
Ptprn2	ENSMUSG00000056553	Mao et al. 2016	Emx1-Cre;Rbm8alox/+, RNA-seq	mouse E10.5 neocortices	EJC mutant-up
Gm13245	ENSMUSG00000081998	Mao et al. 2016	Emx1-Cre;Rbm8alox/+, RNA-seq	mouse E10.5 neocortices	EJC mutant-up
Pou2f2	ENSMUSG00000008496	Mao et al. 2016	Emx1-Cre;Rbm8alox/+, RNA-seq	mouse E10.5 neocortices	EJC mutant-up
Sfrp2	ENSMUSG00000027996	Mao et al. 2016	Emx1-Cre;Rbm8alox/+, RNA-seq	mouse E10.5 neocortices	EJC mutant-up
Gm6451	ENSMUSG00000084166	Mao et al. 2016	Emx1-Cre;Rbm8alox/+, RNA-seq	mouse E10.5 neocortices	EJC mutant-up
Ptprn	ENSMUSG00000026204	Mao et al. 2016	Emx1-Cre;Rbm8alox/+, RNA-seq	mouse E10.5 neocortices	EJC mutant-up
Sesn2	ENSMUSG00000028893	Mao et al. 2016	Emx1-Cre;Rbm8alox/+, RNA-seq	mouse E10.5 neocortices	EJC mutant-up
Bbc3	ENSMUSG00000002083	Mao et al. 2016	Emx1-Cre;Rbm8alox/+, RNA-seq	mouse E10.5 neocortices	EJC mutant-up
Magel2	ENSMUSG00000056972	Mao et al. 2016	Emx1-Cre;Rbm8alox/+, RNA-seq	mouse E10.5 neocortices	EJC mutant-up
Gm11974	ENSMUSG00000085156	Mao et al. 2016	Emx1-Cre;Rbm8alox/+, RNA-seq	mouse E10.5 neocortices	EJC mutant-up
Tmtc2	ENSMUSG00000036019	Mao et al. 2016	Emx1-Cre;Rbm8alox/+, RNA-seq	mouse E10.5 neocortices	EJC mutant-up
Ak1	ENSMUSG00000026817	Mao et al. 2016	Emx1-Cre;Rbm8alox/+, RNA-seq	mouse E10.5 neocortices	EJC mutant-up
Gm7862	ENSMUSG00000046580	Mao et al. 2016	Emx1-Cre;Rbm8alox/+, RNA-seq	mouse E10.5 neocortices	EJC mutant-up
Tox2	ENSMUSG00000074607	Mao et al. 2016	Emx1-Cre;Rbm8alox/+, RNA-seq	mouse E10.5 neocortices	EJC mutant-up
Prox1	ENSMUSG00000010175	Mao et al. 2016	Emx1-Cre;Rbm8alox/+, RNA-seq	mouse E10.5 neocortices	EJC mutant-up
Rpl22l1	ENSMUSG00000039221	Mao et al. 2016	Emx1-Cre;Rbm8alox/+, RNA-seq	mouse E10.5 neocortices	EJC mutant-up
Ngfr	ENSMUSG00000000120	Mao et al. 2016	Emx1-Cre;Rbm8alox/+, RNA-seq	mouse E10.5 neocortices	EJC mutant-up
Elf4	ENSMUSG00000031103	Mao et al. 2016	Emx1-Cre;Rbm8alox/+, RNA-seq	mouse E10.5 neocortices	EJC mutant-up
Mirg	ENSMUSG00000097391	Mao et al. 2016	Emx1-Cre;Rbm8alox/+, RNA-seq	mouse E10.5 neocortices	EJC mutant-up
Lmo3	ENSMUSG00000030226	Mao et al. 2016	Emx1-Cre;Rbm8alox/+, RNA-seq	mouse E10.5 neocortices	EJC mutant-up
Ntn1	ENSMUSG00000020902	Mao et al. 2016	Emx1-Cre;Rbm8alox/+, RNA-seq	mouse E10.5 neocortices	EJC mutant-up
Vwf	ENSMUSG00000001930	Mao et al. 2016	Emx1-Cre;Rbm8alox/+, RNA-seq	mouse E10.5 neocortices	EJC mutant-up
Rian	ENSMUSG00000097451	Mao et al. 2016	Emx1-Cre;Rbm8alox/+, RNA-seq	mouse E10.5 neocortices	EJC mutant-up
Gpr98	ENSMUSG00000069170	Mao et al. 2016	Emx1-Cre;Rbm8alox/+, RNA-seq	mouse E10.5 neocortices	EJC mutant-up
Dpysl4	ENSMUSG00000025478	Mao et al. 2016	Emx1-Cre;Rbm8alox/+, RNA-seq	mouse E10.5 neocortices	EJC mutant-up
Pappa	ENSMUSG00000028370	Mao et al. 2016	Emx1-Cre;Rbm8alox/+, RNA-seq	mouse E10.5 neocortices	EJC mutant-up
Cox6b2	ENSMUSG00000051811	Mao et al. 2016	Emx1-Cre;Rbm8alox/+, RNA-seq	mouse E10.5 neocortices	EJC mutant-up
Mbip	ENSMUSG00000021028	Mao et al. 2016	Emx1-Cre;Rbm8alox/+, RNA-seq	mouse E10.5 neocortices	EJC mutant-up
1810032O08Rik	ENSMUSG00000020812	Mao et al. 2016	Emx1-Cre;Rbm8alox/+, RNA-seq	mouse E10.5 neocortices	EJC mutant-up
Eno3	ENSMUSG00000060600	Mao et al. 2016	Emx1-Cre;Rbm8alox/+, RNA-seq	mouse E10.5 neocortices	EJC mutant-up
Rps14	ENSMUSG00000024608	Mao et al. 2016	Emx1-Cre;Rbm8alox/+, RNA-seq	mouse E10.5 neocortices	EJC mutant-up
Rpl39	ENSMUSG00000079641	Mao et al. 2016	Emx1-Cre;Rbm8alox/+, RNA-seq	mouse E10.5 neocortices	EJC mutant-up
Col22a1	ENSMUSG00000079022	Mao et al. 2016	Emx1-Cre;Rbm8alox/+, RNA-seq	mouse E10.5 neocortices	EJC mutant-up
Nell2	ENSMUSG00000022454	Mao et al. 2016	Emx1-Cre;Rbm8alox/+, RNA-seq	mouse E10.5 neocortices	EJC mutant-up
1500012F01Rik	ENSMUSG00000074578	Mao et al. 2016	Emx1-Cre;Rbm8alox/+, RNA-seq	mouse E10.5 neocortices	EJC mutant-up
Hes5	ENSMUSG00000048001	Mao et al. 2016	Emx1-Cre;Rbm8alox/+, RNA-seq	mouse E10.5 neocortices	EJC mutant-up
Snhg6	ENSMUSG00000098234	Mao et al. 2016	Emx1-Cre;Rbm8alox/+, RNA-seq	mouse E10.5 neocortices	EJC mutant-up
2810008D09Rik	ENSMUSG00000086859	Mao et al. 2016	Emx1-Cre;Rbm8alox/+, RNA-seq	mouse E10.5 neocortices	EJC mutant-up
Arhgef18	ENSMUSG00000004568	Mao et al. 2016	Emx1-Cre;Rbm8alox/+, RNA-seq	mouse E10.5 neocortices	EJC mutant-up
Rab34	ENSMUSG00000002059	Mao et al. 2016	Emx1-Cre;Rbm8alox/+, RNA-seq	mouse E10.5 neocortices	EJC mutant-up
Rpl34	ENSMUSG00000062006	Mao et al. 2016	Emx1-Cre;Rbm8alox/+, RNA-seq	mouse E10.5 neocortices	EJC mutant-up
Rps19	ENSMUSG00000040952	Mao et al. 2016	Emx1-Cre;Rbm8alox/+, RNA-seq	mouse E10.5 neocortices	EJC mutant-up
Shc2	ENSMUSG00000020312	Mao et al. 2016	Emx1-Cre;Rbm8alox/+, RNA-seq	mouse E10.5 neocortices	EJC mutant-up
Rps27l	ENSMUSG00000036781	Mao et al. 2016	Emx1-Cre;Rbm8alox/+, RNA-seq	mouse E10.5 neocortices	EJC mutant-up
Snhg12	ENSMUSG00000086290	Mao et al. 2016	Emx1-Cre;Rbm8alox/+, RNA-seq	mouse E10.5 neocortices	EJC mutant-up
Meg3	ENSMUSG00000021268	Mao et al. 2016	Emx1-Cre;Rbm8alox/+, RNA-seq	mouse E10.5 neocortices	EJC mutant-up
Serpine2	ENSMUSG00000026249	Mao et al. 2016	Emx1-Cre;Rbm8alox/+, RNA-seq	mouse E10.5 neocortices	EJC mutant-up
Aen	ENSMUSG00000030609	Mao et al. 2016	Emx1-Cre;Rbm8alox/+, RNA-seq	mouse E10.5 neocortices	EJC mutant-up
Rpl38-ps2	ENSMUSG00000080921	Mao et al. 2016	Emx1-Cre;Rbm8alox/+, RNA-seq	mouse E10.5 neocortices	EJC mutant-up
Rps18	ENSMUSG00000008668	Mao et al. 2016	Emx1-Cre;Rbm8alox/+, RNA-seq	mouse E10.5 neocortices	EJC mutant-up
Atox1	ENSMUSG00000018585	Mao et al. 2016	Emx1-Cre;Rbm8alox/+, RNA-seq	mouse E10.5 neocortices	EJC mutant-up
Fezf1	ENSMUSG00000029697	Mao et al. 2016	Emx1-Cre;Rbm8alox/+, RNA-seq	mouse E10.5 neocortices	EJC mutant-up
Kcnh2	ENSMUSG00000038319	Mao et al. 2016	Emx1-Cre;Rbm8alox/+, RNA-seq	mouse E10.5 neocortices	EJC mutant-up
Rgs8	ENSMUSG00000042671	Mao et al. 2016	Emx1-Cre;Rbm8alox/+, RNA-seq	mouse E10.5 neocortices	EJC mutant-up
Tub	ENSMUSG00000031028	Mao et al. 2016	Emx1-Cre;Rbm8alox/+, RNA-seq	mouse E10.5 neocortices	EJC mutant-up
Peg10	ENSMUSG00000092035	Mao et al. 2016	Emx1-Cre;Rbm8alox/+, RNA-seq	mouse E10.5 neocortices	EJC mutant-up
Tubgcp5	ENSMUSG00000033790	Mao et al. 2016	Emx1-Cre;Rbm8alox/+, RNA-seq	mouse E10.5 neocortices	EJC mutant-up
Rps21	ENSMUSG00000039001	Mao et al. 2016	Emx1-Cre;Rbm8alox/+, RNA-seq	mouse E10.5 neocortices	EJC mutant-up
Gigyf1	ENSMUSG00000029714	Mao et al. 2016	Emx1-Cre;Rbm8alox/+, RNA-seq	mouse E10.5 neocortices	EJC mutant-up
Wbscr16	ENSMUSG00000061979	Mao et al. 2016	Emx1-Cre;Rbm8alox/+, RNA-seq	mouse E10.5 neocortices	EJC mutant-up
Mkrn3	ENSMUSG00000070527	Mao et al. 2016	Emx1-Cre;Rbm8alox/+, RNA-seq	mouse E10.5 neocortices	EJC mutant-up
Rpl9	ENSMUSG00000047215	Mao et al. 2016	Emx1-Cre;Rbm8alox/+, RNA-seq	mouse E10.5 neocortices	EJC mutant-up
Mapk12	ENSMUSG00000022610	Mao et al. 2016	Emx1-Cre;Rbm8alox/+, RNA-seq	mouse E10.5 neocortices	EJC mutant-up
B230120H23Rik	ENSMUSG00000004085	Mao et al. 2016	Emx1-Cre;Rbm8alox/+, RNA-seq	mouse E10.5 neocortices	EJC mutant-up
Sat1	ENSMUSG00000025283	Mao et al. 2016	Emx1-Cre;Rbm8alox/+, RNA-seq	mouse E10.5 neocortices	EJC mutant-up
Rpl10	ENSMUSG00000008682	Mao et al. 2016	Emx1-Cre;Rbm8alox/+, RNA-seq	mouse E10.5 neocortices	EJC mutant-up
Spsb4	ENSMUSG00000046997	Mao et al. 2016	Emx1-Cre;Rbm8alox/+, RNA-seq	mouse E10.5 neocortices	EJC mutant-up
Rps15a	ENSMUSG00000008683	Mao et al. 2016	Emx1-Cre;Rbm8alox/+, RNA-seq	mouse E10.5 neocortices	EJC mutant-up
Ring1	ENSMUSG00000024325	Mao et al. 2016	Emx1-Cre;Rbm8alox/+, RNA-seq	mouse E10.5 neocortices	EJC mutant-up
Snrpg	ENSMUSG00000057278	Mao et al. 2016	Emx1-Cre;Rbm8alox/+, RNA-seq	mouse E10.5 neocortices	EJC mutant-up
AC025794.1	ENSMUSG00000097188	Mao et al. 2016	Emx1-Cre;Rbm8alox/+, RNA-seq	mouse E10.5 neocortices	EJC mutant-up
Rpl36	ENSMUSG00000057863	Mao et al. 2016	Emx1-Cre;Rbm8alox/+, RNA-seq	mouse E10.5 neocortices	EJC mutant-up
Mir17hg	ENSMUSG00000089726	Mao et al. 2016	Emx1-Cre;Rbm8alox/+, RNA-seq	mouse E10.5 neocortices	EJC mutant-up
Txnip	ENSMUSG00000038393	Mao et al. 2016	Emx1-Cre;Rbm8alox/+, RNA-seq	mouse E10.5 neocortices	EJC mutant-up
Rpl27	ENSMUSG00000063316	Mao et al. 2016	Emx1-Cre;Rbm8alox/+, RNA-seq	mouse E10.5 neocortices	EJC mutant-up
Nubp1	ENSMUSG00000022503	Mao et al. 2016	Emx1-Cre;Rbm8alox/+, RNA-seq	mouse E10.5 neocortices	EJC mutant-up
Adamts3	ENSMUSG00000043635	Mao et al. 2016	Emx1-Cre;Rbm8alox/+, RNA-seq	mouse E10.5 neocortices	EJC mutant-up
Grwd1	ENSMUSG00000053801	Mao et al. 2016	Emx1-Cre;Rbm8alox/+, RNA-seq	mouse E10.5 neocortices	EJC mutant-up
Rfc4	ENSMUSG00000022881	Mao et al. 2016	Emx1-Cre;Rbm8alox/+, RNA-seq	mouse E10.5 neocortices	EJC mutant-up
Uqcr10	ENSMUSG00000059534	Mao et al. 2016	Emx1-Cre;Rbm8alox/+, RNA-seq	mouse E10.5 neocortices	EJC mutant-up
Rgs16	ENSMUSG00000026475	Mao et al. 2016	Emx1-Cre;Rbm8alox/+, RNA-seq	mouse E10.5 neocortices	EJC mutant-up
Gm10736	ENSMUSG00000096842	Mao et al. 2016	Emx1-Cre;Rbm8alox/+, RNA-seq	mouse E10.5 neocortices	EJC mutant-up
Elp6	ENSMUSG00000054836	Mao et al. 2016	Emx1-Cre;Rbm8alox/+, RNA-seq	mouse E10.5 neocortices	EJC mutant-up
1110038B12Rik	ENSMUSG00000092203	Mao et al. 2016	Emx1-Cre;Rbm8alox/+, RNA-seq	mouse E10.5 neocortices	EJC mutant-up
4632434I11Rik	ENSMUSG00000030641	Mao et al. 2016	Emx1-Cre;Rbm8alox/+, RNA-seq	mouse E10.5 neocortices	EJC mutant-up
Psma5	ENSMUSG00000068749	Mao et al. 2016	Emx1-Cre;Rbm8alox/+, RNA-seq	mouse E10.5 neocortices	EJC mutant-up
Bloc1s2a	ENSMUSG00000057506	Mao et al. 2016	Emx1-Cre;Rbm8alox/+, RNA-seq	mouse E10.5 neocortices	EJC mutant-up
Atp5e	ENSMUSG00000016252	Mao et al. 2016	Emx1-Cre;Rbm8alox/+, RNA-seq	mouse E10.5 neocortices	EJC mutant-up
AL732311.1	ENSMUSG00000097052	Mao et al. 2016	Emx1-Cre;Rbm8alox/+, RNA-seq	mouse E10.5 neocortices	EJC mutant-up
Rpl26	ENSMUSG00000060938	Mao et al. 2016	Emx1-Cre;Rbm8alox/+, RNA-seq	mouse E10.5 neocortices	EJC mutant-up
Rps20	ENSMUSG00000028234	Mao et al. 2016	Emx1-Cre;Rbm8alox/+, RNA-seq	mouse E10.5 neocortices	EJC mutant-up
Slc19a2	ENSMUSG00000040918	Mao et al. 2016	Emx1-Cre;Rbm8alox/+, RNA-seq	mouse E10.5 neocortices	EJC mutant-up
Mars	ENSMUSG00000040354	Mao et al. 2016	Emx1-Cre;Rbm8alox/+, RNA-seq	mouse E10.5 neocortices	EJC mutant-up
Rpl37	ENSMUSG00000041841	Mao et al. 2016	Emx1-Cre;Rbm8alox/+, RNA-seq	mouse E10.5 neocortices	EJC mutant-up
Atp5g3	ENSMUSG00000018770	Mao et al. 2016	Emx1-Cre;Rbm8alox/+, RNA-seq	mouse E10.5 neocortices	EJC mutant-up
Get4	ENSMUSG00000025858	Mao et al. 2016	Emx1-Cre;Rbm8alox/+, RNA-seq	mouse E10.5 neocortices	EJC mutant-up
Polr2h	ENSMUSG00000021018	Mao et al. 2016	Emx1-Cre;Rbm8alox/+, RNA-seq	mouse E10.5 neocortices	EJC mutant-up
Snx5	ENSMUSG00000027423	Mao et al. 2016	Emx1-Cre;Rbm8alox/+, RNA-seq	mouse E10.5 neocortices	EJC mutant-up
9430008C03Rik	ENSMUSG00000085385	Mao et al. 2016	Emx1-Cre;Rbm8alox/+, RNA-seq	mouse E10.5 neocortices	EJC mutant-up
Nfxl1	ENSMUSG00000072889	Mao et al. 2016	Emx1-Cre;Rbm8alox/+, RNA-seq	mouse E10.5 neocortices	EJC mutant-up
Rpl38	ENSMUSG00000057322	Mao et al. 2016	Emx1-Cre;Rbm8alox/+, RNA-seq	mouse E10.5 neocortices	EJC mutant-up
Smim7	ENSMUSG00000044600	Mao et al. 2016	Emx1-Cre;Rbm8alox/+, RNA-seq	mouse E10.5 neocortices	EJC mutant-up
Chchd2	ENSMUSG00000070493	Mao et al. 2016	Emx1-Cre;Rbm8alox/+, RNA-seq	mouse E10.5 neocortices	EJC mutant-up
Pdrg1	ENSMUSG00000027472	Mao et al. 2016	Emx1-Cre;Rbm8alox/+, RNA-seq	mouse E10.5 neocortices	EJC mutant-up
Snrpb	ENSMUSG00000027404	Mao et al. 2016	Emx1-Cre;Rbm8alox/+, RNA-seq	mouse E10.5 neocortices	EJC mutant-up
Fam173a	ENSMUSG00000057411	Mao et al. 2016	Emx1-Cre;Rbm8alox/+, RNA-seq	mouse E10.5 neocortices	EJC mutant-up
Eif1	ENSMUSG00000035530	Mao et al. 2016	Emx1-Cre;Rbm8alox/+, RNA-seq	mouse E10.5 neocortices	EJC mutant-up
Ssna1	ENSMUSG00000026966	Mao et al. 2016	Emx1-Cre;Rbm8alox/+, RNA-seq	mouse E10.5 neocortices	EJC mutant-up
Sema4c	ENSMUSG00000026121	Mao et al. 2016	Emx1-Cre;Rbm8alox/+, RNA-seq	mouse E10.5 neocortices	EJC mutant-up
Med22	ENSMUSG00000015776	Mao et al. 2016	Emx1-Cre;Rbm8alox/+, RNA-seq	mouse E10.5 neocortices	EJC mutant-up
Psmb4	ENSMUSG00000005779	Mao et al. 2016	Emx1-Cre;Rbm8alox/+, RNA-seq	mouse E10.5 neocortices	EJC mutant-up
Psmb3	ENSMUSG00000069744	Mao et al. 2016	Emx1-Cre;Rbm8alox/+, RNA-seq	mouse E10.5 neocortices	EJC mutant-up
Psmb5	ENSMUSG00000022193	Mao et al. 2016	Emx1-Cre;Rbm8alox/+, RNA-seq	mouse E10.5 neocortices	EJC mutant-up
Mettl2	ENSMUSG00000020691	Mao et al. 2016	Emx1-Cre;Rbm8alox/+, RNA-seq	mouse E10.5 neocortices	EJC mutant-up
Fau	ENSMUSG00000038274	Mao et al. 2016	Emx1-Cre;Rbm8alox/+, RNA-seq	mouse E10.5 neocortices	EJC mutant-up
Ampd2	ENSMUSG00000027889	Mao et al. 2016	Emx1-Cre;Rbm8alox/+, RNA-seq	mouse E10.5 neocortices	EJC mutant-up
Cox7a2	ENSMUSG00000032330	Mao et al. 2016	Emx1-Cre;Rbm8alox/+, RNA-seq	mouse E10.5 neocortices	EJC mutant-up
Atf4	ENSMUSG00000042406	Mao et al. 2016	Emx1-Cre;Rbm8alox/+, RNA-seq	mouse E10.5 neocortices	EJC mutant-up
Gm13337	ENSMUSG00000081467	Mao et al. 2016	Emx1-Cre;Eif4a3lox/+, RNA-seq	mouse E10.5 neocortices	EJC mutant-up
Gm9855	ENSMUSG00000085666	Mao et al. 2016	Emx1-Cre;Eif4a3lox/+, RNA-seq	mouse E10.5 neocortices	EJC mutant-up
Rps15a-ps8	ENSMUSG00000084403	Mao et al. 2016	Emx1-Cre;Eif4a3lox/+, RNA-seq	mouse E10.5 neocortices	EJC mutant-up
Klk1b22	ENSMUSG00000060177	Mao et al. 2016	Emx1-Cre;Eif4a3lox/+, RNA-seq	mouse E10.5 neocortices	EJC mutant-up
Gm9008	ENSMUSG00000072476	Mao et al. 2016	Emx1-Cre;Eif4a3lox/+, RNA-seq	mouse E10.5 neocortices	EJC mutant-up
Rps13-ps1	ENSMUSG00000066362	Mao et al. 2016	Emx1-Cre;Eif4a3lox/+, RNA-seq	mouse E10.5 neocortices	EJC mutant-up
Rps3a3	ENSMUSG00000059751	Mao et al. 2016	Emx1-Cre;Eif4a3lox/+, RNA-seq	mouse E10.5 neocortices	EJC mutant-up
Gm14287	ENSMUSG00000082329	Mao et al. 2016	Emx1-Cre;Eif4a3lox/+, RNA-seq	mouse E10.5 neocortices	EJC mutant-up
Rps15a-ps2	ENSMUSG00000067351	Mao et al. 2016	Emx1-Cre;Eif4a3lox/+, RNA-seq	mouse E10.5 neocortices	EJC mutant-up
Gm12666	ENSMUSG00000066107	Mao et al. 2016	Emx1-Cre;Eif4a3lox/+, RNA-seq	mouse E10.5 neocortices	EJC mutant-up
Shh	ENSMUSG00000002633	Mao et al. 2016	Emx1-Cre;Eif4a3lox/+, RNA-seq	mouse E10.5 neocortices	EJC mutant-up
Gm11942	ENSMUSG00000094344	Mao et al. 2016	Emx1-Cre;Eif4a3lox/+, RNA-seq	mouse E10.5 neocortices	EJC mutant-up
Gm8778	ENSMUSG00000079223	Mao et al. 2016	Emx1-Cre;Eif4a3lox/+, RNA-seq	mouse E10.5 neocortices	EJC mutant-up
Prap1	ENSMUSG00000025467	Mao et al. 2016	Emx1-Cre;Eif4a3lox/+, RNA-seq	mouse E10.5 neocortices	EJC mutant-up
Tpm3-rs7	ENSMUSG00000058126	Mao et al. 2016	Emx1-Cre;Eif4a3lox/+, RNA-seq	mouse E10.5 neocortices	EJC mutant-up
Rps15a-ps7	ENSMUSG00000081087	Mao et al. 2016	Emx1-Cre;Eif4a3lox/+, RNA-seq	mouse E10.5 neocortices	EJC mutant-up
Gm6685	ENSMUSG00000032889	Mao et al. 2016	Emx1-Cre;Eif4a3lox/+, RNA-seq	mouse E10.5 neocortices	EJC mutant-up
Gm14150	ENSMUSG00000082809	Mao et al. 2016	Emx1-Cre;Eif4a3lox/+, RNA-seq	mouse E10.5 neocortices	EJC mutant-up
Gm6166	ENSMUSG00000074280	Mao et al. 2016	Emx1-Cre;Eif4a3lox/+, RNA-seq	mouse E10.5 neocortices	EJC mutant-up
Gm16251	ENSMUSG00000090075	Mao et al. 2016	Emx1-Cre;Eif4a3lox/+, RNA-seq	mouse E10.5 neocortices	EJC mutant-up
Lrrc69	ENSMUSG00000023151	Mao et al. 2016	Emx1-Cre;Eif4a3lox/+, RNA-seq	mouse E10.5 neocortices	EJC mutant-up
Gm14078	ENSMUSG00000081731	Mao et al. 2016	Emx1-Cre;Eif4a3lox/+, RNA-seq	mouse E10.5 neocortices	EJC mutant-up
AC137902.1	ENSMUSG00000097662	Mao et al. 2016	Emx1-Cre;Eif4a3lox/+, RNA-seq	mouse E10.5 neocortices	EJC mutant-up
Gm15920	ENSMUSG00000080893	Mao et al. 2016	Emx1-Cre;Eif4a3lox/+, RNA-seq	mouse E10.5 neocortices	EJC mutant-up
Rps3a2	ENSMUSG00000062611	Mao et al. 2016	Emx1-Cre;Eif4a3lox/+, RNA-seq	mouse E10.5 neocortices	EJC mutant-up
Gm9839	ENSMUSG00000049830	Mao et al. 2016	Emx1-Cre;Eif4a3lox/+, RNA-seq	mouse E10.5 neocortices	EJC mutant-up
Rpl3-ps1	ENSMUSG00000084349	Mao et al. 2016	Emx1-Cre;Eif4a3lox/+, RNA-seq	mouse E10.5 neocortices	EJC mutant-up
Gm14567	ENSMUSG00000080896	Mao et al. 2016	Emx1-Cre;Eif4a3lox/+, RNA-seq	mouse E10.5 neocortices	EJC mutant-up
Gm14046	ENSMUSG00000084328	Mao et al. 2016	Emx1-Cre;Eif4a3lox/+, RNA-seq	mouse E10.5 neocortices	EJC mutant-up
Gm6472	ENSMUSG00000095597	Mao et al. 2016	Emx1-Cre;Eif4a3lox/+, RNA-seq	mouse E10.5 neocortices	EJC mutant-up
Gm5900	ENSMUSG00000094685	Mao et al. 2016	Emx1-Cre;Eif4a3lox/+, RNA-seq	mouse E10.5 neocortices	EJC mutant-up
Eda2r	ENSMUSG00000034457	Mao et al. 2016	Emx1-Cre;Eif4a3lox/+, RNA-seq	mouse E10.5 neocortices	EJC mutant-up
Gm11868	ENSMUSG00000050550	Mao et al. 2016	Emx1-Cre;Eif4a3lox/+, RNA-seq	mouse E10.5 neocortices	EJC mutant-up
Cryge	ENSMUSG00000070870	Mao et al. 2016	Emx1-Cre;Eif4a3lox/+, RNA-seq	mouse E10.5 neocortices	EJC mutant-up
Gm3608	ENSMUSG00000067017	Mao et al. 2016	Emx1-Cre;Eif4a3lox/+, RNA-seq	mouse E10.5 neocortices	EJC mutant-up
Gm1082	ENSMUSG00000062132	Mao et al. 2016	Emx1-Cre;Eif4a3lox/+, RNA-seq	mouse E10.5 neocortices	EJC mutant-up
Gm13092	ENSMUSG00000085787	Mao et al. 2016	Emx1-Cre;Eif4a3lox/+, RNA-seq	mouse E10.5 neocortices	EJC mutant-up
Eif3s6-ps2	ENSMUSG00000091697	Mao et al. 2016	Emx1-Cre;Eif4a3lox/+, RNA-seq	mouse E10.5 neocortices	EJC mutant-up
Gm8116	ENSMUSG00000059422	Mao et al. 2016	Emx1-Cre;Eif4a3lox/+, RNA-seq	mouse E10.5 neocortices	EJC mutant-up
AA465934	ENSMUSG00000093483	Mao et al. 2016	Emx1-Cre;Eif4a3lox/+, RNA-seq	mouse E10.5 neocortices	EJC mutant-up
Gm13577	ENSMUSG00000082127	Mao et al. 2016	Emx1-Cre;Eif4a3lox/+, RNA-seq	mouse E10.5 neocortices	EJC mutant-up
Snord70	ENSMUSG00000077345	Mao et al. 2016	Emx1-Cre;Eif4a3lox/+, RNA-seq	mouse E10.5 neocortices	EJC mutant-up
Trp53cor1	ENSMUSG00000085912	Mao et al. 2016	Emx1-Cre;Eif4a3lox/+, RNA-seq	mouse E10.5 neocortices	EJC mutant-up
Phlda3	ENSMUSG00000041801	Mao et al. 2016	Emx1-Cre;Eif4a3lox/+, RNA-seq	mouse E10.5 neocortices	EJC mutant-up
Ano3	ENSMUSG00000074968	Mao et al. 2016	Emx1-Cre;Eif4a3lox/+, RNA-seq	mouse E10.5 neocortices	EJC mutant-up
Bend6	ENSMUSG00000042182	Mao et al. 2016	Emx1-Cre;Eif4a3lox/+, RNA-seq	mouse E10.5 neocortices	EJC mutant-up
Wdfy1	ENSMUSG00000073643	Mao et al. 2016	Emx1-Cre;Eif4a3lox/+, RNA-seq	mouse E10.5 neocortices	EJC mutant-up
Gm16503	ENSMUSG00000078160	Mao et al. 2016	Emx1-Cre;Eif4a3lox/+, RNA-seq	mouse E10.5 neocortices	EJC mutant-up
Gm24187	ENSMUSG00000088609	Mao et al. 2016	Emx1-Cre;Eif4a3lox/+, RNA-seq	mouse E10.5 neocortices	EJC mutant-up
Ccng1	ENSMUSG00000020326	Mao et al. 2016	Emx1-Cre;Eif4a3lox/+, RNA-seq	mouse E10.5 neocortices	EJC mutant-up
Efcab7	ENSMUSG00000073791	Mao et al. 2016	Emx1-Cre;Eif4a3lox/+, RNA-seq	mouse E10.5 neocortices	EJC mutant-up
Sesn2	ENSMUSG00000028893	Mao et al. 2016	Emx1-Cre;Eif4a3lox/+, RNA-seq	mouse E10.5 neocortices	EJC mutant-up
Arhgef18	ENSMUSG00000004568	Mao et al. 2016	Emx1-Cre;Eif4a3lox/+, RNA-seq	mouse E10.5 neocortices	EJC mutant-up
Zfp365	ENSMUSG00000037855	Mao et al. 2016	Emx1-Cre;Eif4a3lox/+, RNA-seq	mouse E10.5 neocortices	EJC mutant-up
Bbc3	ENSMUSG00000002083	Mao et al. 2016	Emx1-Cre;Eif4a3lox/+, RNA-seq	mouse E10.5 neocortices	EJC mutant-up
2410006H16Rik	ENSMUSG00000086841	Mao et al. 2016	Emx1-Cre;Eif4a3lox/+, RNA-seq	mouse E10.5 neocortices	EJC mutant-up
Gm9800	ENSMUSG00000045799	Mao et al. 2016	Emx1-Cre;Eif4a3lox/+, RNA-seq	mouse E10.5 neocortices	EJC mutant-up
Bche	ENSMUSG00000027792	Mao et al. 2016	Emx1-Cre;Eif4a3lox/+, RNA-seq	mouse E10.5 neocortices	EJC mutant-up
Gm11974	ENSMUSG00000085156	Mao et al. 2016	Emx1-Cre;Eif4a3lox/+, RNA-seq	mouse E10.5 neocortices	EJC mutant-up
Laptm4b	ENSMUSG00000022257	Mao et al. 2016	Emx1-Cre;Eif4a3lox/+, RNA-seq	mouse E10.5 neocortices	EJC mutant-up
Adamts3	ENSMUSG00000043635	Mao et al. 2016	Emx1-Cre;Eif4a3lox/+, RNA-seq	mouse E10.5 neocortices	EJC mutant-up
Mthfd1l	ENSMUSG00000040675	Mao et al. 2016	Emx1-Cre;Eif4a3lox/+, RNA-seq	mouse E10.5 neocortices	EJC mutant-up
Zmat3	ENSMUSG00000027663	Mao et al. 2016	Emx1-Cre;Eif4a3lox/+, RNA-seq	mouse E10.5 neocortices	EJC mutant-up
Cirbp	ENSMUSG00000045193	Mao et al. 2016	Emx1-Cre;Eif4a3lox/+, RNA-seq	mouse E10.5 neocortices	EJC mutant-up
Slc19a2	ENSMUSG00000040918	Mao et al. 2016	Emx1-Cre;Eif4a3lox/+, RNA-seq	mouse E10.5 neocortices	EJC mutant-up
Tbl3	ENSMUSG00000040688	Mao et al. 2016	Emx1-Cre;Eif4a3lox/+, RNA-seq	mouse E10.5 neocortices	EJC mutant-up
Aen	ENSMUSG00000030609	Mao et al. 2016	Emx1-Cre;Eif4a3lox/+, RNA-seq	mouse E10.5 neocortices	EJC mutant-up
Slc7a5	ENSMUSG00000040010	Mao et al. 2016	Emx1-Cre;Eif4a3lox/+, RNA-seq	mouse E10.5 neocortices	EJC mutant-up
Ciapin1	ENSMUSG00000031781	Mao et al. 2016	Emx1-Cre;Eif4a3lox/+, RNA-seq	mouse E10.5 neocortices	EJC mutant-up
Bcat1	ENSMUSG00000030268	Mao et al. 2016	Emx1-Cre;Eif4a3lox/+, RNA-seq	mouse E10.5 neocortices	EJC mutant-up
Gtse1	ENSMUSG00000022385	Mao et al. 2016	Emx1-Cre;Eif4a3lox/+, RNA-seq	mouse E10.5 neocortices	EJC mutant-up
Tk1	ENSMUSG00000025574	Mao et al. 2016	Emx1-Cre;Eif4a3lox/+, RNA-seq	mouse E10.5 neocortices	EJC mutant-up
Psrc1	ENSMUSG00000068744	Mao et al. 2016	Emx1-Cre;Eif4a3lox/+, RNA-seq	mouse E10.5 neocortices	EJC mutant-up
Gldc	ENSMUSG00000024827	Mao et al. 2016	Emx1-Cre;Eif4a3lox/+, RNA-seq	mouse E10.5 neocortices	EJC mutant-up
Trub2	ENSMUSG00000039826	Mao et al. 2016	Emx1-Cre;Eif4a3lox/+, RNA-seq	mouse E10.5 neocortices	EJC mutant-up
Shh	ENSMUSG00000002633	Mao et al. 2016	Emx1-Cre;Magohlox/+, RNA-seq	mouse E10.5 neocortices	EJC mutant-up
Otp	ENSMUSG00000021685	Mao et al. 2016	Emx1-Cre;Magohlox/+, RNA-seq	mouse E10.5 neocortices	EJC mutant-up
Gm9839	ENSMUSG00000049830	Mao et al. 2016	Emx1-Cre;Magohlox/+, RNA-seq	mouse E10.5 neocortices	EJC mutant-up
Gm14046	ENSMUSG00000084328	Mao et al. 2016	Emx1-Cre;Magohlox/+, RNA-seq	mouse E10.5 neocortices	EJC mutant-up
Gm5415	ENSMUSG00000091318	Mao et al. 2016	Emx1-Cre;Magohlox/+, RNA-seq	mouse E10.5 neocortices	EJC mutant-up
Gm15785	ENSMUSG00000082072	Mao et al. 2016	Emx1-Cre;Magohlox/+, RNA-seq	mouse E10.5 neocortices	EJC mutant-up
Gm13577	ENSMUSG00000082127	Mao et al. 2016	Emx1-Cre;Magohlox/+, RNA-seq	mouse E10.5 neocortices	EJC mutant-up
Mctp1	ENSMUSG00000021596	Mao et al. 2016	Emx1-Cre;Magohlox/+, RNA-seq	mouse E10.5 neocortices	EJC mutant-up
Gm24187	ENSMUSG00000088609	Mao et al. 2016	Emx1-Cre;Magohlox/+, RNA-seq	mouse E10.5 neocortices	EJC mutant-up
Gm24270	ENSMUSG00000076281	Mao et al. 2016	Emx1-Cre;Magohlox/+, RNA-seq	mouse E10.5 neocortices	EJC mutant-up
Lars2	ENSMUSG00000035202	Mao et al. 2016	Emx1-Cre;Magohlox/+, RNA-seq	mouse E10.5 neocortices	EJC mutant-up
Gm23935	ENSMUSG00000076258	Mao et al. 2016	Emx1-Cre;Magohlox/+, RNA-seq	mouse E10.5 neocortices	EJC mutant-up
Gm22641	ENSMUSG00000093098	Mao et al. 2016	Emx1-Cre;Magohlox/+, RNA-seq	mouse E10.5 neocortices	EJC mutant-up
Mir5105	ENSMUSG00000093077	Mao et al. 2016	Emx1-Cre;Magohlox/+, RNA-seq	mouse E10.5 neocortices	EJC mutant-up
Arhgef18	ENSMUSG00000004568	Mao et al. 2016	Emx1-Cre;Magohlox/+, RNA-seq	mouse E10.5 neocortices	EJC mutant-up
Dynlt1b	ENSMUSG00000096255	Mao et al. 2016	Emx1-Cre;Magohlox/+, RNA-seq	mouse E10.5 neocortices	EJC mutant-up
Gm9800	ENSMUSG00000045799	Mao et al. 2016	Emx1-Cre;Magohlox/+, RNA-seq	mouse E10.5 neocortices	EJC mutant-up
Efcab7	ENSMUSG00000073791	Mao et al. 2016	Emx1-Cre;Magohlox/+, RNA-seq	mouse E10.5 neocortices	EJC mutant-up
2410006H16Rik	ENSMUSG00000086841	Mao et al. 2016	Emx1-Cre;Magohlox/+, RNA-seq	mouse E10.5 neocortices	EJC mutant-up
Rps14	ENSMUSG00000024608	Mao et al. 2016	Emx1-Cre;Magohlox/+, RNA-seq	mouse E10.5 neocortices	EJC mutant-up
Dpysl4	ENSMUSG00000025478	Mao et al. 2016	Emx1-Cre;Magohlox/+, RNA-seq	mouse E10.5 neocortices	EJC mutant-up
Chchd2	ENSMUSG00000070493	Mao et al. 2016	Emx1-Cre;Magohlox/+, RNA-seq	mouse E10.5 neocortices	EJC mutant-up
Rpl34	ENSMUSG00000062006	Mao et al. 2016	Emx1-Cre;Magohlox/+, RNA-seq	mouse E10.5 neocortices	EJC mutant-up
Uqcr10	ENSMUSG00000059534	Mao et al. 2016	Emx1-Cre;Magohlox/+, RNA-seq	mouse E10.5 neocortices	EJC mutant-up
Atp5e	ENSMUSG00000016252	Mao et al. 2016	Emx1-Cre;Magohlox/+, RNA-seq	mouse E10.5 neocortices	EJC mutant-up
Psmb4	ENSMUSG00000005779	Mao et al. 2016	Emx1-Cre;Magohlox/+, RNA-seq	mouse E10.5 neocortices	EJC mutant-up
1110038B12Rik	ENSMUSG00000092203	Mooney et al. 2017	UPF1-bounds mRNAs (RIPseq)	mouse hippocampus	UPF1-bounds mRNAs
AI464131	ENSMUSG00000046312	Mooney et al. 2017	UPF1-bounds mRNAs (RIPseq)	mouse hippocampus	UPF1-bounds mRNAs
Aldh1a3	ENSMUSG00000015134	Mooney et al. 2017	UPF1-bounds mRNAs (RIPseq)	mouse hippocampus	UPF1-bounds mRNAs
Arc	ENSMUSG00000022602	Mooney et al. 2017	UPF1-bounds mRNAs (RIPseq)	mouse hippocampus	UPF1-bounds mRNAs
Celsr2	ENSMUSG00000068740	Mooney et al. 2017	UPF1-bounds mRNAs (RIPseq)	mouse hippocampus	UPF1-bounds mRNAs
Cntnap3	ENSMUSG00000033063	Mooney et al. 2017	UPF1-bounds mRNAs (RIPseq)	mouse hippocampus	UPF1-bounds mRNAs
Cxcl10	ENSMUSG00000034855	Mooney et al. 2017	UPF1-bounds mRNAs (RIPseq)	mouse hippocampus	UPF1-bounds mRNAs
D130043K22Rik	ENSMUSG00000006711	Mooney et al. 2017	UPF1-bounds mRNAs (RIPseq)	mouse hippocampus	UPF1-bounds mRNAs
Dnajb5	ENSMUSG00000036052	Mooney et al. 2017	UPF1-bounds mRNAs (RIPseq)	mouse hippocampus	UPF1-bounds mRNAs
Drd4	ENSMUSG00000025496	Mooney et al. 2017	UPF1-bounds mRNAs (RIPseq)	mouse hippocampus	UPF1-bounds mRNAs
Erich5	ENSMUSG00000044726	Mooney et al. 2017	UPF1-bounds mRNAs (RIPseq)	mouse hippocampus	UPF1-bounds mRNAs
Fat4	ENSMUSG00000046743	Mooney et al. 2017	UPF1-bounds mRNAs (RIPseq)	mouse hippocampus	UPF1-bounds mRNAs
Fosb	ENSMUSG00000003545	Mooney et al. 2017	UPF1-bounds mRNAs (RIPseq)	mouse hippocampus	UPF1-bounds mRNAs
Gadd45b	ENSMUSG00000015312	Mooney et al. 2017	UPF1-bounds mRNAs (RIPseq)	mouse hippocampus	UPF1-bounds mRNAs
Gadd45g	ENSMUSG00000021453	Mooney et al. 2017	UPF1-bounds mRNAs (RIPseq)	mouse hippocampus	UPF1-bounds mRNAs
Grasp	ENSMUSG00000000531	Mooney et al. 2017	UPF1-bounds mRNAs (RIPseq)	mouse hippocampus	UPF1-bounds mRNAs
Hspb1	ENSMUSG00000004951	Mooney et al. 2017	UPF1-bounds mRNAs (RIPseq)	mouse hippocampus	UPF1-bounds mRNAs
Ier5	ENSMUSG00000056708	Mooney et al. 2017	UPF1-bounds mRNAs (RIPseq)	mouse hippocampus	UPF1-bounds mRNAs
Igfbp5	ENSMUSG00000026185	Mooney et al. 2017	UPF1-bounds mRNAs (RIPseq)	mouse hippocampus	UPF1-bounds mRNAs
Inhba	ENSMUSG00000041324	Mooney et al. 2017	UPF1-bounds mRNAs (RIPseq)	mouse hippocampus	UPF1-bounds mRNAs
Klf10	ENSMUSG00000037465	Mooney et al. 2017	UPF1-bounds mRNAs (RIPseq)	mouse hippocampus	UPF1-bounds mRNAs
Klk7	ENSMUSG00000050063	Mooney et al. 2017	UPF1-bounds mRNAs (RIPseq)	mouse hippocampus	UPF1-bounds mRNAs
Krt75	ENSMUSG00000022986	Mooney et al. 2017	UPF1-bounds mRNAs (RIPseq)	mouse hippocampus	UPF1-bounds mRNAs
Lmbr1	ENSMUSG00000010721	Mooney et al. 2017	UPF1-bounds mRNAs (RIPseq)	mouse hippocampus	UPF1-bounds mRNAs
Lrp1b	ENSMUSG00000049252	Mooney et al. 2017	UPF1-bounds mRNAs (RIPseq)	mouse hippocampus	UPF1-bounds mRNAs
Magoh	ENSMUSG00000028609	Mooney et al. 2017	UPF1-bounds mRNAs (RIPseq)	mouse hippocampus	UPF1-bounds mRNAs
Nceh1	ENSMUSG00000027698	Mooney et al. 2017	UPF1-bounds mRNAs (RIPseq)	mouse hippocampus	UPF1-bounds mRNAs
Npas4	ENSMUSG00000045903	Mooney et al. 2017	UPF1-bounds mRNAs (RIPseq)	mouse hippocampus	UPF1-bounds mRNAs
Nptx2	ENSMUSG00000059991	Mooney et al. 2017	UPF1-bounds mRNAs (RIPseq)	mouse hippocampus	UPF1-bounds mRNAs
Npy	ENSMUSG00000029819	Mooney et al. 2017	UPF1-bounds mRNAs (RIPseq)	mouse hippocampus	UPF1-bounds mRNAs
Npy2r	ENSMUSG00000028004	Mooney et al. 2017	UPF1-bounds mRNAs (RIPseq)	mouse hippocampus	UPF1-bounds mRNAs
Pcdh20	ENSMUSG00000050505	Mooney et al. 2017	UPF1-bounds mRNAs (RIPseq)	mouse hippocampus	UPF1-bounds mRNAs
Pla2g2d	ENSMUSG00000041202	Mooney et al. 2017	UPF1-bounds mRNAs (RIPseq)	mouse hippocampus	UPF1-bounds mRNAs
Pofut1	ENSMUSG00000046020	Mooney et al. 2017	UPF1-bounds mRNAs (RIPseq)	mouse hippocampus	UPF1-bounds mRNAs
Pttg1	ENSMUSG00000020415	Mooney et al. 2017	UPF1-bounds mRNAs (RIPseq)	mouse hippocampus	UPF1-bounds mRNAs
Rasl11a	ENSMUSG00000029641	Mooney et al. 2017	UPF1-bounds mRNAs (RIPseq)	mouse hippocampus	UPF1-bounds mRNAs
Rgs2	ENSMUSG00000026360	Mooney et al. 2017	UPF1-bounds mRNAs (RIPseq)	mouse hippocampus	UPF1-bounds mRNAs
Rgs4	ENSMUSG00000038530	Mooney et al. 2017	UPF1-bounds mRNAs (RIPseq)	mouse hippocampus	UPF1-bounds mRNAs
Slc43a2	ENSMUSG00000038178	Mooney et al. 2017	UPF1-bounds mRNAs (RIPseq)	mouse hippocampus	UPF1-bounds mRNAs
Tmx4	ENSMUSG00000034723	Mooney et al. 2017	UPF1-bounds mRNAs (RIPseq)	mouse hippocampus	UPF1-bounds mRNAs
Trh	ENSMUSG00000005892	Mooney et al. 2017	UPF1-bounds mRNAs (RIPseq)	mouse hippocampus	UPF1-bounds mRNAs
Zzz3	ENSMUST00000106100	Bao et al. 2016	Stra8-Cre;Upf2fl/Δ testis, RNA-seq	mouse testis	Upf2-null up with PTCs
Zxdc	ENSMUST00000075117	Bao et al. 2016	Stra8-Cre;Upf2fl/Δ testis, RNA-seq	mouse testis	Upf2-null up with PTCs
Zfyve21	ENSMUST00000021714	Bao et al. 2016	Stra8-Cre;Upf2fl/Δ testis, RNA-seq	mouse testis	Upf2-null up with PTCs
Zfp952	ENSMUST00000157017	Bao et al. 2016	Stra8-Cre;Upf2fl/Δ testis, RNA-seq	mouse testis	Upf2-null up with PTCs
Zfp932	ENSMUST00000125213	Bao et al. 2016	Stra8-Cre;Upf2fl/Δ testis, RNA-seq	mouse testis	Upf2-null up with PTCs
Zfp882	ENSMUST00000125802	Bao et al. 2016	Stra8-Cre;Upf2fl/Δ testis, RNA-seq	mouse testis	Upf2-null up with PTCs
Zfp740	ENSMUST00000118729	Bao et al. 2016	Stra8-Cre;Upf2fl/Δ testis, RNA-seq	mouse testis	Upf2-null up with PTCs
Zfp711	ENSMUST00000122805	Bao et al. 2016	Stra8-Cre;Upf2fl/Δ testis, RNA-seq	mouse testis	Upf2-null up with PTCs
Zfp617	ENSMUST00000119003	Bao et al. 2016	Stra8-Cre;Upf2fl/Δ testis, RNA-seq	mouse testis	Upf2-null up with PTCs
Zfp606	ENSMUST00000151933	Bao et al. 2016	Stra8-Cre;Upf2fl/Δ testis, RNA-seq	mouse testis	Upf2-null up with PTCs
Zfp512	ENSMUST00000076264	Bao et al. 2016	Stra8-Cre;Upf2fl/Δ testis, RNA-seq	mouse testis	Upf2-null up with PTCs
Zfp386	ENSMUST00000073551	Bao et al. 2016	Stra8-Cre;Upf2fl/Δ testis, RNA-seq	mouse testis	Upf2-null up with PTCs
Zfp326	ENSMUST00000031227	Bao et al. 2016	Stra8-Cre;Upf2fl/Δ testis, RNA-seq	mouse testis	Upf2-null up with PTCs
Zfp280d	ENSMUST00000098576	Bao et al. 2016	Stra8-Cre;Upf2fl/Δ testis, RNA-seq	mouse testis	Upf2-null up with PTCs
Zfp275	ENSMUST00000159795	Bao et al. 2016	Stra8-Cre;Upf2fl/Δ testis, RNA-seq	mouse testis	Upf2-null up with PTCs
Zfp167	ENSMUST00000063980	Bao et al. 2016	Stra8-Cre;Upf2fl/Δ testis, RNA-seq	mouse testis	Upf2-null up with PTCs
Zfp143	ENSMUST00000061729	Bao et al. 2016	Stra8-Cre;Upf2fl/Δ testis, RNA-seq	mouse testis	Upf2-null up with PTCs
Zfml	ENSMUST00000089597	Bao et al. 2016	Stra8-Cre;Upf2fl/Δ testis, RNA-seq	mouse testis	Upf2-null up with PTCs
Zdhhc24	ENSMUST00000162134	Bao et al. 2016	Stra8-Cre;Upf2fl/Δ testis, RNA-seq	mouse testis	Upf2-null up with PTCs
Zdhhc13	ENSMUST00000118927	Bao et al. 2016	Stra8-Cre;Upf2fl/Δ testis, RNA-seq	mouse testis	Upf2-null up with PTCs
Zcwpw1	ENSMUST00000035852	Bao et al. 2016	Stra8-Cre;Upf2fl/Δ testis, RNA-seq	mouse testis	Upf2-null up with PTCs
Zcchc4	ENSMUST00000113904	Bao et al. 2016	Stra8-Cre;Upf2fl/Δ testis, RNA-seq	mouse testis	Upf2-null up with PTCs
Zcchc10	ENSMUST00000018383	Bao et al. 2016	Stra8-Cre;Upf2fl/Δ testis, RNA-seq	mouse testis	Upf2-null up with PTCs
Zc3h15	ENSMUST00000125422	Bao et al. 2016	Stra8-Cre;Upf2fl/Δ testis, RNA-seq	mouse testis	Upf2-null up with PTCs
Ywhah	ENSMUST00000138261	Bao et al. 2016	Stra8-Cre;Upf2fl/Δ testis, RNA-seq	mouse testis	Upf2-null up with PTCs
Ypel5	ENSMUST00000045174	Bao et al. 2016	Stra8-Cre;Upf2fl/Δ testis, RNA-seq	mouse testis	Upf2-null up with PTCs
Xpo1	ENSMUST00000020538	Bao et al. 2016	Stra8-Cre;Upf2fl/Δ testis, RNA-seq	mouse testis	Upf2-null up with PTCs
Xbp1	ENSMUST00000145588	Bao et al. 2016	Stra8-Cre;Upf2fl/Δ testis, RNA-seq	mouse testis	Upf2-null up with PTCs
Xaf1	ENSMUST00000146233	Bao et al. 2016	Stra8-Cre;Upf2fl/Δ testis, RNA-seq	mouse testis	Upf2-null up with PTCs
Wt1	ENSMUST00000139585	Bao et al. 2016	Stra8-Cre;Upf2fl/Δ testis, RNA-seq	mouse testis	Upf2-null up with PTCs
Wnk4	ENSMUST00000103108	Bao et al. 2016	Stra8-Cre;Upf2fl/Δ testis, RNA-seq	mouse testis	Upf2-null up with PTCs
Wisp2	ENSMUST00000138730	Bao et al. 2016	Stra8-Cre;Upf2fl/Δ testis, RNA-seq	mouse testis	Upf2-null up with PTCs
Wdyhv1	ENSMUST00000067563	Bao et al. 2016	Stra8-Cre;Upf2fl/Δ testis, RNA-seq	mouse testis	Upf2-null up with PTCs
Wdr92	ENSMUST00000151431	Bao et al. 2016	Stra8-Cre;Upf2fl/Δ testis, RNA-seq	mouse testis	Upf2-null up with PTCs
Wdr82	ENSMUST00000172286	Bao et al. 2016	Stra8-Cre;Upf2fl/Δ testis, RNA-seq	mouse testis	Upf2-null up with PTCs
Wdr75	ENSMUST00000027139	Bao et al. 2016	Stra8-Cre;Upf2fl/Δ testis, RNA-seq	mouse testis	Upf2-null up with PTCs
Wdr5	ENSMUST00000113952	Bao et al. 2016	Stra8-Cre;Upf2fl/Δ testis, RNA-seq	mouse testis	Upf2-null up with PTCs
Wdr45	ENSMUST00000154253	Bao et al. 2016	Stra8-Cre;Upf2fl/Δ testis, RNA-seq	mouse testis	Upf2-null up with PTCs
Vwa5a	ENSMUST00000001544	Bao et al. 2016	Stra8-Cre;Upf2fl/Δ testis, RNA-seq	mouse testis	Upf2-null up with PTCs
Vsig10	ENSMUST00000111967	Bao et al. 2016	Stra8-Cre;Upf2fl/Δ testis, RNA-seq	mouse testis	Upf2-null up with PTCs
Vrk1	ENSMUST00000021539	Bao et al. 2016	Stra8-Cre;Upf2fl/Δ testis, RNA-seq	mouse testis	Upf2-null up with PTCs
Vps33b	ENSMUST00000164810	Bao et al. 2016	Stra8-Cre;Upf2fl/Δ testis, RNA-seq	mouse testis	Upf2-null up with PTCs
Vps25	ENSMUST00000144306	Bao et al. 2016	Stra8-Cre;Upf2fl/Δ testis, RNA-seq	mouse testis	Upf2-null up with PTCs
Vps18	ENSMUST00000151500	Bao et al. 2016	Stra8-Cre;Upf2fl/Δ testis, RNA-seq	mouse testis	Upf2-null up with PTCs
Vps16	ENSMUST00000131220	Bao et al. 2016	Stra8-Cre;Upf2fl/Δ testis, RNA-seq	mouse testis	Upf2-null up with PTCs
Vps13c	ENSMUST00000077879	Bao et al. 2016	Stra8-Cre;Upf2fl/Δ testis, RNA-seq	mouse testis	Upf2-null up with PTCs
Vma21	ENSMUST00000114577	Bao et al. 2016	Stra8-Cre;Upf2fl/Δ testis, RNA-seq	mouse testis	Upf2-null up with PTCs
Vdac1	ENSMUST00000125694	Bao et al. 2016	Stra8-Cre;Upf2fl/Δ testis, RNA-seq	mouse testis	Upf2-null up with PTCs
Vamp4	ENSMUST00000132158	Bao et al. 2016	Stra8-Cre;Upf2fl/Δ testis, RNA-seq	mouse testis	Upf2-null up with PTCs
Usp33	ENSMUST00000026507	Bao et al. 2016	Stra8-Cre;Upf2fl/Δ testis, RNA-seq	mouse testis	Upf2-null up with PTCs
Usp11	ENSMUST00000033383	Bao et al. 2016	Stra8-Cre;Upf2fl/Δ testis, RNA-seq	mouse testis	Upf2-null up with PTCs
Uso1	ENSMUST00000031355	Bao et al. 2016	Stra8-Cre;Upf2fl/Δ testis, RNA-seq	mouse testis	Upf2-null up with PTCs
Usf1	ENSMUST00000001284	Bao et al. 2016	Stra8-Cre;Upf2fl/Δ testis, RNA-seq	mouse testis	Upf2-null up with PTCs
Upf2	ENSMUST00000060092	Bao et al. 2016	Stra8-Cre;Upf2fl/Δ testis, RNA-seq	mouse testis	Upf2-null up with PTCs
Ung	ENSMUST00000143455	Bao et al. 2016	Stra8-Cre;Upf2fl/Δ testis, RNA-seq	mouse testis	Upf2-null up with PTCs
Unc13b	ENSMUST00000107952	Bao et al. 2016	Stra8-Cre;Upf2fl/Δ testis, RNA-seq	mouse testis	Upf2-null up with PTCs
Unc119	ENSMUST00000149161	Bao et al. 2016	Stra8-Cre;Upf2fl/Δ testis, RNA-seq	mouse testis	Upf2-null up with PTCs
Ulk3	ENSMUST00000053230	Bao et al. 2016	Stra8-Cre;Upf2fl/Δ testis, RNA-seq	mouse testis	Upf2-null up with PTCs
Ubxn2b	ENSMUST00000029907	Bao et al. 2016	Stra8-Cre;Upf2fl/Δ testis, RNA-seq	mouse testis	Upf2-null up with PTCs
Ubr3	ENSMUST00000112251	Bao et al. 2016	Stra8-Cre;Upf2fl/Δ testis, RNA-seq	mouse testis	Upf2-null up with PTCs
Ube2l6	ENSMUST00000102642	Bao et al. 2016	Stra8-Cre;Upf2fl/Δ testis, RNA-seq	mouse testis	Upf2-null up with PTCs
Ube1y1	ENSMUST00000115894	Bao et al. 2016	Stra8-Cre;Upf2fl/Δ testis, RNA-seq	mouse testis	Upf2-null up with PTCs
Tyro3	ENSMUST00000147636	Bao et al. 2016	Stra8-Cre;Upf2fl/Δ testis, RNA-seq	mouse testis	Upf2-null up with PTCs
Tubgcp5	ENSMUST00000032627	Bao et al. 2016	Stra8-Cre;Upf2fl/Δ testis, RNA-seq	mouse testis	Upf2-null up with PTCs
Ttpal	ENSMUST00000109405	Bao et al. 2016	Stra8-Cre;Upf2fl/Δ testis, RNA-seq	mouse testis	Upf2-null up with PTCs
Ttc3	ENSMUST00000117648	Bao et al. 2016	Stra8-Cre;Upf2fl/Δ testis, RNA-seq	mouse testis	Upf2-null up with PTCs
Tspan17	ENSMUST00000171859	Bao et al. 2016	Stra8-Cre;Upf2fl/Δ testis, RNA-seq	mouse testis	Upf2-null up with PTCs
Tsen2	ENSMUST00000040234	Bao et al. 2016	Stra8-Cre;Upf2fl/Δ testis, RNA-seq	mouse testis	Upf2-null up with PTCs
Tsc22d1	ENSMUST00000110888	Bao et al. 2016	Stra8-Cre;Upf2fl/Δ testis, RNA-seq	mouse testis	Upf2-null up with PTCs
Trrap	ENSMUST00000136379	Bao et al. 2016	Stra8-Cre;Upf2fl/Δ testis, RNA-seq	mouse testis	Upf2-null up with PTCs
Trp53	ENSMUST00000171247	Bao et al. 2016	Stra8-Cre;Upf2fl/Δ testis, RNA-seq	mouse testis	Upf2-null up with PTCs
Trmu	ENSMUST00000162491	Bao et al. 2016	Stra8-Cre;Upf2fl/Δ testis, RNA-seq	mouse testis	Upf2-null up with PTCs
Trit1	ENSMUST00000102649	Bao et al. 2016	Stra8-Cre;Upf2fl/Δ testis, RNA-seq	mouse testis	Upf2-null up with PTCs
Trim7	ENSMUST00000109215	Bao et al. 2016	Stra8-Cre;Upf2fl/Δ testis, RNA-seq	mouse testis	Upf2-null up with PTCs
Trim35	ENSMUST00000121006	Bao et al. 2016	Stra8-Cre;Upf2fl/Δ testis, RNA-seq	mouse testis	Upf2-null up with PTCs
Trim26	ENSMUST00000130367	Bao et al. 2016	Stra8-Cre;Upf2fl/Δ testis, RNA-seq	mouse testis	Upf2-null up with PTCs
Trim25	ENSMUST00000107896	Bao et al. 2016	Stra8-Cre;Upf2fl/Δ testis, RNA-seq	mouse testis	Upf2-null up with PTCs
Tprkb	ENSMUST00000113753	Bao et al. 2016	Stra8-Cre;Upf2fl/Δ testis, RNA-seq	mouse testis	Upf2-null up with PTCs
Tpra1	ENSMUST00000055022	Bao et al. 2016	Stra8-Cre;Upf2fl/Δ testis, RNA-seq	mouse testis	Upf2-null up with PTCs
Topbp1	ENSMUST00000035164	Bao et al. 2016	Stra8-Cre;Upf2fl/Δ testis, RNA-seq	mouse testis	Upf2-null up with PTCs
Top2b	ENSMUST00000017629	Bao et al. 2016	Stra8-Cre;Upf2fl/Δ testis, RNA-seq	mouse testis	Upf2-null up with PTCs
Tnrc6a	ENSMUST00000094053	Bao et al. 2016	Stra8-Cre;Upf2fl/Δ testis, RNA-seq	mouse testis	Upf2-null up with PTCs
Tnks2	ENSMUST00000168718	Bao et al. 2016	Stra8-Cre;Upf2fl/Δ testis, RNA-seq	mouse testis	Upf2-null up with PTCs
Tnik	ENSMUST00000160934	Bao et al. 2016	Stra8-Cre;Upf2fl/Δ testis, RNA-seq	mouse testis	Upf2-null up with PTCs
Tmx3	ENSMUST00000025515	Bao et al. 2016	Stra8-Cre;Upf2fl/Δ testis, RNA-seq	mouse testis	Upf2-null up with PTCs
Tmem87b	ENSMUST00000110325	Bao et al. 2016	Stra8-Cre;Upf2fl/Δ testis, RNA-seq	mouse testis	Upf2-null up with PTCs
Tmem59	ENSMUST00000154007	Bao et al. 2016	Stra8-Cre;Upf2fl/Δ testis, RNA-seq	mouse testis	Upf2-null up with PTCs
Tmem39a	ENSMUST00000002924	Bao et al. 2016	Stra8-Cre;Upf2fl/Δ testis, RNA-seq	mouse testis	Upf2-null up with PTCs
Tmem188	ENSMUST00000127490	Bao et al. 2016	Stra8-Cre;Upf2fl/Δ testis, RNA-seq	mouse testis	Upf2-null up with PTCs
Tmem164	ENSMUST00000112889	Bao et al. 2016	Stra8-Cre;Upf2fl/Δ testis, RNA-seq	mouse testis	Upf2-null up with PTCs
Tmem14c	ENSMUST00000021790	Bao et al. 2016	Stra8-Cre;Upf2fl/Δ testis, RNA-seq	mouse testis	Upf2-null up with PTCs
Tmem110	ENSMUST00000164482	Bao et al. 2016	Stra8-Cre;Upf2fl/Δ testis, RNA-seq	mouse testis	Upf2-null up with PTCs
Tmed2	ENSMUST00000124529	Bao et al. 2016	Stra8-Cre;Upf2fl/Δ testis, RNA-seq	mouse testis	Upf2-null up with PTCs
Tle2	ENSMUST00000146358	Bao et al. 2016	Stra8-Cre;Upf2fl/Δ testis, RNA-seq	mouse testis	Upf2-null up with PTCs
Tktl1	ENSMUST00000010127	Bao et al. 2016	Stra8-Cre;Upf2fl/Δ testis, RNA-seq	mouse testis	Upf2-null up with PTCs
Tia1	ENSMUST00000095754	Bao et al. 2016	Stra8-Cre;Upf2fl/Δ testis, RNA-seq	mouse testis	Upf2-null up with PTCs
Th1l	ENSMUST00000016397	Bao et al. 2016	Stra8-Cre;Upf2fl/Δ testis, RNA-seq	mouse testis	Upf2-null up with PTCs
Tgs1	ENSMUST00000052712	Bao et al. 2016	Stra8-Cre;Upf2fl/Δ testis, RNA-seq	mouse testis	Upf2-null up with PTCs
Tecpr2	ENSMUST00000021703	Bao et al. 2016	Stra8-Cre;Upf2fl/Δ testis, RNA-seq	mouse testis	Upf2-null up with PTCs
Tead1	ENSMUST00000167060	Bao et al. 2016	Stra8-Cre;Upf2fl/Δ testis, RNA-seq	mouse testis	Upf2-null up with PTCs
Tdp2	ENSMUST00000038039	Bao et al. 2016	Stra8-Cre;Upf2fl/Δ testis, RNA-seq	mouse testis	Upf2-null up with PTCs
Tcerg1	ENSMUST00000173642	Bao et al. 2016	Stra8-Cre;Upf2fl/Δ testis, RNA-seq	mouse testis	Upf2-null up with PTCs
Tbx22	ENSMUST00000172682	Bao et al. 2016	Stra8-Cre;Upf2fl/Δ testis, RNA-seq	mouse testis	Upf2-null up with PTCs
Tbl1x	ENSMUST00000088217	Bao et al. 2016	Stra8-Cre;Upf2fl/Δ testis, RNA-seq	mouse testis	Upf2-null up with PTCs
Tbc1d9b	ENSMUST00000147628	Bao et al. 2016	Stra8-Cre;Upf2fl/Δ testis, RNA-seq	mouse testis	Upf2-null up with PTCs
Tbc1d13	ENSMUST00000136183	Bao et al. 2016	Stra8-Cre;Upf2fl/Δ testis, RNA-seq	mouse testis	Upf2-null up with PTCs
Taz	ENSMUST00000069722	Bao et al. 2016	Stra8-Cre;Upf2fl/Δ testis, RNA-seq	mouse testis	Upf2-null up with PTCs
Tatdn2	ENSMUST00000089018	Bao et al. 2016	Stra8-Cre;Upf2fl/Δ testis, RNA-seq	mouse testis	Upf2-null up with PTCs
Tap2	ENSMUST00000127543	Bao et al. 2016	Stra8-Cre;Upf2fl/Δ testis, RNA-seq	mouse testis	Upf2-null up with PTCs
Tank	ENSMUST00000141544	Bao et al. 2016	Stra8-Cre;Upf2fl/Δ testis, RNA-seq	mouse testis	Upf2-null up with PTCs
Taf1d	ENSMUST00000171167	Bao et al. 2016	Stra8-Cre;Upf2fl/Δ testis, RNA-seq	mouse testis	Upf2-null up with PTCs
Taf15	ENSMUST00000092837	Bao et al. 2016	Stra8-Cre;Upf2fl/Δ testis, RNA-seq	mouse testis	Upf2-null up with PTCs
Taf1	ENSMUST00000143908	Bao et al. 2016	Stra8-Cre;Upf2fl/Δ testis, RNA-seq	mouse testis	Upf2-null up with PTCs
Syt9	ENSMUST00000073459	Bao et al. 2016	Stra8-Cre;Upf2fl/Δ testis, RNA-seq	mouse testis	Upf2-null up with PTCs
Syngr2	ENSMUST00000177241	Bao et al. 2016	Stra8-Cre;Upf2fl/Δ testis, RNA-seq	mouse testis	Upf2-null up with PTCs
Sycp3	ENSMUST00000020252	Bao et al. 2016	Stra8-Cre;Upf2fl/Δ testis, RNA-seq	mouse testis	Upf2-null up with PTCs
Suz12	ENSMUST00000148140	Bao et al. 2016	Stra8-Cre;Upf2fl/Δ testis, RNA-seq	mouse testis	Upf2-null up with PTCs
Stx4a	ENSMUST00000033075	Bao et al. 2016	Stra8-Cre;Upf2fl/Δ testis, RNA-seq	mouse testis	Upf2-null up with PTCs
Stx1a	ENSMUST00000150838	Bao et al. 2016	Stra8-Cre;Upf2fl/Δ testis, RNA-seq	mouse testis	Upf2-null up with PTCs
Stk4	ENSMUST00000018353	Bao et al. 2016	Stra8-Cre;Upf2fl/Δ testis, RNA-seq	mouse testis	Upf2-null up with PTCs
Stk38l	ENSMUST00000001675	Bao et al. 2016	Stra8-Cre;Upf2fl/Δ testis, RNA-seq	mouse testis	Upf2-null up with PTCs
Stim2	ENSMUST00000152812	Bao et al. 2016	Stra8-Cre;Upf2fl/Δ testis, RNA-seq	mouse testis	Upf2-null up with PTCs
Stard7	ENSMUST00000069099	Bao et al. 2016	Stra8-Cre;Upf2fl/Δ testis, RNA-seq	mouse testis	Upf2-null up with PTCs
Stag1	ENSMUST00000155108	Bao et al. 2016	Stra8-Cre;Upf2fl/Δ testis, RNA-seq	mouse testis	Upf2-null up with PTCs
St6galnac6	ENSMUST00000095044	Bao et al. 2016	Stra8-Cre;Upf2fl/Δ testis, RNA-seq	mouse testis	Upf2-null up with PTCs
St3gal5	ENSMUST00000114112	Bao et al. 2016	Stra8-Cre;Upf2fl/Δ testis, RNA-seq	mouse testis	Upf2-null up with PTCs
Ssr4	ENSMUST00000166518	Bao et al. 2016	Stra8-Cre;Upf2fl/Δ testis, RNA-seq	mouse testis	Upf2-null up with PTCs
Ssfa2	ENSMUST00000028393	Bao et al. 2016	Stra8-Cre;Upf2fl/Δ testis, RNA-seq	mouse testis	Upf2-null up with PTCs
Ssb	ENSMUST00000132186	Bao et al. 2016	Stra8-Cre;Upf2fl/Δ testis, RNA-seq	mouse testis	Upf2-null up with PTCs
Srsf6	ENSMUST00000017065	Bao et al. 2016	Stra8-Cre;Upf2fl/Δ testis, RNA-seq	mouse testis	Upf2-null up with PTCs
Srsf5	ENSMUST00000133783	Bao et al. 2016	Stra8-Cre;Upf2fl/Δ testis, RNA-seq	mouse testis	Upf2-null up with PTCs
Srsf3	ENSMUST00000147265	Bao et al. 2016	Stra8-Cre;Upf2fl/Δ testis, RNA-seq	mouse testis	Upf2-null up with PTCs
Srsf10	ENSMUST00000030438	Bao et al. 2016	Stra8-Cre;Upf2fl/Δ testis, RNA-seq	mouse testis	Upf2-null up with PTCs
Spop	ENSMUST00000107724	Bao et al. 2016	Stra8-Cre;Upf2fl/Δ testis, RNA-seq	mouse testis	Upf2-null up with PTCs
Sphk1	ENSMUST00000134834	Bao et al. 2016	Stra8-Cre;Upf2fl/Δ testis, RNA-seq	mouse testis	Upf2-null up with PTCs
Sorbs2	ENSMUST00000132767	Bao et al. 2016	Stra8-Cre;Upf2fl/Δ testis, RNA-seq	mouse testis	Upf2-null up with PTCs
Sohlh2	ENSMUST00000029369	Bao et al. 2016	Stra8-Cre;Upf2fl/Δ testis, RNA-seq	mouse testis	Upf2-null up with PTCs
Snx2	ENSMUST00000037850	Bao et al. 2016	Stra8-Cre;Upf2fl/Δ testis, RNA-seq	mouse testis	Upf2-null up with PTCs
Snx10	ENSMUST00000049152	Bao et al. 2016	Stra8-Cre;Upf2fl/Δ testis, RNA-seq	mouse testis	Upf2-null up with PTCs
Snrnp48	ENSMUST00000091641	Bao et al. 2016	Stra8-Cre;Upf2fl/Δ testis, RNA-seq	mouse testis	Upf2-null up with PTCs
Snhg11	ENSMUST00000149303	Bao et al. 2016	Stra8-Cre;Upf2fl/Δ testis, RNA-seq	mouse testis	Upf2-null up with PTCs
Smyd5	ENSMUST00000045693	Bao et al. 2016	Stra8-Cre;Upf2fl/Δ testis, RNA-seq	mouse testis	Upf2-null up with PTCs
Smpx	ENSMUST00000147283	Bao et al. 2016	Stra8-Cre;Upf2fl/Δ testis, RNA-seq	mouse testis	Upf2-null up with PTCs
Smox	ENSMUST00000137489	Bao et al. 2016	Stra8-Cre;Upf2fl/Δ testis, RNA-seq	mouse testis	Upf2-null up with PTCs
Smc1a	ENSMUST00000145518	Bao et al. 2016	Stra8-Cre;Upf2fl/Δ testis, RNA-seq	mouse testis	Upf2-null up with PTCs
Smarcad1	ENSMUST00000031984	Bao et al. 2016	Stra8-Cre;Upf2fl/Δ testis, RNA-seq	mouse testis	Upf2-null up with PTCs
Slc6a8	ENSMUST00000114467	Bao et al. 2016	Stra8-Cre;Upf2fl/Δ testis, RNA-seq	mouse testis	Upf2-null up with PTCs
Slc4a3	ENSMUST00000113545	Bao et al. 2016	Stra8-Cre;Upf2fl/Δ testis, RNA-seq	mouse testis	Upf2-null up with PTCs
Slc48a1	ENSMUST00000117892	Bao et al. 2016	Stra8-Cre;Upf2fl/Δ testis, RNA-seq	mouse testis	Upf2-null up with PTCs
Slc44a1	ENSMUST00000107651	Bao et al. 2016	Stra8-Cre;Upf2fl/Δ testis, RNA-seq	mouse testis	Upf2-null up with PTCs
Slc30a2	ENSMUST00000105874	Bao et al. 2016	Stra8-Cre;Upf2fl/Δ testis, RNA-seq	mouse testis	Upf2-null up with PTCs
Slc2a1	ENSMUST00000030398	Bao et al. 2016	Stra8-Cre;Upf2fl/Δ testis, RNA-seq	mouse testis	Upf2-null up with PTCs
Slc25a5	ENSMUST00000016463	Bao et al. 2016	Stra8-Cre;Upf2fl/Δ testis, RNA-seq	mouse testis	Upf2-null up with PTCs
Slc25a14	ENSMUST00000134757	Bao et al. 2016	Stra8-Cre;Upf2fl/Δ testis, RNA-seq	mouse testis	Upf2-null up with PTCs
Slc20a2	ENSMUST00000067786	Bao et al. 2016	Stra8-Cre;Upf2fl/Δ testis, RNA-seq	mouse testis	Upf2-null up with PTCs
Slc19a2	ENSMUST00000044021	Bao et al. 2016	Stra8-Cre;Upf2fl/Δ testis, RNA-seq	mouse testis	Upf2-null up with PTCs
Slc12a6	ENSMUST00000141047	Bao et al. 2016	Stra8-Cre;Upf2fl/Δ testis, RNA-seq	mouse testis	Upf2-null up with PTCs
Slain1	ENSMUST00000159456	Bao et al. 2016	Stra8-Cre;Upf2fl/Δ testis, RNA-seq	mouse testis	Upf2-null up with PTCs
Shprh	ENSMUST00000159810	Bao et al. 2016	Stra8-Cre;Upf2fl/Δ testis, RNA-seq	mouse testis	Upf2-null up with PTCs
Shisa5	ENSMUST00000112059	Bao et al. 2016	Stra8-Cre;Upf2fl/Δ testis, RNA-seq	mouse testis	Upf2-null up with PTCs
Sh3gl2	ENSMUST00000107188	Bao et al. 2016	Stra8-Cre;Upf2fl/Δ testis, RNA-seq	mouse testis	Upf2-null up with PTCs
Sh3bgrl	ENSMUST00000133614	Bao et al. 2016	Stra8-Cre;Upf2fl/Δ testis, RNA-seq	mouse testis	Upf2-null up with PTCs
Sh3bgr	ENSMUST00000132424	Bao et al. 2016	Stra8-Cre;Upf2fl/Δ testis, RNA-seq	mouse testis	Upf2-null up with PTCs
Sfswap	ENSMUST00000053737	Bao et al. 2016	Stra8-Cre;Upf2fl/Δ testis, RNA-seq	mouse testis	Upf2-null up with PTCs
Sfrs18	ENSMUST00000029911	Bao et al. 2016	Stra8-Cre;Upf2fl/Δ testis, RNA-seq	mouse testis	Upf2-null up with PTCs
Sfr1	ENSMUST00000099352	Bao et al. 2016	Stra8-Cre;Upf2fl/Δ testis, RNA-seq	mouse testis	Upf2-null up with PTCs
Setd8	ENSMUST00000100709	Bao et al. 2016	Stra8-Cre;Upf2fl/Δ testis, RNA-seq	mouse testis	Upf2-null up with PTCs
Setd2	ENSMUST00000173373	Bao et al. 2016	Stra8-Cre;Upf2fl/Δ testis, RNA-seq	mouse testis	Upf2-null up with PTCs
Sepx1	ENSMUST00000115262	Bao et al. 2016	Stra8-Cre;Upf2fl/Δ testis, RNA-seq	mouse testis	Upf2-null up with PTCs
Sepp1	ENSMUST00000082424	Bao et al. 2016	Stra8-Cre;Upf2fl/Δ testis, RNA-seq	mouse testis	Upf2-null up with PTCs
Sephs1	ENSMUST00000027973	Bao et al. 2016	Stra8-Cre;Upf2fl/Δ testis, RNA-seq	mouse testis	Upf2-null up with PTCs
Sema6c	ENSMUST00000090823	Bao et al. 2016	Stra8-Cre;Upf2fl/Δ testis, RNA-seq	mouse testis	Upf2-null up with PTCs
Sema3c	ENSMUST00000170181	Bao et al. 2016	Stra8-Cre;Upf2fl/Δ testis, RNA-seq	mouse testis	Upf2-null up with PTCs
Selenbp1	ENSMUST00000140757	Bao et al. 2016	Stra8-Cre;Upf2fl/Δ testis, RNA-seq	mouse testis	Upf2-null up with PTCs
Sec62	ENSMUST00000029256	Bao et al. 2016	Stra8-Cre;Upf2fl/Δ testis, RNA-seq	mouse testis	Upf2-null up with PTCs
Scrn2	ENSMUST00000126874	Bao et al. 2016	Stra8-Cre;Upf2fl/Δ testis, RNA-seq	mouse testis	Upf2-null up with PTCs
Sco1	ENSMUST00000092996	Bao et al. 2016	Stra8-Cre;Upf2fl/Δ testis, RNA-seq	mouse testis	Upf2-null up with PTCs
Scml2	ENSMUST00000112345	Bao et al. 2016	Stra8-Cre;Upf2fl/Δ testis, RNA-seq	mouse testis	Upf2-null up with PTCs
Scaf8	ENSMUST00000082356	Bao et al. 2016	Stra8-Cre;Upf2fl/Δ testis, RNA-seq	mouse testis	Upf2-null up with PTCs
Sacm1l	ENSMUST00000026270	Bao et al. 2016	Stra8-Cre;Upf2fl/Δ testis, RNA-seq	mouse testis	Upf2-null up with PTCs
Rttn	ENSMUST00000023828	Bao et al. 2016	Stra8-Cre;Upf2fl/Δ testis, RNA-seq	mouse testis	Upf2-null up with PTCs
Rrp1b	ENSMUST00000081339	Bao et al. 2016	Stra8-Cre;Upf2fl/Δ testis, RNA-seq	mouse testis	Upf2-null up with PTCs
Rps6ka3	ENSMUST00000156648	Bao et al. 2016	Stra8-Cre;Upf2fl/Δ testis, RNA-seq	mouse testis	Upf2-null up with PTCs
Rps6ka2	ENSMUST00000024619	Bao et al. 2016	Stra8-Cre;Upf2fl/Δ testis, RNA-seq	mouse testis	Upf2-null up with PTCs
Rpl36a	ENSMUST00000170828	Bao et al. 2016	Stra8-Cre;Upf2fl/Δ testis, RNA-seq	mouse testis	Upf2-null up with PTCs
Rpl10	ENSMUST00000142142	Bao et al. 2016	Stra8-Cre;Upf2fl/Δ testis, RNA-seq	mouse testis	Upf2-null up with PTCs
RP23-190G10.4.1	ENSMUST00000160764	Bao et al. 2016	Stra8-Cre;Upf2fl/Δ testis, RNA-seq	mouse testis	Upf2-null up with PTCs
Rorc	ENSMUST00000126783	Bao et al. 2016	Stra8-Cre;Upf2fl/Δ testis, RNA-seq	mouse testis	Upf2-null up with PTCs
Rngtt	ENSMUST00000108153	Bao et al. 2016	Stra8-Cre;Upf2fl/Δ testis, RNA-seq	mouse testis	Upf2-null up with PTCs
Rnf213	ENSMUST00000082107	Bao et al. 2016	Stra8-Cre;Upf2fl/Δ testis, RNA-seq	mouse testis	Upf2-null up with PTCs
Rnf145	ENSMUST00000019333	Bao et al. 2016	Stra8-Cre;Upf2fl/Δ testis, RNA-seq	mouse testis	Upf2-null up with PTCs
Rnf130	ENSMUST00000102776	Bao et al. 2016	Stra8-Cre;Upf2fl/Δ testis, RNA-seq	mouse testis	Upf2-null up with PTCs
Ric8b	ENSMUST00000038523	Bao et al. 2016	Stra8-Cre;Upf2fl/Δ testis, RNA-seq	mouse testis	Upf2-null up with PTCs
Rhpn2	ENSMUST00000085556	Bao et al. 2016	Stra8-Cre;Upf2fl/Δ testis, RNA-seq	mouse testis	Upf2-null up with PTCs
Rft1	ENSMUST00000064230	Bao et al. 2016	Stra8-Cre;Upf2fl/Δ testis, RNA-seq	mouse testis	Upf2-null up with PTCs
Reck	ENSMUST00000128463	Bao et al. 2016	Stra8-Cre;Upf2fl/Δ testis, RNA-seq	mouse testis	Upf2-null up with PTCs
Rcbtb1	ENSMUST00000111255	Bao et al. 2016	Stra8-Cre;Upf2fl/Δ testis, RNA-seq	mouse testis	Upf2-null up with PTCs
Rbm45	ENSMUST00000046389	Bao et al. 2016	Stra8-Cre;Upf2fl/Δ testis, RNA-seq	mouse testis	Upf2-null up with PTCs
Rbbp7	ENSMUST00000138791	Bao et al. 2016	Stra8-Cre;Upf2fl/Δ testis, RNA-seq	mouse testis	Upf2-null up with PTCs
Rars2	ENSMUST00000029968	Bao et al. 2016	Stra8-Cre;Upf2fl/Δ testis, RNA-seq	mouse testis	Upf2-null up with PTCs
Ramp2	ENSMUST00000128260	Bao et al. 2016	Stra8-Cre;Upf2fl/Δ testis, RNA-seq	mouse testis	Upf2-null up with PTCs
Ralgapb	ENSMUST00000109485	Bao et al. 2016	Stra8-Cre;Upf2fl/Δ testis, RNA-seq	mouse testis	Upf2-null up with PTCs
Rad54b	ENSMUST00000070755	Bao et al. 2016	Stra8-Cre;Upf2fl/Δ testis, RNA-seq	mouse testis	Upf2-null up with PTCs
Rab34	ENSMUST00000002128	Bao et al. 2016	Stra8-Cre;Upf2fl/Δ testis, RNA-seq	mouse testis	Upf2-null up with PTCs
Rab18	ENSMUST00000097680	Bao et al. 2016	Stra8-Cre;Upf2fl/Δ testis, RNA-seq	mouse testis	Upf2-null up with PTCs
Pwwp2a	ENSMUST00000094294	Bao et al. 2016	Stra8-Cre;Upf2fl/Δ testis, RNA-seq	mouse testis	Upf2-null up with PTCs
Ptprg	ENSMUST00000142917	Bao et al. 2016	Stra8-Cre;Upf2fl/Δ testis, RNA-seq	mouse testis	Upf2-null up with PTCs
Ptpre	ENSMUST00000073961	Bao et al. 2016	Stra8-Cre;Upf2fl/Δ testis, RNA-seq	mouse testis	Upf2-null up with PTCs
Ptpn13	ENSMUST00000048957	Bao et al. 2016	Stra8-Cre;Upf2fl/Δ testis, RNA-seq	mouse testis	Upf2-null up with PTCs
Psme1	ENSMUST00000172941	Bao et al. 2016	Stra8-Cre;Upf2fl/Δ testis, RNA-seq	mouse testis	Upf2-null up with PTCs
Psmd14	ENSMUST00000028278	Bao et al. 2016	Stra8-Cre;Upf2fl/Δ testis, RNA-seq	mouse testis	Upf2-null up with PTCs
Prpf4b	ENSMUST00000077853	Bao et al. 2016	Stra8-Cre;Upf2fl/Δ testis, RNA-seq	mouse testis	Upf2-null up with PTCs
Prpf39	ENSMUST00000129956	Bao et al. 2016	Stra8-Cre;Upf2fl/Δ testis, RNA-seq	mouse testis	Upf2-null up with PTCs
Prlr	ENSMUST00000145428	Bao et al. 2016	Stra8-Cre;Upf2fl/Δ testis, RNA-seq	mouse testis	Upf2-null up with PTCs
Prkdc	ENSMUST00000023352	Bao et al. 2016	Stra8-Cre;Upf2fl/Δ testis, RNA-seq	mouse testis	Upf2-null up with PTCs
Ppp2r1a	ENSMUST00000173658	Bao et al. 2016	Stra8-Cre;Upf2fl/Δ testis, RNA-seq	mouse testis	Upf2-null up with PTCs
Ppp1r12a	ENSMUST00000167874	Bao et al. 2016	Stra8-Cre;Upf2fl/Δ testis, RNA-seq	mouse testis	Upf2-null up with PTCs
Ppp1cb	ENSMUST00000131300	Bao et al. 2016	Stra8-Cre;Upf2fl/Δ testis, RNA-seq	mouse testis	Upf2-null up with PTCs
Ppil4	ENSMUST00000015901	Bao et al. 2016	Stra8-Cre;Upf2fl/Δ testis, RNA-seq	mouse testis	Upf2-null up with PTCs
Pop1	ENSMUST00000052290	Bao et al. 2016	Stra8-Cre;Upf2fl/Δ testis, RNA-seq	mouse testis	Upf2-null up with PTCs
Polr3f	ENSMUST00000028914	Bao et al. 2016	Stra8-Cre;Upf2fl/Δ testis, RNA-seq	mouse testis	Upf2-null up with PTCs
Polr3b	ENSMUST00000077175	Bao et al. 2016	Stra8-Cre;Upf2fl/Δ testis, RNA-seq	mouse testis	Upf2-null up with PTCs
Polr1b	ENSMUST00000103205	Bao et al. 2016	Stra8-Cre;Upf2fl/Δ testis, RNA-seq	mouse testis	Upf2-null up with PTCs
Polq	ENSMUST00000114798	Bao et al. 2016	Stra8-Cre;Upf2fl/Δ testis, RNA-seq	mouse testis	Upf2-null up with PTCs
Pnpt1	ENSMUST00000020756	Bao et al. 2016	Stra8-Cre;Upf2fl/Δ testis, RNA-seq	mouse testis	Upf2-null up with PTCs
Pnpla6	ENSMUST00000111070	Bao et al. 2016	Stra8-Cre;Upf2fl/Δ testis, RNA-seq	mouse testis	Upf2-null up with PTCs
Plxdc2	ENSMUST00000028081	Bao et al. 2016	Stra8-Cre;Upf2fl/Δ testis, RNA-seq	mouse testis	Upf2-null up with PTCs
Plcb4	ENSMUST00000110109	Bao et al. 2016	Stra8-Cre;Upf2fl/Δ testis, RNA-seq	mouse testis	Upf2-null up with PTCs
Plcb1	ENSMUST00000131552	Bao et al. 2016	Stra8-Cre;Upf2fl/Δ testis, RNA-seq	mouse testis	Upf2-null up with PTCs
Pla2g4b	ENSMUST00000110761	Bao et al. 2016	Stra8-Cre;Upf2fl/Δ testis, RNA-seq	mouse testis	Upf2-null up with PTCs
Pkdcc	ENSMUST00000166528	Bao et al. 2016	Stra8-Cre;Upf2fl/Δ testis, RNA-seq	mouse testis	Upf2-null up with PTCs
Pitpnb	ENSMUST00000086635	Bao et al. 2016	Stra8-Cre;Upf2fl/Δ testis, RNA-seq	mouse testis	Upf2-null up with PTCs
Pik3ca	ENSMUST00000108243	Bao et al. 2016	Stra8-Cre;Upf2fl/Δ testis, RNA-seq	mouse testis	Upf2-null up with PTCs
Pik3c3	ENSMUST00000115812	Bao et al. 2016	Stra8-Cre;Upf2fl/Δ testis, RNA-seq	mouse testis	Upf2-null up with PTCs
Piga	ENSMUST00000151911	Bao et al. 2016	Stra8-Cre;Upf2fl/Δ testis, RNA-seq	mouse testis	Upf2-null up with PTCs
Phlda3	ENSMUST00000038945	Bao et al. 2016	Stra8-Cre;Upf2fl/Δ testis, RNA-seq	mouse testis	Upf2-null up with PTCs
Phf8	ENSMUST00000151941	Bao et al. 2016	Stra8-Cre;Upf2fl/Δ testis, RNA-seq	mouse testis	Upf2-null up with PTCs
Phf12	ENSMUST00000049167	Bao et al. 2016	Stra8-Cre;Upf2fl/Δ testis, RNA-seq	mouse testis	Upf2-null up with PTCs
Phax	ENSMUST00000130163	Bao et al. 2016	Stra8-Cre;Upf2fl/Δ testis, RNA-seq	mouse testis	Upf2-null up with PTCs
Pgm2l1	ENSMUST00000054436	Bao et al. 2016	Stra8-Cre;Upf2fl/Δ testis, RNA-seq	mouse testis	Upf2-null up with PTCs
Pgk1	ENSMUST00000135949	Bao et al. 2016	Stra8-Cre;Upf2fl/Δ testis, RNA-seq	mouse testis	Upf2-null up with PTCs
Peg10	ENSMUST00000176204	Bao et al. 2016	Stra8-Cre;Upf2fl/Δ testis, RNA-seq	mouse testis	Upf2-null up with PTCs
Pdss1	ENSMUST00000053729	Bao et al. 2016	Stra8-Cre;Upf2fl/Δ testis, RNA-seq	mouse testis	Upf2-null up with PTCs
Pds5b	ENSMUST00000016569	Bao et al. 2016	Stra8-Cre;Upf2fl/Δ testis, RNA-seq	mouse testis	Upf2-null up with PTCs
Pdpr	ENSMUST00000144377	Bao et al. 2016	Stra8-Cre;Upf2fl/Δ testis, RNA-seq	mouse testis	Upf2-null up with PTCs
Pdk1	ENSMUST00000152696	Bao et al. 2016	Stra8-Cre;Upf2fl/Δ testis, RNA-seq	mouse testis	Upf2-null up with PTCs
Pdgfc	ENSMUST00000129285	Bao et al. 2016	Stra8-Cre;Upf2fl/Δ testis, RNA-seq	mouse testis	Upf2-null up with PTCs
Pcgf3	ENSMUST00000046975	Bao et al. 2016	Stra8-Cre;Upf2fl/Δ testis, RNA-seq	mouse testis	Upf2-null up with PTCs
Parvb	ENSMUST00000122818	Bao et al. 2016	Stra8-Cre;Upf2fl/Δ testis, RNA-seq	mouse testis	Upf2-null up with PTCs
Parp6	ENSMUST00000050483	Bao et al. 2016	Stra8-Cre;Upf2fl/Δ testis, RNA-seq	mouse testis	Upf2-null up with PTCs
Parp2	ENSMUST00000036126	Bao et al. 2016	Stra8-Cre;Upf2fl/Δ testis, RNA-seq	mouse testis	Upf2-null up with PTCs
Pard3b	ENSMUST00000138768	Bao et al. 2016	Stra8-Cre;Upf2fl/Δ testis, RNA-seq	mouse testis	Upf2-null up with PTCs
Paox	ENSMUST00000026537	Bao et al. 2016	Stra8-Cre;Upf2fl/Δ testis, RNA-seq	mouse testis	Upf2-null up with PTCs
Pan2	ENSMUST00000005825	Bao et al. 2016	Stra8-Cre;Upf2fl/Δ testis, RNA-seq	mouse testis	Upf2-null up with PTCs
Pak1	ENSMUST00000156637	Bao et al. 2016	Stra8-Cre;Upf2fl/Δ testis, RNA-seq	mouse testis	Upf2-null up with PTCs
Pabpc4	ENSMUST00000106241	Bao et al. 2016	Stra8-Cre;Upf2fl/Δ testis, RNA-seq	mouse testis	Upf2-null up with PTCs
P4ha2	ENSMUST00000093107	Bao et al. 2016	Stra8-Cre;Upf2fl/Δ testis, RNA-seq	mouse testis	Upf2-null up with PTCs
P4ha1	ENSMUST00000009789	Bao et al. 2016	Stra8-Cre;Upf2fl/Δ testis, RNA-seq	mouse testis	Upf2-null up with PTCs
P2rx4	ENSMUST00000152337	Bao et al. 2016	Stra8-Cre;Upf2fl/Δ testis, RNA-seq	mouse testis	Upf2-null up with PTCs
Oxa1l	ENSMUST00000000985	Bao et al. 2016	Stra8-Cre;Upf2fl/Δ testis, RNA-seq	mouse testis	Upf2-null up with PTCs
Osbpl8	ENSMUST00000095310	Bao et al. 2016	Stra8-Cre;Upf2fl/Δ testis, RNA-seq	mouse testis	Upf2-null up with PTCs
Orc6	ENSMUST00000170141	Bao et al. 2016	Stra8-Cre;Upf2fl/Δ testis, RNA-seq	mouse testis	Upf2-null up with PTCs
Ogt	ENSMUST00000119299	Bao et al. 2016	Stra8-Cre;Upf2fl/Δ testis, RNA-seq	mouse testis	Upf2-null up with PTCs
Ocrl	ENSMUST00000142719	Bao et al. 2016	Stra8-Cre;Upf2fl/Δ testis, RNA-seq	mouse testis	Upf2-null up with PTCs
Oasl2	ENSMUST00000171068	Bao et al. 2016	Stra8-Cre;Upf2fl/Δ testis, RNA-seq	mouse testis	Upf2-null up with PTCs
Nucb2	ENSMUST00000032895	Bao et al. 2016	Stra8-Cre;Upf2fl/Δ testis, RNA-seq	mouse testis	Upf2-null up with PTCs
Nt5dc3	ENSMUST00000099396	Bao et al. 2016	Stra8-Cre;Upf2fl/Δ testis, RNA-seq	mouse testis	Upf2-null up with PTCs
Nsd1	ENSMUST00000099490	Bao et al. 2016	Stra8-Cre;Upf2fl/Δ testis, RNA-seq	mouse testis	Upf2-null up with PTCs
Nrbp1	ENSMUST00000078312	Bao et al. 2016	Stra8-Cre;Upf2fl/Δ testis, RNA-seq	mouse testis	Upf2-null up with PTCs
Nptn	ENSMUST00000175945	Bao et al. 2016	Stra8-Cre;Upf2fl/Δ testis, RNA-seq	mouse testis	Upf2-null up with PTCs
Npdc1	ENSMUST00000055921	Bao et al. 2016	Stra8-Cre;Upf2fl/Δ testis, RNA-seq	mouse testis	Upf2-null up with PTCs
Notch2	ENSMUST00000107028	Bao et al. 2016	Stra8-Cre;Upf2fl/Δ testis, RNA-seq	mouse testis	Upf2-null up with PTCs
Nop58	ENSMUST00000027174	Bao et al. 2016	Stra8-Cre;Upf2fl/Δ testis, RNA-seq	mouse testis	Upf2-null up with PTCs
Nol9	ENSMUST00000084116	Bao et al. 2016	Stra8-Cre;Upf2fl/Δ testis, RNA-seq	mouse testis	Upf2-null up with PTCs
Nmt2	ENSMUST00000081932	Bao et al. 2016	Stra8-Cre;Upf2fl/Δ testis, RNA-seq	mouse testis	Upf2-null up with PTCs
Ninj1	ENSMUST00000131280	Bao et al. 2016	Stra8-Cre;Upf2fl/Δ testis, RNA-seq	mouse testis	Upf2-null up with PTCs
Nhlrc2	ENSMUST00000165411	Bao et al. 2016	Stra8-Cre;Upf2fl/Δ testis, RNA-seq	mouse testis	Upf2-null up with PTCs
Nfx1	ENSMUST00000098143	Bao et al. 2016	Stra8-Cre;Upf2fl/Δ testis, RNA-seq	mouse testis	Upf2-null up with PTCs
Nfat5	ENSMUST00000133026	Bao et al. 2016	Stra8-Cre;Upf2fl/Δ testis, RNA-seq	mouse testis	Upf2-null up with PTCs
Nedd4	ENSMUST00000034740	Bao et al. 2016	Stra8-Cre;Upf2fl/Δ testis, RNA-seq	mouse testis	Upf2-null up with PTCs
Nde1	ENSMUST00000132316	Bao et al. 2016	Stra8-Cre;Upf2fl/Δ testis, RNA-seq	mouse testis	Upf2-null up with PTCs
Ncrna00086	ENSMUST00000068106	Bao et al. 2016	Stra8-Cre;Upf2fl/Δ testis, RNA-seq	mouse testis	Upf2-null up with PTCs
Ncapg2	ENSMUST00000084828	Bao et al. 2016	Stra8-Cre;Upf2fl/Δ testis, RNA-seq	mouse testis	Upf2-null up with PTCs
Nbeal1	ENSMUST00000035569	Bao et al. 2016	Stra8-Cre;Upf2fl/Δ testis, RNA-seq	mouse testis	Upf2-null up with PTCs
Narg2	ENSMUST00000034761	Bao et al. 2016	Stra8-Cre;Upf2fl/Δ testis, RNA-seq	mouse testis	Upf2-null up with PTCs
Nampt	ENSMUST00000020886	Bao et al. 2016	Stra8-Cre;Upf2fl/Δ testis, RNA-seq	mouse testis	Upf2-null up with PTCs
Naa50	ENSMUST00000159514	Bao et al. 2016	Stra8-Cre;Upf2fl/Δ testis, RNA-seq	mouse testis	Upf2-null up with PTCs
Naa38	ENSMUST00000136982	Bao et al. 2016	Stra8-Cre;Upf2fl/Δ testis, RNA-seq	mouse testis	Upf2-null up with PTCs
Naa35	ENSMUST00000022038	Bao et al. 2016	Stra8-Cre;Upf2fl/Δ testis, RNA-seq	mouse testis	Upf2-null up with PTCs
Myo5a	ENSMUST00000123128	Bao et al. 2016	Stra8-Cre;Upf2fl/Δ testis, RNA-seq	mouse testis	Upf2-null up with PTCs
Mybbp1a	ENSMUST00000045633	Bao et al. 2016	Stra8-Cre;Upf2fl/Δ testis, RNA-seq	mouse testis	Upf2-null up with PTCs
Mtx3	ENSMUST00000076169	Bao et al. 2016	Stra8-Cre;Upf2fl/Δ testis, RNA-seq	mouse testis	Upf2-null up with PTCs
Mtmr1	ENSMUST00000114601	Bao et al. 2016	Stra8-Cre;Upf2fl/Δ testis, RNA-seq	mouse testis	Upf2-null up with PTCs
Mtfmt	ENSMUST00000074792	Bao et al. 2016	Stra8-Cre;Upf2fl/Δ testis, RNA-seq	mouse testis	Upf2-null up with PTCs
Msh2	ENSMUST00000024967	Bao et al. 2016	Stra8-Cre;Upf2fl/Δ testis, RNA-seq	mouse testis	Upf2-null up with PTCs
Mrps23	ENSMUST00000118784	Bao et al. 2016	Stra8-Cre;Upf2fl/Δ testis, RNA-seq	mouse testis	Upf2-null up with PTCs
Mrps10	ENSMUST00000119841	Bao et al. 2016	Stra8-Cre;Upf2fl/Δ testis, RNA-seq	mouse testis	Upf2-null up with PTCs
Mrpl3	ENSMUST00000035177	Bao et al. 2016	Stra8-Cre;Upf2fl/Δ testis, RNA-seq	mouse testis	Upf2-null up with PTCs
Mov10l1	ENSMUST00000146993	Bao et al. 2016	Stra8-Cre;Upf2fl/Δ testis, RNA-seq	mouse testis	Upf2-null up with PTCs
Morc2a	ENSMUST00000093389	Bao et al. 2016	Stra8-Cre;Upf2fl/Δ testis, RNA-seq	mouse testis	Upf2-null up with PTCs
Mocs2	ENSMUST00000166104	Bao et al. 2016	Stra8-Cre;Upf2fl/Δ testis, RNA-seq	mouse testis	Upf2-null up with PTCs
Mob4	ENSMUST00000161122	Bao et al. 2016	Stra8-Cre;Upf2fl/Δ testis, RNA-seq	mouse testis	Upf2-null up with PTCs
Mob1a	ENSMUST00000101245	Bao et al. 2016	Stra8-Cre;Upf2fl/Δ testis, RNA-seq	mouse testis	Upf2-null up with PTCs
Mlxipl	ENSMUST00000111201	Bao et al. 2016	Stra8-Cre;Upf2fl/Δ testis, RNA-seq	mouse testis	Upf2-null up with PTCs
Mlxip	ENSMUST00000068237	Bao et al. 2016	Stra8-Cre;Upf2fl/Δ testis, RNA-seq	mouse testis	Upf2-null up with PTCs
Mlx	ENSMUST00000145187	Bao et al. 2016	Stra8-Cre;Upf2fl/Δ testis, RNA-seq	mouse testis	Upf2-null up with PTCs
Mllt6	ENSMUST00000155835	Bao et al. 2016	Stra8-Cre;Upf2fl/Δ testis, RNA-seq	mouse testis	Upf2-null up with PTCs
Mki67ip	ENSMUST00000027626	Bao et al. 2016	Stra8-Cre;Upf2fl/Δ testis, RNA-seq	mouse testis	Upf2-null up with PTCs
Mical2	ENSMUST00000106649	Bao et al. 2016	Stra8-Cre;Upf2fl/Δ testis, RNA-seq	mouse testis	Upf2-null up with PTCs
Mgst1	ENSMUST00000120230	Bao et al. 2016	Stra8-Cre;Upf2fl/Δ testis, RNA-seq	mouse testis	Upf2-null up with PTCs
Mgat4b	ENSMUST00000151803	Bao et al. 2016	Stra8-Cre;Upf2fl/Δ testis, RNA-seq	mouse testis	Upf2-null up with PTCs
Mga	ENSMUST00000046717	Bao et al. 2016	Stra8-Cre;Upf2fl/Δ testis, RNA-seq	mouse testis	Upf2-null up with PTCs
Mettl2	ENSMUST00000021030	Bao et al. 2016	Stra8-Cre;Upf2fl/Δ testis, RNA-seq	mouse testis	Upf2-null up with PTCs
Mettl16	ENSMUST00000092912	Bao et al. 2016	Stra8-Cre;Upf2fl/Δ testis, RNA-seq	mouse testis	Upf2-null up with PTCs
Metap1d	ENSMUST00000037210	Bao et al. 2016	Stra8-Cre;Upf2fl/Δ testis, RNA-seq	mouse testis	Upf2-null up with PTCs
Mertk	ENSMUST00000014505	Bao et al. 2016	Stra8-Cre;Upf2fl/Δ testis, RNA-seq	mouse testis	Upf2-null up with PTCs
Med21	ENSMUST00000125539	Bao et al. 2016	Stra8-Cre;Upf2fl/Δ testis, RNA-seq	mouse testis	Upf2-null up with PTCs
Mdn1	ENSMUST00000071642	Bao et al. 2016	Stra8-Cre;Upf2fl/Δ testis, RNA-seq	mouse testis	Upf2-null up with PTCs
Mdh2	ENSMUST00000138101	Bao et al. 2016	Stra8-Cre;Upf2fl/Δ testis, RNA-seq	mouse testis	Upf2-null up with PTCs
Mcoln1	ENSMUST00000004683	Bao et al. 2016	Stra8-Cre;Upf2fl/Δ testis, RNA-seq	mouse testis	Upf2-null up with PTCs
Mcl1	ENSMUST00000037947	Bao et al. 2016	Stra8-Cre;Upf2fl/Δ testis, RNA-seq	mouse testis	Upf2-null up with PTCs
Mcam	ENSMUST00000034650	Bao et al. 2016	Stra8-Cre;Upf2fl/Δ testis, RNA-seq	mouse testis	Upf2-null up with PTCs
Mbd1	ENSMUST00000025446	Bao et al. 2016	Stra8-Cre;Upf2fl/Δ testis, RNA-seq	mouse testis	Upf2-null up with PTCs
Mavs	ENSMUST00000130597	Bao et al. 2016	Stra8-Cre;Upf2fl/Δ testis, RNA-seq	mouse testis	Upf2-null up with PTCs
Mapre1	ENSMUST00000028981	Bao et al. 2016	Stra8-Cre;Upf2fl/Δ testis, RNA-seq	mouse testis	Upf2-null up with PTCs
Mapk9	ENSMUST00000109179	Bao et al. 2016	Stra8-Cre;Upf2fl/Δ testis, RNA-seq	mouse testis	Upf2-null up with PTCs
Mapk14	ENSMUST00000114754	Bao et al. 2016	Stra8-Cre;Upf2fl/Δ testis, RNA-seq	mouse testis	Upf2-null up with PTCs
Map4k4	ENSMUST00000163854	Bao et al. 2016	Stra8-Cre;Upf2fl/Δ testis, RNA-seq	mouse testis	Upf2-null up with PTCs
Map3k4	ENSMUST00000115691	Bao et al. 2016	Stra8-Cre;Upf2fl/Δ testis, RNA-seq	mouse testis	Upf2-null up with PTCs
Map3k3	ENSMUST00000168703	Bao et al. 2016	Stra8-Cre;Upf2fl/Δ testis, RNA-seq	mouse testis	Upf2-null up with PTCs
Malt1	ENSMUST00000102868	Bao et al. 2016	Stra8-Cre;Upf2fl/Δ testis, RNA-seq	mouse testis	Upf2-null up with PTCs
M6pr	ENSMUST00000123093	Bao et al. 2016	Stra8-Cre;Upf2fl/Δ testis, RNA-seq	mouse testis	Upf2-null up with PTCs
Lyst	ENSMUST00000050664	Bao et al. 2016	Stra8-Cre;Upf2fl/Δ testis, RNA-seq	mouse testis	Upf2-null up with PTCs
Luc7l2	ENSMUST00000163047	Bao et al. 2016	Stra8-Cre;Upf2fl/Δ testis, RNA-seq	mouse testis	Upf2-null up with PTCs
Luc7l	ENSMUST00000114976	Bao et al. 2016	Stra8-Cre;Upf2fl/Δ testis, RNA-seq	mouse testis	Upf2-null up with PTCs
Lrrk2	ENSMUST00000060642	Bao et al. 2016	Stra8-Cre;Upf2fl/Δ testis, RNA-seq	mouse testis	Upf2-null up with PTCs
Lrrc40	ENSMUST00000072080	Bao et al. 2016	Stra8-Cre;Upf2fl/Δ testis, RNA-seq	mouse testis	Upf2-null up with PTCs
Lpl	ENSMUST00000168401	Bao et al. 2016	Stra8-Cre;Upf2fl/Δ testis, RNA-seq	mouse testis	Upf2-null up with PTCs
Lonp2	ENSMUST00000034141	Bao et al. 2016	Stra8-Cre;Upf2fl/Δ testis, RNA-seq	mouse testis	Upf2-null up with PTCs
Lgals4	ENSMUST00000066723	Bao et al. 2016	Stra8-Cre;Upf2fl/Δ testis, RNA-seq	mouse testis	Upf2-null up with PTCs
Lepre1	ENSMUST00000153940	Bao et al. 2016	Stra8-Cre;Upf2fl/Δ testis, RNA-seq	mouse testis	Upf2-null up with PTCs
Lbp	ENSMUST00000129811	Bao et al. 2016	Stra8-Cre;Upf2fl/Δ testis, RNA-seq	mouse testis	Upf2-null up with PTCs
Lass2	ENSMUST00000015858	Bao et al. 2016	Stra8-Cre;Upf2fl/Δ testis, RNA-seq	mouse testis	Upf2-null up with PTCs
Larp4	ENSMUST00000057632	Bao et al. 2016	Stra8-Cre;Upf2fl/Δ testis, RNA-seq	mouse testis	Upf2-null up with PTCs
Laptm5	ENSMUST00000116245	Bao et al. 2016	Stra8-Cre;Upf2fl/Δ testis, RNA-seq	mouse testis	Upf2-null up with PTCs
Lamb1	ENSMUST00000164919	Bao et al. 2016	Stra8-Cre;Upf2fl/Δ testis, RNA-seq	mouse testis	Upf2-null up with PTCs
Kptn	ENSMUST00000006178	Bao et al. 2016	Stra8-Cre;Upf2fl/Δ testis, RNA-seq	mouse testis	Upf2-null up with PTCs
Kndc1	ENSMUST00000053445	Bao et al. 2016	Stra8-Cre;Upf2fl/Δ testis, RNA-seq	mouse testis	Upf2-null up with PTCs
Klhl5	ENSMUST00000101191	Bao et al. 2016	Stra8-Cre;Upf2fl/Δ testis, RNA-seq	mouse testis	Upf2-null up with PTCs
Klhl23	ENSMUST00000053087	Bao et al. 2016	Stra8-Cre;Upf2fl/Δ testis, RNA-seq	mouse testis	Upf2-null up with PTCs
Kitl	ENSMUST00000099320	Bao et al. 2016	Stra8-Cre;Upf2fl/Δ testis, RNA-seq	mouse testis	Upf2-null up with PTCs
Kin	ENSMUST00000042512	Bao et al. 2016	Stra8-Cre;Upf2fl/Δ testis, RNA-seq	mouse testis	Upf2-null up with PTCs
Kidins220	ENSMUST00000110935	Bao et al. 2016	Stra8-Cre;Upf2fl/Δ testis, RNA-seq	mouse testis	Upf2-null up with PTCs
Kdm4c	ENSMUST00000030102	Bao et al. 2016	Stra8-Cre;Upf2fl/Δ testis, RNA-seq	mouse testis	Upf2-null up with PTCs
Kdm3b	ENSMUST00000043775	Bao et al. 2016	Stra8-Cre;Upf2fl/Δ testis, RNA-seq	mouse testis	Upf2-null up with PTCs
Kdelr2	ENSMUST00000110731	Bao et al. 2016	Stra8-Cre;Upf2fl/Δ testis, RNA-seq	mouse testis	Upf2-null up with PTCs
Kctd2	ENSMUST00000106534	Bao et al. 2016	Stra8-Cre;Upf2fl/Δ testis, RNA-seq	mouse testis	Upf2-null up with PTCs
Jtb	ENSMUST00000157045	Bao et al. 2016	Stra8-Cre;Upf2fl/Δ testis, RNA-seq	mouse testis	Upf2-null up with PTCs
Jak2	ENSMUST00000065796	Bao et al. 2016	Stra8-Cre;Upf2fl/Δ testis, RNA-seq	mouse testis	Upf2-null up with PTCs
Itpr1	ENSMUST00000171006	Bao et al. 2016	Stra8-Cre;Upf2fl/Δ testis, RNA-seq	mouse testis	Upf2-null up with PTCs
Itpa	ENSMUST00000133328	Bao et al. 2016	Stra8-Cre;Upf2fl/Δ testis, RNA-seq	mouse testis	Upf2-null up with PTCs
Itgb1	ENSMUST00000124826	Bao et al. 2016	Stra8-Cre;Upf2fl/Δ testis, RNA-seq	mouse testis	Upf2-null up with PTCs
Itgav	ENSMUST00000028499	Bao et al. 2016	Stra8-Cre;Upf2fl/Δ testis, RNA-seq	mouse testis	Upf2-null up with PTCs
Itga6	ENSMUST00000155249	Bao et al. 2016	Stra8-Cre;Upf2fl/Δ testis, RNA-seq	mouse testis	Upf2-null up with PTCs
Itch	ENSMUST00000109685	Bao et al. 2016	Stra8-Cre;Upf2fl/Δ testis, RNA-seq	mouse testis	Upf2-null up with PTCs
Irf1	ENSMUST00000142221	Bao et al. 2016	Stra8-Cre;Upf2fl/Δ testis, RNA-seq	mouse testis	Upf2-null up with PTCs
Inpp5b	ENSMUST00000154015	Bao et al. 2016	Stra8-Cre;Upf2fl/Δ testis, RNA-seq	mouse testis	Upf2-null up with PTCs
Il10rb	ENSMUST00000169076	Bao et al. 2016	Stra8-Cre;Upf2fl/Δ testis, RNA-seq	mouse testis	Upf2-null up with PTCs
Ifnar2	ENSMUST00000023693	Bao et al. 2016	Stra8-Cre;Upf2fl/Δ testis, RNA-seq	mouse testis	Upf2-null up with PTCs
Ifnar1	ENSMUST00000123196	Bao et al. 2016	Stra8-Cre;Upf2fl/Δ testis, RNA-seq	mouse testis	Upf2-null up with PTCs
Idh3a	ENSMUST00000034818	Bao et al. 2016	Stra8-Cre;Upf2fl/Δ testis, RNA-seq	mouse testis	Upf2-null up with PTCs
Iars	ENSMUST00000165316	Bao et al. 2016	Stra8-Cre;Upf2fl/Δ testis, RNA-seq	mouse testis	Upf2-null up with PTCs
Htatsf1	ENSMUST00000088652	Bao et al. 2016	Stra8-Cre;Upf2fl/Δ testis, RNA-seq	mouse testis	Upf2-null up with PTCs
Hspa8	ENSMUST00000149936	Bao et al. 2016	Stra8-Cre;Upf2fl/Δ testis, RNA-seq	mouse testis	Upf2-null up with PTCs
Hp1bp3	ENSMUST00000105827	Bao et al. 2016	Stra8-Cre;Upf2fl/Δ testis, RNA-seq	mouse testis	Upf2-null up with PTCs
Hoxd3	ENSMUST00000144040	Bao et al. 2016	Stra8-Cre;Upf2fl/Δ testis, RNA-seq	mouse testis	Upf2-null up with PTCs
Hnrnpul2	ENSMUST00000096753	Bao et al. 2016	Stra8-Cre;Upf2fl/Δ testis, RNA-seq	mouse testis	Upf2-null up with PTCs
Hmg20a	ENSMUST00000034879	Bao et al. 2016	Stra8-Cre;Upf2fl/Δ testis, RNA-seq	mouse testis	Upf2-null up with PTCs
Hltf	ENSMUST00000143005	Bao et al. 2016	Stra8-Cre;Upf2fl/Δ testis, RNA-seq	mouse testis	Upf2-null up with PTCs
Hira	ENSMUST00000004222	Bao et al. 2016	Stra8-Cre;Upf2fl/Δ testis, RNA-seq	mouse testis	Upf2-null up with PTCs
Heatr3	ENSMUST00000034079	Bao et al. 2016	Stra8-Cre;Upf2fl/Δ testis, RNA-seq	mouse testis	Upf2-null up with PTCs
Hddc2	ENSMUST00000160447	Bao et al. 2016	Stra8-Cre;Upf2fl/Δ testis, RNA-seq	mouse testis	Upf2-null up with PTCs
Hace1	ENSMUST00000037044	Bao et al. 2016	Stra8-Cre;Upf2fl/Δ testis, RNA-seq	mouse testis	Upf2-null up with PTCs
Gzf1	ENSMUST00000028928	Bao et al. 2016	Stra8-Cre;Upf2fl/Δ testis, RNA-seq	mouse testis	Upf2-null up with PTCs
Guf1	ENSMUST00000154728	Bao et al. 2016	Stra8-Cre;Upf2fl/Δ testis, RNA-seq	mouse testis	Upf2-null up with PTCs
Gsta3	ENSMUST00000124990	Bao et al. 2016	Stra8-Cre;Upf2fl/Δ testis, RNA-seq	mouse testis	Upf2-null up with PTCs
Gspt2	ENSMUST00000137033	Bao et al. 2016	Stra8-Cre;Upf2fl/Δ testis, RNA-seq	mouse testis	Upf2-null up with PTCs
Grn	ENSMUST00000049460	Bao et al. 2016	Stra8-Cre;Upf2fl/Δ testis, RNA-seq	mouse testis	Upf2-null up with PTCs
Grm7	ENSMUST00000071076	Bao et al. 2016	Stra8-Cre;Upf2fl/Δ testis, RNA-seq	mouse testis	Upf2-null up with PTCs
Grk5	ENSMUST00000003313	Bao et al. 2016	Stra8-Cre;Upf2fl/Δ testis, RNA-seq	mouse testis	Upf2-null up with PTCs
Grhpr	ENSMUST00000045078	Bao et al. 2016	Stra8-Cre;Upf2fl/Δ testis, RNA-seq	mouse testis	Upf2-null up with PTCs
Gpx3	ENSMUST00000125094	Bao et al. 2016	Stra8-Cre;Upf2fl/Δ testis, RNA-seq	mouse testis	Upf2-null up with PTCs
Gpx1	ENSMUST00000082429	Bao et al. 2016	Stra8-Cre;Upf2fl/Δ testis, RNA-seq	mouse testis	Upf2-null up with PTCs
Gpt2	ENSMUST00000034136	Bao et al. 2016	Stra8-Cre;Upf2fl/Δ testis, RNA-seq	mouse testis	Upf2-null up with PTCs
Gpkow	ENSMUST00000154562	Bao et al. 2016	Stra8-Cre;Upf2fl/Δ testis, RNA-seq	mouse testis	Upf2-null up with PTCs
Gnas	ENSMUST00000087871	Bao et al. 2016	Stra8-Cre;Upf2fl/Δ testis, RNA-seq	mouse testis	Upf2-null up with PTCs
Gm364	ENSMUST00000114725	Bao et al. 2016	Stra8-Cre;Upf2fl/Δ testis, RNA-seq	mouse testis	Upf2-null up with PTCs
Gm11744	ENSMUST00000148484	Bao et al. 2016	Stra8-Cre;Upf2fl/Δ testis, RNA-seq	mouse testis	Upf2-null up with PTCs
Gm10332	ENSMUST00000095853	Bao et al. 2016	Stra8-Cre;Upf2fl/Δ testis, RNA-seq	mouse testis	Upf2-null up with PTCs
Glud1	ENSMUST00000022322	Bao et al. 2016	Stra8-Cre;Upf2fl/Δ testis, RNA-seq	mouse testis	Upf2-null up with PTCs
Gk5	ENSMUST00000122383	Bao et al. 2016	Stra8-Cre;Upf2fl/Δ testis, RNA-seq	mouse testis	Upf2-null up with PTCs
Ggcx	ENSMUST00000065906	Bao et al. 2016	Stra8-Cre;Upf2fl/Δ testis, RNA-seq	mouse testis	Upf2-null up with PTCs
Gfpt2	ENSMUST00000020629	Bao et al. 2016	Stra8-Cre;Upf2fl/Δ testis, RNA-seq	mouse testis	Upf2-null up with PTCs
Gdi1	ENSMUST00000015435	Bao et al. 2016	Stra8-Cre;Upf2fl/Δ testis, RNA-seq	mouse testis	Upf2-null up with PTCs
Gbas	ENSMUST00000124342	Bao et al. 2016	Stra8-Cre;Upf2fl/Δ testis, RNA-seq	mouse testis	Upf2-null up with PTCs
Galnt1	ENSMUST00000170243	Bao et al. 2016	Stra8-Cre;Upf2fl/Δ testis, RNA-seq	mouse testis	Upf2-null up with PTCs
Gale	ENSMUST00000102541	Bao et al. 2016	Stra8-Cre;Upf2fl/Δ testis, RNA-seq	mouse testis	Upf2-null up with PTCs
Fubp3	ENSMUST00000113482	Bao et al. 2016	Stra8-Cre;Upf2fl/Δ testis, RNA-seq	mouse testis	Upf2-null up with PTCs
Fubp1	ENSMUST00000106121	Bao et al. 2016	Stra8-Cre;Upf2fl/Δ testis, RNA-seq	mouse testis	Upf2-null up with PTCs
Fndc5	ENSMUST00000102600	Bao et al. 2016	Stra8-Cre;Upf2fl/Δ testis, RNA-seq	mouse testis	Upf2-null up with PTCs
Fmr1	ENSMUST00000114649	Bao et al. 2016	Stra8-Cre;Upf2fl/Δ testis, RNA-seq	mouse testis	Upf2-null up with PTCs
Fmnl2	ENSMUST00000127122	Bao et al. 2016	Stra8-Cre;Upf2fl/Δ testis, RNA-seq	mouse testis	Upf2-null up with PTCs
Fchsd2	ENSMUST00000032931	Bao et al. 2016	Stra8-Cre;Upf2fl/Δ testis, RNA-seq	mouse testis	Upf2-null up with PTCs
Fbxw11	ENSMUST00000143290	Bao et al. 2016	Stra8-Cre;Upf2fl/Δ testis, RNA-seq	mouse testis	Upf2-null up with PTCs
Fbxo22	ENSMUST00000153970	Bao et al. 2016	Stra8-Cre;Upf2fl/Δ testis, RNA-seq	mouse testis	Upf2-null up with PTCs
Fam73b	ENSMUST00000100214	Bao et al. 2016	Stra8-Cre;Upf2fl/Δ testis, RNA-seq	mouse testis	Upf2-null up with PTCs
Fam50a	ENSMUST00000165544	Bao et al. 2016	Stra8-Cre;Upf2fl/Δ testis, RNA-seq	mouse testis	Upf2-null up with PTCs
Fam40b	ENSMUST00000046028	Bao et al. 2016	Stra8-Cre;Upf2fl/Δ testis, RNA-seq	mouse testis	Upf2-null up with PTCs
Fam33a	ENSMUST00000142263	Bao et al. 2016	Stra8-Cre;Upf2fl/Δ testis, RNA-seq	mouse testis	Upf2-null up with PTCs
Fam178a	ENSMUST00000164268	Bao et al. 2016	Stra8-Cre;Upf2fl/Δ testis, RNA-seq	mouse testis	Upf2-null up with PTCs
Fam102a	ENSMUST00000136816	Bao et al. 2016	Stra8-Cre;Upf2fl/Δ testis, RNA-seq	mouse testis	Upf2-null up with PTCs
Fabp5	ENSMUST00000123744	Bao et al. 2016	Stra8-Cre;Upf2fl/Δ testis, RNA-seq	mouse testis	Upf2-null up with PTCs
F11r	ENSMUST00000144497	Bao et al. 2016	Stra8-Cre;Upf2fl/Δ testis, RNA-seq	mouse testis	Upf2-null up with PTCs
Extl2	ENSMUST00000029575	Bao et al. 2016	Stra8-Cre;Upf2fl/Δ testis, RNA-seq	mouse testis	Upf2-null up with PTCs
Etnk2	ENSMUST00000135222	Bao et al. 2016	Stra8-Cre;Upf2fl/Δ testis, RNA-seq	mouse testis	Upf2-null up with PTCs
Etl4	ENSMUST00000114610	Bao et al. 2016	Stra8-Cre;Upf2fl/Δ testis, RNA-seq	mouse testis	Upf2-null up with PTCs
Ercc8	ENSMUST00000123657	Bao et al. 2016	Stra8-Cre;Upf2fl/Δ testis, RNA-seq	mouse testis	Upf2-null up with PTCs
Eprs	ENSMUST00000046514	Bao et al. 2016	Stra8-Cre;Upf2fl/Δ testis, RNA-seq	mouse testis	Upf2-null up with PTCs
Epm2aip1	ENSMUST00000135807	Bao et al. 2016	Stra8-Cre;Upf2fl/Δ testis, RNA-seq	mouse testis	Upf2-null up with PTCs
Eny2	ENSMUST00000060652	Bao et al. 2016	Stra8-Cre;Upf2fl/Δ testis, RNA-seq	mouse testis	Upf2-null up with PTCs
Entpd2	ENSMUST00000114287	Bao et al. 2016	Stra8-Cre;Upf2fl/Δ testis, RNA-seq	mouse testis	Upf2-null up with PTCs
Enpp5	ENSMUST00000126032	Bao et al. 2016	Stra8-Cre;Upf2fl/Δ testis, RNA-seq	mouse testis	Upf2-null up with PTCs
Enoph1	ENSMUST00000031268	Bao et al. 2016	Stra8-Cre;Upf2fl/Δ testis, RNA-seq	mouse testis	Upf2-null up with PTCs
Elovl5	ENSMUST00000034904	Bao et al. 2016	Stra8-Cre;Upf2fl/Δ testis, RNA-seq	mouse testis	Upf2-null up with PTCs
Elk4	ENSMUST00000027696	Bao et al. 2016	Stra8-Cre;Upf2fl/Δ testis, RNA-seq	mouse testis	Upf2-null up with PTCs
Eif2s3y	ENSMUST00000091197	Bao et al. 2016	Stra8-Cre;Upf2fl/Δ testis, RNA-seq	mouse testis	Upf2-null up with PTCs
Eif2ak4	ENSMUST00000102527	Bao et al. 2016	Stra8-Cre;Upf2fl/Δ testis, RNA-seq	mouse testis	Upf2-null up with PTCs
Eif2a	ENSMUST00000135876	Bao et al. 2016	Stra8-Cre;Upf2fl/Δ testis, RNA-seq	mouse testis	Upf2-null up with PTCs
Efha2	ENSMUST00000068999	Bao et al. 2016	Stra8-Cre;Upf2fl/Δ testis, RNA-seq	mouse testis	Upf2-null up with PTCs
Efemp2	ENSMUST00000165485	Bao et al. 2016	Stra8-Cre;Upf2fl/Δ testis, RNA-seq	mouse testis	Upf2-null up with PTCs
Efemp1	ENSMUST00000020759	Bao et al. 2016	Stra8-Cre;Upf2fl/Δ testis, RNA-seq	mouse testis	Upf2-null up with PTCs
Eef1b2	ENSMUST00000142062	Bao et al. 2016	Stra8-Cre;Upf2fl/Δ testis, RNA-seq	mouse testis	Upf2-null up with PTCs
Edem3	ENSMUST00000163169	Bao et al. 2016	Stra8-Cre;Upf2fl/Δ testis, RNA-seq	mouse testis	Upf2-null up with PTCs
Edem1	ENSMUST00000089162	Bao et al. 2016	Stra8-Cre;Upf2fl/Δ testis, RNA-seq	mouse testis	Upf2-null up with PTCs
Drp2	ENSMUST00000113224	Bao et al. 2016	Stra8-Cre;Upf2fl/Δ testis, RNA-seq	mouse testis	Upf2-null up with PTCs
Dph5	ENSMUST00000150064	Bao et al. 2016	Stra8-Cre;Upf2fl/Δ testis, RNA-seq	mouse testis	Upf2-null up with PTCs
Dopey1	ENSMUST00000034987	Bao et al. 2016	Stra8-Cre;Upf2fl/Δ testis, RNA-seq	mouse testis	Upf2-null up with PTCs
Dnmt3a	ENSMUST00000174483	Bao et al. 2016	Stra8-Cre;Upf2fl/Δ testis, RNA-seq	mouse testis	Upf2-null up with PTCs
Dnajc5	ENSMUST00000116365	Bao et al. 2016	Stra8-Cre;Upf2fl/Δ testis, RNA-seq	mouse testis	Upf2-null up with PTCs
Dmxl1	ENSMUST00000041772	Bao et al. 2016	Stra8-Cre;Upf2fl/Δ testis, RNA-seq	mouse testis	Upf2-null up with PTCs
Dmrtc1b	ENSMUST00000118842	Bao et al. 2016	Stra8-Cre;Upf2fl/Δ testis, RNA-seq	mouse testis	Upf2-null up with PTCs
Dkc1	ENSMUST00000033776	Bao et al. 2016	Stra8-Cre;Upf2fl/Δ testis, RNA-seq	mouse testis	Upf2-null up with PTCs
Dip2c	ENSMUST00000062376	Bao et al. 2016	Stra8-Cre;Upf2fl/Δ testis, RNA-seq	mouse testis	Upf2-null up with PTCs
Dhrs3	ENSMUST00000084184	Bao et al. 2016	Stra8-Cre;Upf2fl/Δ testis, RNA-seq	mouse testis	Upf2-null up with PTCs
Dhcr24	ENSMUST00000047973	Bao et al. 2016	Stra8-Cre;Upf2fl/Δ testis, RNA-seq	mouse testis	Upf2-null up with PTCs
Derl3	ENSMUST00000009236	Bao et al. 2016	Stra8-Cre;Upf2fl/Δ testis, RNA-seq	mouse testis	Upf2-null up with PTCs
Dennd2c	ENSMUST00000166143	Bao et al. 2016	Stra8-Cre;Upf2fl/Δ testis, RNA-seq	mouse testis	Upf2-null up with PTCs
Ddx55	ENSMUST00000071057	Bao et al. 2016	Stra8-Cre;Upf2fl/Δ testis, RNA-seq	mouse testis	Upf2-null up with PTCs
Ddx52	ENSMUST00000049257	Bao et al. 2016	Stra8-Cre;Upf2fl/Δ testis, RNA-seq	mouse testis	Upf2-null up with PTCs
Ddx43	ENSMUST00000113367	Bao et al. 2016	Stra8-Cre;Upf2fl/Δ testis, RNA-seq	mouse testis	Upf2-null up with PTCs
Ddx3x	ENSMUST00000000804	Bao et al. 2016	Stra8-Cre;Upf2fl/Δ testis, RNA-seq	mouse testis	Upf2-null up with PTCs
Ddx26b	ENSMUST00000134138	Bao et al. 2016	Stra8-Cre;Upf2fl/Δ testis, RNA-seq	mouse testis	Upf2-null up with PTCs
Dctd	ENSMUST00000174818	Bao et al. 2016	Stra8-Cre;Upf2fl/Δ testis, RNA-seq	mouse testis	Upf2-null up with PTCs
Dclre1c	ENSMUST00000115066	Bao et al. 2016	Stra8-Cre;Upf2fl/Δ testis, RNA-seq	mouse testis	Upf2-null up with PTCs
Dcaf4	ENSMUST00000021645	Bao et al. 2016	Stra8-Cre;Upf2fl/Δ testis, RNA-seq	mouse testis	Upf2-null up with PTCs
Dbt	ENSMUST00000000349	Bao et al. 2016	Stra8-Cre;Upf2fl/Δ testis, RNA-seq	mouse testis	Upf2-null up with PTCs
Dab2	ENSMUST00000080880	Bao et al. 2016	Stra8-Cre;Upf2fl/Δ testis, RNA-seq	mouse testis	Upf2-null up with PTCs
D930016D06Rik	ENSMUST00000170099	Bao et al. 2016	Stra8-Cre;Upf2fl/Δ testis, RNA-seq	mouse testis	Upf2-null up with PTCs
D4Wsu53e	ENSMUST00000148900	Bao et al. 2016	Stra8-Cre;Upf2fl/Δ testis, RNA-seq	mouse testis	Upf2-null up with PTCs
D19Wsu162e	ENSMUST00000132202	Bao et al. 2016	Stra8-Cre;Upf2fl/Δ testis, RNA-seq	mouse testis	Upf2-null up with PTCs
Cyp20a1	ENSMUST00000148443	Bao et al. 2016	Stra8-Cre;Upf2fl/Δ testis, RNA-seq	mouse testis	Upf2-null up with PTCs
Cyb5rl	ENSMUST00000156406	Bao et al. 2016	Stra8-Cre;Upf2fl/Δ testis, RNA-seq	mouse testis	Upf2-null up with PTCs
Cyb5r1	ENSMUST00000154237	Bao et al. 2016	Stra8-Cre;Upf2fl/Δ testis, RNA-seq	mouse testis	Upf2-null up with PTCs
Cx3cl1	ENSMUST00000150307	Bao et al. 2016	Stra8-Cre;Upf2fl/Δ testis, RNA-seq	mouse testis	Upf2-null up with PTCs
Ctso	ENSMUST00000029649	Bao et al. 2016	Stra8-Cre;Upf2fl/Δ testis, RNA-seq	mouse testis	Upf2-null up with PTCs
Ctsh	ENSMUST00000127842	Bao et al. 2016	Stra8-Cre;Upf2fl/Δ testis, RNA-seq	mouse testis	Upf2-null up with PTCs
Ctsf	ENSMUST00000119694	Bao et al. 2016	Stra8-Cre;Upf2fl/Δ testis, RNA-seq	mouse testis	Upf2-null up with PTCs
Ctsa	ENSMUST00000155061	Bao et al. 2016	Stra8-Cre;Upf2fl/Δ testis, RNA-seq	mouse testis	Upf2-null up with PTCs
Ctps2	ENSMUST00000033727	Bao et al. 2016	Stra8-Cre;Upf2fl/Δ testis, RNA-seq	mouse testis	Upf2-null up with PTCs
Ctnnb1	ENSMUST00000154356	Bao et al. 2016	Stra8-Cre;Upf2fl/Δ testis, RNA-seq	mouse testis	Upf2-null up with PTCs
Cstf3	ENSMUST00000028599	Bao et al. 2016	Stra8-Cre;Upf2fl/Δ testis, RNA-seq	mouse testis	Upf2-null up with PTCs
Csrp2bp	ENSMUST00000156410	Bao et al. 2016	Stra8-Cre;Upf2fl/Δ testis, RNA-seq	mouse testis	Upf2-null up with PTCs
Cse1l	ENSMUST00000169290	Bao et al. 2016	Stra8-Cre;Upf2fl/Δ testis, RNA-seq	mouse testis	Upf2-null up with PTCs
Csdc2	ENSMUST00000038757	Bao et al. 2016	Stra8-Cre;Upf2fl/Δ testis, RNA-seq	mouse testis	Upf2-null up with PTCs
Crtc2	ENSMUST00000029545	Bao et al. 2016	Stra8-Cre;Upf2fl/Δ testis, RNA-seq	mouse testis	Upf2-null up with PTCs
Crebzf	ENSMUST00000107205	Bao et al. 2016	Stra8-Cre;Upf2fl/Δ testis, RNA-seq	mouse testis	Upf2-null up with PTCs
Creb1	ENSMUST00000049932	Bao et al. 2016	Stra8-Cre;Upf2fl/Δ testis, RNA-seq	mouse testis	Upf2-null up with PTCs
Cpsf3l	ENSMUST00000134678	Bao et al. 2016	Stra8-Cre;Upf2fl/Δ testis, RNA-seq	mouse testis	Upf2-null up with PTCs
Cp	ENSMUST00000108329	Bao et al. 2016	Stra8-Cre;Upf2fl/Δ testis, RNA-seq	mouse testis	Upf2-null up with PTCs
Copz2	ENSMUST00000018816	Bao et al. 2016	Stra8-Cre;Upf2fl/Δ testis, RNA-seq	mouse testis	Upf2-null up with PTCs
Copa	ENSMUST00000135192	Bao et al. 2016	Stra8-Cre;Upf2fl/Δ testis, RNA-seq	mouse testis	Upf2-null up with PTCs
Col3a1	ENSMUST00000087883	Bao et al. 2016	Stra8-Cre;Upf2fl/Δ testis, RNA-seq	mouse testis	Upf2-null up with PTCs
Col1a2	ENSMUST00000031668	Bao et al. 2016	Stra8-Cre;Upf2fl/Δ testis, RNA-seq	mouse testis	Upf2-null up with PTCs
Cmas	ENSMUST00000133248	Bao et al. 2016	Stra8-Cre;Upf2fl/Δ testis, RNA-seq	mouse testis	Upf2-null up with PTCs
Clybl	ENSMUST00000026625	Bao et al. 2016	Stra8-Cre;Upf2fl/Δ testis, RNA-seq	mouse testis	Upf2-null up with PTCs
Clu	ENSMUST00000138665	Bao et al. 2016	Stra8-Cre;Upf2fl/Δ testis, RNA-seq	mouse testis	Upf2-null up with PTCs
Clspn	ENSMUST00000126512	Bao et al. 2016	Stra8-Cre;Upf2fl/Δ testis, RNA-seq	mouse testis	Upf2-null up with PTCs
Clcn7	ENSMUST00000040729	Bao et al. 2016	Stra8-Cre;Upf2fl/Δ testis, RNA-seq	mouse testis	Upf2-null up with PTCs
Chsy1	ENSMUST00000036372	Bao et al. 2016	Stra8-Cre;Upf2fl/Δ testis, RNA-seq	mouse testis	Upf2-null up with PTCs
Chpf2	ENSMUST00000088295	Bao et al. 2016	Stra8-Cre;Upf2fl/Δ testis, RNA-seq	mouse testis	Upf2-null up with PTCs
Chordc1	ENSMUST00000001825	Bao et al. 2016	Stra8-Cre;Upf2fl/Δ testis, RNA-seq	mouse testis	Upf2-null up with PTCs
Chek2	ENSMUST00000066160	Bao et al. 2016	Stra8-Cre;Upf2fl/Δ testis, RNA-seq	mouse testis	Upf2-null up with PTCs
Cflar	ENSMUST00000140940	Bao et al. 2016	Stra8-Cre;Upf2fl/Δ testis, RNA-seq	mouse testis	Upf2-null up with PTCs
Cenpk	ENSMUST00000099187	Bao et al. 2016	Stra8-Cre;Upf2fl/Δ testis, RNA-seq	mouse testis	Upf2-null up with PTCs
Cdk12	ENSMUST00000092733	Bao et al. 2016	Stra8-Cre;Upf2fl/Δ testis, RNA-seq	mouse testis	Upf2-null up with PTCs
Cdc7	ENSMUST00000118261	Bao et al. 2016	Stra8-Cre;Upf2fl/Δ testis, RNA-seq	mouse testis	Upf2-null up with PTCs
Cdc42bpa	ENSMUST00000111117	Bao et al. 2016	Stra8-Cre;Upf2fl/Δ testis, RNA-seq	mouse testis	Upf2-null up with PTCs
Cd81	ENSMUST00000037941	Bao et al. 2016	Stra8-Cre;Upf2fl/Δ testis, RNA-seq	mouse testis	Upf2-null up with PTCs
Cd74	ENSMUST00000167610	Bao et al. 2016	Stra8-Cre;Upf2fl/Δ testis, RNA-seq	mouse testis	Upf2-null up with PTCs
Ccndbp1	ENSMUST00000060455	Bao et al. 2016	Stra8-Cre;Upf2fl/Δ testis, RNA-seq	mouse testis	Upf2-null up with PTCs
Ccl25	ENSMUST00000155797	Bao et al. 2016	Stra8-Cre;Upf2fl/Δ testis, RNA-seq	mouse testis	Upf2-null up with PTCs
Ccdc59	ENSMUST00000020049	Bao et al. 2016	Stra8-Cre;Upf2fl/Δ testis, RNA-seq	mouse testis	Upf2-null up with PTCs
Ccdc137	ENSMUST00000058370	Bao et al. 2016	Stra8-Cre;Upf2fl/Δ testis, RNA-seq	mouse testis	Upf2-null up with PTCs
Ccdc122	ENSMUST00000175810	Bao et al. 2016	Stra8-Cre;Upf2fl/Δ testis, RNA-seq	mouse testis	Upf2-null up with PTCs
Ccbl2	ENSMUST00000129775	Bao et al. 2016	Stra8-Cre;Upf2fl/Δ testis, RNA-seq	mouse testis	Upf2-null up with PTCs
Cc2d1b	ENSMUST00000030320	Bao et al. 2016	Stra8-Cre;Upf2fl/Δ testis, RNA-seq	mouse testis	Upf2-null up with PTCs
Cbx1	ENSMUST00000134585	Bao et al. 2016	Stra8-Cre;Upf2fl/Δ testis, RNA-seq	mouse testis	Upf2-null up with PTCs
Cbfb	ENSMUST00000109392	Bao et al. 2016	Stra8-Cre;Upf2fl/Δ testis, RNA-seq	mouse testis	Upf2-null up with PTCs
Casp8ap2	ENSMUST00000127619	Bao et al. 2016	Stra8-Cre;Upf2fl/Δ testis, RNA-seq	mouse testis	Upf2-null up with PTCs
Casp8	ENSMUST00000027189	Bao et al. 2016	Stra8-Cre;Upf2fl/Δ testis, RNA-seq	mouse testis	Upf2-null up with PTCs
Capza2	ENSMUST00000130606	Bao et al. 2016	Stra8-Cre;Upf2fl/Δ testis, RNA-seq	mouse testis	Upf2-null up with PTCs
Capn7	ENSMUST00000143472	Bao et al. 2016	Stra8-Cre;Upf2fl/Δ testis, RNA-seq	mouse testis	Upf2-null up with PTCs
Calu	ENSMUST00000174096	Bao et al. 2016	Stra8-Cre;Upf2fl/Δ testis, RNA-seq	mouse testis	Upf2-null up with PTCs
C030046E11Rik	ENSMUST00000043610	Bao et al. 2016	Stra8-Cre;Upf2fl/Δ testis, RNA-seq	mouse testis	Upf2-null up with PTCs
Butr1	ENSMUST00000108818	Bao et al. 2016	Stra8-Cre;Upf2fl/Δ testis, RNA-seq	mouse testis	Upf2-null up with PTCs
Btd	ENSMUST00000128014	Bao et al. 2016	Stra8-Cre;Upf2fl/Δ testis, RNA-seq	mouse testis	Upf2-null up with PTCs
Brms1l	ENSMUST00000012220	Bao et al. 2016	Stra8-Cre;Upf2fl/Δ testis, RNA-seq	mouse testis	Upf2-null up with PTCs
Blmh	ENSMUST00000021197	Bao et al. 2016	Stra8-Cre;Upf2fl/Δ testis, RNA-seq	mouse testis	Upf2-null up with PTCs
Bgn	ENSMUST00000169489	Bao et al. 2016	Stra8-Cre;Upf2fl/Δ testis, RNA-seq	mouse testis	Upf2-null up with PTCs
Bclaf1	ENSMUST00000043881	Bao et al. 2016	Stra8-Cre;Upf2fl/Δ testis, RNA-seq	mouse testis	Upf2-null up with PTCs
Bckdk	ENSMUST00000146574	Bao et al. 2016	Stra8-Cre;Upf2fl/Δ testis, RNA-seq	mouse testis	Upf2-null up with PTCs
BC065397	ENSMUST00000134066	Bao et al. 2016	Stra8-Cre;Upf2fl/Δ testis, RNA-seq	mouse testis	Upf2-null up with PTCs
BC031353	ENSMUST00000170846	Bao et al. 2016	Stra8-Cre;Upf2fl/Δ testis, RNA-seq	mouse testis	Upf2-null up with PTCs
BC026590	ENSMUST00000152638	Bao et al. 2016	Stra8-Cre;Upf2fl/Δ testis, RNA-seq	mouse testis	Upf2-null up with PTCs
B4galt7	ENSMUST00000064701	Bao et al. 2016	Stra8-Cre;Upf2fl/Δ testis, RNA-seq	mouse testis	Upf2-null up with PTCs
B3gat3	ENSMUST00000096243	Bao et al. 2016	Stra8-Cre;Upf2fl/Δ testis, RNA-seq	mouse testis	Upf2-null up with PTCs
B3galnt2	ENSMUST00000099747	Bao et al. 2016	Stra8-Cre;Upf2fl/Δ testis, RNA-seq	mouse testis	Upf2-null up with PTCs
Avl9	ENSMUST00000031805	Bao et al. 2016	Stra8-Cre;Upf2fl/Δ testis, RNA-seq	mouse testis	Upf2-null up with PTCs
AU015836	ENSMUST00000121565	Bao et al. 2016	Stra8-Cre;Upf2fl/Δ testis, RNA-seq	mouse testis	Upf2-null up with PTCs
Atp6ap1	ENSMUST00000019231	Bao et al. 2016	Stra8-Cre;Upf2fl/Δ testis, RNA-seq	mouse testis	Upf2-null up with PTCs
Atp13a1	ENSMUST00000034326	Bao et al. 2016	Stra8-Cre;Upf2fl/Δ testis, RNA-seq	mouse testis	Upf2-null up with PTCs
Atp11b	ENSMUST00000029257	Bao et al. 2016	Stra8-Cre;Upf2fl/Δ testis, RNA-seq	mouse testis	Upf2-null up with PTCs
Atg5	ENSMUST00000039286	Bao et al. 2016	Stra8-Cre;Upf2fl/Δ testis, RNA-seq	mouse testis	Upf2-null up with PTCs
Atg4b	ENSMUST00000027502	Bao et al. 2016	Stra8-Cre;Upf2fl/Δ testis, RNA-seq	mouse testis	Upf2-null up with PTCs
Atg16l1	ENSMUST00000151037	Bao et al. 2016	Stra8-Cre;Upf2fl/Δ testis, RNA-seq	mouse testis	Upf2-null up with PTCs
Atf4	ENSMUST00000109605	Bao et al. 2016	Stra8-Cre;Upf2fl/Δ testis, RNA-seq	mouse testis	Upf2-null up with PTCs
Atad5	ENSMUST00000017694	Bao et al. 2016	Stra8-Cre;Upf2fl/Δ testis, RNA-seq	mouse testis	Upf2-null up with PTCs
Asxl2	ENSMUST00000111215	Bao et al. 2016	Stra8-Cre;Upf2fl/Δ testis, RNA-seq	mouse testis	Upf2-null up with PTCs
Arpc5	ENSMUST00000077755	Bao et al. 2016	Stra8-Cre;Upf2fl/Δ testis, RNA-seq	mouse testis	Upf2-null up with PTCs
Arpc1b	ENSMUST00000085679	Bao et al. 2016	Stra8-Cre;Upf2fl/Δ testis, RNA-seq	mouse testis	Upf2-null up with PTCs
Arl8a	ENSMUST00000125774	Bao et al. 2016	Stra8-Cre;Upf2fl/Δ testis, RNA-seq	mouse testis	Upf2-null up with PTCs
Arid4b	ENSMUST00000110534	Bao et al. 2016	Stra8-Cre;Upf2fl/Δ testis, RNA-seq	mouse testis	Upf2-null up with PTCs
Arid4a	ENSMUST00000134718	Bao et al. 2016	Stra8-Cre;Upf2fl/Δ testis, RNA-seq	mouse testis	Upf2-null up with PTCs
Arhgef1	ENSMUST00000098683	Bao et al. 2016	Stra8-Cre;Upf2fl/Δ testis, RNA-seq	mouse testis	Upf2-null up with PTCs
Arhgap32	ENSMUST00000174641	Bao et al. 2016	Stra8-Cre;Upf2fl/Δ testis, RNA-seq	mouse testis	Upf2-null up with PTCs
Arhgap20	ENSMUST00000065496	Bao et al. 2016	Stra8-Cre;Upf2fl/Δ testis, RNA-seq	mouse testis	Upf2-null up with PTCs
Arhgap1	ENSMUST00000111329	Bao et al. 2016	Stra8-Cre;Upf2fl/Δ testis, RNA-seq	mouse testis	Upf2-null up with PTCs
Araf	ENSMUST00000136451	Bao et al. 2016	Stra8-Cre;Upf2fl/Δ testis, RNA-seq	mouse testis	Upf2-null up with PTCs
Apobec3	ENSMUST00000109620	Bao et al. 2016	Stra8-Cre;Upf2fl/Δ testis, RNA-seq	mouse testis	Upf2-null up with PTCs
Apc	ENSMUST00000079362	Bao et al. 2016	Stra8-Cre;Upf2fl/Δ testis, RNA-seq	mouse testis	Upf2-null up with PTCs
Ap4e1	ENSMUST00000149254	Bao et al. 2016	Stra8-Cre;Upf2fl/Δ testis, RNA-seq	mouse testis	Upf2-null up with PTCs
Ap2m1	ENSMUST00000007216	Bao et al. 2016	Stra8-Cre;Upf2fl/Δ testis, RNA-seq	mouse testis	Upf2-null up with PTCs
Ap1s2	ENSMUST00000140845	Bao et al. 2016	Stra8-Cre;Upf2fl/Δ testis, RNA-seq	mouse testis	Upf2-null up with PTCs
Aox1	ENSMUST00000001027	Bao et al. 2016	Stra8-Cre;Upf2fl/Δ testis, RNA-seq	mouse testis	Upf2-null up with PTCs
Anp32e	ENSMUST00000169426	Bao et al. 2016	Stra8-Cre;Upf2fl/Δ testis, RNA-seq	mouse testis	Upf2-null up with PTCs
Anp32a	ENSMUST00000156461	Bao et al. 2016	Stra8-Cre;Upf2fl/Δ testis, RNA-seq	mouse testis	Upf2-null up with PTCs
Ankrd16	ENSMUST00000056108	Bao et al. 2016	Stra8-Cre;Upf2fl/Δ testis, RNA-seq	mouse testis	Upf2-null up with PTCs
Ankfy1	ENSMUST00000127610	Bao et al. 2016	Stra8-Cre;Upf2fl/Δ testis, RNA-seq	mouse testis	Upf2-null up with PTCs
Anapc4	ENSMUST00000144574	Bao et al. 2016	Stra8-Cre;Upf2fl/Δ testis, RNA-seq	mouse testis	Upf2-null up with PTCs
Als2cl	ENSMUST00000155014	Bao et al. 2016	Stra8-Cre;Upf2fl/Δ testis, RNA-seq	mouse testis	Upf2-null up with PTCs
Alkbh6	ENSMUST00000060834	Bao et al. 2016	Stra8-Cre;Upf2fl/Δ testis, RNA-seq	mouse testis	Upf2-null up with PTCs
Alg5	ENSMUST00000155273	Bao et al. 2016	Stra8-Cre;Upf2fl/Δ testis, RNA-seq	mouse testis	Upf2-null up with PTCs
Aldh4a1	ENSMUST00000039818	Bao et al. 2016	Stra8-Cre;Upf2fl/Δ testis, RNA-seq	mouse testis	Upf2-null up with PTCs
Akr1c13	ENSMUST00000128892	Bao et al. 2016	Stra8-Cre;Upf2fl/Δ testis, RNA-seq	mouse testis	Upf2-null up with PTCs
Akr1b10	ENSMUST00000139156	Bao et al. 2016	Stra8-Cre;Upf2fl/Δ testis, RNA-seq	mouse testis	Upf2-null up with PTCs
Aif1l	ENSMUST00000001920	Bao et al. 2016	Stra8-Cre;Upf2fl/Δ testis, RNA-seq	mouse testis	Upf2-null up with PTCs
Agps	ENSMUST00000047232	Bao et al. 2016	Stra8-Cre;Upf2fl/Δ testis, RNA-seq	mouse testis	Upf2-null up with PTCs
Agpat5	ENSMUST00000149565	Bao et al. 2016	Stra8-Cre;Upf2fl/Δ testis, RNA-seq	mouse testis	Upf2-null up with PTCs
Agpat4	ENSMUST00000024594	Bao et al. 2016	Stra8-Cre;Upf2fl/Δ testis, RNA-seq	mouse testis	Upf2-null up with PTCs
Agk	ENSMUST00000031977	Bao et al. 2016	Stra8-Cre;Upf2fl/Δ testis, RNA-seq	mouse testis	Upf2-null up with PTCs
Aebp2	ENSMUST00000159979	Bao et al. 2016	Stra8-Cre;Upf2fl/Δ testis, RNA-seq	mouse testis	Upf2-null up with PTCs
Adpgk	ENSMUST00000068923	Bao et al. 2016	Stra8-Cre;Upf2fl/Δ testis, RNA-seq	mouse testis	Upf2-null up with PTCs
Adhfe1	ENSMUST00000027044	Bao et al. 2016	Stra8-Cre;Upf2fl/Δ testis, RNA-seq	mouse testis	Upf2-null up with PTCs
Adh1	ENSMUST00000159159	Bao et al. 2016	Stra8-Cre;Upf2fl/Δ testis, RNA-seq	mouse testis	Upf2-null up with PTCs
Adar	ENSMUST00000118341	Bao et al. 2016	Stra8-Cre;Upf2fl/Δ testis, RNA-seq	mouse testis	Upf2-null up with PTCs
Adamts10	ENSMUST00000173931	Bao et al. 2016	Stra8-Cre;Upf2fl/Δ testis, RNA-seq	mouse testis	Upf2-null up with PTCs
Adam23	ENSMUST00000141545	Bao et al. 2016	Stra8-Cre;Upf2fl/Δ testis, RNA-seq	mouse testis	Upf2-null up with PTCs
Adam10	ENSMUST00000140205	Bao et al. 2016	Stra8-Cre;Upf2fl/Δ testis, RNA-seq	mouse testis	Upf2-null up with PTCs
Adal	ENSMUST00000119031	Bao et al. 2016	Stra8-Cre;Upf2fl/Δ testis, RNA-seq	mouse testis	Upf2-null up with PTCs
Actr3b	ENSMUST00000128727	Bao et al. 2016	Stra8-Cre;Upf2fl/Δ testis, RNA-seq	mouse testis	Upf2-null up with PTCs
Acp6	ENSMUST00000090759	Bao et al. 2016	Stra8-Cre;Upf2fl/Δ testis, RNA-seq	mouse testis	Upf2-null up with PTCs
Acn9	ENSMUST00000123848	Bao et al. 2016	Stra8-Cre;Upf2fl/Δ testis, RNA-seq	mouse testis	Upf2-null up with PTCs
Acacb	ENSMUST00000102582	Bao et al. 2016	Stra8-Cre;Upf2fl/Δ testis, RNA-seq	mouse testis	Upf2-null up with PTCs
Acaa2	ENSMUST00000041053	Bao et al. 2016	Stra8-Cre;Upf2fl/Δ testis, RNA-seq	mouse testis	Upf2-null up with PTCs
Abi2	ENSMUST00000087417	Bao et al. 2016	Stra8-Cre;Upf2fl/Δ testis, RNA-seq	mouse testis	Upf2-null up with PTCs
Abcc1	ENSMUST00000100167	Bao et al. 2016	Stra8-Cre;Upf2fl/Δ testis, RNA-seq	mouse testis	Upf2-null up with PTCs
Abca3	ENSMUST00000039013	Bao et al. 2016	Stra8-Cre;Upf2fl/Δ testis, RNA-seq	mouse testis	Upf2-null up with PTCs
Aagab	ENSMUST00000041551	Bao et al. 2016	Stra8-Cre;Upf2fl/Δ testis, RNA-seq	mouse testis	Upf2-null up with PTCs
A430107O13Rik	ENSMUST00000115383	Bao et al. 2016	Stra8-Cre;Upf2fl/Δ testis, RNA-seq	mouse testis	Upf2-null up with PTCs
A230046K03Rik	ENSMUST00000038388	Bao et al. 2016	Stra8-Cre;Upf2fl/Δ testis, RNA-seq	mouse testis	Upf2-null up with PTCs
8430410A17Rik	ENSMUST00000032141	Bao et al. 2016	Stra8-Cre;Upf2fl/Δ testis, RNA-seq	mouse testis	Upf2-null up with PTCs
8030474K03Rik	ENSMUST00000149761	Bao et al. 2016	Stra8-Cre;Upf2fl/Δ testis, RNA-seq	mouse testis	Upf2-null up with PTCs
5430411K18Rik	ENSMUST00000044622	Bao et al. 2016	Stra8-Cre;Upf2fl/Δ testis, RNA-seq	mouse testis	Upf2-null up with PTCs
4930422G04Rik	ENSMUST00000043108	Bao et al. 2016	Stra8-Cre;Upf2fl/Δ testis, RNA-seq	mouse testis	Upf2-null up with PTCs
3200002M19Rik	ENSMUST00000144207	Bao et al. 2016	Stra8-Cre;Upf2fl/Δ testis, RNA-seq	mouse testis	Upf2-null up with PTCs
3110002H16Rik	ENSMUST00000025276	Bao et al. 2016	Stra8-Cre;Upf2fl/Δ testis, RNA-seq	mouse testis	Upf2-null up with PTCs
2810407C02Rik	ENSMUST00000107924	Bao et al. 2016	Stra8-Cre;Upf2fl/Δ testis, RNA-seq	mouse testis	Upf2-null up with PTCs
2810403A07Rik	ENSMUST00000029696	Bao et al. 2016	Stra8-Cre;Upf2fl/Δ testis, RNA-seq	mouse testis	Upf2-null up with PTCs
2610203C20Rik	ENSMUST00000098868	Bao et al. 2016	Stra8-Cre;Upf2fl/Δ testis, RNA-seq	mouse testis	Upf2-null up with PTCs
2610029G23Rik	ENSMUST00000033577	Bao et al. 2016	Stra8-Cre;Upf2fl/Δ testis, RNA-seq	mouse testis	Upf2-null up with PTCs
2310035C23Rik	ENSMUST00000086721	Bao et al. 2016	Stra8-Cre;Upf2fl/Δ testis, RNA-seq	mouse testis	Upf2-null up with PTCs
2310003L22Rik	ENSMUST00000028863	Bao et al. 2016	Stra8-Cre;Upf2fl/Δ testis, RNA-seq	mouse testis	Upf2-null up with PTCs
2210009G21Rik	ENSMUST00000141463	Bao et al. 2016	Stra8-Cre;Upf2fl/Δ testis, RNA-seq	mouse testis	Upf2-null up with PTCs
1810027O10Rik	ENSMUST00000133967	Bao et al. 2016	Stra8-Cre;Upf2fl/Δ testis, RNA-seq	mouse testis	Upf2-null up with PTCs
1700024P16Rik	ENSMUST00000167865	Bao et al. 2016	Stra8-Cre;Upf2fl/Δ testis, RNA-seq	mouse testis	Upf2-null up with PTCs
1500012F01Rik	ENSMUST00000125841	Bao et al. 2016	Stra8-Cre;Upf2fl/Δ testis, RNA-seq	mouse testis	Upf2-null up with PTCs
1500009L16Rik	ENSMUST00000150459	Bao et al. 2016	Stra8-Cre;Upf2fl/Δ testis, RNA-seq	mouse testis	Upf2-null up with PTCs
1190005F20Rik	ENSMUST00000065625	Bao et al. 2016	Stra8-Cre;Upf2fl/Δ testis, RNA-seq	mouse testis	Upf2-null up with PTCs
1110037F02Rik	ENSMUST00000108307	Bao et al. 2016	Stra8-Cre;Upf2fl/Δ testis, RNA-seq	mouse testis	Upf2-null up with PTCs
1110021L09Rik	ENSMUST00000119597	Bao et al. 2016	Stra8-Cre;Upf2fl/Δ testis, RNA-seq	mouse testis	Upf2-null up with PTCs
0610007C21Rik	ENSMUST00000130250	Bao et al. 2016	Stra8-Cre;Upf2fl/Δ testis, RNA-seq	mouse testis	Upf2-null up with PTCs
Sept9	ENSMUST00000093907	Bao et al. 2016	Stra8-Cre;Upf2fl/Δ testis, RNA-seq	mouse testis	Upf2-null up with PTCs
Sept8	ENSMUST00000117061	Bao et al. 2016	Stra8-Cre;Upf2fl/Δ testis, RNA-seq	mouse testis	Upf2-null up with PTCs
Zyx	ENSMUSG00000029860	McIlwain et al. 2010	RNA-seq	mouse E8.5 Smg1-null MEFs	alter splicing
Sfrs10	ENSMUSG00000034120	McIlwain et al. 2010	RNA-seq	mouse E8.5 Smg1-null MEFs	alter splicing
Alkbh3	ENSMUSG00000040174	McIlwain et al. 2010	RNA-seq	mouse E8.5 Smg1-null MEFs	alter splicing
Hnrnpa2b1	ENSMUSG00000004980	McIlwain et al. 2010	RNA-seq	mouse E8.5 Smg1-null MEFs	alter splicing
Tmem183a	ENSMUSG00000042305	McIlwain et al. 2010	RNA-seq	mouse E8.5 Smg1-null MEFs	alter splicing
Flot1	ENSMUSG00000059714	McIlwain et al. 2010	RNA-seq	mouse E8.5 Smg1-null MEFs	alter splicing
Nktr	ENSMUSG00000032525	McIlwain et al. 2010	RNA-seq	mouse E8.5 Smg1-null MEFs	alter splicing
Mgea5	ENSMUSG00000025220	McIlwain et al. 2010	RNA-seq	mouse E8.5 Smg1-null MEFs	alter splicing
Gtf2f2	ENSMUSG00000067995	McIlwain et al. 2010	RNA-seq	mouse E8.5 Smg1-null MEFs	alter splicing
Srrm1	ENSMUSG00000028809	McIlwain et al. 2010	RNA-seq	mouse E8.5 Smg1-null MEFs	alter splicing
Gls	ENSMUSG00000026103	McIlwain et al. 2010	RNA-seq	mouse E8.5 Smg1-null MEFs	alter splicing
U2af1	ENSMUSG00000061613	McIlwain et al. 2010	RNA-seq	mouse E8.5 Smg1-null MEFs	alter splicing
Hnrnph1	ENSMUSG00000007850	McIlwain et al. 2010	RNA-seq	mouse E8.5 Smg1-null MEFs	alter splicing
Rnf149	ENSMUSG00000048234	McIlwain et al. 2010	RNA-seq	mouse E8.5 Smg1-null MEFs	alter splicing
Nbr1	ENSMUSG00000017119	McIlwain et al. 2010	RNA-seq	mouse E8.5 Smg1-null MEFs	alter splicing
Sf3b1	ENSMUSG00000025982	McIlwain et al. 2010	RNA-seq	mouse E8.5 Smg1-null MEFs	alter splicing
Trim24	ENSMUSG00000029833	McIlwain et al. 2010	RNA-seq	mouse E8.5 Smg1-null MEFs	alter splicing
1810055E12Rik	ENSMUSG00000024993	McIlwain et al. 2010	RNA-seq	mouse E8.5 Smg1-null MEFs	alter splicing
Tatdn1	ENSMUSG00000050891	McIlwain et al. 2010	RNA-seq	mouse E8.5 Smg1-null MEFs	alter splicing
Sf3b3	ENSMUSG00000033732	McIlwain et al. 2010	RNA-seq	mouse E8.5 Smg1-null MEFs	alter splicing
Snx13	ENSMUSG00000020590	McIlwain et al. 2010	RNA-seq	mouse E8.5 Smg1-null MEFs	alter splicing
Wdfy2	ENSMUSG00000014547	McIlwain et al. 2010	RNA-seq	mouse E8.5 Smg1-null MEFs	alter splicing
Rbm5	ENSMUSG00000032580	McIlwain et al. 2010	RNA-seq	mouse E8.5 Smg1-null MEFs	alter splicing
Cask	ENSMUSG00000031012	McIlwain et al. 2010	RNA-seq	mouse E8.5 Smg1-null MEFs	alter splicing
Slc38a2	ENSMUSG00000022462	McIlwain et al. 2010	RNA-seq	mouse E8.5 Smg1-null MEFs	alter splicing
Camk2g	ENSMUSG00000021820	McIlwain et al. 2010	RNA-seq	mouse E8.5 Smg1-null MEFs	alter splicing
Acbd5	ENSMUSG00000026781	McIlwain et al. 2010	RNA-seq	mouse E8.5 Smg1-null MEFs	alter splicing
Flot2	ENSMUSG00000061981	McIlwain et al. 2010	RNA-seq	mouse E8.5 Smg1-null MEFs	alter splicing
Ccar1	ENSMUSG00000020074	McIlwain et al. 2010	RNA-seq	mouse E8.5 Smg1-null MEFs	alter splicing
Bat3	ENSMUSG00000024392	McIlwain et al. 2010	RNA-seq	mouse E8.5 Smg1-null MEFs	alter splicing
Pigq	ENSMUSG00000025728	McIlwain et al. 2010	RNA-seq	mouse E8.5 Smg1-null MEFs	alter splicing
Hnrpdl	ENSMUSG00000029328	McIlwain et al. 2010	RNA-seq	mouse E8.5 Smg1-null MEFs	alter splicing
Sf1	ENSMUSG00000026751	McIlwain et al. 2010	RNA-seq	mouse E8.5 Smg1-null MEFs	alter splicing
Sfrs11	ENSMUSG00000055436	McIlwain et al. 2010	RNA-seq	mouse E8.5 Smg1-null MEFs	alter splicing
Snx17	ENSMUSG00000029146	McIlwain et al. 2010	RNA-seq	mouse E8.5 Smg1-null MEFs	alter splicing
Ccnl1	ENSMUSG00000027829	McIlwain et al. 2010	RNA-seq	mouse E8.5 Smg1-null MEFs	alter splicing
Safb2	ENSMUSG00000071054	McIlwain et al. 2010	RNA-seq	mouse E8.5 Smg1-null MEFs	alter splicing
Chpf	ENSMUSG00000032997	McIlwain et al. 2010	RNA-seq	mouse E8.5 Smg1-null MEFs	alter splicing
Pdia5	ENSMUSG00000022844	McIlwain et al. 2010	RNA-seq	mouse E8.5 Smg1-null MEFs	alter splicing
Abhd5	ENSMUSG00000032540	McIlwain et al. 2010	RNA-seq	mouse E8.5 Smg1-null MEFs	alter splicing
Dnajc5	ENSMUSG00000000826	McIlwain et al. 2010	RNA-seq	mouse E8.5 Smg1-null MEFs	alter splicing
Sec61a2	ENSMUSG00000025816	McIlwain et al. 2010	RNA-seq	mouse E8.5 Smg1-null MEFs	alter splicing
Slc37a3	ENSMUSG00000029924	McIlwain et al. 2010	RNA-seq	mouse E8.5 Smg1-null MEFs	alter splicing
Cnot2	ENSMUSG00000020166	McIlwain et al. 2010	RNA-seq	mouse E8.5 Smg1-null MEFs	alter splicing
Bclaf1	ENSMUSG00000037608	McIlwain et al. 2010	RNA-seq	mouse E8.5 Smg1-null MEFs	alter splicing
Ubqln1	ENSMUSG00000005312	McIlwain et al. 2010	RNA-seq	mouse E8.5 Smg1-null MEFs	alter splicing
Ppp4r1	ENSMUSG00000061950	McIlwain et al. 2010	RNA-seq	mouse E8.5 Smg1-null MEFs	alter splicing
Usp16	ENSMUSG00000025616	McIlwain et al. 2010	RNA-seq	mouse E8.5 Smg1-null MEFs	alter splicing
Nup35	ENSMUSG00000026999	McIlwain et al. 2010	RNA-seq	mouse E8.5 Smg1-null MEFs	alter splicing
Hspa13	ENSMUSG00000032932	McIlwain et al. 2010	RNA-seq	mouse E8.5 Smg1-null MEFs	alter splicing
Trp53bp1	ENSMUSG00000043909	McIlwain et al. 2010	RNA-seq	mouse E8.5 Smg1-null MEFs	alter splicing
Rexo4	ENSMUSG00000052406	McIlwain et al. 2010	RNA-seq	mouse E8.5 Smg1-null MEFs	alter splicing
l7Rn6	ENSMUSG00000062797	McIlwain et al. 2010	RNA-seq	mouse E8.5 Smg1-null MEFs	alter splicing
Spg7	ENSMUSG00000000738	McIlwain et al. 2010	RNA-seq	mouse E8.5 Smg1-null MEFs	alter splicing
AA536717	ENSMUSG00000039599	McIlwain et al. 2010	RNA-seq	mouse E8.5 Smg1-null MEFs	alter splicing
2610204M08Rik	ENSMUSG00000037679	McIlwain et al. 2010	RNA-seq	mouse E8.5 Smg1-null MEFs	alter splicing
Maz	ENSMUSG00000030678	McIlwain et al. 2010	RNA-seq	mouse E8.5 Smg1-null MEFs	alter splicing
Golph3l	ENSMUSG00000046519	McIlwain et al. 2010	RNA-seq	mouse E8.5 Smg1-null MEFs	alter splicing
Tgds	ENSMUSG00000022130	McIlwain et al. 2010	RNA-seq	mouse E8.5 Smg1-null MEFs	alter splicing
Exosc10	ENSMUSG00000017264	McIlwain et al. 2010	RNA-seq	mouse E8.5 Smg1-null MEFs	alter splicing
Sat1	ENSMUSG00000025283	McIlwain et al. 2010	RNA-seq	mouse E8.5 Smg1-null MEFs	alter splicing
Eif4a2	ENSMUSG00000022884	McIlwain et al. 2010	RNA-seq	mouse E8.5 Smg1-null MEFs	alter splicing
Rnf14	ENSMUSG00000060450	McIlwain et al. 2010	RNA-seq	mouse E8.5 Smg1-null MEFs	alter splicing
Snrpa1	ENSMUSG00000030512	McIlwain et al. 2010	RNA-seq	mouse E8.5 Smg1-null MEFs	alter splicing
Rnf114	ENSMUSG00000006418	McIlwain et al. 2010	RNA-seq	mouse E8.5 Smg1-null MEFs	alter splicing
Ptbp1	ENSMUSG00000006498	McIlwain et al. 2010	RNA-seq	mouse E8.5 Smg1-null MEFs	alter splicing
Hnrpll	ENSMUSG00000024095	McIlwain et al. 2010	RNA-seq	mouse E8.5 Smg1-null MEFs	alter splicing
Acaa1a	ENSMUSG00000036138	McIlwain et al. 2010	RNA-seq	mouse E8.5 Smg1-null MEFs	alter splicing
Zfp410	ENSMUSG00000042472	McIlwain et al. 2010	RNA-seq	mouse E8.5 Smg1-null MEFs	alter splicing
Lgtn	ENSMUSG00000026427	McIlwain et al. 2010	RNA-seq	mouse E8.5 Smg1-null MEFs	alter splicing
Ptpn2	ENSMUSG00000024539	McIlwain et al. 2010	RNA-seq	mouse E8.5 Smg1-null MEFs	alter splicing
Sfrs2	ENSMUSG00000034120	McIlwain et al. 2010	RNA-seq	mouse E8.5 Smg1-null MEFs	alter splicing
Timp1	ENSMUSG00000001131	McIlwain et al. 2010	RNA-seq	mouse E8.5 Smg1-null MEFs	alter splicing
Acaa1b	ENSMUSG00000036138	McIlwain et al. 2010	RNA-seq	mouse E8.5 Smg1-null MEFs	alter splicing
Parl	ENSMUSG00000033918	McIlwain et al. 2010	RNA-seq	mouse E8.5 Smg1-null MEFs	alter splicing
Zfp346	ENSMUSG00000021481	McIlwain et al. 2010	RNA-seq	mouse E8.5 Smg1-null MEFs	alter splicing
Prkab1	ENSMUSG00000029513	McIlwain et al. 2010	RNA-seq	mouse E8.5 Smg1-null MEFs	alter splicing
Supt4h1	ENSMUSG00000020485	McIlwain et al. 2010	RNA-seq	mouse E8.5 Smg1-null MEFs	alter splicing
Ddx39	ENSMUSG00000005481	McIlwain et al. 2010	RNA-seq	mouse E8.5 Smg1-null MEFs	alter splicing
Rsrc1	ENSMUSG00000034544	McIlwain et al. 2010	RNA-seq	mouse E8.5 Smg1-null MEFs	alter splicing
Dhx9	ENSMUSG00000042699	McIlwain et al. 2010	RNA-seq	mouse E8.5 Smg1-null MEFs	alter splicing
Senp6	ENSMUSG00000034252	McIlwain et al. 2010	RNA-seq	mouse E8.5 Smg1-null MEFs	alter splicing
Xrn2	ENSMUSG00000027433	McIlwain et al. 2010	RNA-seq	mouse E8.5 Smg1-null MEFs	alter splicing
Zc3h14	ENSMUSG00000021012	McIlwain et al. 2010	RNA-seq	mouse E8.5 Smg1-null MEFs	alter splicing
Ewsr1	ENSMUSG00000009079	McIlwain et al. 2010	RNA-seq	mouse E8.5 Smg1-null MEFs	alter splicing
Spag9	ENSMUSG00000020859	McIlwain et al. 2010	RNA-seq	mouse E8.5 Smg1-null MEFs	alter splicing
Dlg1	ENSMUSG00000022770	McIlwain et al. 2010	RNA-seq	mouse E8.5 Smg1-null MEFs	alter splicing
Pdlim7	ENSMUSG00000021493	McIlwain et al. 2010	RNA-seq	mouse E8.5 Smg1-null MEFs	alter splicing
Riok1	ENSMUSG00000021428	McIlwain et al. 2010	RNA-seq	mouse E8.5 Smg1-null MEFs	alter splicing
Crls1	ENSMUSG00000027357	McIlwain et al. 2010	RNA-seq	mouse E8.5 Smg1-null MEFs	alter splicing
Bptf	ENSMUSG00000040481	McIlwain et al. 2010	RNA-seq	mouse E8.5 Smg1-null MEFs	alter splicing
Jmjd1a	ENSMUSG00000053470	McIlwain et al. 2010	RNA-seq	mouse E8.5 Smg1-null MEFs	alter splicing
Ube2h	ENSMUSG00000039159	McIlwain et al. 2010	RNA-seq	mouse E8.5 Smg1-null MEFs	alter splicing
Gria3	ENSMUSG00000001986	McIlwain et al. 2010	RNA-seq	mouse E8.5 Smg1-null MEFs	alter splicing
4933407N01Rik	ENSMUSG00000020311	McIlwain et al. 2010	RNA-seq	mouse E8.5 Smg1-null MEFs	alter splicing
Mtx1	ENSMUSG00000064068	McIlwain et al. 2010	RNA-seq	mouse E8.5 Smg1-null MEFs	alter splicing
Nfyb	ENSMUSG00000020248	McIlwain et al. 2010	RNA-seq	mouse E8.5 Smg1-null MEFs	alter splicing
Rps9	ENSMUSG00000006333	McIlwain et al. 2010	RNA-seq	mouse E8.5 Smg1-null MEFs	alter splicing
Golga4	ENSMUSG00000038708	McIlwain et al. 2010	RNA-seq	mouse E8.5 Smg1-null MEFs	alter splicing
Wbscr22	ENSMUSG00000005378	McIlwain et al. 2010	RNA-seq	mouse E8.5 Smg1-null MEFs	alter splicing
Topbp1	ENSMUSG00000032555	McIlwain et al. 2010	RNA-seq	mouse E8.5 Smg1-null MEFs	alter splicing
Gak	ENSMUSG00000062234	McIlwain et al. 2010	RNA-seq	mouse E8.5 Smg1-null MEFs	alter splicing
Pum1	ENSMUSG00000028580	McIlwain et al. 2010	RNA-seq	mouse E8.5 Smg1-null MEFs	alter splicing
Rnps1	ENSMUSG00000034681	McIlwain et al. 2010	RNA-seq	mouse E8.5 Smg1-null MEFs	alter splicing
Brd2	ENSMUSG00000024335	McIlwain et al. 2010	RNA-seq	mouse E8.5 Smg1-null MEFs	alter splicing
Hexa	ENSMUSG00000025232	McIlwain et al. 2010	RNA-seq	mouse E8.5 Smg1-null MEFs	alter splicing
Slc6a6	ENSMUSG00000030096	McIlwain et al. 2010	RNA-seq	mouse E8.5 Smg1-null MEFs	alter splicing
Mgrn1	ENSMUSG00000022517	McIlwain et al. 2010	RNA-seq	mouse E8.5 Smg1-null MEFs	alter splicing
Usp7	ENSMUSG00000022710	McIlwain et al. 2010	RNA-seq	mouse E8.5 Smg1-null MEFs	alter splicing
Becn1	ENSMUSG00000035086	McIlwain et al. 2010	RNA-seq	mouse E8.5 Smg1-null MEFs	alter splicing
Klf6	ENSMUSG00000000078	McIlwain et al. 2010	RNA-seq	mouse E8.5 Smg1-null MEFs	alter splicing
Mtmr10	ENSMUSG00000030522	McIlwain et al. 2010	RNA-seq	mouse E8.5 Smg1-null MEFs	alter splicing
Ubp1	ENSMUSG00000009741	McIlwain et al. 2010	RNA-seq	mouse E8.5 Smg1-null MEFs	alter splicing
Wsb1	ENSMUSG00000017677	McIlwain et al. 2010	RNA-seq	mouse E8.5 Smg1-null MEFs	alter splicing
Zmiz2	ENSMUSG00000041164	McIlwain et al. 2010	RNA-seq	mouse E8.5 Smg1-null MEFs	alter splicing
Sgce	ENSMUSG00000004631	McIlwain et al. 2010	RNA-seq	mouse E8.5 Smg1-null MEFs	alter splicing
Pcolce	ENSMUSG00000029718	McIlwain et al. 2010	RNA-seq	mouse E8.5 Smg1-null MEFs	alter splicing
Chordc1	ENSMUSG00000001774	McIlwain et al. 2010	RNA-seq	mouse E8.5 Smg1-null MEFs	alter splicing
2610101N10Rik	ENSMUSG00000032407	McIlwain et al. 2010	RNA-seq	mouse E8.5 Smg1-null MEFs	alter splicing
2310037I24Rik	ENSMUSG00000022992	McIlwain et al. 2010	RNA-seq	mouse E8.5 Smg1-null MEFs	alter splicing
Zfand5	ENSMUSG00000024750	McIlwain et al. 2010	RNA-seq	mouse E8.5 Smg1-null MEFs	alter splicing
Arid4b	ENSMUSG00000039219	McIlwain et al. 2010	RNA-seq	mouse E8.5 Smg1-null MEFs	alter splicing
Setd2	ENSMUSG00000044791	McIlwain et al. 2010	RNA-seq	mouse E8.5 Smg1-null MEFs	alter splicing
Ube2k	ENSMUSG00000029203	McIlwain et al. 2010	RNA-seq	mouse E8.5 Smg1-null MEFs	alter splicing
Brms1l	ENSMUSG00000012076	McIlwain et al. 2010	RNA-seq	mouse E8.5 Smg1-null MEFs	alter splicing
Uhrf1bp1l	ENSMUSG00000019951	McIlwain et al. 2010	RNA-seq	mouse E8.5 Smg1-null MEFs	alter splicing
Ppp4r2	ENSMUSG00000052144	McIlwain et al. 2010	RNA-seq	mouse E8.5 Smg1-null MEFs	alter splicing
Pcm1	ENSMUSG00000024561	McIlwain et al. 2010	RNA-seq	mouse E8.5 Smg1-null MEFs	alter splicing
Stx16	ENSMUSG00000027522	McIlwain et al. 2010	RNA-seq	mouse E8.5 Smg1-null MEFs	alter splicing
Chm	ENSMUSG00000025531	McIlwain et al. 2010	RNA-seq	mouse E8.5 Smg1-null MEFs	alter splicing
AU022870	ENSMUSG00000029617	McIlwain et al. 2010	RNA-seq	mouse E8.5 Smg1-null MEFs	alter splicing
3110002H16Rik	ENSMUSG00000024410	McIlwain et al. 2010	RNA-seq	mouse E8.5 Smg1-null MEFs	alter splicing
D4Ertd22e	ENSMUSG00000040842	McIlwain et al. 2010	RNA-seq	mouse E8.5 Smg1-null MEFs	alter splicing
Atg3	ENSMUSG00000022663	McIlwain et al. 2010	RNA-seq	mouse E8.5 Smg1-null MEFs	alter splicing
Riok3	ENSMUSG00000024404	McIlwain et al. 2010	RNA-seq	mouse E8.5 Smg1-null MEFs	alter splicing
Prkaa1	ENSMUSG00000050697	McIlwain et al. 2010	RNA-seq	mouse E8.5 Smg1-null MEFs	alter splicing
Pkp4	ENSMUSG00000026991	McIlwain et al. 2010	RNA-seq	mouse E8.5 Smg1-null MEFs	alter splicing
Ibtk	ENSMUSG00000035941	McIlwain et al. 2010	RNA-seq	mouse E8.5 Smg1-null MEFs	alter splicing
Kcmf1	ENSMUSG00000056698	McIlwain et al. 2010	RNA-seq	mouse E8.5 Smg1-null MEFs	alter splicing
Ercc3	ENSMUSG00000024382	McIlwain et al. 2010	RNA-seq	mouse E8.5 Smg1-null MEFs	alter splicing
Usp32	ENSMUSG00000000804	McIlwain et al. 2010	RNA-seq	mouse E8.5 Smg1-null MEFs	alter splicing
Clk1	ENSMUSG00000026034	McIlwain et al. 2010	RNA-seq	mouse E8.5 Smg1-null MEFs	alter splicing
Ccdc100	ENSMUSG00000048799	McIlwain et al. 2010	RNA-seq	mouse E8.5 Smg1-null MEFs	alter splicing
C030004A17Rik	ENSMUSG00000050471	McIlwain et al. 2010	RNA-seq	mouse E8.5 Smg1-null MEFs	alter splicing
Hnrnpd	ENSMUSG00000000568	McIlwain et al. 2010	RNA-seq	mouse E8.5 Smg1-null MEFs	alter splicing
Sfrs7	ENSMUSG00000024097	McIlwain et al. 2010	RNA-seq	mouse E8.5 Smg1-null MEFs	alter splicing
Ipo9	ENSMUSG00000041879	McIlwain et al. 2010	RNA-seq	mouse E8.5 Smg1-null MEFs	alter splicing
Slc25a24	ENSMUSG00000040322	McIlwain et al. 2010	RNA-seq	mouse E8.5 Smg1-null MEFs	alter splicing
Cops4	ENSMUSG00000035297	McIlwain et al. 2010	RNA-seq	mouse E8.5 Smg1-null MEFs	alter splicing
Pik3c2a	ENSMUSG00000030660	McIlwain et al. 2010	RNA-seq	mouse E8.5 Smg1-null MEFs	alter splicing
Zmiz1	ENSMUSG00000007817	McIlwain et al. 2010	RNA-seq	mouse E8.5 Smg1-null MEFs	alter splicing
Tbc1d9b	ENSMUSG00000036644	McIlwain et al. 2010	RNA-seq	mouse E8.5 Smg1-null MEFs	alter splicing
Eya3	ENSMUSG00000028886	McIlwain et al. 2010	RNA-seq	mouse E8.5 Smg1-null MEFs	alter splicing
Clpb	ENSMUSG00000001829	McIlwain et al. 2010	RNA-seq	mouse E8.5 Smg1-null MEFs	alter splicing
Strn3	ENSMUSG00000020954	McIlwain et al. 2010	RNA-seq	mouse E8.5 Smg1-null MEFs	alter splicing
Rcbtb2	ENSMUSG00000022106	McIlwain et al. 2010	RNA-seq	mouse E8.5 Smg1-null MEFs	alter splicing
Rsl1d1	ENSMUSG00000005846	McIlwain et al. 2010	RNA-seq	mouse E8.5 Smg1-null MEFs	alter splicing
Sfrs2ip	ENSMUSG00000033228	McIlwain et al. 2010	RNA-seq	mouse E8.5 Smg1-null MEFs	alter splicing
Xpnpep1	ENSMUSG00000025027	McIlwain et al. 2010	RNA-seq	mouse E8.5 Smg1-null MEFs	alter splicing
Herc4	ENSMUSG00000020064	McIlwain et al. 2010	RNA-seq	mouse E8.5 Smg1-null MEFs	alter splicing
Snrpb	ENSMUSG00000027404	McIlwain et al. 2010	RNA-seq	mouse E8.5 Smg1-null MEFs	alter splicing
Numa1	ENSMUSG00000066306	McIlwain et al. 2010	RNA-seq	mouse E8.5 Smg1-null MEFs	alter splicing
Pkn1	ENSMUSG00000057672	McIlwain et al. 2010	RNA-seq	mouse E8.5 Smg1-null MEFs	alter splicing
Lancl1	ENSMUSG00000026000	McIlwain et al. 2010	RNA-seq	mouse E8.5 Smg1-null MEFs	alter splicing
Jmjd1b	ENSMUSG00000038773	McIlwain et al. 2010	RNA-seq	mouse E8.5 Smg1-null MEFs	alter splicing
Vps24	ENSMUSG00000053119	McIlwain et al. 2010	RNA-seq	mouse E8.5 Smg1-null MEFs	alter splicing
Adss	ENSMUSG00000015961	McIlwain et al. 2010	RNA-seq	mouse E8.5 Smg1-null MEFs	alter splicing
Tprgl	ENSMUSG00000029030	McIlwain et al. 2010	RNA-seq	mouse E8.5 Smg1-null MEFs	alter splicing
Fkbp7	ENSMUSG00000002732	McIlwain et al. 2010	RNA-seq	mouse E8.5 Smg1-null MEFs	alter splicing
Snapc3	ENSMUSG00000028483	McIlwain et al. 2010	RNA-seq	mouse E8.5 Smg1-null MEFs	alter splicing
Ppa2	ENSMUSG00000020089	McIlwain et al. 2010	RNA-seq	mouse E8.5 Smg1-null MEFs	alter splicing
Chchd3	ENSMUSG00000053768	McIlwain et al. 2010	RNA-seq	mouse E8.5 Smg1-null MEFs	alter splicing
Snrp70	ENSMUSG00000063511	McIlwain et al. 2010	RNA-seq	mouse E8.5 Smg1-null MEFs	alter splicing
Hbs1l	ENSMUSG00000019977	McIlwain et al. 2010	RNA-seq	mouse E8.5 Smg1-null MEFs	alter splicing
1190005P17Rik	ENSMUSG00000020224	McIlwain et al. 2010	RNA-seq	mouse E8.5 Smg1-null MEFs	alter splicing
Exoc2	ENSMUSG00000021357	McIlwain et al. 2010	RNA-seq	mouse E8.5 Smg1-null MEFs	alter splicing
2410127E18Rik	ENSMUSG00000029775	McIlwain et al. 2010	RNA-seq	mouse E8.5 Smg1-null MEFs	alter splicing
Bub3	ENSMUSG00000066979	McIlwain et al. 2010	RNA-seq	mouse E8.5 Smg1-null MEFs	alter splicing
Zcchc17	ENSMUSG00000028772	McIlwain et al. 2010	RNA-seq	mouse E8.5 Smg1-null MEFs	alter splicing
Snx14	ENSMUSG00000032422	McIlwain et al. 2010	RNA-seq	mouse E8.5 Smg1-null MEFs	alter splicing
Alcam	ENSMUSG00000022636	McIlwain et al. 2010	RNA-seq	mouse E8.5 Smg1-null MEFs	alter splicing
Smarcad1	ENSMUSG00000029920	McIlwain et al. 2010	RNA-seq	mouse E8.5 Smg1-null MEFs	alter splicing
Suds3	ENSMUSG00000066900	McIlwain et al. 2010	RNA-seq	mouse E8.5 Smg1-null MEFs	alter splicing
Fgfr1	ENSMUSG00000031565	McIlwain et al. 2010	RNA-seq	mouse E8.5 Smg1-null MEFs	alter splicing
Rab22a	ENSMUSG00000027519	McIlwain et al. 2010	RNA-seq	mouse E8.5 Smg1-null MEFs	alter splicing
Gnl2	ENSMUSG00000028869	McIlwain et al. 2010	RNA-seq	mouse E8.5 Smg1-null MEFs	alter splicing
Psmf1	ENSMUSG00000032869	McIlwain et al. 2010	RNA-seq	mouse E8.5 Smg1-null MEFs	alter splicing
2500003M10Rik	ENSMUSG00000001017	McIlwain et al. 2010	RNA-seq	mouse E8.5 Smg1-null MEFs	alter splicing
Rnf41	ENSMUSG00000025373	McIlwain et al. 2010	RNA-seq	mouse E8.5 Smg1-null MEFs	alter splicing
Tom1	ENSMUSG00000042870	McIlwain et al. 2010	RNA-seq	mouse E8.5 Smg1-null MEFs	alter splicing
Ttc3	ENSMUSG00000040785	McIlwain et al. 2010	RNA-seq	mouse E8.5 Smg1-null MEFs	alter splicing
Nt5c3	ENSMUSG00000029780	McIlwain et al. 2010	RNA-seq	mouse E8.5 Smg1-null MEFs	alter splicing
Lyar	ENSMUSG00000067367	McIlwain et al. 2010	RNA-seq	mouse E8.5 Smg1-null MEFs	alter splicing
Farsb	ENSMUSG00000026245	McIlwain et al. 2010	RNA-seq	mouse E8.5 Smg1-null MEFs	alter splicing
Oxsr1	ENSMUSG00000036737	McIlwain et al. 2010	RNA-seq	mouse E8.5 Smg1-null MEFs	alter splicing
Cpsf6	ENSMUSG00000055531	McIlwain et al. 2010	RNA-seq	mouse E8.5 Smg1-null MEFs	alter splicing
E430025E21Rik	ENSMUSG00000022350	McIlwain et al. 2010	RNA-seq	mouse E8.5 Smg1-null MEFs	alter splicing
Ulk1	ENSMUSG00000029512	McIlwain et al. 2010	RNA-seq	mouse E8.5 Smg1-null MEFs	alter splicing
Tcf12	ENSMUSG00000032228	McIlwain et al. 2010	RNA-seq	mouse E8.5 Smg1-null MEFs	alter splicing
Mrpl13	ENSMUSG00000022370	McIlwain et al. 2010	RNA-seq	mouse E8.5 Smg1-null MEFs	alter splicing
2310021P13Rik	ENSMUSG00000021819	McIlwain et al. 2010	RNA-seq	mouse E8.5 Smg1-null MEFs	alter splicing
Cflar	ENSMUSG00000026031	McIlwain et al. 2010	RNA-seq	mouse E8.5 Smg1-null MEFs	alter splicing
Rnf10	ENSMUSG00000041740	McIlwain et al. 2010	RNA-seq	mouse E8.5 Smg1-null MEFs	alter splicing
Mtdh	ENSMUSG00000022255	McIlwain et al. 2010	RNA-seq	mouse E8.5 Smg1-null MEFs	alter splicing
Hsf1	ENSMUSG00000022556	McIlwain et al. 2010	RNA-seq	mouse E8.5 Smg1-null MEFs	alter splicing
Ddx42	ENSMUSG00000020705	McIlwain et al. 2010	RNA-seq	mouse E8.5 Smg1-null MEFs	alter splicing
March_5		McIlwain et al. 2010	RNA-seq	mouse E8.5 Smg1-null MEFs	alter splicing
Yipf3	ENSMUSG00000071074	McIlwain et al. 2010	RNA-seq	mouse E8.5 Smg1-null MEFs	alter splicing
Hnrnpk	ENSMUSG00000021546	McIlwain et al. 2010	RNA-seq	mouse E8.5 Smg1-null MEFs	alter splicing
Tmem55a	ENSMUSG00000028221	McIlwain et al. 2010	RNA-seq	mouse E8.5 Smg1-null MEFs	alter splicing
Pigs	ENSMUSG00000041958	McIlwain et al. 2010	RNA-seq	mouse E8.5 Smg1-null MEFs	alter splicing
BC027231	ENSMUSG00000036208	McIlwain et al. 2010	RNA-seq	mouse E8.5 Smg1-null MEFs	alter splicing
1300010M03Rik	ENSMUSG00000017802	McIlwain et al. 2010	RNA-seq	mouse E8.5 Smg1-null MEFs	alter splicing
Wdr26	ENSMUSG00000038733	McIlwain et al. 2010	RNA-seq	mouse E8.5 Smg1-null MEFs	alter splicing
Trappc6b	ENSMUSG00000020993	McIlwain et al. 2010	RNA-seq	mouse E8.5 Smg1-null MEFs	alter splicing
Smc6	ENSMUSG00000020608	McIlwain et al. 2010	RNA-seq	mouse E8.5 Smg1-null MEFs	alter splicing
Snx4	ENSMUSG00000022808	McIlwain et al. 2010	RNA-seq	mouse E8.5 Smg1-null MEFs	alter splicing
Pmm2	ENSMUSG00000022474	McIlwain et al. 2010	RNA-seq	mouse E8.5 Smg1-null MEFs	alter splicing
Cog4	ENSMUSG00000031753	McIlwain et al. 2010	RNA-seq	mouse E8.5 Smg1-null MEFs	alter splicing
Tial1	ENSMUSG00000030846	McIlwain et al. 2010	RNA-seq	mouse E8.5 Smg1-null MEFs	alter splicing
Tfdp1	ENSMUSG00000038482	McIlwain et al. 2010	RNA-seq	mouse E8.5 Smg1-null MEFs	alter splicing
Stra13	ENSMUSG00000030103	McIlwain et al. 2010	RNA-seq	mouse E8.5 Smg1-null MEFs	alter splicing
Cd47	ENSMUSG00000055447	McIlwain et al. 2010	RNA-seq	mouse E8.5 Smg1-null MEFs	alter splicing
App	ENSMUSG00000022892	McIlwain et al. 2010	RNA-seq	mouse E8.5 Smg1-null MEFs	alter splicing
Ncam1	ENSMUSG00000039542	McIlwain et al. 2010	RNA-seq	mouse E8.5 Smg1-null MEFs	alter splicing
Cdc27	ENSMUSG00000020687	McIlwain et al. 2010	RNA-seq	mouse E8.5 Smg1-null MEFs	alter splicing
Arhgap17	ENSMUSG00000030766	McIlwain et al. 2010	RNA-seq	mouse E8.5 Smg1-null MEFs	alter splicing
2310035C23Rik	ENSMUSG00000026319	McIlwain et al. 2010	RNA-seq	mouse E8.5 Smg1-null MEFs	alter splicing
Xpo1	ENSMUSG00000020290	McIlwain et al. 2010	RNA-seq	mouse E8.5 Smg1-null MEFs	alter splicing
Tank	ENSMUSG00000064289	McIlwain et al. 2010	RNA-seq	mouse E8.5 Smg1-null MEFs	alter splicing
Prpf38b	ENSMUSG00000027881	McIlwain et al. 2010	RNA-seq	mouse E8.5 Smg1-null MEFs	alter splicing
Ube4b	ENSMUSG00000028960	McIlwain et al. 2010	RNA-seq	mouse E8.5 Smg1-null MEFs	alter splicing
Tsta3	ENSMUSG00000022570	McIlwain et al. 2010	RNA-seq	mouse E8.5 Smg1-null MEFs	alter splicing
Tmem209	ENSMUSG00000029782	McIlwain et al. 2010	RNA-seq	mouse E8.5 Smg1-null MEFs	alter splicing
Slc4a4	ENSMUSG00000060961	McIlwain et al. 2010	RNA-seq	mouse E8.5 Smg1-null MEFs	alter splicing
Cnpy3	ENSMUSG00000023973	McIlwain et al. 2010	RNA-seq	mouse E8.5 Smg1-null MEFs	alter splicing
Cnot1	ENSMUSG00000036550	McIlwain et al. 2010	RNA-seq	mouse E8.5 Smg1-null MEFs	alter splicing
Ap3m1	ENSMUSG00000021824	McIlwain et al. 2010	RNA-seq	mouse E8.5 Smg1-null MEFs	alter splicing
Uhrf2	ENSMUSG00000024817	McIlwain et al. 2010	RNA-seq	mouse E8.5 Smg1-null MEFs	alter splicing
Cdk5rap3	ENSMUSG00000018669	McIlwain et al. 2010	RNA-seq	mouse E8.5 Smg1-null MEFs	alter splicing
Stt3a	ENSMUSG00000032116	McIlwain et al. 2010	RNA-seq	mouse E8.5 Smg1-null MEFs	alter splicing
Ilf3	ENSMUSG00000032178	McIlwain et al. 2010	RNA-seq	mouse E8.5 Smg1-null MEFs	alter splicing
Rbm39	ENSMUSG00000027620	McIlwain et al. 2010	RNA-seq	mouse E8.5 Smg1-null MEFs	alter splicing
Uvrag	ENSMUSG00000035354	McIlwain et al. 2010	RNA-seq	mouse E8.5 Smg1-null MEFs	alter splicing
Zbtb8os	ENSMUSG00000057572	McIlwain et al. 2010	RNA-seq	mouse E8.5 Smg1-null MEFs	alter splicing
Polb	ENSMUSG00000031536	McIlwain et al. 2010	RNA-seq	mouse E8.5 Smg1-null MEFs	alter splicing
Azi2	ENSMUSG00000039285	McIlwain et al. 2010	RNA-seq	mouse E8.5 Smg1-null MEFs	alter splicing
Pcmt1	ENSMUSG00000019795	McIlwain et al. 2010	RNA-seq	mouse E8.5 Smg1-null MEFs	alter splicing
Znrf1	ENSMUSG00000033545	McIlwain et al. 2010	RNA-seq	mouse E8.5 Smg1-null MEFs	alter splicing
Cops7b	ENSMUSG00000026240	McIlwain et al. 2010	RNA-seq	mouse E8.5 Smg1-null MEFs	alter splicing
Bace1	ENSMUSG00000032086	McIlwain et al. 2010	RNA-seq	mouse E8.5 Smg1-null MEFs	alter splicing
Scrib	ENSMUSG00000022568	McIlwain et al. 2010	RNA-seq	mouse E8.5 Smg1-null MEFs	alter splicing
Wdr82	ENSMUSG00000020257	McIlwain et al. 2010	RNA-seq	mouse E8.5 Smg1-null MEFs	alter splicing
Sae1	ENSMUSG00000052833	McIlwain et al. 2010	RNA-seq	mouse E8.5 Smg1-null MEFs	alter splicing
Mkln1	ENSMUSG00000025609	McIlwain et al. 2010	RNA-seq	mouse E8.5 Smg1-null MEFs	alter splicing
Ube3b	ENSMUSG00000029577	McIlwain et al. 2010	RNA-seq	mouse E8.5 Smg1-null MEFs	alter splicing
Ptk2	ENSMUSG00000022607	McIlwain et al. 2010	RNA-seq	mouse E8.5 Smg1-null MEFs	alter splicing
Epha4	ENSMUSG00000026235	McIlwain et al. 2010	RNA-seq	mouse E8.5 Smg1-null MEFs	alter splicing
Uqcrc2	ENSMUSG00000030884	McIlwain et al. 2010	RNA-seq	mouse E8.5 Smg1-null MEFs	alter splicing
Hnrnpl	ENSMUSG00000006219	McIlwain et al. 2010	RNA-seq	mouse E8.5 Smg1-null MEFs	alter splicing
Ext2	ENSMUSG00000027198	McIlwain et al. 2010	RNA-seq	mouse E8.5 Smg1-null MEFs	alter splicing
Supt6h	ENSMUSG00000002052	McIlwain et al. 2010	RNA-seq	mouse E8.5 Smg1-null MEFs	alter splicing
Sidt2	ENSMUSG00000034908	McIlwain et al. 2010	RNA-seq	mouse E8.5 Smg1-null MEFs	alter splicing
Pdcd2l	ENSMUSG00000002635	McIlwain et al. 2010	RNA-seq	mouse E8.5 Smg1-null MEFs	alter splicing
Nol9	ENSMUSG00000028948	McIlwain et al. 2010	RNA-seq	mouse E8.5 Smg1-null MEFs	alter splicing
Mrpl48	ENSMUSG00000030706	McIlwain et al. 2010	RNA-seq	mouse E8.5 Smg1-null MEFs	alter splicing
Exoc5	ENSMUSG00000061244	McIlwain et al. 2010	RNA-seq	mouse E8.5 Smg1-null MEFs	alter splicing
Eif4g3	ENSMUSG00000028760	McIlwain et al. 2010	RNA-seq	mouse E8.5 Smg1-null MEFs	alter splicing
Cdk5	ENSMUSG00000028969	McIlwain et al. 2010	RNA-seq	mouse E8.5 Smg1-null MEFs	alter splicing
Brap	ENSMUSG00000052712	McIlwain et al. 2010	RNA-seq	mouse E8.5 Smg1-null MEFs	alter splicing
Ap4b1	ENSMUSG00000032952	McIlwain et al. 2010	RNA-seq	mouse E8.5 Smg1-null MEFs	alter splicing
Git2	ENSMUSG00000041890	McIlwain et al. 2010	RNA-seq	mouse E8.5 Smg1-null MEFs	alter splicing
Phip	ENSMUSG00000032253	McIlwain et al. 2010	RNA-seq	mouse E8.5 Smg1-null MEFs	alter splicing
Hdgf	ENSMUSG00000004897	McIlwain et al. 2010	RNA-seq	mouse E8.5 Smg1-null MEFs	alter splicing
Pttg1ip	ENSMUSG00000009291	McIlwain et al. 2010	RNA-seq	mouse E8.5 Smg1-null MEFs	alter splicing
Vti1b	ENSMUSG00000021124	McIlwain et al. 2010	RNA-seq	mouse E8.5 Smg1-null MEFs	alter splicing
Dnajc1	ENSMUSG00000026740	McIlwain et al. 2010	RNA-seq	mouse E8.5 Smg1-null MEFs	alter splicing
Rai12	ENSMUSG00000018565	McIlwain et al. 2010	RNA-seq	mouse E8.5 Smg1-null MEFs	alter splicing
Copa	ENSMUSG00000026553	McIlwain et al. 2010	RNA-seq	mouse E8.5 Smg1-null MEFs	alter splicing
Xpo6	ENSMUSG00000000131	McIlwain et al. 2010	RNA-seq	mouse E8.5 Smg1-null MEFs	alter splicing
Egln1	ENSMUSG00000031987	McIlwain et al. 2010	RNA-seq	mouse E8.5 Smg1-null MEFs	alter splicing
Nt5c2	ENSMUSG00000025041	McIlwain et al. 2010	RNA-seq	mouse E8.5 Smg1-null MEFs	alter splicing
Med8	ENSMUSG00000006392	McIlwain et al. 2010	RNA-seq	mouse E8.5 Smg1-null MEFs	alter splicing
Renbp	ENSMUSG00000031387	McIlwain et al. 2010	RNA-seq	mouse E8.5 Smg1-null MEFs	alter splicing
Pml	ENSMUSG00000036570	McIlwain et al. 2010	RNA-seq	mouse E8.5 Smg1-null MEFs	alter splicing
Mnat1	ENSMUSG00000021103	McIlwain et al. 2010	RNA-seq	mouse E8.5 Smg1-null MEFs	alter splicing
Mtch1	ENSMUSG00000024012	McIlwain et al. 2010	RNA-seq	mouse E8.5 Smg1-null MEFs	alter splicing
2510006D16Rik	ENSMUSG00000028797	McIlwain et al. 2010	RNA-seq	mouse E8.5 Smg1-null MEFs	alter splicing
Rabep1	ENSMUSG00000020817	McIlwain et al. 2010	RNA-seq	mouse E8.5 Smg1-null MEFs	alter splicing
Afg3l1	ENSMUSG00000031967	McIlwain et al. 2010	RNA-seq	mouse E8.5 Smg1-null MEFs	alter splicing
Cox17	ENSMUSG00000046516	McIlwain et al. 2010	RNA-seq	mouse E8.5 Smg1-null MEFs	alter splicing
Tmem57	ENSMUSG00000028826	McIlwain et al. 2010	RNA-seq	mouse E8.5 Smg1-null MEFs	alter splicing
Rad50	ENSMUSG00000020380	McIlwain et al. 2010	RNA-seq	mouse E8.5 Smg1-null MEFs	alter splicing
Mphosph8	ENSMUSG00000079184	McIlwain et al. 2010	RNA-seq	mouse E8.5 Smg1-null MEFs	alter splicing
Lipa	ENSMUSG00000026818	McIlwain et al. 2010	RNA-seq	mouse E8.5 Smg1-null MEFs	alter splicing
D6Wsu176e	ENSMUSG00000029672	McIlwain et al. 2010	RNA-seq	mouse E8.5 Smg1-null MEFs	alter splicing
Cmas	ENSMUSG00000030282	McIlwain et al. 2010	RNA-seq	mouse E8.5 Smg1-null MEFs	alter splicing
Rab18	ENSMUSG00000073639	McIlwain et al. 2010	RNA-seq	mouse E8.5 Smg1-null MEFs	alter splicing
Mcoln1	ENSMUSG00000004567	McIlwain et al. 2010	RNA-seq	mouse E8.5 Smg1-null MEFs	alter splicing
Eprs	ENSMUSG00000026615	McIlwain et al. 2010	RNA-seq	mouse E8.5 Smg1-null MEFs	alter splicing
AI314180	ENSMUSG00000050812	McIlwain et al. 2010	RNA-seq	mouse E8.5 Smg1-null MEFs	alter splicing
Arfrp1	ENSMUSG00000038671	McIlwain et al. 2010	RNA-seq	mouse E8.5 Smg1-null MEFs	alter splicing
Ehmt2	ENSMUSG00000013787	McIlwain et al. 2010	RNA-seq	mouse E8.5 Smg1-null MEFs	alter splicing
Nucb2	ENSMUSG00000030659	McIlwain et al. 2010	RNA-seq	mouse E8.5 Smg1-null MEFs	alter splicing
Fubp3	ENSMUSG00000026843	McIlwain et al. 2010	RNA-seq	mouse E8.5 Smg1-null MEFs	alter splicing
Ict1	ENSMUSG00000018858	McIlwain et al. 2010	RNA-seq	mouse E8.5 Smg1-null MEFs	alter splicing
Atxn2	ENSMUSG00000042605	McIlwain et al. 2010	RNA-seq	mouse E8.5 Smg1-null MEFs	alter splicing
Vps41	ENSMUSG00000041236	McIlwain et al. 2010	RNA-seq	mouse E8.5 Smg1-null MEFs	alter splicing
Ryk	ENSMUSG00000032547	McIlwain et al. 2010	RNA-seq	mouse E8.5 Smg1-null MEFs	alter splicing
Snx6	ENSMUSG00000005656	McIlwain et al. 2010	RNA-seq	mouse E8.5 Smg1-null MEFs	alter splicing
Sfrs9	ENSMUSG00000029538	McIlwain et al. 2010	RNA-seq	mouse E8.5 Smg1-null MEFs	alter splicing
Pxdn	ENSMUSG00000020674	McIlwain et al. 2010	RNA-seq	mouse E8.5 Smg1-null MEFs	alter splicing
Prkrir	ENSMUSG00000030753	McIlwain et al. 2010	RNA-seq	mouse E8.5 Smg1-null MEFs	alter splicing
Wipi2	ENSMUSG00000029578	McIlwain et al. 2010	RNA-seq	mouse E8.5 Smg1-null MEFs	alter splicing
Pomgnt1	ENSMUSG00000028700	McIlwain et al. 2010	RNA-seq	mouse E8.5 Smg1-null MEFs	alter splicing
Cdc16	ENSMUSG00000038416	McIlwain et al. 2010	RNA-seq	mouse E8.5 Smg1-null MEFs	alter splicing
B230339M05Rik	ENSMUSG00000027652	McIlwain et al. 2010	RNA-seq	mouse E8.5 Smg1-null MEFs	alter splicing
Tomm34	ENSMUSG00000018322	McIlwain et al. 2010	RNA-seq	mouse E8.5 Smg1-null MEFs	alter splicing
Specc1	ENSMUSG00000042331	McIlwain et al. 2010	RNA-seq	mouse E8.5 Smg1-null MEFs	alter splicing
Dnajc18	ENSMUSG00000024350	McIlwain et al. 2010	RNA-seq	mouse E8.5 Smg1-null MEFs	alter splicing
Chmp6	ENSMUSG00000025371	McIlwain et al. 2010	RNA-seq	mouse E8.5 Smg1-null MEFs	alter splicing
1110005A23Rik	ENSMUSG00000078427	McIlwain et al. 2010	RNA-seq	mouse E8.5 Smg1-null MEFs	alter splicing
Thrap3	ENSMUSG00000043962	McIlwain et al. 2010	RNA-seq	mouse E8.5 Smg1-null MEFs	alter splicing
Slc25a3	ENSMUSG00000061904	McIlwain et al. 2010	RNA-seq	mouse E8.5 Smg1-null MEFs	alter splicing
Rhoj	ENSMUSG00000046768	McIlwain et al. 2010	RNA-seq	mouse E8.5 Smg1-null MEFs	alter splicing
Mtch2	ENSMUSG00000027282	McIlwain et al. 2010	RNA-seq	mouse E8.5 Smg1-null MEFs	alter splicing
Psmd11	ENSMUSG00000017428	McIlwain et al. 2010	RNA-seq	mouse E8.5 Smg1-null MEFs	alter splicing
Srp54c	ENSMUSG00000079108	McIlwain et al. 2010	RNA-seq	mouse E8.5 Smg1-null MEFs	alter splicing
Ubac1	ENSMUSG00000036352	McIlwain et al. 2010	RNA-seq	mouse E8.5 Smg1-null MEFs	alter splicing
Top2b	ENSMUSG00000017485	McIlwain et al. 2010	RNA-seq	mouse E8.5 Smg1-null MEFs	alter splicing
Mobkl3	ENSMUSG00000025979	McIlwain et al. 2010	RNA-seq	mouse E8.5 Smg1-null MEFs	alter splicing
Irak1	ENSMUSG00000031392	McIlwain et al. 2010	RNA-seq	mouse E8.5 Smg1-null MEFs	alter splicing
Cops5	ENSMUSG00000025917	McIlwain et al. 2010	RNA-seq	mouse E8.5 Smg1-null MEFs	alter splicing
Ube2w	ENSMUSG00000004849	McIlwain et al. 2010	RNA-seq	mouse E8.5 Smg1-null MEFs	alter splicing
Rab28	ENSMUSG00000029128	McIlwain et al. 2010	RNA-seq	mouse E8.5 Smg1-null MEFs	alter splicing
Polr2g	ENSMUSG00000071662	McIlwain et al. 2010	RNA-seq	mouse E8.5 Smg1-null MEFs	alter splicing
P4ha1	ENSMUSG00000019916	McIlwain et al. 2010	RNA-seq	mouse E8.5 Smg1-null MEFs	alter splicing
Csnk1g3	ENSMUSG00000073563	McIlwain et al. 2010	RNA-seq	mouse E8.5 Smg1-null MEFs	alter splicing
Atp6v1c1	ENSMUSG00000022295	McIlwain et al. 2010	RNA-seq	mouse E8.5 Smg1-null MEFs	alter splicing
Aftph	ENSMUSG00000049659	McIlwain et al. 2010	RNA-seq	mouse E8.5 Smg1-null MEFs	alter splicing
2310047O13Rik	ENSMUSG00000026767	McIlwain et al. 2010	RNA-seq	mouse E8.5 Smg1-null MEFs	alter splicing
Prpf4b	ENSMUSG00000021413	McIlwain et al. 2010	RNA-seq	mouse E8.5 Smg1-null MEFs	alter splicing
Wdr35	ENSMUSG00000066643	McIlwain et al. 2010	RNA-seq	mouse E8.5 Smg1-null MEFs	alter splicing
Phca	ENSMUSG00000030760	McIlwain et al. 2010	RNA-seq	mouse E8.5 Smg1-null MEFs	alter splicing
Gbf1	ENSMUSG00000025224	McIlwain et al. 2010	RNA-seq	mouse E8.5 Smg1-null MEFs	alter splicing
Fez2	ENSMUSG00000056121	McIlwain et al. 2010	RNA-seq	mouse E8.5 Smg1-null MEFs	alter splicing
Atp9b	ENSMUSG00000024566	McIlwain et al. 2010	RNA-seq	mouse E8.5 Smg1-null MEFs	alter splicing
Arl2bp	ENSMUSG00000031776	McIlwain et al. 2010	RNA-seq	mouse E8.5 Smg1-null MEFs	alter splicing
1500035H01Rik	ENSMUSG00000002031	McIlwain et al. 2010	RNA-seq	mouse E8.5 Smg1-null MEFs	alter splicing
Bnip2	ENSMUSG00000011958	McIlwain et al. 2010	RNA-seq	mouse E8.5 Smg1-null MEFs	alter splicing
Ap1m1	ENSMUSG00000003033	McIlwain et al. 2010	RNA-seq	mouse E8.5 Smg1-null MEFs	alter splicing
Napa	ENSMUSG00000006024	McIlwain et al. 2010	RNA-seq	mouse E8.5 Smg1-null MEFs	alter splicing
Mosc2	ENSMUSG00000073481	McIlwain et al. 2010	RNA-seq	mouse E8.5 Smg1-null MEFs	alter splicing
Cct8	ENSMUSG00000025613	McIlwain et al. 2010	RNA-seq	mouse E8.5 Smg1-null MEFs	alter splicing
Tmem131	ENSMUSG00000026116	McIlwain et al. 2010	RNA-seq	mouse E8.5 Smg1-null MEFs	alter splicing
Tubg2	ENSMUSG00000045007	McIlwain et al. 2010	RNA-seq	mouse E8.5 Smg1-null MEFs	alter splicing
Snx2	ENSMUSG00000034484	McIlwain et al. 2010	RNA-seq	mouse E8.5 Smg1-null MEFs	alter splicing
Smarca2	ENSMUSG00000024921	McIlwain et al. 2010	RNA-seq	mouse E8.5 Smg1-null MEFs	alter splicing
6430706D22Rik	ENSMUSG00000044783	McIlwain et al. 2010	RNA-seq	mouse E8.5 Smg1-null MEFs	alter splicing
Sdhc	ENSMUSG00000058076	McIlwain et al. 2010	RNA-seq	mouse E8.5 Smg1-null MEFs	alter splicing
Puf60	ENSMUSG00000002524	McIlwain et al. 2010	RNA-seq	mouse E8.5 Smg1-null MEFs	alter splicing
Ap3b1	ENSMUSG00000021686	McIlwain et al. 2010	RNA-seq	mouse E8.5 Smg1-null MEFs	alter splicing
Cttn	ENSMUSG00000031078	McIlwain et al. 2010	RNA-seq	mouse E8.5 Smg1-null MEFs	alter splicing
Camk2d	ENSMUSG00000053819	McIlwain et al. 2010	RNA-seq	mouse E8.5 Smg1-null MEFs	alter splicing
Ezh2	ENSMUSG00000029687	McIlwain et al. 2010	RNA-seq	mouse E8.5 Smg1-null MEFs	alter splicing
Lphn2	ENSMUSG00000028184	McIlwain et al. 2010	RNA-seq	mouse E8.5 Smg1-null MEFs	alter splicing
Ubr5	ENSMUSG00000037487	McIlwain et al. 2010	RNA-seq	mouse E8.5 Smg1-null MEFs	alter splicing
Slc38a10	ENSMUSG00000061306	McIlwain et al. 2010	RNA-seq	mouse E8.5 Smg1-null MEFs	alter splicing
Galnt10	ENSMUSG00000020520	McIlwain et al. 2010	RNA-seq	mouse E8.5 Smg1-null MEFs	alter splicing
Syncrip	ENSMUSG00000032423	McIlwain et al. 2010	RNA-seq	mouse E8.5 Smg1-null MEFs	alter splicing
Sugt1	ENSMUSG00000022024	McIlwain et al. 2010	RNA-seq	mouse E8.5 Smg1-null MEFs	alter splicing
Ireb2	ENSMUSG00000032293	McIlwain et al. 2010	RNA-seq	mouse E8.5 Smg1-null MEFs	alter splicing
Hsd17b12	ENSMUSG00000027195	McIlwain et al. 2010	RNA-seq	mouse E8.5 Smg1-null MEFs	alter splicing
Adsl	ENSMUSG00000022407	McIlwain et al. 2010	RNA-seq	mouse E8.5 Smg1-null MEFs	alter splicing
Acot9	ENSMUSG00000025287	McIlwain et al. 2010	RNA-seq	mouse E8.5 Smg1-null MEFs	alter splicing
Prdx3	ENSMUSG00000024997	McIlwain et al. 2010	RNA-seq	mouse E8.5 Smg1-null MEFs	alter splicing
Ppp2r3c	ENSMUSG00000021022	McIlwain et al. 2010	RNA-seq	mouse E8.5 Smg1-null MEFs	alter splicing
Dusp11	ENSMUSG00000030002	McIlwain et al. 2010	RNA-seq	mouse E8.5 Smg1-null MEFs	alter splicing
Cyb5r4	ENSMUSG00000032872	McIlwain et al. 2010	RNA-seq	mouse E8.5 Smg1-null MEFs	alter splicing
Cse1l	ENSMUSG00000002718	McIlwain et al. 2010	RNA-seq	mouse E8.5 Smg1-null MEFs	alter splicing
Ttyh3	ENSMUSG00000036565	McIlwain et al. 2010	RNA-seq	mouse E8.5 Smg1-null MEFs	alter splicing
Copz2	ENSMUSG00000018672	McIlwain et al. 2010	RNA-seq	mouse E8.5 Smg1-null MEFs	alter splicing
Adam9	ENSMUSG00000031555	McIlwain et al. 2010	RNA-seq	mouse E8.5 Smg1-null MEFs	alter splicing
Txndc4	ENSMUSG00000028343	McIlwain et al. 2010	RNA-seq	mouse E8.5 Smg1-null MEFs	alter splicing
Fkbp1a	ENSMUSG00000032966	McIlwain et al. 2010	RNA-seq	mouse E8.5 Smg1-null MEFs	alter splicing
Yars	ENSMUSG00000028811	McIlwain et al. 2010	RNA-seq	mouse E8.5 Smg1-null MEFs	alter splicing
Ergic1	ENSMUSG00000001576	McIlwain et al. 2010	RNA-seq	mouse E8.5 Smg1-null MEFs	alter splicing
Cmpk1	ENSMUSG00000028719	McIlwain et al. 2010	RNA-seq	mouse E8.5 Smg1-null MEFs	alter splicing
Stard7	ENSMUSG00000027367	McIlwain et al. 2010	RNA-seq	mouse E8.5 Smg1-null MEFs	alter splicing
Sptlc2	ENSMUSG00000028948	McIlwain et al. 2010	RNA-seq	mouse E8.5 Smg1-null MEFs	alter splicing
Papola	ENSMUSG00000021111	McIlwain et al. 2010	RNA-seq	mouse E8.5 Smg1-null MEFs	alter splicing
Mybbp1a	ENSMUSG00000040463	McIlwain et al. 2010	RNA-seq	mouse E8.5 Smg1-null MEFs	alter splicing
Ubxn2a	ENSMUSG00000020634	McIlwain et al. 2010	RNA-seq	mouse E8.5 Smg1-null MEFs	alter splicing
Tsg101	ENSMUSG00000014402	McIlwain et al. 2010	RNA-seq	mouse E8.5 Smg1-null MEFs	alter splicing
Slc25a17	ENSMUSG00000022404	McIlwain et al. 2010	RNA-seq	mouse E8.5 Smg1-null MEFs	alter splicing
Ppil2	ENSMUSG00000022771	McIlwain et al. 2010	RNA-seq	mouse E8.5 Smg1-null MEFs	alter splicing
Tkt	ENSMUSG00000026674	McIlwain et al. 2010	RNA-seq	mouse E8.5 Smg1-null MEFs	alter splicing
Tcf20	ENSMUSG00000041852	McIlwain et al. 2010	RNA-seq	mouse E8.5 Smg1-null MEFs	alter splicing
Rap1a	ENSMUSG00000068798	McIlwain et al. 2010	RNA-seq	mouse E8.5 Smg1-null MEFs	alter splicing
Cox19	ENSMUSG00000045438	McIlwain et al. 2010	RNA-seq	mouse E8.5 Smg1-null MEFs	alter splicing
Ankhd1	ENSMUSG00000024483	McIlwain et al. 2010	RNA-seq	mouse E8.5 Smg1-null MEFs	alter splicing
Agrn	ENSMUSG00000041936	McIlwain et al. 2010	RNA-seq	mouse E8.5 Smg1-null MEFs	alter splicing
Trim27	ENSMUSG00000021326	McIlwain et al. 2010	RNA-seq	mouse E8.5 Smg1-null MEFs	alter splicing
Ube2g1	ENSMUSG00000020794	McIlwain et al. 2010	RNA-seq	mouse E8.5 Smg1-null MEFs	alter splicing
Serpinb9b	ENSMUSG00000021403	McIlwain et al. 2010	RNA-seq	mouse E8.5 Smg1-null MEFs	alter splicing
Psmd5	ENSMUSG00000026869	McIlwain et al. 2010	RNA-seq	mouse E8.5 Smg1-null MEFs	alter splicing
Phtf1	ENSMUSG00000058388	McIlwain et al. 2010	RNA-seq	mouse E8.5 Smg1-null MEFs	alter splicing
Nuf2	ENSMUSG00000026683	McIlwain et al. 2010	RNA-seq	mouse E8.5 Smg1-null MEFs	alter splicing
Itpa	ENSMUSG00000074797	McIlwain et al. 2010	RNA-seq	mouse E8.5 Smg1-null MEFs	alter splicing
Gkap1	ENSMUSG00000021552	McIlwain et al. 2010	RNA-seq	mouse E8.5 Smg1-null MEFs	alter splicing
Mrpl15	ENSMUSG00000033845	McIlwain et al. 2010	RNA-seq	mouse E8.5 Smg1-null MEFs	alter splicing
Agps	ENSMUSG00000042410	McIlwain et al. 2010	RNA-seq	mouse E8.5 Smg1-null MEFs	alter splicing
Stk11	ENSMUSG00000003068	McIlwain et al. 2010	RNA-seq	mouse E8.5 Smg1-null MEFs	alter splicing
Pdxdc1	ENSMUSG00000022680	McIlwain et al. 2010	RNA-seq	mouse E8.5 Smg1-null MEFs	alter splicing
Ndufs1	ENSMUSG00000025968	McIlwain et al. 2010	RNA-seq	mouse E8.5 Smg1-null MEFs	alter splicing
H13		McIlwain et al. 2010	RNA-seq	mouse E8.5 Smg1-null MEFs	alter splicing
Casp2	ENSMUSG00000029863	McIlwain et al. 2010	RNA-seq	mouse E8.5 Smg1-null MEFs	alter splicing
Ak2	ENSMUSG00000028792	McIlwain et al. 2010	RNA-seq	mouse E8.5 Smg1-null MEFs	alter splicing
Vps26a	ENSMUSG00000020078	McIlwain et al. 2010	RNA-seq	mouse E8.5 Smg1-null MEFs	alter splicing
Ergic3	ENSMUSG00000005881	McIlwain et al. 2010	RNA-seq	mouse E8.5 Smg1-null MEFs	alter splicing
Elp2	ENSMUSG00000024271	McIlwain et al. 2010	RNA-seq	mouse E8.5 Smg1-null MEFs	alter splicing
Ciapin1	ENSMUSG00000031781	McIlwain et al. 2010	RNA-seq	mouse E8.5 Smg1-null MEFs	alter splicing
AI314976	ENSMUSG00000040771	McIlwain et al. 2010	RNA-seq	mouse E8.5 Smg1-null MEFs	alter splicing
Dicer1	ENSMUSG00000041415	McIlwain et al. 2010	RNA-seq	mouse E8.5 Smg1-null MEFs	alter splicing
Immt	ENSMUSG00000052337	McIlwain et al. 2010	RNA-seq	mouse E8.5 Smg1-null MEFs	alter splicing
Pdrg1	ENSMUSG00000027472	McIlwain et al. 2010	RNA-seq	mouse E8.5 Smg1-null MEFs	alter splicing
Idh3a	ENSMUSG00000032279	McIlwain et al. 2010	RNA-seq	mouse E8.5 Smg1-null MEFs	alter splicing
Ik	ENSMUSG00000024474	McIlwain et al. 2010	RNA-seq	mouse E8.5 Smg1-null MEFs	alter splicing
Copg	ENSMUSG00000030058	McIlwain et al. 2010	RNA-seq	mouse E8.5 Smg1-null MEFs	alter splicing
Ankrd13c	ENSMUSG00000039988	McIlwain et al. 2010	RNA-seq	mouse E8.5 Smg1-null MEFs	alter splicing
Nol5	ENSMUSG00000026020	McIlwain et al. 2010	RNA-seq	mouse E8.5 Smg1-null MEFs	alter splicing
Med21	ENSMUSG00000030291	McIlwain et al. 2010	RNA-seq	mouse E8.5 Smg1-null MEFs	alter splicing
Hnrnpm	ENSMUSG00000059208	McIlwain et al. 2010	RNA-seq	mouse E8.5 Smg1-null MEFs	alter splicing
Atp6v0a1	ENSMUSG00000019302	McIlwain et al. 2010	RNA-seq	mouse E8.5 Smg1-null MEFs	alter splicing
Crlf1	ENSMUSG00000007888	McIlwain et al. 2010	RNA-seq	mouse E8.5 Smg1-null MEFs	alter splicing
Txndc10	ENSMUSG00000024614	McIlwain et al. 2010	RNA-seq	mouse E8.5 Smg1-null MEFs	alter splicing
Tmem123	ENSMUSG00000056209	McIlwain et al. 2010	RNA-seq	mouse E8.5 Smg1-null MEFs	alter splicing
2900010J23Rik	ENSMUSG00000044627	McIlwain et al. 2010	RNA-seq	mouse E8.5 Smg1-null MEFs	alter splicing
Pcgf3	ENSMUSG00000033623	McIlwain et al. 2010	RNA-seq	mouse E8.5 Smg1-null MEFs	alter splicing
Stam	ENSMUSG00000026718	McIlwain et al. 2010	RNA-seq	mouse E8.5 Smg1-null MEFs	alter splicing
Dis3	ENSMUSG00000033166	McIlwain et al. 2010	RNA-seq	mouse E8.5 Smg1-null MEFs	alter splicing
Cenpt	ENSMUSG00000036672	McIlwain et al. 2010	RNA-seq	mouse E8.5 Smg1-null MEFs	alter splicing
Bap1	ENSMUSG00000021901	McIlwain et al. 2010	RNA-seq	mouse E8.5 Smg1-null MEFs	alter splicing
Surf4	ENSMUSG00000014867	McIlwain et al. 2010	RNA-seq	mouse E8.5 Smg1-null MEFs	alter splicing
Smad4	ENSMUSG00000024515	McIlwain et al. 2010	RNA-seq	mouse E8.5 Smg1-null MEFs	alter splicing
Sephs1	ENSMUSG00000026662	McIlwain et al. 2010	RNA-seq	mouse E8.5 Smg1-null MEFs	alter splicing
Gusb	ENSMUSG00000025534	McIlwain et al. 2010	RNA-seq	mouse E8.5 Smg1-null MEFs	alter splicing
Cope	ENSMUSG00000055681	McIlwain et al. 2010	RNA-seq	mouse E8.5 Smg1-null MEFs	alter splicing
BC004004	ENSMUSG00000052712	McIlwain et al. 2010	RNA-seq	mouse E8.5 Smg1-null MEFs	alter splicing
Mmp14	ENSMUSG00000000957	McIlwain et al. 2010	RNA-seq	mouse E8.5 Smg1-null MEFs	alter splicing
Dync1li2	ENSMUSG00000035770	McIlwain et al. 2010	RNA-seq	mouse E8.5 Smg1-null MEFs	alter splicing
Ndufa7	ENSMUSG00000041881	McIlwain et al. 2010	RNA-seq	mouse E8.5 Smg1-null MEFs	alter splicing
Srp72	ENSMUSG00000036323	McIlwain et al. 2010	RNA-seq	mouse E8.5 Smg1-null MEFs	alter splicing
Pcnx	ENSMUSG00000021140	McIlwain et al. 2010	RNA-seq	mouse E8.5 Smg1-null MEFs	alter splicing
Luc7l2	ENSMUSG00000029823	McIlwain et al. 2010	RNA-seq	mouse E8.5 Smg1-null MEFs	alter splicing
2810428I15Rik	ENSMUSG00000058833	McIlwain et al. 2010	RNA-seq	mouse E8.5 Smg1-null MEFs	alter splicing
Srp19	ENSMUSG00000014504	McIlwain et al. 2010	RNA-seq	mouse E8.5 Smg1-null MEFs	alter splicing
Elf2	ENSMUSG00000037174	McIlwain et al. 2010	RNA-seq	mouse E8.5 Smg1-null MEFs	alter splicing
Galnt1	ENSMUSG00000000420	McIlwain et al. 2010	RNA-seq	mouse E8.5 Smg1-null MEFs	alter splicing
Ddr1	ENSMUSG00000003534	McIlwain et al. 2010	RNA-seq	mouse E8.5 Smg1-null MEFs	alter splicing
Cars	ENSMUSG00000010755	McIlwain et al. 2010	RNA-seq	mouse E8.5 Smg1-null MEFs	alter splicing
2610024E20Rik	ENSMUSG00000036501	McIlwain et al. 2010	RNA-seq	mouse E8.5 Smg1-null MEFs	alter splicing
Wdr42a	ENSMUSG00000026554	McIlwain et al. 2010	RNA-seq	mouse E8.5 Smg1-null MEFs	alter splicing
Bax	ENSMUSG00000003873	McIlwain et al. 2010	RNA-seq	mouse E8.5 Smg1-null MEFs	alter splicing
Zmym2	ENSMUSG00000021945	McIlwain et al. 2010	RNA-seq	mouse E8.5 Smg1-null MEFs	alter splicing
Supt5h	ENSMUSG00000003435	McIlwain et al. 2010	RNA-seq	mouse E8.5 Smg1-null MEFs	alter splicing
Psmc6	ENSMUSG00000021832	McIlwain et al. 2010	RNA-seq	mouse E8.5 Smg1-null MEFs	alter splicing
Ipo13	ENSMUSG00000033365	McIlwain et al. 2010	RNA-seq	mouse E8.5 Smg1-null MEFs	alter splicing
Nexn	ENSMUSG00000039103	McIlwain et al. 2010	RNA-seq	mouse E8.5 Smg1-null MEFs	alter splicing
Chfr	ENSMUSG00000014668	McIlwain et al. 2010	RNA-seq	mouse E8.5 Smg1-null MEFs	alter splicing
Epb4.1l3	ENSMUSG00000024044	McIlwain et al. 2010	RNA-seq	mouse E8.5 Smg1-null MEFs	alter splicing
Ndrg1	ENSMUSG00000005125	McIlwain et al. 2010	RNA-seq	mouse E8.5 Smg1-null MEFs	alter splicing
Mett10d	ENSMUSG00000010554	McIlwain et al. 2010	RNA-seq	mouse E8.5 Smg1-null MEFs	alter splicing
Glrx3	ENSMUSG00000031068	McIlwain et al. 2010	RNA-seq	mouse E8.5 Smg1-null MEFs	alter splicing
Dkc1	ENSMUSG00000031403	McIlwain et al. 2010	RNA-seq	mouse E8.5 Smg1-null MEFs	alter splicing
Rela	ENSMUSG00000024927	McIlwain et al. 2010	RNA-seq	mouse E8.5 Smg1-null MEFs	alter splicing
Tmem126a	ENSMUSG00000030615	McIlwain et al. 2010	RNA-seq	mouse E8.5 Smg1-null MEFs	alter splicing
Reep5	ENSMUSG00000005873	McIlwain et al. 2010	RNA-seq	mouse E8.5 Smg1-null MEFs	alter splicing
Caprin1	ENSMUSG00000027184	McIlwain et al. 2010	RNA-seq	mouse E8.5 Smg1-null MEFs	alter splicing
Slc2a1	ENSMUSG00000028645	McIlwain et al. 2010	RNA-seq	mouse E8.5 Smg1-null MEFs	alter splicing
Mbd2	ENSMUSG00000115067	McIlwain et al. 2010	RNA-seq	mouse E8.5 Smg1-null MEFs	alter splicing
Fn1	ENSMUSG00000026193	McIlwain et al. 2010	RNA-seq	mouse E8.5 Smg1-null MEFs	alter splicing
Dscr3	ENSMUSG00000022898	McIlwain et al. 2010	RNA-seq	mouse E8.5 Smg1-null MEFs	alter splicing
Thoc7	ENSMUSG00000053453	McIlwain et al. 2010	RNA-seq	mouse E8.5 Smg1-null MEFs	alter splicing
Rer1	ENSMUSG00000029048	McIlwain et al. 2010	RNA-seq	mouse E8.5 Smg1-null MEFs	alter splicing
Nars	ENSMUSG00000024587	McIlwain et al. 2010	RNA-seq	mouse E8.5 Smg1-null MEFs	alter splicing
Map4k3	ENSMUSG00000024242	McIlwain et al. 2010	RNA-seq	mouse E8.5 Smg1-null MEFs	alter splicing
Maged1	ENSMUSG00000025151	McIlwain et al. 2010	RNA-seq	mouse E8.5 Smg1-null MEFs	alter splicing
Ei24	ENSMUSG00000062762	McIlwain et al. 2010	RNA-seq	mouse E8.5 Smg1-null MEFs	alter splicing
2310003C23Rik	ENSMUSG00000027573	McIlwain et al. 2010	RNA-seq	mouse E8.5 Smg1-null MEFs	alter splicing
Ufd1l	ENSMUSG00000005262	McIlwain et al. 2010	RNA-seq	mouse E8.5 Smg1-null MEFs	alter splicing
Rrm1	ENSMUSG00000030978	McIlwain et al. 2010	RNA-seq	mouse E8.5 Smg1-null MEFs	alter splicing
Pepd	ENSMUSG00000063931	McIlwain et al. 2010	RNA-seq	mouse E8.5 Smg1-null MEFs	alter splicing
Efha1	ENSMUSG00000021973	McIlwain et al. 2010	RNA-seq	mouse E8.5 Smg1-null MEFs	alter splicing
Skiv2l2	ENSMUSG00000016018	McIlwain et al. 2010	RNA-seq	mouse E8.5 Smg1-null MEFs	alter splicing
Tram1	ENSMUSG00000027678	McIlwain et al. 2010	RNA-seq	mouse E8.5 Smg1-null MEFs	alter splicing
Eif5	ENSMUSG00000021282	McIlwain et al. 2010	RNA-seq	mouse E8.5 Smg1-null MEFs	alter splicing
Wac	ENSMUSG00000024283	McIlwain et al. 2010	RNA-seq	mouse E8.5 Smg1-null MEFs	alter splicing
Tpd52	ENSMUSG00000027506	McIlwain et al. 2010	RNA-seq	mouse E8.5 Smg1-null MEFs	alter splicing
Rpn2	ENSMUSG00000026229	McIlwain et al. 2010	RNA-seq	mouse E8.5 Smg1-null MEFs	alter splicing
Atp6ap1	ENSMUSG00000019087	McIlwain et al. 2010	RNA-seq	mouse E8.5 Smg1-null MEFs	alter splicing
Npepps	ENSMUSG00000001441	McIlwain et al. 2010	RNA-seq	mouse E8.5 Smg1-null MEFs	alter splicing
Stk38	ENSMUSG00000024006	McIlwain et al. 2010	RNA-seq	mouse E8.5 Smg1-null MEFs	alter splicing
Gosr2	ENSMUSG00000020946	McIlwain et al. 2010	RNA-seq	mouse E8.5 Smg1-null MEFs	alter splicing
Ivns1abp	ENSMUSG00000023150	McIlwain et al. 2010	RNA-seq	mouse E8.5 Smg1-null MEFs	alter splicing
Rnaset2a	ENSMUSG00000095687	McIlwain et al. 2010	RNA-seq	mouse E8.5 Smg1-null MEFs	alter splicing
Ppp5c	ENSMUSG00000003099	McIlwain et al. 2010	RNA-seq	mouse E8.5 Smg1-null MEFs	alter splicing
Pa2g4	ENSMUSG00000025364	McIlwain et al. 2010	RNA-seq	mouse E8.5 Smg1-null MEFs	alter splicing
Canx	ENSMUSG00000020368	McIlwain et al. 2010	RNA-seq	mouse E8.5 Smg1-null MEFs	alter splicing
Rangap1	ENSMUSG00000022391	McIlwain et al. 2010	RNA-seq	mouse E8.5 Smg1-null MEFs	alter splicing
Kras	ENSMUSG00000030265	McIlwain et al. 2010	RNA-seq	mouse E8.5 Smg1-null MEFs	alter splicing
Rsu1	ENSMUSG00000026727	McIlwain et al. 2010	RNA-seq	mouse E8.5 Smg1-null MEFs	alter splicing
Anxa3	ENSMUSG00000029484	McIlwain et al. 2010	RNA-seq	mouse E8.5 Smg1-null MEFs	alter splicing
Yaf2	ENSMUSG00000022634	McIlwain et al. 2010	RNA-seq	mouse E8.5 Smg1-null MEFs	alter splicing
Tmem16f	ENSMUSG00000064210	McIlwain et al. 2010	RNA-seq	mouse E8.5 Smg1-null MEFs	alter splicing
Cpsf3l	ENSMUSG00000029034	McIlwain et al. 2010	RNA-seq	mouse E8.5 Smg1-null MEFs	alter splicing
Hmbs	ENSMUSG00000032126	McIlwain et al. 2010	RNA-seq	mouse E8.5 Smg1-null MEFs	alter splicing
Rps6kb1	ENSMUSG00000020516	McIlwain et al. 2010	RNA-seq	mouse E8.5 Smg1-null MEFs	alter splicing
Fdft1	ENSMUSG00000021273	McIlwain et al. 2010	RNA-seq	mouse E8.5 Smg1-null MEFs	alter splicing
Psmb2	ENSMUSG00000028837	McIlwain et al. 2010	RNA-seq	mouse E8.5 Smg1-null MEFs	alter splicing
Ndufa6	ENSMUSG00000022450	McIlwain et al. 2010	RNA-seq	mouse E8.5 Smg1-null MEFs	alter splicing
3930401K13Rik	ENSMUSG00000022536	McIlwain et al. 2010	RNA-seq	mouse E8.5 Smg1-null MEFs	alter splicing
Pdgfa	ENSMUSG00000025856	McIlwain et al. 2010	RNA-seq	mouse E8.5 Smg1-null MEFs	alter splicing
Nasp	ENSMUSG00000028693	McIlwain et al. 2010	RNA-seq	mouse E8.5 Smg1-null MEFs	alter splicing
2400001E08Rik	ENSMUSG00000030842	McIlwain et al. 2010	RNA-seq	mouse E8.5 Smg1-null MEFs	alter splicing
Uqcrc1	ENSMUSG00000025651	McIlwain et al. 2010	RNA-seq	mouse E8.5 Smg1-null MEFs	alter splicing
Tpm1		McIlwain et al. 2010	RNA-seq	mouse E8.5 Smg1-null MEFs	alter splicing
Tfb2m	ENSMUSG00000026492	McIlwain et al. 2010	RNA-seq	mouse E8.5 Smg1-null MEFs	alter splicing
Ptpn21	ENSMUSG00000021009	McIlwain et al. 2010	RNA-seq	mouse E8.5 Smg1-null MEFs	alter splicing
Nisch	ENSMUSG00000021910	McIlwain et al. 2010	RNA-seq	mouse E8.5 Smg1-null MEFs	alter splicing
Atp2a2	ENSMUSG00000029467	McIlwain et al. 2010	RNA-seq	mouse E8.5 Smg1-null MEFs	alter splicing
Laptm4a	ENSMUSG00000020585	McIlwain et al. 2010	RNA-seq	mouse E8.5 Smg1-null MEFs	alter splicing
Dpf2	ENSMUSG00000024826	McIlwain et al. 2010	RNA-seq	mouse E8.5 Smg1-null MEFs	alter splicing
Cetn3	ENSMUSG00000021537	McIlwain et al. 2010	RNA-seq	mouse E8.5 Smg1-null MEFs	alter splicing
Wnk1	ENSMUSG00000045962	McIlwain et al. 2010	RNA-seq	mouse E8.5 Smg1-null MEFs	alter splicing
Sepw1	ENSMUSG00000041571	McIlwain et al. 2010	RNA-seq	mouse E8.5 Smg1-null MEFs	alter splicing
Hs2st1	ENSMUSG00000040151	McIlwain et al. 2010	RNA-seq	mouse E8.5 Smg1-null MEFs	alter splicing
Sypl	ENSMUSG00000020570	McIlwain et al. 2010	RNA-seq	mouse E8.5 Smg1-null MEFs	alter splicing
Spop	ENSMUSG00000057522	McIlwain et al. 2010	RNA-seq	mouse E8.5 Smg1-null MEFs	alter splicing
Vps35	ENSMUSG00000031696	McIlwain et al. 2010	RNA-seq	mouse E8.5 Smg1-null MEFs	alter splicing
Col11a1	ENSMUSG00000027966	McIlwain et al. 2010	RNA-seq	mouse E8.5 Smg1-null MEFs	alter splicing
Synj2bp	ENSMUSG00000090935	McIlwain et al. 2010	RNA-seq	mouse E8.5 Smg1-null MEFs	alter splicing
1810020G14Rik	ENSMUSG00000091803	McIlwain et al. 2010	RNA-seq	mouse E8.5 Smg1-null MEFs	alter splicing
Lsm14b	ENSMUSG00000039108	McIlwain et al. 2010	RNA-seq	mouse E8.5 Smg1-null MEFs	alter splicing
Gpx4	ENSMUSG00000075706	McIlwain et al. 2010	RNA-seq	mouse E8.5 Smg1-null MEFs	alter splicing
Hras1	ENSMUSG00000025499	McIlwain et al. 2010	RNA-seq	mouse E8.5 Smg1-null MEFs	alter splicing
Ssr4	ENSMUSG00000002014	McIlwain et al. 2010	RNA-seq	mouse E8.5 Smg1-null MEFs	alter splicing
Odz3	ENSMUSG00000016150	McIlwain et al. 2010	RNA-seq	mouse E8.5 Smg1-null MEFs	alter splicing
Ubap2	ENSMUSG00000028433	McIlwain et al. 2010	RNA-seq	mouse E8.5 Smg1-null MEFs	alter splicing
Sars	ENSMUSG00000068739	McIlwain et al. 2010	RNA-seq	mouse E8.5 Smg1-null MEFs	alter splicing
Rbm26	ENSMUSG00000022119	McIlwain et al. 2010	RNA-seq	mouse E8.5 Smg1-null MEFs	alter splicing
Nptn	ENSMUSG00000032336	McIlwain et al. 2010	RNA-seq	mouse E8.5 Smg1-null MEFs	alter splicing
Gtf3c1	ENSMUSG00000032777	McIlwain et al. 2010	RNA-seq	mouse E8.5 Smg1-null MEFs	alter splicing
Bag1	ENSMUSG00000028416	McIlwain et al. 2010	RNA-seq	mouse E8.5 Smg1-null MEFs	alter splicing
Rock2	ENSMUSG00000020580	McIlwain et al. 2010	RNA-seq	mouse E8.5 Smg1-null MEFs	alter splicing
Atp5j2	ENSMUSG00000038690	McIlwain et al. 2010	RNA-seq	mouse E8.5 Smg1-null MEFs	alter splicing
Parva	ENSMUSG00000030770	McIlwain et al. 2010	RNA-seq	mouse E8.5 Smg1-null MEFs	alter splicing
Rars	ENSMUSG00000018848	McIlwain et al. 2010	RNA-seq	mouse E8.5 Smg1-null MEFs	alter splicing
Papss1	ENSMUSG00000028032	McIlwain et al. 2010	RNA-seq	mouse E8.5 Smg1-null MEFs	alter splicing
Cltb	ENSMUSG00000047547	McIlwain et al. 2010	RNA-seq	mouse E8.5 Smg1-null MEFs	alter splicing
Rrp1	ENSMUSG00000061032	McIlwain et al. 2010	RNA-seq	mouse E8.5 Smg1-null MEFs	alter splicing
Ccng1	ENSMUSG00000020326	McIlwain et al. 2010	RNA-seq	mouse E8.5 Smg1-null MEFs	alter splicing
Zfp512	ENSMUSG00000062761	McIlwain et al. 2010	RNA-seq	mouse E8.5 Smg1-null MEFs	alter splicing
Zfp277	ENSMUSG00000055917	McIlwain et al. 2010	RNA-seq	mouse E8.5 Smg1-null MEFs	alter splicing
Zfp106	ENSMUSG00000027288	McIlwain et al. 2010	RNA-seq	mouse E8.5 Smg1-null MEFs	alter splicing
Zdhhc13	ENSMUSG00000030471	McIlwain et al. 2010	RNA-seq	mouse E8.5 Smg1-null MEFs	alter splicing
Ywhae	ENSMUSG00000020849	McIlwain et al. 2010	RNA-seq	mouse E8.5 Smg1-null MEFs	alter splicing
Xrcc1	ENSMUSG00000051768	McIlwain et al. 2010	RNA-seq	mouse E8.5 Smg1-null MEFs	alter splicing
Xpo7	ENSMUSG00000022100	McIlwain et al. 2010	RNA-seq	mouse E8.5 Smg1-null MEFs	alter splicing
Xbp1	ENSMUSG00000020484	McIlwain et al. 2010	RNA-seq	mouse E8.5 Smg1-null MEFs	alter splicing
Wwp1	ENSMUSG00000041058	McIlwain et al. 2010	RNA-seq	mouse E8.5 Smg1-null MEFs	alter splicing
Wdr47	ENSMUSG00000040389	McIlwain et al. 2010	RNA-seq	mouse E8.5 Smg1-null MEFs	alter splicing
Wdr45l	ENSMUSG00000025173	McIlwain et al. 2010	RNA-seq	mouse E8.5 Smg1-null MEFs	alter splicing
Wdfy1	ENSMUSG00000073643	McIlwain et al. 2010	RNA-seq	mouse E8.5 Smg1-null MEFs	alter splicing
Vta1	ENSMUSG00000019868	McIlwain et al. 2010	RNA-seq	mouse E8.5 Smg1-null MEFs	alter splicing
Vps8	ENSMUSG00000033653	McIlwain et al. 2010	RNA-seq	mouse E8.5 Smg1-null MEFs	alter splicing
Vps54	ENSMUSG00000020128	McIlwain et al. 2010	RNA-seq	mouse E8.5 Smg1-null MEFs	alter splicing
Utp18	ENSMUSG00000054079	McIlwain et al. 2010	RNA-seq	mouse E8.5 Smg1-null MEFs	alter splicing
Utp11l	ENSMUSG00000028907	McIlwain et al. 2010	RNA-seq	mouse E8.5 Smg1-null MEFs	alter splicing
Usp4	ENSMUSG00000032612	McIlwain et al. 2010	RNA-seq	mouse E8.5 Smg1-null MEFs	alter splicing
Usp39	ENSMUSG00000056305	McIlwain et al. 2010	RNA-seq	mouse E8.5 Smg1-null MEFs	alter splicing
Usp33	ENSMUSG00000025437	McIlwain et al. 2010	RNA-seq	mouse E8.5 Smg1-null MEFs	alter splicing
Unc84a	ENSMUSG00000036817	McIlwain et al. 2010	RNA-seq	mouse E8.5 Smg1-null MEFs	alter splicing
Unc45a	ENSMUSG00000030533	McIlwain et al. 2010	RNA-seq	mouse E8.5 Smg1-null MEFs	alter splicing
Ugcgl1	ENSMUSG00000037470	McIlwain et al. 2010	RNA-seq	mouse E8.5 Smg1-null MEFs	alter splicing
Ufsp2	ENSMUSG00000031634	McIlwain et al. 2010	RNA-seq	mouse E8.5 Smg1-null MEFs	alter splicing
Ubxn4	ENSMUSG00000026353	McIlwain et al. 2010	RNA-seq	mouse E8.5 Smg1-null MEFs	alter splicing
Ube4a	ENSMUSG00000059890	McIlwain et al. 2010	RNA-seq	mouse E8.5 Smg1-null MEFs	alter splicing
Ube2g2	ENSMUSG00000009293	McIlwain et al. 2010	RNA-seq	mouse E8.5 Smg1-null MEFs	alter splicing
Ube2b	ENSMUSG00000020390	McIlwain et al. 2010	RNA-seq	mouse E8.5 Smg1-null MEFs	alter splicing
Ubap1	ENSMUSG00000028437	McIlwain et al. 2010	RNA-seq	mouse E8.5 Smg1-null MEFs	alter splicing
Uba3	ENSMUSG00000030061	McIlwain et al. 2010	RNA-seq	mouse E8.5 Smg1-null MEFs	alter splicing
Uba2	ENSMUSG00000052997	McIlwain et al. 2010	RNA-seq	mouse E8.5 Smg1-null MEFs	alter splicing
Uap1	ENSMUSG00000026670	McIlwain et al. 2010	RNA-seq	mouse E8.5 Smg1-null MEFs	alter splicing
Txndc9	ENSMUSG00000058407	McIlwain et al. 2010	RNA-seq	mouse E8.5 Smg1-null MEFs	alter splicing
Tsr1	ENSMUSG00000038335	McIlwain et al. 2010	RNA-seq	mouse E8.5 Smg1-null MEFs	alter splicing
Trim33	ENSMUSG00000033014	McIlwain et al. 2010	RNA-seq	mouse E8.5 Smg1-null MEFs	alter splicing
Tpd52l2	ENSMUSG00000000827	McIlwain et al. 2010	RNA-seq	mouse E8.5 Smg1-null MEFs	alter splicing
Tomm70a	ENSMUSG00000022752	McIlwain et al. 2010	RNA-seq	mouse E8.5 Smg1-null MEFs	alter splicing
Tom1l1	ENSMUSG00000020541	McIlwain et al. 2010	RNA-seq	mouse E8.5 Smg1-null MEFs	alter splicing
Tmpo	ENSMUSG00000019961	McIlwain et al. 2010	RNA-seq	mouse E8.5 Smg1-null MEFs	alter splicing
Tmem87b	ENSMUSG00000033808	McIlwain et al. 2010	RNA-seq	mouse E8.5 Smg1-null MEFs	alter splicing
Tmem63a	ENSMUSG00000026519	McIlwain et al. 2010	RNA-seq	mouse E8.5 Smg1-null MEFs	alter splicing
Tmem41b	ENSMUSG00000047554	McIlwain et al. 2010	RNA-seq	mouse E8.5 Smg1-null MEFs	alter splicing
Tmem33	ENSMUSG00000037720	McIlwain et al. 2010	RNA-seq	mouse E8.5 Smg1-null MEFs	alter splicing
Tmem161a	ENSMUSG00000002342	McIlwain et al. 2010	RNA-seq	mouse E8.5 Smg1-null MEFs	alter splicing
Tmem147	ENSMUSG00000006315	McIlwain et al. 2010	RNA-seq	mouse E8.5 Smg1-null MEFs	alter splicing
Tmbim4	ENSMUSG00000020225	McIlwain et al. 2010	RNA-seq	mouse E8.5 Smg1-null MEFs	alter splicing
Tm9sf2	ENSMUSG00000025544	McIlwain et al. 2010	RNA-seq	mouse E8.5 Smg1-null MEFs	alter splicing
Tbc1d20	ENSMUSG00000027465	McIlwain et al. 2010	RNA-seq	mouse E8.5 Smg1-null MEFs	alter splicing
Tbc1d19	ENSMUSG00000039178	McIlwain et al. 2010	RNA-seq	mouse E8.5 Smg1-null MEFs	alter splicing
Tbc1d14	ENSMUSG00000029192	McIlwain et al. 2010	RNA-seq	mouse E8.5 Smg1-null MEFs	alter splicing
Tax1bp1	ENSMUSG00000004535	McIlwain et al. 2010	RNA-seq	mouse E8.5 Smg1-null MEFs	alter splicing
Tapt1	ENSMUSG00000046985	McIlwain et al. 2010	RNA-seq	mouse E8.5 Smg1-null MEFs	alter splicing
Suz12	ENSMUSG00000017548	McIlwain et al. 2010	RNA-seq	mouse E8.5 Smg1-null MEFs	alter splicing
Stx8	ENSMUSG00000020903	McIlwain et al. 2010	RNA-seq	mouse E8.5 Smg1-null MEFs	alter splicing
Stx7	ENSMUSG00000019998	McIlwain et al. 2010	RNA-seq	mouse E8.5 Smg1-null MEFs	alter splicing
Stk17b	ENSMUSG00000026094	McIlwain et al. 2010	RNA-seq	mouse E8.5 Smg1-null MEFs	alter splicing
Spred2	ENSMUSG00000045671	McIlwain et al. 2010	RNA-seq	mouse E8.5 Smg1-null MEFs	alter splicing
Sppl3	ENSMUSG00000029550	McIlwain et al. 2010	RNA-seq	mouse E8.5 Smg1-null MEFs	alter splicing
Snx19	ENSMUSG00000031993	McIlwain et al. 2010	RNA-seq	mouse E8.5 Smg1-null MEFs	alter splicing
Snd1	ENSMUSG00000001424	McIlwain et al. 2010	RNA-seq	mouse E8.5 Smg1-null MEFs	alter splicing
Snapin	ENSMUSG00000001018	McIlwain et al. 2010	RNA-seq	mouse E8.5 Smg1-null MEFs	alter splicing
Smchd1	ENSMUSG00000024054	McIlwain et al. 2010	RNA-seq	mouse E8.5 Smg1-null MEFs	alter splicing
Smc1a	ENSMUSG00000041133	McIlwain et al. 2010	RNA-seq	mouse E8.5 Smg1-null MEFs	alter splicing
Slmo2	ENSMUSG00000016257	McIlwain et al. 2010	RNA-seq	mouse E8.5 Smg1-null MEFs	alter splicing
Slc4a1ap	ENSMUSG00000029141	McIlwain et al. 2010	RNA-seq	mouse E8.5 Smg1-null MEFs	alter splicing
Slc3a2	ENSMUSG00000010095	McIlwain et al. 2010	RNA-seq	mouse E8.5 Smg1-null MEFs	alter splicing
Slc35b1	ENSMUSG00000020873	McIlwain et al. 2010	RNA-seq	mouse E8.5 Smg1-null MEFs	alter splicing
Slc30a5	ENSMUSG00000021629	McIlwain et al. 2010	RNA-seq	mouse E8.5 Smg1-null MEFs	alter splicing
Slc25a39	ENSMUSG00000018677	McIlwain et al. 2010	RNA-seq	mouse E8.5 Smg1-null MEFs	alter splicing
Slc25a13	ENSMUSG00000015112	McIlwain et al. 2010	RNA-seq	mouse E8.5 Smg1-null MEFs	alter splicing
Shcbp1	ENSMUSG00000022322	McIlwain et al. 2010	RNA-seq	mouse E8.5 Smg1-null MEFs	alter splicing
Sh3glb2	ENSMUSG00000026860	McIlwain et al. 2010	RNA-seq	mouse E8.5 Smg1-null MEFs	alter splicing
Sfrs5	ENSMUSG00000021134	McIlwain et al. 2010	RNA-seq	mouse E8.5 Smg1-null MEFs	alter splicing
Selm	ENSMUSG00000075702	McIlwain et al. 2010	RNA-seq	mouse E8.5 Smg1-null MEFs	alter splicing
Sec24c	ENSMUSG00000039367	McIlwain et al. 2010	RNA-seq	mouse E8.5 Smg1-null MEFs	alter splicing
Sdc4	ENSMUSG00000017009	McIlwain et al. 2010	RNA-seq	mouse E8.5 Smg1-null MEFs	alter splicing
Scfd1	ENSMUSG00000020952	McIlwain et al. 2010	RNA-seq	mouse E8.5 Smg1-null MEFs	alter splicing
Samhd1	ENSMUSG00000027639	McIlwain et al. 2010	RNA-seq	mouse E8.5 Smg1-null MEFs	alter splicing
Sacm1l	ENSMUSG00000025240	McIlwain et al. 2010	RNA-seq	mouse E8.5 Smg1-null MEFs	alter splicing
Rrp12	ENSMUSG00000035049	McIlwain et al. 2010	RNA-seq	mouse E8.5 Smg1-null MEFs	alter splicing
Rpn1	ENSMUSG00000006998	McIlwain et al. 2010	RNA-seq	mouse E8.5 Smg1-null MEFs	alter splicing
Rpa1	ENSMUSG00000049553	McIlwain et al. 2010	RNA-seq	mouse E8.5 Smg1-null MEFs	alter splicing
Rnf38	ENSMUSG00000035696	McIlwain et al. 2010	RNA-seq	mouse E8.5 Smg1-null MEFs	alter splicing
Rnf214	ENSMUSG00000042790	McIlwain et al. 2010	RNA-seq	mouse E8.5 Smg1-null MEFs	alter splicing
Rnasen	ENSMUSG00000022191	McIlwain et al. 2010	RNA-seq	mouse E8.5 Smg1-null MEFs	alter splicing
Rhobtb3	ENSMUSG00000021589	McIlwain et al. 2010	RNA-seq	mouse E8.5 Smg1-null MEFs	alter splicing
Rdh10	ENSMUSG00000025921	McIlwain et al. 2010	RNA-seq	mouse E8.5 Smg1-null MEFs	alter splicing
Rcn2	ENSMUSG00000039601	McIlwain et al. 2010	RNA-seq	mouse E8.5 Smg1-null MEFs	alter splicing
Rbm38	ENSMUSG00000027510	McIlwain et al. 2010	RNA-seq	mouse E8.5 Smg1-null MEFs	alter splicing
Rbm25	ENSMUSG00000010608	McIlwain et al. 2010	RNA-seq	mouse E8.5 Smg1-null MEFs	alter splicing
Rbbp4	ENSMUSG00000057236	McIlwain et al. 2010	RNA-seq	mouse E8.5 Smg1-null MEFs	alter splicing
Ranbp9	ENSMUSG00000038546	McIlwain et al. 2010	RNA-seq	mouse E8.5 Smg1-null MEFs	alter splicing
Ranbp3	ENSMUSG00000002372	McIlwain et al. 2010	RNA-seq	mouse E8.5 Smg1-null MEFs	alter splicing
Rac1	ENSMUSG00000001847	McIlwain et al. 2010	RNA-seq	mouse E8.5 Smg1-null MEFs	alter splicing
Rab2a	ENSMUSG00000047187	McIlwain et al. 2010	RNA-seq	mouse E8.5 Smg1-null MEFs	alter splicing
Qdpr	ENSMUSG00000015806	McIlwain et al. 2010	RNA-seq	mouse E8.5 Smg1-null MEFs	alter splicing
Qars	ENSMUSG00000026615	McIlwain et al. 2010	RNA-seq	mouse E8.5 Smg1-null MEFs	alter splicing
Ptprs	ENSMUSG00000013236	McIlwain et al. 2010	RNA-seq	mouse E8.5 Smg1-null MEFs	alter splicing
Ptprf	ENSMUSG00000033295	McIlwain et al. 2010	RNA-seq	mouse E8.5 Smg1-null MEFs	alter splicing
Ptpn14	ENSMUSG00000026604	McIlwain et al. 2010	RNA-seq	mouse E8.5 Smg1-null MEFs	alter splicing
Pspc1	ENSMUSG00000021938	McIlwain et al. 2010	RNA-seq	mouse E8.5 Smg1-null MEFs	alter splicing
Psmc2	ENSMUSG00000028932	McIlwain et al. 2010	RNA-seq	mouse E8.5 Smg1-null MEFs	alter splicing
Psat1	ENSMUSG00000024640	McIlwain et al. 2010	RNA-seq	mouse E8.5 Smg1-null MEFs	alter splicing
Psap	ENSMUSG00000024012	McIlwain et al. 2010	RNA-seq	mouse E8.5 Smg1-null MEFs	alter splicing
Prmt7	ENSMUSG00000060098	McIlwain et al. 2010	RNA-seq	mouse E8.5 Smg1-null MEFs	alter splicing
Prmt3	ENSMUSG00000030505	McIlwain et al. 2010	RNA-seq	mouse E8.5 Smg1-null MEFs	alter splicing
Prmt2	ENSMUSG00000020230	McIlwain et al. 2010	RNA-seq	mouse E8.5 Smg1-null MEFs	alter splicing
Prmt1	ENSMUSG00000109324	McIlwain et al. 2010	RNA-seq	mouse E8.5 Smg1-null MEFs	alter splicing
Prdx5	ENSMUSG00000024953	McIlwain et al. 2010	RNA-seq	mouse E8.5 Smg1-null MEFs	alter splicing
Prdx2	ENSMUSG00000005161	McIlwain et al. 2010	RNA-seq	mouse E8.5 Smg1-null MEFs	alter splicing
Ppp2r5e	ENSMUSG00000021051	McIlwain et al. 2010	RNA-seq	mouse E8.5 Smg1-null MEFs	alter splicing
Ppp2r1a	ENSMUSG00000007564	McIlwain et al. 2010	RNA-seq	mouse E8.5 Smg1-null MEFs	alter splicing
Ppp1r12a	ENSMUSG00000019907	McIlwain et al. 2010	RNA-seq	mouse E8.5 Smg1-null MEFs	alter splicing
Ppa1	ENSMUSG00000020089	McIlwain et al. 2010	RNA-seq	mouse E8.5 Smg1-null MEFs	alter splicing
Polr2c	ENSMUSG00000031783	McIlwain et al. 2010	RNA-seq	mouse E8.5 Smg1-null MEFs	alter splicing
Pnp1	ENSMUSG00000115338	McIlwain et al. 2010	RNA-seq	mouse E8.5 Smg1-null MEFs	alter splicing
Plxna1	ENSMUSG00000030084	McIlwain et al. 2010	RNA-seq	mouse E8.5 Smg1-null MEFs	alter splicing
Pld3	ENSMUSG00000003363	McIlwain et al. 2010	RNA-seq	mouse E8.5 Smg1-null MEFs	alter splicing
Plaa	ENSMUSG00000028577	McIlwain et al. 2010	RNA-seq	mouse E8.5 Smg1-null MEFs	alter splicing
Pla2g4a	ENSMUSG00000056220	McIlwain et al. 2010	RNA-seq	mouse E8.5 Smg1-null MEFs	alter splicing
Pkn2	ENSMUSG00000004591	McIlwain et al. 2010	RNA-seq	mouse E8.5 Smg1-null MEFs	alter splicing
Pip5k1a	ENSMUSG00000028126	McIlwain et al. 2010	RNA-seq	mouse E8.5 Smg1-null MEFs	alter splicing
Pigp	ENSMUSG00000022940	McIlwain et al. 2010	RNA-seq	mouse E8.5 Smg1-null MEFs	alter splicing
Pigk	ENSMUSG00000039047	McIlwain et al. 2010	RNA-seq	mouse E8.5 Smg1-null MEFs	alter splicing
Picalm	ENSMUSG00000039361	McIlwain et al. 2010	RNA-seq	mouse E8.5 Smg1-null MEFs	alter splicing
Pgs1	ENSMUSG00000017715	McIlwain et al. 2010	RNA-seq	mouse E8.5 Smg1-null MEFs	alter splicing
Pgm3	ENSMUSG00000056131	McIlwain et al. 2010	RNA-seq	mouse E8.5 Smg1-null MEFs	alter splicing
Pfkl	ENSMUSG00000020277	McIlwain et al. 2010	RNA-seq	mouse E8.5 Smg1-null MEFs	alter splicing
Pfdn5	ENSMUSG00000001289	McIlwain et al. 2010	RNA-seq	mouse E8.5 Smg1-null MEFs	alter splicing
Pex3	ENSMUSG00000035395	McIlwain et al. 2010	RNA-seq	mouse E8.5 Smg1-null MEFs	alter splicing
Pex19	ENSMUSG00000003464	McIlwain et al. 2010	RNA-seq	mouse E8.5 Smg1-null MEFs	alter splicing
Pcyox1	ENSMUSG00000029998	McIlwain et al. 2010	RNA-seq	mouse E8.5 Smg1-null MEFs	alter splicing
Pcnxl3	ENSMUSG00000054874	McIlwain et al. 2010	RNA-seq	mouse E8.5 Smg1-null MEFs	alter splicing
Parp8	ENSMUSG00000021725	McIlwain et al. 2010	RNA-seq	mouse E8.5 Smg1-null MEFs	alter splicing
Pank3	ENSMUSG00000018846	McIlwain et al. 2010	RNA-seq	mouse E8.5 Smg1-null MEFs	alter splicing
Pak1ip1	ENSMUSG00000038683	McIlwain et al. 2010	RNA-seq	mouse E8.5 Smg1-null MEFs	alter splicing
Pafah1b1	ENSMUSG00000020745	McIlwain et al. 2010	RNA-seq	mouse E8.5 Smg1-null MEFs	alter splicing
Osbpl3	ENSMUSG00000029822	McIlwain et al. 2010	RNA-seq	mouse E8.5 Smg1-null MEFs	alter splicing
Orc6l	ENSMUSG00000031697	McIlwain et al. 2010	RNA-seq	mouse E8.5 Smg1-null MEFs	alter splicing
Nxf1	ENSMUSG00000010097	McIlwain et al. 2010	RNA-seq	mouse E8.5 Smg1-null MEFs	alter splicing
Nup153	ENSMUSG00000021374	McIlwain et al. 2010	RNA-seq	mouse E8.5 Smg1-null MEFs	alter splicing
Nup107	ENSMUSG00000052798	McIlwain et al. 2010	RNA-seq	mouse E8.5 Smg1-null MEFs	alter splicing
Nudt5	ENSMUSG00000025817	McIlwain et al. 2010	RNA-seq	mouse E8.5 Smg1-null MEFs	alter splicing
Nsmaf	ENSMUSG00000028245	McIlwain et al. 2010	RNA-seq	mouse E8.5 Smg1-null MEFs	alter splicing
Nrd1	ENSMUSG00000053510	McIlwain et al. 2010	RNA-seq	mouse E8.5 Smg1-null MEFs	alter splicing
Nptxr	ENSMUSG00000089837	McIlwain et al. 2010	RNA-seq	mouse E8.5 Smg1-null MEFs	alter splicing
Npr2	ENSMUSG00000028469	McIlwain et al. 2010	RNA-seq	mouse E8.5 Smg1-null MEFs	alter splicing
Nit2	ENSMUSG00000022751	McIlwain et al. 2010	RNA-seq	mouse E8.5 Smg1-null MEFs	alter splicing
Nfkb1	ENSMUSG00000028163	McIlwain et al. 2010	RNA-seq	mouse E8.5 Smg1-null MEFs	alter splicing
Nfix	ENSMUSG00000001911	McIlwain et al. 2010	RNA-seq	mouse E8.5 Smg1-null MEFs	alter splicing
Nfatc3	ENSMUSG00000031902	McIlwain et al. 2010	RNA-seq	mouse E8.5 Smg1-null MEFs	alter splicing
Nedd4	ENSMUSG00000032216	McIlwain et al. 2010	RNA-seq	mouse E8.5 Smg1-null MEFs	alter splicing
Nedd1	ENSMUSG00000019988	McIlwain et al. 2010	RNA-seq	mouse E8.5 Smg1-null MEFs	alter splicing
Ndufs2	ENSMUSG00000013593	McIlwain et al. 2010	RNA-seq	mouse E8.5 Smg1-null MEFs	alter splicing
Ndufa10	ENSMUSG00000026260	McIlwain et al. 2010	RNA-seq	mouse E8.5 Smg1-null MEFs	alter splicing
Ndfip1	ENSMUSG00000024425	McIlwain et al. 2010	RNA-seq	mouse E8.5 Smg1-null MEFs	alter splicing
Ncoa5	ENSMUSG00000039804	McIlwain et al. 2010	RNA-seq	mouse E8.5 Smg1-null MEFs	alter splicing
Nckap1	ENSMUSG00000027002	McIlwain et al. 2010	RNA-seq	mouse E8.5 Smg1-null MEFs	alter splicing
Ncapd2	ENSMUSG00000038252	McIlwain et al. 2010	RNA-seq	mouse E8.5 Smg1-null MEFs	alter splicing
N6amt2	ENSMUSG00000021951	McIlwain et al. 2010	RNA-seq	mouse E8.5 Smg1-null MEFs	alter splicing
Mrps18c	ENSMUSG00000016833	McIlwain et al. 2010	RNA-seq	mouse E8.5 Smg1-null MEFs	alter splicing
Mrps15	ENSMUSG00000028861	McIlwain et al. 2010	RNA-seq	mouse E8.5 Smg1-null MEFs	alter splicing
Mocs2	ENSMUSG00000015536	McIlwain et al. 2010	RNA-seq	mouse E8.5 Smg1-null MEFs	alter splicing
Mllt10	ENSMUSG00000026743	McIlwain et al. 2010	RNA-seq	mouse E8.5 Smg1-null MEFs	alter splicing
Mia3	ENSMUSG00000056050	McIlwain et al. 2010	RNA-seq	mouse E8.5 Smg1-null MEFs	alter splicing
Mfsd11	ENSMUSG00000020818	McIlwain et al. 2010	RNA-seq	mouse E8.5 Smg1-null MEFs	alter splicing
Mff	ENSMUSG00000026150	McIlwain et al. 2010	RNA-seq	mouse E8.5 Smg1-null MEFs	alter splicing
Metap2	ENSMUSG00000036112	McIlwain et al. 2010	RNA-seq	mouse E8.5 Smg1-null MEFs	alter splicing
Med20	ENSMUSG00000092558	McIlwain et al. 2010	RNA-seq	mouse E8.5 Smg1-null MEFs	alter splicing
Me2	ENSMUSG00000016028	McIlwain et al. 2010	RNA-seq	mouse E8.5 Smg1-null MEFs	alter splicing
Mdm4	ENSMUSG00000054387	McIlwain et al. 2010	RNA-seq	mouse E8.5 Smg1-null MEFs	alter splicing
Mast2	ENSMUSG00000003810	McIlwain et al. 2010	RNA-seq	mouse E8.5 Smg1-null MEFs	alter splicing
Map2k1ip1	ENSMUSG00000091512	McIlwain et al. 2010	RNA-seq	mouse E8.5 Smg1-null MEFs	alter splicing
Map2k1	ENSMUSG00000004936	McIlwain et al. 2010	RNA-seq	mouse E8.5 Smg1-null MEFs	alter splicing
Map1lc3a	ENSMUSG00000027602	McIlwain et al. 2010	RNA-seq	mouse E8.5 Smg1-null MEFs	alter splicing
Man2b1	ENSMUSG00000005142	McIlwain et al. 2010	RNA-seq	mouse E8.5 Smg1-null MEFs	alter splicing
Man1a2	ENSMUSG00000008763	McIlwain et al. 2010	RNA-seq	mouse E8.5 Smg1-null MEFs	alter splicing
Mak10	ENSMUSG00000021555	McIlwain et al. 2010	RNA-seq	mouse E8.5 Smg1-null MEFs	alter splicing
Magt1	ENSMUSG00000031232	McIlwain et al. 2010	RNA-seq	mouse E8.5 Smg1-null MEFs	alter splicing
Magohb	ENSMUSG00000028609	McIlwain et al. 2010	RNA-seq	mouse E8.5 Smg1-null MEFs	alter splicing
Lztr1	ENSMUSG00000022761	McIlwain et al. 2010	RNA-seq	mouse E8.5 Smg1-null MEFs	alter splicing
Lpcat1	ENSMUSG00000021608	McIlwain et al. 2010	RNA-seq	mouse E8.5 Smg1-null MEFs	alter splicing
Lims1	ENSMUSG00000019920	McIlwain et al. 2010	RNA-seq	mouse E8.5 Smg1-null MEFs	alter splicing
Lass2	ENSMUSG00000015714	McIlwain et al. 2010	RNA-seq	mouse E8.5 Smg1-null MEFs	alter splicing
Kif2a	ENSMUSG00000021693	McIlwain et al. 2010	RNA-seq	mouse E8.5 Smg1-null MEFs	alter splicing
Kctd20	ENSMUSG00000005936	McIlwain et al. 2010	RNA-seq	mouse E8.5 Smg1-null MEFs	alter splicing
Kctd10	ENSMUSG00000001098	McIlwain et al. 2010	RNA-seq	mouse E8.5 Smg1-null MEFs	alter splicing
Kank2	ENSMUSG00000032194	McIlwain et al. 2010	RNA-seq	mouse E8.5 Smg1-null MEFs	alter splicing
Jup	ENSMUSG00000001552	McIlwain et al. 2010	RNA-seq	mouse E8.5 Smg1-null MEFs	alter splicing
Jmjd6	ENSMUSG00000056962	McIlwain et al. 2010	RNA-seq	mouse E8.5 Smg1-null MEFs	alter splicing
Jmjd2a	ENSMUSG00000033326	McIlwain et al. 2010	RNA-seq	mouse E8.5 Smg1-null MEFs	alter splicing
Jak1	ENSMUSG00000028530	McIlwain et al. 2010	RNA-seq	mouse E8.5 Smg1-null MEFs	alter splicing
Itsn1	ENSMUSG00000022957	McIlwain et al. 2010	RNA-seq	mouse E8.5 Smg1-null MEFs	alter splicing
Itgb5	ENSMUSG00000022817	McIlwain et al. 2010	RNA-seq	mouse E8.5 Smg1-null MEFs	alter splicing
Iqcb1	ENSMUSG00000022837	McIlwain et al. 2010	RNA-seq	mouse E8.5 Smg1-null MEFs	alter splicing
Ipo4	ENSMUSG00000002319	McIlwain et al. 2010	RNA-seq	mouse E8.5 Smg1-null MEFs	alter splicing
Inppl1	ENSMUSG00000032737	McIlwain et al. 2010	RNA-seq	mouse E8.5 Smg1-null MEFs	alter splicing
Ilvbl	ENSMUSG00000032763	McIlwain et al. 2010	RNA-seq	mouse E8.5 Smg1-null MEFs	alter splicing
Ihpk1	ENSMUSG00000032594	McIlwain et al. 2010	RNA-seq	mouse E8.5 Smg1-null MEFs	alter splicing
Igf2bp3	ENSMUSG00000029814	McIlwain et al. 2010	RNA-seq	mouse E8.5 Smg1-null MEFs	alter splicing
Ift52	ENSMUSG00000017858	McIlwain et al. 2010	RNA-seq	mouse E8.5 Smg1-null MEFs	alter splicing
Ifngr1	ENSMUSG00000020009	McIlwain et al. 2010	RNA-seq	mouse E8.5 Smg1-null MEFs	alter splicing
Ifnar1	ENSMUSG00000022967	McIlwain et al. 2010	RNA-seq	mouse E8.5 Smg1-null MEFs	alter splicing
Idh1	ENSMUSG00000025950	McIlwain et al. 2010	RNA-seq	mouse E8.5 Smg1-null MEFs	alter splicing
Hspa4	ENSMUSG00000020361	McIlwain et al. 2010	RNA-seq	mouse E8.5 Smg1-null MEFs	alter splicing
Hn1l	ENSMUSG00000038002	McIlwain et al. 2010	RNA-seq	mouse E8.5 Smg1-null MEFs	alter splicing
Hgs	ENSMUSG00000025793	McIlwain et al. 2010	RNA-seq	mouse E8.5 Smg1-null MEFs	alter splicing
Hdgfrp2	ENSMUSG00000002833	McIlwain et al. 2010	RNA-seq	mouse E8.5 Smg1-null MEFs	alter splicing
Hdac3	ENSMUSG00000024454	McIlwain et al. 2010	RNA-seq	mouse E8.5 Smg1-null MEFs	alter splicing
Hccs	ENSMUSG00000031352	McIlwain et al. 2010	RNA-seq	mouse E8.5 Smg1-null MEFs	alter splicing
Hax1	ENSMUSG00000027944	McIlwain et al. 2010	RNA-seq	mouse E8.5 Smg1-null MEFs	alter splicing
H2-K1	ENSMUSG00000061232	McIlwain et al. 2010	RNA-seq	mouse E8.5 Smg1-null MEFs	alter splicing
Gtse1	ENSMUSG00000022385	McIlwain et al. 2010	RNA-seq	mouse E8.5 Smg1-null MEFs	alter splicing
Gtf3c2	ENSMUSG00000106864	McIlwain et al. 2010	RNA-seq	mouse E8.5 Smg1-null MEFs	alter splicing
Gtf2f1	ENSMUSG00000002658	McIlwain et al. 2010	RNA-seq	mouse E8.5 Smg1-null MEFs	alter splicing
Gstp2	ENSMUSG00000060803	McIlwain et al. 2010	RNA-seq	mouse E8.5 Smg1-null MEFs	alter splicing
Gspt1	ENSMUSG00000062203	McIlwain et al. 2010	RNA-seq	mouse E8.5 Smg1-null MEFs	alter splicing
Gpn3	ENSMUSG00000029464	McIlwain et al. 2010	RNA-seq	mouse E8.5 Smg1-null MEFs	alter splicing
Gosr1	ENSMUSG00000010392	McIlwain et al. 2010	RNA-seq	mouse E8.5 Smg1-null MEFs	alter splicing
Gnl3	ENSMUSG00000042354	McIlwain et al. 2010	RNA-seq	mouse E8.5 Smg1-null MEFs	alter splicing
Gmfb	ENSMUSG00000062014	McIlwain et al. 2010	RNA-seq	mouse E8.5 Smg1-null MEFs	alter splicing
Glod4	ENSMUSG00000017286	McIlwain et al. 2010	RNA-seq	mouse E8.5 Smg1-null MEFs	alter splicing
Ggcx	ENSMUSG00000053460	McIlwain et al. 2010	RNA-seq	mouse E8.5 Smg1-null MEFs	alter splicing
Gdi2	ENSMUSG00000021218	McIlwain et al. 2010	RNA-seq	mouse E8.5 Smg1-null MEFs	alter splicing
Ganab	ENSMUSG00000071650	McIlwain et al. 2010	RNA-seq	mouse E8.5 Smg1-null MEFs	alter splicing
Fus	ENSMUSG00000030795	McIlwain et al. 2010	RNA-seq	mouse E8.5 Smg1-null MEFs	alter splicing
Flii	ENSMUSG00000002812	McIlwain et al. 2010	RNA-seq	mouse E8.5 Smg1-null MEFs	alter splicing
Fkbp2	ENSMUSG00000032966	McIlwain et al. 2010	RNA-seq	mouse E8.5 Smg1-null MEFs	alter splicing
Fgfr2	ENSMUSG00000030849	McIlwain et al. 2010	RNA-seq	mouse E8.5 Smg1-null MEFs	alter splicing
Fgfr1op2	ENSMUSG00000040242	McIlwain et al. 2010	RNA-seq	mouse E8.5 Smg1-null MEFs	alter splicing
Fbxo3	ENSMUSG00000027180	McIlwain et al. 2010	RNA-seq	mouse E8.5 Smg1-null MEFs	alter splicing
Fbxo25	ENSMUSG00000038365	McIlwain et al. 2010	RNA-seq	mouse E8.5 Smg1-null MEFs	alter splicing
Fbn2	ENSMUSG00000024598	McIlwain et al. 2010	RNA-seq	mouse E8.5 Smg1-null MEFs	alter splicing
Farsa	ENSMUSG00000003808	McIlwain et al. 2010	RNA-seq	mouse E8.5 Smg1-null MEFs	alter splicing
Farp1	ENSMUSG00000025555	McIlwain et al. 2010	RNA-seq	mouse E8.5 Smg1-null MEFs	alter splicing
Fam175b	ENSMUSG00000030965	McIlwain et al. 2010	RNA-seq	mouse E8.5 Smg1-null MEFs	alter splicing
Exosc8	ENSMUSG00000027752	McIlwain et al. 2010	RNA-seq	mouse E8.5 Smg1-null MEFs	alter splicing
Ergic2	ENSMUSG00000030304	McIlwain et al. 2010	RNA-seq	mouse E8.5 Smg1-null MEFs	alter splicing
Erap1	ENSMUSG00000021583	McIlwain et al. 2010	RNA-seq	mouse E8.5 Smg1-null MEFs	alter splicing
Eps15	ENSMUSG00000028552	McIlwain et al. 2010	RNA-seq	mouse E8.5 Smg1-null MEFs	alter splicing
Emg1	ENSMUSG00000004268	McIlwain et al. 2010	RNA-seq	mouse E8.5 Smg1-null MEFs	alter splicing
Elmo2	ENSMUSG00000017670	McIlwain et al. 2010	RNA-seq	mouse E8.5 Smg1-null MEFs	alter splicing
Elavl1	ENSMUSG00000040028	McIlwain et al. 2010	RNA-seq	mouse E8.5 Smg1-null MEFs	alter splicing
Eif3h	ENSMUSG00000022312	McIlwain et al. 2010	RNA-seq	mouse E8.5 Smg1-null MEFs	alter splicing
Eif3b	ENSMUSG00000056076	McIlwain et al. 2010	RNA-seq	mouse E8.5 Smg1-null MEFs	alter splicing
Eif2b1	ENSMUSG00000029388	McIlwain et al. 2010	RNA-seq	mouse E8.5 Smg1-null MEFs	alter splicing
Efr3a	ENSMUSG00000015002	McIlwain et al. 2010	RNA-seq	mouse E8.5 Smg1-null MEFs	alter splicing
Dst	ENSMUSG00000026131	McIlwain et al. 2010	RNA-seq	mouse E8.5 Smg1-null MEFs	alter splicing
Drg1	ENSMUSG00000020457	McIlwain et al. 2010	RNA-seq	mouse E8.5 Smg1-null MEFs	alter splicing
Dpp8	ENSMUSG00000032393	McIlwain et al. 2010	RNA-seq	mouse E8.5 Smg1-null MEFs	alter splicing
Dnajc7	ENSMUSG00000014195	McIlwain et al. 2010	RNA-seq	mouse E8.5 Smg1-null MEFs	alter splicing
Dnajc2	ENSMUSG00000029014	McIlwain et al. 2010	RNA-seq	mouse E8.5 Smg1-null MEFs	alter splicing
Dnajc11	ENSMUSG00000039768	McIlwain et al. 2010	RNA-seq	mouse E8.5 Smg1-null MEFs	alter splicing
Dlst	ENSMUSG00000004789	McIlwain et al. 2010	RNA-seq	mouse E8.5 Smg1-null MEFs	alter splicing
Dlgap4	ENSMUSG00000061689	McIlwain et al. 2010	RNA-seq	mouse E8.5 Smg1-null MEFs	alter splicing
Dhx30	ENSMUSG00000032480	McIlwain et al. 2010	RNA-seq	mouse E8.5 Smg1-null MEFs	alter splicing
Dgka	ENSMUSG00000025357	McIlwain et al. 2010	RNA-seq	mouse E8.5 Smg1-null MEFs	alter splicing
Decr2	ENSMUSG00000036775	McIlwain et al. 2010	RNA-seq	mouse E8.5 Smg1-null MEFs	alter splicing
Ddx17	ENSMUSG00000055065	McIlwain et al. 2010	RNA-seq	mouse E8.5 Smg1-null MEFs	alter splicing
D5Wsu178e	ENSMUSG00000075703	McIlwain et al. 2010	RNA-seq	mouse E8.5 Smg1-null MEFs	alter splicing
D15Ertd621e	ENSMUSG00000037119	McIlwain et al. 2010	RNA-seq	mouse E8.5 Smg1-null MEFs	alter splicing
D0HXS9928E	ENSMUSG00000001962	McIlwain et al. 2010	RNA-seq	mouse E8.5 Smg1-null MEFs	alter splicing
D030074E01Rik	ENSMUSG00000033382	McIlwain et al. 2010	RNA-seq	mouse E8.5 Smg1-null MEFs	alter splicing
Cyfip1	ENSMUSG00000030447	McIlwain et al. 2010	RNA-seq	mouse E8.5 Smg1-null MEFs	alter splicing
Cwc15	ENSMUSG00000004096	McIlwain et al. 2010	RNA-seq	mouse E8.5 Smg1-null MEFs	alter splicing
Ctps2	ENSMUSG00000031360	McIlwain et al. 2010	RNA-seq	mouse E8.5 Smg1-null MEFs	alter splicing
Ctbp1	ENSMUSG00000037373	McIlwain et al. 2010	RNA-seq	mouse E8.5 Smg1-null MEFs	alter splicing
Ctage5	ENSMUSG00000021000	McIlwain et al. 2010	RNA-seq	mouse E8.5 Smg1-null MEFs	alter splicing
Cstf2	ENSMUSG00000031256	McIlwain et al. 2010	RNA-seq	mouse E8.5 Smg1-null MEFs	alter splicing
Csnk1d	ENSMUSG00000025162	McIlwain et al. 2010	RNA-seq	mouse E8.5 Smg1-null MEFs	alter splicing
Csde1	ENSMUSG00000068823	McIlwain et al. 2010	RNA-seq	mouse E8.5 Smg1-null MEFs	alter splicing
Crtc2	ENSMUSG00000027936	McIlwain et al. 2010	RNA-seq	mouse E8.5 Smg1-null MEFs	alter splicing
Crebl1	ENSMUSG00000015461	McIlwain et al. 2010	RNA-seq	mouse E8.5 Smg1-null MEFs	alter splicing
Crcp	ENSMUSG00000025532	McIlwain et al. 2010	RNA-seq	mouse E8.5 Smg1-null MEFs	alter splicing
Cpsf1	ENSMUSG00000034022	McIlwain et al. 2010	RNA-seq	mouse E8.5 Smg1-null MEFs	alter splicing
Cox4nb	ENSMUSG00000031819	McIlwain et al. 2010	RNA-seq	mouse E8.5 Smg1-null MEFs	alter splicing
Cops8	ENSMUSG00000034432	McIlwain et al. 2010	RNA-seq	mouse E8.5 Smg1-null MEFs	alter splicing
Cops3	ENSMUSG00000019373	McIlwain et al. 2010	RNA-seq	mouse E8.5 Smg1-null MEFs	alter splicing
Cobra1	ENSMUSG00000013465	McIlwain et al. 2010	RNA-seq	mouse E8.5 Smg1-null MEFs	alter splicing
Cnot10	ENSMUSG00000056167	McIlwain et al. 2010	RNA-seq	mouse E8.5 Smg1-null MEFs	alter splicing
Clu	ENSMUSG00000022037	McIlwain et al. 2010	RNA-seq	mouse E8.5 Smg1-null MEFs	alter splicing
Clstn1	ENSMUSG00000039953	McIlwain et al. 2010	RNA-seq	mouse E8.5 Smg1-null MEFs	alter splicing
Clk3	ENSMUSG00000032316	McIlwain et al. 2010	RNA-seq	mouse E8.5 Smg1-null MEFs	alter splicing
Cdc20	ENSMUSG00000006398	McIlwain et al. 2010	RNA-seq	mouse E8.5 Smg1-null MEFs	alter splicing
Cd9	ENSMUSG00000030342	McIlwain et al. 2010	RNA-seq	mouse E8.5 Smg1-null MEFs	alter splicing
Cct7	ENSMUSG00000030007	McIlwain et al. 2010	RNA-seq	mouse E8.5 Smg1-null MEFs	alter splicing
Ccnc	ENSMUSG00000028252	McIlwain et al. 2010	RNA-seq	mouse E8.5 Smg1-null MEFs	alter splicing
Cbfb	ENSMUSG00000031885	McIlwain et al. 2010	RNA-seq	mouse E8.5 Smg1-null MEFs	alter splicing
Cand1	ENSMUSG00000020114	McIlwain et al. 2010	RNA-seq	mouse E8.5 Smg1-null MEFs	alter splicing
Cacnb3	ENSMUSG00000003352	McIlwain et al. 2010	RNA-seq	mouse E8.5 Smg1-null MEFs	alter splicing
C80913	ENSMUSG00000030421	McIlwain et al. 2010	RNA-seq	mouse E8.5 Smg1-null MEFs	alter splicing
C330027C09Rik	ENSMUSG00000033031	McIlwain et al. 2010	RNA-seq	mouse E8.5 Smg1-null MEFs	alter splicing
C330007P06Rik	ENSMUSG00000006423	McIlwain et al. 2010	RNA-seq	mouse E8.5 Smg1-null MEFs	alter splicing
Bsg	ENSMUSG00000023175	McIlwain et al. 2010	RNA-seq	mouse E8.5 Smg1-null MEFs	alter splicing
Brd7	ENSMUSG00000031660	McIlwain et al. 2010	RNA-seq	mouse E8.5 Smg1-null MEFs	alter splicing
Bcl7c	ENSMUSG00000030814	McIlwain et al. 2010	RNA-seq	mouse E8.5 Smg1-null MEFs	alter splicing
BC016423	ENSMUSG00000033799	McIlwain et al. 2010	RNA-seq	mouse E8.5 Smg1-null MEFs	alter splicing
BC011248	ENSMUSG00000023971	McIlwain et al. 2010	RNA-seq	mouse E8.5 Smg1-null MEFs	alter splicing
Bat2d	ENSMUSG00000040225	McIlwain et al. 2010	RNA-seq	mouse E8.5 Smg1-null MEFs	alter splicing
Azin1	ENSMUSG00000037458	McIlwain et al. 2010	RNA-seq	mouse E8.5 Smg1-null MEFs	alter splicing
Atrnl1	ENSMUSG00000054843	McIlwain et al. 2010	RNA-seq	mouse E8.5 Smg1-null MEFs	alter splicing
Atpbd4	ENSMUSG00000057147	McIlwain et al. 2010	RNA-seq	mouse E8.5 Smg1-null MEFs	alter splicing
Atp8b2	ENSMUSG00000060671	McIlwain et al. 2010	RNA-seq	mouse E8.5 Smg1-null MEFs	alter splicing
Atic	ENSMUSG00000026192	McIlwain et al. 2010	RNA-seq	mouse E8.5 Smg1-null MEFs	alter splicing
Atg5	ENSMUSG00000038160	McIlwain et al. 2010	RNA-seq	mouse E8.5 Smg1-null MEFs	alter splicing
Ascc2	ENSMUSG00000020412	McIlwain et al. 2010	RNA-seq	mouse E8.5 Smg1-null MEFs	alter splicing
Asah1	ENSMUSG00000031591	McIlwain et al. 2010	RNA-seq	mouse E8.5 Smg1-null MEFs	alter splicing
Arl6ip2	ENSMUSG00000059811	McIlwain et al. 2010	RNA-seq	mouse E8.5 Smg1-null MEFs	alter splicing
Arl6ip1	ENSMUSG00000030654	McIlwain et al. 2010	RNA-seq	mouse E8.5 Smg1-null MEFs	alter splicing
Arih2	ENSMUSG00000064145	McIlwain et al. 2010	RNA-seq	mouse E8.5 Smg1-null MEFs	alter splicing
Arih1	ENSMUSG00000025234	McIlwain et al. 2010	RNA-seq	mouse E8.5 Smg1-null MEFs	alter splicing
Ap1b1	ENSMUSG00000009090	McIlwain et al. 2010	RNA-seq	mouse E8.5 Smg1-null MEFs	alter splicing
Anxa2	ENSMUSG00000032231	McIlwain et al. 2010	RNA-seq	mouse E8.5 Smg1-null MEFs	alter splicing
Ankrd17	ENSMUSG00000055204	McIlwain et al. 2010	RNA-seq	mouse E8.5 Smg1-null MEFs	alter splicing
Ankib1	ENSMUSG00000040351	McIlwain et al. 2010	RNA-seq	mouse E8.5 Smg1-null MEFs	alter splicing
Ankfy1	ENSMUSG00000020790	McIlwain et al. 2010	RNA-seq	mouse E8.5 Smg1-null MEFs	alter splicing
Anapc5	ENSMUSG00000029472	McIlwain et al. 2010	RNA-seq	mouse E8.5 Smg1-null MEFs	alter splicing
Aldoa	ENSMUSG00000030695	McIlwain et al. 2010	RNA-seq	mouse E8.5 Smg1-null MEFs	alter splicing
Akap8	ENSMUSG00000024045	McIlwain et al. 2010	RNA-seq	mouse E8.5 Smg1-null MEFs	alter splicing
Ahsa1	ENSMUSG00000021037	McIlwain et al. 2010	RNA-seq	mouse E8.5 Smg1-null MEFs	alter splicing
Ahcyl1	ENSMUSG00000027893	McIlwain et al. 2010	RNA-seq	mouse E8.5 Smg1-null MEFs	alter splicing
Agpat6	ENSMUSG00000031545	McIlwain et al. 2010	RNA-seq	mouse E8.5 Smg1-null MEFs	alter splicing
Adam19	ENSMUSG00000011256	McIlwain et al. 2010	RNA-seq	mouse E8.5 Smg1-null MEFs	alter splicing
Actr3	ENSMUSG00000026341	McIlwain et al. 2010	RNA-seq	mouse E8.5 Smg1-null MEFs	alter splicing
Actr10	ENSMUSG00000021076	McIlwain et al. 2010	RNA-seq	mouse E8.5 Smg1-null MEFs	alter splicing
Actl6a	ENSMUSG00000027671	McIlwain et al. 2010	RNA-seq	mouse E8.5 Smg1-null MEFs	alter splicing
Acox1	ENSMUSG00000020777	McIlwain et al. 2010	RNA-seq	mouse E8.5 Smg1-null MEFs	alter splicing
Aco2	ENSMUSG00000022477	McIlwain et al. 2010	RNA-seq	mouse E8.5 Smg1-null MEFs	alter splicing
Acd	ENSMUSG00000038000	McIlwain et al. 2010	RNA-seq	mouse E8.5 Smg1-null MEFs	alter splicing
Acadm	ENSMUSG00000062908	McIlwain et al. 2010	RNA-seq	mouse E8.5 Smg1-null MEFs	alter splicing
A630042L21Rik	ENSMUSG00000024622	McIlwain et al. 2010	RNA-seq	mouse E8.5 Smg1-null MEFs	alter splicing
6330569M22Rik	ENSMUSG00000014601	McIlwain et al. 2010	RNA-seq	mouse E8.5 Smg1-null MEFs	alter splicing
6030443O07Rik	ENSMUSG00000036097	McIlwain et al. 2010	RNA-seq	mouse E8.5 Smg1-null MEFs	alter splicing
5730453I16Rik	ENSMUSG00000034820	McIlwain et al. 2010	RNA-seq	mouse E8.5 Smg1-null MEFs	alter splicing
4932417H02Rik	ENSMUSG00000025583	McIlwain et al. 2010	RNA-seq	mouse E8.5 Smg1-null MEFs	alter splicing
4930402H24Rik	ENSMUSG00000027309	McIlwain et al. 2010	RNA-seq	mouse E8.5 Smg1-null MEFs	alter splicing
2610507B11Rik	ENSMUSG00000010277	McIlwain et al. 2010	RNA-seq	mouse E8.5 Smg1-null MEFs	alter splicing
2410001C21Rik	ENSMUSG00000027502	McIlwain et al. 2010	RNA-seq	mouse E8.5 Smg1-null MEFs	alter splicing
1300001I01Rik	ENSMUSG00000020741	McIlwain et al. 2010	RNA-seq	mouse E8.5 Smg1-null MEFs	alter splicing
Ubfd1	ENSMUSG00000030870	McIlwain et al. 2010	RNA-seq	mouse E8.5 Smg1-null MEFs	alter splicing
Tor1aip1	ENSMUSG00000026466	McIlwain et al. 2010	RNA-seq	mouse E8.5 Smg1-null MEFs	alter splicing
Tle4	ENSMUSG00000024642	McIlwain et al. 2010	RNA-seq	mouse E8.5 Smg1-null MEFs	alter splicing
Tbc1d23	ENSMUSG00000022749	McIlwain et al. 2010	RNA-seq	mouse E8.5 Smg1-null MEFs	alter splicing
Snrpn	ENSMUSG00000102252	McIlwain et al. 2010	RNA-seq	mouse E8.5 Smg1-null MEFs	alter splicing
Snap23	ENSMUSG00000027287	McIlwain et al. 2010	RNA-seq	mouse E8.5 Smg1-null MEFs	alter splicing
Slit2	ENSMUSG00000031558	McIlwain et al. 2010	RNA-seq	mouse E8.5 Smg1-null MEFs	alter splicing
Slc7a5	ENSMUSG00000040010	McIlwain et al. 2010	RNA-seq	mouse E8.5 Smg1-null MEFs	alter splicing
Sec61a1	ENSMUSG00000030082	McIlwain et al. 2010	RNA-seq	mouse E8.5 Smg1-null MEFs	alter splicing
Sec11a	ENSMUSG00000025724	McIlwain et al. 2010	RNA-seq	mouse E8.5 Smg1-null MEFs	alter splicing
Rtf1	ENSMUSG00000027304	McIlwain et al. 2010	RNA-seq	mouse E8.5 Smg1-null MEFs	alter splicing
Rnf115	ENSMUSG00000028098	McIlwain et al. 2010	RNA-seq	mouse E8.5 Smg1-null MEFs	alter splicing
Rgl1	ENSMUSG00000040345	McIlwain et al. 2010	RNA-seq	mouse E8.5 Smg1-null MEFs	alter splicing
Rell1	ENSMUSG00000047881	McIlwain et al. 2010	RNA-seq	mouse E8.5 Smg1-null MEFs	alter splicing
Rc3h2	ENSMUSG00000075376	McIlwain et al. 2010	RNA-seq	mouse E8.5 Smg1-null MEFs	alter splicing
[truncated: 1,754 more rows]
