# Supplementary material for: The role of the NMD factor UPF3B in olfactory sensory neurons
Source: eLife. 2020 Aug 10;9:e57525. doi: 10.7554/eLife.57525 (PMC7452722; doi:10.7554/eLife.57525)
Supplement: Supplementary file 4. — (1) Genes exhibiting enriched expression in all OE cell types identified by scRNA-seq analysis. (2) Genes exhibiting enriched expression in HBC, GBC, iOSN, and mOSN sub-clusters identfied by scRNA-seq analysis. (3) Genes exhibiting enriched expression in the 4 temporally distinct gene groups defined by pseudotime trajectory analysis of HBCs, GBCs, iOSNs, and mOSNs. (4) Transcription factor (TF) genes exhibiting enriched expression in the 4 temporally distinct gene groups defined by pseudotime trajectory analysis of HBCs, GBCs, iOSNs, and mOSNs. [file elife-57525-supp4.xlsx]

## Sheet: Enriched gene in each cell type
Enriched genes in different cell types identified from scRNA-seq analysis
gene	p_val	avg_logFC	pct.1	pct.2	p_val_adj	cluster
Sec14l3	0	3.10093	0.99	0.126	0	Sust.
Cyp2g1	0	2.94222	0.988	0.332	0	Sust.
Cyp2a5	0	2.81836	0.994	0.378	0	Sust.
Gstm1	0	2.60445	0.933	0.403	0	Sust.
Cbr2	0	2.44973	0.999	0.421	0	Sust.
Tst	0	2.4278	0.984	0.216	0	Sust.
Prdx6	0	2.1931	0.992	0.419	0	Sust.
Aox2	0	2.17444	0.948	0.128	0	Sust.
Pon1	0	2.01625	0.909	0.098	0	Sust.
Cyp2f2	0	2.0054	0.981	0.241	0	Sust.
Muc2	0	1.99272	0.871	0.053	0	Sust.
Cyb5a	0	1.97602	0.996	0.513	0	Sust.
Il33	0	1.93485	0.881	0.061	0	Sust.
Galm	0	1.9328	0.952	0.123	0	Sust.
Pgrmc1	0	1.92396	0.984	0.404	0	Sust.
Por	0	1.86723	0.943	0.247	0	Sust.
Dcn	0	1.86381	0.829	0.065	0	Sust.
Gchfr	0	1.86347	0.856	0.041	0	Sust.
Mgst1	0	1.85861	0.982	0.346	0	Sust.
AU021092	0	1.82585	0.879	0.054	0	Sust.
Sec14l2	0	1.81018	0.865	0.097	0	Sust.
Agr2	0	1.72232	0.925	0.131	0	Sust.
Akr1a1	0	1.6968	0.988	0.524	0	Sust.
Gstm2	0	1.66911	0.899	0.13	0	Sust.
Ermn	0	1.61981	0.872	0.075	0	Sust.
Lypd2	0	1.6192	0.919	0.146	0	Sust.
Cpm	0	1.60625	0.615	0.045	0	Sust.
Tex33	0	1.60124	0.753	0.04	0	Sust.
Nupr1	0	1.59169	0.828	0.21	0	Sust.
Blvrb	0	1.58543	0.917	0.194	0	Sust.
Cyp1a2	0	1.5767	0.816	0.066	0	Sust.
Prdx1	0	1.57195	0.993	0.754	0	Sust.
Gsta4	0	1.5622	0.867	0.123	0	Sust.
Aqp3	0	1.55765	0.936	0.141	0	Sust.
Dcxr	0	1.55764	0.859	0.119	0	Sust.
Aldh2	0	1.55557	0.967	0.375	0	Sust.
S100a1	0	1.54725	0.939	0.27	0	Sust.
Gpr155	0	1.53215	0.786	0.079	0	Sust.
Csrp2	0	1.50202	0.865	0.172	0	Sust.
Mettl7a1	0	1.50026	0.863	0.153	0	Sust.
Tmem213	0	1.48421	0.751	0.065	0	Sust.
Krt18	0	1.44374	0.973	0.3	0	Sust.
Epas1	0	1.42866	0.877	0.151	0	Sust.
Calml4	0	1.37336	0.705	0.043	0	Sust.
Tyro3	0	1.36706	0.747	0.05	0	Sust.
Ptp4a1	0	1.36633	0.898	0.269	0	Sust.
Ifitm1	0	1.33443	0.794	0.138	0	Sust.
Gldn	0	1.31094	0.639	0.016	0	Sust.
Ces1d	0	1.30722	0.875	0.159	0	Sust.
Ugdh	0	1.3043	0.829	0.167	0	Sust.
Id1	0	1.3031	0.736	0.114	0	Sust.
Lpgat1	0	1.28517	0.789	0.125	0	Sust.
Hes1	0	1.28277	0.74	0.137	0	Sust.
Aamdc	0	1.27439	0.776	0.107	0	Sust.
Pqlc3	0	1.26499	0.729	0.07	0	Sust.
Atox1	0	1.25691	0.998	0.872	0	Sust.
Alas1	0	1.25212	0.751	0.121	0	Sust.
Hspb1	0	1.25009	0.727	0.106	0	Sust.
Cyp2j6	0	1.24043	0.673	0.04	0	Sust.
Slc16a11	0	1.23615	0.898	0.285	0	Sust.
Skp1a	0	1.2356	0.966	0.523	0	Sust.
Papss2	0	1.23503	0.575	0.081	0	Sust.
Chpt1	0	1.22516	0.764	0.106	0	Sust.
Gpx4	0	1.20673	0.984	0.782	0	Sust.
Abca13	0	1.20333	0.658	0.05	0	Sust.
Kcnj5	0	1.19962	0.54	0.018	0	Sust.
Gpm6b	0	1.19508	0.796	0.129	0	Sust.
Cryab	0	1.18223	0.623	0.063	0	Sust.
Mgll	0	1.17626	0.664	0.045	0	Sust.
Muc16	0	1.17161	0.667	0.023	0	Sust.
Clic6	0	1.17154	0.785	0.106	0	Sust.
Aqp4	0	1.16975	0.779	0.119	0	Sust.
Cyb5r3	0	1.1692	0.778	0.159	0	Sust.
Dapl1	0	1.16809	0.742	0.116	0	Sust.
Clu	0	1.16612	0.835	0.144	0	Sust.
Aldh1a7	0	1.15907	0.574	0.026	0	Sust.
Hk2	0	1.15206	0.583	0.105	0	Sust.
Entpd5	0	1.1502	0.768	0.118	0	Sust.
Ephx1	0	1.14849	0.641	0.065	0	Sust.
Elf5	0	1.1466	0.706	0.059	0	Sust.
Tsku	0	1.13939	0.579	0.047	0	Sust.
Igfbp5	0	1.12944	0.732	0.139	0	Sust.
Kcnk2	0	1.11867	0.6	0.016	0	Sust.
Slc31a1	0	1.11736	0.747	0.128	0	Sust.
Crabp2	0	1.10889	0.682	0.065	0	Sust.
Hlf	0	1.10478	0.63	0.054	0	Sust.
Hey1	0	1.10181	0.704	0.073	0	Sust.
Rfk	0	1.10052	0.81	0.332	0	Sust.
Cdh26	0	1.09912	0.622	0.034	0	Sust.
Rmdn3	0	1.098	0.706	0.104	0	Sust.
Sod1	0	1.09351	0.916	0.445	0	Sust.
Cd36	0	1.06933	0.708	0.073	0	Sust.
Dab2	0	1.06837	0.565	0.037	0	Sust.
Acadm	0	1.06518	0.782	0.164	0	Sust.
Rhoc	0	1.05189	0.651	0.077	0	Sust.
Cryl1	0	1.04122	0.668	0.067	0	Sust.
Parva	0	1.04033	0.689	0.089	0	Sust.
Sox2	0	1.03948	0.693	0.093	0	Sust.
Insl6	0	1.02903	0.439	0.017	0	Sust.
Wls	0	1.02215	0.808	0.204	0	Sust.
Ggt7	0	1.01961	0.702	0.087	0	Sust.
Txnrd1	0	1.01809	0.732	0.173	0	Sust.
Phb2	0	1.01759	0.86	0.337	0	Sust.
Atp13a5	0	1.01729	0.559	0.019	0	Sust.
Cyp4v3	0	1.01374	0.594	0.048	0	Sust.
Mfap3l	0	1.00898	0.614	0.045	0	Sust.
Gusb	0	1.00538	0.636	0.088	0	Sust.
Dpys	0	0.995019	0.531	0.02	0	Sust.
Nadk2	0	0.991901	0.637	0.083	0	Sust.
Krt8	0	0.98997	0.878	0.232	0	Sust.
Dpy30	0	0.977118	0.895	0.428	0	Sust.
Eno3	0	0.976096	0.456	0.023	0	Sust.
Arl6ip1	0	0.9718	0.958	0.587	0	Sust.
Serpinb11	0	0.965495	0.518	0.033	0	Sust.
2010007H06Rik	0	0.947797	0.521	0.033	0	Sust.
Lima1	0	0.944867	0.701	0.172	0	Sust.
Aqp5	0	0.943734	0.742	0.123	0	Sust.
Cdh1	0	0.932133	0.673	0.125	0	Sust.
Tmem205	0	0.930744	0.706	0.165	0	Sust.
Selenbp1	0	0.915761	0.5	0.045	0	Sust.
Osbpl1a	0	0.912868	0.724	0.188	0	Sust.
Slc27a2	0	0.894487	0.772	0.267	0	Sust.
Fmo2	0	0.893706	0.574	0.075	0	Sust.
Atp11a	0	0.892072	0.703	0.151	0	Sust.
4931406C07Rik	0	0.89047	0.514	0.059	0	Sust.
Slc4a7	0	0.884119	0.568	0.085	0	Sust.
Ece1	0	0.883127	0.777	0.24	0	Sust.
Agr3	0	0.882388	0.528	0.033	0	Sust.
Gmpr	0	0.876522	0.504	0.046	0	Sust.
Creg1	0	0.875693	0.738	0.21	0	Sust.
Eya1	0	0.869949	0.669	0.122	0	Sust.
Zfp467	0	0.865391	0.622	0.092	0	Sust.
Gdf11	0	0.864504	0.502	0.03	0	Sust.
Gm6086	0	0.862697	0.482	0.021	0	Sust.
Cept1	0	0.861557	0.641	0.133	0	Sust.
Aldoc	0	0.853832	0.51	0.053	0	Sust.
Zfp36l1	0	0.85062	0.73	0.187	0	Sust.
Tcf4	0	0.849287	0.831	0.358	0	Sust.
Spint2	0	0.847339	0.954	0.55	0	Sust.
Cd302	0	0.847291	0.547	0.063	0	Sust.
Atp6v1b1	0	0.846121	0.534	0.042	0	Sust.
Gabarapl1	0	0.841416	0.746	0.253	0	Sust.
Otx2	0	0.840231	0.622	0.102	0	Sust.
Sord	0	0.835581	0.544	0.058	0	Sust.
St3gal6	0	0.832359	0.577	0.066	0	Sust.
Steap2	0	0.83002	0.605	0.088	0	Sust.
Abhd14b	0	0.828409	0.574	0.084	0	Sust.
Crym	0	0.809986	0.529	0.087	0	Sust.
Alad	0	0.805109	0.598	0.112	0	Sust.
Alox15	0	0.804833	0.4	0.009	0	Sust.
Pla2r1	0	0.804518	0.49	0.044	0	Sust.
Tkt	0	0.803741	0.889	0.381	0	Sust.
Lrp2	0	0.800459	0.477	0.026	0	Sust.
Cyp4b1	0	0.799582	0.281	0.013	0	Sust.
Atp6v0a4	0	0.796737	0.449	0.027	0	Sust.
Clta	0	0.796021	0.919	0.546	0	Sust.
Ptprf	0	0.787635	0.65	0.156	0	Sust.
Adam28	0	0.786505	0.592	0.092	0	Sust.
Nipal1	0	0.780117	0.432	0.009	0	Sust.
Nucb2	0	0.778085	0.607	0.132	0	Sust.
Sdc4	0	0.776277	0.738	0.193	0	Sust.
Vamp8	0	0.771484	0.821	0.331	0	Sust.
Pvrl3	0	0.767335	0.471	0.03	0	Sust.
Rrp12	0	0.762948	0.453	0.035	0	Sust.
St6gal1	0	0.762519	0.542	0.106	0	Sust.
Sar1b	0	0.759233	0.777	0.325	0	Sust.
S100a16	0	0.758919	0.548	0.064	0	Sust.
Gm42722	0	0.747162	0.562	0.101	0	Sust.
Atp6v1c2	0	0.747153	0.559	0.078	0	Sust.
Gsta3	0	0.746941	0.601	0.093	0	Sust.
Pax6	0	0.744474	0.547	0.085	0	Sust.
Slc39a2	0	0.74413	0.378	0.009	0	Sust.
Steap1	0	0.744029	0.404	0.019	0	Sust.
Chd3	0	0.74106	0.628	0.166	0	Sust.
Apc	0	0.73962	0.661	0.208	0	Sust.
Fam126a	0	0.736371	0.513	0.073	0	Sust.
Laptm4a	0	0.735792	0.858	0.395	0	Sust.
Grhl1	0	0.73518	0.482	0.039	0	Sust.
St8sia6	0	0.734346	0.456	0.026	0	Sust.
Micalcl	0	0.731378	0.441	0.044	0	Sust.
Pdzk1ip1	0	0.731348	0.454	0.043	0	Sust.
Cldn7	0	0.728502	0.658	0.15	0	Sust.
Txnip	0	0.726662	0.609	0.158	0	Sust.
Six3	0	0.725636	0.515	0.074	0	Sust.
Tspan12	0	0.725216	0.488	0.06	0	Sust.
Plekha5	0	0.724907	0.518	0.078	0	Sust.
Mecom	0	0.722435	0.554	0.105	0	Sust.
Stxbp6	0	0.720986	0.495	0.066	0	Sust.
Slc26a7	0	0.720405	0.496	0.059	0	Sust.
Cd63	0	0.718903	0.862	0.312	0	Sust.
1810011O10Rik	0	0.717851	0.458	0.053	0	Sust.
Cd164	0	0.717402	0.712	0.251	0	Sust.
Rbm47	0	0.715016	0.584	0.109	0	Sust.
Smim4	0	0.714651	0.627	0.176	0	Sust.
Cnn3	0	0.713205	0.829	0.285	0	Sust.
Slc9a3r1	0	0.712294	0.671	0.191	0	Sust.
Prss36	0	0.711828	0.419	0.029	0	Sust.
Zmynd12	0	0.709272	0.352	0.011	0	Sust.
Slc5a1	0	0.708056	0.398	0.016	0	Sust.
Ugt2a1	0	0.69719	0.372	0.027	0	Sust.
Gpm6a	0	0.696829	0.798	0.281	0	Sust.
Gm11744	0	0.695441	0.415	0.034	0	Sust.
Abcd3	0	0.692253	0.534	0.093	0	Sust.
Slc35a3	0	0.690171	0.526	0.103	0	Sust.
Idh1	0	0.690046	0.597	0.154	0	Sust.
Cd82	0	0.690009	0.657	0.178	0	Sust.
Tnfaip2	0	0.689064	0.492	0.091	0	Sust.
Aldh1a1	0	0.679604	0.479	0.071	0	Sust.
Slc15a2	0	0.678966	0.519	0.088	0	Sust.
Slc35d1	0	0.678601	0.453	0.06	0	Sust.
Rhod	0	0.675	0.391	0.024	0	Sust.
Notch2	0	0.673316	0.391	0.078	0	Sust.
Upb1	0	0.671211	0.41	0.026	0	Sust.
Sema4b	0	0.670494	0.452	0.079	0	Sust.
Sp8	0	0.669823	0.451	0.06	0	Sust.
Ezr	0	0.665822	0.675	0.21	0	Sust.
Adi1	0	0.663981	0.485	0.08	0	Sust.
Aqp11	0	0.661444	0.439	0.042	0	Sust.
Mapt	0	0.651344	0.406	0.05	0	Sust.
Rgs12	0	0.649762	0.452	0.06	0	Sust.
Fbp2	0	0.649396	0.364	0.009	0	Sust.
Lmo7	0	0.648446	0.457	0.071	0	Sust.
Mxd4	0	0.640411	0.598	0.173	0	Sust.
Pitx1	0	0.639163	0.461	0.069	0	Sust.
Gstt3	0	0.638797	0.422	0.04	0	Sust.
Otx2os1	0	0.635245	0.393	0.029	0	Sust.
Bicd1	0	0.633273	0.506	0.121	0	Sust.
Tgfb2	0	0.632052	0.413	0.048	0	Sust.
Lap3	0	0.631617	0.516	0.102	0	Sust.
Dmrta2	0	0.629995	0.48	0.074	0	Sust.
2610507B11Rik	0	0.627622	0.548	0.135	0	Sust.
Serpinb7	0	0.627367	0.329	0.008	0	Sust.
Gm16136	0	0.626781	0.458	0.072	0	Sust.
Fdx1	0	0.626526	0.557	0.136	0	Sust.
Epb41l2	0	0.624725	0.537	0.13	0	Sust.
Fbxo32	0	0.622739	0.519	0.121	0	Sust.
Rragd	0	0.622078	0.517	0.115	0	Sust.
Cers4	0	0.621052	0.42	0.054	0	Sust.
Hspb8	0	0.620913	0.43	0.044	0	Sust.
Insig1	0	0.619645	0.431	0.069	0	Sust.
Idh2	0	0.619089	0.553	0.144	0	Sust.
Tmod1	0	0.614656	0.381	0.029	0	Sust.
Gsta2	0	0.614014	0.337	0.014	0	Sust.
Slco1a5	0	0.611962	0.359	0.013	0	Sust.
Phtf1	0	0.60868	0.479	0.089	0	Sust.
Pon3	0	0.602693	0.582	0.151	0	Sust.
Cyp4f15	0	0.600409	0.347	0.01	0	Sust.
Rassf2	0	0.591162	0.463	0.092	0	Sust.
Ildr1	0	0.584844	0.472	0.084	0	Sust.
Iqgap2	0	0.581968	0.449	0.093	0	Sust.
Mab21l1	0	0.581133	0.383	0.04	0	Sust.
Il17re	0	0.580676	0.365	0.022	0	Sust.
Tmprss2	0	0.577773	0.336	0.016	0	Sust.
Slc23a2	0	0.565357	0.44	0.067	0	Sust.
Nt5dc2	0	0.564715	0.345	0.045	0	Sust.
Sgms1	0	0.563301	0.419	0.078	0	Sust.
Sh3pxd2a	0	0.562944	0.466	0.1	0	Sust.
Ephb1	0	0.560108	0.357	0.02	0	Sust.
Alg14	0	0.55971	0.393	0.052	0	Sust.
Ccnd1	0	0.554873	0.411	0.084	0	Sust.
Cdk14	0	0.553608	0.395	0.051	0	Sust.
Pdlim4	0	0.55234	0.37	0.047	0	Sust.
Cdo1	0	0.552121	0.401	0.055	0	Sust.
Fth1	0	0.544839	1	0.972	0	Sust.
Sfrp1	0	0.544001	0.415	0.055	0	Sust.
Atp10b	0	0.53888	0.296	0.009	0	Sust.
Pea15a	0	0.537109	0.419	0.068	0	Sust.
Tmem30b	0	0.537092	0.404	0.068	0	Sust.
Acad11	0	0.535185	0.421	0.066	0	Sust.
Crot	0	0.535134	0.458	0.093	0	Sust.
Slc11a2	0	0.533069	0.417	0.068	0	Sust.
Ppp1r9a	0	0.530842	0.354	0.035	0	Sust.
Kcnk1	0	0.529793	0.408	0.056	0	Sust.
Hrsp12	0	0.528807	0.447	0.095	0	Sust.
Six1	0	0.527192	0.446	0.093	0	Sust.
Fam101b	0	0.526176	0.515	0.127	0	Sust.
Dbp	0	0.52607	0.38	0.064	0	Sust.
Pepd	0	0.524273	0.376	0.061	0	Sust.
Per3	0	0.520617	0.391	0.063	0	Sust.
Meis2	0	0.519906	0.462	0.089	0	Sust.
Fam107a	0	0.517334	0.342	0.041	0	Sust.
Mdk	0	0.514609	0.402	0.072	0	Sust.
Klhl23	0	0.514059	0.338	0.034	0	Sust.
Sh3yl1	0	0.513994	0.345	0.04	0	Sust.
Depdc7	0	0.513045	0.284	0.014	0	Sust.
Cracr2b	0	0.511499	0.374	0.051	0	Sust.
Myh14	0	0.509706	0.41	0.066	0	Sust.
Tcf7l2	0	0.509163	0.374	0.059	0	Sust.
Fap	0	0.507698	0.294	0.019	0	Sust.
5930430L01Rik	0	0.506227	0.367	0.045	0	Sust.
Hykk	0	0.505819	0.284	0.011	0	Sust.
Oprk1	0	0.504673	0.277	0.007	0	Sust.
Abcc3	0	0.504117	0.327	0.031	0	Sust.
Cmtm8	0	0.502551	0.43	0.079	0	Sust.
Gm684	0	0.501661	0.305	0.019	0	Sust.
Serinc5	0	0.496024	0.351	0.041	0	Sust.
Lpin1	0	0.49422	0.404	0.075	0	Sust.
Map2	0	0.489931	0.406	0.085	0	Sust.
Tc2n	0	0.484524	0.329	0.041	0	Sust.
Dhrs4	0	0.479556	0.387	0.081	0	Sust.
Plscr2	0	0.477722	0.26	0.014	0	Sust.
Mapk12	0	0.477627	0.3	0.029	0	Sust.
Itpr2	0	0.47572	0.335	0.045	0	Sust.
Lrrc26	0	0.472467	0.281	0.022	0	Sust.
Msrb3	0	0.468671	0.305	0.022	0	Sust.
Cybrd1	0	0.466228	0.256	0.006	0	Sust.
Sox21	0	0.464978	0.331	0.044	0	Sust.
Pdlim3	0	0.461232	0.303	0.02	0	Sust.
Prss8	0	0.456526	0.319	0.04	0	Sust.
Fut9	0	0.453741	0.269	0.017	0	Sust.
Ntn1	0	0.450343	0.293	0.015	0	Sust.
Hadh	0	0.443587	0.367	0.071	0	Sust.
Plpp3	0	0.442676	0.36	0.052	0	Sust.
Rhov	0	0.442063	0.283	0.026	0	Sust.
Ackr3	0	0.442005	0.306	0.027	0	Sust.
Fam129a	0	0.441754	0.361	0.065	0	Sust.
Ctnnal1	0	0.441596	0.305	0.032	0	Sust.
Erbb3	0	0.439578	0.32	0.041	0	Sust.
Proser2	0	0.438847	0.326	0.047	0	Sust.
Jag1	0	0.437284	0.311	0.052	0	Sust.
Pkp2	0	0.436486	0.301	0.037	0	Sust.
Vangl2	0	0.436272	0.324	0.044	0	Sust.
Wnt7b	0	0.435977	0.257	0.018	0	Sust.
Gcnt1	0	0.432756	0.323	0.046	0	Sust.
4930426D05Rik	0	0.431713	0.26	0.009	0	Sust.
Ppp1r16b	0	0.430095	0.289	0.037	0	Sust.
Gk	0	0.429997	0.326	0.054	0	Sust.
Cdcp1	0	0.428355	0.311	0.044	0	Sust.
Cgn	0	0.426794	0.349	0.063	0	Sust.
Myo5c	0	0.425624	0.28	0.026	0	Sust.
Mapk11	0	0.420067	0.304	0.044	0	Sust.
Fgfr1	0	0.419564	0.339	0.048	0	Sust.
Dgat2	0	0.416586	0.285	0.034	0	Sust.
Rarb	0	0.416526	0.265	0.016	0	Sust.
Slco4c1	0	0.41419	0.309	0.049	0	Sust.
Gstm4	0	0.412826	0.252	0.026	0	Sust.
Nr2e1	0	0.412686	0.278	0.026	0	Sust.
Cdc42ep2	0	0.411612	0.266	0.025	0	Sust.
Dsel	0	0.411416	0.322	0.048	0	Sust.
Pls1	0	0.410529	0.323	0.05	0	Sust.
Slc4a11	0	0.407589	0.252	0.013	0	Sust.
Gphn	0	0.407457	0.3	0.047	0	Sust.
Plod2	0	0.405953	0.279	0.031	0	Sust.
Lzts3	0	0.401531	0.255	0.018	0	Sust.
Srgap3	0	0.40017	0.288	0.032	0	Sust.
Mgat3	0	0.399703	0.303	0.049	0	Sust.
Scarb1	0	0.392765	0.294	0.047	0	Sust.
Dok1	0	0.391431	0.263	0.036	0	Sust.
Mpv17l	0	0.389778	0.28	0.042	0	Sust.
Kitl	0	0.389223	0.352	0.058	0	Sust.
Swap70	0	0.388843	0.31	0.048	0	Sust.
Rora	0	0.387201	0.307	0.05	0	Sust.
Ttc38	0	0.378006	0.274	0.036	0	Sust.
Plagl1	0	0.368227	0.288	0.043	0	Sust.
Adamdec1	0	0.367391	0.255	0.024	0	Sust.
Efnb2	0	0.362019	0.259	0.031	0	Sust.
Gpx8	5.06074e-308	0.378767	0.276	0.042	9.81885e-304	Sust.
mt-Nd4	1.39788e-303	0.503692	1	0.996	2.71217e-299	Sust.
Dram2	4.48309e-303	0.60225	0.628	0.194	8.69809e-299	Sust.
Aldh3b1	1.10112e-300	0.543785	0.402	0.088	2.13639e-296	Sust.
Cxadr	1.53912e-300	0.567648	0.587	0.17	2.9862e-296	Sust.
Tob2	9.31987e-298	0.484481	0.447	0.106	1.80824e-293	Sust.
Pla2g16	7.64437e-296	0.472297	0.432	0.099	1.48316e-291	Sust.
Tubb2a	7.2598e-294	0.510203	0.413	0.093	1.40855e-289	Sust.
Atl2	1.87829e-290	0.486291	0.431	0.102	3.64425e-286	Sust.
Emb	2.40462e-290	0.667082	0.82	0.34	4.66544e-286	Sust.
Vamp5	4.9055e-290	0.461217	0.399	0.087	9.51764e-286	Sust.
mt-Nd2	1.79729e-289	0.608914	0.999	0.958	3.4871e-285	Sust.
Tnnt1	1.71247e-287	0.474834	0.371	0.077	3.32254e-283	Sust.
Unc119	7.16111e-286	0.583669	0.548	0.158	1.3894e-281	Sust.
Crip2	8.84537e-286	0.627336	0.686	0.234	1.71618e-281	Sust.
Zfp503	3.80036e-285	0.359789	0.282	0.047	7.37346e-281	Sust.
Ugp2	3.57772e-282	0.614096	0.638	0.211	6.94149e-278	Sust.
Slc1a4	2.07089e-280	0.362817	0.314	0.057	4.01794e-276	Sust.
Nfib	4.06003e-279	0.680901	0.779	0.322	7.87727e-275	Sust.
Rhbdd2	1.66661e-278	0.404107	0.341	0.068	3.23356e-274	Sust.
Gng5	1.66069e-276	0.68299	0.911	0.48	3.22207e-272	Sust.
Krt23	1.73778e-276	0.379462	0.357	0.073	3.37165e-272	Sust.
C1qtnf4	1.04256e-273	0.55553	0.557	0.163	2.02277e-269	Sust.
F2r	4.90154e-272	0.38663	0.341	0.069	9.50997e-268	Sust.
Phactr2	1.60564e-271	0.440682	0.404	0.094	3.11526e-267	Sust.
Sypl	1.28769e-270	0.594653	0.648	0.222	2.49839e-266	Sust.
Cldn23	1.96024e-266	0.365082	0.286	0.05	3.80327e-262	Sust.
Socs6	1.13675e-264	0.385981	0.359	0.077	2.20553e-260	Sust.
Atp7b	3.19758e-264	0.344164	0.306	0.057	6.20394e-260	Sust.
Pgap2	7.00311e-264	0.44957	0.367	0.082	1.35874e-259	Sust.
Otud1	2.11508e-262	0.328963	0.281	0.049	4.10367e-258	Sust.
Dynlt3	2.51906e-262	0.621882	0.753	0.306	4.88748e-258	Sust.
mt-Cytb	4.27087e-262	0.442021	1	0.999	8.28634e-258	Sust.
Fcgrt	1.89521e-261	0.351166	0.255	0.041	3.67709e-257	Sust.
Scgb1c1	2.07905e-261	0.784851	0.96	0.743	4.03378e-257	Sust.
Wbp5	1.30193e-260	0.691252	0.849	0.432	2.526e-256	Sust.
Foxn3	1.51768e-260	0.356099	0.305	0.058	2.94459e-256	Sust.
Spint1	1.93023e-260	0.352545	0.292	0.053	3.74504e-256	Sust.
Map1lc3a	2.28119e-258	0.824324	0.889	0.512	4.42596e-254	Sust.
Hagh	4.75682e-257	0.600151	0.626	0.216	9.22917e-253	Sust.
B4galt4	2.20328e-256	0.36931	0.295	0.056	4.27481e-252	Sust.
Cisd1	3.58276e-256	0.711989	0.874	0.458	6.95127e-252	Sust.
Smpdl3a	1.0121e-254	0.53524	0.632	0.213	1.96368e-250	Sust.
Bphl	3.67556e-254	0.584823	0.602	0.203	7.13132e-250	Sust.
Nlk	1.44097e-251	0.507263	0.535	0.161	2.79577e-247	Sust.
Shroom3	3.69223e-251	0.368556	0.348	0.075	7.16366e-247	Sust.
Csad	5.32996e-251	0.352905	0.304	0.06	1.03412e-246	Sust.
mt-Co1	6.61188e-251	0.400041	1	1	1.28284e-246	Sust.
Pcdh7	2.86009e-248	0.462286	0.545	0.163	5.54914e-244	Sust.
Tex2	4.64197e-248	0.410676	0.367	0.084	9.00635e-244	Sust.
Gtf2i	3.52294e-246	0.571687	0.62	0.219	6.83522e-242	Sust.
Amer1	3.96282e-246	0.357362	0.294	0.057	7.68867e-242	Sust.
Tmco1	2.49239e-245	0.550715	0.656	0.238	4.83573e-241	Sust.
Hsd17b11	1.46373e-244	0.539413	0.414	0.108	2.83993e-240	Sust.
Fuca2	1.51923e-244	0.461101	0.464	0.129	2.94762e-240	Sust.
Ctnnd2	2.91679e-244	0.310798	0.251	0.042	5.65915e-240	Sust.
Taldo1	5.23284e-244	0.688968	0.905	0.539	1.01528e-239	Sust.
Tef	1.11283e-242	0.438653	0.418	0.107	2.15912e-238	Sust.
Slit2	4.18154e-241	0.326566	0.283	0.054	8.11302e-237	Sust.
Zfhx3	2.17013e-240	0.569475	0.614	0.216	4.21049e-236	Sust.
Ktn1	6.09539e-240	0.639872	0.68	0.27	1.18263e-235	Sust.
Tmem159	1.81291e-239	0.416568	0.4	0.1	3.51741e-235	Sust.
Ddi2	2.00042e-239	0.502086	0.497	0.15	3.88121e-235	Sust.
Espn	1.64377e-238	0.340905	0.325	0.069	3.18924e-234	Sust.
Hist3h2a	2.12177e-237	0.541353	0.51	0.156	4.11666e-233	Sust.
Cadm1	9.72446e-237	0.591896	0.802	0.35	1.88674e-232	Sust.
Nedd4	2.22585e-235	0.55086	0.69	0.261	4.31859e-231	Sust.
Irf6	3.38197e-235	0.366348	0.398	0.098	6.5617e-231	Sust.
Cdk6	4.02517e-235	0.442492	0.441	0.122	7.80963e-231	Sust.
Blnk	7.35042e-235	0.323189	0.292	0.058	1.42613e-230	Sust.
Pi4ka	2.17294e-232	0.358381	0.335	0.075	4.21594e-228	Sust.
Baiap2l1	5.19625e-231	0.345589	0.308	0.065	1.00818e-226	Sust.
Pard3	1.40093e-228	0.411885	0.42	0.112	2.71809e-224	Sust.
mt-Nd5	1.01911e-226	0.545002	0.974	0.783	1.97729e-222	Sust.
Faah	1.11813e-226	0.395739	0.41	0.108	2.16939e-222	Sust.
Sfn	2.61467e-224	0.321156	0.252	0.046	5.07298e-220	Sust.
Pon2	1.22619e-220	0.545291	0.631	0.238	2.37906e-216	Sust.
Sipa1l3	4.27927e-218	0.312854	0.278	0.056	8.30265e-214	Sust.
Eif2b3	5.65208e-217	0.476839	0.298	0.066	1.09662e-212	Sust.
Spr	5.79579e-217	0.376787	0.336	0.08	1.1245e-212	Sust.
Bbx	9.80761e-217	0.437332	0.427	0.121	1.90287e-212	Sust.
Pcdh17	2.28514e-216	0.467435	0.561	0.187	4.43363e-212	Sust.
Arrdc3	1.14155e-213	0.45013	0.491	0.152	2.21484e-209	Sust.
Mthfd1	1.2639e-212	0.359937	0.263	0.053	2.45222e-208	Sust.
Slc25a25	1.27686e-212	0.356183	0.278	0.058	2.47737e-208	Sust.
Shtn1	6.75625e-212	0.353193	0.333	0.079	1.31085e-207	Sust.
Basp1	5.89202e-211	0.434781	0.518	0.165	1.14317e-206	Sust.
Mocs2	9.11764e-211	0.511121	0.542	0.187	1.769e-206	Sust.
Ddr1	3.42812e-210	0.329244	0.297	0.065	6.65123e-206	Sust.
Rbbp9	3.72041e-210	0.299661	0.27	0.055	7.21835e-206	Sust.
Cebpzos	2.98963e-209	0.626232	0.557	0.203	5.80049e-205	Sust.
Nfia	8.04337e-209	0.431263	0.442	0.129	1.56057e-204	Sust.
Zbtb18	2.98422e-208	0.387468	0.386	0.104	5.78998e-204	Sust.
Urod	1.61539e-207	0.441326	0.447	0.136	3.13419e-203	Sust.
Lgr4	1.8289e-207	0.373508	0.351	0.087	3.54844e-203	Sust.
Pdgfa	4.06999e-206	0.331228	0.385	0.101	7.89659e-202	Sust.
Lpp	1.31792e-205	0.321799	0.286	0.062	2.55702e-201	Sust.
Rab11fip1	1.97202e-205	0.325917	0.34	0.083	3.82612e-201	Sust.
Socs2	1.04338e-204	0.364606	0.577	0.196	2.02437e-200	Sust.
Ddrgk1	1.12283e-204	0.544492	0.715	0.304	2.17851e-200	Sust.
Osbp	2.71005e-204	0.355192	0.35	0.088	5.25803e-200	Sust.
Svopl	4.04476e-204	0.463325	0.281	0.061	7.84765e-200	Sust.
Tmem123	4.23869e-204	0.40098	0.415	0.119	8.22391e-200	Sust.
Ptpn3	5.05863e-204	0.311862	0.311	0.072	9.81475e-200	Sust.
Dcaf11	7.34779e-204	0.499875	0.592	0.215	1.42562e-199	Sust.
Pkp4	6.32663e-202	0.367143	0.388	0.106	1.22749e-197	Sust.
Zfhx4	1.39933e-201	0.342439	0.32	0.077	2.71497e-197	Sust.
Cib1	2.00176e-201	0.581606	0.686	0.296	3.88381e-197	Sust.
Gpc1	5.63711e-201	0.354501	0.298	0.069	1.09371e-196	Sust.
Amfr	2.2343e-199	0.420171	0.495	0.16	4.33498e-195	Sust.
Rac3	5.96265e-199	0.355171	0.351	0.09	1.15687e-194	Sust.
Hmgxb4	9.88659e-199	0.330199	0.309	0.073	1.9182e-194	Sust.
Foxo1	1.44058e-198	0.336648	0.309	0.073	2.79501e-194	Sust.
Tbcel	1.47204e-198	0.338365	0.327	0.08	2.85605e-194	Sust.
Ppa1	3.12573e-197	0.427678	0.796	0.376	6.06453e-193	Sust.
Lrrfip1	3.69356e-196	0.397654	0.43	0.13	7.16625e-192	Sust.
1500011K16Rik	1.91875e-193	0.490545	0.559	0.206	3.72276e-189	Sust.
Tapt1	7.92204e-193	0.333551	0.316	0.077	1.53703e-188	Sust.
Cbr1	2.45073e-192	0.484418	0.553	0.198	4.75491e-188	Sust.
Gk5	4.93828e-192	0.537207	0.492	0.165	9.58125e-188	Sust.
Tma7	9.31939e-192	0.571603	0.928	0.641	1.80815e-187	Sust.
Acadl	1.60477e-191	0.351601	0.328	0.084	3.11357e-187	Sust.
Sult1c1	1.33534e-189	1.52129	0.487	0.181	2.59083e-185	Sust.
Stard10	8.26899e-189	0.34851	0.358	0.097	1.60435e-184	Sust.
Sqstm1	2.26485e-188	0.408939	0.46	0.147	4.39426e-184	Sust.
Arhgap32	3.77359e-188	0.313337	0.306	0.074	7.32153e-184	Sust.
Epcam	6.27704e-187	0.471161	0.926	0.544	1.21787e-182	Sust.
Mob1b	1.05736e-186	0.375278	0.408	0.121	2.05148e-182	Sust.
Anxa2	2.24803e-186	0.368431	0.635	0.238	4.36163e-182	Sust.
Tspan13	3.28552e-185	0.542416	0.818	0.437	6.37457e-181	Sust.
Plcb4	2.55423e-184	0.300442	0.313	0.078	4.95572e-180	Sust.
Dnajc6	3.29132e-184	0.295461	0.26	0.057	6.38582e-180	Sust.
Scp2	1.03477e-183	0.534903	0.9	0.574	2.00767e-179	Sust.
Lman1	1.49924e-180	0.36806	0.383	0.113	2.90882e-176	Sust.
Fzd3	2.0113e-180	0.275308	0.255	0.056	3.90232e-176	Sust.
Il17rd	2.1461e-180	0.313114	0.261	0.059	4.16385e-176	Sust.
Cdv3	2.87163e-178	0.452226	0.524	0.191	5.57154e-174	Sust.
Tmem53	3.63032e-177	0.328165	0.316	0.081	7.04355e-173	Sust.
Etfb	6.14807e-176	0.49977	0.618	0.255	1.19285e-171	Sust.
Rab4a	1.24676e-175	0.28837	0.251	0.055	2.41897e-171	Sust.
Rspry1	3.99178e-175	0.327486	0.32	0.085	7.74484e-171	Sust.
Serpinb6a	2.31181e-174	0.367002	0.439	0.141	4.48538e-170	Sust.
Tjp1	4.42188e-174	0.305133	0.294	0.074	8.57933e-170	Sust.
Bsg	1.69865e-172	0.515049	0.928	0.653	3.29572e-168	Sust.
P4hb	5.90015e-172	0.42407	0.549	0.207	1.14475e-167	Sust.
Cnn2	5.93711e-172	0.345642	0.516	0.179	1.15192e-167	Sust.
H2afj	2.56381e-171	0.51191	0.831	0.436	4.9743e-167	Sust.
Nrbp2	3.88359e-171	0.321728	0.367	0.106	7.53494e-167	Sust.
Fmnl2	3.97289e-170	0.315814	0.342	0.095	7.7082e-166	Sust.
Dsp	7.20679e-170	0.308975	0.379	0.111	1.39826e-165	Sust.
Nr1d2	2.07772e-169	0.281413	0.29	0.072	4.0312e-165	Sust.
St3gal5	6.80831e-169	0.304179	0.488	0.169	1.32095e-164	Sust.
Ythdf2	1.27147e-168	0.38001	0.374	0.114	2.46691e-164	Sust.
Acox1	1.98573e-168	0.296206	0.314	0.083	3.85271e-164	Sust.
Mpst	2.86368e-168	0.432398	0.454	0.157	5.55612e-164	Sust.
Serf2	9.16255e-168	0.473031	0.969	0.779	1.77772e-163	Sust.
Sqle	1.24586e-167	0.349997	0.367	0.109	2.41722e-163	Sust.
2210013O21Rik	7.30098e-167	0.371928	0.37	0.113	1.41654e-162	Sust.
Sdk1	1.93576e-166	0.313805	0.348	0.098	3.75577e-162	Sust.
Stim2	7.03593e-165	0.323524	0.339	0.097	1.36511e-160	Sust.
Srp14	2.75581e-164	0.493963	0.884	0.561	5.34682e-160	Sust.
Robo1	4.28902e-163	0.253114	0.254	0.059	8.32156e-159	Sust.
Dstn	4.73183e-163	0.453193	0.94	0.693	9.1807e-159	Sust.
Suclg2	9.06968e-163	0.288118	0.298	0.079	1.7597e-158	Sust.
Hmgn1	2.92896e-162	0.440968	0.872	0.5	5.68278e-158	Sust.
Setd7	6.0456e-161	0.307656	0.357	0.105	1.17297e-156	Sust.
Ano6	2.44462e-159	0.275374	0.268	0.067	4.74305e-155	Sust.
Bag5	3.07965e-159	0.317151	0.291	0.078	5.97514e-155	Sust.
Rnf13	7.47283e-158	0.351915	0.418	0.138	1.44988e-153	Sust.
Tmbim6	1.22039e-157	0.367305	0.959	0.729	2.36779e-153	Sust.
Sms	1.61815e-157	0.442877	0.605	0.256	3.13954e-153	Sust.
Serp1	1.44938e-156	0.525352	0.813	0.459	2.81209e-152	Sust.
Pip4k2a	2.4438e-154	0.314045	0.309	0.087	4.74145e-150	Sust.
Prkci	7.47865e-154	0.273985	0.301	0.082	1.45101e-149	Sust.
Nceh1	8.25873e-154	0.317283	0.363	0.111	1.60236e-149	Sust.
Cdpf1	1.48932e-152	0.363551	0.404	0.134	2.88957e-148	Sust.
Cep170b	2.83727e-152	0.358769	0.377	0.121	5.50487e-148	Sust.
Card19	3.48008e-152	0.358643	0.427	0.146	6.75204e-148	Sust.
Amotl1	1.09658e-151	0.250861	0.269	0.069	2.12758e-147	Sust.
Apopt1	2.35146e-151	0.362971	0.426	0.148	4.5623e-147	Sust.
Fkbp4	2.50984e-151	0.451532	0.723	0.343	4.8696e-147	Sust.
Xrcc5	4.7821e-150	0.261764	0.264	0.068	9.27822e-146	Sust.
Diaph1	1.79439e-149	0.349897	0.391	0.13	3.48147e-145	Sust.
BC026585	6.73356e-149	0.252231	0.254	0.064	1.30645e-144	Sust.
Syap1	1.63249e-148	0.347044	0.4	0.133	3.16735e-144	Sust.
Pcbp4	8.61879e-148	0.2747	0.294	0.081	1.67222e-143	Sust.
Gnas	1.17493e-147	0.396756	0.818	0.432	2.27961e-143	Sust.
Herc3	3.84574e-147	0.262874	0.328	0.095	7.4615e-143	Sust.
Tbca	1.8388e-146	0.486997	0.879	0.565	3.56765e-142	Sust.
Cttn	9.15341e-146	0.313834	0.398	0.132	1.77594e-141	Sust.
Tmem55a	1.5725e-145	0.293526	0.288	0.081	3.05096e-141	Sust.
Sacm1l	3.75377e-145	0.305878	0.36	0.114	7.28306e-141	Sust.
Mllt4	3.83398e-145	0.326669	0.403	0.136	7.43868e-141	Sust.
Bri3	1.45935e-144	0.470994	0.804	0.443	2.83144e-140	Sust.
Efcab14	2.52259e-144	0.341582	0.434	0.154	4.89433e-140	Sust.
Ost4	2.76583e-144	0.500804	0.804	0.46	5.36626e-140	Sust.
Pink1	2.83331e-144	0.362149	0.471	0.174	5.49719e-140	Sust.
Klhl21	3.06762e-144	0.259369	0.251	0.064	5.9518e-140	Sust.
Sel1l	2.62496e-142	0.361066	0.47	0.177	5.09295e-138	Sust.
Nampt	6.96358e-142	0.409658	0.377	0.128	1.35107e-137	Sust.
Rab25	1.01098e-141	0.339338	0.449	0.162	1.9615e-137	Sust.
Zfand6	1.28713e-141	0.424413	0.6	0.265	2.49729e-137	Sust.
Slc44a1	4.64862e-141	0.274198	0.31	0.091	9.01925e-137	Sust.
Osbpl6	6.22829e-141	0.265711	0.269	0.072	1.20841e-136	Sust.
Smim22	4.75498e-140	0.372669	0.607	0.256	9.22562e-136	Sust.
Dnase2a	1.45931e-139	0.256638	0.285	0.08	2.83136e-135	Sust.
Pnkd	3.49514e-138	0.338556	0.411	0.146	6.78128e-134	Sust.
Tpgs2	1.45823e-136	0.290218	0.298	0.088	2.82925e-132	Sust.
Sri	3.32887e-136	0.396041	0.655	0.297	6.45867e-132	Sust.
mt-Nd1	4.41604e-136	0.261907	1	0.999	8.56801e-132	Sust.
Dcaf8	1.02987e-135	0.326064	0.46	0.173	1.99816e-131	Sust.
Bcl6	1.98735e-135	0.273099	0.287	0.082	3.85585e-131	Sust.
Tmbim4	7.12518e-135	0.394139	0.548	0.231	1.38243e-130	Sust.
Lpcat3	2.54051e-133	0.270469	0.253	0.069	4.92909e-129	Sust.
Enah	5.33885e-133	0.377365	0.612	0.27	1.03584e-128	Sust.
Rab3ip	9.01121e-132	0.296644	0.376	0.128	1.74835e-127	Sust.
Sgk1	2.0604e-131	0.29192	0.365	0.121	3.99759e-127	Sust.
Pttg1ip	2.28305e-131	0.296034	0.329	0.105	4.42956e-127	Sust.
Acaa1a	2.51146e-131	0.318976	0.408	0.147	4.87273e-127	Sust.
Insr	3.87369e-131	0.294046	0.34	0.11	7.51574e-127	Sust.
Ybx3	4.41006e-131	0.365399	0.458	0.179	8.55639e-127	Sust.
Tmem238	8.29857e-130	0.308385	0.37	0.128	1.61009e-125	Sust.
Avl9	3.09776e-129	0.259725	0.331	0.105	6.01027e-125	Sust.
Anxa7	5.71007e-129	0.295458	0.428	0.158	1.10787e-124	Sust.
Sptbn1	8.90298e-128	0.387165	0.695	0.346	1.72736e-123	Sust.
Nr2f6	1.37551e-126	0.264057	0.314	0.099	2.66877e-122	Sust.
Maged1	1.42534e-126	0.292866	0.454	0.172	2.76544e-122	Sust.
Slmap	4.21839e-126	0.292264	0.357	0.122	8.18452e-122	Sust.
Drap1	4.71573e-126	0.322409	0.44	0.169	9.14946e-122	Sust.
Amd1	4.87893e-126	0.311451	0.38	0.135	9.46611e-122	Sust.
Acsl1	7.3699e-126	0.260678	0.292	0.09	1.42991e-121	Sust.
Mrps28	2.6544e-125	0.330817	0.401	0.148	5.15006e-121	Sust.
Rtn3	2.86763e-124	0.420949	0.789	0.457	5.56377e-120	Sust.
mt-Atp6	3.25768e-124	0.268373	1	1	6.32056e-120	Sust.
Vgll4	4.92828e-124	0.258319	0.327	0.106	9.56184e-120	Sust.
Rpia	1.01399e-123	0.273883	0.318	0.103	1.96735e-119	Sust.
Nbeal1	1.06527e-123	0.276219	0.408	0.148	2.06683e-119	Sust.
Phpt1	1.18529e-123	0.316908	0.358	0.125	2.2997e-119	Sust.
Zrsr2	3.91988e-123	0.293297	0.374	0.133	7.60536e-119	Sust.
Eif4g1	8.92133e-122	0.339827	0.49	0.201	1.73092e-117	Sust.
Vcp	1.07744e-121	0.423396	0.773	0.444	2.09045e-117	Sust.
Gipc1	1.20577e-121	0.330136	0.397	0.148	2.33943e-117	Sust.
Lamp2	1.26013e-121	0.365088	0.639	0.301	2.4449e-117	Sust.
Runx1	1.53023e-121	0.308108	0.402	0.15	2.96895e-117	Sust.
Akap13	1.76323e-121	0.319094	0.522	0.219	3.42101e-117	Sust.
Kat2b	6.20532e-121	0.29726	0.441	0.168	1.20396e-116	Sust.
C530008M17Rik	3.402e-120	0.254906	0.378	0.133	6.60056e-116	Sust.
Cbx5	5.84992e-120	0.300355	0.387	0.143	1.135e-115	Sust.
Ccs	1.32902e-119	0.286773	0.334	0.114	2.57857e-115	Sust.
Faap20	3.06017e-119	0.274165	0.266	0.08	5.93734e-115	Sust.
Rasa2	7.0191e-119	0.264861	0.29	0.091	1.36185e-114	Sust.
Wwc1	1.26183e-118	0.299709	0.432	0.166	2.4482e-114	Sust.
Plscr1	4.48207e-118	0.259355	0.292	0.093	8.69611e-114	Sust.
Rps27l	8.54205e-118	0.400871	0.893	0.606	1.65733e-113	Sust.
Impa1	4.46772e-116	0.2808	0.417	0.159	8.66827e-112	Sust.
Agpat3	9.38262e-116	0.288536	0.443	0.172	1.82042e-111	Sust.
Tvp23b	1.3973e-115	0.313336	0.462	0.187	2.71105e-111	Sust.
1810022K09Rik	1.42967e-115	0.338936	0.537	0.235	2.77384e-111	Sust.
Chchd7	2.2143e-115	0.302923	0.397	0.151	4.29618e-111	Sust.
Sod2	2.40232e-114	0.371266	0.652	0.322	4.66099e-110	Sust.
Elf1	3.91123e-114	0.258958	0.385	0.143	7.58857e-110	Sust.
Ddt	1.01407e-113	0.313403	0.381	0.143	1.9675e-109	Sust.
Pcbd2	1.47428e-112	0.304494	0.374	0.14	2.86039e-108	Sust.
Nek7	2.12115e-112	0.278139	0.395	0.149	4.11546e-108	Sust.
Clip1	8.92125e-112	0.251339	0.32	0.11	1.7309e-107	Sust.
Mlec	1.81305e-111	0.261771	0.325	0.113	3.51768e-107	Sust.
Ccdc47	4.28073e-110	0.295583	0.461	0.189	8.30548e-106	Sust.
Endod1	2.92982e-109	0.253242	0.593	0.261	5.68443e-105	Sust.
Wnk1	3.02202e-109	0.370907	0.667	0.347	5.86332e-105	Sust.
Pbx1	7.00999e-109	0.355277	0.57	0.266	1.36008e-104	Sust.
Cstb	9.44481e-109	0.446993	0.725	0.403	1.83248e-104	Sust.
F11r	1.06138e-107	0.291427	0.503	0.216	2.05929e-103	Sust.
Fam134a	1.72942e-107	0.285879	0.438	0.176	3.35543e-103	Sust.
Naca	4.62747e-107	0.351212	0.947	0.769	8.97822e-103	Sust.
Hist1h2bc	1.27667e-106	0.386388	0.692	0.361	2.477e-102	Sust.
Bcap31	1.3733e-106	0.373471	0.634	0.316	2.66448e-102	Sust.
Tmem59	1.54936e-106	0.389529	0.885	0.627	3.00606e-102	Sust.
Cd9	1.58963e-105	0.400951	0.918	0.672	3.0842e-101	Sust.
Ide	1.98034e-105	0.278427	0.402	0.159	3.84225e-101	Sust.
Cldn3	2.73133e-105	0.286061	0.65	0.308	5.29933e-101	Sust.
Rps20	4.20624e-105	0.309792	0.966	0.78	8.16095e-101	Sust.
Fam213a	5.68113e-105	0.293804	0.712	0.361	1.10225e-100	Sust.
Atp6v0e	2.32471e-104	0.341338	0.695	0.36	4.51041e-100	Sust.
Cmpk1	4.55764e-103	0.401248	0.789	0.479	8.84274e-99	Sust.
Atp6v1a	8.97486e-103	0.355329	0.661	0.343	1.7413e-98	Sust.
1110038F14Rik	9.92031e-103	0.27241	0.367	0.141	1.92474e-98	Sust.
Fam3c	3.00075e-102	0.261417	0.384	0.149	5.82205e-98	Sust.
Mapk1ip1l	3.13266e-102	0.25371	0.335	0.124	6.07798e-98	Sust.
Bola3	4.52472e-102	0.322346	0.542	0.25	8.77887e-98	Sust.
Reep3	1.99758e-101	0.253907	0.393	0.155	3.87571e-97	Sust.
Kdelr1	3.00617e-100	0.282039	0.358	0.139	5.83258e-96	Sust.
Adss	4.78094e-100	0.256555	0.398	0.161	9.27599e-96	Sust.
Rdx	2.893e-99	0.299302	0.47	0.207	5.61299e-95	Sust.
Carkd	3.38057e-99	0.287414	0.455	0.195	6.55898e-95	Sust.
Snx3	9.43572e-99	0.357088	0.692	0.37	1.83072e-94	Sust.
Nenf	1.41144e-98	0.266035	0.516	0.23	2.73847e-94	Sust.
Pigp	3.32575e-98	0.30932	0.639	0.315	6.45261e-94	Sust.
Glrx5	9.00487e-98	0.33532	0.669	0.353	1.74712e-93	Sust.
Hibadh	3.2955e-97	0.260214	0.393	0.159	6.39392e-93	Sust.
Svbp	1.13762e-95	0.289375	0.426	0.181	2.20722e-91	Sust.
Irf2	1.89266e-95	0.253349	0.357	0.138	3.67215e-91	Sust.
Atp6v1g1	3.94147e-95	0.359267	0.921	0.726	7.64724e-91	Sust.
Hook3	7.37697e-95	0.256976	0.349	0.135	1.43128e-90	Sust.
Nin	1.01113e-94	0.338523	0.525	0.25	1.96178e-90	Sust.
Uqcr11	1.87391e-94	0.346359	0.943	0.744	3.63576e-90	Sust.
Pdia6	2.00523e-93	0.270787	0.566	0.268	3.89054e-89	Sust.
Irf2bp2	2.53673e-93	0.310307	0.596	0.294	4.92176e-89	Sust.
Cux1	8.16013e-93	0.251407	0.389	0.16	1.58323e-88	Sust.
Dnajc3	8.22721e-93	0.261058	0.441	0.191	1.59624e-88	Sust.
Polr2m	1.31347e-91	0.27975	0.489	0.224	2.5484e-87	Sust.
Abcc5	1.22399e-90	0.274543	0.272	0.096	2.37478e-86	Sust.
Mrpl52	4.04724e-90	0.324435	0.738	0.414	7.85245e-86	Sust.
Pura	5.39515e-90	0.299314	0.548	0.266	1.04677e-85	Sust.
Tmem160	2.34669e-89	0.277518	0.538	0.257	4.55306e-85	Sust.
Vapa	5.26441e-89	0.411515	0.786	0.498	1.0214e-84	Sust.
Xbp1	1.38747e-88	0.276394	0.458	0.207	2.69197e-84	Sust.
Spag7	1.7254e-88	0.287321	0.486	0.226	3.34762e-84	Sust.
Smim10l1	1.44566e-86	0.263111	0.53	0.252	2.80487e-82	Sust.
Uqcrh	2.80105e-86	0.290932	0.957	0.846	5.4346e-82	Sust.
Limd2	4.07182e-85	0.265639	0.499	0.234	7.90015e-81	Sust.
Gnb2	4.70368e-84	0.262134	0.652	0.337	9.12609e-80	Sust.
Apoa1bp	7.21913e-84	0.286439	0.475	0.223	1.40066e-79	Sust.
Mrpl14	1.29906e-83	0.322381	0.641	0.342	2.52044e-79	Sust.
Rabac1	1.60561e-83	0.333448	0.79	0.502	3.1152e-79	Sust.
Lamtor2	2.57051e-83	0.34948	0.778	0.471	4.9873e-79	Sust.
Aamp	4.36564e-83	0.2619	0.541	0.264	8.47022e-79	Sust.
mt-Nd4l	1.30319e-82	0.366295	0.9	0.663	2.52845e-78	Sust.
Hypk	2.27069e-82	0.319236	0.473	0.228	4.40559e-78	Sust.
Pole4	2.98562e-82	0.270392	0.432	0.198	5.79269e-78	Sust.
Capns1	1.19165e-80	0.283444	0.594	0.306	2.31204e-76	Sust.
Ndufs5	1.5995e-79	0.329859	0.786	0.509	3.10334e-75	Sust.
Nfat5	9.9751e-79	0.25595	0.542	0.266	1.93537e-74	Sust.
Csde1	1.77399e-78	0.30852	0.714	0.421	3.4419e-74	Sust.
Tm2d1	5.64272e-78	0.256558	0.49	0.236	1.0948e-73	Sust.
Rer1	1.01925e-74	0.300838	0.667	0.376	1.97755e-70	Sust.
Chmp5	1.29193e-73	0.27125	0.596	0.319	2.5066e-69	Sust.
St13	1.06618e-72	0.26273	0.612	0.327	2.0686e-68	Sust.
Pcm1	1.57542e-71	0.255842	0.517	0.262	3.05662e-67	Sust.
Myl12a	4.08758e-71	0.283041	0.738	0.441	7.93072e-67	Sust.
Mien1	6.45854e-71	0.291667	0.732	0.432	1.25309e-66	Sust.
Anapc13	7.46315e-71	0.315233	0.791	0.506	1.448e-66	Sust.
Zc3h15	3.93084e-70	0.258188	0.572	0.304	7.62662e-66	Sust.
Iscu	2.06879e-69	0.267761	0.706	0.417	4.01387e-65	Sust.
Abhd2	8.15543e-69	0.316446	0.367	0.168	1.58232e-64	Sust.
Smdt1	2.50062e-68	0.288997	0.874	0.626	4.85169e-64	Sust.
Myl12b	1.69782e-67	0.286075	0.71	0.421	3.29411e-63	Sust.
Psma7	2.37979e-67	0.269717	0.893	0.652	4.61727e-63	Sust.
Psmb2	3.42115e-67	0.320584	0.755	0.47	6.63771e-63	Sust.
Alkbh5	2.5437e-66	0.254176	0.398	0.189	4.93529e-62	Sust.
Pcnp	2.8608e-66	0.253825	0.54	0.285	5.55053e-62	Sust.
Psmb6	3.87775e-65	0.296822	0.796	0.521	7.5236e-61	Sust.
2410015M20Rik	5.10331e-65	0.290706	0.722	0.442	9.90144e-61	Sust.
Ralbp1	1.36008e-64	0.283103	0.669	0.402	2.63882e-60	Sust.
Pomp	1.48267e-64	0.285709	0.864	0.605	2.87667e-60	Sust.
Rbx1	1.76345e-62	0.276909	0.868	0.609	3.42145e-58	Sust.
Sh3bgrl	8.89458e-62	0.252151	0.753	0.474	1.72573e-57	Sust.
Anp32a	1.06903e-61	0.256945	0.693	0.409	2.07414e-57	Sust.
Morf4l1	6.90615e-60	0.264425	0.88	0.638	1.33993e-55	Sust.
Fus	4.11644e-58	0.278889	0.698	0.443	7.98673e-54	Sust.
Atp6v1f	1.39409e-56	0.260082	0.777	0.519	2.70481e-52	Sust.
Psmb1	2.86993e-53	0.257095	0.814	0.565	5.56824e-49	Sust.
Srrm2	1.86227e-51	0.256087	0.768	0.53	3.61317e-47	Sust.
Jun	6.78596e-33	0.250065	0.539	0.35	1.31661e-28	Sust.
Sparc	0	3.77213	0.945	0.078	0	Str.
Col3a1	0	2.84511	0.314	0.016	0	Str.
Ibsp	0	2.57663	0.262	0.01	0	Str.
Lum	0	2.23597	0.409	0.017	0	Str.
Igfbp7	0	2.15379	0.604	0.062	0	Str.
Timp3	0	2.10917	0.649	0.069	0	Str.
Bgn	0	2.10262	0.668	0.013	0	Str.
Id3	0	2.02603	0.695	0.091	0	Str.
Postn	0	2.00752	0.341	0.007	0	Str.
Igfbp4	0	1.86161	0.613	0.07	0	Str.
Serpinh1	0	1.81288	0.628	0.048	0	Str.
Col11a1	0	1.80109	0.47	0.009	0	Str.
Col5a2	0	1.72395	0.421	0.009	0	Str.
Col11a2	0	1.6783	0.262	0.009	0	Str.
Sparcl1	0	1.65889	0.338	0.006	0	Str.
Serpinf1	0	1.59916	0.378	0.019	0	Str.
Fxyd1	0	1.58673	0.537	0.011	0	Str.
Cfh	0	1.58035	0.372	0.024	0	Str.
S100b	0	1.54127	0.348	0.011	0	Str.
Fstl1	0	1.42938	0.39	0.01	0	Str.
Tnc	0	1.42576	0.259	0.007	0	Str.
Pcolce	0	1.35953	0.39	0.016	0	Str.
Mmp2	0	1.34221	0.36	0.016	0	Str.
Col6a1	0	1.32287	0.32	0.007	0	Str.
Cdh11	0	1.24704	0.341	0.007	0	Str.
Ccdc80	0	1.23769	0.317	0.01	0	Str.
Rcn3	0	1.18259	0.363	0.009	0	Str.
Rarres2	0	1.09	0.253	0.002	0	Str.
Prkcdbp	0	1.05063	0.299	0.01	0	Str.
Islr	0	1.02841	0.28	0.002	0	Str.
Col6a2	0	1.01905	0.262	0.005	0	Str.
Col12a1	0	1.00963	0.253	0.006	0	Str.
Htra1	0	0.999622	0.268	0.003	0	Str.
Col5a1	0	0.971394	0.262	0.006	0	Str.
Aebp1	0	0.906465	0.274	0.005	0	Str.
Mxra8	0	0.86306	0.271	0.003	0	Str.
Hspg2	3.69241e-299	0.862698	0.265	0.012	7.16401e-295	Str.
Cd200	6.81436e-276	1.25908	0.409	0.034	1.32212e-271	Str.
Ppic	3.81051e-259	1.12105	0.399	0.035	7.39315e-255	Str.
Mgp	9.98818e-253	3.75578	0.393	0.035	1.93791e-248	Str.
Col1a2	5.87155e-252	4.23508	0.668	0.113	1.1392e-247	Str.
Snhg18	9.86045e-252	0.953427	0.284	0.017	1.91312e-247	Str.
Fgfr1	1.82935e-250	1.39517	0.503	0.059	3.5493e-246	Str.
Cald1	1.28631e-243	1.53868	0.527	0.066	2.4957e-239	Str.
Atp1a2	9.31693e-240	1.7423	0.296	0.02	1.80767e-235	Str.
Gpx3	3.85939e-234	2.16741	0.348	0.029	7.48799e-230	Str.
Lrp1	2.0681e-208	1.06617	0.396	0.042	4.01254e-204	Str.
Gja1	1.65486e-196	1.16197	0.357	0.036	3.21076e-192	Str.
Col1a1	3.15009e-164	4.33891	0.564	0.117	6.11181e-160	Str.
Lox	2.18044e-160	0.92603	0.256	0.023	4.2305e-156	Str.
Fcgrt	7.77509e-152	0.901761	0.372	0.05	1.50852e-147	Str.
Scd1	1.12943e-143	1.64776	0.29	0.032	2.19133e-139	Str.
Copz2	9.76405e-143	0.746099	0.28	0.03	1.89442e-138	Str.
Ahnak	2.19478e-135	1.0294	0.549	0.112	4.25832e-131	Str.
Fn1	1.24228e-125	1.58355	0.402	0.068	2.41026e-121	Str.
Fkbp9	3.76303e-121	0.706748	0.293	0.038	7.30103e-117	Str.
Plpp3	2.23868e-118	1.5551	0.378	0.066	4.34349e-114	Str.
Ptprd	2.2594e-118	0.95069	0.274	0.035	4.38369e-114	Str.
Zbtb20	7.48401e-112	1.33638	0.726	0.267	1.45205e-107	Str.
Aqp1	8.09645e-112	1.27346	0.256	0.032	1.57087e-107	Str.
Gpx8	1.1316e-109	0.833422	0.326	0.052	2.19554e-105	Str.
Ndrg2	2.73599e-99	1.10431	0.351	0.065	5.30837e-95	Str.
Lmna	1.12088e-97	0.843309	0.332	0.059	2.17474e-93	Str.
Fabp7	2.02122e-97	2.96397	0.259	0.038	3.92157e-93	Str.
Timp2	1.84792e-96	1.1597	0.582	0.177	3.58534e-92	Str.
Bglap	1.85307e-94	4.26503	0.271	0.042	3.59532e-90	Str.
Dcn	9.43681e-94	1.72541	0.442	0.105	1.83093e-89	Str.
Maf	5.18849e-92	0.817853	0.29	0.047	1.00667e-87	Str.
Gsn	3.11969e-78	1.34127	0.585	0.212	6.05282e-74	Str.
Laptm4a	2.89219e-73	0.921587	0.784	0.417	5.61143e-69	Str.
Igfbp5	5.50505e-72	1.9382	0.5	0.17	1.06809e-67	Str.
Calu	1.97617e-70	0.753419	0.338	0.079	3.83417e-66	Str.
Ccnd2	4.72157e-70	0.695404	0.348	0.079	9.16079e-66	Str.
Tpm1	3.35761e-68	1.43123	0.494	0.171	6.51443e-64	Str.
Oat	1.86234e-67	0.788289	0.396	0.107	3.61332e-63	Str.
Sepp1	7.04738e-67	0.872382	0.433	0.124	1.36733e-62	Str.
Zeb2	7.80714e-67	0.712502	0.354	0.085	1.51474e-62	Str.
Scd2	6.37541e-65	1.45252	0.509	0.184	1.23696e-60	Str.
Lgals1	1.52178e-62	1.06599	0.497	0.168	2.95256e-58	Str.
Cd63	2.1786e-60	1.06166	0.701	0.339	4.22691e-56	Str.
Clic4	1.62758e-57	0.694564	0.32	0.082	3.15783e-53	Str.
Mef2c	1.12698e-56	0.981489	0.357	0.101	2.18656e-52	Str.
S100a16	7.44345e-56	0.683783	0.332	0.089	1.44418e-51	Str.
Nedd4	8.98883e-54	0.754385	0.622	0.282	1.74401e-49	Str.
Itgb1	1.16265e-53	0.801316	0.503	0.197	2.25578e-49	Str.
Rhoc	5.89292e-53	0.651411	0.366	0.107	1.14334e-48	Str.
Spp1	4.01849e-49	4.32833	0.311	0.092	7.79668e-45	Str.
Pik3r1	6.76145e-49	0.76331	0.375	0.121	1.31186e-44	Str.
Rrbp1	9.4091e-49	0.843579	0.54	0.239	1.82555e-44	Str.
Fndc3b	5.36078e-45	0.553178	0.253	0.063	1.0401e-40	Str.
Cryab	2.55363e-44	1.15029	0.308	0.093	4.95456e-40	Str.
Tns3	4.4037e-44	0.676405	0.302	0.089	8.54405e-40	Str.
Dab2	5.21626e-44	0.588731	0.256	0.066	1.01206e-39	Str.
Vim	2.9223e-42	0.866338	0.543	0.242	5.66984e-38	Str.
Cst3	1.04542e-39	0.682669	0.796	0.555	2.02832e-35	Str.
Amotl1	4.55042e-37	0.539139	0.265	0.078	8.82872e-33	Str.
Tcf4	1.18467e-36	0.791673	0.671	0.382	2.2985e-32	Str.
Rcn2	3.17907e-36	0.591179	0.357	0.132	6.16803e-32	Str.
Gnas	6.8972e-36	0.634133	0.738	0.451	1.33819e-31	Str.
Nrp2	6.64899e-35	0.883056	0.363	0.141	1.29004e-30	Str.
Lifr	1.67463e-34	0.578737	0.28	0.09	3.24911e-30	Str.
Qk	2.14955e-34	0.652566	0.369	0.146	4.17056e-30	Str.
Dbi	4.88238e-34	1.69476	0.582	0.346	9.4728e-30	Str.
Marcks	4.80191e-33	0.790446	0.582	0.324	9.31666e-29	Str.
Nudt4	1.12495e-32	0.882878	0.421	0.197	2.18263e-28	Str.
Fat1	2.16067e-32	0.646334	0.29	0.101	4.19213e-28	Str.
Pmepa1	1.36298e-31	0.698008	0.311	0.115	2.64446e-27	Str.
Zfp36l1	5.01878e-31	0.643184	0.463	0.215	9.73743e-27	Str.
Ifitm3	4.29478e-30	0.536746	0.671	0.377	8.33273e-26	Str.
Reep3	6.41047e-30	0.606179	0.381	0.166	1.24376e-25	Str.
Mdk	5.03507e-29	0.57584	0.262	0.089	9.76905e-25	Str.
S100a6	3.02986e-28	0.302079	0.689	0.383	5.87853e-24	Str.
Sh3pxd2a	5.98687e-28	0.53358	0.308	0.118	1.16157e-23	Str.
Crip1	8.74021e-28	0.771617	0.588	0.332	1.69577e-23	Str.
Apoe	8.2444e-27	1.02983	0.744	0.586	1.59958e-22	Str.
Nfic	1.03535e-25	0.475209	0.29	0.112	2.00879e-21	Str.
Ski	5.60665e-25	0.436592	0.271	0.102	1.0878e-20	Str.
Emp3	7.17888e-25	0.500769	0.387	0.172	1.39285e-20	Str.
Sec31a	1.48435e-24	0.502236	0.29	0.117	2.87994e-20	Str.
Sorbs2	4.15945e-24	0.485052	0.302	0.121	8.07016e-20	Str.
Ptn	8.53103e-24	1.17313	0.451	0.265	1.65519e-19	Str.
Flna	3.2561e-23	0.633226	0.381	0.182	6.31748e-19	Str.
mt-Co3	5.45654e-23	0.264435	1	1	1.05868e-18	Str.
mt-Cytb	1.24471e-22	0.259418	1	0.999	2.415e-18	Str.
Kctd12	1.01454e-21	0.567515	0.253	0.099	1.9684e-17	Str.
Mprip	9.22946e-21	0.495313	0.305	0.137	1.7907e-16	Str.
Slc44a1	1.22645e-20	0.421652	0.253	0.102	2.37955e-16	Str.
Tmem176a	1.23618e-20	0.432077	0.399	0.197	2.39843e-16	Str.
Ckap4	1.67793e-20	0.413232	0.296	0.125	3.25553e-16	Str.
mt-Nd4	1.14236e-19	0.265926	1	0.996	2.2164e-15	Str.
Slc25a4	1.53556e-19	0.564794	0.552	0.368	2.97929e-15	Str.
2020-09-11	2.93146e-19	0.453556	0.28	0.126	5.68762e-15	Str.
Tpm4	5.85787e-19	0.574908	0.351	0.182	1.13654e-14	Str.
Tsc22d3	8.44528e-19	0.796708	0.317	0.157	1.63855e-14	Str.
Nenf	1.2301e-18	0.541136	0.427	0.245	2.38663e-14	Str.
Rock2	1.48645e-18	0.46019	0.293	0.135	2.88402e-14	Str.
Maged1	1.51162e-18	0.4905	0.36	0.186	2.93284e-14	Str.
Sptbn1	3.58615e-18	0.583166	0.537	0.364	6.95785e-14	Str.
Pebp1	9.88077e-17	0.54541	0.497	0.315	1.91707e-12	Str.
Lrrc58	2.39513e-16	0.421468	0.314	0.16	4.64702e-12	Str.
Mxd4	9.58922e-16	0.444557	0.36	0.196	1.8605e-11	Str.
Ctsl	1.54399e-15	0.540008	0.384	0.218	2.99565e-11	Str.
Nfia	1.70294e-15	0.457109	0.29	0.145	3.30405e-11	Str.
Ptms	2.02828e-15	0.386936	0.598	0.409	3.93528e-11	Str.
Ctnnb1	2.17248e-15	0.394485	0.552	0.377	4.21505e-11	Str.
Tmem176b	2.99986e-15	0.461443	0.433	0.245	5.82033e-11	Str.
Nupr1	3.02957e-15	0.89836	0.409	0.244	5.87797e-11	Str.
Nrp1	4.45992e-15	0.606237	0.259	0.124	8.65314e-11	Str.
S100a10	8.55697e-15	0.488052	0.332	0.174	1.66022e-10	Str.
Cpe	1.44448e-14	0.568984	0.552	0.405	2.80258e-10	Str.
Crip2	3.03912e-14	0.477428	0.415	0.258	5.8965e-10	Str.
Id1	3.22616e-14	0.525535	0.29	0.148	6.2594e-10	Str.
Ifitm2	5.64608e-14	0.443661	0.588	0.412	1.09545e-09	Str.
Actn4	1.88704e-13	0.501277	0.332	0.19	3.66124e-09	Str.
Gpm6b	2.68988e-13	0.792603	0.293	0.167	5.21891e-09	Str.
Rpl22l1	4.06157e-13	0.412727	0.793	0.704	7.88025e-09	Str.
Malat1	1.46354e-12	0.386699	0.994	0.998	2.83956e-08	Str.
B2m	4.075e-12	0.318415	0.631	0.438	7.90632e-08	Str.
Ifi27	4.10579e-12	0.451531	0.302	0.171	7.96606e-08	Str.
Capns1	4.39966e-12	0.419714	0.463	0.321	8.53621e-08	Str.
Sdc2	5.75522e-12	0.386691	0.314	0.177	1.11663e-07	Str.
2020-09-02	1.61925e-11	0.389488	0.308	0.18	3.14166e-07	Str.
Rsu1	2.02808e-11	0.341867	0.253	0.134	3.93488e-07	Str.
P4hb	2.24932e-11	0.404078	0.36	0.226	4.36412e-07	Str.
Ctnna1	3.08261e-11	0.409368	0.381	0.241	5.98088e-07	Str.
Gm42418	4.34e-11	0.579602	0.695	0.558	8.42047e-07	Str.
Cnn3	4.83351e-11	0.427495	0.451	0.315	9.37797e-07	Str.
Ttc3	7.06406e-11	0.295169	0.384	0.239	1.37057e-06	Str.
Fth1	9.2276e-11	0.286276	0.982	0.974	1.79034e-06	Str.
Atp1b3	1.12677e-10	0.453717	0.305	0.181	2.18616e-06	Str.
Epb41l2	1.22788e-10	0.350124	0.271	0.152	2.38234e-06	Str.
Slc38a2	1.56601e-10	0.473987	0.268	0.156	3.03837e-06	Str.
Rdx	1.99201e-10	0.372328	0.351	0.221	3.8649e-06	Str.
Ssr3	2.03873e-10	0.391736	0.436	0.31	3.95555e-06	Str.
Kdelr2	2.25841e-10	0.417987	0.296	0.176	4.38177e-06	Str.
Rac1	4.25295e-10	0.317825	0.476	0.336	8.25157e-06	Str.
Anxa2	7.09555e-10	0.318773	0.402	0.259	1.37668e-05	Str.
Sdc4	1.04065e-09	0.314761	0.366	0.223	2.01907e-05	Str.
Gng5	1.72215e-09	0.259866	0.643	0.503	3.34131e-05	Str.
Cnn2	2.03951e-09	0.40972	0.317	0.197	3.95707e-05	Str.
Id2	5.57199e-09	0.329851	0.311	0.192	0.000108108	Str.
Itm2c	6.63498e-09	0.320348	0.348	0.223	0.000128732	Str.
Nfib	6.97183e-09	0.366079	0.488	0.347	0.000135267	Str.
Lims1	7.92933e-09	0.322727	0.28	0.172	0.000153845	Str.
Myl12a	9.20861e-09	0.398641	0.564	0.457	0.000178665	Str.
Serinc1	2.25094e-08	0.310559	0.442	0.326	0.000436728	Str.
Calr	2.50798e-08	0.327169	0.567	0.455	0.000486599	Str.
Nbeal1	3.27347e-08	0.307606	0.265	0.161	0.000635119	Str.
Tmed9	3.39483e-08	0.347436	0.454	0.35	0.000658666	Str.
Dst	3.60101e-08	0.29865	0.329	0.213	0.000698669	Str.
Morf4l2	4.8525e-08	0.318688	0.399	0.287	0.000941483	Str.
Lamp2	5.62097e-08	0.288914	0.439	0.32	0.00109058	Str.
Wls	7.04337e-08	0.302763	0.354	0.238	0.00136655	Str.
Nisch	7.63038e-08	0.327067	0.415	0.301	0.00148045	Str.
Reep5	9.44469e-08	0.273047	0.405	0.283	0.00183246	Str.
mt-Nd4l	1.00531e-07	0.297087	0.735	0.676	0.00195049	Str.
Zfp36l2	1.13641e-07	0.317181	0.274	0.171	0.00220486	Str.
Sar1a	2.03058e-07	0.310869	0.268	0.172	0.00393972	Str.
Nfat5	2.27372e-07	0.295918	0.399	0.28	0.00441148	Str.
Msn	2.57692e-07	0.296498	0.29	0.183	0.00499974	Str.
Actn1	3.48796e-07	0.359358	0.271	0.178	0.00676733	Str.
Tmco1	3.79517e-07	0.290461	0.363	0.261	0.00736339	Str.
Rgs5	0	4.18267	0.975	0.288	0	OEC
Vmo1	0	3.51947	0.934	0.34	0	OEC
Wfdc18	0	3.17614	0.956	0.575	0	OEC
Scgb1c1	0	3.13419	0.989	0.746	0	OEC
Msln	0	3.07285	0.863	0.057	0	OEC
Chil6	0	2.71799	0.85	0.068	0	OEC
Gstm5	0	2.42522	0.924	0.187	0	OEC
Agr2	0	2.27403	0.932	0.148	0	OEC
Dclk1	0	2.21392	0.891	0.148	0	OEC
Clu	0	2.17706	0.914	0.155	0	OEC
Slc5a8	0	2.09013	0.863	0.037	0	OEC
Aqp5	0	2.0505	0.904	0.13	0	OEC
Svopl	0	2.01414	0.802	0.045	0	OEC
Krt18	0	1.9892	0.983	0.314	0	OEC
Krt8	0	1.77911	0.948	0.243	0	OEC
Cyp2g1	0	1.7593	0.914	0.348	0	OEC
Gsta3	0	1.75638	0.853	0.094	0	OEC
Sult1e1	0	1.74046	0.634	0.062	0	OEC
Map1lc3a	0	1.7365	0.936	0.518	0	OEC
Cyp1a2	0	1.7141	0.724	0.086	0	OEC
Cyp2a5	0	1.70113	0.945	0.393	0	OEC
Cxcl5	0	1.66469	0.418	0.015	0	OEC
Mgst1	0	1.66311	0.979	0.36	0	OEC
Mt1	0	1.65044	0.985	0.828	0	OEC
Sult1c1	0	1.64826	0.728	0.178	0	OEC
Cxcl17	0	1.63879	0.721	0.031	0	OEC
Dbi	0	1.62559	0.93	0.326	0	OEC
Krt23	0	1.62339	0.8	0.062	0	OEC
Ces1d	0	1.56284	0.904	0.174	0	OEC
Atp6v1c2	0	1.49967	0.74	0.081	0	OEC
Mt2	0	1.49811	0.952	0.583	0	OEC
Tspan8	0	1.49116	0.745	0.054	0	OEC
Cldn10	0	1.48038	0.717	0.046	0	OEC
Prss33	0	1.47861	0.693	0.03	0	OEC
Plat	0	1.4594	0.714	0.049	0	OEC
Clic6	0	1.44914	0.837	0.119	0	OEC
Pon1	0	1.43178	0.771	0.121	0	OEC
Ganc	0	1.38976	0.707	0.068	0	OEC
Spry1	0	1.37719	0.675	0.043	0	OEC
Sftpd	0	1.37628	0.629	0.04	0	OEC
Cd81	0	1.37033	0.981	0.661	0	OEC
Rgr	0	1.34704	0.524	0.008	0	OEC
Gm16136	0	1.29946	0.715	0.07	0	OEC
Cd63	0	1.29878	0.907	0.322	0	OEC
Cyr61	0	1.29859	0.411	0.021	0	OEC
Cyb5a	0	1.29724	0.976	0.524	0	OEC
Hes1	0	1.29594	0.723	0.151	0	OEC
Ggt7	0	1.28272	0.715	0.099	0	OEC
Aqp4	0	1.27903	0.77	0.133	0	OEC
Sox9	0	1.26851	0.675	0.042	0	OEC
Slc15a2	0	1.2662	0.723	0.089	0	OEC
Anxa1	0	1.21876	0.902	0.291	0	OEC
Blvrb	0	1.2096	0.816	0.213	0	OEC
Elf5	0	1.19912	0.7	0.073	0	OEC
Wls	0	1.19297	0.822	0.217	0	OEC
Phlda1	0	1.19067	0.732	0.128	0	OEC
Ermn	0	1.17528	0.722	0.098	0	OEC
Taldo1	0	1.17366	0.939	0.546	0	OEC
Kifc3	0	1.17294	0.605	0.025	0	OEC
Crlf1	0	1.15448	0.603	0.046	0	OEC
Galm	0	1.14779	0.791	0.147	0	OEC
Csrp2	0	1.12368	0.795	0.189	0	OEC
Cldn3	0	1.12312	0.87	0.307	0	OEC
Psd3	0	1.12178	0.593	0.035	0	OEC
Tmem213	0	1.11364	0.644	0.084	0	OEC
Ly6e	0	1.11361	0.911	0.333	0	OEC
Eya1	0	1.08778	0.71	0.132	0	OEC
Qsox1	0	1.087	0.582	0.053	0	OEC
Cyp2f2	0	1.08339	0.87	0.261	0	OEC
Lypd2	0	1.08046	0.795	0.167	0	OEC
Gas1	0	1.07779	0.626	0.084	0	OEC
Cwh43	0	1.07716	0.568	0.039	0	OEC
Cdh1	0	1.06792	0.727	0.135	0	OEC
Zfp36l1	0	1.05265	0.78	0.197	0	OEC
Nrtn	0	1.03661	0.604	0.049	0	OEC
1810011O10Rik	0	1.02956	0.533	0.058	0	OEC
Atp11a	0	1.0057	0.71	0.162	0	OEC
Otx2	0	1.00318	0.661	0.112	0	OEC
Cldn7	0	0.991858	0.724	0.158	0	OEC
Tnfaip8	0	0.978261	0.671	0.132	0	OEC
Abhd14b	0	0.973077	0.599	0.093	0	OEC
Knop1	0	0.967723	0.703	0.18	0	OEC
Ier3	0	0.966477	0.502	0.081	0	OEC
Acpp	0	0.939518	0.523	0.038	0	OEC
Ezr	0	0.938449	0.753	0.217	0	OEC
Sdc4	0	0.936571	0.785	0.203	0	OEC
Fth1	0	0.936252	1	0.973	0	OEC
Tagln2	0	0.930159	0.771	0.24	0	OEC
Mettl7a1	0	0.919547	0.705	0.174	0	OEC
Cpsf4l	0	0.918472	0.357	0.005	0	OEC
Lap3	0	0.914486	0.615	0.107	0	OEC
Hey1	0	0.896436	0.582	0.091	0	OEC
Proser2	0	0.894355	0.519	0.045	0	OEC
Aqp3	0	0.888308	0.773	0.164	0	OEC
Glis3	0	0.885807	0.498	0.022	0	OEC
Stard13	0	0.884426	0.457	0.007	0	OEC
Alad	0	0.870294	0.605	0.123	0	OEC
Slc39a10	0	0.861601	0.521	0.058	0	OEC
Abcc5	0	0.856119	0.522	0.09	0	OEC
Slc5a9	0	0.847021	0.418	0.012	0	OEC
Tst	0	0.832196	0.798	0.24	0	OEC
Aqp11	0	0.82704	0.511	0.048	0	OEC
Anpep	0	0.823244	0.451	0.014	0	OEC
Sox10	0	0.821968	0.437	0.009	0	OEC
Gm11744	0	0.819287	0.479	0.039	0	OEC
Mmd	0	0.815191	0.478	0.063	0	OEC
Fam210b	0	0.813782	0.581	0.125	0	OEC
Tgfb2	0	0.804734	0.458	0.054	0	OEC
Cracr2b	0	0.799987	0.5	0.053	0	OEC
Ehf	0	0.799115	0.473	0.044	0	OEC
Fmo2	0	0.789633	0.533	0.087	0	OEC
C2cd4b	0	0.787896	0.291	0.005	0	OEC
Cryab	0	0.784827	0.522	0.079	0	OEC
Wfdc2	0	0.783765	0.839	0.243	0	OEC
Atp6v1b1	0	0.780988	0.508	0.053	0	OEC
Otx2os1	0	0.76938	0.432	0.035	0	OEC
Gata6	0	0.767313	0.429	0.008	0	OEC
Foxc1	0	0.764868	0.42	0.012	0	OEC
Tbc1d30	0	0.756214	0.47	0.049	0	OEC
Clmn	0	0.754114	0.578	0.119	0	OEC
Cmtm8	0	0.75284	0.512	0.084	0	OEC
Hpn	0	0.752315	0.407	0.015	0	OEC
St3gal6	0	0.744234	0.505	0.08	0	OEC
Irf6	0	0.739718	0.553	0.099	0	OEC
Zfp637	0	0.738004	0.518	0.094	0	OEC
Enpep	0	0.737001	0.36	0.004	0	OEC
Fam65b	0	0.724817	0.44	0.051	0	OEC
Plce1	0	0.719855	0.414	0.036	0	OEC
Slc25a35	0	0.715084	0.401	0.034	0	OEC
Kcnj13	0	0.701584	0.369	0.023	0	OEC
Pgm2l1	0	0.698082	0.433	0.058	0	OEC
Ptgdr	0	0.683064	0.338	0.007	0	OEC
Met	0	0.678695	0.45	0.049	0	OEC
Slc4a2	0	0.676464	0.47	0.08	0	OEC
Iqgap2	0	0.668886	0.498	0.098	0	OEC
Apoc1	0	0.667806	0.381	0.058	0	OEC
Erbb3	0	0.657822	0.418	0.044	0	OEC
Scn1b	0	0.65736	0.334	0.012	0	OEC
Tspan12	0	0.65567	0.458	0.07	0	OEC
BC026585	0	0.650395	0.411	0.062	0	OEC
AU021092	0	0.650256	0.505	0.086	0	OEC
Cldn6	0	0.648714	0.355	0.02	0	OEC
Shank2	0	0.63991	0.416	0.046	0	OEC
Kcnn4	0	0.63097	0.383	0.027	0	OEC
Plagl1	0	0.621271	0.372	0.045	0	OEC
Gstt3	0	0.620088	0.397	0.049	0	OEC
Stard5	0	0.618626	0.377	0.036	0	OEC
Car4	0	0.61008	0.284	0.002	0	OEC
Gk	0	0.607077	0.395	0.057	0	OEC
Tnfrsf12a	0	0.598327	0.356	0.033	0	OEC
Rhov	0	0.595594	0.342	0.029	0	OEC
Prkar2b	0	0.593881	0.414	0.063	0	OEC
Bambi	0	0.589775	0.338	0.027	0	OEC
Ggt1	0	0.586436	0.334	0.006	0	OEC
Itga9	0	0.584083	0.345	0.013	0	OEC
Clec2d	0	0.57512	0.412	0.064	0	OEC
Hspb8	0	0.57386	0.396	0.053	0	OEC
Fam174b	0	0.565921	0.309	0.013	0	OEC
Atp6v0a4	0	0.559379	0.35	0.039	0	OEC
Plpp2	0	0.557792	0.373	0.039	0	OEC
Mme	0	0.555006	0.313	0.01	0	OEC
Prss8	0	0.549258	0.366	0.044	0	OEC
Smoc2	0	0.54331	0.279	0.014	0	OEC
Kcnj15	0	0.532437	0.326	0.031	0	OEC
Dpysl4	0	0.524736	0.285	0.005	0	OEC
Cdc42ep1	0	0.523642	0.28	0.007	0	OEC
Slc14a1	0	0.522271	0.296	0.022	0	OEC
Prr15l	0	0.511824	0.338	0.04	0	OEC
Ldhd	0	0.510578	0.272	0.015	0	OEC
Ppp1r1b	0	0.505426	0.264	0.008	0	OEC
Nhsl1	0	0.501479	0.318	0.029	0	OEC
Tmem63a	0	0.499989	0.367	0.054	0	OEC
Paqr4	0	0.489455	0.288	0.012	0	OEC
Osmr	0	0.481482	0.285	0.01	0	OEC
Palmd	0	0.480752	0.27	0.021	0	OEC
Cdc42ep5	0	0.474542	0.314	0.035	0	OEC
Aco1	0	0.474505	0.316	0.032	0	OEC
Mlph	0	0.47355	0.29	0.021	0	OEC
Chst15	0	0.473458	0.283	0.032	0	OEC
Cited4	0	0.472822	0.254	0.015	0	OEC
Mgat4a	0	0.470956	0.304	0.037	0	OEC
4933404O12Rik	0	0.467289	0.271	0.028	0	OEC
Itpripl1	0	0.465751	0.262	0.024	0	OEC
Igsf5	0	0.463925	0.254	0.004	0	OEC
Cldn8	0	0.462977	0.286	0.029	0	OEC
Lacc1	0	0.458241	0.294	0.033	0	OEC
Myo5c	0	0.456318	0.299	0.03	0	OEC
Sel1l3	0	0.448852	0.302	0.035	0	OEC
Wwc2	0	0.438625	0.301	0.033	0	OEC
Pdzrn3	0	0.431938	0.252	0.006	0	OEC
Rab15	0	0.421636	0.286	0.033	0	OEC
Fgfr2	0	0.40753	0.277	0.022	0	OEC
Boc	0	0.389764	0.251	0.022	0	OEC
Por	3.99359e-307	0.839255	0.811	0.267	7.74836e-303	OEC
Dcpp3	1.17613e-305	3.6265	0.35	0.055	2.28192e-301	OEC
Ugdh	1.3972e-305	0.841716	0.681	0.187	2.71084e-301	OEC
Plcb4	7.32879e-305	0.623406	0.439	0.078	1.42193e-300	OEC
Slc35a3	3.40415e-304	0.735382	0.525	0.112	6.60472e-300	OEC
Acadm	8.2987e-304	0.804485	0.675	0.181	1.61011e-299	OEC
Phactr2	5.84043e-303	0.67406	0.487	0.097	1.13316e-298	OEC
Alcam	5.40958e-302	0.780765	0.534	0.116	1.04957e-297	OEC
Mgat5	6.64907e-302	0.630119	0.432	0.077	1.29005e-297	OEC
Csrp1	4.69205e-299	0.639314	0.441	0.08	9.10351e-295	OEC
Usp25	1.52555e-297	0.732161	0.552	0.125	2.95988e-293	OEC
Slc26a7	1.62487e-297	0.587666	0.418	0.071	3.15258e-293	OEC
Fam107a	6.28334e-296	0.537174	0.336	0.048	1.21909e-291	OEC
Rgma	1.53948e-295	0.384265	0.271	0.031	2.9869e-291	OEC
Rasef	1.77402e-295	0.374594	0.264	0.029	3.44195e-291	OEC
Selm	6.14027e-295	0.917482	0.897	0.413	1.19133e-290	OEC
Gk5	1.94967e-293	0.886051	0.631	0.167	3.78276e-289	OEC
Cald1	3.6785e-291	0.543872	0.378	0.06	7.13702e-287	OEC
Jph1	7.07098e-290	0.430116	0.277	0.033	1.37191e-285	OEC
Prdx1	8.74579e-290	1.07622	0.981	0.759	1.69686e-285	OEC
Rab27b	1.92628e-289	0.479221	0.335	0.048	3.73737e-285	OEC
Akr1a1	3.34428e-289	0.943106	0.943	0.536	6.48858e-285	OEC
Sp8	8.85626e-286	0.558721	0.405	0.07	1.71829e-281	OEC
Xbp1	3.1233e-285	0.831756	0.684	0.203	6.05982e-281	OEC
Cpd	5.07073e-280	0.710554	0.544	0.126	9.83824e-276	OEC
Fzd7	1.17741e-278	0.418118	0.3	0.04	2.28441e-274	OEC
Timp3	1.06506e-277	0.654122	0.384	0.065	2.06643e-273	OEC
Tsku	5.62793e-277	0.629795	0.386	0.066	1.09193e-272	OEC
Idh2	7.4375e-277	0.752363	0.587	0.151	1.44302e-272	OEC
Lmo4	5.88583e-275	0.871525	0.776	0.279	1.14197e-270	OEC
Mal2	2.87984e-273	0.399014	0.253	0.029	5.58747e-269	OEC
Lpgat1	7.1482e-273	0.682723	0.59	0.146	1.38689e-268	OEC
Gmds	9.27929e-270	0.3959	0.265	0.032	1.80037e-265	OEC
Abcc3	1.65105e-269	0.445215	0.289	0.039	3.20337e-265	OEC
Pea15a	2.10549e-266	0.540029	0.411	0.076	4.08508e-262	OEC
Acsm4	1.88549e-264	0.912633	0.465	0.1	3.65823e-260	OEC
Pgrmc1	1.10703e-259	0.835668	0.9	0.42	2.14786e-255	OEC
Sox21	1.33486e-255	0.464677	0.325	0.051	2.5899e-251	OEC
Grhl1	1.2546e-253	0.434016	0.336	0.054	2.43417e-249	OEC
Nfkbiz	1.10904e-252	0.55855	0.395	0.074	2.15176e-248	OEC
Ildr1	4.03774e-252	0.56164	0.447	0.094	7.83402e-248	OEC
Mapk12	4.93468e-246	0.401695	0.266	0.036	9.57427e-242	OEC
F2r	9.39967e-245	0.531431	0.385	0.073	1.82372e-240	OEC
Abca13	1.17668e-243	0.562896	0.388	0.073	2.28298e-239	OEC
Plod2	1.22751e-243	0.393043	0.27	0.037	2.38162e-239	OEC
Rhod	9.78214e-241	0.410952	0.267	0.037	1.89793e-236	OEC
Ocln	3.03695e-240	0.365657	0.259	0.034	5.89229e-236	OEC
Cryl1	2.91994e-237	0.49803	0.428	0.089	5.66526e-233	OEC
Fosb	3.39563e-237	0.671846	0.309	0.05	6.5882e-233	OEC
Otud1	1.18606e-236	0.468204	0.319	0.052	2.30119e-232	OEC
Cyb5r3	7.15113e-236	0.643031	0.621	0.178	1.38746e-231	OEC
Tgif1	3.55915e-235	0.508429	0.384	0.074	6.90546e-231	OEC
Six1	3.34933e-234	0.540886	0.452	0.1	6.49838e-230	OEC
Ociad2	4.1722e-234	0.471904	0.499	0.115	8.0949e-230	OEC
Itpripl2	5.87322e-233	0.460298	0.285	0.043	1.13952e-228	OEC
Epcam	2.35957e-232	0.763777	0.946	0.552	4.57804e-228	OEC
2610507B11Rik	6.02841e-232	0.641318	0.544	0.144	1.16963e-227	OEC
Lamp2	1.84786e-226	0.774832	0.767	0.304	3.58521e-222	OEC
Epb41l5	2.8621e-226	0.404236	0.326	0.056	5.55304e-222	OEC
Mfhas1	1.80836e-223	0.396197	0.299	0.048	3.50858e-219	OEC
Aldh4a1	1.41681e-220	0.365961	0.258	0.037	2.7489e-216	OEC
Sema6a	1.10411e-219	0.575026	0.451	0.105	2.14219e-215	OEC
Slc35f5	2.44717e-218	0.414267	0.326	0.058	4.748e-214	OEC
Ltf	2.91228e-218	1.12119	0.794	0.313	5.65041e-214	OEC
Crb3	8.12159e-216	0.462562	0.37	0.073	1.57575e-211	OEC
Gpc1	3.71842e-215	0.495568	0.36	0.071	7.21449e-211	OEC
Tubb2a	8.4378e-215	0.586971	0.429	0.1	1.6371e-210	OEC
Sms	3.47007e-214	0.770994	0.702	0.259	6.73262e-210	OEC
Mecom	4.26459e-213	0.603276	0.479	0.118	8.27415e-209	OEC
Serinc5	2.59563e-211	0.40058	0.296	0.05	5.03605e-207	OEC
Aldh2	9.09573e-211	0.792905	0.852	0.392	1.76475e-206	OEC
Dmrta2	4.10536e-210	0.476819	0.399	0.086	7.96523e-206	OEC
Zfp467	4.72031e-210	0.547252	0.455	0.109	9.15834e-206	OEC
Magi1	1.67446e-209	0.542028	0.478	0.117	3.2488e-205	OEC
Syne4	2.17572e-209	0.380807	0.259	0.039	4.22133e-205	OEC
Crym	1.67152e-206	0.654872	0.423	0.101	3.24309e-202	OEC
Crot	6.97543e-206	0.514644	0.433	0.102	1.35337e-201	OEC
Pcdh17	4.53765e-205	0.702421	0.613	0.193	8.80395e-201	OEC
Tacstd2	9.32661e-205	0.45728	0.305	0.055	1.80955e-200	OEC
Amotl2	1.05082e-204	0.36412	0.251	0.037	2.03879e-200	OEC
Slc3a2	1.22293e-204	0.784545	0.683	0.251	2.37274e-200	OEC
Gstm2	2.23666e-201	0.438425	0.578	0.159	4.33957e-197	OEC
Errfi1	2.57956e-201	0.367059	0.278	0.046	5.00487e-197	OEC
Pax6	1.06507e-200	0.497006	0.426	0.1	2.06645e-196	OEC
Anxa6	1.85417e-200	0.428934	0.353	0.072	3.59746e-196	OEC
B4galt6	3.88007e-200	0.382053	0.293	0.051	7.52811e-196	OEC
Pkp2	2.86571e-199	0.358892	0.27	0.044	5.56005e-195	OEC
Alas1	3.25792e-197	0.592177	0.517	0.143	6.32102e-193	OEC
Dnajc25	3.57822e-197	0.433259	0.336	0.067	6.94246e-193	OEC
Jun	5.69171e-197	1.03149	0.77	0.345	1.10431e-192	OEC
Ece1	3.15156e-196	0.671696	0.706	0.254	6.11465e-192	OEC
Myl12a	1.59894e-195	0.804905	0.844	0.443	3.10227e-191	OEC
Gmnn	4.95413e-195	0.566062	0.48	0.127	9.61199e-191	OEC
Btg1	6.53291e-195	0.744754	0.866	0.48	1.26752e-190	OEC
Ssfa2	2.12174e-194	0.399234	0.321	0.062	4.1166e-190	OEC
Mfap3l	3.72904e-194	0.396407	0.339	0.067	7.23507e-190	OEC
Acaa2	3.81626e-194	0.53078	0.412	0.099	7.40432e-190	OEC
Plpp3	8.75462e-193	0.372053	0.316	0.06	1.69857e-188	OEC
Pebp1	2.17805e-192	0.666283	0.757	0.3	4.22585e-188	OEC
Insr	3.28691e-192	0.529282	0.442	0.111	6.37726e-188	OEC
Cdcp1	4.59818e-192	0.366008	0.285	0.05	8.92139e-188	OEC
Smpdl3a	8.69019e-192	0.635561	0.648	0.221	1.68607e-187	OEC
Smim1	1.0454e-190	0.389276	0.289	0.052	2.02829e-186	OEC
Rcn1	1.06919e-189	0.337132	0.26	0.043	2.07444e-185	OEC
Nfib	1.92188e-189	0.675202	0.795	0.331	3.72882e-185	OEC
Itpr1	3.40542e-187	0.433904	0.369	0.081	6.6072e-183	OEC
Lpin1	1.99101e-184	0.462778	0.371	0.084	3.86295e-180	OEC
Sptssa	1.09285e-183	0.776184	0.684	0.272	2.12035e-179	OEC
Dcxr	3.19824e-183	0.545246	0.518	0.148	6.20522e-179	OEC
Aldoc	5.02214e-183	0.439863	0.334	0.07	9.74396e-179	OEC
Smco4	9.58041e-182	0.419732	0.317	0.064	1.85879e-177	OEC
Spint1	8.6451e-181	0.368328	0.302	0.058	1.67732e-176	OEC
Tmem205	9.37947e-181	0.583656	0.571	0.181	1.8198e-176	OEC
Pkp4	1.27747e-179	0.491862	0.431	0.11	2.47855e-175	OEC
Insig2	2.98011e-178	0.491501	0.418	0.106	5.78201e-174	OEC
Emb	4.37571e-178	0.676279	0.788	0.351	8.48975e-174	OEC
Pvrl2	3.42295e-175	0.370305	0.303	0.06	6.6412e-171	OEC
Fam84b	6.32054e-175	0.368389	0.314	0.064	1.22631e-170	OEC
Litaf	1.66213e-174	0.45862	0.386	0.093	3.22486e-170	OEC
Pdlim5	2.5238e-174	0.340219	0.276	0.051	4.89668e-170	OEC
Ppa2	4.11297e-174	0.552472	0.511	0.154	7.97999e-170	OEC
Il17rd	4.54117e-174	0.425115	0.303	0.061	8.81079e-170	OEC
Wwc1	1.89627e-173	0.599568	0.535	0.167	3.67915e-169	OEC
Tmem238	1.89828e-173	0.485087	0.466	0.129	3.68303e-169	OEC
BC005537	1.89324e-171	0.777544	0.842	0.476	3.67327e-167	OEC
Rbm47	8.03746e-171	0.481776	0.456	0.125	1.55943e-166	OEC
Nupr1	1.10658e-170	0.700804	0.636	0.23	2.14699e-166	OEC
Dock7	1.80898e-170	0.419024	0.377	0.091	3.50979e-166	OEC
Aox2	8.32545e-169	0.420399	0.542	0.162	1.6153e-164	OEC
Dcaf11	7.55253e-168	0.572994	0.627	0.221	1.46534e-163	OEC
Rreb1	1.2764e-167	0.303385	0.252	0.045	2.47647e-163	OEC
Chmp2b	4.12781e-167	0.510467	0.461	0.132	8.00877e-163	OEC
Nedd4	1.87674e-166	0.5928	0.698	0.27	3.64124e-162	OEC
Fam129b	1.06801e-165	0.362292	0.291	0.059	2.07215e-161	OEC
Nfia	2.31951e-165	0.523701	0.467	0.135	4.50031e-161	OEC
S100a10	1.38879e-164	0.438583	0.539	0.162	2.69453e-160	OEC
Akip1	2.23543e-161	0.403042	0.331	0.076	4.33718e-157	OEC
Il33	3.53279e-161	0.403294	0.393	0.098	6.85431e-157	OEC
Ank	3.86655e-161	0.446934	0.426	0.115	7.50188e-157	OEC
Cdk6	7.76792e-161	0.456947	0.452	0.128	1.50713e-156	OEC
Slc16a11	3.31072e-160	0.708218	0.709	0.306	6.42346e-156	OEC
Tjp2	4.60887e-160	0.334493	0.279	0.056	8.94212e-156	OEC
Cnn3	3.15854e-159	0.501821	0.745	0.3	6.1282e-155	OEC
Nampt	1.39107e-156	0.490693	0.447	0.13	2.69896e-152	OEC
Tcf7l2	2.4787e-156	0.3496	0.31	0.068	4.80918e-152	OEC
Cebpb	4.1258e-156	0.500182	0.822	0.4	8.00487e-152	OEC
Mmp15	3.09097e-155	0.322296	0.262	0.05	5.99711e-151	OEC
Tjp3	7.27094e-155	0.345551	0.265	0.053	1.41071e-150	OEC
Prkci	3.56349e-154	0.380558	0.35	0.085	6.91389e-150	OEC
Pbx1	4.3537e-154	0.607366	0.677	0.268	8.44706e-150	OEC
Gpcpd1	5.12715e-153	0.480905	0.476	0.144	9.94769e-149	OEC
H2afj	1.6363e-152	0.628575	0.84	0.444	3.17475e-148	OEC
Fat1	1.995e-152	0.383029	0.369	0.093	3.8707e-148	OEC
Gpx4	3.0284e-152	0.645489	0.963	0.787	5.8757e-148	OEC
Ctnnd1	1.08837e-151	0.43209	0.407	0.111	2.11165e-147	OEC
Ccdc90b	2.45052e-151	0.368406	0.333	0.079	4.7545e-147	OEC
Gsta4	5.53304e-151	0.400082	0.506	0.153	1.07352e-146	OEC
Vamp8	1.78152e-150	0.598623	0.768	0.343	3.45651e-146	OEC
Ccnd1	3.51103e-150	0.411081	0.366	0.092	6.8121e-146	OEC
Fam213a	5.99152e-150	0.6265	0.784	0.365	1.16247e-145	OEC
Chka	8.37916e-150	0.405127	0.357	0.09	1.62572e-145	OEC
Ptprf	3.0484e-148	0.47574	0.53	0.171	5.9145e-144	OEC
Cdv3	6.38576e-147	0.547253	0.554	0.197	1.23897e-142	OEC
Slc37a3	7.00773e-147	0.3308	0.278	0.059	1.35964e-142	OEC
Fmnl2	3.68146e-145	0.403008	0.373	0.099	7.14277e-141	OEC
Baiap2l1	5.51192e-144	0.357344	0.304	0.07	1.06942e-139	OEC
Fbxo32	4.68268e-142	0.434158	0.443	0.132	9.08533e-138	OEC
Mthfd2l	3.10584e-141	0.523364	0.539	0.187	6.02596e-137	OEC
B4galt4	6.27851e-141	0.365095	0.278	0.061	1.21816e-136	OEC
Gng5	1.21711e-139	0.57298	0.876	0.49	2.36143e-135	OEC
Cgn	1.03316e-138	0.353781	0.302	0.071	2.00453e-134	OEC
Magi3	1.58928e-138	0.368933	0.333	0.084	3.08353e-134	OEC
Sft2d2	3.26363e-138	0.347355	0.366	0.097	6.3321e-134	OEC
Skp1a	2.92364e-137	0.565081	0.886	0.536	5.67244e-133	OEC
Acsl5	3.81428e-137	0.375025	0.356	0.095	7.40047e-133	OEC
Cers2	2.43446e-135	0.361594	0.346	0.091	4.72333e-131	OEC
Cstb	1.23491e-134	0.689607	0.765	0.408	2.39598e-130	OEC
Phkb	7.22964e-134	0.344406	0.284	0.066	1.4027e-129	OEC
Ergic1	7.36781e-134	0.3113	0.302	0.073	1.4295e-129	OEC
Get4	9.12298e-134	0.420903	0.397	0.116	1.77004e-129	OEC
Tom1l1	8.18739e-132	0.346722	0.329	0.085	1.58852e-127	OEC
Dusp1	3.9897e-131	0.828583	0.641	0.289	7.74082e-127	OEC
Slc9a3r1	2.87304e-130	0.488296	0.554	0.206	5.57427e-126	OEC
Trnt1	6.11868e-130	0.373898	0.356	0.098	1.18715e-125	OEC
Slc27a2	7.72218e-130	0.56195	0.658	0.283	1.49826e-125	OEC
Myh14	1.34277e-129	0.329	0.311	0.077	2.60525e-125	OEC
BC048546	2.96574e-129	0.912835	0.459	0.16	5.75412e-125	OEC
P4hb	3.0294e-129	0.511756	0.56	0.214	5.87764e-125	OEC
Mylip	9.27997e-129	0.320586	0.28	0.065	1.8005e-124	OEC
Tns3	1.55294e-128	0.33832	0.322	0.083	3.01301e-124	OEC
Ybx3	3.8651e-128	0.528868	0.505	0.183	7.49907e-124	OEC
Cd164	3.97789e-128	0.480044	0.647	0.263	7.7179e-124	OEC
Ivd	3.45714e-127	0.30497	0.252	0.055	6.70754e-123	OEC
Itgb1	5.49512e-127	0.472444	0.523	0.189	1.06616e-122	OEC
S100a1	7.35343e-126	0.341918	0.703	0.293	1.42671e-121	OEC
Tax1bp3	9.50154e-123	0.37962	0.337	0.093	1.84349e-118	OEC
Qsox2	1.43235e-122	0.289184	0.257	0.058	2.77904e-118	OEC
Tmem55a	4.92736e-122	0.330281	0.317	0.084	9.56006e-118	OEC
Hlf	1.40582e-121	0.334797	0.309	0.079	2.72758e-117	OEC
Map3k1	8.54498e-121	0.323483	0.279	0.068	1.6579e-116	OEC
Map2	1.52616e-120	0.349143	0.339	0.094	2.96106e-116	OEC
Tkt	2.07803e-120	0.494918	0.786	0.396	4.03179e-116	OEC
Ppp2r2b	3.42559e-120	0.277871	0.286	0.069	6.64632e-116	OEC
Gas6	1.68424e-119	0.391701	0.325	0.088	3.26776e-115	OEC
Chd3	2.32586e-118	0.429925	0.505	0.181	4.51264e-114	OEC
Oat	4.65203e-118	0.355378	0.352	0.102	9.02587e-114	OEC
Lrp6	5.68718e-118	0.379765	0.402	0.126	1.10343e-113	OEC
Fetub	1.29541e-117	0.570618	0.772	0.412	2.51335e-113	OEC
Spry2	1.77524e-115	0.448823	0.312	0.086	3.44433e-111	OEC
Pard3	4.70788e-115	0.398001	0.385	0.12	9.13423e-111	OEC
Ric8	9.74847e-115	0.335261	0.316	0.086	1.8914e-110	OEC
2020-09-11	1.45704e-114	0.377048	0.379	0.118	2.82695e-110	OEC
Amotl1	3.96776e-113	0.280905	0.284	0.073	7.69824e-109	OEC
Socs2	5.04e-112	0.339922	0.548	0.205	9.7786e-108	OEC
2210013O21Rik	5.4143e-112	0.367545	0.376	0.118	1.05048e-107	OEC
Sypl	1.82294e-111	0.430465	0.579	0.234	3.53686e-107	OEC
Ephx1	4.29268e-111	0.301853	0.325	0.09	8.32865e-107	OEC
Hk2	1.03834e-109	0.449188	0.384	0.123	2.01459e-105	OEC
Egr1	1.13363e-109	0.578823	0.325	0.097	2.19946e-105	OEC
Spr	4.28552e-108	0.328572	0.308	0.087	8.31477e-104	OEC
Mapt	7.62841e-108	0.296039	0.256	0.064	1.48006e-103	OEC
Sgms1	1.66536e-107	0.29041	0.317	0.09	3.23112e-103	OEC
Abcd3	7.94845e-107	0.331736	0.356	0.109	1.54216e-102	OEC
Plin3	4.87395e-106	0.299913	0.256	0.065	9.45643e-102	OEC
Papss2	6.77274e-106	0.262874	0.338	0.1	1.31405e-101	OEC
Ptpn12	1.64599e-105	0.266577	0.259	0.065	3.19355e-101	OEC
Tmem53	2.05164e-105	0.339499	0.305	0.087	3.9806e-101	OEC
Idh1	4.35324e-105	0.427317	0.462	0.169	8.44616e-101	OEC
Sod1	9.70441e-105	0.553773	0.802	0.46	1.88285e-100	OEC
Srgap2	8.67479e-104	0.312858	0.271	0.072	1.68308e-99	OEC
Ano6	1.38809e-103	0.300598	0.268	0.071	2.69316e-99	OEC
Pnkd	2.04674e-103	0.371646	0.43	0.151	3.97108e-99	OEC
Laptm4a	1.44085e-102	0.468283	0.766	0.408	2.79553e-98	OEC
Satb1	5.44842e-102	0.288476	0.283	0.078	1.0571e-97	OEC
Pitx1	7.85554e-102	0.298082	0.296	0.084	1.52413e-97	OEC
Junb	8.18417e-102	0.769851	0.605	0.287	1.58789e-97	OEC
Trak2	1.04521e-101	0.28926	0.302	0.086	2.02791e-97	OEC
Thbs1	2.14885e-101	0.250381	0.277	0.074	4.16919e-97	OEC
Rexo2	8.37024e-101	0.500072	0.707	0.359	1.62399e-96	OEC
Faah	1.68631e-100	0.327846	0.363	0.116	3.27178e-96	OEC
Hmgn1	2.05252e-100	0.42801	0.854	0.509	3.98231e-96	OEC
Mllt4	2.6024e-100	0.342254	0.412	0.141	5.04918e-96	OEC
Srp14	5.78e-100	0.520327	0.86	0.569	1.12143e-95	OEC
Nipal2	1.04134e-99	0.290037	0.308	0.089	2.02041e-95	OEC
Notch1	1.23638e-99	0.268764	0.258	0.068	2.39883e-95	OEC
Maged1	5.52138e-99	0.369613	0.476	0.177	1.07126e-94	OEC
Rhoc	8.35093e-99	0.288992	0.333	0.101	1.62025e-94	OEC
Ptp4a1	1.14453e-98	0.406271	0.64	0.292	2.22063e-94	OEC
Hsd17b11	2.36452e-98	0.300549	0.364	0.116	4.58763e-94	OEC
Mrps28	2.3908e-97	0.363823	0.425	0.152	4.63864e-93	OEC
Dusp16	3.24566e-97	0.28753	0.256	0.068	6.29723e-93	OEC
Polr2f	8.33747e-97	0.481945	0.655	0.322	1.61764e-92	OEC
Sec14l2	1.0781e-96	0.297733	0.392	0.132	2.09172e-92	OEC
Rpl14	1.9642e-96	0.346403	0.985	0.875	3.81095e-92	OEC
Entpd5	2.10782e-96	0.330979	0.416	0.146	4.0896e-92	OEC
Phpt1	2.21886e-94	0.369585	0.375	0.129	4.30503e-90	OEC
Clint1	5.28787e-94	0.358881	0.431	0.159	1.02595e-89	OEC
Hsd17b10	9.66908e-94	0.434421	0.506	0.209	1.876e-89	OEC
Ddt	1.36498e-93	0.376623	0.407	0.147	2.64834e-89	OEC
Ctsl	3.75833e-93	0.320587	0.522	0.208	7.2919e-89	OEC
4930523C07Rik	4.77123e-93	0.261088	0.256	0.069	9.25714e-89	OEC
Mxd4	7.11269e-93	0.387008	0.48	0.187	1.38e-88	OEC
Timm9	8.40794e-93	0.28782	0.273	0.078	1.63131e-88	OEC
Arrdc1	1.16321e-92	0.264609	0.252	0.068	2.25687e-88	OEC
Trp53inp2	4.0693e-92	0.362327	0.408	0.145	7.89525e-88	OEC
Anxa11	4.90636e-92	0.312293	0.36	0.121	9.51932e-88	OEC
Bzw2	1.71949e-91	0.398371	0.464	0.184	3.33615e-87	OEC
S100a16	6.48449e-91	0.284787	0.288	0.085	1.25812e-86	OEC
Nckap1	7.82886e-91	0.315995	0.366	0.124	1.51896e-86	OEC
Atl2	9.37237e-91	0.280913	0.344	0.112	1.81843e-86	OEC
2020-03-05	1.21188e-90	0.346723	0.469	0.184	2.3513e-86	OEC
Ralgapa2	9.94627e-90	0.26848	0.279	0.082	1.92978e-85	OEC
Dnajc3	2.00198e-89	0.35973	0.489	0.194	3.88425e-85	OEC
Fkbp4	2.80794e-89	0.439242	0.691	0.352	5.44796e-85	OEC
Nop10	1.40858e-88	0.436134	0.786	0.46	2.73293e-84	OEC
Tspan13	3.19892e-88	0.46352	0.783	0.446	6.20654e-84	OEC
Runx1	5.10232e-88	0.306486	0.421	0.155	9.89952e-84	OEC
Klf6	6.55426e-87	0.427138	0.421	0.162	1.27166e-82	OEC
Rps20	9.30552e-87	0.380979	0.963	0.784	1.80546e-82	OEC
Cdpf1	9.63569e-87	0.346016	0.387	0.14	1.86952e-82	OEC
Rps2	2.65883e-86	0.40419	0.906	0.692	5.15866e-82	OEC
Pycr2	3.08798e-86	0.35708	0.41	0.153	5.9913e-82	OEC
Sel1l	5.65635e-86	0.360098	0.462	0.184	1.09745e-81	OEC
Unc119	1.00754e-85	0.359814	0.438	0.171	1.95483e-81	OEC
Tmem38b	2.67984e-85	0.339134	0.305	0.099	5.19943e-81	OEC
Hadh	4.99037e-85	0.2601	0.271	0.081	9.68231e-81	OEC
Rabep1	8.4729e-85	0.321195	0.421	0.158	1.64391e-80	OEC
G6pc3	7.88085e-84	0.250191	0.298	0.094	1.52904e-79	OEC
Anxa2	5.53716e-82	0.328013	0.566	0.249	1.07432e-77	OEC
Rab25	2.97923e-81	0.311521	0.436	0.169	5.78029e-77	OEC
Nadk2	4.42766e-81	0.263361	0.319	0.107	8.59055e-77	OEC
Limd2	1.77968e-80	0.375839	0.534	0.239	3.45293e-76	OEC
Dnase2a	1.78737e-78	0.282701	0.271	0.085	3.46786e-74	OEC
Adi1	2.30781e-78	0.28634	0.293	0.096	4.4776e-74	OEC
Cldnd1	2.6411e-78	0.371848	0.543	0.245	5.12426e-74	OEC
Rragd	5.6153e-78	0.280281	0.36	0.13	1.08948e-73	OEC
Amd1	6.68178e-78	0.314008	0.375	0.141	1.2964e-73	OEC
Adss	7.72094e-78	0.308577	0.419	0.165	1.49802e-73	OEC
Acsl3	2.81917e-77	0.271745	0.353	0.126	5.46976e-73	OEC
Gclm	2.86945e-77	0.288343	0.575	0.269	5.5673e-73	OEC
Rabac1	4.94315e-77	0.428666	0.813	0.507	9.59069e-73	OEC
Tsc22d1	6.47747e-77	0.497023	0.829	0.55	1.25676e-72	OEC
Tmbim6	1.15822e-76	0.27632	0.956	0.734	2.24717e-72	OEC
Pigt	1.18659e-76	0.320849	0.445	0.183	2.30221e-72	OEC
Lrrfip1	1.86276e-75	0.27708	0.37	0.139	3.61413e-71	OEC
Tcn2	3.61809e-74	0.251365	0.258	0.08	7.01982e-70	OEC
Uqcr11	4.90193e-74	0.373933	0.933	0.748	9.51073e-70	OEC
Tmem9b	4.18869e-73	0.312562	0.429	0.175	8.1269e-69	OEC
Crip2	1.04402e-72	0.350008	0.545	0.249	2.02561e-68	OEC
Spint2	1.06573e-72	0.366312	0.864	0.562	2.06773e-68	OEC
Tmem147	2.12998e-72	0.318171	0.482	0.21	4.1326e-68	OEC
mt-Atp6	2.7487e-72	0.27337	1	1	5.33303e-68	OEC
Sqstm1	2.18723e-71	0.306411	0.393	0.157	4.24367e-67	OEC
mt-Cytb	3.92459e-71	0.288456	1	0.999	7.6145e-67	OEC
Carkd	5.91391e-71	0.306645	0.467	0.2	1.14742e-66	OEC
Rplp1	2.08553e-70	0.281678	0.982	0.893	4.04635e-66	OEC
Impad1	1.43111e-69	0.272538	0.374	0.147	2.77664e-65	OEC
Ssr2	2.79419e-69	0.354771	0.541	0.256	5.42128e-65	OEC
Arrdc3	6.62421e-69	0.340426	0.399	0.163	1.28523e-64	OEC
Rnf13	8.00555e-69	0.260012	0.374	0.145	1.55324e-64	OEC
Elf1	1.9288e-68	0.265875	0.375	0.148	3.74227e-64	OEC
Ubc	1.94287e-68	0.501958	0.821	0.587	3.76957e-64	OEC
2700094K13Rik	2.27217e-68	0.324247	0.53	0.24	4.40846e-64	OEC
Acss2	2.57725e-68	0.274582	0.314	0.114	5.00039e-64	OEC
Rplp0	3.13315e-68	0.277042	0.958	0.749	6.07895e-64	OEC
1500011K16Rik	3.80368e-68	0.332712	0.481	0.216	7.37991e-64	OEC
Rps27l	1.20899e-67	0.353154	0.881	0.613	2.34567e-63	OEC
Hook3	1.75895e-67	0.304379	0.355	0.139	3.41272e-63	OEC
mt-Co2	2.35174e-67	0.27681	1	1	4.56285e-63	OEC
Gnas	2.60249e-67	0.299958	0.79	0.442	5.04936e-63	OEC
Tmbim4	2.83983e-67	0.325563	0.516	0.239	5.50984e-63	OEC
Atox1	2.91951e-67	0.270957	0.97	0.876	5.66443e-63	OEC
Picalm	3.21342e-67	0.354478	0.523	0.247	6.23469e-63	OEC
Creg1	3.35038e-67	0.312244	0.505	0.23	6.5004e-63	OEC
Cited2	6.80109e-67	0.26755	0.345	0.133	1.31955e-62	OEC
Tmco1	8.15193e-67	0.309958	0.537	0.252	1.58164e-62	OEC
Acaa1a	1.06098e-66	0.289304	0.382	0.154	2.05851e-62	OEC
Notch2	4.57925e-64	0.327845	0.259	0.09	8.88467e-60	OEC
Slc38a2	5.724e-63	0.316252	0.365	0.149	1.11057e-58	OEC
Rdx	7.6733e-63	0.273787	0.471	0.213	1.48877e-58	OEC
Ddrgk1	4.1871e-62	0.339563	0.611	0.317	8.12382e-58	OEC
Ccni	4.37681e-62	0.377584	0.655	0.372	8.49188e-58	OEC
Eif4g1	6.75844e-62	0.317889	0.456	0.208	1.31127e-57	OEC
Drap1	1.3491e-61	0.279403	0.406	0.176	2.61753e-57	OEC
Mbd3	7.80797e-61	0.254633	0.36	0.148	1.5149e-56	OEC
Atraid	1.0312e-60	0.296887	0.475	0.22	2.00073e-56	OEC
Dpm3	1.80672e-60	0.347106	0.675	0.374	3.5054e-56	OEC
Sp3os	4.17422e-60	0.259224	0.271	0.098	8.09882e-56	OEC
Dstn	2.20514e-59	0.330466	0.901	0.7	4.27841e-55	OEC
Gsn	6.25773e-59	0.26402	0.457	0.207	1.21412e-54	OEC
Gm8730	5.17523e-58	0.378437	0.626	0.356	1.0041e-53	OEC
Fam173a	5.55548e-58	0.313026	0.438	0.204	1.07788e-53	OEC
H2afv	1.92415e-57	0.273357	0.756	0.44	3.73323e-53	OEC
2610001J05Rik	2.17568e-57	0.297663	0.434	0.2	4.22125e-53	OEC
Nudt4	4.3083e-57	0.293339	0.42	0.191	8.35896e-53	OEC
Rchy1	5.17671e-57	0.258807	0.452	0.206	1.00438e-52	OEC
Cox8a	1.23831e-55	0.256624	0.987	0.901	2.40258e-51	OEC
Sec11c	4.50106e-55	0.276659	0.603	0.313	8.73296e-51	OEC
Rpn2	5.27006e-55	0.27253	0.52	0.253	1.0225e-50	OEC
Naa50	8.10817e-55	0.267134	0.386	0.171	1.57315e-50	OEC
Zfhx3	2.8587e-54	0.269082	0.483	0.23	5.54646e-50	OEC
Bphl	4.30154e-54	0.260518	0.462	0.217	8.34586e-50	OEC
Aamp	6.35024e-54	0.294633	0.533	0.27	1.23207e-49	OEC
Eny2	1.26968e-53	0.286252	0.524	0.266	2.46344e-49	OEC
Brd2	4.47784e-53	0.306601	0.541	0.283	8.6879e-49	OEC
Actn4	2.02532e-52	0.250008	0.402	0.183	3.92952e-48	OEC
Chchd7	2.59887e-52	0.254922	0.358	0.157	5.04233e-48	OEC
Aes	6.36947e-52	0.30283	0.53	0.273	1.23581e-47	OEC
Psmb6	4.0708e-51	0.34436	0.789	0.527	7.89817e-47	OEC
Cisd1	6.02864e-51	0.322336	0.753	0.471	1.16968e-46	OEC
Immp1l	1.94728e-50	0.251497	0.443	0.213	3.77812e-46	OEC
Ict1	4.60956e-50	0.282338	0.569	0.305	8.94347e-46	OEC
Pts	4.02852e-49	0.259525	0.457	0.223	7.81614e-45	OEC
Rrbp1	4.35289e-49	0.285672	0.473	0.234	8.44548e-45	OEC
Gtf2i	2.08957e-48	0.268979	0.471	0.234	4.05418e-44	OEC
Capns1	3.19251e-47	0.270406	0.577	0.313	6.19411e-43	OEC
Jund	1.66922e-46	0.300922	0.829	0.582	3.23861e-42	OEC
Mrpl52	1.19072e-45	0.270378	0.706	0.422	2.31024e-41	OEC
Cox14	1.81545e-45	0.294687	0.754	0.483	3.52234e-41	OEC
2410015M20Rik	3.39754e-45	0.300638	0.705	0.448	6.59191e-41	OEC
Ndufs5	1.48049e-43	0.292851	0.78	0.516	2.87245e-39	OEC
Hspe1	2.14865e-43	0.264007	0.712	0.435	4.16882e-39	OEC
Anapc13	1.35833e-40	0.275089	0.773	0.513	2.63544e-36	OEC
Rpp21	2.11648e-40	0.269649	0.522	0.289	4.10639e-36	OEC
Eef1g	2.31629e-39	0.262402	0.762	0.506	4.49406e-35	OEC
Bsg	6.57912e-39	0.251056	0.873	0.661	1.27648e-34	OEC
Ralbp1	1.14142e-38	0.264729	0.664	0.408	2.21458e-34	OEC
Atp5g2	1.00665e-37	0.261928	0.838	0.597	1.9531e-33	OEC
Fkbp1a	1.39958e-37	0.262022	0.701	0.448	2.71547e-33	OEC
Atp5g1	3.0852e-37	0.251327	0.814	0.571	5.98591e-33	OEC
Ier2	6.01736e-34	0.506102	0.51	0.319	1.16749e-29	OEC
Ndufa11	2.58192e-33	0.256083	0.73	0.501	5.00944e-29	OEC
Myl12b	5.57939e-29	0.252519	0.651	0.43	1.08251e-24	OEC
Fos	1.17856e-25	0.281567	0.477	0.312	2.28665e-21	OEC
Ngp	0	4.24558	0.944	0.418	0	Neut.
Camp	0	4.18466	0.942	0.468	0	Neut.
S100a8	0	4.12197	0.997	0.734	0	Neut.
S100a9	0	4.08629	0.997	0.671	0	Neut.
Lcn2	0	3.50843	0.952	0.213	0	Neut.
Wfdc21	0	3.50306	0.964	0.188	0	Neut.
Retnlg	0	3.44115	0.838	0.341	0	Neut.
Ifitm6	0	2.69045	0.858	0.099	0	Neut.
Ltf	0	2.6732	0.871	0.266	0	Neut.
Chil3	0	2.53032	0.722	0.124	0	Neut.
Pglyrp1	0	2.47568	0.944	0.165	0	Neut.
Mmp8	0	2.3405	0.566	0.076	0	Neut.
Anxa1	0	2.12632	0.906	0.242	0	Neut.
Hp	0	1.96595	0.877	0.133	0	Neut.
Arhgdib	0	1.94535	0.922	0.25	0	Neut.
Slpi	0	1.93512	0.705	0.099	0	Neut.
S100a6	0	1.90542	0.851	0.331	0	Neut.
Mmp9	0	1.89578	0.613	0.047	0	Neut.
G0s2	0	1.88841	0.619	0.062	0	Neut.
S100a11	0	1.82652	0.962	0.395	0	Neut.
Cybb	0	1.78639	0.775	0.12	0	Neut.
Cd52	0	1.77609	0.965	0.246	0	Neut.
Cd177	0	1.72254	0.696	0.044	0	Neut.
Lrg1	0	1.66841	0.598	0.027	0	Neut.
Prdx5	0	1.65851	0.95	0.539	0	Neut.
Rac2	0	1.60286	0.82	0.166	0	Neut.
Ly6g	0	1.58954	0.536	0.02	0	Neut.
Cyba	0	1.57923	0.878	0.245	0	Neut.
Lyz2	0	1.52491	0.978	0.425	0	Neut.
Itgam	0	1.50727	0.646	0.059	0	Neut.
Msrb1	0	1.49679	0.859	0.226	0	Neut.
Cebpe	0	1.49539	0.493	0.025	0	Neut.
Ncf1	0	1.46946	0.673	0.077	0	Neut.
Alox5ap	0	1.4613	0.833	0.161	0	Neut.
Mcemp1	0	1.45741	0.655	0.066	0	Neut.
AA467197	0	1.43006	0.512	0.022	0	Neut.
Fcer1g	0	1.4205	0.922	0.221	0	Neut.
Fcnb	0	1.41941	0.34	0.029	0	Neut.
Tyrobp	0	1.40851	0.97	0.283	0	Neut.
F630028O10Rik	0	1.40224	0.55	0.059	0	Neut.
Gmfg	0	1.39685	0.781	0.153	0	Neut.
Trem3	0	1.3806	0.564	0.033	0	Neut.
Adpgk	0	1.3631	0.618	0.073	0	Neut.
Serpinb1a	0	1.35127	0.53	0.073	0	Neut.
Pygl	0	1.3504	0.604	0.06	0	Neut.
Ckap4	0	1.28289	0.578	0.073	0	Neut.
Gpsm3	0	1.26659	0.587	0.09	0	Neut.
Fpr2	0	1.26352	0.448	0.016	0	Neut.
Lcp1	0	1.26175	0.748	0.198	0	Neut.
Coro1a	0	1.23782	0.834	0.201	0	Neut.
Hcst	0	1.2322	0.553	0.053	0	Neut.
Mxd1	0	1.22135	0.509	0.067	0	Neut.
Ncf2	0	1.2113	0.558	0.106	0	Neut.
Gsr	0	1.20979	0.794	0.296	0	Neut.
Hmgn2	0	1.20638	0.772	0.554	0	Neut.
Hdc	0	1.20316	0.589	0.151	0	Neut.
Pfn1	0	1.17669	0.962	0.692	0	Neut.
Clec4a2	0	1.16395	0.564	0.071	0	Neut.
Ostf1	0	1.16338	0.727	0.252	0	Neut.
Glrx	0	1.14519	0.512	0.059	0	Neut.
Arpc1b	0	1.12559	0.825	0.3	0	Neut.
St3gal5	0	1.12472	0.517	0.147	0	Neut.
Ptprc	0	1.12167	0.601	0.127	0	Neut.
Syne1	0	1.11585	0.453	0.031	0	Neut.
Arpc5	0	1.11531	0.835	0.37	0	Neut.
Gda	0	1.10949	0.568	0.14	0	Neut.
Sh3bgrl3	0	1.09281	0.914	0.516	0	Neut.
Spi1	0	1.08428	0.593	0.113	0	Neut.
Ncf4	0	1.08005	0.492	0.068	0	Neut.
Hmgb2	0	1.07838	0.924	0.604	0	Neut.
Ly6c2	0	1.07566	0.732	0.137	0	Neut.
Cpne3	0	1.05995	0.552	0.178	0	Neut.
Lst1	0	1.05697	0.598	0.123	0	Neut.
Tkt	0	1.02813	0.788	0.365	0	Neut.
Gnai2	0	1.02087	0.735	0.27	0	Neut.
Cnn2	0	1.02012	0.588	0.151	0	Neut.
Tmcc1	0	1.01983	0.552	0.221	0	Neut.
Itgb2	0	1.01778	0.481	0.059	0	Neut.
Itgb2l	0	1.00869	0.403	0.011	0	Neut.
Cxcr2	0	0.980078	0.321	0.024	0	Neut.
Vasp	0	0.971808	0.583	0.201	0	Neut.
Actb	0	0.969138	0.999	0.925	0	Neut.
Cd33	0	0.961121	0.388	0.034	0	Neut.
Vsir	0	0.961023	0.483	0.079	0	Neut.
Clec12a	0	0.95906	0.487	0.089	0	Neut.
Cd44	0	0.959033	0.472	0.092	0	Neut.
Flna	0	0.949377	0.544	0.141	0	Neut.
Lsp1	0	0.946975	0.617	0.139	0	Neut.
B230208H11Rik	0	0.946822	0.372	0.015	0	Neut.
Pirb	0	0.943401	0.408	0.051	0	Neut.
Slfn2	0	0.938811	0.508	0.102	0	Neut.
Pilra	0	0.925006	0.363	0.027	0	Neut.
Chil1	0	0.919996	0.386	0.03	0	Neut.
Cdk2ap2	0	0.915834	0.606	0.274	0	Neut.
Arpc2	0	0.895162	0.862	0.489	0	Neut.
Ltb4r1	0	0.884818	0.357	0.027	0	Neut.
Ogfrl1	0	0.871976	0.446	0.112	0	Neut.
Plaur	0	0.866981	0.354	0.041	0	Neut.
Ap3s1	0	0.865735	0.486	0.176	0	Neut.
Fam49b	0	0.865623	0.598	0.197	0	Neut.
Plbd1	0	0.863543	0.374	0.044	0	Neut.
Samsn1	0	0.862924	0.409	0.063	0	Neut.
Ccnd3	0	0.853607	0.505	0.153	0	Neut.
Fam101b	0	0.849128	0.465	0.111	0	Neut.
C5ar1	0	0.847735	0.325	0.016	0	Neut.
Anxa3	0	0.838502	0.425	0.089	0	Neut.
Dhrs7	0	0.835939	0.494	0.162	0	Neut.
Arrb2	0	0.83138	0.47	0.121	0	Neut.
Ccr1	0	0.827635	0.289	0.03	0	Neut.
C3	0	0.82462	0.369	0.051	0	Neut.
Samd9l	0	0.824005	0.345	0.052	0	Neut.
Lta4h	0	0.817074	0.378	0.081	0	Neut.
Stk17b	0	0.809644	0.344	0.077	0	Neut.
Lbr	0	0.798862	0.529	0.177	0	Neut.
Agpat2	0	0.796932	0.334	0.044	0	Neut.
Cd53	0	0.790303	0.468	0.112	0	Neut.
Rgs18	0	0.781346	0.352	0.051	0	Neut.
Lgals3	0	0.779574	0.683	0.175	0	Neut.
AB124611	0	0.756886	0.346	0.055	0	Neut.
Il17ra	0	0.75664	0.352	0.104	0	Neut.
Slc2a3	0	0.746046	0.29	0.036	0	Neut.
Anxa2	0	0.737994	0.582	0.222	0	Neut.
Emp3	0	0.73725	0.498	0.136	0	Neut.
Actr3	0	0.736585	0.731	0.396	0	Neut.
Txn1	0	0.730036	0.849	0.586	0	Neut.
Mapk13	0	0.729888	0.347	0.069	0	Neut.
Mgst2	0	0.72067	0.289	0.023	0	Neut.
Pnkp	0	0.720544	0.348	0.069	0	Neut.
Csf3r	0	0.720142	0.274	0.052	0	Neut.
Glipr2	0	0.718906	0.31	0.034	0	Neut.
Lims1	0	0.717043	0.419	0.144	0	Neut.
Actn1	0	0.711939	0.422	0.15	0	Neut.
Ifitm3	0	0.704614	0.804	0.33	0	Neut.
Zyx	0	0.690863	0.349	0.083	0	Neut.
Igsf6	0	0.682187	0.309	0.046	0	Neut.
Lilr4b	0	0.674228	0.255	0.024	0	Neut.
Cd300lf	0	0.668565	0.262	0.024	0	Neut.
Cd24a	0	0.666743	0.743	0.273	0	Neut.
Nhsl2	0	0.664398	0.256	0.027	0	Neut.
Hck	0	0.659199	0.318	0.055	0	Neut.
Myl6	0	0.656602	0.94	0.786	0	Neut.
Nfe2	0	0.645872	0.262	0.041	0	Neut.
Ppp1r18	0	0.643329	0.297	0.051	0	Neut.
Gm26740	0	0.636631	0.251	0.04	0	Neut.
Lilrb4a	0	0.634199	0.284	0.05	0	Neut.
Gca	0	0.633406	0.346	0.099	0	Neut.
Shfm1	0	0.622039	0.964	0.831	0	Neut.
Hcls1	0	0.621231	0.3	0.068	0	Neut.
2310001H17Rik	0	0.618096	0.265	0.06	0	Neut.
Tmsb4x	0	0.613981	1	0.997	0	Neut.
H2-D1	0	0.613591	0.769	0.365	0	Neut.
Dgat1	0	0.609211	0.263	0.047	0	Neut.
Golim4	0	0.600155	0.31	0.082	0	Neut.
Slc40a1	0	0.596581	0.255	0.031	0	Neut.
Msra	0	0.590861	0.259	0.039	0	Neut.
Gpx1	0	0.587188	0.836	0.442	0	Neut.
Ptpre	0	0.578827	0.278	0.06	0	Neut.
Myo1f	0	0.552284	0.252	0.046	0	Neut.
B2m	0	0.506628	0.831	0.393	0	Neut.
Mgst1	0	0.499829	0.79	0.333	0	Neut.
Actg1	0	0.49869	0.966	0.823	0	Neut.
Limd2	4.4522e-305	0.764267	0.509	0.218	8.63816e-301	Neut.
Fam111a	1.27055e-303	0.594286	0.33	0.092	2.46513e-299	Neut.
Fos	1.23474e-298	0.63743	0.615	0.283	2.39563e-294	Neut.
Abracl	1.41365e-294	0.670647	0.476	0.193	2.74277e-290	Neut.
Arhgap30	6.76618e-294	0.556566	0.267	0.063	1.31277e-289	Neut.
Tsc22d4	1.28285e-293	0.696976	0.506	0.218	2.48899e-289	Neut.
Fcgr3	2.61335e-291	0.542504	0.303	0.078	5.07042e-287	Neut.
Sell	2.17969e-289	0.595011	0.278	0.069	4.22904e-285	Neut.
Ikzf1	2.57473e-288	0.540048	0.285	0.072	4.9955e-284	Neut.
Rasgrp2	9.57968e-283	0.492914	0.28	0.07	1.85865e-278	Neut.
Ethe1	1.06319e-279	0.554359	0.317	0.09	2.06281e-275	Neut.
Tspo	2.66584e-278	0.633143	0.597	0.291	5.17226e-274	Neut.
Lmo4	7.77711e-275	0.645242	0.56	0.266	1.50892e-270	Neut.
Fxyd5	1.10716e-270	0.668224	0.404	0.139	2.14812e-266	Neut.
Pgd	7.89439e-270	0.674816	0.45	0.186	1.53167e-265	Neut.
Klf2	9.02973e-268	0.62944	0.348	0.109	1.75195e-263	Neut.
Cotl1	1.049e-266	0.524911	0.656	0.336	2.03526e-262	Neut.
Aldh2	5.96082e-266	0.509873	0.7	0.374	1.15652e-261	Neut.
Gpi1	3.84069e-265	0.653769	0.658	0.395	7.45171e-261	Neut.
Mettl9	6.40063e-261	0.69313	0.463	0.202	1.24185e-256	Neut.
Lasp1	3.37912e-259	0.662614	0.392	0.147	6.55617e-255	Neut.
Taldo1	6.91979e-258	0.56337	0.79	0.532	1.34258e-253	Neut.
Prr13	4.62435e-257	0.835499	0.6	0.34	8.97217e-253	Neut.
Rhog	6.11888e-254	0.523589	0.286	0.081	1.18718e-249	Neut.
Gng5	1.18931e-253	0.578908	0.752	0.475	2.3075e-249	Neut.
Efhd2	2.20466e-253	0.56611	0.342	0.113	4.27748e-249	Neut.
Ldha	9.65853e-251	0.62623	0.529	0.245	1.87395e-246	Neut.
Lamtor4	1.93195e-244	0.684474	0.588	0.329	3.74836e-240	Neut.
Hmha1	5.01783e-241	0.497624	0.281	0.08	9.7356e-237	Neut.
Skap2	3.49582e-237	0.56786	0.356	0.127	6.78259e-233	Neut.
Cyb5r4	1.17721e-236	0.632185	0.485	0.228	2.28402e-232	Neut.
Sp100	4.07784e-236	0.494928	0.252	0.067	7.91182e-232	Neut.
Ptpn6	5.80457e-229	0.554003	0.398	0.155	1.1262e-224	Neut.
Sri	7.56307e-229	0.660838	0.546	0.291	1.46739e-224	Neut.
Nudt4	4.05904e-224	0.624064	0.41	0.174	7.87535e-220	Neut.
Ppp2r5a	2.41842e-223	0.576982	0.302	0.1	4.69221e-219	Neut.
Laptm5	2.11709e-221	0.462911	0.379	0.138	4.10757e-217	Neut.
Sat1	1.89118e-220	0.479829	0.576	0.288	3.66926e-216	Neut.
Cfl1	5.90057e-220	0.504047	0.834	0.659	1.14483e-215	Neut.
Adrbk1	8.75873e-216	0.534988	0.299	0.1	1.69937e-211	Neut.
Capg	1.04864e-213	0.565114	0.311	0.106	2.03458e-209	Neut.
Plp2	1.53849e-211	0.491479	0.265	0.081	2.98498e-207	Neut.
Dstn	1.6926e-211	0.504108	0.846	0.69	3.28397e-207	Neut.
Vamp5	9.28481e-211	0.488605	0.273	0.085	1.80144e-206	Neut.
Arpc3	2.96687e-209	0.578183	0.697	0.479	5.75633e-205	Neut.
Rap1b	2.01244e-199	0.543214	0.524	0.275	3.90454e-195	Neut.
Cdkn2d	3.97603e-198	0.579517	0.404	0.176	7.7143e-194	Neut.
Rnf130	7.02431e-196	0.531749	0.328	0.124	1.36286e-191	Neut.
Anxa11	2.05812e-194	0.513852	0.302	0.109	3.99316e-190	Neut.
Tm6sf1	3.06149e-194	0.446103	0.27	0.087	5.9399e-190	Neut.
Degs1	2.54115e-188	0.563047	0.456	0.221	4.93034e-184	Neut.
Ifitm2	2.53642e-185	0.582364	0.638	0.387	4.92116e-181	Neut.
R3hdm4	4.92035e-183	0.584645	0.531	0.302	9.54646e-179	Neut.
Fam107b	9.03262e-181	0.5054	0.392	0.172	1.75251e-176	Neut.
Msn	2.99746e-180	0.49911	0.379	0.16	5.81568e-176	Neut.
G6pdx	4.61148e-175	0.478616	0.28	0.102	8.9472e-171	Neut.
Aprt	6.07577e-173	0.591182	0.416	0.206	1.17882e-168	Neut.
Gnb2	9.25096e-173	0.53255	0.564	0.33	1.79487e-168	Neut.
Myh9	9.21389e-172	0.557583	0.397	0.188	1.78768e-167	Neut.
Grina	1.60077e-168	0.621517	0.329	0.141	3.10582e-164	Neut.
Abtb1	5.19322e-166	0.503237	0.27	0.099	1.00759e-161	Neut.
Ccl6	1.3453e-163	0.814678	0.265	0.095	2.61014e-159	Neut.
Kdm7a	1.33179e-162	0.592707	0.404	0.199	2.58394e-158	Neut.
Junb	2.08255e-162	0.543771	0.508	0.273	4.04056e-158	Neut.
Gsn	4.76422e-162	0.476738	0.409	0.193	9.24353e-158	Neut.
Mcl1	8.33746e-162	0.621856	0.394	0.193	1.61763e-157	Neut.
Vim	9.99431e-161	0.305935	0.468	0.219	1.9391e-156	Neut.
Cd63	1.41573e-160	0.379718	0.574	0.316	2.74681e-156	Neut.
Sorl1	2.98154e-160	0.542087	0.387	0.185	5.78478e-156	Neut.
Hipk1	8.44316e-160	0.556941	0.446	0.236	1.63814e-155	Neut.
Tcp11l2	1.02976e-159	0.471913	0.264	0.096	1.99794e-155	Neut.
Capza1	3.41524e-159	0.535008	0.458	0.246	6.62625e-155	Neut.
Akna	5.59232e-159	0.515344	0.298	0.119	1.08502e-154	Neut.
Cited2	5.99858e-158	0.516252	0.3	0.121	1.16384e-153	Neut.
Cxcr4	2.33186e-153	0.451074	0.275	0.105	4.52428e-149	Neut.
Celf2	1.50446e-152	0.505801	0.371	0.175	2.91894e-148	Neut.
Actr2	5.06898e-151	0.509916	0.516	0.305	9.83484e-147	Neut.
Lcn3	1.37595e-148	0.381916	0.389	0.189	2.66961e-144	Neut.
Zfp36	6.10616e-147	0.544637	0.323	0.14	1.18472e-142	Neut.
Serf2	2.51534e-144	0.384871	0.889	0.778	4.88025e-140	Neut.
Nadk	5.7005e-139	0.490484	0.357	0.173	1.10601e-134	Neut.
Obp2a	6.6549e-139	0.419672	0.611	0.432	1.29118e-134	Neut.
Klf6	4.51283e-138	0.468917	0.333	0.152	8.7558e-134	Neut.
Rgs2	1.89107e-137	0.545374	0.297	0.126	3.66905e-133	Neut.
Samhd1	1.15265e-131	0.483885	0.295	0.129	2.23638e-127	Neut.
Srgn	1.85249e-131	0.535729	0.293	0.126	3.5942e-127	Neut.
Mrpl33	2.33346e-127	0.438612	0.726	0.548	4.52738e-123	Neut.
1110008F13Rik	2.75689e-126	0.482988	0.511	0.322	5.34892e-122	Neut.
Mob1a	1.81364e-124	0.480467	0.337	0.165	3.51882e-120	Neut.
Atp6v0e	1.08344e-118	0.409242	0.556	0.358	2.10208e-114	Neut.
Gadd45a	2.28163e-118	0.458041	0.284	0.128	4.42682e-114	Neut.
Cdc42	5.20789e-114	0.370987	0.74	0.582	1.01044e-109	Neut.
Sec11c	1.20028e-112	0.427713	0.49	0.304	2.32878e-108	Neut.
Tpm3	2.49534e-110	0.456735	0.469	0.292	4.84145e-106	Neut.
Ptpn18	1.91137e-109	0.354124	0.446	0.249	3.70844e-105	Neut.
Gyg	3.59261e-107	0.368759	0.256	0.113	6.97038e-103	Neut.
Rbfa	1.57806e-106	0.402843	0.263	0.12	3.06175e-102	Neut.
Ier2	4.3531e-105	0.370776	0.492	0.306	8.44588e-101	Neut.
Tuba4a	9.1401e-104	0.449189	0.339	0.177	1.77336e-99	Neut.
Vamp8	1.10946e-100	0.331403	0.54	0.337	2.15258e-96	Neut.
Tln1	4.42078e-100	0.414459	0.422	0.251	8.5772e-96	Neut.
Hiatl1	2.01073e-96	0.390004	0.321	0.167	3.90122e-92	Neut.
Scp2	7.02134e-95	0.396132	0.693	0.58	1.36228e-90	Neut.
Rnaseh2c	6.43057e-92	0.412722	0.363	0.21	1.24766e-87	Neut.
Nfkbia	2.36951e-91	0.366756	0.359	0.199	4.59732e-87	Neut.
Gnai3	3.0318e-89	0.37427	0.252	0.122	5.88231e-85	Neut.
Cmtm7	5.71577e-89	0.275455	0.336	0.174	1.10897e-84	Neut.
Myl12a	3.97754e-87	0.360844	0.597	0.441	7.71722e-83	Neut.
2810417H13Rik	1.38585e-86	0.390561	0.259	0.124	2.68883e-82	Neut.
Wdr1	2.45984e-79	0.374701	0.422	0.271	4.77258e-75	Neut.
Mapk3	1.06819e-78	0.362815	0.28	0.148	2.07251e-74	Neut.
Cebpb	2.38272e-75	0.265291	0.565	0.398	4.62295e-71	Neut.
Rac1	2.81127e-74	0.343741	0.472	0.322	5.45442e-70	Neut.
Hist1h2ap	5.44913e-74	0.562914	0.261	0.138	1.05724e-69	Neut.
Cbl	1.43569e-73	0.372821	0.296	0.167	2.78553e-69	Neut.
1810058I24Rik	1.99486e-73	0.358508	0.435	0.292	3.87043e-69	Neut.
Capzb	3.08759e-73	0.331672	0.528	0.38	5.99055e-69	Neut.
Btg1	1.23784e-70	0.423082	0.613	0.48	2.40166e-66	Neut.
Top2a	2.47863e-70	0.42589	0.255	0.131	4.80904e-66	Neut.
Max	1.94991e-68	0.360321	0.287	0.164	3.78322e-64	Neut.
Cks2	6.4202e-65	0.37267	0.37	0.236	1.24565e-60	Neut.
Card19	2.79418e-64	0.331154	0.268	0.15	5.42128e-60	Neut.
Flot2	9.92127e-63	0.315322	0.307	0.179	1.92492e-58	Neut.
Bnip3l	6.09749e-60	0.326506	0.45	0.324	1.18303e-55	Neut.
Mup5	3.62883e-57	0.315789	0.283	0.168	7.04066e-53	Neut.
Tnfaip8	4.30371e-57	0.258936	0.255	0.14	8.35005e-53	Neut.
Ptbp3	1.12972e-56	0.316846	0.54	0.416	2.19188e-52	Neut.
Unc119	1.87372e-56	0.312249	0.282	0.168	3.63538e-52	Neut.
Clic1	8.27777e-55	0.272893	0.588	0.472	1.60605e-50	Neut.
H2afz	1.04562e-54	0.331355	0.842	0.838	2.0287e-50	Neut.
Rhoa	1.17995e-54	0.283823	0.586	0.468	2.28935e-50	Neut.
Cd47	8.4427e-53	0.253533	0.621	0.501	1.63805e-48	Neut.
Btg2	1.39231e-52	0.369622	0.353	0.232	2.70136e-48	Neut.
Atg3	9.22702e-52	0.317607	0.326	0.211	1.79023e-47	Neut.
Gm42418	1.54548e-51	0.282257	0.666	0.547	2.99853e-47	Neut.
Pak2	3.89264e-48	0.327782	0.307	0.202	7.5525e-44	Neut.
Myl12b	1.32741e-46	0.300979	0.536	0.426	2.57545e-42	Neut.
Msl1	1.13748e-45	0.311508	0.334	0.227	2.20693e-41	Neut.
Smc4	5.46948e-45	0.307237	0.26	0.159	1.06119e-40	Neut.
Akap13	1.12557e-42	0.335408	0.325	0.226	2.18383e-38	Neut.
Tecr	6.13621e-40	0.288304	0.499	0.405	1.19055e-35	Neut.
Fam32a	2.36475e-33	0.279373	0.336	0.247	4.58808e-29	Neut.
Far1	2.70512e-32	0.269274	0.257	0.174	5.24847e-28	Neut.
Tmed3	8.42394e-32	0.266278	0.294	0.208	1.63441e-27	Neut.
Larp4b	2.43873e-29	0.262459	0.346	0.263	4.73163e-25	Neut.
Coch	0	3.70876	0.861	0.173	0	MV
Stap1	0	2.68353	0.865	0.08	0	MV
Pam	0	2.56807	0.844	0.1	0	MV
Ascl3	0	2.52421	0.785	0.049	0	MV
Gm933	0	2.38547	0.754	0.027	0	MV
Moxd1	0	2.2901	0.786	0.029	0	MV
Cox8b	0	2.22953	0.622	0.068	0	MV
Galnt13	0	1.97918	0.72	0.019	0	MV
Hepacam2	0	1.93608	0.809	0.031	0	MV
Wfdc2	0	1.88839	0.836	0.224	0	MV
Cspg5	0	1.88603	0.684	0.033	0	MV
Foxi1	0	1.74919	0.624	0.021	0	MV
Ociad2	0	1.67106	0.744	0.085	0	MV
Iqgap1	0	1.62543	0.862	0.366	0	MV
Cftr	0	1.58794	0.635	0.026	0	MV
Cnn3	0	1.55673	0.889	0.275	0	MV
Sdc4	0	1.50719	0.827	0.182	0	MV
S100a1	0	1.47613	0.833	0.271	0	MV
Slc12a2	0	1.46549	0.85	0.37	0	MV
Tspan1	0	1.45502	0.572	0.053	0	MV
Rnase1	0	1.41698	0.377	0.015	0	MV
Tfcp2l1	0	1.39984	0.553	0.035	0	MV
Cd24a	0	1.3841	0.857	0.286	0	MV
Tnnt1	0	1.37081	0.514	0.064	0	MV
Krt7	0	1.34056	0.532	0.034	0	MV
Meg3	0	1.30928	0.27	0.025	0	MV
Clcnka	0	1.30166	0.493	0.01	0	MV
Phlda1	0	1.29055	0.604	0.118	0	MV
Atp6ap2	0	1.28806	0.802	0.37	0	MV
Rcan2	0	1.26397	0.504	0.018	0	MV
Atp7b	0	1.2603	0.502	0.04	0	MV
Nupr1	0	1.255	0.702	0.213	0	MV
Vps36	0	1.25295	0.664	0.187	0	MV
Krt18	0	1.24921	0.914	0.298	0	MV
Fryl	0	1.24815	0.654	0.16	0	MV
Atp7a	0	1.22427	0.485	0.032	0	MV
Ncald	0	1.20754	0.48	0.034	0	MV
Igfbp7	0	1.20319	0.491	0.039	0	MV
Steap2	0	1.19914	0.548	0.087	0	MV
Reep5	0	1.17857	0.71	0.254	0	MV
Tmem176b	0	1.17799	0.74	0.212	0	MV
Sult1c1	0	1.17787	0.694	0.163	0	MV
Scnn1a	0	1.17404	0.498	0.046	0	MV
Slc31a2	0	1.15917	0.533	0.103	0	MV
Tceb2	0	1.15666	0.947	0.758	0	MV
Myo1b	0	1.12468	0.506	0.071	0	MV
Epcam	0	1.12138	0.953	0.539	0	MV
Krt8	0	1.11391	0.811	0.23	0	MV
Atp6v0b	0	1.11148	0.876	0.56	0	MV
Adgrg2	0	1.10341	0.464	0.027	0	MV
Ctnnb1	0	1.08019	0.749	0.352	0	MV
Tmem176a	0	1.07137	0.643	0.168	0	MV
Prox1	0	1.06586	0.385	0.009	0	MV
Prr18	0	1.05622	0.367	0.012	0	MV
Slc31a1	0	1.04881	0.533	0.137	0	MV
Ckap2	0	1.04418	0.411	0.036	0	MV
Scnn1b	0	1.03653	0.387	0.013	0	MV
Pfkp	0	1.03335	0.49	0.074	0	MV
Gstm5	0	1.02421	0.686	0.181	0	MV
Tagln2	0	1.01495	0.661	0.231	0	MV
Alcam	0	0.996099	0.508	0.104	0	MV
Sptbn1	0	0.994447	0.692	0.343	0	MV
Hacd3	0	0.983867	0.467	0.081	0	MV
Slc44a3	0	0.967894	0.404	0.03	0	MV
Dapl1	0	0.967021	0.528	0.126	0	MV
Kcnk1	0	0.950248	0.396	0.054	0	MV
Atp6v0d2	0	0.941462	0.345	0.006	0	MV
Rasd1	0	0.93605	0.34	0.008	0	MV
Slc25a36	0	0.93521	0.458	0.095	0	MV
Sox4	0	0.924135	0.541	0.161	0	MV
Atp6v1d	0	0.911724	0.726	0.372	0	MV
Btg2	0	0.906931	0.601	0.22	0	MV
Espn	0	0.905486	0.37	0.064	0	MV
Gnas	0	0.905335	0.805	0.429	0	MV
Foxi2	0	0.900932	0.315	0.006	0	MV
Sema3a	0	0.887981	0.356	0.047	0	MV
Cmtm8	0	0.883213	0.396	0.078	0	MV
Gng4	0	0.877378	0.331	0.011	0	MV
Scnn1g	0	0.871328	0.318	0.007	0	MV
Ctsl	0	0.86151	0.563	0.196	0	MV
Nrip3	0	0.858825	0.292	0.009	0	MV
P2ry14	0	0.857555	0.38	0.062	0	MV
Asgr1	0	0.845984	0.272	0.007	0	MV
Plxna4	0	0.841661	0.488	0.144	0	MV
Trp53i11	0	0.836138	0.369	0.065	0	MV
Bsnd	0	0.828405	0.313	0.006	0	MV
Cav2	0	0.826527	0.312	0.025	0	MV
Aldh1l1	0	0.819603	0.306	0.018	0	MV
Dmpk	0	0.818283	0.312	0.018	0	MV
Pxdc1	0	0.809915	0.3	0.019	0	MV
Fam117a	0	0.806029	0.361	0.068	0	MV
Rbm47	0	0.795815	0.425	0.116	0	MV
Muc1	0	0.79474	0.31	0.029	0	MV
2610016A17Rik	0	0.788004	0.276	0.007	0	MV
Muc20	0	0.786131	0.292	0.011	0	MV
Itm2b	0	0.780756	0.976	0.855	0	MV
Dmrt2	0	0.777348	0.276	0.008	0	MV
Nt5e	0	0.774634	0.3	0.016	0	MV
1700019D03Rik	0	0.773925	0.279	0.011	0	MV
Myh14	0	0.768659	0.352	0.067	0	MV
Kl	0	0.76699	0.269	0.005	0	MV
Mal	0	0.751607	0.29	0.019	0	MV
Spats2l	0	0.745858	0.293	0.031	0	MV
mt-Nd2	0	0.739312	0.998	0.958	0	MV
Nav2	0	0.732875	0.331	0.062	0	MV
Rnf152	0	0.703536	0.281	0.042	0	MV
Eps8	0	0.69422	0.286	0.033	0	MV
Frk	0	0.689793	0.261	0.027	0	MV
Plcg2	0	0.6471	0.29	0.046	0	MV
Pdpn	0	0.624617	0.264	0.039	0	MV
Rbpms	0	0.623558	0.266	0.044	0	MV
mt-Co1	0	0.621339	1	1	0	MV
mt-Co3	0	0.581311	1	1	0	MV
mt-Nd4	0	0.574889	0.999	0.996	0	MV
mt-Cytb	0	0.55108	1	0.999	0	MV
mt-Nd1	0	0.467325	1	0.999	0	MV
mt-Co2	0	0.426225	1	1	0	MV
mt-Atp6	0	0.380008	1	1	0	MV
Dsp	8.23904e-305	0.769845	0.406	0.107	1.59854e-300	MV
Trib2	2.89275e-303	0.636142	0.27	0.047	5.61251e-299	MV
Arl4c	3.27839e-301	0.715992	0.349	0.079	6.36072e-297	MV
Cyfip2	3.05478e-292	0.870483	0.597	0.243	5.92688e-288	MV
Egr1	2.71856e-288	1.06255	0.355	0.088	5.27456e-284	MV
Pak7	1.97202e-287	0.734672	0.266	0.049	3.82611e-283	MV
Atp2a3	5.72531e-283	0.648711	0.282	0.056	1.11082e-278	MV
Spint2	1.42208e-274	0.745084	0.868	0.552	2.75912e-270	MV
Wbp5	3.78892e-264	0.768804	0.77	0.434	7.35126e-260	MV
Malat1	5.65446e-262	0.482558	1	0.998	1.09708e-257	MV
Crim1	2.39588e-260	0.645168	0.339	0.083	4.64848e-256	MV
S100a13	4.78807e-258	0.862371	0.624	0.29	9.28982e-254	MV
Cd164	7.9482e-257	0.756521	0.593	0.255	1.54211e-252	MV
Kitl	7.54084e-253	0.61285	0.281	0.06	1.46307e-248	MV
Slc43a2	9.83268e-252	0.825653	0.49	0.178	1.90774e-247	MV
Lmo7	1.51566e-251	0.668734	0.315	0.077	2.94068e-247	MV
St14	2.23311e-251	0.602557	0.266	0.055	4.33267e-247	MV
Klf9	6.22983e-246	0.596526	0.265	0.056	1.20871e-241	MV
Slit2	7.92426e-244	0.603372	0.257	0.054	1.53747e-239	MV
Ndrg2	3.38395e-240	0.555658	0.264	0.055	6.56554e-236	MV
Atp5e	1.30331e-235	0.601638	0.931	0.819	2.52868e-231	MV
Stk39	3.714e-232	0.665223	0.339	0.093	7.20591e-228	MV
Aldh1a1	1.38828e-229	0.638336	0.312	0.08	2.69355e-225	MV
Sox2	1.63305e-227	0.639516	0.374	0.11	3.16845e-223	MV
Slc27a2	5.32813e-227	0.727811	0.606	0.274	1.03376e-222	MV
Zbtb20	4.86702e-217	0.742986	0.562	0.252	9.44299e-213	MV
Acsl3	8.2706e-217	0.675263	0.372	0.118	1.60466e-212	MV
Rragd	2.02081e-216	0.674846	0.379	0.121	3.92078e-212	MV
Eef1d	7.45603e-216	0.738906	0.682	0.376	1.44662e-211	MV
Blnk	3.12233e-215	0.549053	0.256	0.058	6.05794e-211	MV
mt-Nd3	9.42284e-215	0.649471	0.862	0.663	1.82822e-210	MV
Ppp1r1a	1.2947e-209	0.744285	0.625	0.297	2.51198e-205	MV
Tmem30b	8.46694e-208	0.593079	0.283	0.073	1.64276e-203	MV
Stmn1	1.37032e-207	0.373274	0.875	0.574	2.6587e-203	MV
Cox6c	2.18961e-207	0.506211	0.963	0.881	4.24829e-203	MV
Cd2ap	1.0518e-205	0.705019	0.414	0.149	2.04071e-201	MV
S100a11	1.17786e-205	0.427738	0.8	0.432	2.28528e-201	MV
Tmem238	2.21281e-203	0.708693	0.372	0.125	4.2933e-199	MV
Igsf9	7.73723e-201	0.561551	0.253	0.061	1.50118e-196	MV
Zdhhc20	1.48251e-200	0.66826	0.379	0.13	2.87637e-196	MV
Ptch1	1.39705e-198	0.605052	0.315	0.09	2.71055e-194	MV
Sgk1	2.21616e-196	0.687265	0.363	0.119	4.29979e-192	MV
Atp6v1a	1.05654e-195	0.718673	0.634	0.342	2.04989e-191	MV
Pbxip1	1.79086e-195	0.587845	0.331	0.1	3.47463e-191	MV
Cldn7	2.52155e-195	0.655458	0.434	0.161	4.89231e-191	MV
Kidins220	2.37932e-191	0.650493	0.431	0.163	4.61635e-187	MV
Cdh1	8.96685e-191	0.596514	0.402	0.139	1.73975e-186	MV
Uqcrb	1.35037e-187	0.740992	0.88	0.722	2.61999e-183	MV
Trib1	1.54577e-184	0.546646	0.28	0.077	2.99911e-180	MV
Lgr4	2.46449e-184	0.573953	0.302	0.088	4.78161e-180	MV
Tmem9b	6.80254e-184	0.679829	0.425	0.168	1.31983e-179	MV
Hsd17b11	1.00944e-182	0.620542	0.338	0.11	1.95851e-178	MV
Rdx	1.64229e-182	0.679777	0.47	0.205	3.18638e-178	MV
Ogt	8.3902e-178	0.655754	0.662	0.386	1.62787e-173	MV
Cox8a	3.3804e-174	0.469647	0.971	0.9	6.55865e-170	MV
Laptm4a	1.63973e-172	0.622143	0.687	0.402	3.18141e-168	MV
Cds1	2.57124e-170	0.632967	0.404	0.156	4.98873e-166	MV
Meis2	2.17463e-169	0.55932	0.309	0.097	4.21922e-165	MV
mt-Nd5	4.94708e-166	0.459857	0.929	0.784	9.59833e-162	MV
Mprip	1.49226e-164	0.561976	0.35	0.124	2.89529e-160	MV
Pgrmc1	3.70813e-162	0.415118	0.727	0.417	7.19452e-158	MV
Fry	6.45517e-159	0.570429	0.333	0.116	1.25243e-154	MV
Aplp2	1.71638e-157	0.487585	0.898	0.707	3.33011e-153	MV
Cd63	2.09366e-157	0.463768	0.64	0.323	4.06213e-153	MV
Ank3	9.63097e-156	0.592721	0.619	0.337	1.8686e-151	MV
Uqcr11	1.21974e-153	0.539659	0.884	0.746	2.36654e-149	MV
[truncated: 6,594 more rows]

## Sheet: Enriched genes in OLF neurons
Enriched genes in different cell subsets identified from scRNA-seq analysis
gene	p_val	avg_logFC	pct.1	pct.2	p_val_adj	cluster
Slc6a6	0	2.47454	0.992	0.328	0	HBC-1
Igfbp2	0	2.00555	0.843	0.059	0	HBC-1
Gstm1	0	1.92478	0.969	0.327	0	HBC-1
Aqp3	0	1.87828	0.924	0.117	0	HBC-1			GO analysis
Trp63	0	1.87703	0.835	0.049	0	HBC-1			mOSN-1
Car12	0	1.85484	0.78	0.029	0	HBC-1			Term	P-Value
Krt5	0	1.71159	0.827	0.058	0	HBC-1			Cellular respiration	2e-25
Ccnd2	0	1.64671	0.725	0.05	0	HBC-1			Electron transport chain	4.2e-24
Sfrp1	0	1.63256	0.729	0.043	0	HBC-1			Respiratory electron transport chain	1.3e-21
Krt14	0	1.58111	0.751	0.062	0	HBC-1			Nucleoside metabolic process	5.3e-21
Wls	0	1.56059	0.802	0.112	0	HBC-1			Energy derivation by oxidation of organic compounds	7.2e-20
Fam101b	0	1.5566	0.655	0.063	0	HBC-1			Glycosyl compound metabolic process	8.9e-20
Aox2	0	1.55217	0.773	0.098	0	HBC-1			Oxidative phosphorylation	1.5e-19
Slc26a7	0	1.54964	0.686	0.034	0	HBC-1			Nucleoside phosphate metabolic process	5.6e-19
Crim1	0	1.53251	0.659	0.056	0	HBC-1			Ribose phosphate metabolic process	9.8e-19
Amotl1	0	1.52176	0.686	0.057	0	HBC-1			Purine-containing compound metabolism	3.5e-18
Scd2	0	1.50043	0.765	0.143	0	HBC-1
Vit	0	1.48285	0.641	0.02	0	HBC-1
Gstm2	0	1.47094	0.771	0.108	0	HBC-1
Aqp4	0	1.42977	0.724	0.078	0	HBC-1
Hpgd	0	1.4277	0.59	0.042	0	HBC-1			mOSN-2 (mainly WT)
Sult1e1	0	1.42759	0.531	0.056	0	HBC-1			Term	P-Value
Kitl	0	1.42348	0.586	0.03	0	HBC-1			Single-organism transport	1.9e-08
Nrcam	0	1.41102	0.592	0.016	0	HBC-1			System development	2e-07
Krt17	0	1.40101	0.686	0.05	0	HBC-1			Nervous system development	3.7e-07
Ifitm3	0	1.37771	0.837	0.175	0	HBC-1			Cell development	1.1e-06
Net1	0	1.37156	0.637	0.058	0	HBC-1			Cell differentiation	3.5e-06
Eya1	0	1.32027	0.637	0.081	0	HBC-1			Plasma membrane organization	3.6e-06
Wnt4	0	1.31653	0.559	0.035	0	HBC-1			Response to metal ion	6.9e-06
4631405K08Rik	0	1.29494	0.631	0.043	0	HBC-1			Modulation of synaptic transmission	6.9e-06
Zfp36l1	0	1.28759	0.669	0.106	0	HBC-1			Central nervous system development	8e-06
Fxyd3	0	1.28461	0.751	0.08	0	HBC-1			Cell-cell signaling	1e-05
Efemp1	0	1.28023	0.6	0.036	0	HBC-1
Mecom	0	1.25274	0.629	0.064	0	HBC-1
Pdgfa	0	1.25123	0.653	0.094	0	HBC-1
Dsp	0	1.25008	0.62	0.074	0	HBC-1			mOSN-3
Sema3d	0	1.24923	0.494	0.009	0	HBC-1			Term	P-Value
Igfbp4	0	1.2403	0.496	0.037	0	HBC-1			Nervous system development	9.2e-22
Cald1	0	1.22101	0.525	0.03	0	HBC-1			Cell part morphogenesis	9.6e-22
Sema5a	0	1.2166	0.516	0.013	0	HBC-1			Cell projection morphogenesis	2.8e-21
F3	0	1.20275	0.694	0.076	0	HBC-1			System development	4e-16
Ahnak	0	1.20228	0.596	0.052	0	HBC-1			Cell morphogenesis	2.4e-15
Clu	0	1.19332	0.669	0.098	0	HBC-1			Cellular component morphogenesis	9.3e-15
Dapl1	0	1.16608	0.651	0.085	0	HBC-1			Neuron development	6.4e-14
Epas1	0	1.1606	0.751	0.129	0	HBC-1			Cell development	7.6e-14
Pltp	0	1.14587	0.502	0.026	0	HBC-1			Neuron projection development	8e-14
Ogn	0	1.13239	0.4	0.01	0	HBC-1			Single-organism organelle organization	1.7e-13
Fmo2	0	1.10867	0.506	0.046	0	HBC-1
Abca4	0	1.09378	0.431	0.018	0	HBC-1
Dsc3	0	1.08216	0.459	0.022	0	HBC-1
Per3	0	1.0786	0.492	0.038	0	HBC-1			mOSN-4 (mainly KO)
Slc23a2	0	1.07254	0.525	0.051	0	HBC-1			Term	P-Value
Col23a1	0	1.06834	0.441	0.008	0	HBC-1			Ribose phosphate metabolism	2.9e-12
Fmo6	0	1.059	0.467	0.033	0	HBC-1			Nucleoside phosphate metabolism	3.5e-11
Sulf1	0	1.05317	0.418	0.014	0	HBC-1			Nucleobase-containing small molecule metabolism	9.1e-11
Slc39a10	0	1.04294	0.49	0.052	0	HBC-1			Purine-containing compound metabolism	1.1e-10
Lamb3	0	1.03333	0.49	0.031	0	HBC-1			Nucleoside metabolism	2e-10
Slc47a1	0	1.01625	0.424	0.014	0	HBC-1			Glycosyl compound metabolism	7e-10
Plpp3	0	1.01354	0.447	0.031	0	HBC-1			Electron transport chain	8.7e-09
Tns1	0	1.00064	0.427	0.017	0	HBC-1			Organophosphate metabolism	1.2e-08
Fam126a	0	0.994736	0.465	0.039	0	HBC-1			Respiratory electron transport chain	3.9e-08
Csrp1	0	0.985343	0.49	0.05	0	HBC-1			Detoxification	5.2e-07
Col17a1	0	0.984468	0.42	0.024	0	HBC-1
Bcam	0	0.974477	0.516	0.048	0	HBC-1
Tns3	0	0.965567	0.463	0.048	0	HBC-1
Snai2	0	0.937517	0.384	0.016	0	HBC-1
Pdpn	0	0.93138	0.406	0.033	0	HBC-1
Gja1	0	0.921997	0.369	0.02	0	HBC-1
Fgfr1	0	0.91181	0.404	0.024	0	HBC-1
Cers4	0	0.895194	0.396	0.029	0	HBC-1
Fads1	0	0.893797	0.422	0.038	0	HBC-1
Slc29a1	0	0.875467	0.361	0.019	0	HBC-1
Itgb4	0	0.847382	0.363	0.023	0	HBC-1
Fgfbp1	0	0.836665	0.361	0.021	0	HBC-1
Cachd1	0	0.783649	0.316	0.015	0	HBC-1
Trim29	0	0.781341	0.343	0.019	0	HBC-1
Arhgef26	0	0.773156	0.3	0.014	0	HBC-1
Kcnh1	0	0.762963	0.302	0.011	0	HBC-1
Cxcl12	0	0.70142	0.31	0.018	0	HBC-1
Fgf1	0	0.697484	0.306	0.015	0	HBC-1
Oplah	0	0.68743	0.298	0.014	0	HBC-1
Deptor	0	0.645217	0.243	0.008	0	HBC-1
Nr2e1	0	0.634484	0.265	0.012	0	HBC-1
Slc1a3	0	0.620252	0.235	0.007	0	HBC-1
Fermt1	0	0.580078	0.237	0.009	0	HBC-1
Car10	0	0.567757	0.214	0.003	0	HBC-1
Fmod	0	0.517661	0.204	0.005	0	HBC-1
Krt14	0	2.40437	0.934	0.076	0	HBC-2
Krt17	0	2.33274	0.888	0.062	0	HBC-2
Dapl1	0	2.25676	0.888	0.095	0	HBC-2
Abca4	0	2.19336	0.711	0.024	0	HBC-2
Igfbp2	0	2.1024	0.863	0.078	0	HBC-2
Fxyd3	0	2.0055	0.909	0.094	0	HBC-2
Hpgd	0	1.96367	0.802	0.052	0	HBC-2
Efemp1	0	1.95809	0.777	0.047	0	HBC-2
Krt5	0	1.87158	0.832	0.076	0	HBC-2
Fmo6	0	1.76645	0.67	0.041	0	HBC-2
Phlda3	0	1.65097	0.675	0.039	0	HBC-2
Adh7	0	2.64664	0.954	0.039	0	HBC-3
F3	0	2.50201	0.972	0.085	0	HBC-3
Fxyd3	0	2.26485	0.977	0.092	0	HBC-3
Gsto1	0	2.04297	0.857	0.079	0	HBC-3
Gsta4	0	1.96201	0.834	0.093	0	HBC-3
Krt14	0	1.9498	0.816	0.077	0	HBC-3
Cdo1	0	1.94544	0.825	0.058	0	HBC-3
Tmem176a	0	1.92331	0.866	0.093	0	HBC-3
Dapl1	0	1.84926	0.908	0.093	0	HBC-3
Krt19	0	1.83295	0.779	0.052	0	HBC-3
Aldh3a1	0	1.68903	0.719	0.041	0	HBC-3
Phlda3	0	1.65752	0.742	0.037	0	HBC-3
Krt5	0	1.6341	0.82	0.075	0	HBC-3
Ccdc3	0	1.6329	0.728	0.043	0	HBC-3
Gsta3	0	1.53677	0.687	0.056	0	HBC-3
Abi3bp	0	1.48048	0.599	0.029	0	HBC-3
Ly6a	0	1.47828	0.498	0.023	0	HBC-3
Serpina3n	0	1.44868	0.392	0.008	0	HBC-3
Tgm2	0	1.33724	0.53	0.027	0	HBC-3
Adh1	0	1.30058	0.507	0.018	0	HBC-3
S100a14	0	1.15451	0.521	0.019	0	HBC-3
Fmo3	0	1.09963	0.387	0.013	0	HBC-3
Anxa8	0	1.04874	0.396	0.015	0	HBC-3
Synpr	0	0.788898	0.217	0.003	0	HBC-3
Cyp2f2	0	2.47763	0.975	0.201	0	HBC-4
Gsto1	0	2.31162	0.767	0.075	0	HBC-4
Epas1	0	2.2242	0.959	0.133	0	HBC-4
Adh7	0	2.12159	0.827	0.035	0	HBC-4
Krt15	0	2.06264	0.569	0.024	0	HBC-4
Tgm2	0	1.92538	0.692	0.019	0	HBC-4
F3	0	1.91485	0.865	0.081	0	HBC-4
Ccdc3	0	1.83721	0.767	0.036	0	HBC-4
Fxyd3	0	1.60196	0.874	0.087	0	HBC-4
Abi3bp	0	1.46115	0.55	0.026	0	HBC-4
Ahnak	0	1.46016	0.714	0.058	0	HBC-4
Net1	0	1.40005	0.642	0.067	0	HBC-4
Mecom	0	1.31474	0.682	0.072	0	HBC-4
Ccnd2	0	1.31228	0.651	0.063	0	HBC-4
Aldh3a1	0	1.2946	0.569	0.039	0	HBC-4
Fmo3	0	1.20829	0.428	0.009	0	HBC-4
Cdo1	0	1.19563	0.613	0.057	0	HBC-4
Foxa1	0	1.08887	0.453	0.019	0	HBC-4
Sdc1	0	1.05166	0.516	0.035	0	HBC-4
Fgfr2	0	0.920492	0.39	0.016	0	HBC-4
Lgr6	0	0.790751	0.286	0.007	0	HBC-4
Lgi2	0	0.750251	0.292	0.005	0	HBC-4
Fgfr3	0	0.721208	0.305	0.01	0	HBC-4
Hes6	0	2.19554	0.939	0.209	0	GBC-1
Crabp2	0	1.68619	0.793	0.069	0	GBC-1
Mdk	0	1.67154	0.824	0.069	0	GBC-1
Ccnd1	0	1.59891	0.757	0.057	0	GBC-1
Id2	0	1.51303	0.804	0.123	0	GBC-1
Impdh2	0	1.5126	0.855	0.114	0	GBC-1
2810417H13Rik	0	1.45406	0.642	0.055	0	GBC-1
Cks1b	0	1.31287	0.74	0.077	0	GBC-1
Espn	0	1.2615	0.746	0.026	0	GBC-1
Ascl1	0	1.22065	0.598	0.007	0	GBC-1
Cenpf	0	1.1967	0.531	0.042	0	GBC-1
Cryab	0	1.17279	0.52	0.032	0	GBC-1
Atp6v1g3	0	1.15333	0.45	0.01	0	GBC-1
Mycl	0	1.10642	0.626	0.051	0	GBC-1
Npm3	0	1.03532	0.74	0.097	0	GBC-1
Spc24	0	1.03364	0.603	0.037	0	GBC-1
Mybl1	0	1.01543	0.48	0.016	0	GBC-1
Cdk1	0	1.01329	0.503	0.035	0	GBC-1
Cdca8	0	0.981555	0.556	0.033	0	GBC-1
Pbk	0	0.979178	0.536	0.026	0	GBC-1
Cox6b2	0	0.978865	0.542	0.022	0	GBC-1
Lockd	0	0.961548	0.578	0.049	0	GBC-1
Kit	0	0.918938	0.561	0.013	0	GBC-1
Ccnb1	0	0.904054	0.411	0.026	0	GBC-1
Pdlim4	0	0.902821	0.52	0.021	0	GBC-1
Cdca3	0	0.866158	0.492	0.037	0	GBC-1
Cdc20	0	0.858705	0.419	0.024	0	GBC-1
Pitx1	0	0.794042	0.575	0.053	0	GBC-1
Sp8	0	0.764761	0.517	0.04	0	GBC-1
Ociad2	0	0.74767	0.506	0.04	0	GBC-1
Hells	0	0.745636	0.436	0.028	0	GBC-1
Tgif1	0	0.733829	0.492	0.038	0	GBC-1
Mapk13	0	0.730898	0.517	0.032	0	GBC-1
Tead2	0	0.713336	0.5	0.021	0	GBC-1
Tmprss4	0	0.699332	0.425	0.006	0	GBC-1
Tyms	0	0.687887	0.45	0.03	0	GBC-1
Gad2	0	0.687232	0.383	0.019	0	GBC-1
Knstrn	0	0.66382	0.408	0.021	0	GBC-1
Tpx2	0	0.629221	0.397	0.023	0	GBC-1
Msx1	0	0.580614	0.274	0.008	0	GBC-1
Mcm3	0	0.573997	0.377	0.019	0	GBC-1
Cenpm	0	0.560085	0.385	0.012	0	GBC-1
Smoc2	0	0.534604	0.324	0.007	0	GBC-1
Uhrf1	0	0.517414	0.344	0.017	0	GBC-1
Dtl	0	0.513699	0.307	0.011	0	GBC-1
Neurod1	0	2.26558	0.994	0.061	0	GBC-2
Top2a	0	2.13761	0.885	0.075	0	GBC-2
2810417H13Rik	0	2.12677	0.873	0.061	0	GBC-2
Mdk	0	2.0653	0.891	0.08	0	GBC-2
Cenpf	0	1.8915	0.83	0.046	0	GBC-2
Scg2	0	1.86446	0.855	0.055	0	GBC-2
Ccnb1	0	1.70841	0.727	0.028	0	GBC-2
Cks1b	0	1.6983	0.939	0.084	0	GBC-2
Lockd	0	1.67075	0.873	0.053	0	GBC-2
Nusap1	0	1.6463	0.836	0.034	0	GBC-2
Cdk1	0	1.56896	0.739	0.039	0	GBC-2
Spc25	0	1.55522	0.794	0.03	0	GBC-2
Birc5	0	1.55005	0.806	0.054	0	GBC-2
Cdca8	0	1.53609	0.8	0.038	0	GBC-2
Cdca3	0	1.51242	0.788	0.04	0	GBC-2
Pbk	0	1.46922	0.788	0.03	0	GBC-2
Cdc20	0	1.41596	0.612	0.027	0	GBC-2
Mfng	0	1.40559	0.848	0.043	0	GBC-2
Cenpe	0	1.30748	0.673	0.026	0	GBC-2
Tpx2	0	1.29176	0.709	0.025	0	GBC-2
Rbm24	0	1.29172	0.782	0.045	0	GBC-2
Ccnb2	0	1.27576	0.679	0.036	0	GBC-2
Ccna2	0	1.15134	0.691	0.032	0	GBC-2
Hmmr	0	1.07058	0.545	0.019	0	GBC-2
Sult2b1	0	1.05207	0.582	0.02	0	GBC-2
Aurka	0	0.993048	0.594	0.024	0	GBC-2
Tacc3	0	0.960857	0.606	0.023	0	GBC-2
Poc1a	0	0.92633	0.552	0.021	0	GBC-2
Neurog1	0	0.901962	0.558	0.02	0	GBC-2
Kif11	0	0.866106	0.539	0.023	0	GBC-2
Kif22	0	0.823229	0.515	0.022	0	GBC-2
Nek2	0	0.816014	0.503	0.015	0	GBC-2
Ada	0	0.816004	0.539	0.018	0	GBC-2
Sgol1	0	0.809562	0.564	0.016	0	GBC-2
Mis18bp1	0	0.797774	0.461	0.015	0	GBC-2
Plk1	0	0.784559	0.503	0.015	0	GBC-2
Casc5	0	0.777029	0.564	0.019	0	GBC-2
Ncapg	0	0.757675	0.497	0.016	0	GBC-2
Shcbp1	0	0.736503	0.467	0.013	0	GBC-2
Cenpk	0	0.730495	0.491	0.017	0	GBC-2
Ckap2l	0	0.714487	0.448	0.015	0	GBC-2
Kif23	0	0.696233	0.473	0.014	0	GBC-2
Asf1b	0	0.687386	0.448	0.016	0	GBC-2
Aurkb	0	0.684131	0.436	0.015	0	GBC-2
Kif2c	0	0.667555	0.424	0.009	0	GBC-2
Nuf2	0	0.637633	0.442	0.013	0	GBC-2
Esco2	0	0.629328	0.412	0.013	0	GBC-2
St18	0	0.601125	0.4	0.011	0	GBC-2
Sapcd2	0	0.58011	0.388	0.009	0	GBC-2
Melk	0	0.567331	0.412	0.01	0	GBC-2
Kifc1	0	0.557089	0.376	0.009	0	GBC-2
Kif4	0	0.530792	0.406	0.011	0	GBC-2
Fam64a	0	0.522746	0.37	0.01	0	GBC-2
Ndc80	0	0.520474	0.364	0.009	0	GBC-2
Cep55	0	0.494964	0.345	0.007	0	GBC-2
Cdc25c	0	0.489255	0.297	0.006	0	GBC-2
Ankrd2	0	0.479976	0.248	0.003	0	GBC-2
Crabp1	0	2.07076	0.936	0.184	0	GBC-3
Smchd1	0	1.95885	0.955	0.237	0	GBC-3
Grp	0	1.91523	0.821	0.039	0	GBC-3
Ddah2	0	1.88747	0.931	0.159	0	GBC-3
Plk4	0	1.88735	0.84	0.099	0	GBC-3
Sult6b1	0	1.85207	0.657	0.042	0	GBC-3
Nhlh2	0	1.8463	0.921	0.108	0	GBC-3
Elavl4	0	1.8371	0.971	0.265	0	GBC-3
Ppp1r14a	0	1.79254	0.721	0.031	0	GBC-3
Gng8	0	1.73942	0.957	0.219	0	GBC-3
Neurod1	0	1.64004	0.695	0.052	0	GBC-3
Baz1a	0	1.58859	0.8	0.102	0	GBC-3
Pim3	0	1.51768	0.821	0.158	0	GBC-3
Gadd45a	0	1.44759	0.65	0.092	0	GBC-3
Hpcal1	0	1.44357	0.802	0.143	0	GBC-3
Scg2	0	1.42762	0.631	0.046	0	GBC-3
Grasp	0	1.29026	0.619	0.038	0	GBC-3
Mfng	0	1.24635	0.557	0.037	0	GBC-3
Col9a2	0	1.16311	0.548	0.045	0	GBC-3
Gm10631	0	1.11355	0.433	0.012	0	GBC-3
Mss51	0	1.08509	0.452	0.018	0	GBC-3
B630019K06Rik	0	1.06185	0.469	0.026	0	GBC-3
Pdlim7	0	0.957502	0.455	0.034	0	GBC-3
BC030867	0	0.935737	0.369	0.014	0	GBC-3
A330009N23Rik	0	0.681472	0.307	0.011	0	GBC-3
Baz1a	0	2.08067	0.918	0.11	0	GBC-4
Grp	0	1.38131	0.706	0.053	0	GBC-4
Cdyl2	0	1.35133	0.771	0.064	0	GBC-4
Stil	0	1.08842	0.58	0.033	0	GBC-4
Plekhg1	0	0.864112	0.489	0.024	0	GBC-4
Crabp1	0	2.63373	0.967	0.185	0	iOSN-1
Tex15	0	2.05563	0.843	0.091	0	iOSN-1
Col9a2	0	1.4345	0.517	0.048	0	iOSN-1
Gap43	0	2.40691	0.984	0.207	0	iOSN-2
Stmn1	0	1.86573	0.995	0.578	0	iOSN-2
Gng8	0	1.80793	0.892	0.2	0	iOSN-2
Calb2	0	1.7982	0.903	0.269	0	iOSN-2
Tmsb10	0	1.60678	0.995	0.766	0	iOSN-2
Tubb2b	0	1.44606	0.934	0.313	0	iOSN-2
Arhgdig	0	1.37682	0.819	0.241	0	iOSN-2
Stmn2	0	1.37335	0.998	0.615	0	iOSN-2
Insm1	0	1.30362	0.662	0.15	0	iOSN-2
Vim	0	1.22735	0.658	0.132	0	iOSN-2
Ly6h	0	1.16186	0.553	0.071	0	iOSN-2
Prph	0	1.1044	0.461	0.031	0	iOSN-2
Nrn1l	0	1.58701	0.984	0.453	0	mOSN-1
S100a5	0	1.50505	0.948	0.854	0	mOSN-1
Chchd10	0	1.28593	0.976	0.561	0	mOSN-1
Gm11992	0	1.20996	0.779	0.283	0	mOSN-1
Ckb	0	1.20378	0.988	0.736	0	mOSN-1
Pcp4l1	0	1.19677	0.672	0.421	0	mOSN-1
1700012B09Rik	0	1.16708	0.964	0.487	0	mOSN-1
Acbd7	0	1.09294	0.964	0.542	0	mOSN-1
Aldoa	0	1.08728	0.938	0.565	0	mOSN-1
Lrrc3b	0	1.0569	0.52	0.16	0	mOSN-1
Calm2	0	1.04259	1	0.971	0	mOSN-1
Jakmip1	0	1.01465	0.968	0.537	0	mOSN-1
Fam213b	0	1.00962	0.977	0.624	0	mOSN-1
Ctxn3	0	0.993768	0.903	0.469	0	mOSN-1
Fam131c	0	0.981541	0.796	0.332	0	mOSN-1
Gnb1	0	0.95606	0.99	0.921	0	mOSN-1
Ak1	0	0.95266	0.93	0.576	0	mOSN-1
Nxnl2	0	0.940566	0.597	0.211	0	mOSN-1
Nsg1	0	0.915436	0.996	0.762	0	mOSN-1
Pifo	0	0.886042	0.589	0.223	0	mOSN-1
Ypel3	0	0.879166	0.936	0.623	0	mOSN-1
Eno1	0	0.879068	0.822	0.469	0	mOSN-1
Chga	0	0.875199	0.98	0.663	0	mOSN-1
Pde6d	0	0.871698	0.895	0.563	0	mOSN-1
Efcab10	0	0.85421	0.783	0.4	0	mOSN-1
Dusp14	0	0.853495	0.619	0.256	0	mOSN-1
1110017D15Rik	0	0.845047	0.745	0.347	0	mOSN-1
Plekhb1	0	0.844038	0.945	0.58	0	mOSN-1
Nat14	0	0.840459	0.692	0.324	0	mOSN-1
Tstd1	0	0.818323	0.617	0.272	0	mOSN-1
Ndufv3	0	0.816858	0.965	0.724	0	mOSN-1
Cfap126	0	0.812246	0.507	0.196	0	mOSN-1
Cd81	0	0.806278	0.963	0.681	0	mOSN-1
Cox5b	0	0.805758	0.975	0.812	0	mOSN-1
Lpcat4	0	0.805414	0.524	0.185	0	mOSN-1
Rab3a	0	0.804525	0.647	0.295	0	mOSN-1
Abhd16a	0	0.801218	0.733	0.38	0	mOSN-1
Cystm1	0	0.788124	0.981	0.688	0	mOSN-1
Ndufb4	0	0.775802	0.888	0.591	0	mOSN-1
Tmem74bos	0	0.774198	0.825	0.441	0	mOSN-1
Tom1	0	0.773121	0.861	0.505	0	mOSN-1
Riiad1	0	0.772955	0.691	0.354	0	mOSN-1
Ppp1r1a	0	0.748378	0.653	0.328	0	mOSN-1
Calm1	0	0.748347	1	0.975	0	mOSN-1
Ptp4a3	0	0.736669	0.745	0.416	0	mOSN-1
Pgam1	0	0.734802	0.787	0.497	0	mOSN-1
Ndufb8	0	0.731735	0.871	0.587	0	mOSN-1
Ndufa13	0	0.724521	0.912	0.683	0	mOSN-1
Ubb	0	0.723018	0.999	0.96	0	mOSN-1
Mdh1	0	0.717617	0.895	0.671	0	mOSN-1
Hint1	0	0.71633	0.986	0.848	0	mOSN-1
Cycs	0	0.716297	0.823	0.552	0	mOSN-1
Them6	0	0.711001	0.728	0.381	0	mOSN-1
Fetub	0	0.705477	0.729	0.435	0	mOSN-1
Atox1	0	0.703645	0.989	0.874	0	mOSN-1
Faim2	0	0.701885	0.744	0.417	0	mOSN-1
Fkbp2	0	0.696012	0.714	0.438	0	mOSN-1
Atp5o	0	0.694144	0.917	0.694	0	mOSN-1
Rd3	0	0.692681	0.705	0.369	0	mOSN-1
Stom	0	0.692244	0.976	0.662	0	mOSN-1
Ppp1r14b	0	0.682812	0.73	0.462	0	mOSN-1
Gng13	0	0.679616	0.999	0.884	0	mOSN-1
Eif1	0	0.679394	0.996	0.941	0	mOSN-1
Arl3	0	0.678164	0.797	0.519	0	mOSN-1
Stoml3	0	0.675779	0.998	0.761	0	mOSN-1
Tubb4b	0	0.669672	0.934	0.741	0	mOSN-1
Tsc22d1	0	0.656384	0.864	0.674	0	mOSN-1
Mt1	0	0.647419	0.989	0.91	0	mOSN-1
Ndufa4	0	0.64399	0.99	0.885	0	mOSN-1
BC031181	0	0.640539	0.823	0.567	0	mOSN-1
Omp	0	0.636034	0.999	0.806	0	mOSN-1
Cox5a	0	0.634032	0.905	0.717	0	mOSN-1
Slc25a5	0	0.631088	0.945	0.782	0	mOSN-1
Serpine2	0	0.62759	0.93	0.633	0	mOSN-1
2010107E04Rik	0	0.622486	0.909	0.749	0	mOSN-1
Sult1d1	0	0.607108	0.907	0.618	0	mOSN-1
Atp5j	0	0.600329	0.948	0.775	0	mOSN-1
Cox8a	0	0.590276	0.979	0.887	0	mOSN-1
Mgst3	0	0.589639	0.947	0.647	0	mOSN-1
Uqcrq	0	0.586596	0.933	0.779	0	mOSN-1
Gapdh	0	0.578412	0.861	0.647	0	mOSN-1
Hspa8	0	0.569016	0.984	0.881	0	mOSN-1
Hmgn3	0	0.568952	0.967	0.807	0	mOSN-1
Gabarapl2	0	0.566057	0.868	0.675	0	mOSN-1
Uqcrb	0	0.539471	0.898	0.693	0	mOSN-1
Ube2s	0	0.517091	0.972	0.765	0	mOSN-1
Tshz2	0	0.465476	0.987	0.858	0	mOSN-1
Gfy	0	0.46029	0.974	0.771	0	mOSN-1
Tmsb4x	0	0.355214	1	1	0	mOSN-1
Wfdc18	0	1.56352	0.984	0.448	0	mOSN-2
Cyp2a5	0	1.56318	0.812	0.266	0	mOSN-2
Cyp2g1	0	1.47747	0.734	0.234	0	mOSN-2
Rgs5	0	1.4012	0.679	0.209	0	mOSN-2
Obp1a	0	1.33423	0.891	0.341	0	mOSN-2
mt-Nd4l	0	1.28066	0.957	0.593	0	mOSN-2
Obp1b	0	1.27597	0.691	0.244	0	mOSN-2
mt-Nd2	0	1.19489	1	0.957	0	mOSN-2
Gm42418	0	1.13941	0.989	0.421	0	mOSN-2
Lcn11	0	1.08504	0.494	0.146	0	mOSN-2
mt-Nd5	0	1.05654	0.965	0.757	0	mOSN-2
mt-Nd4	0	1.00199	1	0.998	0	mOSN-2
Bpifa1	0	0.97397	0.879	0.501	0	mOSN-2
mt-Nd1	0	0.914318	1	1	0	mOSN-2
Hba-a1	0	0.888818	0.992	0.561	0	mOSN-2
mt-Atp8	0	0.888413	0.937	0.559	0	mOSN-2
mt-Cytb	0	0.852242	1	1	0	mOSN-2
mt-Co3	0	0.838578	1	1	0	mOSN-2
mt-Co1	0	0.753132	1	1	0	mOSN-2
Apoe	0	0.7486	0.877	0.506	0	mOSN-2
Scgb1c1	0	0.740457	0.959	0.681	0	mOSN-2
Hba-a2	0	0.728077	0.843	0.442	0	mOSN-2
Hbb-bs	0	0.714996	0.997	0.665	0	mOSN-2
mt-Atp6	0	0.69215	1	1	0	mOSN-2
mt-Co2	0	0.637806	1	1	0	mOSN-2
Obp2a	0	0.606008	0.846	0.339	0	mOSN-2
S100a9	0	0.604896	0.94	0.579	0	mOSN-2
S100a8	0	0.556028	0.98	0.647	0	mOSN-2
Cbr2	0	0.470928	0.826	0.355	0	mOSN-2
Lcn3	0	1.67954	0.49	0.096	0	mOSN-3
Obp2a	0	1.61539	0.845	0.322	0	mOSN-3
Hbb-bt	0	1.24899	0.906	0.383	0	mOSN-3
Hbb-bs	0	1.096	0.999	0.653	0	mOSN-3
Hba-a1	0	1.04903	0.996	0.546	0	mOSN-3
S100a8	0	0.947038	0.981	0.635	0	mOSN-3
mt-Atp8	0	0.940522	0.968	0.54	0	mOSN-3
Gm42418	0	0.935087	0.978	0.404	0	mOSN-3
Gnal	0	0.932742	0.972	0.728	0	mOSN-3
Ttll6	0	0.912469	0.66	0.207	0	mOSN-3
Hba-a2	0	0.907451	0.89	0.419	0	mOSN-3
S100a9	0	0.906535	0.952	0.564	0	mOSN-3
Myo6	0	0.897342	0.904	0.554	0	mOSN-3
Mup5	0	0.876838	0.478	0.084	0	mOSN-3
Obp1a	0	0.830063	0.905	0.32	0	mOSN-3
Flrt1	0	0.827972	0.771	0.353	0	mOSN-3
Cmip	0	0.819299	0.925	0.658	0	mOSN-3
Wfdc18	0	0.807953	0.973	0.432	0	mOSN-3
Mup4	0	0.791755	0.568	0.151	0	mOSN-3
Dnajb14	0	0.783819	0.771	0.386	0	mOSN-3
Kcna2	0	0.768913	0.603	0.206	0	mOSN-3
Purb	0	0.763367	0.714	0.321	0	mOSN-3
Fstl5	0	0.727369	0.988	0.857	0	mOSN-3
Malat1	0	0.555147	1	0.999	0	mOSN-3
Smc2	7.93526e-308	1.35537	0.867	0.071	1.5396e-303	GBC-2
Mex3a	1.0643e-307	1.49684	0.835	0.094	2.06496e-303	GBC-4
Birc5	1.17002e-307	1.01146	0.542	0.05	2.27007e-303	GBC-1
Fat2	1.64153e-307	0.751406	0.331	0.022	3.18489e-303	HBC-1
Tuba1a	7.95101e-307	1.0526	0.999	0.9	1.54266e-302	iOSN-2
Aplp1	8.41156e-307	0.514591	0.894	0.642	1.63201e-302	mOSN-1
Adipor1	8.43756e-307	0.61499	0.801	0.543	1.63705e-302	mOSN-1
Pik3r1	2.47929e-306	1.09478	0.549	0.073	4.81032e-302	HBC-1
2700097O09Rik	3.36886e-306	1.15773	0.583	0.071	6.53626e-302	GBC-3
Oaz2	3.50985e-306	0.682109	0.697	0.433	6.80981e-302	mOSN-1
Krt5	5.8658e-306	1.38636	0.679	0.073	1.13808e-301	HBC-4
Cotl1	7.26616e-306	1.78837	0.974	0.315	1.40978e-301	GBC-3
Ackr3	1.80658e-305	0.703333	0.3	0.018	3.50513e-301	HBC-1
Trp63	2.16066e-305	1.90528	0.777	0.069	4.19211e-301	HBC-2
Kif20a	3.12767e-305	0.599272	0.388	0.012	6.06831e-301	GBC-2
Rsph1	3.23848e-305	0.714756	0.548	0.248	6.2833e-301	mOSN-1
Defb1	6.2534e-305	0.92053	0.384	0.021	1.21329e-300	HBC-4
Mpc1	7.85174e-305	0.613955	0.763	0.51	1.52339e-300	mOSN-1
Msi2	1.15571e-304	0.678204	0.894	0.606	2.2423e-300	mOSN-3
Defb1	1.95533e-304	1.1802	0.456	0.023	3.79373e-300	HBC-3
Cenpe	2.19364e-303	0.664458	0.391	0.024	4.2561e-299	GBC-1
Gadd45g	2.57138e-303	1.23814	0.595	0.061	4.98899e-299	GBC-1
Qdpr	2.93869e-303	1.58912	0.918	0.206	5.70164e-299	iOSN-1
Mki67	3.2842e-303	1.30064	0.776	0.056	6.37201e-299	GBC-2
Ly6a	4.20526e-303	1.1329	0.387	0.022	8.15905e-299	HBC-4
Knstrn	7.20694e-303	0.90033	0.533	0.025	1.39829e-298	GBC-2
Nhlh2	7.89786e-303	1.68669	0.926	0.12	1.53234e-298	GBC-4
Gucy2c	1.18188e-302	0.67196	0.219	0.006	2.29307e-298	iOSN-1
Perp	2.33211e-302	1.00691	0.539	0.068	4.52476e-298	HBC-1
Atp1b1	2.46063e-302	0.436441	0.98	0.824	4.77411e-298	mOSN-1
Lmo1	3.87298e-302	1.67125	0.581	0.07	7.51437e-298	iOSN-1
Olfm1	6.1502e-302	0.528605	0.863	0.541	1.19326e-297	mOSN-1
Slc15a2	1.07313e-300	0.978532	0.488	0.056	2.08208e-296	HBC-1
Spc24	1.34591e-300	1.02957	0.697	0.044	2.61133e-296	GBC-2
Cldn7	1.51499e-300	1.12053	0.749	0.102	2.93937e-296	GBC-1
Ackr4	1.75764e-300	0.596548	0.229	0.009	3.41018e-296	HBC-1
Anxa8	2.78149e-300	0.833043	0.314	0.014	5.39665e-296	HBC-4
Ccna2	8.84102e-299	0.63553	0.422	0.029	1.71533e-294	GBC-1
Thsd7b	1.19911e-298	1.07089	0.606	0.045	2.32651e-294	GBC-4
Sgol2a	1.27519e-298	0.656091	0.406	0.014	2.47413e-294	GBC-2
Rbms3	2.40733e-298	0.868241	0.41	0.038	4.67069e-294	HBC-1
Ska1	8.85397e-298	0.505272	0.352	0.01	1.71785e-293	GBC-2
Cartpt	3.79802e-297	0.739553	0.738	0.445	7.36891e-293	mOSN-1
Kif20b	5.75022e-297	0.456538	0.31	0.015	1.11566e-292	GBC-1
Pla2r1	9.64884e-297	0.945659	0.402	0.037	1.87207e-292	HBC-1
Aldh6a1	3.58538e-296	0.798943	0.369	0.03	6.95636e-292	HBC-1
Wnt4	4.31283e-295	1.14145	0.522	0.044	8.36776e-291	HBC-4
Bcl2l12	5.92468e-295	0.507807	0.349	0.019	1.14951e-290	GBC-1
Aqp3	1.15332e-294	1.36171	0.871	0.131	2.23768e-290	HBC-4
Cox4i1	1.96739e-294	0.374795	0.983	0.937	3.81713e-290	mOSN-1
Cacnb3	2.34442e-294	0.682758	0.641	0.343	4.54865e-290	mOSN-1
Rab28	5.82528e-293	0.660772	0.67	0.403	1.13022e-288	mOSN-1
Top2a	7.66563e-293	1.38502	0.609	0.07	1.48729e-288	GBC-1
Urah	1.46851e-292	1.00135	0.392	0.017	2.84919e-288	HBC-3
Aqp3	5.5478e-292	2.10807	0.963	0.135	1.07638e-287	HBC-3
Marcksl1	1.17682e-291	1.08085	0.851	0.287	2.28326e-287	iOSN-2
Trim59	1.5842e-291	0.97193	0.655	0.04	3.07367e-287	GBC-2
Stxbp6	3.75462e-291	0.885199	0.373	0.032	7.28471e-287	HBC-1
Pkm	4.4046e-291	0.50473	0.9	0.73	8.5458e-287	mOSN-1
Hspb1	3.58006e-290	1.80047	0.774	0.082	6.94603e-286	HBC-3
Aqp3	7.81731e-290	2.43793	0.975	0.136	1.51671e-285	HBC-2
Cbr2	7.91416e-290	1.53328	0.988	0.396	1.5355e-285	HBC-1
Selm	1.19853e-289	2.62065	0.998	0.486	2.32539e-285	GBC-3
Foxa1	1.42297e-289	1.02082	0.447	0.023	2.76085e-285	HBC-3
Ube2c	2.12626e-289	2.38583	0.873	0.084	4.12537e-285	GBC-2
Crabp2	2.56699e-289	1.59944	0.879	0.079	4.98047e-285	GBC-2
Wfdc2	3.06881e-289	1.63992	0.89	0.162	5.95411e-285	HBC-4
Olfm1	3.24026e-289	0.689876	0.902	0.586	6.28676e-285	mOSN-3
Neil3	2.98559e-288	0.454426	0.285	0.012	5.79265e-284	GBC-1
Kif20b	1.028e-287	0.598485	0.442	0.017	1.99453e-283	GBC-2
Sema3c	1.97081e-287	0.542377	0.208	0.005	3.82376e-283	HBC-4
Anxa3	9.59496e-286	1.20979	0.479	0.028	1.86161e-281	HBC-3
Bub1	1.41546e-285	0.498537	0.339	0.01	2.74628e-281	GBC-2
Sox11	1.65042e-285	1.77241	0.998	0.352	3.20215e-281	GBC-3
Ugt2a1	2.11367e-285	0.697608	0.284	0.017	4.10094e-281	HBC-1
Snca	2.50654e-285	0.647409	0.792	0.543	4.86319e-281	mOSN-1
Mgst3	3.07206e-285	1.01794	0.988	0.721	5.9604e-281	iOSN-2
Camk2n1	7.23139e-285	1.19963	0.621	0.145	1.40303e-280	iOSN-2
Zmiz1	1.32522e-284	0.701229	0.762	0.384	2.57119e-280	mOSN-3
Umodl1	2.63266e-284	0.662587	0.871	0.522	5.10789e-280	mOSN-3
Dand5	4.79017e-284	1.04419	0.517	0.058	9.29388e-280	GBC-3
Nusap1	1.35309e-283	0.807162	0.433	0.033	2.62526e-279	GBC-1
Smc2	2.71036e-283	0.914055	0.601	0.067	5.25864e-279	GBC-1
Tubb5	3.91584e-283	1.3227	0.957	0.522	7.5975e-279	iOSN-2
Lmnb1	5.60633e-283	0.873792	0.595	0.066	1.08774e-278	GBC-1
Phlda3	7.09082e-283	0.742314	0.39	0.035	1.37576e-278	HBC-1
Mettl7a1	7.15647e-283	1.18209	0.663	0.117	1.3885e-278	HBC-1
Zfp341	8.89008e-283	0.77583	0.329	0.021	1.72485e-278	GBC-3
Ndufc2	1.7936e-282	0.54685	0.804	0.593	3.47995e-278	mOSN-1
Krt17	1.9278e-282	1.55561	0.705	0.064	3.74033e-278	HBC-3
Plec	3.29975e-282	0.828811	0.375	0.033	6.40218e-278	HBC-1
Atp5j2	1.78833e-281	0.477935	0.898	0.763	3.46972e-277	mOSN-1
Gpc3	1.88124e-281	0.760856	0.28	0.011	3.64999e-277	HBC-4
Dbf4	2.41212e-281	0.493063	0.366	0.023	4.68e-277	GBC-1
Gm14226	5.96201e-281	0.517065	0.26	0.007	1.15675e-276	GBC-4
Perp	1.32587e-280	1.55386	0.742	0.075	2.57244e-276	HBC-3
Fmo2	4.28144e-280	1.23872	0.547	0.052	8.30686e-276	HBC-4
Sgol1	1.04777e-279	0.394805	0.307	0.015	2.03288e-275	GBC-1
Rsph9	1.83489e-279	0.662786	0.568	0.278	3.56006e-275	mOSN-1
Igfbp5	3.61276e-279	1.4797	0.604	0.1	7.00948e-275	HBC-1
Epas1	2.66949e-278	1.96604	0.949	0.14	5.17935e-274	HBC-3
Arl14epl	2.80443e-278	1.4813	0.889	0.212	5.44116e-274	iOSN-1
Gclm	8.88936e-278	1.54561	0.849	0.256	1.72471e-273	HBC-1
Ect2	5.57656e-277	0.723649	0.442	0.018	1.08196e-272	GBC-2
Krt15	1.34575e-276	2.21427	0.484	0.03	2.61103e-272	HBC-3
Pebp1	1.48604e-276	1.39302	0.939	0.213	2.88322e-272	GBC-1
Adhfe1	1.53316e-276	0.431855	0.271	0.012	2.97463e-272	GBC-1
Cend1	2.14404e-276	0.708208	0.491	0.21	4.15987e-272	mOSN-1
Spc25	2.28553e-276	0.640888	0.408	0.03	4.43438e-272	GBC-1
Fezf1	2.75909e-276	1.28484	0.838	0.176	5.35319e-272	GBC-3
Fat2	3.36135e-276	0.839175	0.393	0.025	6.5217e-272	HBC-4
Ndufs7	3.68936e-276	0.611216	0.7	0.453	7.1581e-272	mOSN-1
Vegfa	5.48577e-276	1.03866	0.415	0.029	1.06435e-271	HBC-4
Fam181b	2.24724e-275	0.615002	0.267	0.013	4.36009e-271	GBC-3
Chchd2	2.90199e-275	0.384347	0.973	0.871	5.63044e-271	mOSN-1
Iscu	2.96485e-275	0.652297	0.62	0.347	5.7524e-271	mOSN-1
Ptbp3	9.89105e-275	0.726715	0.704	0.339	1.91906e-270	mOSN-3
Cenpa	3.12974e-274	1.71103	0.691	0.051	6.07232e-270	GBC-2
Cisd1	6.62185e-274	0.591592	0.724	0.476	1.28477e-269	mOSN-1
Aspm	9.78836e-274	0.607614	0.37	0.012	1.89914e-269	GBC-2
Btbd17	2.04284e-273	0.729946	0.339	0.01	3.96352e-269	GBC-2
Arhgap11a	2.07085e-273	0.703763	0.479	0.022	4.01785e-269	GBC-2
Ppargc1a	3.1402e-273	0.721268	0.485	0.148	6.09262e-269	mOSN-3
Ehf	3.63506e-273	0.87337	0.374	0.023	7.05275e-269	HBC-4
Ttll7	7.30659e-273	0.652934	0.867	0.57	1.41762e-268	mOSN-3
Ooep	9.60484e-273	0.949741	0.398	0.034	1.86353e-268	GBC-3
Csrp1	9.62883e-273	1.75071	0.67	0.058	1.86819e-268	HBC-2
Spcs1	1.57595e-272	0.540929	0.803	0.585	3.05766e-268	mOSN-1
Kcnj16	2.02236e-272	0.68743	0.201	0.005	3.92378e-268	HBC-4
Perp	2.90354e-272	1.27316	0.629	0.072	5.63345e-268	HBC-4
Crlf1	3.45447e-272	1.32856	0.618	0.051	6.70236e-268	HBC-3
Ccsap	3.69842e-272	0.793372	0.4	0.034	7.17567e-268	GBC-3
Ptpn14	8.60336e-272	0.604012	0.255	0.014	1.66922e-267	HBC-1
Oat	9.63938e-272	1.23336	0.607	0.068	1.87023e-267	HBC-4
Dpysl3	2.34463e-271	0.983976	0.689	0.177	4.54906e-267	iOSN-2
Ftl1	4.21405e-271	0.972305	0.995	0.838	8.1761e-267	iOSN-2
Rad51	1.25813e-270	0.365054	0.279	0.013	2.44103e-266	GBC-1
Stmn3	1.28912e-270	1.06249	0.957	0.613	2.50115e-266	iOSN-2
Camk2d	7.83409e-270	0.6613	0.831	0.502	1.51997e-265	mOSN-3
Ephx1	1.00295e-269	0.895807	0.424	0.046	1.94592e-265	HBC-1
Cngb1	1.36413e-269	0.697301	0.645	0.262	2.64669e-265	mOSN-3
Dynlrb2	2.26379e-269	0.67416	0.558	0.277	4.39221e-265	mOSN-1
Adh1	3.21189e-269	0.772093	0.34	0.019	6.2317e-265	HBC-4
Hbb-bs	3.59348e-269	0.990583	0.993	0.697	6.97207e-265	mOSN-4
Aox3	1.8105e-268	0.719232	0.28	0.012	3.51272e-264	HBC-4
Sox2	2.14643e-268	0.782132	0.612	0.07	4.16449e-264	GBC-1
Fut9	1.2825e-267	0.369935	0.24	0.009	2.48831e-263	GBC-1
Casc5	1.47583e-266	0.483048	0.318	0.018	2.86341e-262	GBC-1
Mybl1	2.63666e-266	0.826767	0.485	0.023	5.11565e-262	GBC-2
Gm10282	3.92067e-266	0.424626	0.335	0.02	7.60689e-262	GBC-1
Smc4	7.51953e-266	1.646	0.909	0.101	1.45894e-261	GBC-2
Ube2t	1.27724e-265	0.787304	0.515	0.027	2.4781e-261	GBC-2
Ifitm1	1.39005e-265	2.05464	0.848	0.114	2.69698e-261	HBC-3
Car12	5.89752e-265	1.52416	0.629	0.05	1.14424e-260	HBC-2
Bub1b	1.23782e-264	0.340081	0.271	0.012	2.40162e-260	GBC-1
Gm6086	1.6914e-264	0.896194	0.39	0.02	3.28166e-260	GBC-4
Kcnb1	1.72969e-264	0.66502	0.441	0.125	3.35595e-260	mOSN-3
Prex1	3.3606e-264	0.91072	0.537	0.04	6.52023e-260	GBC-4
Gnas	4.26859e-264	1.49496	0.919	0.256	8.28191e-260	GBC-3
Ces1d	8.28316e-264	1.18911	0.663	0.123	1.6071e-259	HBC-1
Rbm24	8.78816e-264	1.02265	0.567	0.045	1.70508e-259	GBC-4
Depdc1a	2.06438e-263	0.451898	0.309	0.009	4.0053e-259	GBC-2
Ift43	2.91366e-263	0.599289	0.706	0.459	5.65308e-259	mOSN-1
Cox6a1	5.50499e-263	0.415868	0.946	0.846	1.06808e-258	mOSN-1
Sdhb	1.09214e-262	0.577958	0.733	0.492	2.11896e-258	mOSN-1
Mcm2	1.09957e-262	0.491484	0.335	0.02	2.13339e-258	GBC-1
Cdk4	1.36076e-262	1.28629	0.905	0.199	2.64015e-258	GBC-1
Prc1	1.57176e-262	1.16142	0.648	0.045	3.04953e-258	GBC-2
Hlf	1.98032e-262	0.854483	0.378	0.037	3.84221e-258	HBC-1
Ltbp4	3.96387e-262	1.00768	0.443	0.035	7.69069e-258	HBC-4
Xdh	8.0725e-262	0.681927	0.267	0.016	1.56623e-257	HBC-1
Pak3	8.4968e-262	0.710183	0.531	0.187	1.64855e-257	mOSN-3
Cdca2	2.18e-261	0.537209	0.345	0.011	4.22963e-257	GBC-2
Ung	3.66187e-261	0.556848	0.257	0.011	7.10475e-257	GBC-1
Sdc1	3.96116e-261	0.78129	0.365	0.034	7.68544e-257	HBC-1
Cmtm8	6.03817e-261	0.488052	0.355	0.023	1.17152e-256	GBC-1
Kirrel2	8.07091e-261	0.734147	0.507	0.226	1.56592e-256	mOSN-1
Mdm1	1.07968e-260	1.08177	0.64	0.1	2.0948e-256	GBC-3
Dnase2a	1.19842e-260	0.952515	0.457	0.049	2.32518e-256	GBC-3
Dnajb13	1.58383e-260	0.665943	0.373	0.122	3.07295e-256	mOSN-1
Gpx4	2.17152e-260	0.4183	0.92	0.77	4.21317e-256	mOSN-1
Cenpa	2.3588e-260	1.09834	0.483	0.048	4.57654e-256	GBC-1
Dlx5	5.26443e-260	1.01872	0.393	0.034	1.0214e-255	iOSN-1
Gm14744	8.1025e-260	1.03995	0.446	0.143	1.57205e-255	mOSN-2
Ccnb2	8.34016e-260	0.710278	0.416	0.033	1.61816e-255	GBC-1
Trp63	1.14177e-259	1.07449	0.61	0.067	2.21527e-255	HBC-4
Fmo1	1.03879e-258	1.02116	0.35	0.015	2.01545e-254	HBC-3
1500009L16Rik	1.1669e-258	0.60989	0.229	0.012	2.26401e-254	HBC-1
Tmem176b	1.22281e-257	1.97087	0.894	0.137	2.3725e-253	HBC-3
Tmem176a	1.39475e-257	1.19432	0.689	0.091	2.70609e-253	HBC-4
S100a16	1.07234e-256	1.30785	0.585	0.048	2.08056e-252	HBC-3
Kif18a	1.17795e-256	0.506743	0.333	0.011	2.28546e-252	GBC-2
Emp2	1.84553e-256	0.640643	0.269	0.017	3.58069e-252	HBC-1
Mnd1	1.93259e-256	0.331659	0.232	0.009	3.7496e-252	GBC-1
2310030G06Rik	2.85489e-256	0.358323	0.243	0.01	5.53906e-252	GBC-1
Selk	3.34107e-256	0.416566	0.943	0.794	6.48234e-252	mOSN-1
Itgb5	4.6242e-256	0.608425	0.271	0.018	8.97188e-252	HBC-1
Nme5	5.19897e-256	0.679639	0.457	0.191	1.0087e-251	mOSN-1
Nasp	6.48203e-256	1.18205	0.737	0.118	1.25764e-251	GBC-1
Gstm1	6.76165e-256	0.493278	0.668	0.302	1.31189e-251	mOSN-2
Pkib	7.32794e-256	0.559835	0.7	0.405	1.42177e-251	mOSN-1
Nhlh1	8.65473e-256	0.978017	0.562	0.075	1.67919e-251	GBC-3
Akr1b3	4.30566e-255	0.496785	0.413	0.033	8.35384e-251	GBC-1
Thbs1	6.40016e-255	0.805136	0.292	0.021	1.24176e-250	HBC-1
Egfr	1.20519e-254	0.57026	0.241	0.013	2.3383e-250	HBC-1
Pex5l	1.61848e-254	0.688469	0.666	0.299	3.14018e-250	mOSN-3
Mis18bp1	1.63844e-254	0.417123	0.274	0.013	3.1789e-250	GBC-1
Prdx2	2.79791e-254	1.80087	1	0.67	5.42851e-250	GBC-3
Upk1b	2.95618e-253	0.626417	0.267	0.017	5.73558e-249	HBC-1
Bub1	2.99137e-253	0.318824	0.221	0.008	5.80385e-249	GBC-1
Pcolce	1.29517e-252	0.844667	0.29	0.01	2.51288e-248	HBC-3
Fras1	3.63166e-252	0.67317	0.276	0.019	7.04615e-248	HBC-1
Crlf1	4.70287e-252	1.4507	0.619	0.052	9.12452e-248	HBC-2
Tacc3	4.84243e-252	0.457653	0.338	0.022	9.39529e-248	GBC-1
Manea	5.16104e-252	0.670476	0.752	0.387	1.00134e-247	mOSN-3
Six3	1.00759e-251	0.873258	0.441	0.055	1.95493e-247	HBC-1
4631405K08Rik	2.65861e-251	1.03634	0.535	0.054	5.15823e-247	HBC-4
Gng8	2.76779e-251	1.58337	0.895	0.223	5.37007e-247	iOSN-1
Cenpp	5.93732e-251	0.323512	0.237	0.01	1.15196e-246	GBC-1
Hdac2	7.07902e-251	1.87726	0.941	0.33	1.37347e-246	iOSN-1
Obp1b	2.10578e-250	0.589787	0.634	0.241	4.08563e-246	mOSN-3
Ptma	2.51887e-250	1.78524	1	0.996	4.88712e-246	GBC-3
Gas2l3	8.694e-250	0.568651	0.345	0.012	1.68681e-245	GBC-2
Omp	8.93062e-250	0.491149	0.993	0.839	1.73272e-245	mOSN-3
Il6st	2.39961e-249	1.18644	0.651	0.129	4.65572e-245	HBC-1
Sub1	2.49937e-249	0.887469	0.993	0.891	4.84927e-245	iOSN-2
Isl1	3.45997e-249	0.838362	0.393	0.029	6.71304e-245	HBC-4
S100a6	3.92416e-249	1.96608	0.921	0.23	7.61366e-245	HBC-4
Nek2	5.15457e-249	0.391884	0.279	0.014	1.00009e-244	GBC-1
Selt	9.7988e-249	0.631208	0.866	0.596	1.90116e-244	mOSN-3
Nuak1	2.72631e-248	0.96901	0.511	0.039	5.28958e-244	GBC-4
Meis2	4.739e-248	1.1256	0.538	0.058	9.19461e-244	HBC-4
Hn1	1.70374e-247	1.0834	0.841	0.328	3.30559e-243	iOSN-2
Hn1	2.7746e-247	1.47678	0.96	0.34	5.38327e-243	GBC-3
Zmat4	2.96704e-247	0.326811	0.224	0.004	5.75666e-243	GBC-2
Rps27	3.65235e-247	1.35368	1	0.962	7.0863e-243	HBC-1
Sct	5.93131e-247	0.92902	0.285	0.008	1.15079e-242	GBC-2
Fgfbp1	6.12104e-247	1.45589	0.457	0.027	1.1876e-242	HBC-2
Cenpk	7.47652e-247	0.411576	0.288	0.016	1.45059e-242	GBC-1
Arl6	8.82013e-247	0.620211	0.574	0.317	1.71128e-242	mOSN-1
Aldh1l1	1.82976e-246	0.519261	0.218	0.011	3.5501e-242	HBC-1
Runx1	4.76517e-246	0.840197	0.606	0.076	9.24538e-242	GBC-1
Itpr1	6.08162e-246	0.783917	0.357	0.035	1.17996e-241	HBC-1
Slc1a2	9.55005e-246	0.700419	0.536	0.192	1.8529e-241	mOSN-3
Wfdc2	2.79933e-245	2.32774	0.931	0.167	5.43127e-241	HBC-3
Pcolce2	3.90013e-245	0.581188	0.716	0.452	7.56703e-241	mOSN-1
Kif19a	4.44507e-245	0.94009	0.552	0.077	8.62432e-241	GBC-3
Snap25	5.84356e-245	0.581288	0.7	0.427	1.13377e-240	mOSN-1
Rexo2	1.17308e-244	0.609064	0.598	0.338	2.27602e-240	mOSN-1
Nudc	1.32026e-244	0.575473	0.712	0.483	2.56157e-240	mOSN-1
Trp53	2.0621e-244	0.675337	0.55	0.063	4.00089e-240	GBC-1
Igsf9	2.35834e-244	1.02811	0.661	0.05	4.57564e-240	GBC-2
Golga4	4.60239e-244	0.693915	0.61	0.266	8.92955e-240	mOSN-3
Smarcd2	4.90885e-244	1.33562	0.864	0.232	9.52414e-240	GBC-3
Dlgap5	8.70498e-244	0.526505	0.358	0.013	1.68894e-239	GBC-2
Adam28	1.9433e-243	1.08136	0.618	0.117	3.77038e-239	HBC-1
Marcksl1	3.15973e-243	1.34958	0.948	0.301	6.1305e-239	GBC-3
Fbxo5	4.06973e-243	0.629439	0.448	0.022	7.89609e-239	GBC-2
Sp8	5.39491e-243	1.06633	0.63	0.045	1.04672e-238	GBC-2
Pde1c	5.05912e-242	0.687054	0.769	0.438	9.81571e-238	mOSN-3
Xpot	5.29634e-242	0.938285	0.617	0.083	1.0276e-237	GBC-1
Hes1	3.12826e-241	1.00646	0.518	0.078	6.06945e-237	HBC-1
Id1	3.95889e-241	1.08519	0.64	0.09	7.68104e-237	GBC-1
Syt11	5.87258e-241	0.649964	0.785	0.456	1.1394e-236	mOSN-3
Ajuba	7.02583e-241	0.503787	0.218	0.011	1.36315e-236	HBC-1
Obp2b	7.84026e-241	1.08737	0.314	0.069	1.52117e-236	mOSN-3
Dlg2	1.87031e-240	1.65403	0.39	0.155	3.62877e-236	mOSN-1
Ncapg2	4.26198e-240	0.613948	0.71	0.336	8.26909e-236	mOSN-3
Calm3	4.93927e-240	0.488457	0.844	0.662	9.58317e-236	mOSN-1
Vit	5.25202e-240	1.28653	0.523	0.037	1.019e-235	HBC-2
Plk1	7.52444e-240	0.395461	0.268	0.014	1.45989e-235	GBC-1
Racgap1	3.95645e-239	1.41394	0.842	0.09	7.6763e-235	GBC-2
Rrm2	1.96903e-238	0.680273	0.385	0.031	3.8203e-234	GBC-1
Socs2	2.22421e-238	1.17756	0.688	0.218	4.31542e-234	iOSN-2
Meig1	3.12883e-238	0.639339	0.469	0.208	6.07055e-234	mOSN-1
Cotl1	3.60882e-238	1.52643	0.949	0.318	7.00183e-234	iOSN-1
Ncapg	9.74971e-238	0.397832	0.274	0.015	1.89164e-233	GBC-1
Krt19	2.16947e-237	1.56904	0.619	0.055	4.20921e-233	HBC-2
Zfp36l1	2.36461e-237	1.35771	0.717	0.113	4.58782e-233	HBC-4
Gadd45a	2.39678e-237	1.57466	0.879	0.1	4.65023e-233	GBC-2
Mycbp	2.53644e-237	0.551917	0.705	0.457	4.9212e-233	mOSN-1
Mtmr11	3.70194e-237	0.53276	0.204	0.01	7.1825e-233	HBC-1
Adcy3	6.00865e-237	0.509481	0.767	0.474	1.1658e-232	mOSN-1
Bcam	9.47413e-237	1.32818	0.608	0.057	1.83817e-232	HBC-3
Ephx4	1.01634e-236	0.689191	0.523	0.254	1.9719e-232	mOSN-1
Vamp8	1.60374e-236	1.75667	0.857	0.134	3.11158e-232	HBC-3
Ndufa5	2.15365e-236	0.468141	0.849	0.682	4.1785e-232	mOSN-1
Mki67	2.75094e-236	0.805367	0.494	0.053	5.33737e-232	GBC-1
Mis18a	7.12438e-236	0.839308	0.648	0.049	1.38227e-231	GBC-2
Hmgb3	7.64126e-236	1.24502	0.841	0.184	1.48256e-231	GBC-1
Dbn1	7.66793e-236	1.14714	0.667	0.123	1.48773e-231	GBC-3
Neurod1	1.15948e-235	1.50049	0.628	0.063	2.24963e-231	GBC-4
Rab27b	1.52459e-235	0.826721	0.358	0.025	2.95802e-231	HBC-4
Col17a1	1.60754e-235	0.864974	0.396	0.031	3.11895e-231	HBC-4
Trim59	1.64144e-235	0.649898	0.419	0.038	3.18472e-231	GBC-1
Nrep	1.68823e-235	1.33122	0.848	0.125	3.2755e-231	GBC-4
Kif15	2.43538e-235	0.521188	0.358	0.014	4.72513e-231	GBC-2
Dmrta2	5.48282e-235	0.700168	0.514	0.057	1.06378e-230	GBC-1
Cnpy1	8.21415e-235	0.85327	0.464	0.056	1.59371e-230	GBC-3
Tmem107	1.61857e-234	0.612078	0.57	0.318	3.14035e-230	mOSN-1
Gadd45g	4.15612e-234	1.04346	0.488	0.062	8.0637e-230	GBC-3
Cdca2	6.04682e-234	0.274571	0.226	0.009	1.1732e-229	GBC-1
Ndufv2	6.74597e-234	0.58458	0.663	0.43	1.30885e-229	mOSN-1
Ndufa1	1.03602e-233	0.51291	0.782	0.597	2.01009e-229	mOSN-1
Ppic	1.96608e-233	0.418931	0.332	0.023	3.8146e-229	GBC-1
Ptrf	2.45882e-233	0.676386	0.302	0.017	4.77061e-229	HBC-4
BC026585	2.77526e-233	0.998349	0.429	0.046	5.38456e-229	iOSN-1
2700094K13Rik	7.59234e-233	1.20989	0.827	0.176	1.47307e-228	GBC-1
Runx1	1.37845e-232	0.956752	0.492	0.074	2.67448e-228	HBC-1
Cox6b1	2.17542e-232	0.414704	0.914	0.795	4.22074e-228	mOSN-1
Tmem2	2.78945e-232	1.3422	0.693	0.082	5.41209e-228	GBC-4
Dbf4	3.08238e-232	0.723513	0.479	0.027	5.98043e-228	GBC-2
Npnt	3.10121e-231	0.788921	0.283	0.015	6.01697e-227	HBC-4
Klf5	4.38533e-231	0.716969	0.283	0.015	8.50842e-227	HBC-4
Vimp	5.11488e-231	0.539646	0.723	0.484	9.92389e-227	mOSN-1
Nde1	5.63511e-231	0.423217	0.304	0.019	1.09332e-226	GBC-1
Ndufb11	6.40099e-231	0.519264	0.762	0.57	1.24192e-226	mOSN-1
Antxr1	6.45437e-231	0.677646	0.269	0.02	1.25228e-226	HBC-1
Hmmr	7.01729e-231	0.462866	0.296	0.018	1.36149e-226	GBC-1
Shcbp1	3.1657e-230	0.333735	0.251	0.012	6.14209e-226	GBC-1
4631405K08Rik	4.45195e-230	1.46747	0.619	0.057	8.63768e-226	HBC-2
Fstl5	7.71482e-230	0.730436	0.966	0.865	1.49683e-225	mOSN-2
Ect2	1.35713e-229	0.348892	0.282	0.016	2.63311e-225	GBC-1
F3	1.75386e-229	1.62047	0.777	0.09	3.40285e-225	HBC-2
Dpysl3	3.09624e-229	1.41155	0.88	0.192	6.00733e-225	iOSN-3
Vim	4.85452e-229	1.33567	0.733	0.147	9.41874e-225	iOSN-1
Gm684	6.96951e-229	0.362717	0.235	0.011	1.35222e-224	GBC-1
Ccdc33	8.18323e-229	0.626327	0.364	0.129	1.58771e-224	mOSN-1
Tfap4	8.85156e-229	0.391415	0.26	0.014	1.71738e-224	GBC-1
Lhx2	1.35515e-228	1.51573	0.993	0.571	2.62925e-224	GBC-3
Timp3	4.58145e-228	0.971953	0.431	0.058	8.88893e-224	HBC-1
Cyp2f2	5.82936e-228	2.29191	0.972	0.207	1.13101e-223	HBC-3
Stil	6.32044e-228	0.809845	0.552	0.036	1.22629e-223	GBC-2
Rnf144a	9.06689e-228	1.11822	0.546	0.065	1.75916e-223	iOSN-3
Ptprz1	1.35519e-227	0.769414	0.32	0.03	2.62934e-223	HBC-1
Clmn	1.76143e-227	1.40263	0.84	0.128	3.41752e-223	GBC-4
Pdcd4	3.05254e-227	1.37903	0.739	0.133	5.92255e-223	HBC-4
Rrp12	6.48267e-227	0.454745	0.369	0.03	1.25777e-222	GBC-1
1700020I14Rik	9.74461e-227	0.667454	0.699	0.374	1.89065e-222	mOSN-3
Bsg	3.03344e-226	0.456772	0.833	0.655	5.88549e-222	mOSN-1
Adhfe1	3.98053e-226	0.506044	0.358	0.014	7.72302e-222	GBC-2
Cdkn3	5.07024e-226	0.560681	0.339	0.013	9.83729e-222	GBC-2
Ldhb	8.87559e-226	1.81631	1	0.766	1.72204e-221	iOSN-1
Lig1	1.11432e-225	0.66473	0.436	0.043	2.16201e-221	GBC-1
Ppp1r14a	1.31246e-225	0.953127	0.528	0.045	2.54643e-221	GBC-4
Cep152	2.11869e-225	0.904194	0.618	0.046	4.11068e-221	GBC-2
Anxa2	2.29162e-225	0.923485	0.51	0.081	4.4462e-221	HBC-1
Lrrc42	2.34365e-225	1.01251	0.567	0.09	4.54716e-221	GBC-3
Tead2	2.36173e-225	0.730628	0.485	0.028	4.58222e-221	GBC-2
Sfn	3.52935e-225	1.25755	0.535	0.046	6.84764e-221	HBC-3
Trp63	5.32495e-225	1.27521	0.673	0.07	1.03315e-220	HBC-3
Pth2	5.65274e-225	0.685441	0.415	0.168	1.09674e-220	mOSN-1
Nme1	7.79556e-225	1.23488	0.824	0.186	1.51249e-220	GBC-1
Atp8b4	8.10505e-225	1.01696	0.593	0.058	1.57254e-220	GBC-4
Plxna4	1.26409e-224	0.639213	0.469	0.16	2.45259e-220	mOSN-3
G0s2	1.40476e-224	1.42673	0.563	0.049	2.72552e-220	HBC-2
Cd14	1.9985e-224	0.885267	0.309	0.014	3.8775e-220	HBC-3
Abracl	2.79184e-224	0.716764	0.598	0.08	5.41672e-220	GBC-1
Efemp1	3.70606e-224	1.2615	0.562	0.05	7.19051e-220	HBC-3
Sgol2a	8.30481e-224	0.319871	0.246	0.012	1.6113e-219	GBC-1
Kif22	9.01592e-224	0.440609	0.304	0.02	1.74927e-219	GBC-1
Ifitm3	1.12523e-223	2.12063	0.954	0.188	2.18317e-219	HBC-3
Coch	1.46681e-223	0.909803	0.411	0.14	2.8459e-219	mOSN-2
Calb2	2.36038e-222	1.41142	0.817	0.285	4.57961e-218	iOSN-4
Dad1	3.2263e-222	0.53637	0.718	0.51	6.25967e-218	mOSN-1
Fam83d	4.34477e-222	0.337808	0.248	0.006	8.42972e-218	GBC-2
Fam92b	1.18962e-221	0.57878	0.58	0.32	2.30811e-217	mOSN-1
Ltf	1.65543e-221	1.00653	0.464	0.159	3.21186e-217	mOSN-3
Hes1	1.90803e-221	1.65409	0.7	0.085	3.70197e-217	HBC-3
Spef1	2.28622e-221	0.587076	0.587	0.331	4.43572e-217	mOSN-1
Smc4	2.55113e-221	1.05968	0.628	0.096	4.94971e-217	GBC-1
Tuba1b	4.38319e-221	1.44535	0.858	0.213	8.50426e-217	GBC-1
Id3	4.59265e-221	1.0755	0.564	0.077	8.91065e-217	GBC-1
Dnaja1	5.79316e-221	0.478078	0.845	0.665	1.12399e-216	mOSN-1
H1fx	7.73662e-221	0.86013	0.581	0.08	1.50106e-216	GBC-1
Rrs1	1.09667e-220	0.826191	0.623	0.09	2.12776e-216	GBC-1
Tex15	1.90566e-220	1.73	0.758	0.102	3.69737e-216	GBC-4
Pax6	1.99619e-220	0.635296	0.486	0.054	3.87301e-216	GBC-1
mt-Nd3	2.55105e-220	0.728814	0.798	0.631	4.94955e-216	mOSN-2
Scn9a	2.89214e-220	0.604081	0.835	0.546	5.61133e-216	mOSN-3
Bub1b	4.48327e-220	0.588122	0.358	0.015	8.69843e-216	GBC-2
Tsc22d3	5.08413e-220	1.81016	0.728	0.097	9.86424e-216	HBC-3
Capg	1.04361e-219	1.02783	0.442	0.031	2.02481e-215	HBC-3
Tesc	1.63834e-219	0.465217	0.793	0.54	3.17871e-215	mOSN-1
Uchl3	2.28804e-219	0.700623	0.623	0.088	4.43925e-215	GBC-1
Dkkl1	2.75171e-219	0.55314	0.237	0.023	5.33887e-215	iOSN-2
Ces1d	3.2603e-219	1.28301	0.745	0.13	6.32563e-215	HBC-4
Pltp	4.01674e-219	1.24691	0.503	0.038	7.79328e-215	HBC-2
S100a16	4.05417e-219	0.90087	0.465	0.047	7.86591e-215	HBC-4
Dctpp1	4.41742e-219	0.904204	0.679	0.109	8.57068e-215	GBC-1
Wdr66	4.97291e-219	1.08587	0.712	0.148	9.64843e-215	GBC-3
Hes6	6.23243e-219	1.19759	0.838	0.209	1.20922e-214	GBC-3
Meis2	7.39155e-219	0.85724	0.418	0.056	1.43411e-214	HBC-1
C330027C09Rik	2.72526e-218	0.521647	0.358	0.015	5.28755e-214	GBC-2
Dcdc2a	3.27955e-218	0.663525	0.797	0.467	6.36298e-214	mOSN-3
Ssbp2	4.304e-218	1.63592	0.956	0.422	8.35062e-214	iOSN-1
Mrpl42	6.5956e-218	0.587288	0.597	0.362	1.27968e-213	mOSN-1
Plk4	6.86351e-218	1.5124	0.897	0.113	1.33166e-213	GBC-2
S100a6	1.07048e-217	2.64169	0.977	0.235	2.07694e-213	HBC-3
Faim	1.29671e-217	0.507274	0.747	0.506	2.51588e-213	mOSN-1
Nudt5	2.23721e-217	0.626144	0.536	0.066	4.34063e-213	GBC-1
Nt5dc2	2.62792e-217	0.519736	0.372	0.032	5.09868e-213	GBC-1
Tinagl1	3.96243e-217	0.627127	0.253	0.019	7.68791e-213	HBC-1
Wls	4.39114e-217	1.20887	0.73	0.124	8.51969e-213	HBC-4
Gm10631	8.42121e-217	0.70808	0.351	0.02	1.63388e-212	GBC-4
Pfdn2	6.61348e-216	0.505607	0.732	0.53	1.28315e-211	mOSN-1
Shisa4	1.35108e-215	0.709538	0.34	0.031	2.62136e-211	GBC-3
Tcf7l2	1.56866e-215	0.694533	0.308	0.03	3.04351e-211	HBC-1
Kif15	1.8011e-215	0.317356	0.237	0.012	3.49449e-211	GBC-1
Hba-a2	4.52717e-215	0.916278	0.975	0.474	8.78362e-211	mOSN-4
Nr3c1	4.83898e-215	0.896198	0.482	0.076	9.38859e-211	HBC-1
Aig1	5.8533e-215	0.594381	0.593	0.353	1.13566e-210	mOSN-1
Rcor1	6.24546e-215	1.325	0.699	0.148	1.21174e-210	iOSN-1
Tubb2b	6.89796e-215	1.28891	0.957	0.332	1.33834e-210	GBC-3
Avpi1	1.95709e-214	0.969077	0.41	0.027	3.79715e-210	HBC-3
Mcm5	2.32338e-214	0.415016	0.296	0.02	4.50782e-210	GBC-1
Nnat	3.65756e-214	1.08986	0.288	0.022	7.0964e-210	GBC-3
Ece1	8.33924e-214	1.25152	0.775	0.232	1.61798e-209	HBC-1
Atp5h	2.41342e-213	0.418526	0.901	0.8	4.68252e-209	mOSN-1
Bcam	2.78324e-213	0.995672	0.497	0.056	5.40004e-209	HBC-4
Col16a1	5.87126e-213	0.887078	0.424	0.023	1.13914e-208	GBC-2
Oit1	7.8613e-213	0.583155	0.236	0.011	1.52525e-208	HBC-4
Tuba1a	7.87336e-213	0.216529	0.992	0.869	1.52759e-208	mOSN-1
Dbp	1.29902e-212	1.23749	0.576	0.057	2.52036e-208	HBC-3
Cdyl2	1.65603e-212	0.864619	0.474	0.063	3.21302e-208	GBC-3
Tmem59	3.03816e-212	0.486385	0.799	0.634	5.89464e-208	mOSN-1
1700001L19Rik	3.1089e-212	0.602918	0.387	0.156	6.03188e-208	mOSN-1
Hif1a	3.84065e-212	1.06063	0.647	0.149	7.45163e-208	HBC-1
Cnpy1	4.93179e-212	0.920384	0.584	0.06	9.56866e-208	GBC-4
Mad2l1	5.58841e-212	0.637335	0.485	0.03	1.08426e-207	GBC-2
Gm14964	6.74779e-212	0.60938	0.238	0.024	1.30921e-207	iOSN-2
Hist1h1b	7.67075e-212	1.00373	0.43	0.024	1.48828e-207	GBC-2
Cenpw	1.0309e-211	0.746921	0.558	0.04	2.00016e-207	GBC-2
Cdkn2c	1.24738e-211	0.44927	0.363	0.031	2.42016e-207	GBC-1
Col7a1	1.80811e-211	0.556622	0.227	0.015	3.50809e-207	HBC-1
Nuak1	1.84154e-211	0.714921	0.362	0.036	3.57296e-207	GBC-3
Cenph	2.51302e-211	0.377453	0.31	0.022	4.87576e-207	GBC-1
Ndufb10	2.78867e-211	0.500887	0.749	0.564	5.41058e-207	mOSN-1
Pid1	3.99853e-211	0.542291	0.22	0.014	7.75794e-207	HBC-1
Ric8b	5.86144e-211	0.619418	0.738	0.4	1.13724e-206	mOSN-3
Tubb3	6.93923e-211	1.42475	0.99	0.634	1.34635e-206	GBC-3
Fxyd6	8.00536e-211	0.72772	0.307	0.043	1.5532e-206	iOSN-2
Impdh1	2.78202e-210	0.556438	0.604	0.353	5.39768e-206	mOSN-1
Cnga2	7.37108e-210	0.473384	0.756	0.48	1.43014e-205	mOSN-1
Sox2	7.54688e-210	0.906936	0.457	0.07	1.46424e-205	HBC-1
Fbxo36	9.65741e-210	0.598766	0.371	0.144	1.87373e-205	mOSN-1
Tubb2b	1.02878e-209	1.3716	0.959	0.333	1.99603e-205	iOSN-1
Epb41	1.07585e-209	1.21309	0.801	0.119	2.08736e-205	GBC-4
G0s2	1.90398e-209	0.871423	0.365	0.044	3.6941e-205	HBC-1
Apoe	3.16793e-209	1.41425	0.965	0.541	6.14642e-205	HBC-1
Foxo1	4.13901e-209	0.86394	0.431	0.063	8.0305e-205	HBC-1
Dhrs4	4.31e-209	0.562518	0.455	0.05	8.36226e-205	GBC-1
Sult5a1	4.82317e-209	0.842034	0.259	0.009	9.35791e-205	HBC-2
Esco2	5.80983e-209	0.316116	0.235	0.012	1.12722e-204	GBC-1
Anxa3	1.12907e-208	0.722036	0.352	0.027	2.19062e-204	HBC-4
Impdh2	1.68144e-208	1.4863	0.909	0.125	3.26232e-204	GBC-2
S100a11	2.02843e-208	1.93435	0.935	0.204	3.93557e-204	HBC-3
Rcor2	3.24949e-208	0.737122	0.485	0.031	6.30466e-204	GBC-2
Cox7b	3.60496e-208	0.468208	0.807	0.638	6.99435e-204	mOSN-1
Spag5	9.31328e-208	0.407896	0.273	0.009	1.80696e-203	GBC-2
Tk1	1.27243e-207	0.400181	0.265	0.016	2.46877e-203	GBC-1
Eml2	2.57894e-207	0.552189	0.6	0.341	5.00366e-203	mOSN-1
Fam129a	3.14052e-207	0.655237	0.284	0.026	6.09323e-203	HBC-1
Hnrnpa1	3.16318e-207	1.27729	0.936	0.376	6.1372e-203	GBC-3
Fam81b	4.95431e-207	0.601648	0.385	0.155	9.61235e-203	mOSN-1
Tmem178b	3.67874e-206	0.573411	0.401	0.124	7.13749e-202	mOSN-3
Sdc4	3.74567e-206	1.13024	0.638	0.099	7.26734e-202	HBC-4
Cdca5	4.41386e-206	0.397343	0.273	0.009	8.56376e-202	GBC-2
Upk1b	1.01365e-205	0.922145	0.359	0.021	1.96669e-201	HBC-3
Grasp	2.49628e-205	0.89021	0.612	0.05	4.84328e-201	GBC-2
Aurkb	6.0448e-205	0.347858	0.249	0.014	1.17281e-200	GBC-1
Dsn1	6.23124e-205	0.291802	0.218	0.005	1.20899e-200	GBC-2
Nyap2	7.03199e-205	0.558219	0.364	0.104	1.36435e-200	mOSN-3
Atpif1	9.16984e-205	0.342102	0.962	0.876	1.77913e-200	mOSN-1
Nrxn1	1.08942e-204	0.614821	0.814	0.536	2.1137e-200	mOSN-3
Ndufab1	1.44007e-204	0.510005	0.704	0.499	2.79402e-200	mOSN-1
Tmsb10	1.68145e-204	1.55901	1	0.774	3.26236e-200	iOSN-1
Ifitm3	2.00856e-204	2.30727	0.939	0.19	3.89701e-200	HBC-2
Hspa1b	2.73573e-204	0.608836	0.264	0.015	5.30786e-200	HBC-4
Oit1	3.15568e-204	0.756847	0.276	0.012	6.12264e-200	HBC-3
S100a14	4.04852e-204	0.685729	0.302	0.02	7.85494e-200	HBC-4
Gm3550	4.57702e-204	0.431643	0.279	0.009	8.88034e-200	GBC-2
Uqcr10	5.9561e-204	0.443836	0.847	0.714	1.1556e-199	mOSN-1
Micalcl	1.05031e-203	0.553254	0.441	0.048	2.03781e-199	GBC-1
Cenpw	1.1842e-203	0.518514	0.385	0.037	2.29758e-199	GBC-1
Ssfa2	2.98741e-203	0.68492	0.31	0.032	5.79618e-199	HBC-1
Nedd4	4.46902e-203	1.15403	0.765	0.234	8.67079e-199	HBC-1
Tubb3	5.64283e-203	0.912265	0.958	0.625	1.09482e-198	iOSN-2
Mss51	7.91628e-203	0.735281	0.385	0.026	1.53592e-198	GBC-4
Perp	1.04031e-202	1.44808	0.67	0.077	2.01841e-198	HBC-2
Pdpn	4.91845e-202	1.21125	0.479	0.041	9.54278e-198	HBC-3
Fmo1	7.28308e-202	0.762762	0.261	0.015	1.41306e-197	HBC-4
Ngp	8.57036e-202	0.900091	0.87	0.354	1.66282e-197	mOSN-4
Cd1d1	8.6763e-202	0.619749	0.312	0.028	1.68338e-197	GBC-3
Utrn	8.801e-202	0.583993	0.231	0.017	1.70757e-197	HBC-1
Rad54l	1.61707e-201	0.399823	0.279	0.01	3.13743e-197	GBC-2
Tmem57	4.715e-201	1.50666	0.896	0.18	9.14804e-197	GBC-4
Incenp	6.72629e-201	0.646965	0.479	0.031	1.30503e-196	GBC-2
Dmbt1	1.09215e-200	1.09845	0.21	0.035	2.119e-196	mOSN-3
Epha5	1.20176e-200	0.666719	0.624	0.296	2.33166e-196	mOSN-3
Aurka	1.6583e-200	0.443673	0.307	0.023	3.21743e-196	GBC-1
Ftl1	2.152e-200	1.20099	1	0.843	4.1753e-196	GBC-3
Syce2	4.01368e-200	0.643424	0.464	0.054	7.78735e-196	GBC-1
Bcam	4.28586e-200	1.25652	0.589	0.058	8.31542e-196	HBC-2
Igsf9	5.38659e-200	0.543087	0.433	0.047	1.04511e-195	GBC-1
Sult1c1	9.55903e-200	0.854495	0.305	0.08	1.85464e-195	mOSN-2
Myof	1.03155e-199	0.603738	0.255	0.014	2.00142e-195	HBC-4
Lgals1	1.36305e-199	0.877403	0.497	0.064	2.6446e-195	GBC-1
Aqp4	1.47921e-199	1.12365	0.607	0.091	2.86996e-195	HBC-4
Dapp1	1.69795e-199	0.362276	0.291	0.021	3.29437e-195	GBC-1
Mgat3	3.41112e-199	0.64681	0.3	0.03	6.61826e-195	HBC-1
Hba-a1	1.06884e-198	0.765968	0.993	0.602	2.07376e-194	mOSN-4
mt-Nd4l	1.40186e-198	0.401408	0.915	0.59	2.71988e-194	mOSN-3
Tubb5	1.44868e-198	1.53171	0.99	0.535	2.81074e-194	iOSN-1
Krt19	2.60054e-198	1.05898	0.472	0.053	5.04556e-194	HBC-4
2900026A02Rik	2.78907e-198	0.634974	0.288	0.028	5.41135e-194	HBC-1
Tubb5	3.11004e-198	1.34822	0.988	0.534	6.0341e-194	GBC-3
Nhlh1	3.98161e-198	1.03198	0.658	0.081	7.72512e-194	GBC-4
Rprm	4.67341e-198	1.53583	0.482	0.124	9.06735e-194	iOSN-2
Ndufb3	5.57401e-198	0.483969	0.764	0.594	1.08147e-193	mOSN-1
Cdkn3	6.76045e-198	0.33799	0.221	0.011	1.31166e-193	GBC-1
Ptma	7.01157e-198	1.322	1	0.996	1.36039e-193	iOSN-1
Atp6v1g1	1.06145e-197	0.390949	0.888	0.721	2.05942e-193	mOSN-1
Pdpn	1.38547e-197	0.790303	0.406	0.039	2.68808e-193	HBC-4
Sdc4	1.516e-197	1.4968	0.719	0.102	2.94135e-193	HBC-3
Slc4a4	1.77953e-197	0.582462	0.475	0.173	3.45264e-193	mOSN-3
Plk4	2.48115e-197	1.23503	0.758	0.111	4.81393e-193	GBC-4
Notch1	3.11825e-197	0.689587	0.31	0.033	6.05003e-193	HBC-1
Ube2t	3.4013e-197	0.39754	0.316	0.025	6.5992e-193	GBC-1
Phgdh	4.3399e-197	0.460744	0.341	0.029	8.42028e-193	GBC-1
H3f3a	4.684e-197	1.00608	0.995	0.918	9.0879e-193	GBC-3
Krt14	7.465e-197	1.21925	0.566	0.077	1.44836e-192	HBC-4
Spa17	2.16577e-196	0.577758	0.542	0.307	4.20203e-192	mOSN-1
Slc24a2	2.67885e-196	0.614856	0.567	0.247	5.1975e-192	mOSN-3
Pim3	3.31643e-196	1.35178	0.702	0.163	6.43454e-192	iOSN-1
Ncam1	4.28988e-196	0.467361	0.925	0.692	8.32323e-192	mOSN-3
Lrrc10b	4.3773e-196	0.562682	0.391	0.123	8.49283e-192	mOSN-3
Pde4a	5.05277e-196	0.609872	0.74	0.42	9.80339e-192	mOSN-3
Sntb2	6.20773e-196	0.558983	0.22	0.016	1.20442e-191	HBC-1
Hbb-bt	1.14319e-195	0.406127	0.774	0.421	2.21801e-191	mOSN-2
Runx1	2.2232e-195	1.02364	0.563	0.079	4.31346e-191	HBC-4
Ccnd2	2.74025e-195	1.36118	0.608	0.068	5.31664e-191	HBC-3
Aplp2	3.25935e-195	0.602917	0.923	0.821	6.32379e-191	mOSN-2
Bcl2l1	3.45317e-195	1.16739	0.757	0.201	6.69983e-191	GBC-3
Hnrnpa1	4.70876e-195	1.32993	0.972	0.378	9.13593e-191	GBC-1
Sox11	4.9805e-195	1.22313	0.977	0.354	9.66316e-191	iOSN-1
Msx1	1.03627e-194	0.522172	0.297	0.011	2.01057e-190	GBC-2
Npm1	1.1909e-194	1.59213	0.972	0.546	2.31059e-190	GBC-1
Higd2a	2.93524e-194	0.51981	0.672	0.472	5.69495e-190	mOSN-1
Madd	5.47081e-194	0.593871	0.557	0.241	1.06145e-189	mOSN-3
Prr5l	8.23043e-194	0.650359	0.245	0.014	1.59687e-189	HBC-4
Pla2g7	1.29701e-193	0.562723	0.208	0.014	2.51646e-189	HBC-1
Sgpl1	2.46894e-193	0.567979	0.768	0.451	4.79024e-189	mOSN-3
Tspan3	3.32159e-193	0.493257	0.737	0.547	6.44455e-189	mOSN-1
Gnb2	5.46838e-193	0.913224	0.76	0.149	1.06097e-188	GBC-1
Sult1e1	6.35678e-193	1.96686	0.604	0.067	1.23334e-188	HBC-2
Rnf144a	6.53893e-193	0.691439	0.346	0.059	1.26868e-188	iOSN-2
Hes6	6.91024e-193	1.29046	0.789	0.212	1.34073e-188	iOSN-1
Kif2c	9.56052e-193	0.268801	0.201	0.009	1.85493e-188	GBC-1
Cldn3	9.77249e-193	0.944554	0.789	0.356	1.89606e-188	iOSN-2
Ddah2	2.31898e-192	1.31168	0.905	0.171	4.49928e-188	GBC-4
Cenpp	3.65509e-192	0.40086	0.303	0.012	7.09161e-188	GBC-2
Gm6878	3.99705e-192	0.615311	0.325	0.118	7.75508e-188	mOSN-1
Mad2l1	5.61584e-192	0.435981	0.324	0.027	1.08958e-187	GBC-1
Sult2b1	7.04557e-192	0.418961	0.279	0.02	1.36698e-187	GBC-1
Hspb1	9.79493e-192	0.829445	0.471	0.078	1.90041e-187	HBC-1
Lgals3	1.48875e-191	1.45294	0.594	0.071	2.88848e-187	HBC-3
Crlf1	1.81732e-191	0.724699	0.369	0.048	3.52596e-187	HBC-1
Ada	2.50369e-191	0.545373	0.245	0.018	4.85766e-187	GBC-3
Crim1	3.18801e-191	0.979797	0.522	0.068	6.18538e-187	HBC-4
Strbp	4.18467e-191	0.591143	0.743	0.452	8.11911e-187	mOSN-3
Dtymk	4.56836e-191	0.75995	0.684	0.119	8.86352e-187	GBC-1
Ech1	4.76831e-191	0.578014	0.469	0.237	9.25147e-187	mOSN-1
Six3	7.87011e-191	0.954816	0.481	0.059	1.52696e-186	HBC-4
Hlf	1.00037e-190	0.836858	0.409	0.041	1.94092e-186	HBC-4
Luzp1	1.23373e-190	0.641885	0.28	0.028	2.39369e-186	HBC-1
Vegfa	1.29794e-190	0.692361	0.284	0.029	2.51827e-186	HBC-1
Ccnd2	2.43039e-190	1.41877	0.624	0.069	4.71545e-186	HBC-2
Myo10	2.6295e-190	0.622829	0.249	0.022	5.10176e-186	HBC-1
Ank3	2.8826e-190	0.58195	0.709	0.403	5.59282e-186	mOSN-3
Cfap36	3.10665e-190	0.522647	0.614	0.39	6.02752e-186	mOSN-1
5730403I07Rik	3.50687e-190	0.582744	0.597	0.372	6.80403e-186	mOSN-1
Eya2	5.45296e-190	0.953175	0.567	0.063	1.05798e-185	GBC-4
Ccdc153	1.31358e-189	0.532569	0.218	0.016	2.5486e-185	HBC-1
Rasl11a	2.07271e-189	0.721546	0.288	0.096	4.02147e-185	mOSN-1
Ccsap	2.34843e-189	0.742453	0.45	0.039	4.55642e-185	GBC-4
Krt19	3.31283e-189	0.759722	0.378	0.051	6.42755e-185	HBC-1
Ptma	3.57677e-189	0.344044	0.999	0.996	6.93964e-185	iOSN-2
Sox11	3.71773e-189	1.51537	0.987	0.357	7.21314e-185	iOSN-3
Rbms3	4.3211e-189	0.875626	0.415	0.044	8.38379e-185	HBC-4
Ppdpf	4.78492e-189	0.516289	0.693	0.497	9.2837e-185	mOSN-1
Prdx6	5.43055e-189	2.67333	0.991	0.31	1.05363e-184	HBC-3
Dnase2a	7.7123e-189	0.839268	0.618	0.055	1.49634e-184	GBC-2
Dlx6	8.96897e-189	1.05246	0.38	0.045	1.74016e-184	iOSN-1
Ifitm2	1.53865e-188	1.09855	0.885	0.234	2.98528e-184	GBC-1
Dctn3	3.42871e-188	0.470611	0.707	0.491	6.65237e-184	mOSN-1
Serpinb5	3.81514e-188	0.582295	0.217	0.008	7.40213e-184	HBC-3
H2afx	4.77132e-188	1.48115	0.897	0.133	9.25732e-184	GBC-2
Esd	4.88706e-188	0.745074	0.679	0.119	9.48188e-184	GBC-1
Gstm2	1.57633e-187	1.75729	0.787	0.124	3.0584e-183	HBC-2
Rdx	1.92071e-187	0.742597	0.623	0.103	3.72655e-183	GBC-1
Tmed2	3.03098e-187	0.4892	0.715	0.521	5.8807e-183	mOSN-1
Yap1	3.44989e-187	0.549631	0.241	0.02	6.69348e-183	HBC-1
Tmbim6	5.46325e-187	0.486596	0.872	0.715	1.05998e-182	mOSN-1
Mcm6	6.56797e-187	0.598344	0.355	0.034	1.27432e-182	GBC-1
Ephb1	9.72463e-187	0.530879	0.216	0.016	1.88677e-182	HBC-1
Cfap69	1.89108e-186	0.589847	0.63	0.308	3.66908e-182	mOSN-3
Rgs2	2.12033e-186	0.998315	0.41	0.055	4.11386e-182	GBC-3
Mdh2	2.3015e-186	0.485019	0.698	0.493	4.46537e-182	mOSN-1
Ahi1	2.83034e-186	0.592471	0.593	0.283	5.49142e-182	mOSN-3
Tspan7	7.28043e-186	0.450561	0.711	0.444	1.41255e-181	mOSN-1
Kif20a	8.91106e-186	0.28631	0.212	0.011	1.72892e-181	GBC-1
Sox4	1.74732e-185	1.01587	0.707	0.137	3.39014e-181	GBC-1
Gm13589	2.74191e-185	0.601244	0.404	0.183	5.31984e-181	mOSN-1
Emp1	4.16838e-185	1.13813	0.214	0.011	8.0875e-181	HBC-4
Cep152	4.41962e-185	0.852762	0.481	0.046	8.57495e-181	GBC-4
Cbr2	5.27816e-185	1.61606	0.987	0.405	1.02407e-180	HBC-4
Prmt8	2.21988e-184	0.549049	0.364	0.019	4.30701e-180	GBC-2
Zfp386	2.86784e-184	1.04836	0.66	0.149	5.56417e-180	GBC-3
Lypd1	2.92635e-184	0.820147	0.272	0.022	5.6777e-180	iOSN-1
Rgs12	3.39228e-184	0.816851	0.41	0.064	6.58171e-180	HBC-1
Neil3	5.1824e-184	0.560198	0.333	0.016	1.00549e-179	GBC-2
Sub1	5.68104e-184	0.286206	0.965	0.868	1.10224e-179	mOSN-1
Scgb1c1	7.16467e-184	1.34949	0.99	0.708	1.39009e-179	HBC-1
Aplp2	1.81647e-183	0.40864	0.959	0.81	3.52431e-179	mOSN-3
Qdpr	2.69051e-183	1.08003	0.783	0.209	5.22013e-179	GBC-3
Gjc1	3.17196e-183	0.296511	0.204	0.01	6.15423e-179	GBC-1
Zfp503	4.12032e-183	0.4485	0.385	0.041	7.99425e-179	GBC-1
Trib3	5.22922e-183	0.728615	0.29	0.044	1.01457e-178	iOSN-2
Otx2	6.53582e-183	0.80737	0.402	0.062	1.26808e-178	HBC-1
Dpysl5	7.63896e-183	1.32252	0.818	0.151	1.48211e-178	GBC-4
Tns4	9.79414e-183	0.661197	0.274	0.019	1.90026e-178	HBC-4
Foxg1	1.40572e-182	0.52509	0.419	0.048	2.72738e-178	GBC-1
Pmf1	1.80591e-182	0.425577	0.358	0.035	3.50383e-178	GBC-1
Mt3	2.21508e-182	0.586021	0.394	0.176	4.2977e-178	mOSN-1
Pebp1	2.80316e-182	1.08068	0.79	0.215	5.4387e-178	GBC-3
Ezh2	3.64041e-182	0.924479	0.721	0.144	7.06312e-178	GBC-1
Vim	3.96197e-182	1.17179	0.741	0.15	7.68702e-178	iOSN-3
Elavl4	5.15585e-182	2.01834	0.97	0.275	1.00034e-177	GBC-4
Myb	7.6155e-182	0.448573	0.277	0.021	1.47756e-177	GBC-1
Crabp1	9.67237e-182	1.54569	0.918	0.195	1.87663e-177	GBC-4
Rad51	1.24618e-181	0.536765	0.333	0.016	2.41784e-177	GBC-2
Macrod1	1.61003e-181	0.586218	0.493	0.266	3.12378e-177	mOSN-1
Baz1a	2.12206e-181	1.27559	0.855	0.115	4.11722e-177	GBC-2
Hist3h2ba	2.99665e-181	1.19627	0.86	0.285	5.81411e-177	GBC-3
Umodl1	3.14229e-181	0.761535	0.771	0.549	6.09667e-177	mOSN-2
H1fx	3.20004e-181	1.07047	0.745	0.085	6.20873e-177	GBC-2
Mad2l2	4.0419e-181	0.793965	0.431	0.101	7.8421e-177	iOSN-2
Rrm1	4.25631e-181	0.821974	0.6	0.054	8.25808e-177	GBC-2
Prpf4b	5.60067e-181	0.590656	0.63	0.326	1.08664e-176	mOSN-3
Rplp0	6.3281e-181	1.44098	0.992	0.678	1.22778e-176	GBC-1
Cox7a2	7.15174e-181	0.383802	0.894	0.784	1.38758e-176	mOSN-1
Maml3	1.00768e-180	0.691242	0.437	0.038	1.9551e-176	GBC-4
Map1b	1.08833e-180	0.41977	0.949	0.829	2.11157e-176	mOSN-3
Camp	1.31023e-180	0.742089	0.923	0.402	2.5421e-176	mOSN-4
Gdf5	1.99858e-180	0.734503	0.223	0.008	3.87764e-176	HBC-2
Camk2n1	2.0192e-180	1.01336	0.688	0.157	3.91765e-176	GBC-3
Fmn2	2.98123e-180	0.591729	0.529	0.231	5.78417e-176	mOSN-3
Srcin1	3.06815e-180	0.545244	0.567	0.254	5.95283e-176	mOSN-3
Apex1	3.93725e-180	0.733845	0.612	0.103	7.63905e-176	GBC-1
Itgb4	5.72513e-180	0.712697	0.336	0.029	1.11079e-175	HBC-4
Ncaph	8.20737e-180	0.376495	0.261	0.009	1.59239e-175	GBC-2
Prex1	9.33543e-180	0.644087	0.343	0.039	1.81126e-175	GBC-3
Amot	1.02947e-179	0.330279	0.229	0.014	1.99738e-175	GBC-1
Stmn1	1.16993e-179	1.33393	1	0.591	2.26989e-175	iOSN-1
Nr1d1	2.85241e-179	0.579185	0.237	0.02	5.53424e-175	HBC-1
Prkx	3.69403e-179	0.566575	0.498	0.208	7.16716e-175	mOSN-3
Mlf1	4.66803e-179	0.474447	0.673	0.439	9.05691e-175	mOSN-1
Rnf150	7.45683e-179	0.543901	0.376	0.123	1.44677e-174	mOSN-3
Lypd2	9.15161e-179	1.50818	0.724	0.112	1.7756e-174	HBC-3
Slc29a1	1.5269e-178	0.996703	0.386	0.027	2.96249e-174	HBC-2
Ltbp4	1.77436e-178	0.65198	0.304	0.035	3.44261e-174	HBC-1
Dlk2	2.41161e-178	0.868833	0.318	0.019	4.67901e-174	HBC-3
Fat1	2.67563e-178	0.898701	0.476	0.09	5.19125e-174	HBC-1
Cyp2f2	7.41676e-178	0.751985	0.733	0.199	1.439e-173	HBC-1
Camk2n1	7.95776e-178	1.21402	0.861	0.162	1.54397e-173	GBC-4
Kcnq3	8.58562e-178	0.506399	0.255	0.013	1.66578e-173	GBC-4
Dnph1	1.04784e-177	0.380726	0.307	0.026	2.03303e-173	GBC-1
Hspb8	1.0562e-177	0.615764	0.305	0.024	2.04924e-173	HBC-4
Kpna2	1.37454e-177	1.275	0.582	0.054	2.66689e-173	GBC-2
Ddx5	2.00307e-177	0.36492	0.977	0.927	3.88635e-173	mOSN-3
Tshz2	2.80052e-177	0.423726	0.965	0.884	5.43357e-173	mOSN-3
Foxg1	3.1483e-177	0.874249	0.576	0.052	6.10833e-173	GBC-2
Pde7a	6.63062e-177	0.879931	0.396	0.043	1.28647e-172	HBC-4
Dlk2	7.384e-177	0.935884	0.33	0.019	1.43264e-172	HBC-2
Lamb3	1.28344e-176	1.17713	0.477	0.043	2.49012e-172	HBC-2
Oat	1.65189e-176	1.25454	0.59	0.073	3.205e-172	HBC-3
Gm8730	1.85701e-176	1.1369	0.829	0.258	3.60298e-172	GBC-3
Anxa2	3.81522e-176	1.32032	0.645	0.088	7.4023e-172	HBC-3
Stmn1	4.52115e-176	1.2186	0.993	0.591	8.77193e-172	GBC-3
Mmp16	9.97796e-176	0.518534	0.323	0.094	1.93592e-171	mOSN-3
Tns4	1.02917e-175	0.55644	0.216	0.017	1.9968e-171	HBC-1
Cenph	1.09978e-175	0.590851	0.406	0.025	2.13378e-171	GBC-2
Mif	1.4014e-175	1.25928	0.869	0.276	2.719e-171	GBC-1
Marcks	1.65032e-175	1.35876	0.94	0.338	3.20195e-171	iOSN-3
Fam110a	2.7816e-175	0.597482	0.295	0.029	5.39686e-171	GBC-3
Sox11	3.33379e-175	2.23831	0.991	0.361	6.46821e-171	GBC-4
Gas6	3.56506e-175	0.83915	0.427	0.073	6.91693e-171	HBC-1
S100a10	4.33973e-175	1.17346	0.59	0.072	8.41995e-171	HBC-3
Ltbp4	6.31552e-175	1.02173	0.438	0.039	1.22534e-170	HBC-3
Ncapd2	8.45768e-175	0.771332	0.57	0.05	1.64096e-170	GBC-2
Ptges	1.01611e-174	0.540316	0.242	0.015	1.97146e-170	HBC-4
Atp1b3	1.08137e-174	1.14029	0.607	0.107	2.09807e-170	HBC-4
Elmo1	1.10249e-174	0.727777	0.433	0.039	2.13904e-170	GBC-4
Prmt1	1.21763e-174	1.09293	0.768	0.189	2.36245e-170	GBC-1
Twf1	2.00811e-174	1.19534	0.826	0.279	3.89613e-170	GBC-3
Amotl2	2.19219e-174	0.657777	0.467	0.033	4.25328e-170	GBC-2
Dynlrb1	2.33193e-174	0.428222	0.787	0.613	4.52442e-170	mOSN-1
Micalcl	3.3292e-174	0.725295	0.374	0.048	6.45932e-170	GBC-3
Galm	3.85669e-174	0.706279	0.545	0.083	7.48276e-170	GBC-1
Tuba1c	4.11256e-174	0.835776	0.479	0.036	7.9792e-170	GBC-2
Dmrt3	4.16038e-174	0.340171	0.263	0.019	8.07198e-170	GBC-1
Igsf8	4.29145e-174	0.432557	0.731	0.507	8.32627e-170	mOSN-1
Mex3a	4.9731e-174	0.8002	0.529	0.093	9.6488e-170	GBC-3
Fbxo5	5.25824e-174	0.340114	0.268	0.02	1.0202e-169	GBC-1
Basp1	5.67018e-174	1.30208	0.798	0.195	1.10013e-169	iOSN-3
Oat	6.21941e-174	0.797967	0.414	0.068	1.20669e-169	HBC-1
Eif5a	7.36056e-174	0.813817	0.905	0.55	1.4281e-169	iOSN-2
H2afz	8.24948e-174	1.80969	0.997	0.815	1.60056e-169	GBC-1
Rps11	8.39683e-174	1.10097	0.997	0.869	1.62915e-169	GBC-1
Gadd45gip1	9.00324e-174	1.10746	0.8	0.245	1.74681e-169	GBC-3
1500011B03Rik	9.71497e-174	0.487266	0.622	0.405	1.8849e-169	mOSN-1
E2f1	1.07027e-173	0.800708	0.497	0.039	2.07654e-169	GBC-2
Tyms	1.10218e-173	0.839584	0.479	0.036	2.13845e-169	GBC-2
Oaz1	1.20159e-173	0.308835	0.964	0.909	2.33133e-169	mOSN-1
Serf1	1.2926e-173	0.881064	0.618	0.215	2.5079e-169	iOSN-2
Hspb1	1.39945e-173	1.50922	0.65	0.085	2.7152e-169	HBC-2
Basp1	1.82454e-173	1.05266	0.675	0.191	3.53998e-169	HBC-1
Ackr3	3.96796e-173	1.03696	0.355	0.024	7.69863e-169	HBC-2
Gpx2	4.57722e-173	0.675744	0.3	0.03	8.88073e-169	GBC-3
Mdm1	5.0919e-173	1.2311	0.8	0.109	9.87931e-169	GBC-2
Rps18	9.54976e-173	1.13057	1	0.901	1.85284e-168	GBC-1
Gclm	9.80623e-173	1.97683	0.975	0.269	1.90261e-168	HBC-2
Gar1	1.2494e-172	0.699712	0.584	0.097	2.42409e-168	GBC-1
Tmsb10	3.60037e-172	1.15453	0.998	0.773	6.98543e-168	GBC-3
Aqp5	3.64404e-172	1.43039	0.636	0.089	7.07017e-168	HBC-3
Rgs2	4.00993e-172	0.965901	0.524	0.058	7.78006e-168	GBC-4
Macf1	6.71831e-172	0.574556	0.616	0.314	1.30349e-167	mOSN-3
2200002D01Rik	1.02585e-171	0.771167	0.281	0.015	1.99035e-167	HBC-3
Hes1	1.15009e-171	1.55729	0.65	0.087	2.2314e-167	HBC-2
Ywhaz	1.36799e-171	0.558966	0.738	0.468	2.65418e-167	mOSN-3
Acp2	1.98401e-171	0.550196	0.421	0.155	3.84938e-167	mOSN-3
Fabp5	2.05254e-171	1.03818	0.662	0.153	3.98233e-167	GBC-3
Retnlg	2.22071e-171	0.541924	0.544	0.252	4.30862e-167	mOSN-3
Ndufa12	2.31423e-171	0.45681	0.723	0.534	4.49007e-167	mOSN-1
Bmpr1b	2.38551e-171	0.520599	0.345	0.018	4.62837e-167	GBC-2
Wbp5	2.64725e-171	1.22381	0.953	0.447	5.1362e-167	GBC-1
Mrps33	3.2013e-171	0.454885	0.734	0.557	6.21116e-167	mOSN-1
H2afv	4.66331e-171	1.26315	0.939	0.397	9.04775e-167	GBC-1
Slc6a6	1.13602e-170	1.53395	0.934	0.34	2.20411e-166	HBC-4
Ctsl	1.46103e-170	1.022	0.606	0.152	2.83469e-166	HBC-1
Gpr162	1.72251e-170	0.525808	0.284	0.098	3.34202e-166	mOSN-1
Prdx6	2.08675e-170	1.59583	0.909	0.306	4.04872e-166	HBC-4
Fjx1	2.17473e-170	0.698111	0.267	0.014	4.21941e-166	HBC-3
Cacybp	2.27994e-170	0.529688	0.575	0.372	4.42355e-166	mOSN-1
Srm	2.49952e-170	0.441818	0.346	0.035	4.84957e-166	GBC-1
Tmem30b	2.79674e-170	0.498502	0.369	0.04	5.42624e-166	GBC-1
Cks1brt	2.93165e-170	0.352928	0.206	0.006	5.68798e-166	GBC-2
Ces1d	3.26669e-170	1.35333	0.779	0.134	6.33804e-166	HBC-3
1110004E09Rik	4.87183e-170	0.5379	0.503	0.29	9.45232e-166	mOSN-1
Lpp	5.52891e-170	0.662084	0.31	0.039	1.07272e-165	HBC-1
2020-09-03	6.20387e-170	0.650225	0.532	0.249	1.20367e-165	mOSN-3
Hist3h2ba	8.17956e-170	0.88387	0.708	0.276	1.587e-165	iOSN-2
Syce2	9.40831e-170	0.843341	0.606	0.059	1.8254e-165	GBC-2
Pax6	1.08503e-169	0.73458	0.363	0.054	2.10517e-165	HBC-1
Pcdh7	1.39515e-169	0.944878	0.641	0.166	2.70688e-165	HBC-1
Gins2	1.56241e-169	0.36355	0.24	0.017	3.03138e-165	GBC-1
Rps2	1.85163e-169	1.39454	0.983	0.65	3.59254e-165	GBC-1
Syt1	1.95093e-169	0.549701	0.659	0.348	3.78519e-165	mOSN-3
Dhfr	1.95236e-169	0.367841	0.265	0.02	3.78798e-165	GBC-1
Ip6k2	2.22577e-169	0.508227	0.653	0.445	4.31844e-165	mOSN-1
Mab21l1	2.32755e-169	0.659578	0.336	0.039	4.51592e-165	GBC-3
Ckap2	2.41088e-169	0.497123	0.352	0.019	4.6776e-165	GBC-2
Arhgdig	2.7517e-169	1.25348	0.817	0.26	5.33885e-165	iOSN-1
Kif11	3.36566e-169	0.396139	0.277	0.022	6.53005e-165	GBC-1
Suclg2	4.29238e-169	0.454892	0.413	0.05	8.32808e-165	GBC-1
Dapl1	5.17761e-169	0.958989	0.591	0.095	1.00456e-164	HBC-4
3110039M20Rik.1	1.12691e-168	0.538816	0.364	0.021	2.18643e-164	GBC-2
Cd9	1.26377e-168	0.457753	0.832	0.706	2.45197e-164	mOSN-1
Rab8b	1.39432e-168	0.726337	0.375	0.057	2.70526e-164	HBC-1
Tmem176b	2.13649e-168	1.10012	0.682	0.136	4.14522e-164	HBC-4
Lyar	2.93763e-168	0.75501	0.64	0.119	5.69959e-164	GBC-1
Racgap1	2.9923e-168	0.861049	0.493	0.086	5.80567e-164	GBC-3
Aqp5	3.33321e-168	0.811916	0.457	0.083	6.46709e-164	HBC-1
Casp8	3.46258e-168	0.272601	0.221	0.014	6.7181e-164	GBC-1
2020-09-15	4.0182e-168	0.443616	0.749	0.577	7.79612e-164	mOSN-1
Dpysl3	4.45303e-168	1.28535	0.905	0.197	8.63976e-164	GBC-4
Miat	7.7527e-168	0.702214	0.267	0.011	1.50418e-163	GBC-2
Txnip	7.86995e-168	1.09825	0.572	0.098	1.52693e-163	HBC-4
Sdcbp	8.67302e-168	0.46401	0.713	0.533	1.68274e-163	mOSN-1
Ttk	1.01824e-167	0.342146	0.23	0.008	1.97559e-163	GBC-2
Hmgn2	1.09108e-167	1.67901	0.958	0.551	2.11692e-163	GBC-1
Ppp1ca	1.90905e-167	0.792027	0.876	0.52	3.70394e-163	iOSN-2
Gldc	1.95567e-167	0.557148	0.351	0.148	3.79438e-163	mOSN-1
Hbb-bt	1.98072e-167	0.622771	0.968	0.445	3.843e-163	mOSN-4
Ndufb7	2.02242e-167	0.428646	0.763	0.599	3.92391e-163	mOSN-1
Arpc4	2.15565e-167	0.550372	0.567	0.357	4.1824e-163	mOSN-1
Tox	3.2665e-167	0.537365	0.418	0.028	6.33767e-163	GBC-2
Ldha	3.64107e-167	1.37813	0.71	0.119	7.06441e-163	HBC-3
Ifitm1	3.81545e-167	1.13384	0.626	0.114	7.40273e-163	HBC-4
Ndufa3	4.79176e-167	0.391217	0.825	0.703	9.29697e-163	mOSN-1
Lcn11	5.11292e-167	0.553712	0.42	0.149	9.92008e-163	mOSN-3
Stil	6.58159e-167	0.624685	0.31	0.034	1.27696e-162	GBC-3
Frmd4a	6.75118e-167	0.825177	0.427	0.077	1.30986e-162	HBC-1
2410004P03Rik	8.67482e-167	0.524861	0.293	0.107	1.68309e-162	mOSN-1
Enkur	9.09433e-167	0.534494	0.437	0.218	1.76448e-162	mOSN-1
Itga6	9.48404e-167	0.706339	0.33	0.031	1.84009e-162	HBC-4
Krt7	1.34264e-166	1.0125	0.359	0.027	2.60499e-162	HBC-3
Khdrbs2	1.60491e-166	0.706544	0.201	0.012	3.11386e-162	iOSN-1
Prune2	2.56206e-166	0.569297	0.393	0.182	4.97091e-162	mOSN-1
Six1	3.02886e-166	0.849927	0.474	0.081	5.8766e-162	GBC-3
Insm1	5.27309e-166	1.53386	0.939	0.172	1.02308e-161	GBC-2
Hist1h2ak	6.3513e-166	0.562516	0.236	0.008	1.23228e-161	GBC-2
Fam110a	6.46708e-166	0.598346	0.448	0.032	1.25474e-161	GBC-2
Atp1b3	1.05737e-165	0.89386	0.498	0.104	2.05152e-161	HBC-1
Chchd2	1.12858e-165	0.593771	0.994	0.896	2.18968e-161	iOSN-2
Grasp	1.64709e-165	0.819504	0.472	0.049	3.19568e-161	GBC-4
Endod1	1.74823e-165	0.543348	0.619	0.315	3.39191e-161	mOSN-3
Gpm6b	1.89351e-165	0.899886	0.52	0.114	3.67379e-161	HBC-1
1700123O20Rik	2.81243e-165	0.531167	0.492	0.285	5.45668e-161	mOSN-1
Rps3a1	2.98362e-165	1.03365	0.997	0.85	5.78882e-161	GBC-1
Bsn	3.30444e-165	0.512834	0.419	0.154	6.41128e-161	mOSN-3
Dlgap5	4.25383e-165	0.239295	0.207	0.012	8.25328e-161	GBC-1
Pbx1	4.63429e-165	1.40275	0.944	0.245	8.99145e-161	GBC-4
Pygo1	5.21639e-165	0.560773	0.598	0.299	1.01208e-160	mOSN-3
Arhgap11a	5.35803e-165	0.311341	0.265	0.021	1.03957e-160	GBC-1
Mapt	5.69838e-165	0.750368	0.394	0.044	1.1056e-160	iOSN-3
Ebf1	5.72061e-165	0.993213	0.997	0.834	1.10991e-160	iOSN-1
Foxp1	7.76459e-165	0.578277	0.644	0.357	1.50649e-160	mOSN-3
Gnas	7.985e-165	1.50719	0.965	0.265	1.54925e-160	GBC-4
Ermn	8.89387e-165	0.720378	0.333	0.046	1.72559e-160	HBC-1
Rpl14	1.31569e-164	1.06523	1	0.88	2.5527e-160	GBC-1
Mapk8ip2	1.55791e-164	0.540657	0.66	0.364	3.02266e-160	mOSN-3
Ube2s	1.58492e-164	0.655145	0.981	0.817	3.07506e-160	iOSN-2
Nme2	2.07787e-164	0.324043	0.254	0.019	4.03149e-160	GBC-1
Tmem176b	2.14696e-164	0.895645	0.565	0.132	4.16552e-160	HBC-1
Cacna1b	2.19641e-164	0.542916	0.422	0.16	4.26147e-160	mOSN-3
Laptm4a	2.46213e-164	1.05038	0.804	0.319	4.77703e-160	HBC-1
Acsl3	2.67916e-164	0.728437	0.567	0.096	5.19811e-160	GBC-1
Rtp1	2.68876e-164	0.469732	0.69	0.468	5.21673e-160	mOSN-1
Thsd7b	3.53392e-164	0.710006	0.355	0.045	6.85652e-160	GBC-3
Zfp428	3.92574e-164	0.972922	0.676	0.17	7.61672e-160	GBC-3
Cbr2	7.15957e-164	2.54848	1	0.41	1.3891e-159	HBC-3
Aqp5	7.45589e-164	1.61062	0.64	0.09	1.44659e-159	HBC-2
Elavl1	7.95704e-164	0.785981	0.687	0.14	1.54383e-159	GBC-1
Cdcp1	8.38209e-164	0.577615	0.241	0.024	1.62629e-159	HBC-1
Exoc6b	9.73053e-164	0.597133	0.504	0.224	1.88792e-159	mOSN-3
Marcksl1	9.90352e-164	1.10718	0.897	0.304	1.92148e-159	iOSN-1
Rfc4	1.237e-163	0.57392	0.427	0.056	2.40002e-159	GBC-1
Mxd3	1.27226e-163	0.325592	0.206	0.006	2.46844e-159	GBC-2
Casz1	1.29728e-163	0.547313	0.412	0.156	2.51698e-159	mOSN-3
Scd1	1.60423e-163	0.597203	0.231	0.022	3.11253e-159	HBC-1
Ikzf2	1.87662e-163	0.53602	0.452	0.18	3.64103e-159	mOSN-3
Dcx	2.56757e-163	0.561137	0.501	0.216	4.98159e-159	mOSN-3
Rpl32	2.74015e-163	1.07852	0.994	0.932	5.31645e-159	GBC-1
mt-Nd6	2.9496e-163	0.817783	0.393	0.157	5.72281e-159	mOSN-2
Tox3	4.18913e-163	0.757951	0.588	0.057	8.12775e-159	GBC-2
Cspp1	4.40498e-163	0.538086	0.648	0.355	8.54654e-159	mOSN-3
Axl	5.29724e-163	0.651467	0.272	0.015	1.02777e-158	HBC-3
Rpl10a	5.92182e-163	1.09569	0.992	0.714	1.14895e-158	GBC-1
Tox	6.05739e-163	0.317044	0.291	0.026	1.17525e-158	GBC-1
Slc43a1	7.29523e-163	0.278016	0.236	0.009	1.41542e-158	GBC-2
Rps5	1.1149e-162	1.11389	0.997	0.865	2.16313e-158	GBC-1
Abhd3	1.319e-162	0.51739	0.374	0.168	2.55912e-158	mOSN-1
Nop58	1.61041e-162	0.781621	0.656	0.13	3.12453e-158	GBC-1
Lamb3	2.74521e-162	0.789929	0.377	0.041	5.32626e-158	HBC-4
Vmo1	4.67424e-162	0.791585	0.515	0.277	9.06896e-158	mOSN-2
Actg1	4.7542e-162	1.0889	0.986	0.782	9.2241e-158	GBC-3
Sftpd	5.08798e-162	0.984089	0.304	0.02	9.87171e-158	HBC-3
Hmgb3	5.48323e-162	1.48368	0.952	0.192	1.06386e-157	GBC-2
Id4	8.39356e-162	1.40672	0.918	0.453	1.62852e-157	iOSN-1
Nasp	9.14815e-162	1.27248	0.83	0.126	1.77492e-157	GBC-2
Rufy3	1.79164e-161	0.517881	0.776	0.522	3.47615e-157	mOSN-3
Dst	1.88736e-161	1.0601	0.729	0.251	3.66186e-157	HBC-1
Kif5c	1.9999e-161	1.15834	0.744	0.174	3.88021e-157	iOSN-3
Plppr3	2.05403e-161	0.603265	0.344	0.069	3.98523e-157	iOSN-2
Mrpl27	2.33442e-161	0.530272	0.495	0.293	4.52924e-157	mOSN-1
Pgm2l1	2.39003e-161	0.414195	0.332	0.034	4.63713e-157	GBC-1
Rpl3	2.67476e-161	1.07726	1	0.832	5.18956e-157	GBC-1
Ube2c	2.95746e-161	1.26102	0.497	0.082	5.73806e-157	GBC-1
Ifitm2	4.02316e-161	1.12894	0.779	0.234	7.80573e-157	GBC-3
Rogdi	4.51858e-161	0.55409	0.422	0.214	8.76695e-157	mOSN-1
1810037I17Rik	5.82707e-161	0.447281	0.709	0.54	1.13057e-156	mOSN-1
Fen1	6.1187e-161	0.685885	0.509	0.043	1.18715e-156	GBC-2
Zfp608	7.64407e-161	1.04597	0.714	0.117	1.4831e-156	GBC-4
Ccl20	8.15264e-161	1.98471	0.305	0.018	1.58177e-156	HBC-2
Tspan1	1.31826e-160	0.517851	0.293	0.027	2.55769e-156	GBC-1
Heg1	1.63861e-160	0.94609	0.561	0.136	3.17924e-156	HBC-1
Schip1.1	1.89478e-160	0.502779	0.346	0.113	3.67625e-156	mOSN-3
Lamb3	1.96509e-160	0.979439	0.442	0.043	3.81266e-156	HBC-3
Marcksl1	2.64065e-160	1.0356	0.936	0.304	5.12339e-156	GBC-1
Dsp	2.74806e-160	1.05255	0.528	0.085	5.33179e-156	HBC-4
Lmnb1	2.875e-160	0.837087	0.661	0.073	5.57807e-156	GBC-2
Rnase4	3.14029e-160	0.655332	0.255	0.019	6.0928e-156	HBC-4
Frmd4a	3.29874e-160	0.907054	0.602	0.081	6.40022e-156	GBC-4
Spdl1	3.30159e-160	0.271421	0.206	0.006	6.40574e-156	GBC-2
Mex3a	3.75783e-160	1.03765	0.562	0.096	7.29095e-156	iOSN-3
Gng5	4.56842e-160	1.01948	0.897	0.287	8.86365e-156	GBC-1
Nav2	6.72997e-160	0.413102	0.349	0.038	1.30575e-155	GBC-1
Clu	1.16589e-159	1.47499	0.706	0.112	2.26207e-155	HBC-2
Elavl2	1.29636e-159	0.971617	0.64	0.154	2.51519e-155	GBC-3
Pcbp4	1.4365e-159	1.0184	0.739	0.093	2.7871e-155	GBC-2
Eif4a1	1.4816e-159	1.1002	0.964	0.584	2.87459e-155	GBC-3
Mtf2	2.04789e-159	1.20212	0.792	0.154	3.97332e-155	GBC-4
Plec	2.0851e-159	0.718927	0.362	0.039	4.04551e-155	HBC-4
Tmbim1	2.97008e-159	0.512385	0.227	0.021	5.76255e-155	HBC-1
Slc17a6	4.02781e-159	0.526156	0.517	0.229	7.81476e-155	mOSN-3
Dlk2	4.33574e-159	0.52547	0.204	0.017	8.41221e-155	HBC-1
Spef2	4.44967e-159	0.535289	0.67	0.365	8.63325e-155	mOSN-3
Sema3a	5.70291e-159	0.751354	0.45	0.046	1.10648e-154	GBC-4
Sfrp1	6.31994e-159	0.995646	0.45	0.06	1.22619e-154	HBC-4
Ifitm1	6.80121e-159	1.64947	0.716	0.117	1.31957e-154	HBC-2
Tsc22d3	7.88751e-159	1.57193	0.66	0.099	1.53033e-154	HBC-2
Lamtor5	1.007e-158	0.487314	0.62	0.432	1.95378e-154	mOSN-1
Scg2	1.5404e-158	0.947517	0.502	0.057	2.98869e-154	GBC-4
Ndufb6	1.65819e-158	0.49002	0.617	0.431	3.21722e-154	mOSN-1
Mcf2l	2.6665e-158	0.52976	0.646	0.349	5.17354e-154	mOSN-3
Pik3r1	3.21503e-158	0.982167	0.513	0.081	6.23781e-154	HBC-4
Gap43	3.33315e-158	1.45649	0.842	0.24	6.46698e-154	iOSN-3
Rpl10	3.33615e-158	0.707759	0.975	0.808	6.47281e-154	iOSN-2
Rcor2	6.95263e-158	0.552266	0.276	0.028	1.34895e-153	GBC-3
Clgn	8.74616e-158	0.475689	0.803	0.513	1.69693e-153	mOSN-3
Ifitm2	1.29133e-157	1.99624	0.982	0.243	2.50545e-153	GBC-2
Rps27a	1.65132e-157	0.916502	1	0.938	3.20389e-153	GBC-1
Ezh2	1.69099e-157	1.27935	0.891	0.151	3.28085e-153	GBC-2
Rps15a	2.25695e-157	1.03439	1	0.839	4.37893e-153	GBC-1
Emc4	2.69378e-157	0.529707	0.5	0.299	5.22648e-153	mOSN-1
Aldh2	2.95102e-157	0.950818	0.667	0.196	5.72557e-153	HBC-1
Dpysl3	3.30565e-157	1.05775	0.725	0.193	6.41362e-153	iOSN-1
Ccpg1os	4.44212e-157	0.534342	0.425	0.222	8.61861e-153	mOSN-1
Emp2	5.59989e-157	0.646944	0.267	0.021	1.08649e-152	HBC-4
Psip1	6.17648e-157	1.03441	0.983	0.635	1.19836e-152	GBC-3
S100a11	8.54555e-157	1.30332	0.777	0.202	1.65801e-152	HBC-4
Ces1d	8.71277e-157	1.63135	0.761	0.135	1.69045e-152	HBC-2
C330027C09Rik	8.82216e-157	0.309291	0.212	0.014	1.71168e-152	GBC-1
Ube2i	8.83136e-157	0.872026	0.802	0.204	1.71346e-152	GBC-1
Cks2	9.19328e-157	1.38927	0.732	0.198	1.78368e-152	GBC-1
Gm14744	3.29418e-156	0.458297	0.4	0.142	6.39136e-152	mOSN-3
Aldh3a1	5.48672e-156	0.640361	0.314	0.042	1.06453e-151	HBC-1
Pde8a	9.25893e-156	0.539029	0.26	0.041	1.79642e-151	iOSN-2
Dcdc2a	1.02529e-155	0.414366	0.696	0.446	1.98927e-151	mOSN-1
Ddx39	1.14094e-155	0.690294	0.556	0.097	2.21365e-151	GBC-1
Tmem2	1.2562e-155	0.80895	0.46	0.081	2.43727e-151	GBC-3
Ankrd24	1.84961e-155	0.732906	0.459	0.049	3.58862e-151	GBC-4
Acot13	2.55242e-155	0.543644	0.446	0.249	4.95221e-151	mOSN-1
Apoc1	2.74193e-155	1.91471	0.447	0.044	5.3199e-151	HBC-2
Sepw1	3.16843e-155	0.718862	0.931	0.688	6.14739e-151	iOSN-2
1700016K19Rik	3.80054e-155	0.500662	0.503	0.286	7.37382e-151	mOSN-1
Tle1	5.48268e-155	1.03056	0.517	0.102	1.06375e-150	iOSN-1
Cdkn1b	7.29218e-155	0.880079	0.6	0.063	1.41483e-150	GBC-2
Rhoc	7.74115e-155	1.05	0.488	0.055	1.50194e-150	HBC-3
Ezh2	8.30249e-155	1.0728	0.792	0.149	1.61085e-150	GBC-4
Cdk4	8.464e-155	1.01584	0.714	0.202	1.64219e-150	GBC-3
Rps6	8.64619e-155	0.974566	1	0.848	1.67753e-150	GBC-1
Slc43a2	1.31566e-154	0.48195	0.424	0.163	2.55264e-150	mOSN-3
Akna	1.59427e-154	0.438768	0.287	0.083	3.09321e-150	mOSN-3
Slc1a4	1.89543e-154	0.80964	0.376	0.064	3.67751e-150	HBC-1
Limch1	2.18214e-154	0.519606	0.438	0.176	4.23378e-150	mOSN-3
Nhp2	2.26062e-154	0.804596	0.654	0.137	4.38605e-150	GBC-1
Stmn4	2.431e-154	1.23896	0.885	0.492	4.71663e-150	iOSN-4
Gm8730	2.62178e-154	1.46144	0.83	0.26	5.08678e-150	GBC-1
Fbxo32	2.92954e-154	1.01458	0.714	0.121	5.68389e-150	GBC-4
Aox3	3.4208e-154	0.725446	0.258	0.014	6.63703e-150	HBC-3
Apoc1	3.82206e-154	0.95598	0.298	0.039	7.41556e-150	HBC-1
1700088E04Rik	4.03097e-154	0.52015	0.428	0.226	7.82088e-150	mOSN-1
Eif3f	4.49633e-154	1.24781	0.936	0.496	8.72378e-150	iOSN-1
Gnb2	5.76259e-154	0.956659	0.624	0.151	1.11806e-149	GBC-3
Rrm1	8.18984e-154	0.494991	0.399	0.051	1.58899e-149	GBC-1
Sub1	9.08502e-154	0.720567	0.991	0.893	1.76268e-149	iOSN-4
Rpl37a	1.0272e-153	0.770359	0.998	0.975	1.99297e-149	HBC-1
Cystm1	1.29902e-153	0.624829	0.985	0.762	2.52036e-149	iOSN-2
Rps29	2.65782e-153	0.256532	1	0.99	5.15671e-149	mOSN-3
Smchd1	2.79941e-153	1.50365	0.913	0.248	5.43141e-149	GBC-4
Tuba1a	3.34504e-153	0.904642	1	0.903	6.49005e-149	GBC-3
Rhobtb3	3.7206e-153	0.607506	0.385	0.035	7.2187e-149	GBC-4
Snrpe	4.45622e-153	1.00039	0.94	0.462	8.64596e-149	GBC-3
Gstm1	4.73798e-153	2.49127	0.985	0.343	9.19263e-149	HBC-2
Itgb1	8.52958e-153	0.863068	0.502	0.114	1.65491e-148	HBC-1
Tmem176a	1.04257e-152	0.788838	0.461	0.092	2.02278e-148	HBC-1
Rpl11	1.06549e-152	0.920057	1	0.864	2.06726e-148	GBC-1
Rps19	1.18976e-152	1.0496	0.997	0.935	2.30836e-148	GBC-1
Smarca2	2.25458e-152	0.857043	0.473	0.101	4.37434e-148	HBC-1
Tns4	2.39281e-152	0.781081	0.3	0.02	4.64253e-148	HBC-3
Rfc4	2.64809e-152	0.748798	0.582	0.059	5.13783e-148	GBC-2
Rpl27a	2.66431e-152	0.973243	1	0.845	5.1693e-148	GBC-1
Mpzl2	2.67318e-152	0.584254	0.245	0.018	5.18651e-148	HBC-4
Ppil1	2.91585e-152	0.532855	0.472	0.071	5.65732e-148	GBC-1
Lmo1	3.66092e-152	0.556839	0.483	0.074	7.10291e-148	GBC-1
Hmgb2	3.98065e-152	1.72737	0.947	0.561	7.72326e-148	GBC-1
Ly6e	4.28863e-152	1.48447	0.774	0.159	8.3208e-148	HBC-3
Ppia	4.68189e-152	1.02527	1	0.932	9.08379e-148	GBC-1
Tmem57	6.50659e-152	0.962933	0.671	0.177	1.26241e-147	GBC-3
Ckmt1	8.56387e-152	1.19851	0.876	0.392	1.66156e-147	GBC-3
Rps19	1.3487e-151	0.92661	1	0.934	2.61674e-147	iOSN-1
Rps8	2.1542e-151	0.907223	0.997	0.921	4.17957e-147	GBC-1
Cdk6	2.71358e-151	0.674931	0.461	0.07	5.26489e-147	GBC-1
Uncx	2.77055e-151	0.448552	0.698	0.49	5.37542e-147	mOSN-1
H2afx	2.78436e-151	1.03544	0.603	0.129	5.40222e-147	GBC-1
Rps16	3.32231e-151	0.955876	0.997	0.847	6.44594e-147	GBC-1
Epb41l1	4.32112e-151	0.483021	0.355	0.122	8.38384e-147	mOSN-3
Nup37	4.36175e-151	0.454441	0.383	0.048	8.46268e-147	GBC-1
Klc2	4.36232e-151	0.520111	0.401	0.203	8.46378e-147	mOSN-1
Rps9	4.83756e-151	0.909222	1	0.907	9.38584e-147	GBC-1
Hmgn5	6.76275e-151	1.32793	0.903	0.17	1.31211e-146	GBC-2
Med21	6.85454e-151	0.480125	0.641	0.453	1.32992e-146	mOSN-1
A830039N20Rik	7.2197e-151	0.459495	0.321	0.102	1.40077e-146	mOSN-3
Sox11	8.58535e-151	0.440499	0.825	0.343	1.66573e-146	iOSN-2
Prmt8	9.06793e-151	0.497602	0.281	0.019	1.75936e-146	GBC-4
Hmgn1	9.29587e-151	1.15505	0.961	0.546	1.80358e-146	GBC-1
Htatip2	1.21637e-150	0.541171	0.381	0.187	2.35999e-146	mOSN-1
Rps4x	1.32906e-150	1.00942	0.992	0.829	2.57864e-146	GBC-1
Hist1h2ae	1.36445e-150	0.909038	0.442	0.036	2.64731e-146	GBC-2
Lbp	1.40111e-150	0.515837	0.217	0.014	2.71843e-146	HBC-4
Svil	1.75882e-150	0.533064	0.231	0.024	3.41246e-146	HBC-1
Nrep	1.96933e-150	0.854071	0.567	0.123	3.8209e-146	GBC-3
Prss23	2.37769e-150	0.723897	0.29	0.019	4.6132e-146	HBC-3
Nme4	2.50825e-150	0.303685	0.263	0.023	4.86651e-146	GBC-1
Gnas	2.7464e-150	0.817226	0.919	0.26	5.32856e-146	GBC-1
Dnmt1	3.62883e-150	0.579317	0.483	0.075	7.04065e-146	GBC-1
Itga6	4.96325e-150	0.560082	0.255	0.029	9.62969e-146	HBC-1
Frat2	5.59724e-150	0.464018	0.369	0.045	1.08598e-145	GBC-1
H3f3b	6.48611e-150	0.403508	0.999	0.992	1.25843e-145	iOSN-2
Odc1	6.94472e-150	0.721882	0.656	0.134	1.34741e-145	GBC-1
Hist1h2ap	9.20997e-150	1.74075	0.48	0.081	1.78692e-145	GBC-1
Ftl1	9.49056e-150	1.00292	0.997	0.843	1.84136e-145	iOSN-1
Rps24	1.84158e-149	0.893851	0.997	0.894	3.57303e-145	GBC-1
Rpl22	2.05491e-149	1.07631	0.972	0.549	3.98694e-145	GBC-1
Smchd1	2.42294e-149	1.56251	0.733	0.245	4.70099e-145	iOSN-1
Clstn2	2.64955e-149	0.519882	0.643	0.353	5.14066e-145	mOSN-3
Uqcrc1	3.03069e-149	0.476028	0.578	0.396	5.88014e-145	mOSN-1
Cdyl2	3.06844e-149	0.873183	0.416	0.066	5.95339e-145	iOSN-1
Rps21	4.20598e-149	1.3055	0.997	0.727	8.16045e-145	HBC-4
Prrc2c	4.21027e-149	0.534264	0.639	0.36	8.16878e-145	mOSN-3
Rpl13	4.82275e-149	0.942295	0.997	0.926	9.35709e-145	GBC-1
Stk32a	5.99233e-149	0.649656	0.293	0.027	1.16263e-144	iOSN-3
Agtpbp1	6.04719e-149	0.533393	0.517	0.242	1.17328e-144	mOSN-3
Rpl36a	6.57619e-149	1.00521	0.994	0.712	1.27591e-144	GBC-1
Nav1	6.66064e-149	0.528247	0.524	0.25	1.2923e-144	mOSN-3
Cbx5	7.73908e-149	0.599013	0.584	0.106	1.50154e-144	GBC-1
Ces2g	9.6544e-149	0.491113	0.217	0.014	1.87315e-144	HBC-4
Qdpr	9.81006e-149	1.22954	0.798	0.213	1.90335e-144	iOSN-3
Gm1673	1.01346e-148	0.75048	0.695	0.285	1.96631e-144	iOSN-2
Stoml3	1.42077e-148	0.403309	0.992	0.801	2.75658e-144	mOSN-3
Cenpu	1.44438e-148	0.348336	0.242	0.01	2.80239e-144	GBC-2
Rhoc	2.01862e-148	1.25159	0.492	0.056	3.91653e-144	HBC-2
Dclk1	2.36858e-148	1.07197	0.71	0.161	4.59551e-144	iOSN-3
Topbp1	2.47706e-148	0.420938	0.355	0.042	4.80599e-144	GBC-1
Nmral1	2.61121e-148	0.36125	0.277	0.026	5.06627e-144	GBC-1
Hat1	2.99105e-148	0.592523	0.517	0.086	5.80323e-144	GBC-1
Sec14l3	3.10702e-148	0.742582	0.291	0.094	6.02824e-144	mOSN-2
Lrp4	3.53169e-148	0.408662	0.212	0.015	6.85218e-144	GBC-1
Itgb3bp	4.60531e-148	0.73692	0.63	0.07	8.93522e-144	GBC-2
Fam107a	5.55364e-148	0.580811	0.255	0.03	1.07752e-143	HBC-1
Mettl7a1	5.86961e-148	1.10812	0.623	0.126	1.13882e-143	HBC-4
Rrm2	6.51215e-148	0.830894	0.442	0.036	1.26349e-143	GBC-2
Nufip2	7.45712e-148	0.49803	0.365	0.134	1.44683e-143	mOSN-3
Carns1	8.70074e-148	0.50611	0.661	0.363	1.68812e-143	mOSN-3
Rpsa	1.00555e-147	1.0029	0.986	0.722	1.95096e-143	GBC-1
Unc5b	1.1977e-147	0.518333	0.426	0.174	2.32378e-143	mOSN-3
Cd81	1.30641e-147	0.793852	0.976	0.756	2.53469e-143	iOSN-4
Naca	1.5399e-147	0.916797	0.997	0.758	2.98771e-143	GBC-1
Rpl6	1.77575e-147	0.939173	0.992	0.823	3.44532e-143	GBC-1
S100a8	2.22007e-147	0.601629	0.998	0.678	4.30737e-143	mOSN-4
Cldn7	2.48616e-147	0.680737	0.404	0.101	4.82364e-143	iOSN-2
Rps3	3.37423e-147	0.910559	0.997	0.858	6.54669e-143	GBC-1
Saxo2	3.59466e-147	0.52232	0.42	0.222	6.97435e-143	mOSN-1
Pdap1	4.102e-147	0.773618	0.843	0.463	7.95869e-143	iOSN-2
Id2	4.92909e-147	1.2791	0.818	0.134	9.56342e-143	GBC-2
Cit	5.10717e-147	0.398727	0.273	0.013	9.90892e-143	GBC-2
Bfsp2	5.17274e-147	0.647073	0.211	0.016	1.00362e-142	iOSN-1
Gcnt1	6.76055e-147	0.512394	0.204	0.019	1.31168e-142	HBC-1
Cystm1	8.40175e-147	0.751667	0.983	0.766	1.63011e-142	iOSN-4
Rpl37	1.03377e-146	0.781638	0.996	0.92	2.00571e-142	HBC-1
Irf6	1.11686e-146	0.756209	0.41	0.077	2.16694e-142	HBC-1
Ddah2	1.84465e-146	1.12798	0.656	0.169	3.57899e-142	iOSN-1
Nrcam	2.23231e-146	1.05616	0.386	0.033	4.33113e-142	HBC-2
Park7	2.67291e-146	0.390376	0.79	0.628	5.18599e-142	mOSN-1
Jun	2.77451e-146	1.12731	0.869	0.34	5.38311e-142	iOSN-1
Gng3	3.9033e-146	0.549822	0.201	0.026	7.57319e-142	iOSN-2
Rad51ap1	5.2568e-146	0.328825	0.24	0.02	1.01993e-141	GBC-1
Rpl17	6.38282e-146	0.954736	0.997	0.821	1.2384e-141	GBC-1
Rpl35a	7.51474e-146	0.893547	1	0.856	1.45801e-141	GBC-1
Nuf2	1.01619e-145	0.238747	0.201	0.013	1.97161e-141	GBC-1
Stmn2	1.46123e-145	1.13634	0.974	0.627	2.83507e-141	GBC-3
Ptpn14	1.94521e-145	0.546302	0.239	0.018	3.77409e-141	HBC-4
Pafah1b1	1.96386e-145	0.507132	0.749	0.497	3.81028e-141	mOSN-3
Psmb3	3.1624e-145	0.407323	0.73	0.554	6.1357e-141	mOSN-1
Rpl18a	3.60234e-145	0.894508	0.997	0.943	6.98925e-141	GBC-1
Gmnn	3.79477e-145	0.592767	0.469	0.073	7.3626e-141	GBC-1
Cdca7l	3.8472e-145	0.242314	0.209	0.015	7.46434e-141	GBC-1
Xpr1	3.97524e-145	0.534276	0.511	0.244	7.71276e-141	mOSN-3
Met	5.78072e-145	0.506782	0.216	0.021	1.12158e-140	HBC-1
Slc12a2	5.92939e-145	0.501134	0.693	0.407	1.15042e-140	mOSN-3
Neurog1	5.99071e-145	0.543545	0.224	0.02	1.16232e-140	GBC-3
Rpl41	6.12318e-145	0.698796	1	0.996	1.18802e-140	GBC-1
Gap43	7.08548e-145	0.777738	0.695	0.234	1.37472e-140	iOSN-4
Syt7	7.18169e-145	0.503134	0.54	0.259	1.39339e-140	mOSN-3
Camp	7.88972e-145	0.46335	0.675	0.377	1.53076e-140	mOSN-3
Hist3h2ba	8.55422e-145	1.28263	0.789	0.288	1.65969e-140	iOSN-1
Mfng	1.17832e-144	0.452809	0.363	0.045	2.28618e-140	GBC-1
Fignl1	1.36058e-144	0.443964	0.285	0.015	2.63981e-140	GBC-2
Efna3	1.5128e-144	0.510754	0.612	0.417	2.93513e-140	mOSN-1
Map1lc3a	1.74072e-144	0.389035	0.745	0.578	3.37734e-140	mOSN-1
Basp1	1.79015e-144	1.13389	0.874	0.197	3.47324e-140	GBC-4
Hmgb1	2.2949e-144	1.29097	0.997	0.826	4.45256e-140	GBC-1
Tacstd2	2.66772e-144	0.706281	0.302	0.03	5.17592e-140	HBC-4
Rps5	3.01819e-144	0.877859	0.992	0.865	5.85589e-140	iOSN-1
Enc1	3.02624e-144	0.743958	0.437	0.048	5.87151e-140	GBC-4
Sat1	3.03591e-144	1.32532	0.687	0.127	5.89026e-140	HBC-3
Dynll1	3.29522e-144	0.292961	0.918	0.789	6.39338e-140	mOSN-1
Rgs3	3.41811e-144	0.518468	0.359	0.172	6.63182e-140	mOSN-1
Mycbp2	3.67514e-144	0.53651	0.658	0.393	7.1305e-140	mOSN-3
Rpl37a	4.20171e-144	1.11693	1	0.975	8.15216e-140	HBC-4
Map1lc3b	5.44289e-144	1.05682	0.961	0.592	1.05603e-139	iOSN-1
Cdc42ep3	9.93861e-144	0.825842	0.433	0.09	1.92829e-139	HBC-1
Rps17	1.25477e-143	0.901366	0.994	0.843	2.4345e-139	GBC-1
Kif23	2.38751e-143	0.276727	0.204	0.014	4.63224e-139	GBC-1
Zhx1	2.58497e-143	0.808826	0.567	0.079	5.01536e-139	GBC-4
Gsta4	2.61026e-143	1.04876	0.535	0.094	5.06443e-139	HBC-4
Dbp	2.64097e-143	1.34571	0.497	0.059	5.12401e-139	HBC-2
Gpc3	2.7405e-143	0.698681	0.244	0.014	5.31711e-139	HBC-3
Hint2	3.13034e-143	0.504989	0.547	0.36	6.07348e-139	mOSN-1
Cntn4	3.22281e-143	0.464173	0.778	0.502	6.25291e-139	mOSN-3
Rundc3a	4.20126e-143	0.470996	0.563	0.363	8.15128e-139	mOSN-1
Snai2	4.62348e-143	0.896686	0.34	0.026	8.97047e-139	HBC-2
Sytl2	4.66415e-143	0.460213	0.29	0.089	9.04939e-139	mOSN-3
Tox3	4.692e-143	0.700254	0.36	0.054	9.10341e-139	GBC-3
Ldlr	4.71352e-143	0.548906	0.239	0.027	9.14517e-139	HBC-1
Timm17a	5.51764e-143	0.474623	0.556	0.371	1.07053e-138	mOSN-1
Lpp	5.82085e-143	0.705718	0.355	0.042	1.12936e-138	HBC-4
Rtp2	5.8827e-143	0.44517	0.622	0.413	1.14136e-138	mOSN-1
Rps28	1.26256e-142	1.4188	1	0.839	2.44962e-138	HBC-4
Qser1	1.31678e-142	0.686647	0.503	0.048	2.55481e-138	GBC-2
Srebf1	1.7246e-142	0.633025	0.312	0.046	3.34607e-138	HBC-1
Dpcd	1.94562e-142	0.490739	0.537	0.349	3.7749e-138	mOSN-1
Ctnnal1	2.24694e-142	0.492276	0.202	0.019	4.35952e-138	HBC-1
Rad51ap1	2.74508e-142	0.46977	0.339	0.022	5.32601e-138	GBC-2
Nhlh1	4.34028e-142	0.636029	0.34	0.074	8.42102e-138	iOSN-2
Rpl26	5.18053e-142	0.83902	0.997	0.921	1.00513e-137	GBC-1
Mex3a	5.8962e-142	1.06809	0.721	0.099	1.14398e-137	GBC-2
Nt5dc2	8.15268e-142	0.595004	0.436	0.036	1.58178e-137	GBC-2
Cenpq	1.37876e-141	0.684081	0.521	0.051	2.67507e-137	GBC-2
Cenpm	1.42369e-141	0.407877	0.315	0.019	2.76224e-137	GBC-2
Ywhah	1.61132e-141	0.757992	0.835	0.487	3.12629e-137	iOSN-2
C1qtnf4	1.83404e-141	1.05865	0.695	0.209	3.5584e-137	GBC-3
Fkbp9	2.14405e-141	0.512558	0.229	0.025	4.15989e-137	HBC-1
Zfp644	2.23939e-141	1.18965	0.735	0.245	4.34486e-137	iOSN-1
2020-09-01	2.48969e-141	0.598332	0.332	0.072	4.8305e-137	iOSN-2
Anxa4	2.5088e-141	0.648835	0.31	0.041	4.86757e-137	GBC-3
Itgb3bp	2.53839e-141	0.483848	0.444	0.067	4.92499e-137	GBC-1
Fmo2	2.63747e-141	1.13287	0.479	0.057	5.11722e-137	HBC-3
Otx2	3.72097e-141	0.486214	0.439	0.066	7.21942e-137	GBC-1
Rpl18	4.12598e-141	0.95374	0.986	0.737	8.00522e-137	GBC-1
Col9a2	4.86688e-141	0.678915	0.468	0.054	9.44272e-137	GBC-4
Polr3k	5.13252e-141	0.599094	0.55	0.101	9.95811e-137	GBC-1
Zfp467	5.9142e-141	0.672634	0.343	0.057	1.14747e-136	HBC-1
S100a11	6.0475e-141	1.50315	0.868	0.206	1.17334e-136	HBC-2
Bex4	6.13487e-141	0.55482	0.408	0.058	1.19029e-136	GBC-1
Cbr2	8.01346e-141	2.26933	1	0.41	1.55477e-136	HBC-2
Ddah2	8.02971e-141	1.36202	0.903	0.175	1.55792e-136	GBC-2
Slc15a2	8.17666e-141	1.20203	0.523	0.066	1.58644e-136	HBC-2
Fabp5	9.03851e-141	0.704454	0.494	0.148	1.75365e-136	iOSN-2
Lypd2	1.08906e-140	0.990798	0.579	0.111	2.11299e-136	HBC-4
Rbm24	1.17513e-140	0.480329	0.36	0.046	2.27998e-136	GBC-1
Fgf12	1.57823e-140	0.461368	0.498	0.289	3.06208e-136	mOSN-1
Cks2	3.42927e-140	1.76511	0.909	0.204	6.65347e-136	GBC-2
Sbk1	4.24294e-140	0.858655	0.655	0.174	8.23216e-136	GBC-3
Bcl11b	4.93336e-140	1.60279	0.944	0.313	9.5717e-136	GBC-4
Tgif1	5.375e-140	0.649088	0.485	0.045	1.04286e-135	GBC-2
Myo1b	6.07835e-140	0.742803	0.519	0.068	1.17932e-135	GBC-4
Hes6	6.32696e-140	1.85426	0.964	0.22	1.22756e-135	GBC-2
Ctps	7.28589e-140	0.312363	0.265	0.025	1.41361e-135	GBC-1
Rpl12	7.42112e-140	1.04275	0.978	0.561	1.43985e-135	GBC-1
Tagln3	8.36459e-140	0.633127	0.214	0.019	1.6229e-135	GBC-3
Rps12	1.22807e-139	0.912848	0.959	0.691	2.38269e-135	HBC-1
Hmgn3	1.29224e-139	0.718816	0.974	0.85	2.50721e-135	iOSN-4
Rplp2	1.34582e-139	0.936445	0.992	0.879	2.61115e-135	GBC-1
Rps7	1.39312e-139	0.945473	0.989	0.828	2.70294e-135	GBC-1
Ccl20	1.63274e-139	1.95499	0.272	0.018	3.16783e-135	HBC-3
Skp2	1.71371e-139	0.302738	0.229	0.019	3.32495e-135	GBC-1
Qdpr	2.07299e-139	1.27472	0.874	0.216	4.02202e-135	GBC-4
Kif1b	2.15446e-139	0.501019	0.633	0.357	4.18008e-135	mOSN-3
Hist1h1b	2.21222e-139	0.628443	0.249	0.022	4.29215e-135	GBC-1
Tcf4	2.45191e-139	1.13657	0.899	0.36	4.7572e-135	GBC-1
Tshz1	2.84978e-139	1.34999	0.922	0.273	5.52915e-135	GBC-4
Sostdc1	3.94311e-139	0.702029	0.213	0.01	7.65042e-135	HBC-2
Elf3	4.01479e-139	0.645988	0.245	0.02	7.7895e-135	HBC-4
Fam103a1	4.20091e-139	0.703253	0.865	0.518	8.15061e-135	iOSN-2
Eef1a1	4.50915e-139	0.979823	1	0.865	8.74865e-135	GBC-1
2900026A02Rik	5.09974e-139	0.638051	0.305	0.032	9.89452e-135	HBC-4
Ptbp1	6.8471e-139	0.494938	0.522	0.09	1.32847e-134	GBC-1
Smarca5	6.95527e-139	1.19941	0.869	0.404	1.34946e-134	iOSN-1
Pdpn	1.04358e-138	1.1132	0.421	0.042	2.02475e-134	HBC-2
Stmn2	1.08608e-138	1.24769	0.997	0.63	2.10722e-134	iOSN-3
Hcfc1r1	1.43902e-138	0.71726	0.822	0.427	2.79199e-134	iOSN-2
Ckap2	1.86438e-138	0.326816	0.223	0.018	3.61727e-134	GBC-1
Lamp1	2.69993e-138	0.42218	0.697	0.544	5.23841e-134	mOSN-1
Atp6v1g1	3.16187e-138	0.591663	0.97	0.758	6.13465e-134	iOSN-2
Hdgf	3.34704e-138	1.13887	0.897	0.399	6.49392e-134	GBC-1
Zfp422	3.67156e-138	0.577727	0.506	0.087	7.12356e-134	GBC-1
Dera	5.11124e-138	0.305961	0.271	0.026	9.91683e-134	GBC-1
Ablim1	5.98849e-138	0.642419	0.344	0.04	1.16189e-133	iOSN-3
Cotl1	6.6505e-138	0.670185	0.727	0.311	1.29033e-133	iOSN-2
Arpc5l	7.68529e-138	0.807152	0.777	0.418	1.4911e-133	iOSN-2
Dcn	1.03071e-137	1.13852	0.409	0.059	1.99978e-133	HBC-4
Calm1	1.69017e-137	0.568865	1	0.982	3.27926e-133	mOSN-4
Tns3	1.99008e-137	0.868556	0.399	0.056	3.86116e-133	HBC-4
Rps21	2.1349e-137	0.89201	0.969	0.724	4.14213e-133	HBC-1
Cnn2	2.28434e-137	0.615215	0.298	0.044	4.43207e-133	HBC-1
Rps7	2.61809e-137	0.892484	0.985	0.828	5.07961e-133	iOSN-1
Rpl37	3.65972e-137	1.12925	1	0.921	7.10058e-133	HBC-4
Pcbp4	4.53583e-137	0.829587	0.46	0.089	8.80043e-133	GBC-3
Rps20	5.65628e-137	0.952382	0.997	0.726	1.09743e-132	GBC-1
Nlk	6.13232e-137	1.1043	0.835	0.193	1.18979e-132	GBC-4
Rps23	6.98846e-137	0.832708	0.997	0.928	1.3559e-132	GBC-1
Crlf3	1.04211e-136	0.789613	0.511	0.068	2.02191e-132	GBC-4
Fam49b	1.28948e-136	0.456978	0.475	0.077	2.50186e-132	GBC-1
Kmt2a	1.39595e-136	0.513883	0.482	0.229	2.70843e-132	mOSN-3
Cep120	1.56812e-136	0.882986	0.576	0.088	3.04246e-132	GBC-4
Herc1	1.83105e-136	0.508108	0.565	0.3	3.55261e-132	mOSN-3
Eif4a2	2.01552e-136	0.387318	0.771	0.643	3.91052e-132	mOSN-1
Eya1	2.03105e-136	0.486209	0.522	0.091	3.94065e-132	GBC-1
Rangrf	2.30501e-136	0.461264	0.313	0.036	4.47217e-132	GBC-1
Id1	3.61435e-136	0.999636	0.709	0.097	7.01256e-132	GBC-2
Prc1	3.74758e-136	0.561274	0.346	0.045	7.27106e-132	GBC-1
Sdc2	4.30861e-136	0.483663	0.391	0.2	8.35957e-132	mOSN-1
Eif4ebp1	4.61725e-136	0.577467	0.287	0.057	8.95839e-132	iOSN-2
Rpl8	6.73132e-136	0.843607	0.994	0.841	1.30601e-131	GBC-1
Rpl39	8.1315e-136	0.756973	0.99	0.882	1.57767e-131	HBC-1
Rnf128	8.76829e-136	0.477496	0.67	0.381	1.70122e-131	mOSN-3
Ifitm3	1.01418e-135	1.02668	0.736	0.188	1.96772e-131	HBC-4
Pcna	1.24792e-135	0.787818	0.556	0.111	2.42121e-131	GBC-1
St18	1.25633e-135	0.462422	0.221	0.013	2.43753e-131	GBC-4
1110032A03Rik	1.42561e-135	0.500368	0.441	0.257	2.76596e-131	mOSN-1
Kif5c	1.65255e-135	1.10242	0.632	0.175	3.20627e-131	iOSN-1
Asf1b	1.98879e-135	0.273377	0.212	0.016	3.85865e-131	GBC-1
Sox9	2.08927e-135	0.56256	0.231	0.026	4.0536e-131	HBC-1
Ssfa2	2.42147e-135	0.646025	0.321	0.036	4.69814e-131	HBC-4
Ly6e	2.97049e-135	1.11367	0.657	0.157	5.76334e-131	HBC-4
Prrc2b	3.05776e-135	0.44767	0.763	0.505	5.93266e-131	mOSN-3
Fam136a	3.83733e-135	0.533897	0.447	0.071	7.44519e-131	GBC-1
Ccdc28b	4.29117e-135	0.498903	0.423	0.234	8.32573e-131	mOSN-1
Fzd7	5.22204e-135	0.574014	0.231	0.027	1.01318e-130	HBC-1
Hes1	5.66032e-135	1.05902	0.494	0.085	1.09821e-130	HBC-4
Gadd45g	7.38224e-135	0.986189	0.588	0.07	1.4323e-130	GBC-2
Scg5	7.72456e-135	0.464909	0.486	0.29	1.49872e-130	mOSN-1
2610037D02Rik	8.68936e-135	0.509297	0.408	0.171	1.68591e-130	mOSN-3
Rpl13a	9.0729e-135	0.794982	1	0.929	1.76032e-130	GBC-1
Mgst1	1.9875e-134	0.769188	0.365	0.155	3.85615e-130	mOSN-2
Dpysl3	3.75622e-134	0.863549	0.693	0.193	7.28781e-130	GBC-3
Mgat3	3.88579e-134	0.654832	0.311	0.034	7.53921e-130	HBC-4
Tmem158	6.80832e-134	0.637289	0.24	0.015	1.32095e-129	HBC-3
Rpl13	6.99599e-134	1.7091	1	0.927	1.35736e-129	HBC-3
Eed	8.71154e-134	1.15152	0.842	0.149	1.69021e-129	GBC-2
Mien1	1.1704e-133	0.446025	0.602	0.435	2.27081e-129	mOSN-1
Cep152	1.2773e-133	0.614863	0.319	0.045	2.47822e-129	GBC-3
Lbp	1.52984e-133	0.707989	0.244	0.015	2.9682e-129	HBC-3
Hp1bp3	1.56578e-133	0.505649	0.609	0.343	3.03792e-129	mOSN-3
Hist1h2ap	1.61984e-133	2.15687	0.624	0.085	3.14282e-129	GBC-2
Gdpd1	1.65585e-133	0.667342	0.312	0.043	3.21269e-129	GBC-3
Cav2	2.05728e-133	0.710749	0.249	0.016	3.99153e-129	HBC-3
Prim1	2.4372e-133	0.384881	0.318	0.038	4.72865e-129	GBC-1
Pafah1b3	2.98826e-133	0.750316	0.722	0.333	5.79782e-129	iOSN-2
S100a16	3.76753e-133	1.10415	0.452	0.051	7.30975e-129	HBC-2
Trps1	3.87087e-133	0.499027	0.449	0.201	7.51026e-129	mOSN-3
Ran	4.11645e-133	1.15811	0.911	0.522	7.98673e-129	GBC-1
Rpl36	4.56406e-133	0.864155	0.997	0.815	8.85519e-129	GBC-1
Rap1gds1	5.27789e-133	0.493155	0.639	0.359	1.02402e-128	mOSN-3
Rbm24	7.26283e-133	0.649082	0.321	0.045	1.40914e-128	GBC-3
Acpp	8.34015e-133	0.496905	0.214	0.016	1.61816e-128	HBC-4
Hist1h2ae	9.16973e-133	0.582754	0.296	0.034	1.77911e-128	GBC-1
Rasal2	1.30386e-132	0.489441	0.442	0.196	2.52976e-128	mOSN-3
Celf3	1.62729e-132	0.705405	0.535	0.184	3.15728e-128	iOSN-2
Mis18a	1.86041e-132	0.379689	0.36	0.048	3.60956e-128	GBC-1
Rpa2	2.34097e-132	0.455222	0.372	0.051	4.54196e-128	GBC-1
Peg3	2.44022e-132	0.475181	0.289	0.095	4.73452e-128	mOSN-3
Map4k4	2.46661e-132	0.882764	0.636	0.108	4.78572e-128	GBC-4
BC049352	2.63209e-132	0.463167	0.504	0.307	5.10677e-128	mOSN-1
Hn1	3.01123e-132	1.09148	0.859	0.345	5.84238e-128	iOSN-1
Fam213a	3.19833e-132	0.485321	0.564	0.369	6.20541e-128	mOSN-1
Gm42418	3.62132e-132	1.14993	0.929	0.482	7.02608e-128	HBC-1
Prmt1	3.68893e-132	0.846698	0.669	0.19	7.15726e-128	GBC-3
Tle1	3.93876e-132	0.744919	0.488	0.102	7.64198e-128	GBC-3
Sfn	4.87923e-132	1.09387	0.437	0.048	9.46669e-128	HBC-2
Emc7	8.63862e-132	0.469491	0.54	0.352	1.67607e-127	mOSN-1
Clec2d	9.27357e-132	0.602943	0.261	0.024	1.79926e-127	HBC-4
Rps5	1.05772e-131	0.741959	0.995	0.865	2.0522e-127	GBC-3
Cdk2	1.11809e-131	0.270589	0.204	0.016	2.16931e-127	GBC-1
Fth1	1.15459e-131	0.722361	0.994	0.969	2.24013e-127	HBC-1
Mpc2	1.20046e-131	0.46073	0.552	0.377	2.32912e-127	mOSN-1
Gsta3	1.44873e-131	1.12496	0.487	0.06	2.81083e-127	HBC-2
Tnfrsf1a	1.68166e-131	0.501252	0.22	0.025	3.26276e-127	HBC-1
Kpna2	1.86052e-131	0.674585	0.369	0.052	3.60978e-127	GBC-1
Gstm1	1.92989e-131	1.33026	0.982	0.342	3.74437e-127	HBC-3
Eed	2.2403e-131	0.777838	0.631	0.144	4.34662e-127	GBC-1
Serpinh1	2.41552e-131	0.559907	0.251	0.033	4.68659e-127	HBC-1
Rev1	2.57941e-131	0.83059	0.571	0.088	5.00456e-127	GBC-4
Sult1d1	2.59552e-131	0.795557	0.977	0.692	5.03583e-127	mOSN-4
Psmc5	2.91046e-131	0.435106	0.605	0.425	5.64688e-127	mOSN-1
Pten	3.22169e-131	0.511783	0.558	0.296	6.25073e-127	mOSN-3
Rplp0	3.22221e-131	0.851876	0.979	0.677	6.25172e-127	GBC-3
Prss33	3.28206e-131	0.329094	0.257	0.025	6.36785e-127	GBC-1
Sypl	3.30147e-131	0.837858	0.535	0.145	6.40552e-127	HBC-1
Ankrd24	3.79188e-131	0.587403	0.326	0.047	7.357e-127	GBC-3
Slc47a1	4.7252e-131	0.898518	0.325	0.026	9.16783e-127	HBC-2
H3f3a	4.82704e-131	0.825647	0.997	0.918	9.36543e-127	iOSN-1
Lhx2	5.34773e-131	1.72486	1	0.577	1.03757e-126	GBC-4
Rpl35	6.07234e-131	0.872368	0.992	0.867	1.17815e-126	GBC-1
Kcnma1	6.54964e-131	0.458268	0.367	0.141	1.27076e-126	mOSN-3
Wdr66	7.69155e-131	0.998333	0.594	0.153	1.49231e-126	iOSN-1
Phlda1	7.79973e-131	0.731451	0.483	0.086	1.5133e-126	GBC-1
Twf1	8.68859e-131	1.28606	0.931	0.286	1.68576e-126	GBC-4
Tmsb10	1.04161e-130	1.15518	1	0.775	2.02094e-126	iOSN-3
Fah	1.52588e-130	0.707036	0.228	0.012	2.96052e-126	HBC-2
Atad2	2.10845e-130	0.360133	0.24	0.022	4.09081e-126	GBC-1
Tmem176b	2.44154e-130	1.48306	0.716	0.141	4.73708e-126	HBC-2
Dynll1	2.66698e-130	0.549779	0.984	0.818	5.17448e-126	iOSN-2
Vsnl1	2.75465e-130	0.474316	0.307	0.135	5.34457e-126	mOSN-1
Dmrta2	3.16373e-130	0.763923	0.558	0.063	6.13826e-126	GBC-2
Dmrta2	3.35267e-130	0.644085	0.335	0.059	6.50486e-126	HBC-1
Anxa2	3.84933e-130	1.29167	0.584	0.09	7.46847e-126	HBC-2
Urah	3.91873e-130	0.824594	0.279	0.019	7.60313e-126	HBC-2
Rps14	3.94789e-130	0.711018	1	0.957	7.65971e-126	iOSN-1
Rpl7	4.25766e-130	0.834007	0.997	0.822	8.26071e-126	GBC-1
Otx2	5.7992e-130	0.694332	0.588	0.069	1.12516e-125	GBC-2
Rpl13	7.74664e-130	0.70723	0.996	0.926	1.503e-125	HBC-1
Mecom	8.52473e-130	0.589326	0.455	0.076	1.65397e-125	GBC-1
Fkbp1a	9.13429e-130	0.681094	0.846	0.496	1.77224e-125	iOSN-2
Ebf3	1.02855e-129	0.468772	0.701	0.436	1.99558e-125	mOSN-3
BC051077	1.43649e-129	0.492046	0.426	0.236	2.78708e-125	mOSN-1
Arhgdig	1.60513e-129	1.01139	0.842	0.263	3.11428e-125	iOSN-3
Rpl35a	1.90373e-129	0.764544	0.988	0.854	3.69361e-125	HBC-1
Rplp1	2.02389e-129	0.997305	0.991	0.888	3.92675e-125	HBC-4
Rps28	2.31522e-129	0.954532	1	0.839	4.492e-125	GBC-1
Ckap2l	2.98428e-129	0.244249	0.201	0.015	5.7901e-125	GBC-1
Rps8	3.51448e-129	1.00764	0.997	0.921	6.81879e-125	HBC-4
Fezf1	5.37016e-129	1.04293	0.648	0.184	1.04192e-124	iOSN-1
Bmpr2	5.6866e-129	0.495607	0.461	0.214	1.10331e-124	mOSN-3
Marcks	6.13502e-129	1.25639	0.97	0.342	1.19032e-124	GBC-4
Rpl39	6.21978e-129	1.14865	0.997	0.884	1.20676e-124	HBC-4
Selk	6.67886e-129	0.549249	0.98	0.83	1.29583e-124	iOSN-2
Ccp110	7.79965e-129	1.68433	0.976	0.282	1.51329e-124	GBC-2
Rpl18a	7.84568e-129	0.672885	0.995	0.942	1.52222e-124	GBC-3
Pdcd4	7.92844e-129	0.886208	0.508	0.133	1.53828e-124	HBC-1
Rps10	8.52973e-129	0.915313	0.98	0.726	1.65494e-124	GBC-1
Rnf183	8.55139e-129	0.436256	0.206	0.066	1.65914e-124	mOSN-1
Rabgap1l	9.0867e-129	0.485192	0.541	0.276	1.763e-124	mOSN-3
Rpl19	9.18057e-129	0.763953	0.994	0.888	1.78121e-124	GBC-1
Rpl28	1.13623e-128	0.780848	0.994	0.855	2.20452e-124	GBC-1
Ppp3ca	1.5153e-128	0.606017	0.625	0.38	2.93999e-124	mOSN-3
Mpp6	1.97734e-128	0.281023	0.257	0.026	3.83644e-124	GBC-1
Rcn1	2.01277e-128	0.307677	0.246	0.023	3.90518e-124	GBC-1
Eef1b2	2.06505e-128	0.95823	0.927	0.41	4.00661e-124	GBC-1
Fam213b	2.09917e-128	0.708583	0.979	0.719	4.07281e-124	iOSN-4
Serpine2	2.23074e-128	0.823186	0.971	0.711	4.32809e-124	iOSN-4
Rps18	2.51266e-128	1.50296	1	0.902	4.87506e-124	HBC-3
Ppp1r11	2.58161e-128	0.479896	0.495	0.319	5.00885e-124	mOSN-1
Gm9844	2.73793e-128	0.610368	0.31	0.07	5.31214e-124	iOSN-2
Rps19	2.91672e-128	0.698608	0.998	0.934	5.65901e-124	GBC-3
Faap20	3.09323e-128	0.391349	0.363	0.05	6.00149e-124	GBC-1
D130043K22Rik	3.38679e-128	0.396738	0.242	0.07	6.57104e-124	mOSN-3
Rplp0	3.67588e-128	0.903428	0.979	0.677	7.13194e-124	iOSN-1
Kcns3	5.71292e-128	0.45291	0.247	0.093	1.10842e-123	mOSN-1
Rnasel	6.0454e-128	0.612006	0.309	0.035	1.17293e-123	iOSN-3
Fam174a	6.07419e-128	0.438945	0.549	0.365	1.17851e-123	mOSN-1
Hist1h2bc	6.2689e-128	0.491964	0.575	0.403	1.21629e-123	mOSN-1
Rps27	7.34314e-128	1.02865	1	0.962	1.42472e-123	HBC-4
Stmn2	7.5484e-128	0.979142	0.977	0.628	1.46454e-123	iOSN-1
Rpl4	9.77152e-128	0.848565	0.992	0.788	1.89587e-123	GBC-1
Bex1	2.26934e-127	0.544891	0.439	0.072	4.40298e-123	GBC-1
Mmp14	2.66111e-127	0.308762	0.24	0.023	5.16309e-123	GBC-1
Rpl23	2.9067e-127	0.778466	0.997	0.914	5.63958e-123	GBC-1
Gk5	3.79656e-127	0.445785	0.361	0.14	7.36608e-123	mOSN-3
Pmf1	3.8478e-127	0.527721	0.43	0.039	7.46551e-123	GBC-2
Ubl3	4.58075e-127	0.46429	0.616	0.436	8.88757e-123	mOSN-1
Ranbp1	5.06871e-127	1.24618	0.905	0.506	9.8343e-123	GBC-1
Tes	6.39014e-127	0.621614	0.385	0.042	1.23982e-122	GBC-4
Rps29	7.88029e-127	0.969712	1	0.992	1.52893e-122	HBC-4
Ccdc28a	9.37318e-127	0.643006	0.286	0.06	1.81858e-122	iOSN-2
Incenp	1.00695e-126	0.327335	0.274	0.029	1.95368e-122	GBC-1
Snrpg	1.36715e-126	0.939539	0.947	0.491	2.65254e-122	GBC-1
Cdk2ap1	1.571e-126	0.388969	0.31	0.038	3.04805e-122	GBC-1
Hmga1	1.73298e-126	0.333548	0.268	0.028	3.36234e-122	GBC-1
Ankrd54	1.73963e-126	0.496251	0.34	0.169	3.37522e-122	mOSN-1
Tjp3	1.78084e-126	0.360316	0.304	0.036	3.45518e-122	GBC-1
Trp53	1.98408e-126	0.675252	0.582	0.07	3.84951e-122	GBC-2
Cldn23	2.05311e-126	0.501218	0.258	0.049	3.98344e-122	iOSN-2
Ebf2	2.8991e-126	0.381493	0.841	0.609	5.62483e-122	mOSN-3
Sfrp1	3.69451e-126	1.22857	0.492	0.063	7.16809e-122	HBC-2
Lmo1	4.18404e-126	0.707296	0.407	0.075	8.11787e-122	GBC-3
Mrpl41	4.18917e-126	0.480611	0.463	0.288	8.12782e-122	mOSN-1
Atp6v0b	5.41644e-126	0.39725	0.662	0.497	1.0509e-121	mOSN-1
Rps6	5.96185e-126	1.54985	1	0.849	1.15672e-121	HBC-3
Bach2	6.70861e-126	0.673407	0.338	0.043	1.30161e-121	iOSN-3
mt-Co1	8.36273e-126	0.498136	1	1	1.62254e-121	HBC-1
Rpl39	8.39837e-126	0.841589	0.997	0.883	1.62945e-121	GBC-1
Rpl13a	9.94644e-126	0.652733	0.992	0.929	1.92981e-121	HBC-1
Eef1a1	1.1507e-125	0.692215	0.994	0.864	2.23259e-121	HBC-1
Rbbp7	1.76243e-125	0.691961	0.687	0.167	3.41947e-121	GBC-1
Mcm7	1.77254e-125	0.466356	0.419	0.067	3.43909e-121	GBC-1
Rcor1	2.20277e-125	1.3631	0.621	0.153	4.27382e-121	iOSN-3
Slc6a6	2.22597e-125	1.62998	0.97	0.345	4.31883e-121	HBC-2
Ptov1	2.29452e-125	0.979903	0.795	0.326	4.45182e-121	GBC-3
Ptprf	2.54894e-125	0.825631	0.541	0.153	4.94546e-121	HBC-1
Zmynd8	2.76241e-125	1.19728	0.704	0.245	5.35962e-121	iOSN-1
Mrto4	3.09659e-125	0.534194	0.483	0.087	6.008e-121	GBC-1
Ina	3.33488e-125	0.883868	0.457	0.079	6.47034e-121	iOSN-3
Kat6a	3.54452e-125	0.492618	0.487	0.24	6.87707e-121	mOSN-3
Pdap1	4.17046e-125	1.13021	0.937	0.476	8.09153e-121	iOSN-3
Cep70	4.20458e-125	0.724265	0.57	0.069	8.15772e-121	GBC-2
Bcl11b	6.70912e-125	0.985129	0.798	0.308	1.3017e-120	GBC-3
Rabac1	8.22395e-125	0.434063	0.63	0.476	1.59561e-120	mOSN-1
2810004N23Rik	8.36975e-125	0.411274	0.416	0.065	1.6239e-120	GBC-1
Exosc8	9.38106e-125	0.519509	0.503	0.092	1.82011e-120	GBC-1
Dach1	1.0556e-124	0.435204	0.264	0.02	2.04808e-120	GBC-4
Rps19	1.26852e-124	1.42225	1	0.935	2.46118e-120	HBC-3
Atp6v1a	1.6967e-124	0.489386	0.564	0.304	3.29194e-120	mOSN-3
Sparc	1.77065e-124	0.746683	0.361	0.07	3.43541e-120	HBC-1
1500009L16Rik	1.9737e-124	0.815476	0.254	0.017	3.82938e-120	HBC-2
Dkk3	2.01993e-124	0.584471	0.23	0.02	3.91908e-120	HBC-4
Map4k4	3.13796e-124	0.860352	0.533	0.107	6.08828e-120	iOSN-3
Rpl23	3.17404e-124	0.966116	0.997	0.914	6.15826e-120	HBC-4
Fosl2	3.32495e-124	0.475412	0.208	0.016	6.45108e-120	HBC-4
Rbp1	3.38196e-124	0.702478	0.223	0.019	6.56169e-120	HBC-4
Six1	3.42993e-124	0.721737	0.648	0.086	6.65474e-120	GBC-2
Cnih2	3.58177e-124	0.970543	0.519	0.122	6.94935e-120	iOSN-1
Spock2	3.79964e-124	0.456238	0.431	0.188	7.37206e-120	mOSN-3
Gm27197	4.50539e-124	0.490846	0.224	0.023	8.74137e-120	GBC-3
Rpl13a	5.19208e-124	1.3307	1	0.93	1.00737e-119	HBC-3
Nrip1	5.99323e-124	0.62036	0.556	0.114	1.16281e-119	GBC-1
Smarca5	6.14788e-124	0.906158	0.874	0.403	1.19281e-119	GBC-3
Cyp39a1	6.57327e-124	0.411929	0.345	0.026	1.27535e-119	GBC-2
Ska2	6.58211e-124	0.624309	0.521	0.057	1.27706e-119	GBC-2
Apoe	7.17313e-124	2.35845	0.99	0.551	1.39173e-119	HBC-2
Sdc1	7.31384e-124	0.837195	0.382	0.041	1.41903e-119	HBC-3
Apobec3	8.18843e-124	0.717479	0.368	0.052	1.58872e-119	HBC-4
Ifitm1	8.47271e-124	0.7434	0.469	0.113	1.64387e-119	HBC-1
Rps25	9.58369e-124	0.703347	0.994	0.881	1.85943e-119	GBC-1
Mdm1	9.61689e-124	0.84477	0.623	0.109	1.86587e-119	GBC-4
Cyc1	9.65604e-124	0.46212	0.521	0.352	1.87347e-119	mOSN-1
Sult6b1	9.86519e-124	0.689087	0.442	0.055	1.91405e-119	GBC-4
Rps14	1.0125e-123	0.605711	0.995	0.957	1.96445e-119	GBC-3
Cebpg	1.06056e-123	0.717213	0.835	0.515	2.0577e-119	iOSN-2
BC051076	1.346e-123	0.388292	0.227	0.064	2.61151e-119	mOSN-3
Cnga4	1.34633e-123	0.407601	0.551	0.338	2.61215e-119	mOSN-1
Rpl18a	1.51489e-123	1.38157	1	0.943	2.93919e-119	HBC-3
Vdac2	1.60949e-123	0.43879	0.591	0.43	3.12274e-119	mOSN-1
Rps26	1.85245e-123	0.878582	0.983	0.781	3.59412e-119	GBC-1
Fmod	2.15015e-123	0.666407	0.203	0.01	4.17172e-119	HBC-2
Prps2	2.21505e-123	0.265085	0.229	0.021	4.29764e-119	GBC-1
Sgms1	2.32702e-123	0.519419	0.241	0.032	4.51489e-119	HBC-1
Lhx2	2.48859e-123	0.241074	0.807	0.541	4.82837e-119	mOSN-3
Nedd4	2.90166e-123	0.817724	0.807	0.239	5.62979e-119	GBC-1
Cxcr4	3.1127e-123	0.664945	0.348	0.057	6.03926e-119	GBC-3
Tpbg	3.21065e-123	0.293464	0.221	0.02	6.22931e-119	GBC-1
Dtna	3.39793e-123	0.448124	0.386	0.16	6.59266e-119	mOSN-3
Shtn1	3.83436e-123	0.77169	0.515	0.076	7.43943e-119	GBC-4
Adcy3	4.00228e-123	0.394588	0.798	0.516	7.76521e-119	mOSN-3
Eif1ax	4.08287e-123	0.745711	0.709	0.187	7.92159e-119	GBC-1
Fam178b	4.17688e-123	0.430159	0.21	0.071	8.10398e-119	mOSN-1
Nudcd2	4.42138e-123	0.604043	0.581	0.123	8.57836e-119	GBC-1
Ppp1r2	5.94426e-123	0.421593	0.604	0.436	1.15331e-118	mOSN-1
Rpl36a	6.47823e-123	1.11465	0.978	0.713	1.25691e-118	HBC-4
Aqp4	8.11876e-123	1.28319	0.594	0.096	1.5752e-118	HBC-2
Eif4a1	8.79128e-123	0.591791	0.901	0.576	1.70568e-118	iOSN-2
Eef1g	9.31883e-123	0.909145	0.944	0.467	1.80804e-118	GBC-1
Klc3	9.4909e-123	0.929548	0.645	0.194	1.84142e-118	GBC-3
Ctsl	9.58911e-123	1.44735	0.731	0.162	1.86048e-118	HBC-2
Smco4	1.06831e-122	0.340081	0.288	0.033	2.07274e-118	GBC-1
Clasp1	1.25927e-122	0.922736	0.688	0.136	2.44323e-118	GBC-4
Ypel3	1.35187e-122	0.720435	0.955	0.706	2.6229e-118	iOSN-4
Ybx1	1.42844e-122	0.942664	0.975	0.68	2.77146e-118	GBC-1
4921524J17Rik	1.468e-122	0.643614	0.461	0.148	2.84822e-118	iOSN-2
Anxa1	1.61823e-122	1.2273	0.567	0.096	3.13969e-118	HBC-3
Foxn3	1.81432e-122	0.48888	0.214	0.025	3.52015e-118	HBC-1
Ankrd6	1.88413e-122	0.47829	0.202	0.022	3.6556e-118	HBC-1
Rpl14	2.14922e-122	1.36852	1	0.882	4.16991e-118	HBC-3
Rplp1	2.23541e-122	0.744932	0.997	0.888	4.33714e-118	GBC-1
Cxcl12	2.32083e-122	0.895406	0.31	0.025	4.50288e-118	HBC-2
Six3	2.76304e-122	0.391651	0.397	0.061	5.36086e-118	GBC-1
Timp3	2.9149e-122	0.959002	0.406	0.064	5.65548e-118	HBC-4
Btf3	2.9421e-122	0.836529	0.98	0.671	5.70825e-118	GBC-1
Sorbs2	2.98845e-122	0.4634	0.34	0.132	5.7982e-118	mOSN-3
Rps14	3.5708e-122	0.735957	1	0.957	6.92807e-118	GBC-1
Fbl	3.6536e-122	0.765633	0.712	0.188	7.08871e-118	GBC-1
Sfn	4.26221e-122	0.812888	0.349	0.047	8.26955e-118	HBC-4
Rplp2	4.3692e-122	1.01546	0.984	0.88	8.47712e-118	HBC-4
Rps12	4.80853e-122	1.18226	0.981	0.694	9.32951e-118	HBC-4
Mettl7a1	5.04813e-122	1.42229	0.67	0.13	9.79437e-118	HBC-2
Apoo	5.29106e-122	0.429405	0.377	0.056	1.02657e-117	GBC-1
Anp32b	5.49626e-122	1.02416	0.883	0.388	1.06638e-117	GBC-1
Rps16	5.66523e-122	1.39591	1	0.848	1.09917e-117	HBC-3
Zfp36l1	7.46261e-122	0.517394	0.573	0.116	1.4479e-117	GBC-1
Chga	8.03374e-122	0.638607	0.993	0.747	1.55871e-117	mOSN-4
Map3k1	9.14725e-122	0.534754	0.252	0.024	1.77475e-117	HBC-4
Abracl	9.36856e-122	0.799702	0.636	0.087	1.81769e-117	GBC-2
Prdx1	1.0243e-121	0.305622	0.856	0.752	1.98735e-117	mOSN-1
Elavl2	1.06397e-121	1.14773	0.842	0.161	2.06432e-117	GBC-2
Pabpc1	1.08763e-121	0.958049	0.925	0.438	2.11023e-117	GBC-1
Krt18	1.15123e-121	1.39278	0.802	0.215	2.23362e-117	HBC-3
Rplp0	1.15292e-121	1.75021	0.991	0.681	2.2369e-117	HBC-3
Hist2h2be	1.24903e-121	0.426083	0.708	0.541	2.42337e-117	mOSN-1
Tubb3	1.27272e-121	0.968193	0.977	0.635	2.46933e-117	iOSN-1
Pim3	1.8141e-121	0.898451	0.784	0.168	3.51971e-117	GBC-4
Tnrc6b	1.84014e-121	0.486388	0.494	0.249	3.57025e-117	mOSN-3
Hn1l	1.84331e-121	0.317296	0.263	0.028	3.57639e-117	GBC-1
Klhl5	1.89041e-121	0.451974	0.672	0.402	3.66778e-117	mOSN-3
Rhoc	2.09136e-121	0.57601	0.312	0.052	4.05766e-117	HBC-1
Tmed10	2.82605e-121	0.378194	0.702	0.558	5.48311e-117	mOSN-1
Gm10282	3.14497e-121	0.458007	0.333	0.025	6.10187e-117	GBC-2
Rdx	3.80393e-121	0.742768	0.437	0.104	7.38038e-117	HBC-1
Hnrnpab	4.24415e-121	0.856347	0.845	0.339	8.23451e-117	GBC-3
Psmg4	4.37017e-121	0.551948	0.528	0.104	8.479e-117	GBC-1
Elavl2	4.66348e-121	1.05893	0.727	0.16	9.04809e-117	GBC-4
Tuba1a	6.08212e-121	0.797854	0.997	0.904	1.18005e-116	iOSN-1
Cby1	6.22001e-121	0.673431	0.71	0.331	1.20681e-116	iOSN-2
Rpl24	7.3949e-121	0.747315	0.994	0.899	1.43476e-116	GBC-1
Csrp2	8.66382e-121	0.55686	0.564	0.116	1.68095e-116	GBC-1
Sec11a	8.69142e-121	0.698484	0.613	0.258	1.68631e-116	iOSN-2
Col17a1	1.00477e-120	0.910589	0.36	0.035	1.94945e-116	HBC-2
Six2	1.12361e-120	0.472754	0.202	0.023	2.18003e-116	HBC-1
Rpl15	1.24138e-120	0.888106	0.975	0.646	2.40852e-116	GBC-1
Hadh	1.24894e-120	0.382422	0.318	0.041	2.4232e-116	GBC-1
Magi3	1.38536e-120	0.788906	0.476	0.086	2.68788e-116	iOSN-3
Carhsp1	1.512e-120	0.755016	0.594	0.077	2.93358e-116	GBC-2
Unc13c	1.55496e-120	0.445599	0.299	0.106	3.01694e-116	mOSN-3
Etnk1	2.69587e-120	0.438421	0.38	0.159	5.23053e-116	mOSN-3
Nras	3.07594e-120	1.04261	0.754	0.226	5.96794e-116	iOSN-3
Elmod1	3.25684e-120	0.40437	0.259	0.082	6.31892e-116	mOSN-3
Tubb2a	3.36136e-120	0.579301	0.312	0.074	6.5217e-116	iOSN-2
Gm10076	3.72093e-120	0.343933	0.92	0.736	7.21935e-116	mOSN-3
Sat1	4.30063e-120	1.05377	0.563	0.126	8.34409e-116	HBC-4
Psmb7	5.19516e-120	0.417643	0.64	0.488	1.00797e-115	mOSN-1
Rpl32	5.87109e-120	1.25856	1	0.932	1.13911e-115	HBC-3
Rpl29	5.87994e-120	0.599572	0.922	0.632	1.14083e-115	iOSN-2
Ifitm2	6.03226e-120	1.48124	0.863	0.243	1.17038e-115	HBC-2
Hspe1	6.08626e-120	0.91922	0.911	0.419	1.18086e-115	GBC-1
Kcnc4	6.56295e-120	0.393466	0.555	0.347	1.27334e-115	mOSN-1
Rps8	7.23726e-120	0.639957	1	0.92	1.40417e-115	HBC-1
Gpx2	8.90476e-120	0.567111	0.394	0.035	1.7277e-115	GBC-2
Hunk	1.06067e-119	0.56763	0.325	0.032	2.05792e-115	GBC-4
Necab2	1.37828e-119	0.557347	0.274	0.057	2.67414e-115	iOSN-2
Mtf2	1.41679e-119	0.858502	0.567	0.152	2.74885e-115	GBC-3
Rpl23a	1.51431e-119	0.854392	0.992	0.814	2.93807e-115	GBC-1
2700094K13Rik	2.1512e-119	1.19925	0.855	0.186	4.17375e-115	GBC-2
Rpl9	2.56566e-119	0.73284	0.989	0.886	4.97789e-115	GBC-1
Ebf1	2.58229e-119	1.01344	0.991	0.835	5.01017e-115	iOSN-3
Cfl1	2.63932e-119	0.846699	0.96	0.603	5.1208e-115	GBC-3
Rps24	2.66486e-119	0.734847	0.982	0.893	5.17036e-115	HBC-1
Hcfc1r1	2.83109e-119	1.05467	0.866	0.439	5.49288e-115	iOSN-1
Pard3b	2.88357e-119	0.607196	0.416	0.051	5.5947e-115	GBC-4
Tubb2b	3.2013e-119	1.03599	0.899	0.338	6.21117e-115	iOSN-3
Rufy2	3.76517e-119	0.462262	0.419	0.19	7.30519e-115	mOSN-3
Dync2h1	3.91303e-119	0.427804	0.418	0.185	7.59206e-115	mOSN-3
Dbi	4.96033e-119	0.825543	0.76	0.228	9.62402e-115	GBC-1
Mettl7a1	5.87772e-119	1.19152	0.659	0.13	1.14039e-114	HBC-3
Mab21l1	7.9091e-119	0.644946	0.377	0.043	1.53452e-114	GBC-4
Erich3	8.08538e-119	0.473522	0.434	0.199	1.56873e-114	mOSN-3
Sv2c	8.10085e-119	0.389278	0.24	0.072	1.57173e-114	mOSN-3
Acsl6	8.14116e-119	0.403981	0.585	0.388	1.57955e-114	mOSN-1
2010111I01Rik	8.52867e-119	1.02676	0.438	0.058	1.65473e-114	HBC-3
Rpl37	9.83045e-119	0.788934	0.997	0.921	1.9073e-114	GBC-1
Ccdc3	1.01197e-118	0.574259	0.286	0.045	1.96341e-114	HBC-1
Lsm5	1.12259e-118	0.877018	0.81	0.271	2.17805e-114	GBC-1
[truncated: 10,703 more rows]

## Sheet: pseudotime DEGs
DEGs enriched in cells following the monocle pseudotime trajectory
Gene symbol	status	family	pval	qval	Group	num_cells_expressed
Aqp3	OK	negbinomial.size	0	0	1	1088
Cbr2	OK	negbinomial.size	0	0	1	2976
Ccnd2	OK	negbinomial.size	0	0	1	549
Cyp2f2	OK	negbinomial.size	0	0	1	1583
Dapl1	OK	negbinomial.size	0	0	1	750
Epas1	OK	negbinomial.size	0	0	1	1145
F3	OK	negbinomial.size	0	0	1	714
Fxyd3	OK	negbinomial.size	0	0	1	748
Gstm1	OK	negbinomial.size	0	0	1	2558
Ifitm3	OK	negbinomial.size	0	0	1	1177
Igfbp2	OK	negbinomial.size	0	0	1	600
Krt14	OK	negbinomial.size	0	0	1	660
Krt17	OK	negbinomial.size	0	0	1	557
Krt5	OK	negbinomial.size	0	0	1	650
Prdx6	OK	negbinomial.size	0	0	1	2079
S100a11	OK	negbinomial.size	0	0	1	1290
Slc6a6	OK	negbinomial.size	0	0	1	2253
Trp63	OK	negbinomial.size	0	0	1	611
Efemp1	OK	negbinomial.size	0	2.2744e-306	1	429
Ces1d	OK	negbinomial.size	5.84121e-307	1.07297e-304	1	1037
Aldh2	OK	negbinomial.size	2.60543e-305	4.72208e-303	1	1537
Gsto1	OK	negbinomial.size	8.28027e-303	1.46174e-300	1	549
Wfdc2	OK	negbinomial.size	3.66767e-302	6.31072e-300	1	1074
Krt18	OK	negbinomial.size	4.98704e-301	8.36899e-299	1	1536
Wls	OK	negbinomial.size	5.86148e-298	9.59942e-296	1	983
Sfrp1	OK	negbinomial.size	4.23074e-297	6.84624e-295	1	549
Tmem176b	OK	negbinomial.size	1.18896e-286	1.85765e-284	1	936
Car12	OK	negbinomial.size	4.78135e-285	7.38556e-283	1	449
Adh7	OK	negbinomial.size	4.11689e-283	6.28775e-281	1	313
Ifitm1	OK	negbinomial.size	2.88374e-275	4.26073e-273	1	800
S100a6	OK	negbinomial.size	3.49278e-272	5.05078e-270	1	1280
Aqp4	OK	negbinomial.size	5.2424e-267	7.34639e-265	1	740
Net1	OK	negbinomial.size	4.7186e-264	6.41399e-262	1	598
Perp	OK	negbinomial.size	7.22567e-264	9.7246e-262	1	574
Tmem176a	OK	negbinomial.size	7.70358e-264	1.02662e-261	1	696
Hspb1	OK	negbinomial.size	2.1913e-261	2.81003e-259	1	745
Hpgd	OK	negbinomial.size	3.67988e-259	4.63154e-257	1	497
Ahnak	OK	negbinomial.size	2.14449e-258	2.65e-256	1	524
Krt19	OK	negbinomial.size	2.48122e-258	3.03849e-256	1	444
Phlda3	OK	negbinomial.size	4.324e-258	5.24787e-256	1	358
Zfp36l1	OK	negbinomial.size	1.49499e-257	1.78258e-255	1	900
Amotl1	OK	negbinomial.size	4.30006e-248	4.8709e-246	1	578
Bcam	OK	negbinomial.size	8.02812e-246	9.0187e-244	1	490
4631405K08Rik	OK	negbinomial.size	2.07613e-242	2.29437e-240	1	452
Lypd2	OK	negbinomial.size	3.33618e-242	3.65715e-240	1	851
Mettl7a1	OK	negbinomial.size	2.48141e-238	2.67697e-236	1	982
Ccdc3	OK	negbinomial.size	1.57217e-237	1.66957e-235	1	333
Sult1e1	OK	negbinomial.size	5.82766e-235	6.09349e-233	1	574
Gsta4	OK	negbinomial.size	8.0988e-234	8.40358e-232	1	768
Crim1	OK	negbinomial.size	4.0988e-233	4.18909e-231	1	603
Aldh3a1	OK	negbinomial.size	1.27383e-227	1.2457e-225	1	370
Hes1	OK	negbinomial.size	2.20841e-227	2.11401e-225	1	628
Csrp1	OK	negbinomial.size	9.24306e-224	8.66489e-222	1	479
Vamp8	OK	negbinomial.size	4.20515e-222	3.83628e-220	1	878
Vit	OK	negbinomial.size	2.54665e-221	2.30778e-219	1	358
Igfbp5	OK	negbinomial.size	1.88282e-219	1.67275e-217	1	853
Fmo2	OK	negbinomial.size	5.35654e-219	4.6674e-217	1	492
Runx1	OK	negbinomial.size	2.49204e-216	2.14395e-214	1	646
Wnt4	OK	negbinomial.size	1.11101e-214	9.38012e-213	1	436
Cdo1	OK	negbinomial.size	2.17783e-214	1.81615e-212	1	469
Anxa2	OK	negbinomial.size	5.02103e-214	4.16164e-212	1	622
Aqp5	OK	negbinomial.size	3.87228e-213	3.17083e-211	1	650
Nedd4	OK	negbinomial.size	9.23067e-211	7.33757e-209	1	1549
Eya1	OK	negbinomial.size	1.18501e-210	9.365e-209	1	736
Clu	OK	negbinomial.size	1.44045e-210	1.13179e-208	1	937
Mecom	OK	negbinomial.size	8.8675e-210	6.92735e-208	1	593
Lamb3	OK	negbinomial.size	1.70217e-208	1.29261e-206	1	382
Scd2	OK	negbinomial.size	3.00507e-208	2.26933e-206	1	1114
Slc26a7	OK	negbinomial.size	4.47954e-204	3.29137e-202	1	495
Fmo6	OK	negbinomial.size	3.04662e-199	2.13468e-197	1	384
Nrcam	OK	negbinomial.size	2.36319e-196	1.62236e-194	1	317
Cd63	OK	negbinomial.size	1.8869e-194	1.26348e-192	1	1033
Abca4	OK	negbinomial.size	1.65718e-188	1.05756e-186	1	258
Ece1	OK	negbinomial.size	4.34998e-186	2.7502e-184	1	1659
Sdc4	OK	negbinomial.size	1.48556e-184	9.30563e-183	1	706
Col17a1	OK	negbinomial.size	8.55894e-184	5.31241e-182	1	290
Abi3bp	OK	negbinomial.size	5.04118e-182	3.04554e-180	1	240
Krt15	OK	negbinomial.size	2.20342e-181	1.31943e-179	1	183
Pdpn	OK	negbinomial.size	2.46393e-180	1.45618e-178	1	364
Six3	OK	negbinomial.size	9.6683e-179	5.61629e-177	1	477
Kitl	OK	negbinomial.size	8.59392e-178	4.88775e-176	1	400
Dsp	OK	negbinomial.size	7.5174e-176	4.22248e-174	1	654
Pltp	OK	negbinomial.size	2.64534e-175	1.4737e-173	1	366
Crlf1	OK	negbinomial.size	1.64705e-174	9.06409e-173	1	414
Per3	OK	negbinomial.size	1.03113e-173	5.60644e-172	1	449
Rplp0	OK	negbinomial.size	7.43597e-170	3.94833e-168	1	3683
Sox2	OK	negbinomial.size	3.9904e-167	2.07822e-165	1	606
Pdgfa	OK	negbinomial.size	7.82627e-167	4.04496e-165	1	722
Slc15a2	OK	negbinomial.size	1.25394e-162	6.19812e-161	1	482
Cald1	OK	negbinomial.size	7.53777e-161	3.63337e-159	1	402
Pik3r1	OK	negbinomial.size	9.77986e-161	4.69744e-159	1	641
Ctsl	OK	negbinomial.size	6.39156e-160	3.03778e-158	1	1092
Apoc1	OK	negbinomial.size	9.3502e-160	4.42848e-158	1	390
Fam101b	OK	negbinomial.size	1.63507e-159	7.69049e-158	1	592
Oat	OK	negbinomial.size	1.78063e-158	8.26079e-157	1	502
Sema5a	OK	negbinomial.size	3.54927e-158	1.63543e-156	1	274
Slc23a2	OK	negbinomial.size	8.8148e-158	4.03433e-156	1	583
Ldha	OK	negbinomial.size	1.8594e-157	8.45312e-156	1	695
Timp3	OK	negbinomial.size	1.51686e-156	6.85008e-155	1	535
Ptprf	OK	negbinomial.size	4.12633e-156	1.85113e-154	1	1086
Sema3d	OK	negbinomial.size	2.19831e-155	9.8295e-154	1	246
S100a16	OK	negbinomial.size	1.20309e-154	5.32689e-153	1	394
Dsc3	OK	negbinomial.size	2.51147e-152	1.09068e-150	1	320
Fgfbp1	OK	negbinomial.size	2.54152e-152	1.10022e-150	1	259
Tns3	OK	negbinomial.size	7.0295e-152	3.01426e-150	1	481
Nfib	OK	negbinomial.size	1.07746e-151	4.60562e-150	1	2274
Sdc1	OK	negbinomial.size	2.25047e-151	9.55958e-150	1	307
Rdx	OK	negbinomial.size	4.68422e-151	1.98357e-149	1	670
Itgb4	OK	negbinomial.size	5.68914e-148	2.34341e-146	1	271
Igfbp4	OK	negbinomial.size	2.50306e-147	1.02482e-145	1	390
S100a10	OK	negbinomial.size	8.25043e-147	3.36781e-145	1	509
Snai2	OK	negbinomial.size	1.72651e-146	7.00551e-145	1	247
Meis2	OK	negbinomial.size	1.62916e-145	6.55182e-144	1	442
Laptm4a	OK	negbinomial.size	1.71453e-145	6.87481e-144	1	1890
Pbx1	OK	negbinomial.size	4.98766e-144	1.97085e-142	1	1468
Gsta3	OK	negbinomial.size	1.14403e-143	4.50749e-142	1	459
Il6st	OK	negbinomial.size	2.12788e-143	8.33553e-142	1	1000
Tns1	OK	negbinomial.size	7.22499e-143	2.82211e-141	1	280
Six1	OK	negbinomial.size	7.36762e-143	2.86957e-141	1	547
Slc47a1	OK	negbinomial.size	1.25557e-140	4.80758e-139	1	254
Tgm2	OK	negbinomial.size	1.05982e-139	4.02407e-138	1	204
Tsc22d3	OK	negbinomial.size	5.86731e-138	2.20316e-136	1	556
Sulf1	OK	negbinomial.size	9.00647e-137	3.35411e-135	1	247
Ccl20	OK	negbinomial.size	4.75144e-136	1.75506e-134	1	166
Ltbp4	OK	negbinomial.size	2.08361e-134	7.59316e-133	1	312
Hlf	OK	negbinomial.size	1.46653e-133	5.30174e-132	1	394
Pdcd4	OK	negbinomial.size	3.0922e-130	1.09175e-128	1	779
Trim29	OK	negbinomial.size	4.49562e-129	1.57497e-127	1	246
Upk1b	OK	negbinomial.size	1.13894e-127	3.94939e-126	1	212
Col23a1	OK	negbinomial.size	2.12953e-127	7.32827e-126	1	229
Dcn	OK	negbinomial.size	3.21015e-127	1.09913e-125	1	510
Plpp3	OK	negbinomial.size	5.05135e-127	1.71658e-125	1	319
H2-D1	OK	negbinomial.size	3.54094e-126	1.19731e-124	1	879
Dst	OK	negbinomial.size	5.86948e-125	1.96997e-123	1	1609
Otx2	OK	negbinomial.size	2.48169e-124	8.26805e-123	1	516
Rhoc	OK	negbinomial.size	8.03141e-123	2.64336e-121	1	451
Dbp	OK	negbinomial.size	6.49432e-122	2.12716e-120	1	467
Id1	OK	negbinomial.size	2.17985e-121	7.05492e-120	1	621
Sypl	OK	negbinomial.size	5.34232e-120	1.70465e-118	1	923
Dlk2	OK	negbinomial.size	1.62769e-119	5.15739e-118	1	179
Fat2	OK	negbinomial.size	1.2904e-118	4.01381e-117	1	233
Ogn	OK	negbinomial.size	6.29257e-118	1.93957e-116	1	222
Defb1	OK	negbinomial.size	2.49882e-117	7.63291e-116	1	190
Gja1	OK	negbinomial.size	3.5451e-117	1.08046e-115	1	264
H2-K1	OK	negbinomial.size	6.05861e-117	1.84239e-115	1	732
Gpm6b	OK	negbinomial.size	5.5244e-116	1.65403e-114	1	839
Reep5	OK	negbinomial.size	2.86944e-113	8.3521e-112	1	593
Pax6	OK	negbinomial.size	3.67806e-113	1.06829e-111	1	442
Itgb1	OK	negbinomial.size	7.55105e-112	2.17001e-110	1	795
Anxa1	OK	negbinomial.size	1.05694e-111	3.02462e-110	1	523
Mif	OK	negbinomial.size	1.54573e-111	4.41409e-110	1	1489
Dcxr	OK	negbinomial.size	1.46588e-110	4.13396e-109	1	558
Plec	OK	negbinomial.size	1.76193e-110	4.95857e-109	1	318
Eef1g	OK	negbinomial.size	2.53714e-109	7.0816e-108	1	2576
Gclc	OK	negbinomial.size	3.42009e-109	9.48762e-108	1	871
Arpc1b	OK	negbinomial.size	7.22546e-109	1.98817e-107	1	644
Rps2	OK	negbinomial.size	1.97221e-108	5.40489e-107	1	3361
Ermn	OK	negbinomial.size	3.10969e-108	8.50503e-107	1	476
Slc39a10	OK	negbinomial.size	3.67161e-108	1.00017e-106	1	497
Rbms3	OK	negbinomial.size	4.25242e-108	1.15376e-106	1	353
G0s2	OK	negbinomial.size	1.78788e-107	4.80291e-106	1	314
Sat1	OK	negbinomial.size	2.43235e-107	6.52128e-106	1	743
Sparc	OK	negbinomial.size	4.54959e-107	1.21023e-105	1	598
Gnai2	OK	negbinomial.size	1.25375e-106	3.31561e-105	1	576
Sfn	OK	negbinomial.size	1.49707e-106	3.95138e-105	1	342
Pitx1	OK	negbinomial.size	1.89783e-106	4.99946e-105	1	408
Fam126a	OK	negbinomial.size	2.69358e-105	6.98738e-104	1	403
Slc29a1	OK	negbinomial.size	3.70895e-105	9.60301e-104	1	266
Ackr3	OK	negbinomial.size	1.00133e-104	2.57786e-103	1	235
Itpr1	OK	negbinomial.size	3.94681e-103	9.93499e-102	1	344
Rps16	OK	negbinomial.size	4.31453e-103	1.08405e-101	1	4568
Vegfa	OK	negbinomial.size	1.32104e-101	3.26114e-100	1	277
Stxbp6	OK	negbinomial.size	3.53438e-101	8.7034e-100	1	340
Apobec3	OK	negbinomial.size	4.77294e-101	1.17109e-99	1	356
Pcdh7	OK	negbinomial.size	2.29484e-99	5.53733e-98	1	1169
Rps27rt	OK	negbinomial.size	4.7341e-99	1.13895e-97	1	1212
Tacstd2	OK	negbinomial.size	6.16852e-99	1.48143e-97	1	242
Gas6	OK	negbinomial.size	7.8977e-98	1.85412e-96	1	536
Gm10073	OK	negbinomial.size	2.73747e-97	6.38257e-96	1	1644
Fads1	OK	negbinomial.size	3.93046e-97	9.14841e-96	1	367
Dmrta2	OK	negbinomial.size	5.43005e-97	1.25957e-95	1	451
B2m	OK	negbinomial.size	2.87008e-96	6.61236e-95	1	1220
Tns4	OK	negbinomial.size	4.69278e-96	1.07934e-94	1	190
Ephx1	OK	negbinomial.size	8.76551e-96	2.00927e-94	1	470
Luzp1	OK	negbinomial.size	1.03748e-94	2.33872e-93	1	281
Lgals3	OK	negbinomial.size	1.11638e-94	2.51241e-93	1	344
Atp1b3	OK	negbinomial.size	1.67712e-94	3.7619e-93	1	731
Cnn2	OK	negbinomial.size	5.47187e-94	1.21535e-92	1	347
Ly6a	OK	negbinomial.size	7.54283e-94	1.66715e-92	1	167
Rpl13	OK	negbinomial.size	6.73235e-93	1.47364e-91	1	4992
Foxa1	OK	negbinomial.size	6.91885e-93	1.51202e-91	1	190
2900026A02Rik	OK	negbinomial.size	1.01512e-92	2.20775e-91	1	288
Emp2	OK	negbinomial.size	2.11856e-92	4.5856e-91	1	197
Gng5	OK	negbinomial.size	2.24467e-92	4.85084e-91	1	1556
Rpl10a	OK	negbinomial.size	3.25387e-92	7.0206e-91	1	3902
Rps19	OK	negbinomial.size	7.83372e-92	1.67956e-90	1	4976
Zfp467	OK	negbinomial.size	1.27577e-91	2.72237e-90	1	494
Tcf7l2	OK	negbinomial.size	1.52515e-91	3.24943e-90	1	297
Pla2r1	OK	negbinomial.size	1.6982e-91	3.61246e-90	1	337
Aldh6a1	OK	negbinomial.size	2.24225e-91	4.7475e-90	1	309
Fgfr1	OK	negbinomial.size	5.98259e-91	1.2608e-89	1	339
Fmo3	OK	negbinomial.size	8.76331e-91	1.84396e-89	1	114
Hif1a	OK	negbinomial.size	1.10833e-90	2.31421e-89	1	1014
Pabpc1	OK	negbinomial.size	3.31423e-90	6.87791e-89	1	2399
Adam28	OK	negbinomial.size	3.73321e-90	7.7356e-89	1	870
Serpina3n	OK	negbinomial.size	6.535e-90	1.35206e-88	1	141
Fat1	OK	negbinomial.size	1.5402e-89	3.16731e-88	1	666
Junb	OK	negbinomial.size	1.91064e-89	3.91135e-88	1	735
Zfhx3	OK	negbinomial.size	1.98096e-89	4.04919e-88	1	1237
Kcnh1	OK	negbinomial.size	5.17949e-89	1.04925e-87	1	172
Notch1	OK	negbinomial.size	5.74725e-89	1.16254e-87	1	300
Gm16136	OK	negbinomial.size	1.3933e-88	2.80995e-87	1	325
Rpl18	OK	negbinomial.size	1.42335e-88	2.86632e-87	1	4039
Fgf1	OK	negbinomial.size	1.97071e-88	3.95685e-87	1	208
Smarca2	OK	negbinomial.size	2.37631e-88	4.75718e-87	1	721
Lmo4	OK	negbinomial.size	4.2303e-88	8.43144e-87	1	999
Rps6	OK	negbinomial.size	5.10118e-88	1.01523e-86	1	4524
F2r	OK	negbinomial.size	1.48902e-87	2.95048e-86	1	377
Eef1b2	OK	negbinomial.size	2.33893e-87	4.62109e-86	1	2345
Rpl17	OK	negbinomial.size	7.52181e-86	1.44821e-84	1	4385
Rgs12	OK	negbinomial.size	5.22025e-85	9.93821e-84	1	543
Gpr155	OK	negbinomial.size	5.38377e-85	1.02352e-83	1	579
Nr3c1	OK	negbinomial.size	1.09936e-84	2.08127e-83	1	604
Gnb2l1	OK	negbinomial.size	3.1071e-84	5.87411e-83	1	2822
Ssfa2	OK	negbinomial.size	4.91222e-84	9.23537e-83	1	304
Ndrg2	OK	negbinomial.size	9.14761e-84	1.70802e-82	1	413
Abracl	OK	negbinomial.size	5.36082e-83	9.84725e-82	1	509
Cers4	OK	negbinomial.size	6.72962e-83	1.23449e-81	1	350
Anxa3	OK	negbinomial.size	2.91178e-82	5.29142e-81	1	220
Sox4	OK	negbinomial.size	3.04136e-82	5.51951e-81	1	904
Cdcp1	OK	negbinomial.size	5.56122e-82	1.00524e-80	1	256
Dkk3	OK	negbinomial.size	1.24955e-81	2.24078e-80	1	171
Rps5	OK	negbinomial.size	1.9728e-81	3.52846e-80	1	4650
Acsl3	OK	negbinomial.size	2.52212e-81	4.4932e-80	1	674
Tpm4	OK	negbinomial.size	6.68341e-81	1.17984e-79	1	558
Isl1	OK	negbinomial.size	1.19964e-80	2.10409e-79	1	220
Antxr1	OK	negbinomial.size	1.48602e-80	2.60302e-79	1	237
Txnip	OK	negbinomial.size	1.92706e-80	3.36691e-79	1	705
Cd164	OK	negbinomial.size	8.58067e-80	1.48017e-78	1	1058
Urah	OK	negbinomial.size	1.18474e-79	2.03592e-78	1	156
Eef1d	OK	negbinomial.size	1.34665e-79	2.30832e-78	1	1774
Tagln2	OK	negbinomial.size	1.61704e-79	2.76483e-78	1	477
Rps4x	OK	negbinomial.size	1.86098e-79	3.17393e-78	1	4561
Ptpn14	OK	negbinomial.size	3.32047e-79	5.64895e-78	1	187
Myo10	OK	negbinomial.size	6.62071e-79	1.12074e-77	1	224
Mgat3	OK	negbinomial.size	7.7396e-79	1.30851e-77	1	305
Cdv3	OK	negbinomial.size	1.55829e-78	2.63128e-77	1	906
Nr1d1	OK	negbinomial.size	2.35647e-78	3.96429e-77	1	236
Rps18	OK	negbinomial.size	3.74382e-78	6.27493e-77	1	4759
Arhgef26	OK	negbinomial.size	3.99956e-78	6.69532e-77	1	210
Serpinh1	OK	negbinomial.size	4.86568e-78	8.1352e-77	1	257
Foxg1	OK	negbinomial.size	5.28911e-78	8.83229e-77	1	328
Cxcl12	OK	negbinomial.size	1.11683e-77	1.86043e-76	1	203
Anxa8	OK	negbinomial.size	1.26032e-77	2.09176e-76	1	124
Cachd1	OK	negbinomial.size	6.73556e-76	1.09517e-74	1	220
Hey1	OK	negbinomial.size	8.47308e-76	1.37276e-74	1	390
Gstp1	OK	negbinomial.size	1.00225e-75	1.62185e-74	1	428
Fras1	OK	negbinomial.size	1.34564e-75	2.16465e-74	1	220
Fermt1	OK	negbinomial.size	1.85036e-75	2.96603e-74	1	134
Slc25a37	OK	negbinomial.size	2.98311e-75	4.77614e-74	1	673
Ptk7	OK	negbinomial.size	5.16909e-75	8.23721e-74	1	239
Adh1	OK	negbinomial.size	5.40251e-75	8.5991e-74	1	168
Nr2e1	OK	negbinomial.size	7.5209e-75	1.19569e-73	1	179
S100a14	OK	negbinomial.size	8.24538e-75	1.30934e-73	1	161
Tinagl1	OK	negbinomial.size	9.57383e-75	1.51852e-73	1	202
Cep170b	OK	negbinomial.size	9.43639e-74	1.47946e-72	1	904
Ttc3	OK	negbinomial.size	9.89271e-74	1.54921e-72	1	1416
Hmgcs1	OK	negbinomial.size	5.77735e-73	8.94436e-72	1	862
Car10	OK	negbinomial.size	9.82262e-73	1.51211e-71	1	108
1500009L16Rik	OK	negbinomial.size	2.45083e-72	3.74315e-71	1	144
Fam107a	OK	negbinomial.size	3.12451e-72	4.76671e-71	1	297
Vamp5	OK	negbinomial.size	4.11774e-72	6.27494e-71	1	260
Heg1	OK	negbinomial.size	4.47015e-72	6.79673e-71	1	904
Tax1bp3	OK	negbinomial.size	8.58785e-72	1.29705e-70	1	391
Prss23	OK	negbinomial.size	1.01944e-71	1.53628e-70	1	167
Rbm47	OK	negbinomial.size	1.55395e-71	2.3366e-70	1	358
Rpl6	OK	negbinomial.size	5.93337e-71	8.84345e-70	1	4256
Gm8730	OK	negbinomial.size	9.17347e-71	1.3613e-69	1	676
Ptprz1	OK	negbinomial.size	1.39423e-70	2.06222e-69	1	308
Mpzl2	OK	negbinomial.size	5.29903e-70	7.72023e-69	1	161
Tnfaip8	OK	negbinomial.size	6.50069e-70	9.45068e-69	1	257
Myl12a	OK	negbinomial.size	9.50397e-70	1.37726e-68	1	1722
Egfr	OK	negbinomial.size	9.73394e-70	1.40824e-68	1	175
Itgb5	OK	negbinomial.size	1.07585e-69	1.55409e-68	1	210
Thbs1	OK	negbinomial.size	1.97557e-69	2.84469e-68	1	246
Fjx1	OK	negbinomial.size	3.7443e-69	5.38016e-68	1	124
Oplah	OK	negbinomial.size	1.01697e-68	1.45207e-67	1	201
Col7a1	OK	negbinomial.size	1.52774e-68	2.17223e-67	1	198
Sap30	OK	negbinomial.size	2.58978e-68	3.67846e-67	1	906
Gpx8	OK	negbinomial.size	4.50265e-68	6.38212e-67	1	219
Rpl13a	OK	negbinomial.size	5.13223e-68	7.26692e-67	1	5066
Rpl11	OK	negbinomial.size	4.08449e-67	5.67694e-66	1	4673
Npm1	OK	negbinomial.size	8.176e-67	1.12714e-65	1	2974
Gm10116	OK	negbinomial.size	8.74845e-67	1.20119e-65	1	957
H2afj	OK	negbinomial.size	1.02947e-66	1.41064e-65	1	1536
Flna	OK	negbinomial.size	3.66441e-66	4.97109e-65	1	491
Ptpru	OK	negbinomial.size	3.74019e-66	5.06883e-65	1	171
Rrbp1	OK	negbinomial.size	8.70338e-66	1.1725e-64	1	816
Ugt2a1	OK	negbinomial.size	9.05044e-66	1.21805e-64	1	234
Meis1	OK	negbinomial.size	1.65004e-65	2.21412e-64	1	446
Rps7	OK	negbinomial.size	1.75555e-65	2.35338e-64	1	4413
Zfp36l2	OK	negbinomial.size	1.86663e-65	2.49981e-64	1	495
Lpp	OK	negbinomial.size	2.65384e-65	3.54707e-64	1	326
Npm3	OK	negbinomial.size	3.65839e-65	4.88012e-64	1	590
Phgdh	OK	negbinomial.size	7.36853e-65	9.78129e-64	1	218
Foxn3	OK	negbinomial.size	7.54184e-65	1.00016e-63	1	244
Krt7	OK	negbinomial.size	1.03938e-64	1.37434e-63	1	219
Slc1a4	OK	negbinomial.size	2.95734e-64	3.88022e-63	1	506
Rpl30	OK	negbinomial.size	4.21212e-64	5.52124e-63	1	4006
Deptor	OK	negbinomial.size	4.70811e-64	6.15952e-63	1	161
2010111I01Rik	OK	negbinomial.size	7.73175e-64	1.00861e-62	1	360
Ptrf	OK	negbinomial.size	1.04126e-63	1.35573e-62	1	151
Akr1b3	OK	negbinomial.size	1.05904e-63	1.37757e-62	1	262
Irf6	OK	negbinomial.size	2.14326e-63	2.77461e-62	1	571
Rpl10-ps3	OK	negbinomial.size	2.81346e-63	3.62841e-62	1	1177
Itga6	OK	negbinomial.size	3.51844e-63	4.5247e-62	1	265
Rpsa	OK	negbinomial.size	1.01259e-62	1.2985e-61	1	3999
Pde7a	OK	negbinomial.size	1.03268e-62	1.32302e-61	1	293
Tmbim1	OK	negbinomial.size	1.52719e-62	1.94738e-61	1	217
Rps3	OK	negbinomial.size	2.09967e-62	2.66488e-61	1	4620
Foxo1	OK	negbinomial.size	2.17071e-62	2.75247e-61	1	518
Mtmr11	OK	negbinomial.size	2.48612e-62	3.14654e-61	1	119
Lmo7	OK	negbinomial.size	4.27859e-62	5.40171e-61	1	295
Klf3	OK	negbinomial.size	6.30427e-62	7.94198e-61	1	768
Rps11	OK	negbinomial.size	6.68448e-62	8.41316e-61	1	4652
Nbl1	OK	negbinomial.size	6.76943e-62	8.5122e-61	1	147
Chd3	OK	negbinomial.size	7.12351e-62	8.94916e-61	1	971
Capns1	OK	negbinomial.size	7.45985e-62	9.36305e-61	1	1083
Sgms1	OK	negbinomial.size	8.27921e-62	1.03819e-60	1	296
Asph	OK	negbinomial.size	9.20813e-62	1.1536e-60	1	619
Met	OK	negbinomial.size	9.64976e-62	1.20671e-60	1	218
Selenbp1	OK	negbinomial.size	1.37577e-61	1.71567e-60	1	197
Atrx	OK	negbinomial.size	1.69345e-61	2.10604e-60	1	2279
Rab27b	OK	negbinomial.size	1.94078e-61	2.41142e-60	1	230
Siva1	OK	negbinomial.size	2.73232e-61	3.38255e-60	1	833
Ajuba	OK	negbinomial.size	6.92495e-61	8.52635e-60	1	144
Six2	OK	negbinomial.size	6.94963e-61	8.54899e-60	1	193
Rpl22l1	OK	negbinomial.size	7.6649e-61	9.40334e-60	1	3314
Avpi1	OK	negbinomial.size	9.52427e-61	1.16739e-59	1	224
Slc1a3	OK	negbinomial.size	1.17839e-59	1.41876e-58	1	134
Ifi27l2a	OK	negbinomial.size	1.47956e-59	1.77822e-58	1	378
Golim4	OK	negbinomial.size	1.86055e-59	2.23414e-58	1	430
Ddr1	OK	negbinomial.size	2.18219e-59	2.61806e-58	1	395
Lamp2	OK	negbinomial.size	3.42958e-59	4.10011e-58	1	1284
Slc35d1	OK	negbinomial.size	5.7012e-59	6.79198e-58	1	408
Rpl8	OK	negbinomial.size	6.80506e-59	8.08577e-58	1	4558
Cpne8	OK	negbinomial.size	9.26529e-59	1.09994e-57	1	176
Fgfr2	OK	negbinomial.size	1.36462e-58	1.61438e-57	1	157
Otx1	OK	negbinomial.size	1.37153e-58	1.62114e-57	1	241
Dsg2	OK	negbinomial.size	1.51022e-58	1.78198e-57	1	306
Fmo1	OK	negbinomial.size	1.54355e-58	1.81815e-57	1	139
Rab8b	OK	negbinomial.size	2.20605e-58	2.59402e-57	1	486
Sox9	OK	negbinomial.size	2.55939e-58	3.00689e-57	1	260
Rps8	OK	negbinomial.size	8.37153e-58	9.73432e-57	1	4998
Ptges	OK	negbinomial.size	9.81445e-58	1.13926e-56	1	150
Fmnl2	OK	negbinomial.size	1.58927e-57	1.84012e-56	1	567
Smco4	OK	negbinomial.size	1.77397e-57	2.04352e-56	1	241
Zbtb20	OK	negbinomial.size	2.21481e-57	2.53844e-56	1	1616
Alcam	OK	negbinomial.size	6.1668e-57	7.02055e-56	1	457
Hspb8	OK	negbinomial.size	6.68439e-57	7.59707e-56	1	210
Cp	OK	negbinomial.size	1.21369e-56	1.37596e-55	1	137
Ces2g	OK	negbinomial.size	1.37801e-56	1.55835e-55	1	129
Tpm1	OK	negbinomial.size	1.54577e-56	1.74371e-55	1	984
Rpl7	OK	negbinomial.size	1.60532e-56	1.80938e-55	1	4483
Tnfrsf1a	OK	negbinomial.size	1.62906e-56	1.83462e-55	1	236
Ube2i	OK	negbinomial.size	2.12581e-56	2.38025e-55	1	1032
Tspo	OK	negbinomial.size	4.28609e-56	4.76377e-55	1	639
Aox3	OK	negbinomial.size	4.50435e-56	5.00226e-55	1	131
Rnase4	OK	negbinomial.size	6.36526e-56	7.05734e-55	1	163
Svil	OK	negbinomial.size	7.15693e-56	7.92216e-55	1	205
Xdh	OK	negbinomial.size	1.87424e-55	2.05477e-54	1	198
Ccdc153	OK	negbinomial.size	7.64207e-55	8.30365e-54	1	171
Mrpl52	OK	negbinomial.size	7.93854e-55	8.6189e-54	1	2008
Uba52	OK	negbinomial.size	9.84039e-55	1.06582e-53	1	3869
Nrbp2	OK	negbinomial.size	1.72907e-54	1.86533e-53	1	859
Sostdc1	OK	negbinomial.size	2.35498e-54	2.52853e-53	1	109
Tle4	OK	negbinomial.size	3.00819e-54	3.21971e-53	1	327
Igfbp3	OK	negbinomial.size	4.06469e-54	4.33344e-53	1	149
Lpar6	OK	negbinomial.size	4.36546e-54	4.6468e-53	1	179
Sgk1	OK	negbinomial.size	4.52713e-54	4.81512e-53	1	613
Aldh1l1	OK	negbinomial.size	6.73753e-54	7.14378e-53	1	156
Cryl1	OK	negbinomial.size	6.77888e-54	7.18202e-53	1	374
Ctsd	OK	negbinomial.size	1.11386e-53	1.17461e-52	1	1545
Pid1	OK	negbinomial.size	1.68506e-53	1.76193e-52	1	169
Rpl4	OK	negbinomial.size	2.01114e-53	2.09642e-52	1	4277
Wdr26	OK	negbinomial.size	2.20342e-53	2.2951e-52	1	1391
Ltbr	OK	negbinomial.size	2.53402e-53	2.63744e-52	1	253
Mmd	OK	negbinomial.size	5.32047e-53	5.49971e-52	1	309
Prkci	OK	negbinomial.size	7.20451e-53	7.43027e-52	1	532
Capg	OK	negbinomial.size	7.57765e-53	7.80917e-52	1	201
Amotl2	OK	negbinomial.size	1.31413e-52	1.34612e-51	1	225
Celsr1	OK	negbinomial.size	1.36687e-52	1.39803e-51	1	223
Ntf5	OK	negbinomial.size	4.1821e-52	4.24234e-51	1	118
Fkbp9	OK	negbinomial.size	4.75222e-52	4.80989e-51	1	226
Agrn	OK	negbinomial.size	5.29703e-52	5.35733e-51	1	522
Plekhg3	OK	negbinomial.size	6.86359e-52	6.93141e-51	1	232
Vangl2	OK	negbinomial.size	9.33957e-52	9.42485e-51	1	289
Kremen1	OK	negbinomial.size	9.65517e-52	9.72889e-51	1	260
Olfml2a	OK	negbinomial.size	1.05344e-51	1.0607e-50	1	118
Fam129a	OK	negbinomial.size	1.0675e-51	1.07406e-50	1	246
Il17rd	OK	negbinomial.size	1.20845e-51	1.21318e-50	1	533
Sntb2	OK	negbinomial.size	1.23971e-51	1.24364e-50	1	162
Cd36	OK	negbinomial.size	1.55149e-51	1.55069e-50	1	487
Nrip1	OK	negbinomial.size	2.29106e-51	2.2882e-50	1	773
Rpl26	OK	negbinomial.size	3.62285e-51	3.61567e-50	1	4959
Dek	OK	negbinomial.size	5.61394e-51	5.57824e-50	1	840
Mast4	OK	negbinomial.size	5.71025e-51	5.66979e-50	1	1244
Pgrmc1	OK	negbinomial.size	7.29257e-51	7.22507e-50	1	2537
Hist1h1e	OK	negbinomial.size	8.58584e-51	8.50017e-50	1	307
Krt23	OK	negbinomial.size	8.98386e-51	8.87483e-50	1	267
Itgav	OK	negbinomial.size	9.91726e-51	9.78268e-50	1	205
Cyr61	OK	negbinomial.size	1.40304e-50	1.38e-49	1	162
Slc12a4	OK	negbinomial.size	1.63501e-50	1.60699e-49	1	143
Gpr87	OK	negbinomial.size	2.01231e-50	1.97355e-49	1	102
Fgfr3	OK	negbinomial.size	2.6902e-50	2.63268e-49	1	114
Elf1	OK	negbinomial.size	3.98569e-50	3.8809e-49	1	539
Sftpd	OK	negbinomial.size	4.27247e-50	4.15717e-49	1	160
Sp8	OK	negbinomial.size	4.49209e-50	4.36462e-49	1	281
Esd	OK	negbinomial.size	5.93022e-50	5.74551e-49	1	669
Cd151	OK	negbinomial.size	6.60177e-50	6.3825e-49	1	235
Tef	OK	negbinomial.size	6.74126e-50	6.51272e-49	1	863
Vwa1	OK	negbinomial.size	1.02269e-49	9.83822e-49	1	185
Pard3	OK	negbinomial.size	1.29536e-49	1.24086e-48	1	794
Adss	OK	negbinomial.size	1.30117e-49	1.24555e-48	1	737
Ptpre	OK	negbinomial.size	1.90373e-49	1.81469e-48	1	211
Yap1	OK	negbinomial.size	1.93281e-49	1.83983e-48	1	212
Fmod	OK	negbinomial.size	2.82395e-49	2.67871e-48	1	105
Trpv4	OK	negbinomial.size	3.38631e-49	3.20767e-48	1	149
Dhrs3	OK	negbinomial.size	5.79242e-49	5.44511e-48	1	513
Ackr4	OK	negbinomial.size	8.18164e-49	7.66457e-48	1	141
Dsc2	OK	negbinomial.size	1.70265e-48	1.5863e-47	1	219
Sorcs2	OK	negbinomial.size	2.84965e-48	2.63865e-47	1	101
Lbp	OK	negbinomial.size	3.93831e-48	3.63925e-47	1	127
Nrtn	OK	negbinomial.size	4.0462e-48	3.73641e-47	1	206
Tmem108	OK	negbinomial.size	4.82394e-48	4.45159e-47	1	122
Sh3d19	OK	negbinomial.size	6.52188e-48	6.00623e-47	1	180
Tpr	OK	negbinomial.size	1.40511e-47	1.28791e-46	1	1632
Tmem30b	OK	negbinomial.size	1.40746e-47	1.28919e-46	1	285
Pla2g7	OK	negbinomial.size	1.53924e-47	1.408e-46	1	145
Ehf	OK	negbinomial.size	1.59516e-47	1.45818e-46	1	184
Rpl23a-ps3	OK	negbinomial.size	1.77129e-47	1.61808e-46	1	975
Zfhx4	OK	negbinomial.size	4.03557e-47	3.65947e-46	1	539
Rpl28	OK	negbinomial.size	4.72201e-47	4.27909e-46	1	4573
Elovl6	OK	negbinomial.size	7.23512e-47	6.54773e-46	1	177
Vezf1	OK	negbinomial.size	9.40653e-47	8.49588e-46	1	967
Rpl19	OK	negbinomial.size	1.24886e-46	1.12496e-45	1	4827
Plxdc2	OK	negbinomial.size	1.56684e-46	1.40581e-45	1	151
Cpd	OK	negbinomial.size	1.75279e-46	1.57058e-45	1	616
Pkp1	OK	negbinomial.size	2.19131e-46	1.95835e-45	1	113
Tril	OK	negbinomial.size	2.33712e-46	2.08728e-45	1	81
Ctnnal1	OK	negbinomial.size	2.65061e-46	2.36416e-45	1	196
4930523C07Rik	OK	negbinomial.size	2.91503e-46	2.5966e-45	1	160
Ppic	OK	negbinomial.size	3.27244e-46	2.91167e-45	1	174
Rassf2	OK	negbinomial.size	5.2464e-46	4.63984e-45	1	381
Tgif1	OK	negbinomial.size	5.66675e-46	5.00833e-45	1	246
Mgll	OK	negbinomial.size	6.98146e-46	6.16227e-45	1	237
Srebf1	OK	negbinomial.size	7.76558e-46	6.8322e-45	1	346
Ctdspl	OK	negbinomial.size	1.12799e-45	9.88577e-45	1	184
Trim25	OK	negbinomial.size	1.65389e-45	1.44389e-44	1	336
Nr1d2	OK	negbinomial.size	1.99433e-45	1.73553e-44	1	439
P4hb	OK	negbinomial.size	2.92853e-45	2.54524e-44	1	866
Npc2	OK	negbinomial.size	3.97225e-45	3.44355e-44	1	952
Scel	OK	negbinomial.size	4.02475e-45	3.48683e-44	1	94
Tsku	OK	negbinomial.size	4.45548e-45	3.85508e-44	1	252
5930430L01Rik	OK	negbinomial.size	4.60282e-45	3.98003e-44	1	266
Add3	OK	negbinomial.size	5.80613e-45	5.01097e-44	1	267
Rcn1	OK	negbinomial.size	6.72428e-45	5.78867e-44	1	185
Utrn	OK	negbinomial.size	7.77694e-45	6.6864e-44	1	186
Gpc3	OK	negbinomial.size	1.17795e-44	1.01149e-43	1	97
Atp13a3	OK	negbinomial.size	1.37381e-44	1.17596e-43	1	446
Boc	OK	negbinomial.size	1.75346e-44	1.49622e-43	1	159
Tfrc	OK	negbinomial.size	1.78043e-44	1.51828e-43	1	472
Cbx5	OK	negbinomial.size	2.10653e-44	1.79187e-43	1	707
Mylip	OK	negbinomial.size	2.47501e-44	2.09743e-43	1	202
Axl	OK	negbinomial.size	2.80622e-44	2.37367e-43	1	139
Gpx2	OK	negbinomial.size	3.18567e-44	2.69296e-43	1	163
Mmp14	OK	negbinomial.size	3.37824e-44	2.85397e-43	1	179
Cav2	OK	negbinomial.size	3.58336e-44	3.01975e-43	1	122
Ephb3	OK	negbinomial.size	4.11081e-44	3.45781e-43	1	180
Srgap3	OK	negbinomial.size	4.40415e-44	3.69769e-43	1	184
Tmem63a	OK	negbinomial.size	4.52364e-44	3.79567e-43	1	195
Parm1	OK	negbinomial.size	4.71088e-44	3.9479e-43	1	162
Slc3a2	OK	negbinomial.size	5.95946e-44	4.97585e-43	1	1540
Sord	OK	negbinomial.size	6.76687e-44	5.63271e-43	1	303
Ephb1	OK	negbinomial.size	7.91769e-44	6.58258e-43	1	184
Tob2	OK	negbinomial.size	1.22017e-43	1.00886e-42	1	530
Cxxc5	OK	negbinomial.size	1.32851e-43	1.09644e-42	1	309
Bhlhe40	OK	negbinomial.size	1.38791e-43	1.14408e-42	1	153
Rpl34	OK	negbinomial.size	1.50397e-43	1.239e-42	1	4515
Cpne3	OK	negbinomial.size	1.56983e-43	1.29247e-42	1	678
Trim56	OK	negbinomial.size	1.75725e-43	1.44241e-42	1	444
Bbx	OK	negbinomial.size	1.77618e-43	1.45707e-42	1	676
Tnrc18	OK	negbinomial.size	4.62595e-43	3.76305e-42	1	391
Arhgef5	OK	negbinomial.size	5.80347e-43	4.71246e-42	1	153
Ctsh	OK	negbinomial.size	6.3793e-43	5.16461e-42	1	223
Fmo5	OK	negbinomial.size	9.10455e-43	7.34906e-42	1	201
Psme1	OK	negbinomial.size	3.14068e-42	2.51125e-41	1	564
Myo18a	OK	negbinomial.size	4.35882e-42	3.47504e-41	1	321
Gramd3	OK	negbinomial.size	5.32981e-42	4.23921e-41	1	144
Tenm4	OK	negbinomial.size	5.87991e-42	4.67128e-41	1	703
Klhdc8a	OK	negbinomial.size	6.86667e-42	5.44884e-41	1	110
Six4	OK	negbinomial.size	7.44116e-42	5.89782e-41	1	187
Ncl	OK	negbinomial.size	7.45782e-42	5.90759e-41	1	2710
Msmo1	OK	negbinomial.size	1.08378e-41	8.5402e-41	1	668
Acadl	OK	negbinomial.size	1.28313e-41	1.01052e-40	1	218
Pcolce	OK	negbinomial.size	1.44058e-41	1.1319e-40	1	108
Rpl21	OK	negbinomial.size	1.54288e-41	1.21018e-40	1	4885
Tsix	OK	negbinomial.size	1.71134e-41	1.34154e-40	1	78
Pkp3	OK	negbinomial.size	2.04299e-41	1.59968e-40	1	126
Swap70	OK	negbinomial.size	2.16622e-41	1.69422e-40	1	198
Gdf5	OK	negbinomial.size	3.12643e-41	2.43539e-40	1	92
Ets2	OK	negbinomial.size	3.2172e-41	2.50466e-40	1	279
Abcd3	OK	negbinomial.size	3.45842e-41	2.68938e-40	1	425
Scd1	OK	negbinomial.size	5.60178e-41	4.32642e-40	1	233
Ankrd11	OK	negbinomial.size	7.13685e-41	5.49639e-40	1	1539
Nt5dc2	OK	negbinomial.size	7.77092e-41	5.98132e-40	1	221
Tenm3	OK	negbinomial.size	8.9894e-41	6.90746e-40	1	303
Spry1	OK	negbinomial.size	1.07395e-40	8.21967e-40	1	250
Mapk13	OK	negbinomial.size	1.10964e-40	8.48813e-40	1	243
Ghr	OK	negbinomial.size	1.24054e-40	9.46807e-40	1	147
Palld	OK	negbinomial.size	1.51035e-40	1.14951e-39	1	106
Ktn1	OK	negbinomial.size	1.58188e-40	1.20327e-39	1	1635
Prps2	OK	negbinomial.size	1.68496e-40	1.27953e-39	1	180
Nsa2	OK	negbinomial.size	2.36422e-40	1.78836e-39	1	1112
Rpl24	OK	negbinomial.size	3.4772e-40	2.62004e-39	1	4768
Tnrc6a	OK	negbinomial.size	4.15117e-40	3.12268e-39	1	1281
Smo	OK	negbinomial.size	4.78954e-40	3.60089e-39	1	141
Idi1	OK	negbinomial.size	4.95607e-40	3.72404e-39	1	585
Hook3	OK	negbinomial.size	7.60863e-40	5.71404e-39	1	690
Ankrd6	OK	negbinomial.size	9.27006e-40	6.95408e-39	1	194
Tanc1	OK	negbinomial.size	9.57356e-40	7.17779e-39	1	707
Fzd7	OK	negbinomial.size	1.32934e-39	9.91749e-39	1	229
Cd14	OK	negbinomial.size	1.40868e-39	1.04922e-38	1	103
Cebpa	OK	negbinomial.size	1.41589e-39	1.05401e-38	1	388
Crot	OK	negbinomial.size	1.70849e-39	1.26766e-38	1	343
Gcnt1	OK	negbinomial.size	2.53999e-39	1.87642e-38	1	174
Epb41l2	OK	negbinomial.size	2.60878e-39	1.92619e-38	1	823
Usp25	OK	negbinomial.size	2.65954e-39	1.9626e-38	1	395
Rhobtb3	OK	negbinomial.size	2.72997e-39	2.01348e-38	1	246
Sult5a1	OK	negbinomial.size	7.05465e-39	5.17227e-38	1	86
Pvrl1	OK	negbinomial.size	7.11221e-39	5.21166e-38	1	253
Myh9	OK	negbinomial.size	8.03953e-39	5.8785e-38	1	706
Prr5l	OK	negbinomial.size	8.2112e-39	6.0008e-38	1	127
Cst3	OK	negbinomial.size	8.25618e-39	6.03043e-38	1	2356
Gpha2	OK	negbinomial.size	9.02302e-39	6.57993e-38	1	92
Myof	OK	negbinomial.size	9.82006e-39	7.15733e-38	1	127
Slc35f3	OK	negbinomial.size	1.52648e-38	1.10782e-37	1	75
Dse	OK	negbinomial.size	2.4427e-38	1.76803e-37	1	103
Klf15	OK	negbinomial.size	2.47207e-38	1.78834e-37	1	116
Lrp4	OK	negbinomial.size	2.56728e-38	1.85623e-37	1	133
Myh14	OK	negbinomial.size	2.77227e-38	2.00231e-37	1	203
Chd6	OK	negbinomial.size	3.12183e-38	2.25119e-37	1	1018
Tiam1	OK	negbinomial.size	4.65732e-38	3.34426e-37	1	277
St3gal6	OK	negbinomial.size	5.13968e-38	3.68673e-37	1	191
Map3k1	OK	negbinomial.size	5.3401e-38	3.82445e-37	1	191
Nrg2	OK	negbinomial.size	5.44614e-38	3.89834e-37	1	106
Ets1	OK	negbinomial.size	5.66512e-38	4.04868e-37	1	165
Tmem141	OK	negbinomial.size	6.12628e-38	4.37136e-37	1	206
Nfkb1	OK	negbinomial.size	7.9738e-38	5.67179e-37	1	316
Nfic	OK	negbinomial.size	8.55562e-38	6.08245e-37	1	509
Slk	OK	negbinomial.size	1.05538e-37	7.49515e-37	1	559
Phactr2	OK	negbinomial.size	1.20724e-37	8.55577e-37	1	344
Tmcc3	OK	negbinomial.size	1.22503e-37	8.67733e-37	1	683
Notch2	OK	negbinomial.size	1.58335e-37	1.11805e-36	1	169
Gm9493	OK	negbinomial.size	1.58571e-37	1.11913e-36	1	697
Plxnb1	OK	negbinomial.size	1.74456e-37	1.22869e-36	1	738
Ier3	OK	negbinomial.size	1.96282e-37	1.38027e-36	1	236
Rock2	OK	negbinomial.size	2.21261e-37	1.55352e-36	1	643
Mtss1	OK	negbinomial.size	2.96419e-37	2.07158e-36	1	266
Msrb3	OK	negbinomial.size	3.23035e-37	2.25527e-36	1	165
Zfp503	OK	negbinomial.size	3.37498e-37	2.35383e-36	1	304
Gulp1	OK	negbinomial.size	3.90901e-37	2.71791e-36	1	108
Set	OK	negbinomial.size	8.51049e-37	5.88119e-36	1	2319
Sema4b	OK	negbinomial.size	1.08479e-36	7.47369e-36	1	428
Ctgf	OK	negbinomial.size	1.10281e-36	7.59394e-36	1	99
Pgm2l1	OK	negbinomial.size	1.76724e-36	1.21262e-35	1	228
Ldlr	OK	negbinomial.size	1.84467e-36	1.26511e-35	1	233
Sall1	OK	negbinomial.size	1.95499e-36	1.33807e-35	1	135
Canx	OK	negbinomial.size	2.60238e-36	1.77581e-35	1	2012
Lgalsl	OK	negbinomial.size	3.78025e-36	2.57053e-35	1	151
Lzts1	OK	negbinomial.size	4.02161e-36	2.72919e-35	1	183
Trp53	OK	negbinomial.size	4.13958e-36	2.80645e-35	1	389
Fah	OK	negbinomial.size	4.175e-36	2.82905e-35	1	113
Hmcn1	OK	negbinomial.size	5.09873e-36	3.4464e-35	1	142
Dram1	OK	negbinomial.size	5.52527e-36	3.731e-35	1	83
2200002D01Rik	OK	negbinomial.size	5.55673e-36	3.75038e-35	1	111
Lrp2	OK	negbinomial.size	6.99205e-36	4.69116e-35	1	181
Cat	OK	negbinomial.size	7.99449e-36	5.35844e-35	1	280
Gng12	OK	negbinomial.size	8.43291e-36	5.64673e-35	1	204
Hdac7	OK	negbinomial.size	9.77331e-36	6.5314e-35	1	162
Serpinb5	OK	negbinomial.size	1.38441e-35	9.21559e-35	1	66
Hspa1b	OK	negbinomial.size	1.54453e-35	1.02564e-34	1	140
Oit1	OK	negbinomial.size	1.54943e-35	1.02839e-34	1	92
Tab2	OK	negbinomial.size	1.66491e-35	1.10395e-34	1	798
Sorbs3	OK	negbinomial.size	1.90072e-35	1.25848e-34	1	132
Plek2	OK	negbinomial.size	2.96219e-35	1.95083e-34	1	75
Dock1	OK	negbinomial.size	3.48442e-35	2.28921e-34	1	145
Sox21	OK	negbinomial.size	3.85538e-35	2.5317e-34	1	166
Ctdsp1	OK	negbinomial.size	4.01854e-35	2.63757e-34	1	249
Gmpr	OK	negbinomial.size	4.19027e-35	2.74763e-34	1	235
Ybx3	OK	negbinomial.size	5.69048e-35	3.71521e-34	1	820
Maml3	OK	negbinomial.size	5.91994e-35	3.86317e-34	1	281
Zak	OK	negbinomial.size	7.72024e-35	5.01631e-34	1	209
Cuedc1	OK	negbinomial.size	8.79388e-35	5.7003e-34	1	254
Plcd3	OK	negbinomial.size	1.21985e-34	7.87719e-34	1	84
Lrp1	OK	negbinomial.size	1.31796e-34	8.49858e-34	1	164
Efnb2	OK	negbinomial.size	1.3778e-34	8.88027e-34	1	186
Gnaq	OK	negbinomial.size	1.40017e-34	9.02016e-34	1	639
Tmem98	OK	negbinomial.size	1.56872e-34	1.01012e-33	1	178
Ctf1	OK	negbinomial.size	1.82176e-34	1.17084e-33	1	150
Ly6d	OK	negbinomial.size	1.89423e-34	1.21626e-33	1	203
Actn4	OK	negbinomial.size	2.10346e-34	1.34933e-33	1	849
Kcnj16	OK	negbinomial.size	2.59035e-34	1.6523e-33	1	62
Nsd1	OK	negbinomial.size	2.7387e-34	1.74529e-33	1	1008
Atp11a	OK	negbinomial.size	2.96826e-34	1.88982e-33	1	850
Mob1a	OK	negbinomial.size	3.02138e-34	1.92094e-33	1	628
Plce1	OK	negbinomial.size	3.41407e-34	2.16958e-33	1	168
Tgfbr2	OK	negbinomial.size	4.19596e-34	2.65653e-33	1	131
Nxn	OK	negbinomial.size	4.88307e-34	3.08293e-33	1	270
Amer1	OK	negbinomial.size	6.94329e-34	4.36743e-33	1	383
Rbp1	OK	negbinomial.size	7.36148e-34	4.62718e-33	1	123
Smim4	OK	negbinomial.size	7.36305e-34	4.62718e-33	1	634
1810010H24Rik	OK	negbinomial.size	1.04718e-33	6.55356e-33	1	121
Klf5	OK	negbinomial.size	1.13481e-33	7.09216e-33	1	114
Ephb2	OK	negbinomial.size	1.27861e-33	7.97622e-33	1	158
Rps25	OK	negbinomial.size	1.85533e-33	1.15421e-32	1	4636
Igf2r	OK	negbinomial.size	1.88629e-33	1.1724e-32	1	242
Smim1	OK	negbinomial.size	2.91688e-33	1.80634e-32	1	206
Rora	OK	negbinomial.size	3.31092e-33	2.04663e-32	1	266
Cyb5r3	OK	negbinomial.size	3.81124e-33	2.35375e-32	1	813
Hs6st2	OK	negbinomial.size	4.6101e-33	2.83681e-32	1	86
Glis3	OK	negbinomial.size	5.06616e-33	3.11462e-32	1	120
Fasn	OK	negbinomial.size	6.27651e-33	3.8535e-32	1	206
Elf3	OK	negbinomial.size	7.77619e-33	4.76563e-32	1	124
Acpp	OK	negbinomial.size	8.936e-33	5.46656e-32	1	148
Il17re	OK	negbinomial.size	9.60786e-33	5.87229e-32	1	134
Rras	OK	negbinomial.size	1.1354e-32	6.92088e-32	1	84
Sqle	OK	negbinomial.size	1.36165e-32	8.27769e-32	1	709
Gnai1	OK	negbinomial.size	1.42133e-32	8.62893e-32	1	86
Suclg2	OK	negbinomial.size	1.80843e-32	1.09546e-31	1	338
Ehd2	OK	negbinomial.size	1.91082e-32	1.15696e-31	1	84
Nradd	OK	negbinomial.size	1.97351e-32	1.19439e-31	1	147
Gstt3	OK	negbinomial.size	3.15729e-32	1.90404e-31	1	184
Tmed1	OK	negbinomial.size	3.40682e-32	2.0527e-31	1	203
Wwc2	OK	negbinomial.size	3.91008e-32	2.3528e-31	1	162
P2ry1	OK	negbinomial.size	4.77428e-32	2.87027e-31	1	100
Inafm2	OK	negbinomial.size	5.441e-32	3.26244e-31	1	135
Cx3cl1	OK	negbinomial.size	5.78887e-32	3.46338e-31	1	178
Rpl36al	OK	negbinomial.size	6.18461e-32	3.69527e-31	1	3275
Egfl6	OK	negbinomial.size	6.66115e-32	3.97302e-31	1	75
Adgrg2	OK	negbinomial.size	7.45563e-32	4.43715e-31	1	155
Plscr2	OK	negbinomial.size	8.04742e-32	4.78725e-31	1	109
Serpinb9	OK	negbinomial.size	8.07897e-32	4.80391e-31	1	90
Tmem205	OK	negbinomial.size	8.89217e-32	5.27822e-31	1	787
Magt1	OK	negbinomial.size	9.68736e-32	5.74522e-31	1	506
Steap2	OK	negbinomial.size	9.8131e-32	5.81725e-31	1	323
Lgr6	OK	negbinomial.size	1.03489e-31	6.1322e-31	1	89
Eps8	OK	negbinomial.size	1.24006e-31	7.33197e-31	1	104
Hspa1a	OK	negbinomial.size	1.35364e-31	7.99307e-31	1	150
Kcnk2	OK	negbinomial.size	1.46802e-31	8.64804e-31	1	157
Syngr2	OK	negbinomial.size	1.4789e-31	8.70625e-31	1	193
Gga2	OK	negbinomial.size	1.48054e-31	8.71211e-31	1	241
Col18a1	OK	negbinomial.size	1.55474e-31	9.14083e-31	1	180
Apobec1	OK	negbinomial.size	1.58998e-31	9.34397e-31	1	104
Npnt	OK	negbinomial.size	1.63459e-31	9.59784e-31	1	128
Npl	OK	negbinomial.size	1.74556e-31	1.02406e-30	1	76
Ctdsp2	OK	negbinomial.size	1.84255e-31	1.07956e-30	1	733
Bmp7	OK	negbinomial.size	1.89535e-31	1.10906e-30	1	136
Cadm2	OK	negbinomial.size	2.09392e-31	1.2242e-30	1	111
Sh3pxd2b	OK	negbinomial.size	2.25828e-31	1.31859e-30	1	106
Usp53	OK	negbinomial.size	2.31092e-31	1.34875e-30	1	625
Tspan6	OK	negbinomial.size	3.13083e-31	1.82181e-30	1	394
D16Ertd472e	OK	negbinomial.size	3.32432e-31	1.93192e-30	1	105
Eps8l2	OK	negbinomial.size	3.62842e-31	2.10594e-30	1	128
Mxd4	OK	negbinomial.size	3.71803e-31	2.15703e-30	1	968
Megf6	OK	negbinomial.size	4.22521e-31	2.44918e-30	1	90
Emp1	OK	negbinomial.size	4.30863e-31	2.49647e-30	1	83
Tns2	OK	negbinomial.size	4.32291e-31	2.50368e-30	1	101
Sdk2	OK	negbinomial.size	4.70371e-31	2.72191e-30	1	80
Rasa4	OK	negbinomial.size	8.54105e-31	4.90074e-30	1	123
Snhg18	OK	negbinomial.size	1.07308e-30	6.14938e-30	1	119
Pygb	OK	negbinomial.size	1.25704e-30	7.19449e-30	1	344
Camk1d	OK	negbinomial.size	1.47175e-30	8.40919e-30	1	95
Wbscr27	OK	negbinomial.size	1.5323e-30	8.7515e-30	1	207
Ifi27	OK	negbinomial.size	1.87176e-30	1.065e-29	1	724
Etl4	OK	negbinomial.size	2.00107e-30	1.13667e-29	1	579
Sult1b1	OK	negbinomial.size	2.0763e-30	1.17792e-29	1	104
Cyp3a13	OK	negbinomial.size	2.19609e-30	1.24381e-29	1	110
Grhl2	OK	negbinomial.size	2.40521e-30	1.36055e-29	1	122
Slc25a4	OK	negbinomial.size	2.53136e-30	1.43072e-29	1	1805
Maml2	OK	negbinomial.size	2.83924e-30	1.60206e-29	1	255
Col25a1	OK	negbinomial.size	4.25616e-30	2.38573e-29	1	60
Klhl21	OK	negbinomial.size	4.35312e-30	2.43807e-29	1	407
Tmem245	OK	negbinomial.size	4.39895e-30	2.4607e-29	1	430
Rest	OK	negbinomial.size	4.61582e-30	2.58095e-29	1	181
Ccdc50	OK	negbinomial.size	4.77987e-30	2.67048e-29	1	412
Ak3	OK	negbinomial.size	5.80996e-30	3.24066e-29	1	259
Sppl2a	OK	negbinomial.size	7.20608e-30	4.01444e-29	1	487
Insig1	OK	negbinomial.size	7.30592e-30	4.06839e-29	1	277
Acad11	OK	negbinomial.size	7.83937e-30	4.3583e-29	1	528
Plagl1	OK	negbinomial.size	9.81459e-30	5.43863e-29	1	159
Il17rc	OK	negbinomial.size	1.0185e-29	5.63472e-29	1	115
Aprt	OK	negbinomial.size	1.10376e-29	6.1039e-29	1	689
Pvrl3	OK	negbinomial.size	1.16671e-29	6.44943e-29	1	221
Tspan9	OK	negbinomial.size	1.75512e-29	9.62766e-29	1	66
Plekha6	OK	negbinomial.size	1.8373e-29	1.00663e-28	1	564
Itpkb	OK	negbinomial.size	2.01548e-29	1.10247e-28	1	464
Ifi30	OK	negbinomial.size	2.07776e-29	1.13608e-28	1	182
Cdc42ep5	OK	negbinomial.size	2.08929e-29	1.14192e-28	1	115
Samd9l	OK	negbinomial.size	2.37413e-29	1.29501e-28	1	117
Mbd3	OK	negbinomial.size	3.02748e-29	1.6461e-28	1	663
Adamtsl5	OK	negbinomial.size	3.27352e-29	1.77774e-28	1	69
Arhgap10	OK	negbinomial.size	3.44605e-29	1.86994e-28	1	107
Plpp2	OK	negbinomial.size	3.56741e-29	1.93195e-28	1	142
Psat1	OK	negbinomial.size	3.83534e-29	2.07621e-28	1	158
Arl4c	OK	negbinomial.size	4.18051e-29	2.26217e-28	1	240
Zfp292	OK	negbinomial.size	4.37613e-29	2.36426e-28	1	1165
Atf1	OK	negbinomial.size	4.52737e-29	2.44306e-28	1	715
Slc1a5	OK	negbinomial.size	4.75602e-29	2.56542e-28	1	139
3110039M20Rik.1	OK	negbinomial.size	4.90163e-29	2.64291e-28	1	124
Lama5	OK	negbinomial.size	5.75439e-29	3.0978e-28	1	123
Entpd5	OK	negbinomial.size	6.59953e-29	3.54575e-28	1	694
Rtf1	OK	negbinomial.size	7.25404e-29	3.89124e-28	1	1586
Cox6b2	OK	negbinomial.size	8.47105e-29	4.53334e-28	1	179
Tnfrsf19	OK	negbinomial.size	8.81529e-29	4.71386e-28	1	96
Iqgap1	OK	negbinomial.size	2.01605e-28	1.0709e-27	1	1666
Spr	OK	negbinomial.size	2.39721e-28	1.26939e-27	1	312
Pdlim3	OK	negbinomial.size	2.43446e-28	1.28811e-27	1	110
Pdia6	OK	negbinomial.size	2.54802e-28	1.34768e-27	1	1176
Rpl6l	OK	negbinomial.size	3.08417e-28	1.62619e-27	1	552
Dll1	OK	negbinomial.size	3.44047e-28	1.81124e-27	1	86
Drap1	OK	negbinomial.size	3.75332e-28	1.97365e-27	1	666
Lrrfip1	OK	negbinomial.size	5.11517e-28	2.67322e-27	1	268
8430408G22Rik	OK	negbinomial.size	5.73446e-28	2.99112e-27	1	46
Insl6	OK	negbinomial.size	5.84343e-28	3.04562e-27	1	149
Kcnj15	OK	negbinomial.size	6.45222e-28	3.35906e-27	1	134
Rpl36-ps3	OK	negbinomial.size	6.72886e-28	3.50174e-27	1	448
Smad5	OK	negbinomial.size	7.76043e-28	4.0324e-27	1	239
Kmt2e	OK	negbinomial.size	7.98835e-28	4.14607e-27	1	1455
Kat6b	OK	negbinomial.size	9.01224e-28	4.67392e-27	1	477
Ppfibp1	OK	negbinomial.size	9.03629e-28	4.68461e-27	1	323
Taok2	OK	negbinomial.size	1.09846e-27	5.68163e-27	1	492
Ep300	OK	negbinomial.size	1.14258e-27	5.90761e-27	1	826
Adgrg1	OK	negbinomial.size	1.55012e-27	7.9874e-27	1	177
Scmh1	OK	negbinomial.size	1.55972e-27	8.03384e-27	1	285
Spred1	OK	negbinomial.size	1.61163e-27	8.29495e-27	1	424
Il11ra1	OK	negbinomial.size	1.61798e-27	8.32443e-27	1	189
Cd302	OK	negbinomial.size	1.74896e-27	8.99153e-27	1	138
Qrfp	OK	negbinomial.size	2.01995e-27	1.03729e-26	1	48
Gm11808	OK	negbinomial.size	2.10712e-27	1.08083e-26	1	1033
Syne2	OK	negbinomial.size	2.1343e-27	1.09436e-26	1	886
P3h4	OK	negbinomial.size	2.28327e-27	1.16854e-26	1	89
Nampt	OK	negbinomial.size	2.61376e-27	1.33517e-26	1	496
Eif5b	OK	negbinomial.size	2.64666e-27	1.35146e-26	1	1771
Cyp39a1	OK	negbinomial.size	2.88981e-27	1.47396e-26	1	193
Ddi2	OK	negbinomial.size	3.27073e-27	1.66513e-26	1	791
Pawr	OK	negbinomial.size	3.28918e-27	1.6739e-26	1	99
Copz2	OK	negbinomial.size	3.42896e-27	1.74373e-26	1	142
Cnp	OK	negbinomial.size	3.48208e-27	1.77008e-26	1	191
Zfp219	OK	negbinomial.size	3.56905e-27	1.81361e-26	1	364
Ap2b1	OK	negbinomial.size	3.71767e-27	1.88843e-26	1	959
Ndst1	OK	negbinomial.size	4.23478e-27	2.14789e-26	1	192
Plk5	OK	negbinomial.size	4.30801e-27	2.18422e-26	1	99
Eif4b	OK	negbinomial.size	4.56549e-27	2.31217e-26	1	1092
Btbd11	OK	negbinomial.size	4.98561e-27	2.52118e-26	1	64
Abl1	OK	negbinomial.size	5.10823e-27	2.58127e-26	1	302
Pnkd	OK	negbinomial.size	5.32632e-27	2.68848e-26	1	504
Pkp4	OK	negbinomial.size	5.79082e-27	2.92077e-26	1	567
Smad7	OK	negbinomial.size	6.12408e-27	3.08656e-26	1	127
Hspg2	OK	negbinomial.size	6.81157e-27	3.42925e-26	1	136
Trip6	OK	negbinomial.size	6.83483e-27	3.43968e-26	1	146
Srsf11	OK	negbinomial.size	7.28574e-27	3.6639e-26	1	1642
Tpt1	OK	negbinomial.size	7.53103e-27	3.78585e-26	1	5035
Serpinb1b	OK	negbinomial.size	7.56156e-27	3.79979e-26	1	53
4833423E24Rik	OK	negbinomial.size	7.99036e-27	4.0123e-26	1	49
Hexb	OK	negbinomial.size	8.49921e-27	4.26152e-26	1	407
Klf9	OK	negbinomial.size	8.69001e-27	4.35237e-26	1	244
Adrbk2	OK	negbinomial.size	8.93959e-27	4.47572e-26	1	133
Tspan12	OK	negbinomial.size	1.31575e-26	6.54887e-26	1	284
Cux1	OK	negbinomial.size	2.43507e-26	1.20276e-25	1	844
C3	OK	negbinomial.size	2.52916e-26	1.24878e-25	1	98
Mdm4	OK	negbinomial.size	2.57339e-26	1.26969e-25	1	770
Gm20186	OK	negbinomial.size	2.89111e-26	1.42335e-25	1	307
Vangl1	OK	negbinomial.size	3.05243e-26	1.5006e-25	1	91
Fdx1	OK	negbinomial.size	3.22378e-26	1.58369e-25	1	603
Kazald1	OK	negbinomial.size	3.28492e-26	1.61315e-25	1	117
Khsrp	OK	negbinomial.size	3.74236e-26	1.83051e-25	1	539
2010007H06Rik	OK	negbinomial.size	4.13521e-26	2.01758e-25	1	164
Mest	OK	negbinomial.size	4.96591e-26	2.41509e-25	1	112
Mgat4a	OK	negbinomial.size	5.40749e-26	2.62796e-25	1	114
Cxcl14	OK	negbinomial.size	6.2095e-26	3.00804e-25	1	87
Nktr	OK	negbinomial.size	7.85488e-26	3.79025e-25	1	1342
Rps13	OK	negbinomial.size	8.8224e-26	4.25409e-25	1	4673
Hcar2	OK	negbinomial.size	1.2284e-25	5.9086e-25	1	53
Fbln2	OK	negbinomial.size	1.40923e-25	6.76162e-25	1	67
Cbx1	OK	negbinomial.size	1.52502e-25	7.31202e-25	1	1790
Phf14	OK	negbinomial.size	1.64909e-25	7.90132e-25	1	659
Phactr4	OK	negbinomial.size	2.11778e-25	1.01114e-24	1	305
Dusp6	OK	negbinomial.size	2.13186e-25	1.0175e-24	1	185
Arl5b	OK	negbinomial.size	2.6146e-25	1.24528e-24	1	442
Fzd1	OK	negbinomial.size	2.9136e-25	1.38526e-24	1	114
Il13ra1	OK	negbinomial.size	4.35895e-25	2.05733e-24	1	179
Kif1c	OK	negbinomial.size	4.518e-25	2.13092e-24	1	149
Hmga1	OK	negbinomial.size	4.92093e-25	2.31775e-24	1	218
Spats2l	OK	negbinomial.size	4.92542e-25	2.31906e-24	1	93
Rbm25	OK	negbinomial.size	4.94286e-25	2.32646e-24	1	2278
Litaf	OK	negbinomial.size	5.1538e-25	2.42323e-24	1	200
Nfe2l3	OK	negbinomial.size	5.52988e-25	2.59736e-24	1	162
Ngfr	OK	negbinomial.size	6.72976e-25	3.14897e-24	1	58
Stard5	OK	negbinomial.size	7.37114e-25	3.44434e-24	1	109
Erbb2	OK	negbinomial.size	8.54245e-25	3.98072e-24	1	114
Taf1d	OK	negbinomial.size	8.58006e-25	3.99687e-24	1	463
Psmg4	OK	negbinomial.size	8.5926e-25	4.00134e-24	1	550
Rapgef3	OK	negbinomial.size	8.74507e-25	4.06955e-24	1	81
Efnb1	OK	negbinomial.size	9.2616e-25	4.3055e-24	1	119
Fosl2	OK	negbinomial.size	9.31495e-25	4.32882e-24	1	112
Ifi202b	OK	negbinomial.size	1.03782e-24	4.81472e-24	1	37
Sbspon	OK	negbinomial.size	1.15913e-24	5.36284e-24	1	45
Sobp	OK	negbinomial.size	1.29507e-24	5.98364e-24	1	370
Tmc4	OK	negbinomial.size	1.58365e-24	7.30455e-24	1	135
Cyfip1	OK	negbinomial.size	1.8886e-24	8.68462e-24	1	234
Hadh	OK	negbinomial.size	1.92405e-24	8.84166e-24	1	281
Plscr1	OK	negbinomial.size	1.94895e-24	8.95306e-24	1	238
Tcf12	OK	negbinomial.size	1.95193e-24	8.96373e-24	1	942
Ndrg1	OK	negbinomial.size	1.98118e-24	9.08577e-24	1	215
Ptgfrn	OK	negbinomial.size	2.10665e-24	9.64812e-24	1	96
Acot7	OK	negbinomial.size	2.1762e-24	9.95994e-24	1	129
Gns	OK	negbinomial.size	2.36941e-24	1.08296e-23	1	508
Fxyd1	OK	negbinomial.size	2.7915e-24	1.27289e-23	1	96
Slc44a1	OK	negbinomial.size	3.0151e-24	1.373e-23	1	494
Cdh3	OK	negbinomial.size	3.27473e-24	1.48924e-23	1	100
Mpdz	OK	negbinomial.size	3.88283e-24	1.76107e-23	1	86
Smc1a	OK	negbinomial.size	3.99739e-24	1.81182e-23	1	1081
Ugdh	OK	negbinomial.size	4.41737e-24	1.99751e-23	1	870
Serhl	OK	negbinomial.size	4.84657e-24	2.18796e-23	1	138
Adamdec1	OK	negbinomial.size	5.01399e-24	2.26203e-23	1	221
Kcnj13	OK	negbinomial.size	5.23896e-24	2.3604e-23	1	118
Ces2b	OK	negbinomial.size	5.26276e-24	2.37033e-23	1	46
Lgi2	OK	negbinomial.size	5.71804e-24	2.57113e-23	1	60
Tcf7l1	OK	negbinomial.size	6.17929e-24	2.77212e-23	1	81
Nek7	OK	negbinomial.size	6.92065e-24	3.09958e-23	1	781
Slc26a2	OK	negbinomial.size	7.84612e-24	3.5083e-23	1	194
Cracr2b	OK	negbinomial.size	8.61976e-24	3.8479e-23	1	178
Smg1	OK	negbinomial.size	8.82192e-24	3.93685e-23	1	780
Eml4	OK	negbinomial.size	9.99599e-24	4.4491e-23	1	448
Rac1	OK	negbinomial.size	1.28802e-23	5.71597e-23	1	1148
Tmco1	OK	negbinomial.size	1.36118e-23	6.03672e-23	1	890
Lman1	OK	negbinomial.size	1.3728e-23	6.08627e-23	1	460
Spred2	OK	negbinomial.size	1.43251e-23	6.34477e-23	1	430
Gcat	OK	negbinomial.size	1.44172e-23	6.38347e-23	1	268
Cdc42ep2	OK	negbinomial.size	1.51568e-23	6.70658e-23	1	141
Pard6g	OK	negbinomial.size	2.05611e-23	9.05368e-23	1	109
Prdm11	OK	negbinomial.size	2.08375e-23	9.16946e-23	1	95
Rab34	OK	negbinomial.size	2.11781e-23	9.3103e-23	1	96
Srebf2	OK	negbinomial.size	2.25604e-23	9.89876e-23	1	513
Akr1a1	OK	negbinomial.size	2.31179e-23	1.01401e-22	1	2610
Mlec	OK	negbinomial.size	2.32796e-23	1.02044e-22	1	378
Icam1	OK	negbinomial.size	2.34114e-23	1.02589e-22	1	79
Nop58	OK	negbinomial.size	2.78039e-23	1.21524e-22	1	724
Creb3l2	OK	negbinomial.size	3.13275e-23	1.36704e-22	1	370
Cdca7l	OK	negbinomial.size	3.32323e-23	1.44877e-22	1	125
Arl5a	OK	negbinomial.size	3.50168e-23	1.5251e-22	1	405
Gm15867	OK	negbinomial.size	3.854e-23	1.67801e-22	1	63
Alas1	OK	negbinomial.size	3.97085e-23	1.72778e-22	1	404
Osgin1	OK	negbinomial.size	4.0129e-23	1.7444e-22	1	96
B3galt2	OK	negbinomial.size	4.15863e-23	1.80659e-22	1	69
Cobl	OK	negbinomial.size	4.22768e-23	1.83542e-22	1	152
Tff2	OK	negbinomial.size	4.61058e-23	1.99973e-22	1	69
Bambi	OK	negbinomial.size	5.69575e-23	2.45799e-22	1	90
Azgp1	OK	negbinomial.size	7.19102e-23	3.09132e-22	1	96
Rcn2	OK	negbinomial.size	7.63372e-23	3.27956e-22	1	626
Efna1	OK	negbinomial.size	7.69892e-23	3.30548e-22	1	68
Dtymk	OK	negbinomial.size	9.61478e-23	4.11763e-22	1	628
Gm10415	OK	negbinomial.size	9.67009e-23	4.14001e-22	1	41
Ivd	OK	negbinomial.size	1.06315e-22	4.54445e-22	1	295
Fndc3b	OK	negbinomial.size	1.07258e-22	4.58333e-22	1	277
Echs1	OK	negbinomial.size	1.08623e-22	4.63873e-22	1	882
Rpl9-ps6	OK	negbinomial.size	1.13259e-22	4.83368e-22	1	827
Acsf2	OK	negbinomial.size	1.15533e-22	4.92918e-22	1	114
Qk	OK	negbinomial.size	1.24353e-22	5.30382e-22	1	593
Eif3m	OK	negbinomial.size	1.25287e-22	5.34198e-22	1	1751
Elovl5	OK	negbinomial.size	1.49713e-22	6.37545e-22	1	212
Idh2	OK	negbinomial.size	1.9085e-22	8.10697e-22	1	469
Gm10020	OK	negbinomial.size	1.97034e-22	8.36704e-22	1	649
Nudt4	OK	negbinomial.size	2.02469e-22	8.59243e-22	1	623
Otud1	OK	negbinomial.size	2.36168e-22	1.00069e-21	1	284
Tceal1	OK	negbinomial.size	2.37884e-22	1.00765e-21	1	136
Zc3h7b	OK	negbinomial.size	2.56182e-22	1.08415e-21	1	546
Galnt18	OK	negbinomial.size	2.74878e-22	1.16146e-21	1	96
Dmrt3	OK	negbinomial.size	2.91725e-22	1.23226e-21	1	154
Anpep	OK	negbinomial.size	2.98708e-22	1.2598e-21	1	91
2210013O21Rik	OK	negbinomial.size	3.06602e-22	1.29269e-21	1	355
Sema3c	OK	negbinomial.size	3.36626e-22	1.41621e-21	1	49
Arhgap25	OK	negbinomial.size	3.37922e-22	1.42122e-21	1	66
Mthfd1	OK	negbinomial.size	3.5495e-22	1.49191e-21	1	299
Rap2b	OK	negbinomial.size	3.59966e-22	1.51206e-21	1	217
Naa15	OK	negbinomial.size	4.92409e-22	2.05695e-21	1	687
Tyms	OK	negbinomial.size	5.51057e-22	2.2963e-21	1	190
Ostc	OK	negbinomial.size	5.81307e-22	2.42013e-21	1	946
Cth	OK	negbinomial.size	5.87201e-22	2.4436e-21	1	116
Pum1	OK	negbinomial.size	5.87305e-22	2.4436e-21	1	1215
Scnn1a	OK	negbinomial.size	6.28005e-22	2.61054e-21	1	249
Dok1	OK	negbinomial.size	6.32817e-22	2.62974e-21	1	96
Eif5	OK	negbinomial.size	6.57375e-22	2.73013e-21	1	1313
Eya4	OK	negbinomial.size	8.62448e-22	3.5633e-21	1	118
Phxr4	OK	negbinomial.size	9.05247e-22	3.73559e-21	1	254
Airn	OK	negbinomial.size	9.09297e-22	3.75116e-21	1	85
Gprc5b	OK	negbinomial.size	9.16483e-22	3.77966e-21	1	92
Trim12c	OK	negbinomial.size	9.70827e-22	4.00256e-21	1	109
Fam193a	OK	negbinomial.size	1.03516e-21	4.2639e-21	1	554
Chst9	OK	negbinomial.size	1.06481e-21	4.38073e-21	1	50
Hmgcr	OK	negbinomial.size	1.26331e-21	5.18482e-21	1	655
Sik1	OK	negbinomial.size	1.3552e-21	5.55695e-21	1	116
Fndc1	OK	negbinomial.size	1.50489e-21	6.15588e-21	1	81
Phkb	OK	negbinomial.size	1.61137e-21	6.58152e-21	1	328
Ythdf2	OK	negbinomial.size	1.62456e-21	6.63141e-21	1	533
Rreb1	OK	negbinomial.size	1.76831e-21	7.20954e-21	1	116
Spint1	OK	negbinomial.size	1.83467e-21	7.47561e-21	1	184
Plekha5	OK	negbinomial.size	2.02094e-21	8.21983e-21	1	477
Iqgap2	OK	negbinomial.size	2.05881e-21	8.37132e-21	1	298
Tspan4	OK	negbinomial.size	2.15669e-21	8.76146e-21	1	95
Ptgs1	OK	negbinomial.size	2.28985e-21	9.28854e-21	1	96
Rpl13-ps3	OK	negbinomial.size	2.30004e-21	9.3271e-21	1	373
Lyar	OK	negbinomial.size	2.3934e-21	9.697e-21	1	600
Papln	OK	negbinomial.size	2.44867e-21	9.90912e-21	1	36
Upf2	OK	negbinomial.size	2.7269e-21	1.10088e-20	1	779
Abcg1	OK	negbinomial.size	2.95608e-21	1.19199e-20	1	818
Marveld1	OK	negbinomial.size	3.26416e-21	1.3131e-20	1	70
Sh2b3	OK	negbinomial.size	3.69407e-21	1.48297e-20	1	107
Hmga2	OK	negbinomial.size	3.87892e-21	1.55626e-20	1	119
Ptger2	OK	negbinomial.size	4.05378e-21	1.62594e-20	1	93
Akr1b10	OK	negbinomial.size	4.24039e-21	1.70028e-20	1	68
Acadsb	OK	negbinomial.size	4.31093e-21	1.72755e-20	1	322
Pank1	OK	negbinomial.size	4.53375e-21	1.81417e-20	1	148
Cers2	OK	negbinomial.size	4.61283e-21	1.84418e-20	1	180
Rif1	OK	negbinomial.size	4.90004e-21	1.95728e-20	1	747
Rbbp7	OK	negbinomial.size	4.92951e-21	1.96847e-20	1	919
Pcp4	OK	negbinomial.size	5.2475e-21	2.093e-20	1	66
Rassf9	OK	negbinomial.size	6.18392e-21	2.46216e-20	1	75
Dapk2	OK	negbinomial.size	6.60196e-21	2.62399e-20	1	71
Prpf38b	OK	negbinomial.size	6.66076e-21	2.64581e-20	1	1301
Hyal2	OK	negbinomial.size	7.17609e-21	2.84221e-20	1	110
Fhdc1	OK	negbinomial.size	7.38564e-21	2.9218e-20	1	91
Slc16a12	OK	negbinomial.size	7.40388e-21	2.92816e-20	1	34
Capn1	OK	negbinomial.size	8.28212e-21	3.27169e-20	1	132
Lrig3	OK	negbinomial.size	8.70952e-21	3.43753e-20	1	52
Rps6ka1	OK	negbinomial.size	1.00813e-20	3.97317e-20	1	107
Frmpd4	OK	negbinomial.size	1.09127e-20	4.28964e-20	1	68
Col4a2	OK	negbinomial.size	1.10065e-20	4.3253e-20	1	69
Gstm7	OK	negbinomial.size	1.28104e-20	5.02833e-20	1	110
Lamb2	OK	negbinomial.size	1.29253e-20	5.07197e-20	1	87
Gm7676	OK	negbinomial.size	1.3126e-20	5.14628e-20	1	57
Plxna2	OK	negbinomial.size	1.31223e-20	5.14628e-20	1	124
Bnip3l	OK	negbinomial.size	1.35995e-20	5.32734e-20	1	1176
Ctnnb1	OK	negbinomial.size	1.39697e-20	5.47074e-20	1	2000
Fam19a5	OK	negbinomial.size	1.42493e-20	5.57704e-20	1	66
Serbp1	OK	negbinomial.size	1.50161e-20	5.87041e-20	1	3023
Mpp6	OK	negbinomial.size	1.69916e-20	6.62937e-20	1	209
Sertad4	OK	negbinomial.size	2.26243e-20	8.80171e-20	1	107
Gm684	OK	negbinomial.size	2.58773e-20	1.00414e-19	1	103
Plekhg6	OK	negbinomial.size	2.98685e-20	1.15736e-19	1	65
Ptprd	OK	negbinomial.size	3.41139e-20	1.31923e-19	1	162
Gk	OK	negbinomial.size	3.46671e-20	1.33986e-19	1	171
Atp6v1b1	OK	negbinomial.size	3.58002e-20	1.38248e-19	1	153
Rai1	OK	negbinomial.size	3.81195e-20	1.47079e-19	1	120
F2rl1	OK	negbinomial.size	3.89726e-20	1.50328e-19	1	340
Nbeal1	OK	negbinomial.size	3.93661e-20	1.51802e-19	1	816
Pak2	OK	negbinomial.size	4.34586e-20	1.67394e-19	1	867
Sirpa	OK	negbinomial.size	4.58904e-20	1.76411e-19	1	204
Tsen34	OK	negbinomial.size	4.73245e-20	1.81821e-19	1	761
Ppfibp2	OK	negbinomial.size	4.73563e-20	1.81892e-19	1	87
Gdpd2	OK	negbinomial.size	5.71663e-20	2.19138e-19	1	42
Limk2	OK	negbinomial.size	5.8044e-20	2.22439e-19	1	743
Ermp1	OK	negbinomial.size	6.51873e-20	2.49322e-19	1	357
Atf7ip	OK	negbinomial.size	8.03223e-20	3.06433e-19	1	924
Hipk3	OK	negbinomial.size	9.27022e-20	3.52574e-19	1	390
Bod1l	OK	negbinomial.size	1.06419e-19	4.03839e-19	1	1223
Plod2	OK	negbinomial.size	1.09508e-19	4.15445e-19	1	152
Cd2ap	OK	negbinomial.size	1.16509e-19	4.41638e-19	1	850
Plk2	OK	negbinomial.size	1.22108e-19	4.62215e-19	1	103
Arhgap32	OK	negbinomial.size	1.26662e-19	4.7892e-19	1	599
Rhbdf1	OK	negbinomial.size	1.26947e-19	4.79862e-19	1	70
Fam214b	OK	negbinomial.size	1.3011e-19	4.91684e-19	1	151
Pycard	OK	negbinomial.size	1.45174e-19	5.47241e-19	1	281
Epb41l5	OK	negbinomial.size	1.45353e-19	5.47764e-19	1	329
Afap1l1	OK	negbinomial.size	1.47924e-19	5.57142e-19	1	51
Epn3	OK	negbinomial.size	1.48957e-19	5.60569e-19	1	111
Eif3j1	OK	negbinomial.size	1.80136e-19	6.7566e-19	1	811
Impad1	OK	negbinomial.size	1.94169e-19	7.26692e-19	1	835
Stxbp2	OK	negbinomial.size	2.15754e-19	8.05922e-19	1	177
Mr1	OK	negbinomial.size	2.20377e-19	8.22962e-19	1	102
Rbbp8	OK	negbinomial.size	2.41906e-19	9.0212e-19	1	395
Nmt1	OK	negbinomial.size	2.69623e-19	1.00328e-18	1	546
Cxadr	OK	negbinomial.size	3.32952e-19	1.23521e-18	1	1133
Art4	OK	negbinomial.size	3.44388e-19	1.27625e-18	1	56
Samd5	OK	negbinomial.size	3.48762e-19	1.2921e-18	1	50
Ubap2	OK	negbinomial.size	3.7398e-19	1.3844e-18	1	602
Rps27l	OK	negbinomial.size	3.78024e-19	1.39899e-18	1	2893
Pdcd6ip	OK	negbinomial.size	4.12475e-19	1.52358e-18	1	876
Cpt1a	OK	negbinomial.size	4.3594e-19	1.60851e-18	1	123
Rapgefl1	OK	negbinomial.size	4.62825e-19	1.70539e-18	1	78
Tom1l1	OK	negbinomial.size	5.04738e-19	1.85781e-18	1	526
Fam212a	OK	negbinomial.size	5.28058e-19	1.94207e-18	1	72
Lrrc58	OK	negbinomial.size	5.35028e-19	1.96611e-18	1	797
Igf2bp2	OK	negbinomial.size	5.37445e-19	1.97446e-18	1	222
Sp1	OK	negbinomial.size	5.53546e-19	2.03141e-18	1	604
Chst15	OK	negbinomial.size	6.50974e-19	2.38124e-18	1	98
Dmrta2os	OK	negbinomial.size	6.62261e-19	2.42187e-18	1	129
Abhd14b	OK	negbinomial.size	6.63306e-19	2.42505e-18	1	399
Srd5a1	OK	negbinomial.size	6.64056e-19	2.42713e-18	1	355
Arhgef40	OK	negbinomial.size	6.89937e-19	2.51784e-18	1	73
Plp2	OK	negbinomial.size	7.17051e-19	2.6124e-18	1	210
2610528J11Rik	OK	negbinomial.size	7.64711e-19	2.7838e-18	1	61
Zfp148	OK	negbinomial.size	7.95312e-19	2.89365e-18	1	819
Itga3	OK	negbinomial.size	9.19208e-19	3.33283e-18	1	195
Tgfa	OK	negbinomial.size	9.41993e-19	3.41272e-18	1	113
Kcnk1	OK	negbinomial.size	1.14461e-18	4.12916e-18	1	119
Cdk6	OK	negbinomial.size	1.15e-18	4.1464e-18	1	449
Cers6	OK	negbinomial.size	1.15265e-18	4.15484e-18	1	102
Plscr3	OK	negbinomial.size	1.30318e-18	4.69249e-18	1	277
Kank1	OK	negbinomial.size	1.35501e-18	4.87523e-18	1	76
Prkab1	OK	negbinomial.size	1.36573e-18	4.9125e-18	1	115
Pthlh	OK	negbinomial.size	1.38498e-18	4.98044e-18	1	61
Ext1	OK	negbinomial.size	1.41836e-18	5.0991e-18	1	196
Fcho2	OK	negbinomial.size	1.45331e-18	5.222e-18	1	457
Artn	OK	negbinomial.size	1.4854e-18	5.33025e-18	1	53
Smurf2	OK	negbinomial.size	1.48515e-18	5.33025e-18	1	300
Ascl2	OK	negbinomial.size	1.50194e-18	5.38536e-18	1	47
Mknk2	OK	negbinomial.size	1.65143e-18	5.912e-18	1	359
Pgrmc2	OK	negbinomial.size	1.9761e-18	7.05386e-18	1	281
Mal2	OK	negbinomial.size	2.07478e-18	7.39387e-18	1	92
Otx2os1	OK	negbinomial.size	2.24574e-18	7.9912e-18	1	92
Llph	OK	negbinomial.size	2.39316e-18	8.50687e-18	1	1586
Ssh2	OK	negbinomial.size	2.62252e-18	9.31484e-18	1	974
Slc39a1	OK	negbinomial.size	3.27663e-18	1.16018e-17	1	225
Tmem238	OK	negbinomial.size	3.30594e-18	1.17025e-17	1	498
Tfdp2	OK	negbinomial.size	3.52585e-18	1.24777e-17	1	570
Sptssa	OK	negbinomial.size	4.02656e-18	1.42275e-17	1	1050
Ccng1	OK	negbinomial.size	4.32981e-18	1.52791e-17	1	551
Ehmt1	OK	negbinomial.size	4.46325e-18	1.57459e-17	1	589
Zfp703	OK	negbinomial.size	4.59167e-18	1.61948e-17	1	139
G2e3	OK	negbinomial.size	4.81984e-18	1.69863e-17	1	222
Matr3	OK	negbinomial.size	5.85113e-18	2.05356e-17	1	1381
Elovl1	OK	negbinomial.size	5.88846e-18	2.06613e-17	1	127
Arpp19	OK	negbinomial.size	6.3803e-18	2.23582e-17	1	1993
Gapvd1	OK	negbinomial.size	6.95864e-18	2.43597e-17	1	758
Pole4	OK	negbinomial.size	7.02754e-18	2.45946e-17	1	877
Rbpms	OK	negbinomial.size	7.19194e-18	2.5144e-17	1	132
Larp4	OK	negbinomial.size	7.19923e-18	2.5163e-17	1	503
Slc4a2	OK	negbinomial.size	8.52136e-18	2.96774e-17	1	471
Rgcc	OK	negbinomial.size	8.55992e-18	2.9804e-17	1	81
Dnajc21	OK	negbinomial.size	8.57761e-18	2.98504e-17	1	728
Tnks1bp1	OK	negbinomial.size	9.28312e-18	3.22642e-17	1	153
Sik2	OK	negbinomial.size	9.332e-18	3.24258e-17	1	134
Epha3	OK	negbinomial.size	1.0283e-17	3.56755e-17	1	56
Ctnnd1	OK	negbinomial.size	1.094e-17	3.79065e-17	1	636
Hnf4g	OK	negbinomial.size	1.11024e-17	3.84495e-17	1	38
Ctnna1	OK	negbinomial.size	1.13656e-17	3.93313e-17	1	1310
Setd2	OK	negbinomial.size	1.16039e-17	4.01354e-17	1	778
Pbxip1	OK	negbinomial.size	1.18608e-17	4.10134e-17	1	330
Man2a1	OK	negbinomial.size	1.21804e-17	4.21079e-17	1	127
Tk1	OK	negbinomial.size	1.25629e-17	4.33641e-17	1	99
Man1a	OK	negbinomial.size	1.34205e-17	4.62536e-17	1	87
Igfbp7	OK	negbinomial.size	1.49344e-17	5.14064e-17	1	241
Reep3	OK	negbinomial.size	1.49516e-17	5.14524e-17	1	671
Tmem158	OK	negbinomial.size	1.64349e-17	5.6514e-17	1	97
Slc39a4	OK	negbinomial.size	1.75311e-17	6.01922e-17	1	43
Rnf217	OK	negbinomial.size	1.96307e-17	6.7299e-17	1	52
Stag1	OK	negbinomial.size	2.16123e-17	7.39804e-17	1	643
Col4a1	OK	negbinomial.size	2.33545e-17	7.97982e-17	1	69
Gas7	OK	negbinomial.size	2.39804e-17	8.18393e-17	1	85
Ctcf	OK	negbinomial.size	2.50821e-17	8.54917e-17	1	984
Stard4	OK	negbinomial.size	2.53015e-17	8.62178e-17	1	287
Zfp326	OK	negbinomial.size	2.56957e-17	8.75392e-17	1	691
Dennd2d	OK	negbinomial.size	2.82978e-17	9.62591e-17	1	88
Prkcdbp	OK	negbinomial.size	2.85783e-17	9.71732e-17	1	69
Runx2	OK	negbinomial.size	2.91361e-17	9.90365e-17	1	86
Ltbp1	OK	negbinomial.size	3.55307e-17	1.20291e-16	1	65
Rad50	OK	negbinomial.size	3.65724e-17	1.23787e-16	1	333
Decr1	OK	negbinomial.size	4.38149e-17	1.47969e-16	1	91
Dmd	OK	negbinomial.size	4.81702e-17	1.62435e-16	1	106
Arhgef10	OK	negbinomial.size	5.21306e-17	1.75529e-16	1	84
Dusp11	OK	negbinomial.size	5.32446e-17	1.79236e-16	1	1023
Oaf	OK	negbinomial.size	5.34536e-17	1.79895e-16	1	66
Ltbp3	OK	negbinomial.size	5.58183e-17	1.87714e-16	1	139
Agpat2	OK	negbinomial.size	5.93874e-17	1.99519e-16	1	96
Sdr16c5	OK	negbinomial.size	6.08055e-17	2.04132e-16	1	47
Srrm2	OK	negbinomial.size	6.29054e-17	2.11077e-16	1	2872
Limd1	OK	negbinomial.size	6.4739e-17	2.17069e-16	1	334
Dhrs4	OK	negbinomial.size	6.83098e-17	2.28872e-16	1	321
Slc14a1	OK	negbinomial.size	7.23594e-17	2.42023e-16	1	77
Bcl2l12	OK	negbinomial.size	7.54043e-17	2.52083e-16	1	140
Gatsl3	OK	negbinomial.size	7.63011e-17	2.55019e-16	1	49
Rapgef6	OK	negbinomial.size	8.5368e-17	2.85042e-16	1	451
Nid2	OK	negbinomial.size	8.6418e-17	2.88477e-16	1	43
Rabep2	OK	negbinomial.size	8.87877e-17	2.96315e-16	1	208
Prom2	OK	negbinomial.size	9.55117e-17	3.18521e-16	1	51
Rnd3	OK	negbinomial.size	9.56673e-17	3.18961e-16	1	123
Slc20a2	OK	negbinomial.size	9.64889e-17	3.21622e-16	1	193
Sema6d	OK	negbinomial.size	9.78678e-17	3.26138e-16	1	129
Ano1	OK	negbinomial.size	9.98226e-17	3.32489e-16	1	84
Cdc73	OK	negbinomial.size	1.00813e-16	3.35707e-16	1	687
Lfng	OK	negbinomial.size	1.03e-16	3.42735e-16	1	87
St5	OK	negbinomial.size	1.11079e-16	3.69078e-16	1	378
Eln	OK	negbinomial.size	1.13643e-16	3.77506e-16	1	60
Sspn	OK	negbinomial.size	1.21915e-16	4.04587e-16	1	89
Pdcd11	OK	negbinomial.size	1.27265e-16	4.22014e-16	1	336
Vat1	OK	negbinomial.size	1.37507e-16	4.55441e-16	1	158
Zswim6	OK	negbinomial.size	1.38892e-16	4.59358e-16	1	420
Synpr	OK	negbinomial.size	1.47194e-16	4.86106e-16	1	34
Phc3	OK	negbinomial.size	1.53259e-16	5.05521e-16	1	458
Lrp6	OK	negbinomial.size	1.6448e-16	5.41874e-16	1	716
Dag1	OK	negbinomial.size	1.67577e-16	5.51944e-16	1	520
Cstf2	OK	negbinomial.size	1.69796e-16	5.58981e-16	1	447
Ccdc8	OK	negbinomial.size	1.72187e-16	5.66578e-16	1	96
Tgfb1	OK	negbinomial.size	1.73688e-16	5.7138e-16	1	123
Pld1	OK	negbinomial.size	1.8281e-16	6.00372e-16	1	43
Rai14	OK	negbinomial.size	1.82795e-16	6.00372e-16	1	108
Nmb	OK	negbinomial.size	1.86853e-16	6.13204e-16	1	121
Hddc2	OK	negbinomial.size	1.89717e-16	6.22152e-16	1	198
Slc44a3	OK	negbinomial.size	2.24227e-16	7.33556e-16	1	113
Man1a2	OK	negbinomial.size	2.30475e-16	7.53451e-16	1	729
Slc25a36	OK	negbinomial.size	2.33574e-16	7.63399e-16	1	427
Eny2	OK	negbinomial.size	2.62035e-16	8.55388e-16	1	1080
Eif4ebp1	OK	negbinomial.size	2.73203e-16	8.90776e-16	1	288
Ntn4	OK	negbinomial.size	2.80674e-16	9.13822e-16	1	62
Nab2	OK	negbinomial.size	2.81248e-16	9.1547e-16	1	58
Zfp395	OK	negbinomial.size	2.85664e-16	9.29401e-16	1	117
Trim8	OK	negbinomial.size	2.87652e-16	9.35644e-16	1	327
Adora2b	OK	negbinomial.size	2.99891e-16	9.75218e-16	1	47
Tbl1x	OK	negbinomial.size	3.31877e-16	1.07846e-15	1	723
Smad6	OK	negbinomial.size	3.79407e-16	1.22997e-15	1	75
Arhgef16	OK	negbinomial.size	3.95357e-16	1.28076e-15	1	84
Wipf1	OK	negbinomial.size	4.2299e-16	1.36865e-15	1	106
Lypla1	OK	negbinomial.size	4.43733e-16	1.43474e-15	1	353
Ankrd17	OK	negbinomial.size	5.27207e-16	1.7002e-15	1	1000
Kif21a	OK	negbinomial.size	5.44797e-16	1.75567e-15	1	1120
Lppos	OK	negbinomial.size	5.58312e-16	1.79837e-15	1	103
Gab1	OK	negbinomial.size	5.67089e-16	1.82578e-15	1	109
Kctd15	OK	negbinomial.size	6.20242e-16	1.99266e-15	1	90
Lss	OK	negbinomial.size	6.25196e-16	2.00715e-15	1	248
Mta2	OK	negbinomial.size	6.35043e-16	2.03732e-15	1	388
Hpn	OK	negbinomial.size	6.84393e-16	2.19306e-15	1	67
Eif2s1	OK	negbinomial.size	7.27109e-16	2.3261e-15	1	573
Rhbdl2	OK	negbinomial.size	7.48475e-16	2.39164e-15	1	59
Rhou	OK	negbinomial.size	7.77122e-16	2.48084e-15	1	206
Zcchc6	OK	negbinomial.size	7.79123e-16	2.48664e-15	1	499
Il6ra	OK	negbinomial.size	8.20156e-16	2.61453e-15	1	65
Wisp1	OK	negbinomial.size	8.25964e-16	2.63147e-15	1	34
Tnfrsf12a	OK	negbinomial.size	8.28218e-16	2.63776e-15	1	175
Hnrnpr	OK	negbinomial.size	8.48334e-16	2.69867e-15	1	2214
Reep4	OK	negbinomial.size	8.77111e-16	2.78811e-15	1	182
Lefty1	OK	negbinomial.size	8.93018e-16	2.83749e-15	1	50
Cdkn2c	OK	negbinomial.size	9.32189e-16	2.95949e-15	1	182
Phykpl	OK	negbinomial.size	1.01769e-15	3.22759e-15	1	192
Ampd3	OK	negbinomial.size	1.06222e-15	3.36648e-15	1	102
Nucb2	OK	negbinomial.size	1.07493e-15	3.40595e-15	1	542
Fzd8	OK	negbinomial.size	1.1071e-15	3.50625e-15	1	89
Cldn11	OK	negbinomial.size	1.11069e-15	3.51681e-15	1	47
Fam161a	OK	negbinomial.size	1.11665e-15	3.53485e-15	1	179
Ppp2r1b	OK	negbinomial.size	1.22204e-15	3.85858e-15	1	80
Cpne2	OK	negbinomial.size	1.23237e-15	3.88849e-15	1	72
Knop1	OK	negbinomial.size	1.23784e-15	3.90484e-15	1	911
Fbxo11	OK	negbinomial.size	1.32802e-15	4.18737e-15	1	775
Zranb3	OK	negbinomial.size	1.34893e-15	4.25233e-15	1	82
Acsl4	OK	negbinomial.size	1.35461e-15	4.26923e-15	1	503
Trip10	OK	negbinomial.size	1.3602e-15	4.28586e-15	1	74
Tmed9	OK	negbinomial.size	1.40944e-15	4.43588e-15	1	1507
Lpin1	OK	negbinomial.size	1.4219e-15	4.47404e-15	1	508
Naprt	OK	negbinomial.size	1.50041e-15	4.72e-15	1	99
Tmtc3	OK	negbinomial.size	1.72018e-15	5.39886e-15	1	349
Faap20	OK	negbinomial.size	1.7513e-15	5.49399e-15	1	317
Setx	OK	negbinomial.size	1.80411e-15	5.65834e-15	1	497
Lama3	OK	negbinomial.size	1.86336e-15	5.84012e-15	1	62
Tnfrsf18	OK	negbinomial.size	1.92703e-15	6.03274e-15	1	42
Tmem184a	OK	negbinomial.size	2.09526e-15	6.54583e-15	1	86
Vill	OK	negbinomial.size	2.10739e-15	6.5822e-15	1	49
Aff1	OK	negbinomial.size	2.1628e-15	6.75061e-15	1	381
Bcat2	OK	negbinomial.size	2.26468e-15	7.0589e-15	1	67
Fzd6	OK	negbinomial.size	2.33258e-15	7.26551e-15	1	127
Fbln1	OK	negbinomial.size	2.33411e-15	7.26862e-15	1	77
G3bp1	OK	negbinomial.size	2.35312e-15	7.32614e-15	1	1425
Tmem40	OK	negbinomial.size	2.35603e-15	7.33352e-15	1	53
Hyal1	OK	negbinomial.size	2.36771e-15	7.3682e-15	1	116
Sash1	OK	negbinomial.size	2.77341e-15	8.6051e-15	1	96
Kctd1	OK	negbinomial.size	2.90594e-15	9.0122e-15	1	244
Emb	OK	negbinomial.size	2.94826e-15	9.14135e-15	1	1582
Pcbd2	OK	negbinomial.size	3.13819e-15	9.71032e-15	1	455
Npr3	OK	negbinomial.size	3.32535e-15	1.02848e-14	1	75
Lrrc4c	OK	negbinomial.size	3.40478e-15	1.05256e-14	1	83
Micall1	OK	negbinomial.size	3.41577e-15	1.05572e-14	1	155
Neo1	OK	negbinomial.size	3.53953e-15	1.09322e-14	1	411
Gdpd5	OK	negbinomial.size	3.63282e-15	1.12127e-14	1	451
Ptprk	OK	negbinomial.size	3.81014e-15	1.17547e-14	1	99
N4bp2l2	OK	negbinomial.size	3.84554e-15	1.18612e-14	1	1235
Eea1	OK	negbinomial.size	3.86171e-15	1.19084e-14	1	341
Cdc25b	OK	negbinomial.size	3.86433e-15	1.19138e-14	1	120
Lamc2	OK	negbinomial.size	3.98619e-15	1.22811e-14	1	87
Slco3a1	OK	negbinomial.size	4.17412e-15	1.28456e-14	1	333
Dcaf17	OK	negbinomial.size	4.42685e-15	1.35956e-14	1	381
Cldn4	OK	negbinomial.size	4.49002e-15	1.37803e-14	1	62
Mboat7	OK	negbinomial.size	4.53431e-15	1.39131e-14	1	117
Ubap2l	OK	negbinomial.size	4.58679e-15	1.40709e-14	1	945
Capn2	OK	negbinomial.size	4.80185e-15	1.47041e-14	1	179
Scrg1	OK	negbinomial.size	5.02647e-15	1.53746e-14	1	53
Sema4a	OK	negbinomial.size	5.33313e-15	1.63016e-14	1	79
Cenpb	OK	negbinomial.size	5.53783e-15	1.69159e-14	1	915
Lzts2	OK	negbinomial.size	6.37611e-15	1.94285e-14	1	127
Pdlim5	OK	negbinomial.size	6.61103e-15	2.01217e-14	1	224
Dtnbp1	OK	negbinomial.size	6.72577e-15	2.04618e-14	1	145
Gna14	OK	negbinomial.size	6.8432e-15	2.08098e-14	1	61
Fzd5	OK	negbinomial.size	6.97351e-15	2.12013e-14	1	61
Ube2q1	OK	negbinomial.size	6.9751e-15	2.12014e-14	1	606
Rhod	OK	negbinomial.size	7.10957e-15	2.16005e-14	1	109
Hsd17b6	OK	negbinomial.size	7.4701e-15	2.26654e-14	1	54
Slc11a2	OK	negbinomial.size	7.69157e-15	2.32958e-14	1	429
Athl1	OK	negbinomial.size	7.92256e-15	2.39794e-14	1	72
Mybbp1a	OK	negbinomial.size	8.29273e-15	2.50886e-14	1	366
Lims1	OK	negbinomial.size	9.50962e-15	2.86999e-14	1	475
Itpr3	OK	negbinomial.size	9.54552e-15	2.88018e-14	1	101
Plch2	OK	negbinomial.size	1.03197e-14	3.11032e-14	1	106
Srd5a2	OK	negbinomial.size	1.14192e-14	3.43638e-14	1	59
Wtip	OK	negbinomial.size	1.19357e-14	3.58944e-14	1	78
Shisa5	OK	negbinomial.size	1.23342e-14	3.70679e-14	1	528
Ep400	OK	negbinomial.size	1.31384e-14	3.94587e-14	1	700
Mdfic	OK	negbinomial.size	1.33511e-14	4.00886e-14	1	68
Slc1a1	OK	negbinomial.size	1.36448e-14	4.09343e-14	1	97
Anxa7	OK	negbinomial.size	1.37647e-14	4.12759e-14	1	720
Ube4a	OK	negbinomial.size	1.4209e-14	4.25988e-14	1	451
Rfc3	OK	negbinomial.size	1.44739e-14	4.33643e-14	1	336
Wwtr1	OK	negbinomial.size	1.45844e-14	4.36761e-14	1	96
Plin2	OK	negbinomial.size	1.51483e-14	4.53547e-14	1	151
Plekha2	OK	negbinomial.size	1.54447e-14	4.6222e-14	1	100
Pld5	OK	negbinomial.size	1.56991e-14	4.69625e-14	1	48
Dusp7	OK	negbinomial.size	1.60706e-14	4.80527e-14	1	93
Zyg11b	OK	negbinomial.size	1.71332e-14	5.11851e-14	1	408
Ces2e	OK	negbinomial.size	1.75249e-14	5.23322e-14	1	41
Tfap2a	OK	negbinomial.size	1.76287e-14	5.26306e-14	1	48
Sipa1l1	OK	negbinomial.size	1.77795e-14	5.3069e-14	1	262
Arhgap22	OK	negbinomial.size	2.15898e-14	6.42871e-14	1	61
Filip1l	OK	negbinomial.size	2.20988e-14	6.57451e-14	1	94
Efemp2	OK	negbinomial.size	2.2417e-14	6.66771e-14	1	86
Fcgrt	OK	negbinomial.size	2.33966e-14	6.95604e-14	1	133
Csf1	OK	negbinomial.size	2.46419e-14	7.31507e-14	1	64
Nbr1	OK	negbinomial.size	2.46602e-14	7.31892e-14	1	876
Gli3	OK	negbinomial.size	2.82968e-14	8.37444e-14	1	50
Esyt2	OK	negbinomial.size	3.3082e-14	9.76723e-14	1	364
Sipa1l3	OK	negbinomial.size	3.52582e-14	1.03984e-13	1	252
Adhfe1	OK	negbinomial.size	3.80036e-14	1.11936e-13	1	82
Ankib1	OK	negbinomial.size	3.9018e-14	1.14849e-13	1	313
Frk	OK	negbinomial.size	4.01049e-14	1.17997e-13	1	94
G3bp2	OK	negbinomial.size	4.34869e-14	1.27699e-13	1	1384
Secisbp2l	OK	negbinomial.size	4.39444e-14	1.28987e-13	1	419
Gdap10	OK	negbinomial.size	4.71954e-14	1.38379e-13	1	122
Gm26532	OK	negbinomial.size	4.78963e-14	1.40313e-13	1	84
Tpm2	OK	negbinomial.size	5.07938e-14	1.48609e-13	1	65
Sytl4	OK	negbinomial.size	5.14244e-14	1.50422e-13	1	54
Tmem5	OK	negbinomial.size	5.1516e-14	1.50658e-13	1	590
Bag3	OK	negbinomial.size	5.41159e-14	1.58091e-13	1	127
2310030G06Rik	OK	negbinomial.size	5.61972e-14	1.63995e-13	1	95
Rbm22	OK	negbinomial.size	5.63092e-14	1.64286e-13	1	590
Kdm2a	OK	negbinomial.size	5.75213e-14	1.67787e-13	1	664
Mesdc2	OK	negbinomial.size	6.12081e-14	1.78235e-13	1	317
Dnajc1	OK	negbinomial.size	6.46225e-14	1.87976e-13	1	368
Smagp	OK	negbinomial.size	6.58054e-14	1.91294e-13	1	76
Cd59a	OK	negbinomial.size	7.88932e-14	2.28363e-13	1	152
Rsu1	OK	negbinomial.size	8.53806e-14	2.46932e-13	1	420
Frrs1	OK	negbinomial.size	8.55339e-14	2.47322e-13	1	178
Aldh9a1	OK	negbinomial.size	8.63129e-14	2.49469e-13	1	105
Avl9	OK	negbinomial.size	9.01356e-14	2.60351e-13	1	649
Rere	OK	negbinomial.size	9.24848e-14	2.6708e-13	1	765
Paics	OK	negbinomial.size	9.33897e-14	2.69636e-13	1	823
Shmt1	OK	negbinomial.size	1.02924e-13	2.96784e-13	1	54
Tsc22d4	OK	negbinomial.size	1.03096e-13	2.97218e-13	1	667
Hsd17b7	OK	negbinomial.size	1.06011e-13	3.05558e-13	1	221
Zkscan1	OK	negbinomial.size	1.07576e-13	3.09937e-13	1	633
Ly75	OK	negbinomial.size	1.08174e-13	3.11461e-13	1	162
Scn1b	OK	negbinomial.size	1.0896e-13	3.13592e-13	1	59
Serf2	OK	negbinomial.size	1.14922e-13	3.3033e-13	1	3466
Slc25a42	OK	negbinomial.size	1.21253e-13	3.48233e-13	1	105
Mier1	OK	negbinomial.size	1.22755e-13	3.52474e-13	1	1132
Mapkapk2	OK	negbinomial.size	1.53629e-13	4.39452e-13	1	161
Xrcc5	OK	negbinomial.size	1.59108e-13	4.54742e-13	1	465
Aldh4a1	OK	negbinomial.size	1.6551e-13	4.72445e-13	1	212
Acox1	OK	negbinomial.size	1.68506e-13	4.80795e-13	1	420
Npepps	OK	negbinomial.size	1.82829e-13	5.2046e-13	1	897
Smc6	OK	negbinomial.size	1.84735e-13	5.25667e-13	1	1160
Lrrc26	OK	negbinomial.size	1.89154e-13	5.38014e-13	1	67
Lysmd2	OK	negbinomial.size	1.92642e-13	5.47592e-13	1	57
Flnb	OK	negbinomial.size	1.93487e-13	5.49763e-13	1	233
Lrrk1	OK	negbinomial.size	1.97082e-13	5.59745e-13	1	76
Vwa5a	OK	negbinomial.size	1.99818e-13	5.67279e-13	1	96
Slc25a13	OK	negbinomial.size	2.03053e-13	5.76343e-13	1	68
Cast	OK	negbinomial.size	2.09481e-13	5.93842e-13	1	80
Rab27a	OK	negbinomial.size	2.12192e-13	6.01404e-13	1	87
Armcx3	OK	negbinomial.size	2.17247e-13	6.156e-13	1	174
Actn1	OK	negbinomial.size	2.21256e-13	6.26439e-13	1	667
Socs3	OK	negbinomial.size	2.29723e-13	6.49869e-13	1	111
Srrm1	OK	negbinomial.size	2.38757e-13	6.75006e-13	1	1588
Mapk12	OK	negbinomial.size	2.41562e-13	6.82651e-13	1	132
Cdk12	OK	negbinomial.size	2.4165e-13	6.82757e-13	1	680
Arhgap24	OK	negbinomial.size	2.46912e-13	6.97336e-13	1	77
Cbr3	OK	negbinomial.size	2.52022e-13	7.11323e-13	1	43
Psmb9	OK	negbinomial.size	2.66868e-13	7.52444e-13	1	78
Stat6	OK	negbinomial.size	2.71122e-13	7.64281e-13	1	85
Eva1a	OK	negbinomial.size	2.75709e-13	7.76567e-13	1	45
Rangrf	OK	negbinomial.size	2.89403e-13	8.13958e-13	1	205
Ago1	OK	negbinomial.size	2.92266e-13	8.2167e-13	1	631
Tmem35	OK	negbinomial.size	2.97156e-13	8.35073e-13	1	79
Whsc1l1	OK	negbinomial.size	3.06059e-13	8.59559e-13	1	967
Arhgap23	OK	negbinomial.size	3.13483e-13	8.79863e-13	1	179
Aim1	OK	negbinomial.size	3.24949e-13	9.11104e-13	1	55
Btg3	OK	negbinomial.size	3.27255e-13	9.17192e-13	1	136
Slc9a2	OK	negbinomial.size	3.32576e-13	9.31911e-13	1	61
Wbp1l	OK	negbinomial.size	3.34682e-13	9.37621e-13	1	376
Ccnt1	OK	negbinomial.size	3.4274e-13	9.59798e-13	1	608
Gm26669	OK	negbinomial.size	3.62164e-13	1.01315e-12	1	56
Hpgds	OK	negbinomial.size	3.87749e-13	1.08389e-12	1	140
Prickle3	OK	negbinomial.size	3.8777e-13	1.08389e-12	1	70
Pold4	OK	negbinomial.size	3.98849e-13	1.11417e-12	1	335
Ephb6	OK	negbinomial.size	4.11862e-13	1.14934e-12	1	53
Slc35a1	OK	negbinomial.size	4.30644e-13	1.20003e-12	1	594
Stx16	OK	negbinomial.size	4.34204e-13	1.2097e-12	1	614
Calu	OK	negbinomial.size	4.39978e-13	1.22554e-12	1	327
Slc38a2	OK	negbinomial.size	4.50117e-13	1.25275e-12	1	731
Zmym4	OK	negbinomial.size	4.66912e-13	1.29896e-12	1	401
Myo9a	OK	negbinomial.size	4.84489e-13	1.34594e-12	1	379
Alpl	OK	negbinomial.size	4.88672e-13	1.35672e-12	1	62
Stat3	OK	negbinomial.size	5.11155e-13	1.41798e-12	1	490
Hexim1	OK	negbinomial.size	5.23841e-13	1.4517e-12	1	303
Zfp318	OK	negbinomial.size	5.53564e-13	1.53251e-12	1	517
Lats2	OK	negbinomial.size	5.54123e-13	1.53374e-12	1	77
Ssh3	OK	negbinomial.size	5.77056e-13	1.59624e-12	1	61
Ncor2	OK	negbinomial.size	6.04556e-13	1.66993e-12	1	393
Cept1	OK	negbinomial.size	6.17445e-13	1.7045e-12	1	570
Flrt3	OK	negbinomial.size	6.35924e-13	1.75408e-12	1	191
Mettl1	OK	negbinomial.size	6.4494e-13	1.77859e-12	1	217
Rbl2	OK	negbinomial.size	6.60633e-13	1.81965e-12	1	345
Anp32b	OK	negbinomial.size	6.90674e-13	1.90163e-12	1	2175
Gnmt	OK	negbinomial.size	7.15531e-13	1.96927e-12	1	57
Sfxn2	OK	negbinomial.size	7.68895e-13	2.11485e-12	1	109
Nme4	OK	negbinomial.size	7.8656e-13	2.16213e-12	1	132
Src	OK	negbinomial.size	8.11613e-13	2.22964e-12	1	246
Adrb2	OK	negbinomial.size	8.85543e-13	2.42881e-12	1	70
Aph1a	OK	negbinomial.size	9.23877e-13	2.53191e-12	1	436
Thsd4	OK	negbinomial.size	9.68761e-13	2.65086e-12	1	72
Dennd2c	OK	negbinomial.size	1.09395e-12	2.98536e-12	1	55
N6amt1	OK	negbinomial.size	1.14957e-12	3.13463e-12	1	431
Ggta1	OK	negbinomial.size	1.15903e-12	3.1598e-12	1	48
Arrdc4	OK	negbinomial.size	1.16912e-12	3.18665e-12	1	297
Rel	OK	negbinomial.size	1.26664e-12	3.44624e-12	1	115
Ccdc71	OK	negbinomial.size	1.30004e-12	3.53641e-12	1	97
Gmps	OK	negbinomial.size	1.30983e-12	3.56233e-12	1	613
Tbx1	OK	negbinomial.size	1.31501e-12	3.575e-12	1	37
Gm9930	OK	negbinomial.size	1.40566e-12	3.81761e-12	1	34
Rbl1	OK	negbinomial.size	1.46738e-12	3.97887e-12	1	103
Kif26a	OK	negbinomial.size	1.50477e-12	4.07864e-12	1	62
Bace2	OK	negbinomial.size	1.51416e-12	4.10328e-12	1	50
Gspt1	OK	negbinomial.size	1.64081e-12	4.44383e-12	1	677
Hmg20b	OK	negbinomial.size	1.77803e-12	4.8078e-12	1	644
Agap3	OK	negbinomial.size	1.8444e-12	4.98428e-12	1	387
Ramp3	OK	negbinomial.size	1.89991e-12	5.13033e-12	1	27
Hectd1	OK	negbinomial.size	1.90983e-12	5.15598e-12	1	1033
Plin3	OK	negbinomial.size	2.21057e-12	5.94732e-12	1	136
Kansl1l	OK	negbinomial.size	2.38399e-12	6.40299e-12	1	239
Serpinb6b	OK	negbinomial.size	2.51672e-12	6.75149e-12	1	58
Arhgef1	OK	negbinomial.size	2.53069e-12	6.78762e-12	1	375
Ifi35	OK	negbinomial.size	2.60618e-12	6.98596e-12	1	171
Ddx42	OK	negbinomial.size	2.84436e-12	7.6169e-12	1	793
Mapk14	OK	negbinomial.size	2.885e-12	7.72117e-12	1	417
Aldh1a3	OK	negbinomial.size	3.12719e-12	8.35453e-12	1	57
Acat2	OK	negbinomial.size	3.18897e-12	8.51625e-12	1	243
Ang	OK	negbinomial.size	3.51094e-12	9.36137e-12	1	54
Pikfyve	OK	negbinomial.size	3.57527e-12	9.52729e-12	1	330
Ssrp1	OK	negbinomial.size	3.72872e-12	9.92841e-12	1	917
Fam129b	OK	negbinomial.size	3.92008e-12	1.04236e-11	1	256
Adrb1	OK	negbinomial.size	3.97372e-12	1.05621e-11	1	50
Plekhh3	OK	negbinomial.size	4.094e-12	1.08712e-11	1	153
Jade2	OK	negbinomial.size	4.20581e-12	1.11638e-11	1	124
Zc3h7a	OK	negbinomial.size	4.37215e-12	1.15985e-11	1	486
Gstt1	OK	negbinomial.size	4.3817e-12	1.16216e-11	1	59
Chka	OK	negbinomial.size	4.72721e-12	1.25233e-11	1	469
Cpq	OK	negbinomial.size	4.7945e-12	1.26966e-11	1	106
Dpy19l4	OK	negbinomial.size	5.2409e-12	1.38652e-11	1	304
Wnt10a	OK	negbinomial.size	5.51994e-12	1.45807e-11	1	22
Lox	OK	negbinomial.size	5.7255e-12	1.51179e-11	1	81
Gzmm	OK	negbinomial.size	6.06822e-12	1.60134e-11	1	81
Heph	OK	negbinomial.size	6.14417e-12	1.62076e-11	1	41
Tmem9	OK	negbinomial.size	6.2723e-12	1.65359e-11	1	511
Cfl2	OK	negbinomial.size	6.74603e-12	1.77504e-11	1	643
Rab3d	OK	negbinomial.size	7.31624e-12	1.92062e-11	1	416
Zfp185	OK	negbinomial.size	7.32888e-12	1.92356e-11	1	47
Mapkapk3	OK	negbinomial.size	7.40174e-12	1.94194e-11	1	54
Scpep1	OK	negbinomial.size	8.25112e-12	2.16228e-11	1	125
Cebpz	OK	negbinomial.size	8.87925e-12	2.32241e-11	1	634
Mtap	OK	negbinomial.size	9.06981e-12	2.37043e-11	1	59
Cxcl16	OK	negbinomial.size	9.21672e-12	2.40836e-11	1	83
Gprasp2	OK	negbinomial.size	9.61532e-12	2.51058e-11	1	47
Sh3rf1	OK	negbinomial.size	1.00128e-11	2.61235e-11	1	70
Arl10	OK	negbinomial.size	1.06048e-11	2.76363e-11	1	55
Zfp408	OK	negbinomial.size	1.11869e-11	2.9131e-11	1	180
Fstl1	OK	negbinomial.size	1.13056e-11	2.94345e-11	1	65
Angpt1	OK	negbinomial.size	1.14998e-11	2.99212e-11	1	44
Polr1a	OK	negbinomial.size	1.2078e-11	3.13973e-11	1	139
Tor3a	OK	negbinomial.size	1.22873e-11	3.1917e-11	1	85
Prss8	OK	negbinomial.size	1.24861e-11	3.24149e-11	1	118
Csad	OK	negbinomial.size	1.29295e-11	3.35465e-11	1	347
Trim12a	OK	negbinomial.size	1.29382e-11	3.35627e-11	1	58
Cntln	OK	negbinomial.size	1.40399e-11	3.63789e-11	1	311
Inf2	OK	negbinomial.size	1.43793e-11	3.72231e-11	1	51
Msantd3	OK	negbinomial.size	1.46321e-11	3.78629e-11	1	84
Gadd45b	OK	negbinomial.size	1.53529e-11	3.96904e-11	1	87
Slc22a18	OK	negbinomial.size	1.5621e-11	4.03603e-11	1	66
Prex2	OK	negbinomial.size	1.58327e-11	4.08918e-11	1	44
Wdr82	OK	negbinomial.size	1.77584e-11	4.58131e-11	1	298
Fam83g	OK	negbinomial.size	2.02213e-11	5.19502e-11	1	78
Col4a3bp	OK	negbinomial.size	2.14516e-11	5.50589e-11	1	328
Rab38	OK	negbinomial.size	2.16165e-11	5.54717e-11	1	45
Ptbp1	OK	negbinomial.size	2.18995e-11	5.61765e-11	1	559
Sp3	OK	negbinomial.size	2.29627e-11	5.88707e-11	1	688
Palmd	OK	negbinomial.size	2.34208e-11	6.00337e-11	1	62
Tpbg	OK	negbinomial.size	2.36061e-11	6.04974e-11	1	123
Mblac2	OK	negbinomial.size	2.38347e-11	6.10485e-11	1	112
Trp73	OK	negbinomial.size	2.46987e-11	6.32497e-11	1	38
Tor1aip1	OK	negbinomial.size	2.51227e-11	6.43225e-11	1	480
Slc7a11	OK	negbinomial.size	2.73791e-11	7.00216e-11	1	66
Rasa2	OK	negbinomial.size	2.83385e-11	7.23934e-11	1	368
Syde2	OK	negbinomial.size	2.93254e-11	7.48442e-11	1	73
Dlc1	OK	negbinomial.size	2.97382e-11	7.58409e-11	1	49
1700019D03Rik	OK	negbinomial.size	3.15752e-11	8.04049e-11	1	65
Wbp11	OK	negbinomial.size	3.22838e-11	8.21631e-11	1	883
Sun2	OK	negbinomial.size	3.29495e-11	8.38417e-11	1	128
Pls3	OK	negbinomial.size	3.30895e-11	8.41821e-11	1	415
Stard10	OK	negbinomial.size	3.42516e-11	8.70736e-11	1	566
5730559C18Rik	OK	negbinomial.size	3.63098e-11	9.22023e-11	1	43
Tceal3	OK	negbinomial.size	3.65137e-11	9.27027e-11	1	55
Mfn1	OK	negbinomial.size	3.6608e-11	9.29249e-11	1	377
Adamtsl3	OK	negbinomial.size	3.80137e-11	9.62954e-11	1	30
Ildr1	OK	negbinomial.size	4.13593e-11	1.04556e-10	1	425
B230354K17Rik	OK	negbinomial.size	4.36385e-11	1.10236e-10	1	200
Armcx4	OK	negbinomial.size	4.54663e-11	1.14725e-10	1	88
B3glct	OK	negbinomial.size	4.68528e-11	1.18158e-10	1	97
B4galt4	OK	negbinomial.size	5.13446e-11	1.29198e-10	1	264
Lrch1	OK	negbinomial.size	5.60498e-11	1.40803e-10	1	125
2810004N23Rik	OK	negbinomial.size	5.73878e-11	1.44111e-10	1	332
Map3k2	OK	negbinomial.size	5.93784e-11	1.49027e-10	1	354
Igsf10	OK	negbinomial.size	6.08633e-11	1.52641e-10	1	68
St7	OK	negbinomial.size	6.09734e-11	1.52889e-10	1	54
Casp8	OK	negbinomial.size	6.15204e-11	1.54232e-10	1	96
Plscr4	OK	negbinomial.size	6.18372e-11	1.54969e-10	1	56
Wnt7b	OK	negbinomial.size	6.2246e-11	1.55936e-10	1	74
Eif4g1	OK	negbinomial.size	6.43123e-11	1.60935e-10	1	905
Tmc6	OK	negbinomial.size	6.60485e-11	1.65158e-10	1	72
Evc2	OK	negbinomial.size	6.72964e-11	1.68185e-10	1	31
Celsr2	OK	negbinomial.size	6.98744e-11	1.745e-10	1	489
Mnat1	OK	negbinomial.size	6.98995e-11	1.74531e-10	1	461
Klhl9	OK	negbinomial.size	7.283e-11	1.81714e-10	1	826
Dbt	OK	negbinomial.size	7.49265e-11	1.86842e-10	1	327
Serpinb8	OK	negbinomial.size	8.21789e-11	2.04702e-10	1	64
Ripk4	OK	negbinomial.size	8.4229e-11	2.09578e-10	1	385
Brca2	OK	negbinomial.size	8.70702e-11	2.16489e-10	1	102
Ptpn11	OK	negbinomial.size	8.99137e-11	2.23396e-10	1	599
Sec63	OK	negbinomial.size	9.08775e-11	2.25625e-10	1	790
Elk4	OK	negbinomial.size	9.2092e-11	2.28557e-10	1	380
2310001H17Rik	OK	negbinomial.size	9.23687e-11	2.29118e-10	1	94
Etv1	OK	negbinomial.size	9.48573e-11	2.35162e-10	1	84
Gnl3	OK	negbinomial.size	9.76013e-11	2.41789e-10	1	313
Dock7	OK	negbinomial.size	9.8409e-11	2.43745e-10	1	507
Snhg12	OK	negbinomial.size	1.0757e-10	2.65902e-10	1	440
Usp46	OK	negbinomial.size	1.07591e-10	2.65906e-10	1	394
Uchl3	OK	negbinomial.size	1.08258e-10	2.6741e-10	1	427
Asah1	OK	negbinomial.size	1.08505e-10	2.6789e-10	1	637
Phyhip	OK	negbinomial.size	1.09394e-10	2.6997e-10	1	120
Sdad1	OK	negbinomial.size	1.09645e-10	2.70539e-10	1	171
Kctd11	OK	negbinomial.size	1.11676e-10	2.75501e-10	1	163
Spet2	OK	negbinomial.size	1.13757e-10	2.80481e-10	1	835
Ccser2	OK	negbinomial.size	1.14533e-10	2.82344e-10	1	498
Srcap	OK	negbinomial.size	1.14658e-10	2.82602e-10	1	194
Cldn8	OK	negbinomial.size	1.14925e-10	2.83209e-10	1	68
Mnd1	OK	negbinomial.size	1.16749e-10	2.87495e-10	1	85
Mrc2	OK	negbinomial.size	1.16879e-10	2.87762e-10	1	63
Tbc1d2b	OK	negbinomial.size	1.1814e-10	2.90655e-10	1	59
Cds2	OK	negbinomial.size	1.19019e-10	2.92766e-10	1	419
Cfh	OK	negbinomial.size	1.22879e-10	3.01768e-10	1	49
Pxdc1	OK	negbinomial.size	1.24563e-10	3.05794e-10	1	88
Ablim3	OK	negbinomial.size	1.25571e-10	3.08158e-10	1	27
Steap4	OK	negbinomial.size	1.26911e-10	3.11334e-10	1	40
Lad1	OK	negbinomial.size	1.33981e-10	3.28321e-10	1	66
Tead3	OK	negbinomial.size	1.36544e-10	3.34422e-10	1	54
Zfp618	OK	negbinomial.size	1.37319e-10	3.36259e-10	1	146
Fez2	OK	negbinomial.size	1.44752e-10	3.54271e-10	1	120
Khk	OK	negbinomial.size	1.4718e-10	3.60016e-10	1	194
Fam110c	OK	negbinomial.size	1.47825e-10	3.61465e-10	1	35
Irf2	OK	negbinomial.size	1.51873e-10	3.71231e-10	1	513
Atm	OK	negbinomial.size	1.52455e-10	3.72587e-10	1	218
Zhx2	OK	negbinomial.size	1.59683e-10	3.89829e-10	1	241
Grina	OK	negbinomial.size	1.70221e-10	4.15034e-10	1	559
Ctbp2	OK	negbinomial.size	1.7142e-10	4.17807e-10	1	387
Ept1	OK	negbinomial.size	1.72653e-10	4.20662e-10	1	305
Nde1	OK	negbinomial.size	1.73052e-10	4.21407e-10	1	128
Upk3bl	OK	negbinomial.size	1.75877e-10	4.28056e-10	1	40
Tmprss13	OK	negbinomial.size	1.75987e-10	4.28248e-10	1	81
Ccnl1	OK	negbinomial.size	1.77388e-10	4.31425e-10	1	1067
Tet2	OK	negbinomial.size	1.78384e-10	4.33771e-10	1	300
Hadha	OK	negbinomial.size	1.88554e-10	4.57926e-10	1	479
Tmem211	OK	negbinomial.size	1.9232e-10	4.66823e-10	1	51
Camsap2	OK	negbinomial.size	1.92932e-10	4.68224e-10	1	320
Hebp2	OK	negbinomial.size	1.96114e-10	4.75437e-10	1	70
Dnajc3	OK	negbinomial.size	1.98225e-10	4.80212e-10	1	751
Shank1	OK	negbinomial.size	2.00367e-10	4.85229e-10	1	59
Gpc4	OK	negbinomial.size	2.00725e-10	4.86009e-10	1	65
Oasl2	OK	negbinomial.size	2.09221e-10	5.05949e-10	1	63
Spryd7	OK	negbinomial.size	2.31762e-10	5.58966e-10	1	362
Psd3	OK	negbinomial.size	2.40154e-10	5.78386e-10	1	204
Acp6	OK	negbinomial.size	2.60099e-10	6.24871e-10	1	73
Myadm	OK	negbinomial.size	2.62482e-10	6.30486e-10	1	152
Tmem209	OK	negbinomial.size	2.64158e-10	6.344e-10	1	291
Ccdc68	OK	negbinomial.size	2.85705e-10	6.85177e-10	1	54
Arhgef17	OK	negbinomial.size	2.85887e-10	6.85493e-10	1	168
Far1	OK	negbinomial.size	2.95168e-10	7.07124e-10	1	838
Tnk1	OK	negbinomial.size	3.06145e-10	7.32387e-10	1	77
Nr3c2	OK	negbinomial.size	3.16985e-10	7.57788e-10	1	116
Gm13056	OK	negbinomial.size	3.18689e-10	7.61726e-10	1	29
Rbm5	OK	negbinomial.size	3.21189e-10	7.67566e-10	1	1247
Gprin3	OK	negbinomial.size	3.29437e-10	7.86725e-10	1	52
C1s1	OK	negbinomial.size	3.367e-10	8.03646e-10	1	38
Tgfb3	OK	negbinomial.size	3.37314e-10	8.04971e-10	1	69
Gm10036	OK	negbinomial.size	3.46145e-10	8.25466e-10	1	358
Zbtb44	OK	negbinomial.size	3.6654e-10	8.73029e-10	1	638
4930522L14Rik	OK	negbinomial.size	3.68747e-10	8.78133e-10	1	52
Map3k5	OK	negbinomial.size	3.74595e-10	8.91747e-10	1	190
Mtfr1	OK	negbinomial.size	4.41943e-10	1.04895e-09	1	189
Nf1	OK	negbinomial.size	4.64372e-10	1.10122e-09	1	569
Hist1h4d	OK	negbinomial.size	4.69997e-10	1.11398e-09	1	111
Xbp1	OK	negbinomial.size	4.72828e-10	1.1203e-09	1	724
Gyltl1b	OK	negbinomial.size	4.88472e-10	1.15656e-09	1	51
Col4a5	OK	negbinomial.size	4.90763e-10	1.16178e-09	1	46
Slc38a6	OK	negbinomial.size	4.94631e-10	1.17053e-09	1	156
Arhgef6	OK	negbinomial.size	5.16849e-10	1.22204e-09	1	91
Slc2a4	OK	negbinomial.size	5.17156e-10	1.22256e-09	1	49
Kdelr1	OK	negbinomial.size	5.21723e-10	1.23292e-09	1	610
Fermt2	OK	negbinomial.size	5.4662e-10	1.29064e-09	1	233
Prkrir	OK	negbinomial.size	5.49825e-10	1.29775e-09	1	556
Slco2a1	OK	negbinomial.size	5.6557e-10	1.33399e-09	1	35
Rab7b	OK	negbinomial.size	5.90949e-10	1.39264e-09	1	28
Gm10269	OK	negbinomial.size	5.93332e-10	1.39777e-09	1	119
Dgcr2	OK	negbinomial.size	5.97062e-10	1.40632e-09	1	319
Cttnbp2	OK	negbinomial.size	6.00082e-10	1.41319e-09	1	404
N4bp1	OK	negbinomial.size	6.30685e-10	1.48295e-09	1	406
Thrb	OK	negbinomial.size	6.59324e-10	1.54787e-09	1	45
Snap23	OK	negbinomial.size	6.73416e-10	1.58041e-09	1	169
Pacsin2	OK	negbinomial.size	6.74908e-10	1.58364e-09	1	396
Zdhhc20	OK	negbinomial.size	6.80007e-10	1.59533e-09	1	542
Fkbp10	OK	negbinomial.size	7.23538e-10	1.69599e-09	1	39
Tmem159	OK	negbinomial.size	7.71759e-10	1.80622e-09	1	571
Ppp1r13b	OK	negbinomial.size	7.81849e-10	1.8292e-09	1	276
Ctnnd2	OK	negbinomial.size	8.02874e-10	1.8771e-09	1	308
Zbtb12	OK	negbinomial.size	8.56215e-10	1.99906e-09	1	131
Bmp4	OK	negbinomial.size	8.67288e-10	2.02422e-09	1	30
Gjb3	OK	negbinomial.size	8.92797e-10	2.08197e-09	1	25
Yeats2	OK	negbinomial.size	9.20094e-10	2.14452e-09	1	265
Ppp6r1	OK	negbinomial.size	9.23588e-10	2.1523e-09	1	253
Kctd12b	OK	negbinomial.size	9.49331e-10	2.21001e-09	1	32
Aqr	OK	negbinomial.size	9.72206e-10	2.2621e-09	1	612
Tap2	OK	negbinomial.size	9.89929e-10	2.30216e-09	1	131
Dcbld2	OK	negbinomial.size	9.91343e-10	2.30505e-09	1	184
Zfp945	OK	negbinomial.size	9.98094e-10	2.31956e-09	1	186
Wnt5a	OK	negbinomial.size	1.00618e-09	2.33754e-09	1	65
Rap1b	OK	negbinomial.size	1.00892e-09	2.34351e-09	1	837
Efs	OK	negbinomial.size	1.03496e-09	2.40154e-09	1	115
Nsmaf	OK	negbinomial.size	1.09992e-09	2.54835e-09	1	140
Adamts9	OK	negbinomial.size	1.10917e-09	2.56936e-09	1	55
Bid	OK	negbinomial.size	1.11589e-09	2.58316e-09	1	61
Oxr1	OK	negbinomial.size	1.18521e-09	2.74036e-09	1	659
Tmco4	OK	negbinomial.size	1.20662e-09	2.78795e-09	1	48
Pola1	OK	negbinomial.size	1.38268e-09	3.18557e-09	1	155
Rnft1	OK	negbinomial.size	1.39136e-09	3.205e-09	1	170
Tbc1d5	OK	negbinomial.size	1.4657e-09	3.37226e-09	1	200
Plcxd1	OK	negbinomial.size	1.49886e-09	3.44678e-09	1	31
Gigyf1	OK	negbinomial.size	1.53992e-09	3.54061e-09	1	310
Pdgfc	OK	negbinomial.size	1.54917e-09	3.56128e-09	1	73
Gpatch4	OK	negbinomial.size	1.55794e-09	3.58083e-09	1	219
Gins2	OK	negbinomial.size	1.61955e-09	3.7193e-09	1	118
Elavl1	OK	negbinomial.size	1.68929e-09	3.87685e-09	1	828
Medag	OK	negbinomial.size	1.71867e-09	3.94226e-09	1	24
Vasn	OK	negbinomial.size	1.73221e-09	3.97266e-09	1	54
Ripk1	OK	negbinomial.size	1.75291e-09	4.01877e-09	1	107
Chad	OK	negbinomial.size	1.8027e-09	4.13015e-09	1	33
Slc4a11	OK	negbinomial.size	1.84261e-09	4.21944e-09	1	76
Tra2a	OK	negbinomial.size	1.84393e-09	4.22174e-09	1	1652
Usp2	OK	negbinomial.size	1.88587e-09	4.31633e-09	1	104
Aox1	OK	negbinomial.size	2.00105e-09	4.57377e-09	1	25
Ass1	OK	negbinomial.size	2.00448e-09	4.58085e-09	1	46
Eif1ax	OK	negbinomial.size	2.01959e-09	4.61383e-09	1	1006
Snx33	OK	negbinomial.size	2.07781e-09	4.74127e-09	1	65
Cdc37l1	OK	negbinomial.size	2.09816e-09	4.78688e-09	1	401
Sox5	OK	negbinomial.size	2.19941e-09	5.00864e-09	1	33
Chd1	OK	negbinomial.size	2.20167e-09	5.01274e-09	1	706
Gxylt2	OK	negbinomial.size	2.27902e-09	5.18212e-09	1	91
Bicd2	OK	negbinomial.size	2.30156e-09	5.23162e-09	1	274
Sec61a2	OK	negbinomial.size	2.31572e-09	5.26293e-09	1	284
Zmym5	OK	negbinomial.size	2.36083e-09	5.36186e-09	1	646
Rnf13	OK	negbinomial.size	2.39391e-09	5.43338e-09	1	609
Lrpprc	OK	negbinomial.size	2.47179e-09	5.60638e-09	1	409
Myzap	OK	negbinomial.size	2.47977e-09	5.62354e-09	1	33
Trib1	OK	negbinomial.size	2.55496e-09	5.7902e-09	1	198
Fbxl14	OK	negbinomial.size	2.63954e-09	5.9749e-09	1	459
Vars	OK	negbinomial.size	2.67732e-09	6.0594e-09	1	343
Ephb4	OK	negbinomial.size	2.79676e-09	6.32341e-09	1	53
Adm	OK	negbinomial.size	3.13568e-09	7.07089e-09	1	56
Ror2	OK	negbinomial.size	3.14386e-09	7.08816e-09	1	32
Tgif2	OK	negbinomial.size	3.15215e-09	7.10449e-09	1	52
Slc41a3	OK	negbinomial.size	3.33624e-09	7.51069e-09	1	82
Rpl13a-ps1	OK	negbinomial.size	3.40291e-09	7.65697e-09	1	227
Nphp3	OK	negbinomial.size	3.43899e-09	7.73176e-09	1	61
AF529169	OK	negbinomial.size	3.44888e-09	7.7527e-09	1	35
Cyb5b	OK	negbinomial.size	3.58408e-09	8.04864e-09	1	759
Mdfi	OK	negbinomial.size	3.59771e-09	8.07658e-09	1	35
Sp4	OK	negbinomial.size	3.61107e-09	8.10523e-09	1	390
Surf4	OK	negbinomial.size	3.74382e-09	8.3935e-09	1	708
Misp	OK	negbinomial.size	3.84055e-09	8.60609e-09	1	89
Nr2f6	OK	negbinomial.size	3.98666e-09	8.93056e-09	1	550
Tacr1	OK	negbinomial.size	4.00489e-09	8.96696e-09	1	23
Ipo5	OK	negbinomial.size	4.22099e-09	9.43994e-09	1	480
Mpped2	OK	negbinomial.size	4.23705e-09	9.47118e-09	1	399
Rps6ka3	OK	negbinomial.size	4.26813e-09	9.53908e-09	1	285
Smim15	OK	negbinomial.size	4.53542e-09	1.01231e-08	1	445
Yy1	OK	negbinomial.size	4.59103e-09	1.02389e-08	1	730
Kdelc2	OK	negbinomial.size	4.60323e-09	1.02644e-08	1	49
Bnipl	OK	negbinomial.size	4.62865e-09	1.03177e-08	1	37
Smad3	OK	negbinomial.size	4.71787e-09	1.05131e-08	1	55
Rpl7l1	OK	negbinomial.size	4.75926e-09	1.06019e-08	1	489
Wscd1	OK	negbinomial.size	4.92301e-09	1.09541e-08	1	39
Pds5b	OK	negbinomial.size	4.95879e-09	1.10283e-08	1	391
Tslp	OK	negbinomial.size	5.10696e-09	1.13541e-08	1	25
Alkbh1	OK	negbinomial.size	5.21087e-09	1.15794e-08	1	409
Foxp2	OK	negbinomial.size	5.29717e-09	1.17654e-08	1	35
Zfx	OK	negbinomial.size	5.36664e-09	1.19178e-08	1	437
Zcchc11	OK	negbinomial.size	5.69118e-09	1.2622e-08	1	527
Utp14b	OK	negbinomial.size	5.75318e-09	1.27553e-08	1	220
Jag1	OK	negbinomial.size	5.82015e-09	1.28996e-08	1	336
Rbm33	OK	negbinomial.size	5.9032e-09	1.30794e-08	1	520
Erich1	OK	negbinomial.size	5.9878e-09	1.32539e-08	1	365
Traf6	OK	negbinomial.size	6.00823e-09	1.32948e-08	1	169
Nt5e	OK	negbinomial.size	6.09924e-09	1.3494e-08	1	61
N4bp2	OK	negbinomial.size	6.10852e-09	1.35123e-08	1	305
Gpbp1l1	OK	negbinomial.size	6.26543e-09	1.38526e-08	1	473
Rybp	OK	negbinomial.size	6.3934e-09	1.4131e-08	1	499
Supt20	OK	negbinomial.size	6.57842e-09	1.45257e-08	1	588
Arhgap12	OK	negbinomial.size	6.63625e-09	1.46511e-08	1	383
Enho	OK	negbinomial.size	6.70933e-09	1.48076e-08	1	95
Tcerg1	OK	negbinomial.size	6.91506e-09	1.52493e-08	1	501
Crtap	OK	negbinomial.size	6.92812e-09	1.52756e-08	1	43
Mbtps2	OK	negbinomial.size	7.2595e-09	1.59881e-08	1	221
Tmem87a	OK	negbinomial.size	7.30633e-09	1.60886e-08	1	177
Map2k3	OK	negbinomial.size	7.88155e-09	1.7316e-08	1	231
Jag2	OK	negbinomial.size	7.91884e-09	1.73951e-08	1	280
Pgk1	OK	negbinomial.size	7.9614e-09	1.74829e-08	1	311
Sept10	OK	negbinomial.size	8.02437e-09	1.76155e-08	1	330
Tra2b	OK	negbinomial.size	8.02663e-09	1.76176e-08	1	1913
Ppm1m	OK	negbinomial.size	8.23716e-09	1.80593e-08	1	61
Zfp646	OK	negbinomial.size	8.38304e-09	1.83673e-08	1	293
Sox6	OK	negbinomial.size	8.65733e-09	1.8953e-08	1	41
Lxn	OK	negbinomial.size	9.01138e-09	1.97059e-08	1	104
Samd4	OK	negbinomial.size	9.41474e-09	2.05615e-08	1	40
Foxc1	OK	negbinomial.size	9.43711e-09	2.0607e-08	1	77
Ctso	OK	negbinomial.size	9.49457e-09	2.07291e-08	1	128
BC017643	OK	negbinomial.size	1.03156e-08	2.24855e-08	1	199
Dzip3	OK	negbinomial.size	1.07325e-08	2.33755e-08	1	416
Cyp2j9	OK	negbinomial.size	1.11343e-08	2.42314e-08	1	27
Zkscan17	OK	negbinomial.size	1.15068e-08	2.50219e-08	1	56
2310033P09Rik	OK	negbinomial.size	1.17411e-08	2.55274e-08	1	380
Dars	OK	negbinomial.size	1.20202e-08	2.61049e-08	1	574
Arhgef19	OK	negbinomial.size	1.20991e-08	2.62721e-08	1	255
Cluh	OK	negbinomial.size	1.21772e-08	2.64331e-08	1	341
Wdr36	OK	negbinomial.size	1.2512e-08	2.71426e-08	1	185
Slc35g1	OK	negbinomial.size	1.27443e-08	2.76332e-08	1	130
Oxct1	OK	negbinomial.size	1.27701e-08	2.76804e-08	1	879
Nudt11	OK	negbinomial.size	1.31426e-08	2.84607e-08	1	75
Acaa2	OK	negbinomial.size	1.33165e-08	2.88281e-08	1	365
Ddx26b	OK	negbinomial.size	1.34532e-08	2.91007e-08	1	233
Zdhhc9	OK	negbinomial.size	1.35462e-08	2.92832e-08	1	74
Uspl1	OK	negbinomial.size	1.47691e-08	3.1866e-08	1	297
Slc30a4	OK	negbinomial.size	1.48843e-08	3.20944e-08	1	105
Wdr72	OK	negbinomial.size	1.51124e-08	3.25757e-08	1	39
Icosl	OK	negbinomial.size	1.52163e-08	3.27944e-08	1	31
Ninj1	OK	negbinomial.size	1.55366e-08	3.34531e-08	1	227
Abat	OK	negbinomial.size	1.66424e-08	3.57716e-08	1	38
Dnph1	OK	negbinomial.size	1.67123e-08	3.59164e-08	1	160
Spaca6	OK	negbinomial.size	1.68762e-08	3.62569e-08	1	200
5430403G16Rik	OK	negbinomial.size	1.70112e-08	3.65354e-08	1	46
Zbtb42	OK	negbinomial.size	1.70846e-08	3.66757e-08	1	59
Cacnb4	OK	negbinomial.size	1.77992e-08	3.81677e-08	1	145
Dnajb1	OK	negbinomial.size	1.80022e-08	3.85968e-08	1	758
Top1mt	OK	negbinomial.size	1.82309e-08	3.90686e-08	1	57
Sc5d	OK	negbinomial.size	1.91851e-08	4.10552e-08	1	294
Hk1	OK	negbinomial.size	1.99446e-08	4.2647e-08	1	455
Ddx54	OK	negbinomial.size	2.00112e-08	4.27827e-08	1	360
Stc1	OK	negbinomial.size	2.03606e-08	4.35092e-08	1	34
3110021N24Rik	OK	negbinomial.size	2.09953e-08	4.48301e-08	1	79
Piezo1	OK	negbinomial.size	2.25094e-08	4.79578e-08	1	48
Maoa	OK	negbinomial.size	2.46986e-08	5.25396e-08	1	160
Utp11l	OK	negbinomial.size	2.47162e-08	5.25606e-08	1	594
Rcbtb2	OK	negbinomial.size	2.49406e-08	5.30211e-08	1	223
Triobp	OK	negbinomial.size	2.49583e-08	5.30506e-08	1	161
Ssr1	OK	negbinomial.size	2.50207e-08	5.31749e-08	1	1309
Synpo	OK	negbinomial.size	2.5905e-08	5.49854e-08	1	88
Echdc2	OK	negbinomial.size	2.61984e-08	5.55909e-08	1	45
Robo1	OK	negbinomial.size	2.65106e-08	5.62445e-08	1	472
Ovol2	OK	negbinomial.size	2.65845e-08	5.63924e-08	1	64
Tgfbr3	OK	negbinomial.size	2.68854e-08	5.69952e-08	1	89
Fam3c	OK	negbinomial.size	2.73596e-08	5.79733e-08	1	716
Ccdc122	OK	negbinomial.size	2.82203e-08	5.97505e-08	1	55
D10Wsu102e	OK	negbinomial.size	2.82249e-08	5.9751e-08	1	145
Prkcd	OK	negbinomial.size	2.93582e-08	6.21211e-08	1	157
Cdca7	OK	negbinomial.size	3.34352e-08	7.05393e-08	1	43
Rapgef4	OK	negbinomial.size	3.41026e-08	7.19026e-08	1	37
Rabgap1	OK	negbinomial.size	3.41737e-08	7.20415e-08	1	576
Rnf43	OK	negbinomial.size	3.43926e-08	7.24916e-08	1	225
Errfi1	OK	negbinomial.size	3.44913e-08	7.26884e-08	1	252
Epha2	OK	negbinomial.size	3.52589e-08	7.42716e-08	1	37
Nmi	OK	negbinomial.size	3.54575e-08	7.46435e-08	1	145
AI661453	OK	negbinomial.size	3.56535e-08	7.50446e-08	1	47
1600014C10Rik	OK	negbinomial.size	3.58627e-08	7.54732e-08	1	116
Igdcc4	OK	negbinomial.size	3.61376e-08	7.60281e-08	1	30
Rap2c	OK	negbinomial.size	3.61788e-08	7.61031e-08	1	143
Lrig1	OK	negbinomial.size	3.66406e-08	7.69911e-08	1	135
Larp7	OK	negbinomial.size	3.73268e-08	7.83967e-08	1	496
Mapre1	OK	negbinomial.size	3.77669e-08	7.92964e-08	1	1227
Sin3a	OK	negbinomial.size	3.78812e-08	7.95242e-08	1	545
Zfp275	OK	negbinomial.size	3.79511e-08	7.96463e-08	1	138
Epn1	OK	negbinomial.size	3.79648e-08	7.96628e-08	1	846
Tha1	OK	negbinomial.size	3.95366e-08	8.27948e-08	1	56
Sesn1	OK	negbinomial.size	4.08093e-08	8.53548e-08	1	225
Pgap2	OK	negbinomial.size	4.08807e-08	8.54911e-08	1	357
Map4k5	OK	negbinomial.size	4.39647e-08	9.18273e-08	1	358
Acvr2a	OK	negbinomial.size	4.40979e-08	9.20914e-08	1	236
Vps36	OK	negbinomial.size	4.57131e-08	9.53765e-08	1	812
Dact2	OK	negbinomial.size	4.623e-08	9.63811e-08	1	39
Nol6	OK	negbinomial.size	4.67241e-08	9.73515e-08	1	147
Nr2f2	OK	negbinomial.size	4.73896e-08	9.86927e-08	1	100
Wnt6	OK	negbinomial.size	4.74493e-08	9.88018e-08	1	30
Sh3rf2	OK	negbinomial.size	4.80418e-08	9.99743e-08	1	27
C1galt1	OK	negbinomial.size	5.02144e-08	1.044e-07	1	236
Supt16	OK	negbinomial.size	5.11446e-08	1.06301e-07	1	1036
Usp40	OK	negbinomial.size	5.25332e-08	1.0912e-07	1	390
Cdc42bpg	OK	negbinomial.size	5.27507e-08	1.09539e-07	1	171
Tmem140	OK	negbinomial.size	5.57512e-08	1.15575e-07	1	49
Arhgef18	OK	negbinomial.size	5.61324e-08	1.16312e-07	1	244
Numa1	OK	negbinomial.size	5.61872e-08	1.16408e-07	1	911
Acly	OK	negbinomial.size	5.62238e-08	1.16466e-07	1	874
Mfap1a	OK	negbinomial.size	5.70764e-08	1.18124e-07	1	584
Pak4	OK	negbinomial.size	5.97414e-08	1.23489e-07	1	322
Edaradd	OK	negbinomial.size	6.12645e-08	1.26561e-07	1	24
Kank2	OK	negbinomial.size	6.12756e-08	1.26564e-07	1	37
B230208H11Rik	OK	negbinomial.size	6.21001e-08	1.28228e-07	1	54
Cyp51	OK	negbinomial.size	6.3682e-08	1.31355e-07	1	399
Adam17	OK	negbinomial.size	6.54608e-08	1.34983e-07	1	208
Mob3c	OK	negbinomial.size	6.60975e-08	1.36255e-07	1	114
Pxn	OK	negbinomial.size	6.75015e-08	1.39044e-07	1	138
Epha1	OK	negbinomial.size	6.88046e-08	1.41663e-07	1	58
H2-T22	OK	negbinomial.size	7.06577e-08	1.45303e-07	1	97
Fam136a	OK	negbinomial.size	7.12362e-08	1.46448e-07	1	335
Ctps	OK	negbinomial.size	7.33151e-08	1.50562e-07	1	161
Srek1ip1	OK	negbinomial.size	7.77343e-08	1.59493e-07	1	463
Zfp260	OK	negbinomial.size	7.81755e-08	1.60374e-07	1	764
P3h3	OK	negbinomial.size	7.9681e-08	1.63389e-07	1	78
Uaca	OK	negbinomial.size	8.23403e-08	1.68664e-07	1	74
Glis2	OK	negbinomial.size	8.23828e-08	1.68725e-07	1	30
Lgals3bp	OK	negbinomial.size	8.364e-08	1.71223e-07	1	227
Prim1	OK	negbinomial.size	8.38113e-08	1.71548e-07	1	229
Lpcat3	OK	negbinomial.size	8.537e-08	1.74606e-07	1	238
Slc6a9	OK	negbinomial.size	8.99105e-08	1.83644e-07	1	93
Rcl1	OK	negbinomial.size	9.29844e-08	1.89866e-07	1	102
Kndc1	OK	negbinomial.size	1.00025e-07	2.03906e-07	1	48
Ubash3b	OK	negbinomial.size	1.0005e-07	2.03925e-07	1	63
Fam46b	OK	negbinomial.size	1.00754e-07	2.05269e-07	1	37
Ctage5	OK	negbinomial.size	1.01739e-07	2.07214e-07	1	842
Tfap4	OK	negbinomial.size	1.0348e-07	2.10695e-07	1	81
Ccnd3	OK	negbinomial.size	1.06116e-07	2.15998e-07	1	360
Nckap1	OK	negbinomial.size	1.08196e-07	2.201e-07	1	777
Psmb10	OK	negbinomial.size	1.10145e-07	2.24032e-07	1	216
Frem2	OK	negbinomial.size	1.10929e-07	2.25559e-07	1	114
Mocs1	OK	negbinomial.size	1.11583e-07	2.26821e-07	1	64
Ogfrl1	OK	negbinomial.size	1.11569e-07	2.26821e-07	1	362
Appl2	OK	negbinomial.size	1.16247e-07	2.36019e-07	1	63
Fndc4	OK	negbinomial.size	1.16991e-07	2.37424e-07	1	30
Kdm6a	OK	negbinomial.size	1.17694e-07	2.38777e-07	1	379
Elmo3	OK	negbinomial.size	1.18452e-07	2.4028e-07	1	79
Tmem260	OK	negbinomial.size	1.18967e-07	2.41253e-07	1	223
Tmem51	OK	negbinomial.size	1.20923e-07	2.45145e-07	1	48
Fbxw7	OK	negbinomial.size	1.2153e-07	2.46267e-07	1	369
Camk1g	OK	negbinomial.size	1.25204e-07	2.53372e-07	1	35
Rps18-ps3	OK	negbinomial.size	1.27239e-07	2.57375e-07	1	160
Casp7	OK	negbinomial.size	1.32274e-07	2.67161e-07	1	67
Pdxk	OK	negbinomial.size	1.33293e-07	2.69021e-07	1	203
Nudt8	OK	negbinomial.size	1.35014e-07	2.72291e-07	1	127
Furin	OK	negbinomial.size	1.3826e-07	2.78672e-07	1	329
Tmod3	OK	negbinomial.size	1.40416e-07	2.82933e-07	1	310
Lncpint	OK	negbinomial.size	1.47707e-07	2.9723e-07	1	68
Dennd1b	OK	negbinomial.size	1.5005e-07	3.01721e-07	1	289
Ints2	OK	negbinomial.size	1.52468e-07	3.06446e-07	1	308
Npepl1	OK	negbinomial.size	1.54123e-07	3.09682e-07	1	152
Dhcr7	OK	negbinomial.size	1.54979e-07	3.11308e-07	1	119
Il15ra	OK	negbinomial.size	1.64031e-07	3.28571e-07	1	64
Mtx3	OK	negbinomial.size	1.66106e-07	3.32482e-07	1	132
Rprd2	OK	negbinomial.size	1.70495e-07	3.41015e-07	1	528
Stim2	OK	negbinomial.size	1.72246e-07	3.44467e-07	1	536
Trim47	OK	negbinomial.size	1.735e-07	3.46821e-07	1	60
Acaa1b	OK	negbinomial.size	1.7472e-07	3.49106e-07	1	58
A430105I19Rik	OK	negbinomial.size	1.75888e-07	3.51161e-07	1	28
Zfp651	OK	negbinomial.size	1.75903e-07	3.51161e-07	1	154
Stap2	OK	negbinomial.size	1.81397e-07	3.6181e-07	1	49
Klhdc8b	OK	negbinomial.size	1.8144e-07	3.61842e-07	1	42
Arrb1	OK	negbinomial.size	1.95535e-07	3.89037e-07	1	85
P4ha1	OK	negbinomial.size	1.97046e-07	3.91987e-07	1	259
Usp7	OK	negbinomial.size	1.97954e-07	3.93735e-07	1	707
Snrnp200	OK	negbinomial.size	2.06259e-07	4.10075e-07	1	621
Pwwp2b	OK	negbinomial.size	2.09055e-07	4.15451e-07	1	79
Pogz	OK	negbinomial.size	2.09332e-07	4.1588e-07	1	438
Sil1	OK	negbinomial.size	2.10493e-07	4.18063e-07	1	182
Smim3	OK	negbinomial.size	2.15637e-07	4.27905e-07	1	44
Aldoc	OK	negbinomial.size	2.24633e-07	4.45238e-07	1	250
Slc25a24	OK	negbinomial.size	2.25747e-07	4.47314e-07	1	71
Ulk1	OK	negbinomial.size	2.27775e-07	4.51268e-07	1	263
Fkbp14	OK	negbinomial.size	2.2914e-07	4.53905e-07	1	96
Irgm1	OK	negbinomial.size	2.30178e-07	4.55829e-07	1	44
Rab19	OK	negbinomial.size	2.30216e-07	4.55838e-07	1	31
Mob1b	OK	negbinomial.size	2.33085e-07	4.61384e-07	1	723
Larp1b	OK	negbinomial.size	2.34659e-07	4.64433e-07	1	282
Rhoa	OK	negbinomial.size	2.3835e-07	4.71325e-07	1	1978
Cxxc4	OK	negbinomial.size	2.50965e-07	4.95838e-07	1	235
Clk1	OK	negbinomial.size	2.53017e-07	4.99821e-07	1	1413
Slc8b1	OK	negbinomial.size	2.53822e-07	5.01338e-07	1	43
Dera	OK	negbinomial.size	2.62947e-07	5.18531e-07	1	153
Stat1	OK	negbinomial.size	2.68956e-07	5.2992e-07	1	113
Bmpr1a	OK	negbinomial.size	2.76667e-07	5.44719e-07	1	506
Ddx52	OK	negbinomial.size	2.847e-07	5.59776e-07	1	334
Tspan15	OK	negbinomial.size	2.85338e-07	5.60897e-07	1	82
Zfp397	OK	negbinomial.size	2.8874e-07	5.67174e-07	1	437
1810032O08Rik	OK	negbinomial.size	3.17426e-07	6.22263e-07	1	146
Fgd1	OK	negbinomial.size	3.30107e-07	6.46283e-07	1	138
Dgka	OK	negbinomial.size	3.30775e-07	6.47497e-07	1	72
Kctd8	OK	negbinomial.size	3.31368e-07	6.48565e-07	1	29
Grb10	OK	negbinomial.size	3.31558e-07	6.48843e-07	1	51
Zfp281	OK	negbinomial.size	3.34712e-07	6.54732e-07	1	355
Fam8a1	OK	negbinomial.size	3.48042e-07	6.80416e-07	1	253
Dubr	OK	negbinomial.size	3.60038e-07	7.03363e-07	1	188
Eif2ak4	OK	negbinomial.size	3.66829e-07	7.1591e-07	1	72
Nmnat3	OK	negbinomial.size	3.6782e-07	7.1774e-07	1	42
Eogt	OK	negbinomial.size	3.70385e-07	7.22642e-07	1	207
M6pr	OK	negbinomial.size	3.8033e-07	7.41396e-07	1	1008
Smg6	OK	negbinomial.size	3.82692e-07	7.45798e-07	1	521
Nudt19	OK	negbinomial.size	3.88721e-07	7.57111e-07	1	156
Cdc14b	OK	negbinomial.size	4.14653e-07	8.06119e-07	1	111
Tnfsf12	OK	negbinomial.size	4.2064e-07	8.1764e-07	1	36
Mecp2	OK	negbinomial.size	4.25294e-07	8.26333e-07	1	785
Mark2	OK	negbinomial.size	4.26622e-07	8.28794e-07	1	416
Pkd2	OK	negbinomial.size	4.34414e-07	8.4357e-07	1	269
Prodh	OK	negbinomial.size	4.36438e-07	8.47379e-07	1	51
Phldb2	OK	negbinomial.size	4.45783e-07	8.65152e-07	1	42
Trrap	OK	negbinomial.size	4.52278e-07	8.77381e-07	1	470
Icam2	OK	negbinomial.size	4.70069e-07	9.11244e-07	1	30
Bckdk	OK	negbinomial.size	4.72173e-07	9.14801e-07	1	200
Gjb2	OK	negbinomial.size	4.72551e-07	9.15273e-07	1	33
Slc16a2	OK	negbinomial.size	4.89904e-07	9.47669e-07	1	78
Chl1	OK	negbinomial.size	4.94596e-07	9.56471e-07	1	48
Caskin2	OK	negbinomial.size	4.96493e-07	9.60005e-07	1	77
Atp7a	OK	negbinomial.size	4.98652e-07	9.63905e-07	1	154
Wdr75	OK	negbinomial.size	5.11868e-07	9.8889e-07	1	236
Mkl2	OK	negbinomial.size	5.14463e-07	9.9362e-07	1	250
Irf1	OK	negbinomial.size	5.2264e-07	1.00913e-06	1	69
Nynrin	OK	negbinomial.size	5.24709e-07	1.01269e-06	1	35
Cdc42ep4	OK	negbinomial.size	5.34596e-07	1.03104e-06	1	113
Dcun1d1	OK	negbinomial.size	5.35155e-07	1.03182e-06	1	742
Tbkbp1	OK	negbinomial.size	5.39256e-07	1.03944e-06	1	44
Morc3	OK	negbinomial.size	5.40539e-07	1.04176e-06	1	281
Bcl9l	OK	negbinomial.size	5.5327e-07	1.06584e-06	1	166
Rbbp6	OK	negbinomial.size	5.57913e-07	1.07464e-06	1	1657
Sfxn1	OK	negbinomial.size	5.62169e-07	1.08237e-06	1	402
Def6	OK	negbinomial.size	5.71049e-07	1.099e-06	1	78
Paqr7	OK	negbinomial.size	5.73502e-07	1.10295e-06	1	47
Ttc21b	OK	negbinomial.size	5.74873e-07	1.10543e-06	1	125
Plp1	OK	negbinomial.size	5.85617e-07	1.12577e-06	1	106
Kctd2	OK	negbinomial.size	5.88769e-07	1.13118e-06	1	229
Rilpl1	OK	negbinomial.size	6.07634e-07	1.16677e-06	1	173
Efcab1	OK	negbinomial.size	6.44146e-07	1.23392e-06	1	62
Map3k4	OK	negbinomial.size	6.55469e-07	1.25472e-06	1	246
Epm2aip1	OK	negbinomial.size	6.56772e-07	1.25704e-06	1	507
Gpc6	OK	negbinomial.size	6.83891e-07	1.306e-06	1	50
2610008E11Rik	OK	negbinomial.size	6.92529e-07	1.32176e-06	1	327
Ly6k	OK	negbinomial.size	7.20888e-07	1.37453e-06	1	24
Impact	OK	negbinomial.size	7.2151e-07	1.37552e-06	1	241
Tmem125	OK	negbinomial.size	7.74036e-07	1.47298e-06	1	24
Inafm1	OK	negbinomial.size	7.81671e-07	1.48709e-06	1	157
Mtr	OK	negbinomial.size	7.84207e-07	1.4917e-06	1	85
Zbtb1	OK	negbinomial.size	7.89904e-07	1.50233e-06	1	269
Gna15	OK	negbinomial.size	8.07772e-07	1.53567e-06	1	28
Lgals8	OK	negbinomial.size	8.17637e-07	1.55399e-06	1	281
2310015A10Rik	OK	negbinomial.size	8.24269e-07	1.56594e-06	1	149
Vgll3	OK	negbinomial.size	8.25568e-07	1.56797e-06	1	24
Dctd	OK	negbinomial.size	8.26067e-07	1.5687e-06	1	33
Stxbp3	OK	negbinomial.size	8.37834e-07	1.59015e-06	1	367
Rxra	OK	negbinomial.size	8.65384e-07	1.64107e-06	1	193
Uri1	OK	negbinomial.size	8.68567e-07	1.64618e-06	1	595
Ier5l	OK	negbinomial.size	8.89665e-07	1.68523e-06	1	80
Stat2	OK	negbinomial.size	9.01918e-07	1.70773e-06	1	170
Gm6483	OK	negbinomial.size	9.03357e-07	1.71021e-06	1	618
Hist1h1a	OK	negbinomial.size	1.02045e-06	1.92331e-06	1	32
Ino80	OK	negbinomial.size	1.03031e-06	1.94109e-06	1	183
Arap1	OK	negbinomial.size	1.06373e-06	2.00211e-06	1	111
Oma1	OK	negbinomial.size	1.09004e-06	2.0505e-06	1	142
Slc7a2	OK	negbinomial.size	1.09852e-06	2.06616e-06	1	32
Uba7	OK	negbinomial.size	1.11963e-06	2.10441e-06	1	52
Rab13	OK	negbinomial.size	1.12605e-06	2.1162e-06	1	147
Sntb1	OK	negbinomial.size	1.12684e-06	2.11739e-06	1	23
Uty	OK	negbinomial.size	1.13353e-06	2.12906e-06	1	288
Atic	OK	negbinomial.size	1.14499e-06	2.1503e-06	1	378
Lgals7	OK	negbinomial.size	1.15531e-06	2.16938e-06	1	43
Pqlc1	OK	negbinomial.size	1.15893e-06	2.17527e-06	1	203
Pex26	OK	negbinomial.size	1.16709e-06	2.18999e-06	1	135
Zfp692	OK	negbinomial.size	1.1801e-06	2.21318e-06	1	238
Abhd17c	OK	negbinomial.size	1.25355e-06	2.34768e-06	1	394
Spon2	OK	negbinomial.size	1.2751e-06	2.38705e-06	1	95
Ppp2r3a	OK	negbinomial.size	1.28979e-06	2.41389e-06	1	293
Creb3l4	OK	negbinomial.size	1.30283e-06	2.43696e-06	1	38
Tacc2	OK	negbinomial.size	1.31335e-06	2.45563e-06	1	128
Hltf	OK	negbinomial.size	1.3303e-06	2.48696e-06	1	336
Tlk2	OK	negbinomial.size	1.37039e-06	2.55875e-06	1	420
Ppp2r5c	OK	negbinomial.size	1.41887e-06	2.64564e-06	1	507
Phpt1	OK	negbinomial.size	1.44334e-06	2.69016e-06	1	360
Slc30a1	OK	negbinomial.size	1.47244e-06	2.74364e-06	1	152
Hrsp12	OK	negbinomial.size	1.47394e-06	2.74606e-06	1	447
Metap2	OK	negbinomial.size	1.49561e-06	2.78567e-06	1	2114
Bst2	OK	negbinomial.size	1.51962e-06	2.82922e-06	1	177
Tap1	OK	negbinomial.size	1.52044e-06	2.83036e-06	1	62
Rnf130	OK	negbinomial.size	1.53401e-06	2.85523e-06	1	332
Arrdc1	OK	negbinomial.size	1.53681e-06	2.86006e-06	1	204
Zfp362	OK	negbinomial.size	1.54392e-06	2.87251e-06	1	166
Abhd11	OK	negbinomial.size	1.70491e-06	3.16509e-06	1	329
Fbxo2	OK	negbinomial.size	1.78095e-06	3.30176e-06	1	45
Parp10	OK	negbinomial.size	1.78669e-06	3.31195e-06	1	34
2700038G22Rik	OK	negbinomial.size	1.81658e-06	3.36505e-06	1	50
Prelid2	OK	negbinomial.size	1.82987e-06	3.38921e-06	1	31
Pde4d	OK	negbinomial.size	1.84416e-06	3.41476e-06	1	95
Cttn	OK	negbinomial.size	1.85226e-06	3.42928e-06	1	874
Man2b2	OK	negbinomial.size	1.97215e-06	3.64577e-06	1	50
Dtnb	OK	negbinomial.size	1.99308e-06	3.68298e-06	1	337
Alox12	OK	negbinomial.size	2.05175e-06	3.78983e-06	1	40
Ttc28	OK	negbinomial.size	2.06533e-06	3.81441e-06	1	229
Eva1b	OK	negbinomial.size	2.08036e-06	3.84165e-06	1	78
Vegfb	OK	negbinomial.size	2.18665e-06	4.03189e-06	1	152
Pitpnm3	OK	negbinomial.size	2.1884e-06	4.03458e-06	1	69
4930556M19Rik.1	OK	negbinomial.size	2.21605e-06	4.085e-06	1	23
H2-Q4	OK	negbinomial.size	2.22545e-06	4.10122e-06	1	54
Prr12	OK	negbinomial.size	2.34803e-06	4.31717e-06	1	259
Soat1	OK	negbinomial.size	2.43873e-06	4.47908e-06	1	209
Cobll1	OK	negbinomial.size	2.47121e-06	4.53751e-06	1	44
Nab1	OK	negbinomial.size	2.47619e-06	4.54603e-06	1	430
Gm266	OK	negbinomial.size	2.489e-06	4.56832e-06	1	29
Asrgl1	OK	negbinomial.size	2.49404e-06	4.57696e-06	1	165
Ctdnep1	OK	negbinomial.size	2.52855e-06	4.63902e-06	1	452
Rassf10	OK	negbinomial.size	2.53268e-06	4.64599e-06	1	41
Lipg	OK	negbinomial.size	2.54483e-06	4.667e-06	1	38
Gpsm2	OK	negbinomial.size	2.57623e-06	4.72333e-06	1	101
Pcsk5	OK	negbinomial.size	2.63415e-06	4.82561e-06	1	24
Trim13	OK	negbinomial.size	2.70012e-06	4.94446e-06	1	145
Piezo2	OK	negbinomial.size	2.72361e-06	4.98614e-06	1	25
Fxn	OK	negbinomial.size	2.83832e-06	5.19263e-06	1	190
Rpa2	OK	negbinomial.size	2.89344e-06	5.29062e-06	1	296
Lman2	OK	negbinomial.size	2.99407e-06	5.46727e-06	1	679
Nsun2	OK	negbinomial.size	3.01873e-06	5.51083e-06	1	447
Ccdc125	OK	negbinomial.size	3.07212e-06	5.60678e-06	1	61
9430038I01Rik	OK	negbinomial.size	3.12316e-06	5.69764e-06	1	119
Mcm4	OK	negbinomial.size	3.24795e-06	5.91577e-06	1	157
Scara3	OK	negbinomial.size	3.27252e-06	5.95812e-06	1	41
Peli2	OK	negbinomial.size	3.32887e-06	6.05909e-06	1	225
Ubr1	OK	negbinomial.size	3.38723e-06	6.16285e-06	1	316
Traf3ip2	OK	negbinomial.size	3.39212e-06	6.16966e-06	1	53
Eda	OK	negbinomial.size	3.42673e-06	6.22904e-06	1	28
Hebp1	OK	negbinomial.size	3.5004e-06	6.35514e-06	1	67
Pdia4	OK	negbinomial.size	3.53232e-06	6.4088e-06	1	727
Dusp10	OK	negbinomial.size	3.64937e-06	6.61588e-06	1	50
Asah2	OK	negbinomial.size	3.68147e-06	6.66963e-06	1	29
Uck2	OK	negbinomial.size	3.68462e-06	6.67445e-06	1	81
Myo1d	OK	negbinomial.size	3.68683e-06	6.67756e-06	1	117
Chmp3	OK	negbinomial.size	3.74506e-06	6.78031e-06	1	819
Msh3	OK	negbinomial.size	3.75326e-06	6.79425e-06	1	286
Nek9	OK	negbinomial.size	3.83874e-06	6.94437e-06	1	231
Rnaset2b	OK	negbinomial.size	3.88562e-06	7.02637e-06	1	98
Nipa1	OK	negbinomial.size	3.9001e-06	7.05161e-06	1	86
Cnot4	OK	negbinomial.size	3.91795e-06	7.082e-06	1	845
Caprin2	OK	negbinomial.size	3.92853e-06	7.09923e-06	1	156
Tmed5	OK	negbinomial.size	3.94594e-06	7.12881e-06	1	403
Exph5	OK	negbinomial.size	3.96468e-06	7.16171e-06	1	83
Smarcd3	OK	negbinomial.size	4.00964e-06	7.23908e-06	1	65
Ccdc186	OK	negbinomial.size	4.02009e-06	7.25603e-06	1	512
Sgms2	OK	negbinomial.size	4.05827e-06	7.32299e-06	1	103
[truncated: 8,363 more rows]

## Sheet: TFs in each group
Group-1		Group-2		Group-3		Group-4
Bbx		Elf5		Klf7		Max
Sox4		Mybl1		Rfx3		Rfx4
Meis1		Gata6		Creb1		Rarg
Dmrta2		Tead1		Brd8		Ruvbl2
Rybp		Msx1		Jmy		Gtf2e2
Sh3d19		Fos		Mapk8		Pbx4
Sox21		Ing4		Rfx2		Nedd8
Ctbp2		Polr2h		Blzf1		Rab11b
Zfp277		Baz1a		Mllt6		Zdhhc16
Ep300		Neurod1		3632451O06Rik		Taf6l
Ascl2		Eed		Shox2		Zfp64
Tgif2		Hmgb3		Ebf2		Cebpg
Runx2		Taf4a		Dmtf1		Polr2c
Nab2		Zfpm1		Ell2		4933429H19Rik
Six1		Maf		Ppard		Taf13
Dedd		Mcm3		Bdp1		Htatip2
Sp4		Nrarp		Zfp426		Olig1
Per3		Zfp90		Nr2c2		Ccnc
Nr1d1		Nfx1		Phf10		Zfp580
Glis2		Zfp113		Rb1		Taf12
Zfp467		Zhx1		Fem1c		Myef2
Smarca1		Plagl2		Ppargc1b		Psmd10
Hlf		Gtf2h1		Nfatc2		Men1
Tcf12		Ankrd2		Nfatc2ip		Pdcd7
Trp73		Rela		Mllt10		Nfyb
Tead3		Ilf3		Camk4		Ppp2r1a
Mta2		Sox10		Trps1		Ncoa3
Mybbp1a		Nfia		Nr6a1		Rab11a
Hes1		Zfp41		Zfp46		Polr2e
Runx1		Zik1		Setbp1		Zfp235
Smarca2		Elavl2		Trim24		Psmc5
Nfkb1		Zfp386		Bclaf1		Zfp523
Zfp281		Rnf38		Hira		Hmgn2
Carm1		Cnot8		Zfp398		Ing1
Mecp2		Dnmt1		Tardbp		Asb6
Gas7		Cbx3		Hivep3		Rfxap
Six4		Trim28		Nfatc3		Trib3
Plagl1		Creb5		Rnf141		Strap
Rbbp7		Gtf3c1		Creb3l1		Taf7
Foxg1		Sox13		Cdk9		Klf2
Pbxip1		Tcf19		Zdhhc21		Ankra2
Ets2		Maged1		Pknox1		Prkar1a
Rai14		Tle1		Zfp91		Nr1h2
Zfp275		Rab15		Tulp4		Ostf1
Tgfb1i1		Gabpb1		Atf6		Pdlim1
Stag1		Mcm6		Myt1		Snapc2
Ppp1r13b		Ascl1		Mbd2		Brdt
Npas2		Polr3b		Ncoa2		Snrpb
Trrap		Uhrf1		Pax5		Thra
Nfkb2		Cdk4		Map3k12		Bmyc
Pbx1		Sall2		Dpf3		Aip
Pawr		Zfp451		Clock		Cdkn2d
Arnt		Sertad2		Foxp1		Bpnt1
Btbd11		Tcea3		Hdac9		Cbx8
Gabpa		Chd4		Ssbp3		Znrd1
Stat2		Hmgb2		Ddx58		Sirt7
Rfx5		Hic2		Etv3		Creb3
Nr2f2		Fli1		Hdac11		Sirt2
E2f3		Lbh		Nfat5		Nrbf2
Tcerg1		Ezh2		Ank2		Tceb2
Zfp105		Tead2		Mitf		Asb8
Sirt1		Mcm2		Ski		Lsm4
Sox2		Mid1		Bcl6		Siah2
Fosl2		Carhsp1		Phtf1		Ccnh
Polr3e		Ccnk		Gtf2a1		Polr2k
Bach1		Klf4		Hivep1		Sra1
Tef		Elf4		Baz2a		Ppp5c
Dbp		Baz1b		Mef2a		Zfp248
Ncor2		Trp53bp1		Ivns1abp		Hdac3
Foxa1		Nupr1		Ncoa1		Yaf2
Xbp1		Smarca5		Mtf1		Gtf2b
Creb3l4		Hmg20a		Lhx2		Polr2i
Irf1		Foxp4		Tcf20		Mef2b
Notch2		Egr1		Zfp84		Irf3
Zfp292		Mafb		Ppp3cb		Sertad1
Six3		Zfp36		Ikbkb		Zfp94
Otx1		Mef2c		Gmeb2		Sirt3
Zbtb1		Mcm7		Chgb		Abt1
Nfic		Stat5b		Uhrf2		Cebpb
Tnfaip3		Satb2		Nkd2		Naca
Fmnl2		Khdrbs1		2810021J22Rik		Tob1
Ehf		Mcm5		Gmeb1		Tsg101
Nab1		Notch3		Phf8		Cops5
Nfib		Nr4a1		Ncor1		Drg1
Zfx		Rarb		Helz		Psmc3
Klf3		Pdlim4		Ppargc1a		Maff
Nudt12		Nhlh1		Hivep2		Zfp112
Dmrt3		Hdac2		Ankfy1		Sqstm1
Mcm4		Olig2		Nfe2l2		Rab18
Atf1		Arid1a		Ebf3		Polr2j
Trip6		Polr2a		Zfp423		Phf1
Tcf7l2		Ldb1		Ppp1r12b		Mycbp
Tceal1		Tcf4		Invs		Ssbp4
Hmga2		Smarce1		Mafg		Gtf3a
Per1		Trip13		Trip4		Polr3h
Klf15		Zfp606		Zdhhc5		Ddit3
Sap30		Taf10		Lmo2		Nfkbib
Limd1		Maz		Dot1l		Scand1
Pias1		Dlx6		Foxj2		Btf3
Elf1		Fus		Purb		Ptges2
Cdkn2c		Dmrta1		Nfix		Pfdn1
Foxp2		Zfp2		Pou6f1		Esrra
Stat3		Ppp1r12c		Pou2f2		B930041F14Rik
Six2		Phf5a		Myt1l		Ppp1r10
Thrb		Ar		Emx2		Ssbp2
Hmg20b		Neurog1		Phf2		C1d
Tle2		Zfp207		Atf5		Mta3
Zfp60		Sox11		Cdc5l		Fank1
Nfe2l3		Lef1		Tcea1		Cops2
Nmi		Hes6		Gtf3c4		Eomes
Myc		Atf3		Ubn1		Hdac1
Hmgcs1		Lyl1		Etv4		Sap18
Mta1		Rnps1		Atf2		Hdac5
Wasl		Tmpo		Aebp2		Sirt5
Trp53		Ash2l		Foxj1		Ugp2
Snai2		Prox1		Ankhd1		Atf4
Tfap4		Thrap3		Klf13		Rnf14
Hey1		Basp1		Ahr		Tbpl1
Klf5		Pbx2		Srf		Acyp2
Nfkbie		E2f1		Ank1		Sin3b
Zfp612		Rfx1		Mapk1		Hsbp1
Crem		Ctnnbl1		Zfp597		Tcf15
Fbxw7		Mllt1		Pura		Polr2g
Rab8b		Spib		Arhgap17		Nfatc1
Rps6ka4		Maml1		Crebbp		Zfp263
Cebpz		Gtf2f2		Phf12		Usf1
Drap1		Nfya		Pogk		Smarcb1
Nr2e1		Bard1		Mllt3		Tle3
Yy1		Zmynd11		Cbx4		Nfkbil1
Tfdp2		Bcl3		Mtpn		Rab25
Zfp282		Rem2		Zfp180		Arid5b
Rai1		Myb		Caskin1		Rab8a
Tbx1		Hsf2		Zfp9		Psmd9
Sp1		Zfp553		Papola		Hsf1
Zfp36l1		Insm1		Ncoa6		Nrf1
Stat1		Arnt2		Ash1l
Ccnt1		Fosb		Nfe2l1
Nr3c1		Etv6		Pknox2
Rest		Nhlh2		Erf
Pms1		Dlx5		Nptxr
Nsd1		Dlx3		Atf7
Sox9		Pou2af1		Ebf1
Irf2		Bach2		Arid4a
Atf7ip		Lmo1		Taf3
Hnf4g		Ascl3		Dido1
Ets1		St18		Fem1a
Rel		Sec14l2		Mga
Junb		Dach1		Mxi1
Srebf1		Cdk2		Usp49
Zcchc8		Ptma		Pbx3
Relb		Mtf2		Ebf4
Notch1		Pou2f1		Zfp287
Adnp		Gtf2i		Sox12
Pax6		Hbp1		Hipk2
Rnf4		Asxl1		Brpf1
Dek		Rara		Bcl11a
Zfp219		Foxi1		Scap
Rora		Nfe2		Pgr
Etv1		Smarca4		Foxo3
Sin3a		Neurod6		Ppp1r16b
Elf3		Hcls1		Peg3
Zfp148		Tle6		Ubp1
Zfp146		Sirt6		Lrrc6
Mbd3		Cited2		Cbx2
Ctcf		Hcfc1		Shprh
Otx2		Rorc		Ubtf
Nrip1		Fem1b		Dnmt3a
Sall1		Sncaip		Arid3a
Stat6		Satb1		Ankrd10
Tle4		Mybl2
Rbl2		Tcf3
Gli3		Aes
Ddx54		Cnot7
Nr3c2		Jun
Isl1		Rcor1
Fah		Ruvbl1
Elk4		E2f2
Hif1a		Bcor
Dmrt2
Sox5
Sox6
Srebf2
Elf2
Mnat1
Nr2f6
4930522L14Rik
Keap1
Ankrd6
Pdcd11
Scmh1
Zfp68
Hmga1
Irf6
Trp63
Pitx1
Hey2
Lmo4
Rxra
Foxc1
Atm
Foxn2
Rbl1
Epas1
Cebpa
Lsm11
Nr1d2
Sp3
Ssrp1
Foxo1
