# Supplementary material for: The role of the NMD factor UPF3B in olfactory sensory neurons
Source: eLife. 2020 Aug 10;9:e57525. doi: 10.7554/eLife.57525 (PMC7452722; doi:10.7554/eLife.57525)
Supplement: Supplementary file 5. — (1) Immune genes enriched in Upf3b-null HBC, GBC, iOSN, and mOSN sub-clusters identified by scRNA-seq analysis. (2) NIFs present in immune genes expressed in Upf3b-null OSNs. [file elife-57525-supp5.xlsx]

## Sheet: enriched immune genes
Enriched immune genes in each Upf3b-null cell cluster
Cell clusters	Symbol	p_val	avg_logFC	pct.1	pct.2	p_val_adj
HBC_1	Ifitm3	2.05418e-94	1.27465	0.822	0.194	3.98552e-90
	Trim29	1.53425e-80	0.689321	0.303	0.029	2.97675e-76
	Ackr4	5.25723e-74	0.571792	0.211	0.015	1.02001e-69
	Cxcl12	4.00124e-69	0.652403	0.27	0.027	7.7632e-65
	S100a8	7.49054e-41	1.72337	0.947	0.689	1.45331e-36
	S100a9	8.30605e-39	1.75101	0.914	0.625	1.61154e-34
	Wfdc21	3.49959e-28	1.21307	0.454	0.149	6.7899e-24
	Ifitm1	9.65486e-26	0.578907	0.408	0.123	1.87324e-21
	Camp	4.50316e-21	1.61901	0.743	0.422	8.73703e-17
	Ltf	7.86383e-19	0.664883	0.487	0.207	1.52574e-14
	Lcn2	1.30977e-17	1.26236	0.414	0.17	2.54122e-13
	Wfdc18	4.72595e-16	0.393937	0.868	0.518	9.16929e-12
	Reg3g	2.64749e-13	0.286636	0.434	0.193	5.13666e-09
	Wfdc2	1.53981e-11	0.2897	0.395	0.177	2.98754e-07
	B2m	9.39707e-11	0.574971	0.408	0.208	1.82322e-06
	Mif	1.48242e-09	0.45308	0.5	0.29	2.87618e-05
	Pglyrp1	3.21995e-09	0.692701	0.237	0.099	6.24734e-05
	Grn	9.78762e-08	0.327506	0.224	0.097	0.00189899
	Cyba	2.88604e-07	0.557194	0.204	0.09	0.00559949
	Cd24a	3.46568e-07	0.321037	0.283	0.14	0.0067241
HBC_2	Ifitm3	7.7448e-124	2.20954	0.949	0.194	1.50265e-119
	Ifitm1	4.77202e-89	1.55164	0.701	0.121	9.25868e-85
	Cxcl12	2.04306e-80	0.81445	0.325	0.027	3.96395e-76
	Ifitm2	7.10072e-69	1.46192	0.846	0.247	1.37768e-64
	Ccl20	3.26687e-66	1.56464	0.256	0.02	6.33838e-62
	Defb1	8.07352e-63	0.855141	0.291	0.028	1.56643e-58
	Mif	7.41988e-48	1.22146	0.795	0.287	1.43961e-43
	Trim29	5.34608e-44	0.657847	0.256	0.03	1.03725e-39
	Cd74	5.70427e-22	1.14385	0.453	0.153	1.10674e-17
	B2m	3.09011e-13	0.704961	0.462	0.209	5.99544e-09
HBC_3	Ifitm1	1.92186e-93	1.86429	0.827	0.122	3.7288e-89
	Ifitm3	2.86897e-81	1.79698	0.951	0.197	5.56637e-77
	Defb1	1.32818e-73	1.04374	0.37	0.028	2.57693e-69
	Wfdc2	1.97883e-72	1.79084	0.864	0.175	3.83933e-68
	Cd14	4.16529e-53	0.869106	0.247	0.017	8.0815e-49
	Sftpd	5.91655e-53	0.961243	0.284	0.023	1.14793e-48
	Lbp	1.64902e-51	0.689335	0.247	0.018	3.19943e-47
	Lgals3	8.40002e-46	1.03157	0.494	0.077	1.62977e-41
	Ifitm2	9.44336e-36	1.08133	0.802	0.249	1.8322e-31
	Axl	9.44981e-36	0.550896	0.21	0.018	1.83345e-31
	Reg3g	5.13951e-35	1.95243	0.679	0.193	9.97168e-31
	Ccl20	3.43903e-30	1.2797	0.21	0.021	6.6724e-26
	Trim29	8.52354e-28	0.500146	0.247	0.031	1.65374e-23
	Apobec3	6.49195e-20	0.623878	0.296	0.058	1.25957e-15
	Mif	1.08234e-19	0.871249	0.704	0.289	2.09996e-15
	Anxa1	8.53633e-18	0.684843	0.395	0.102	1.65622e-13
	Pycard	1.13467e-14	0.421097	0.235	0.048	2.20149e-10
	Trim8	2.12267e-09	0.382614	0.222	0.061	4.1184e-05
	Xrcc5	4.53329e-09	0.547319	0.247	0.077	8.7955e-05
	Bpifa1	3.46508e-07	2.31941	0.728	0.552	0.00672295
HBC_4	Defb1	1.91373e-243	0.977543	0.408	0.023	3.71301e-239
	Wfdc2	3.81191e-208	1.66866	0.892	0.167	7.39586e-204
	Ifitm1	2.03462e-126	1.18592	0.646	0.117	3.94757e-122
	Ifitm3	3.4144e-102	1.09799	0.749	0.192	6.62461e-98
	Reg3g	1.69056e-87	1.59402	0.664	0.188	3.28003e-83
	Alcam	2.44056e-80	0.736797	0.39	0.065	4.73518e-76
	Apobec3	1.77352e-74	0.663653	0.345	0.055	3.44097e-70
	Trim29	1.76137e-71	0.527275	0.242	0.028	3.41741e-67
	Lgals3	2.54051e-70	0.868966	0.395	0.074	4.92911e-66
	Anxa1	4.87042e-69	1.01762	0.453	0.098	9.44958e-65
	S100a8	3.70573e-66	1.20895	0.987	0.687	7.18987e-62
	S100a9	3.57047e-65	1.18307	0.978	0.622	6.92743e-61
	Dmbt1	8.74045e-52	0.347945	0.314	0.06	1.69582e-47
	Ltf	1.67754e-44	1.08093	0.574	0.204	3.25476e-40
	B2m	1.52691e-40	0.739993	0.561	0.205	2.96251e-36
	Wfdc21	3.58216e-37	0.831275	0.453	0.147	6.9501e-33
	Pglyrp1	2.00624e-35	0.977351	0.345	0.096	3.89251e-31
	Trim25	9.25774e-33	0.386633	0.22	0.045	1.79619e-28
	Nfkb1	2.33901e-32	0.414673	0.215	0.044	4.53816e-28
	Wfdc18	1.44668e-29	0.283719	0.946	0.514	2.80686e-25
	Camp	3.3766e-27	0.837727	0.771	0.42	6.55129e-23
	Lcn2	1.51599e-21	0.682294	0.413	0.168	2.94132e-17
	Trim56	3.14221e-21	0.331544	0.224	0.063	6.09652e-17
	Ddx21	7.23914e-20	0.460437	0.35	0.138	1.40454e-15
	Grn	3.30898e-19	0.363192	0.278	0.095	6.42007e-15
	Irak1	6.00488e-17	0.447581	0.278	0.105	1.16507e-12
	Cd24a	3.73445e-13	0.44024	0.309	0.138	7.24558e-09
	Matr3	3.50812e-08	0.293049	0.435	0.263	0.000680645
	Tyrobp	1.83468e-07	0.266453	0.296	0.16	0.00355964
GBC_1	Hmgb3	1.03589e-166	1.22693	0.838	0.189	2.00984e-162
	Trim59	5.89016e-166	0.670054	0.419	0.041	1.14281e-161
	Ifitm2	1.04124e-145	1.18328	0.893	0.239	2.02022e-141
	Mif	1.68694e-131	1.29133	0.877	0.28	3.27299e-127
	Polr3k	1.13552e-113	0.650197	0.577	0.104	2.20313e-109
	Lyar	1.36192e-113	0.743182	0.628	0.124	2.6424e-109
	Hmgb1	5.29701e-109	1.35441	0.996	0.827	1.02773e-104
	Hmgb2	1.25821e-107	1.67235	0.945	0.565	2.44117e-103
	Ctps	1.85259e-98	0.325867	0.265	0.027	3.59439e-94
	Ifitm3	1.18437e-78	0.609886	0.696	0.191	2.29792e-74
	Apobec3	2.7619e-70	0.303837	0.332	0.054	5.35864e-66
	G3bp1	1.56929e-63	0.709428	0.771	0.278	3.04474e-59
	Plscr1	1.29325e-61	0.308081	0.257	0.039	2.50917e-57
	Lgr4	3.59593e-50	0.364503	0.372	0.085	6.97682e-46
	Alcam	2.6077e-49	0.333391	0.316	0.066	5.05945e-45
	C1qbp	1.25533e-46	0.517315	0.684	0.247	2.43558e-42
	Cd24a	2.72007e-46	0.512477	0.47	0.135	5.27747e-42
	Matr3	1.463e-45	0.48711	0.708	0.257	2.83851e-41
	Nono	1.52872e-42	0.533314	0.818	0.359	2.96603e-38
	Ythdf2	8.6841e-33	0.253024	0.352	0.1	1.68489e-28
	Wfdc2	7.75084e-23	0.321099	0.451	0.174	1.50382e-18
	Ilf2	1.72669e-22	0.344448	0.636	0.295	3.35012e-18
	Sfpq	3.71846e-19	0.341285	0.822	0.483	7.21455e-15
GBC_2	Trim59	2.4019e-238	1.0172	0.683	0.042	4.66017e-234
	Hmgb3	3.0631e-124	1.47242	0.967	0.194	5.94303e-120
	Ifitm2	2.20979e-123	2.06156	0.992	0.245	4.28744e-119
	Hmgb2	2.31031e-85	2.53987	1	0.568	4.48246e-81
	Cxcl14	5.59154e-84	0.362839	0.236	0.014	1.08487e-79
	Hmgb1	1.91924e-74	1.51539	1	0.829	3.7237e-70
	Serping1	3.53959e-64	0.446239	0.285	0.026	6.86751e-60
	Apobec3	2.54968e-52	0.500975	0.39	0.056	4.9469e-48
	Polr3k	5.19093e-48	0.609312	0.545	0.109	1.00714e-43
	Nono	4.87147e-44	0.857624	0.911	0.362	9.45162e-40
	Cd1d1	6.95059e-41	0.347365	0.268	0.035	1.34855e-36
	Lyar	5.29063e-40	0.483281	0.577	0.129	1.02649e-35
	Cxcr4	3.42895e-38	0.404317	0.366	0.064	6.65285e-34
	Ptms	1.54602e-34	0.797198	0.911	0.437	2.99959e-30
	Matr3	3.52491e-34	0.612396	0.805	0.26	6.83902e-30
	G3bp1	1.19469e-33	0.648012	0.805	0.283	2.31795e-29
	Ilf2	5.06653e-33	0.662349	0.829	0.297	9.83008e-29
	Sfpq	7.84869e-33	0.697118	0.967	0.485	1.5228e-28
	Akirin2	1.89168e-32	0.621034	0.756	0.246	3.67024e-28
	Cadm1	1.0096e-30	0.732447	0.935	0.476	1.95883e-26
	Cd24a	8.96062e-26	0.452445	0.496	0.138	1.73854e-21
	Mif	1.36644e-23	0.581512	0.74	0.288	2.65116e-19
	Otub1	2.3439e-13	0.254643	0.577	0.226	4.54763e-09
	Psma1	2.53432e-13	0.427691	0.862	0.49	4.91708e-09
GBC_3	Cd1d1	4.74925e-194	0.651788	0.327	0.029	9.21449e-190
	Ifitm2	5.35387e-146	1.13383	0.788	0.237	1.03876e-141
	Cxcr4	3.31766e-109	0.662997	0.352	0.058	6.43693e-105
	Nono	3.01964e-83	0.821937	0.78	0.356	5.8587e-79
	Hmgb3	6.79121e-73	0.708076	0.569	0.191	1.31763e-68
	Polr3k	1.1314e-46	0.471754	0.349	0.106	2.19515e-42
	Cd24a	3.87566e-45	0.594233	0.393	0.134	7.51955e-41
	Ptms	1.21672e-43	0.575878	0.761	0.433	2.36068e-39
	Hmgb1	2.01405e-38	0.449158	0.973	0.826	3.90766e-34
	Sfpq	5.3193e-37	0.519439	0.78	0.481	1.03205e-32
	Ilf2	3.47826e-30	0.490672	0.577	0.294	6.74852e-26
	Akirin2	1.20315e-29	0.42342	0.514	0.244	2.33434e-25
	Cadm1	7.28158e-27	0.465875	0.745	0.472	1.41277e-22
	Dbnl	7.78137e-26	0.373239	0.305	0.119	1.50974e-21
	Mif	6.95983e-24	0.360183	0.541	0.285	1.35035e-19
	Ythdf2	1.06493e-23	0.34529	0.264	0.1	2.06618e-19
	Crcp	1.97755e-21	0.321901	0.253	0.098	3.83685e-17
	Lyar	9.86332e-17	0.28267	0.283	0.129	1.91368e-12
	Riok3	1.12259e-16	0.259214	0.294	0.134	2.17805e-12
	Otub1	4.04042e-16	0.29754	0.418	0.224	7.83923e-12
GBC_4	Matr3	2.22146e-11	0.313114	0.6	0.263	4.31008e-07
	Cd1d1	1.33235e-58	0.558278	0.322	0.035	2.58503e-54
	Fyn	5.03046e-53	0.646461	0.391	0.055	9.76011e-49
	Cd24a	6.60738e-39	0.796971	0.565	0.138	1.28196e-34
	Ltf	1.02147e-32	0.40274	0.696	0.206	1.98185e-28
	S100a9	1.98434e-30	0.771329	1	0.625	3.85002e-26
	S100a8	4.35239e-30	0.769208	1	0.69	8.44451e-26
	Ptms	7.28783e-26	0.713623	0.887	0.438	1.41398e-21
	Dhx9	2.88539e-25	0.524947	0.565	0.172	5.59824e-21
	Dmbt1	8.29671e-25	0.258001	0.304	0.062	1.60973e-20
	Cxcr4	1.04656e-22	0.495937	0.296	0.064	2.03053e-18
	Nono	8.58553e-18	0.533392	0.757	0.364	1.66576e-13
	Riok3	3.09233e-15	0.281062	0.417	0.136	5.99974e-11
	Otud4	1.83079e-14	0.294603	0.339	0.103	3.55209e-10
	Sfpq	3.80707e-14	0.537012	0.835	0.486	7.38649e-10
	Setd2	4.307e-14	0.26892	0.391	0.129	8.35644e-10
	F2rl1	4.52206e-14	0.320673	0.235	0.06	8.77371e-10
	Wfdc21	7.60446e-14	0.309466	0.426	0.15	1.47542e-09
	Ddx21	1.83611e-13	0.424713	0.391	0.139	3.56242e-09
	Trim56	1.04286e-12	0.279024	0.235	0.064	2.02336e-08
	Camp	1.21607e-12	0.326642	0.791	0.423	2.35942e-08
	Cyld	2.67231e-12	0.282947	0.27	0.081	5.18481e-08
	Ythdf2	3.17131e-11	0.264769	0.304	0.103	6.15298e-07
iOSN_1	Nono	9.76465e-24	0.515423	0.604	0.362	1.89454e-19
	Anxa1	5.09851e-45	0.520427	0.28	0.071	9.89212e-41
	Otub1	3.8477e-32	0.585752	0.484	0.223	7.46531e-28
	Ythdf2	3.38183e-09	0.264552	0.201	0.102	6.56143e-05
	Polr3k	1.29042e-11	0.314815	0.226	0.11	2.50367e-07
	Ptms	5.00625e-32	0.560998	0.726	0.435	9.71312e-28
	Akirin2	7.13092e-11	0.309769	0.399	0.247	1.38354e-06
	Cxcr4	1.72129e-67	0.606303	0.302	0.061	3.33964e-63
iOSN_2	Otub1	4.97133e-54	0.499747	0.483	0.216	9.64538e-50
	Cd81	2.06349e-69	0.488409	0.948	0.757	4.00359e-65
	Polr3k	4.97133e-54	0.298443	0.234	0.107	9.55163e-19
	Ptms	4.97133e-54	0.265285	0.653	0.431	5.69445e-18
	Akirin2	4.97133e-54	0.272384	0.411	0.243	2.06125e-15
	Crcp	4.97133e-54	0.294806	0.239	0.095	2.06974e-26
	Mbl2	4.97133e-54	0.350434	0.207	0.08	4.57433e-24
	Jagn1	4.97133e-54	0.307416	0.331	0.183	1.14033e-15
	Hmgb3	4.97133e-54	0.252294	0.38	0.193	1.05117e-20
iOSN_3	Nono	1.54342e-09	0.343589	0.618	0.364	2.99454e-05
	Fyn	2.41485e-16	0.360944	0.21	0.056	4.68529e-12
	Camp	4.97133e-54	0.258972	0.783	0.422	3.98958e-10
	Ltf	4.97133e-54	0.318971	0.554	0.206	7.0235e-20
	Pglyrp1	4.97133e-54	0.337583	0.312	0.098	2.10172e-13
	Dmbt1	4.97133e-54	0.256015	0.287	0.061	1.26652e-24
	Lcn2	4.97133e-54	0.390063	0.459	0.169	2.24711e-15
	Cd24a	4.97133e-54	0.328036	0.338	0.139	3.12228e-07
	Ythdf2	4.97133e-54	0.285229	0.229	0.103	0.0064543
	Dhx9	4.97133e-54	0.475876	0.439	0.172	3.07083e-13
	S100a8	4.97133e-54	0.787421	1	0.689	5.97769e-43
	Ptms	4.97133e-54	0.568887	0.809	0.437	3.77748e-17
	Dhx36	4.97133e-54	0.409671	0.42	0.204	9.89291e-07
	Ankrd17	4.97133e-54	0.335169	0.35	0.173	0.000116922
	Wfdc21	4.97133e-54	0.382058	0.376	0.15	1.29822e-09
	S100a9	4.97133e-54	0.853076	0.994	0.624	4.42657e-44
iOSN_4	Cd81	4.97133e-54	0.806512	0.984	0.759	2.91976e-100
	Gapdh	4.97133e-54	0.298662	0.844	0.708	3.52523e-12
	Mbl2	4.97133e-54	0.519887	0.231	0.082	3.30247e-22
mOSN_1	Cd81	4.97133e-54	0.709727	0.97	0.714	0
	Gapdh	4.97133e-54	0.438588	0.86	0.674	2.01159e-163
	Ifit1	4.97133e-54	0.396638	0.26	0.119	2.81192e-73
	Tollip	4.97133e-54	0.369924	0.396	0.243	5.39248e-60
	Tnfrsf21	4.97133e-54	0.32979	0.406	0.268	7.42565e-49
mOSN_2	S100a9	4.97133e-54	0.996855	0.96	0.626	4.80811e-20
	Camp	4.97133e-54	0.653526	0.667	0.425	4.67278e-05
	Reg3g	4.97133e-54	0.353448	0.413	0.195	0.00764805
	Dmbt1	4.97133e-54	0.302558	0.213	0.063	0.001182
	S100a8	4.97133e-54	1.04615	1	0.691	8.2428e-26
	Wfdc21	4.97133e-54	0.705911	0.413	0.151	2.30582e-07
	Wfdc18	4.97133e-54	0.599761	0.867	0.52	6.4138e-07
mOSN_3	S100a9	4.97133e-54	1.24615	0.996	0.587	0
	Camp	4.97133e-54	0.766515	0.829	0.381	4.365e-244
	Ltf	4.97133e-54	1.23834	0.608	0.165	0
	Reg3g	4.97133e-54	0.554699	0.511	0.16	1.5467e-192
	Pglyrp1	4.97133e-54	0.479348	0.264	0.082	1.25502e-93
	Dmbt1	4.97133e-54	1.44355	0.313	0.036	0
	S100a8	4.97133e-54	1.29343	1	0.658	0
	Lcn2	4.97133e-54	0.52645	0.387	0.148	7.2415e-103
	Cd24a	4.97133e-54	0.445843	0.312	0.122	7.30802e-75
	Irak1	4.97133e-54	0.261771	0.205	0.098	4.05142e-28
	Tyrobp	4.97133e-54	0.294543	0.286	0.149	1.10556e-31
	Dhx36	4.97133e-54	0.334837	0.357	0.189	1.1795e-40
	Serinc3	4.97133e-54	0.311869	0.533	0.351	4.24295e-35
	Wfdc21	4.97133e-54	0.675994	0.421	0.122	1.35536e-175
	Wfdc18	4.97133e-54	0.882951	0.973	0.471	9.75e-244
mOSN_4	Xrcc6	6.90149e-25	0.28414	0.297	0.136	1.33903e-20
	Cd81	4.97133e-54	0.354073	0.974	0.756	1.89692e-47
	Camp	4.97133e-54	0.768712	0.941	0.402	3.26746e-184
	Gapdh	4.97133e-54	0.312831	0.922	0.702	2.14527e-28
	Lcn2	4.97133e-54	0.399255	0.434	0.16	2.2385e-54
	Cyba	4.97133e-54	0.285166	0.234	0.085	5.39537e-28
	S100a8	4.97133e-54	0.62575	0.998	0.678	6.80522e-146
	S100a9	4.97133e-54	0.359051	0.986	0.612	7.21392e-94

## Sheet: Immune genes and NIFs
	Enriched immune genes and their NIFs
	Symbol	Ensembl Gene ID	dEJ	uORF	3'UTR length	Symbol	Ensembl Gene ID	dEJ	uORF	3'UTR length
	Ifitm3	ENSMUSG00000025492	FALSE	FALSE	139	Hmgb3	ENSMUSG00000015217	FALSE	FALSE	872
	Trim29	ENSMUSG00000032013	FALSE	FALSE	943	Trim59	ENSMUSG00000034317	FALSE	FALSE	1506
	Ackr4	ENSMUSG00000079355	FALSE	TRUE	546	Polr3k	ENSMUSG00000038628	FALSE	FALSE	2499
	Cxcl12	ENSMUSG00000061353	FALSE	FALSE	5188	Lyar	ENSMUSG00000067367	TRUE	FALSE	619
	S100a8	ENSMUSG00000056054	FALSE	FALSE	68	Hmgb1	ENSMUSG00000066551	FALSE	TRUE	509
	S100a9	ENSMUSG00000056071	FALSE	FALSE	114	Hmgb2	ENSMUSG00000054717	FALSE	FALSE	1872
	Wfdc21	ENSMUSG00000051748	FALSE	FALSE	155	Ctps	ENSMUSG00000028633	FALSE	FALSE	791
	Ifitm1	ENSMUSG00000025491	FALSE	TRUE	199	G3bp1	ENSMUSG00000018583	FALSE	FALSE	5170
	Camp	ENSMUSG00000038357	FALSE	FALSE	56	Plscr1	ENSMUSG00000032369	FALSE	FALSE	690
	Ltf	ENSMUSG00000032496	FALSE	TRUE	107	Lgr4	ENSMUSG00000050199	FALSE	TRUE	1730
	Lcn2	ENSMUSG00000026822	FALSE	FALSE	232	C1qbp	ENSMUSG00000018446	FALSE	FALSE	259
	Wfdc18	ENSMUSG00000000983	FALSE	FALSE	193	Nono	ENSMUSG00000031311	FALSE	FALSE	863
	Reg3g	ENSMUSG00000030017	FALSE	FALSE	216	Ythdf2	ENSMUSG00000040025	FALSE	TRUE	2012
	Wfdc2	ENSMUSG00000017723	FALSE	FALSE	177	Ilf2	ENSMUSG00000001016	FALSE	FALSE	760
	B2m	ENSMUSG00000060802	FALSE	FALSE	448	Sfpq	ENSMUSG00000028820	FALSE	FALSE	1272
	Mif	ENSMUSG00000033307	FALSE	FALSE	124	Cxcl14	ENSMUSG00000021508	FALSE	TRUE	1149
	Pglyrp1	ENSMUSG00000030413	FALSE	FALSE	99	Serping1	ENSMUSG00000023224	FALSE	FALSE	522
	Grn	ENSMUSG00000034708	FALSE	TRUE	337	Cd1d1	ENSMUSG00000028076	FALSE	FALSE	746
	Cyba	ENSMUSG00000006519	FALSE	FALSE	102	Cxcr4	ENSMUSG00000045382	FALSE	FALSE	644
	Cd24a	ENSMUSG00000047139	FALSE	FALSE	1500	Ptms	ENSMUSG00000030122	FALSE	FALSE	501
	Ifitm2	ENSMUSG00000060591	FALSE	FALSE	148	Akirin2	ENSMUSG00000028291	FALSE	FALSE	683
	Ccl20	ENSMUSG00000026166	FALSE	FALSE	1050	Cadm1	ENSMUSG00000032076	FALSE	FALSE	2995
	Defb1	ENSMUSG00000044748	FALSE	FALSE	609	Otub1	ENSMUSG00000024767	FALSE	FALSE	840
	Cd74	ENSMUSG00000024610	TRUE	FALSE	427	Psma1	ENSMUSG00000030751	FALSE	FALSE	294
	Cd14	ENSMUSG00000051439	FALSE	FALSE	226	Dbnl	ENSMUSG00000020476	FALSE	FALSE	963
	Sftpd	ENSMUSG00000021795	FALSE	FALSE	122	Crcp	ENSMUSG00000025532	FALSE	FALSE	935
	Lbp	ENSMUSG00000016024	FALSE	FALSE	902	Riok3	ENSMUSG00000024404	FALSE	FALSE	2040
	Lgals3	ENSMUSG00000050335	FALSE	TRUE	480	Fyn	ENSMUSG00000019843	FALSE	FALSE	1409
	Axl	ENSMUSG00000002602	FALSE	FALSE	1389	Dhx9	ENSMUSG00000042699	TRUE	FALSE	891
	Apobec3	ENSMUSG00000009585	TRUE	FALSE	1034	Otud4	ENSMUSG00000036990	FALSE	FALSE	3742
	Anxa1	ENSMUSG00000024659	FALSE	TRUE	286	Setd2	ENSMUSG00000044791	TRUE	0	548
	Pycard	ENSMUSG00000030793	FALSE	FALSE	3004	F2rl1	ENSMUSG00000021678	FALSE	FALSE	1441
	Trim8	ENSMUSG00000025034	FALSE	TRUE	778	Cyld	ENSMUSG00000036712	FALSE	TRUE	4932
	Xrcc5	ENSMUSG00000026187	FALSE	TRUE	230	Cd81	ENSMUSG00000037706	FALSE	FALSE	560
	Bpifa1	ENSMUSG00000027483	FALSE	FALSE	210	Mbl2	ENSMUSG00000024863	FALSE	FALSE	161
	Alcam	ENSMUSG00000022636	FALSE	TRUE	2675	Jagn1	ENSMUSG00000051256	FALSE	FALSE	844
	Dmbt1	ENSMUSG00000047517	FALSE	FALSE	395	Dhx36	ENSMUSG00000027770	FALSE	FALSE	2549
	Trim25	ENSMUSG00000000275	FALSE	FALSE	3572	Ankrd17	ENSMUSG00000055204	FALSE	FALSE	2116
	Nfkb1	ENSMUSG00000028163	TRUE	FALSE	2620	Gapdh	ENSMUSG00000057666	FALSE	TRUE	178
	Trim56	ENSMUSG00000043279	FALSE	FALSE	6812	Ifit1	ENSMUSG00000034459	FALSE	FALSE	1152
	Ddx21	ENSMUSG00000020075	FALSE	FALSE	2099	Tollip	ENSMUSG00000025139	FALSE	TRUE	978
	Irak1	ENSMUSG00000031392	FALSE	TRUE	1526	Tnfrsf21	ENSMUSG00000023915	FALSE	TRUE	1216
	Matr3	ENSMUSG00000037236	FALSE	FALSE	3405	Serinc3	ENSMUSG00000017707	FALSE	FALSE	2169
	Tyrobp	ENSMUSG00000030579	FALSE	FALSE	168	Xrcc6	ENSMUSG00000022471	FALSE	TRUE	167
