# Supplementary figures and images for: Nationalisme et valeurs de gauche
Source: eLife journal article supplement (doi:10.7554/elife.57525), 2001-01-01

Figure 1-figure supplement 1

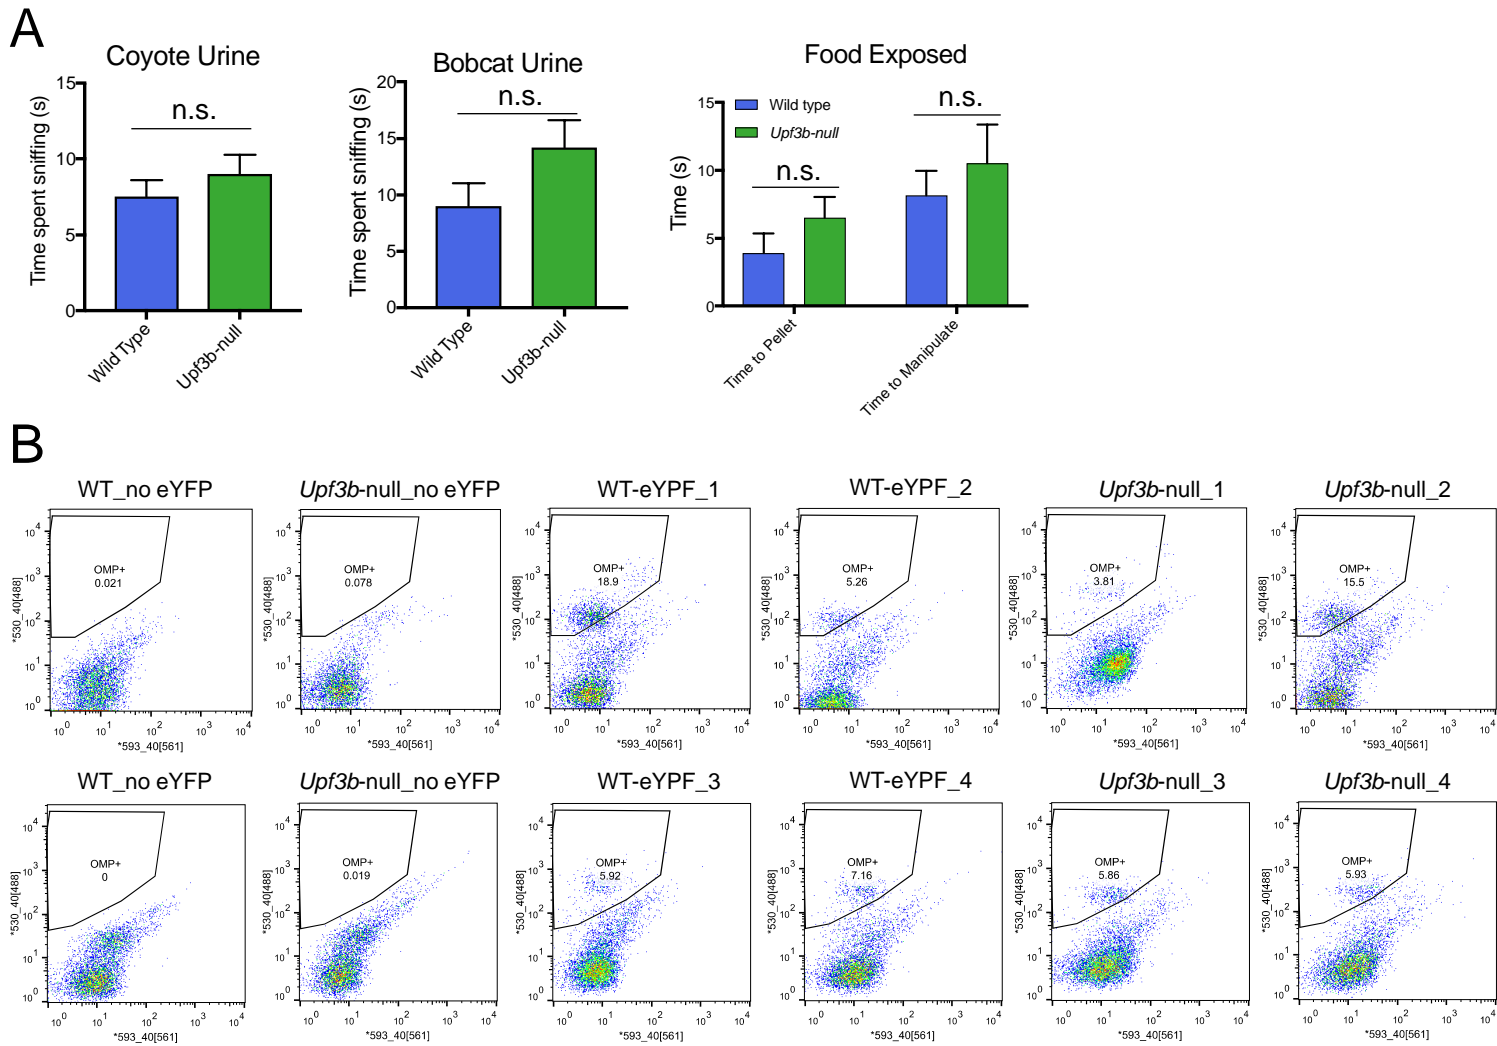

Supplement: supp [file elife_poa_e57525_Figure_1_figure_supplement_1.pdf › elife_poa_e57525_Figure_1_figure_supplement_1.pdf]

Figure 1-figure supplement 2

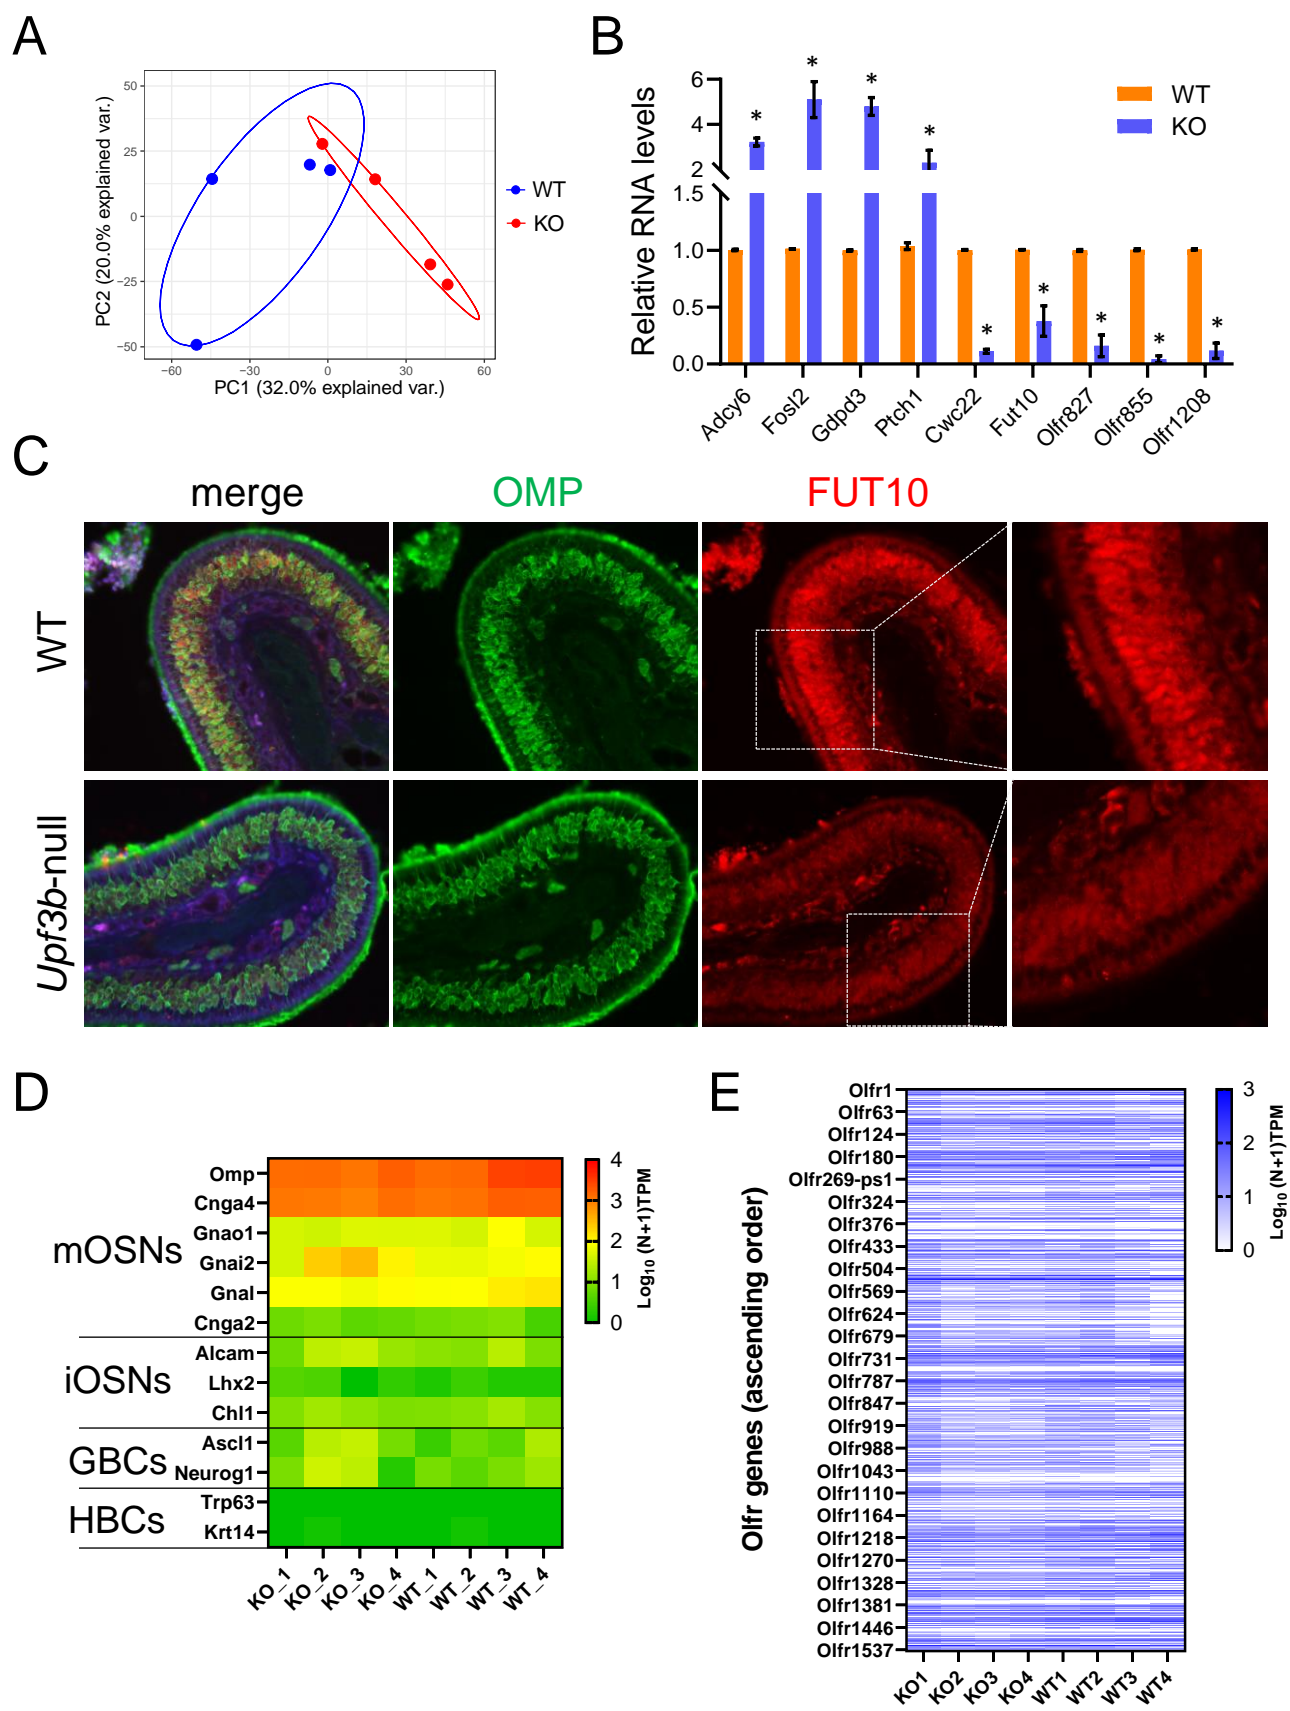

Supplement: supp [file elife_poa_e57525_Figure_1_figure_supplement_2.pdf › elife_poa_e57525_Figure_1_figure_supplement_2.pdf]

Figure 6-figure supplement 1

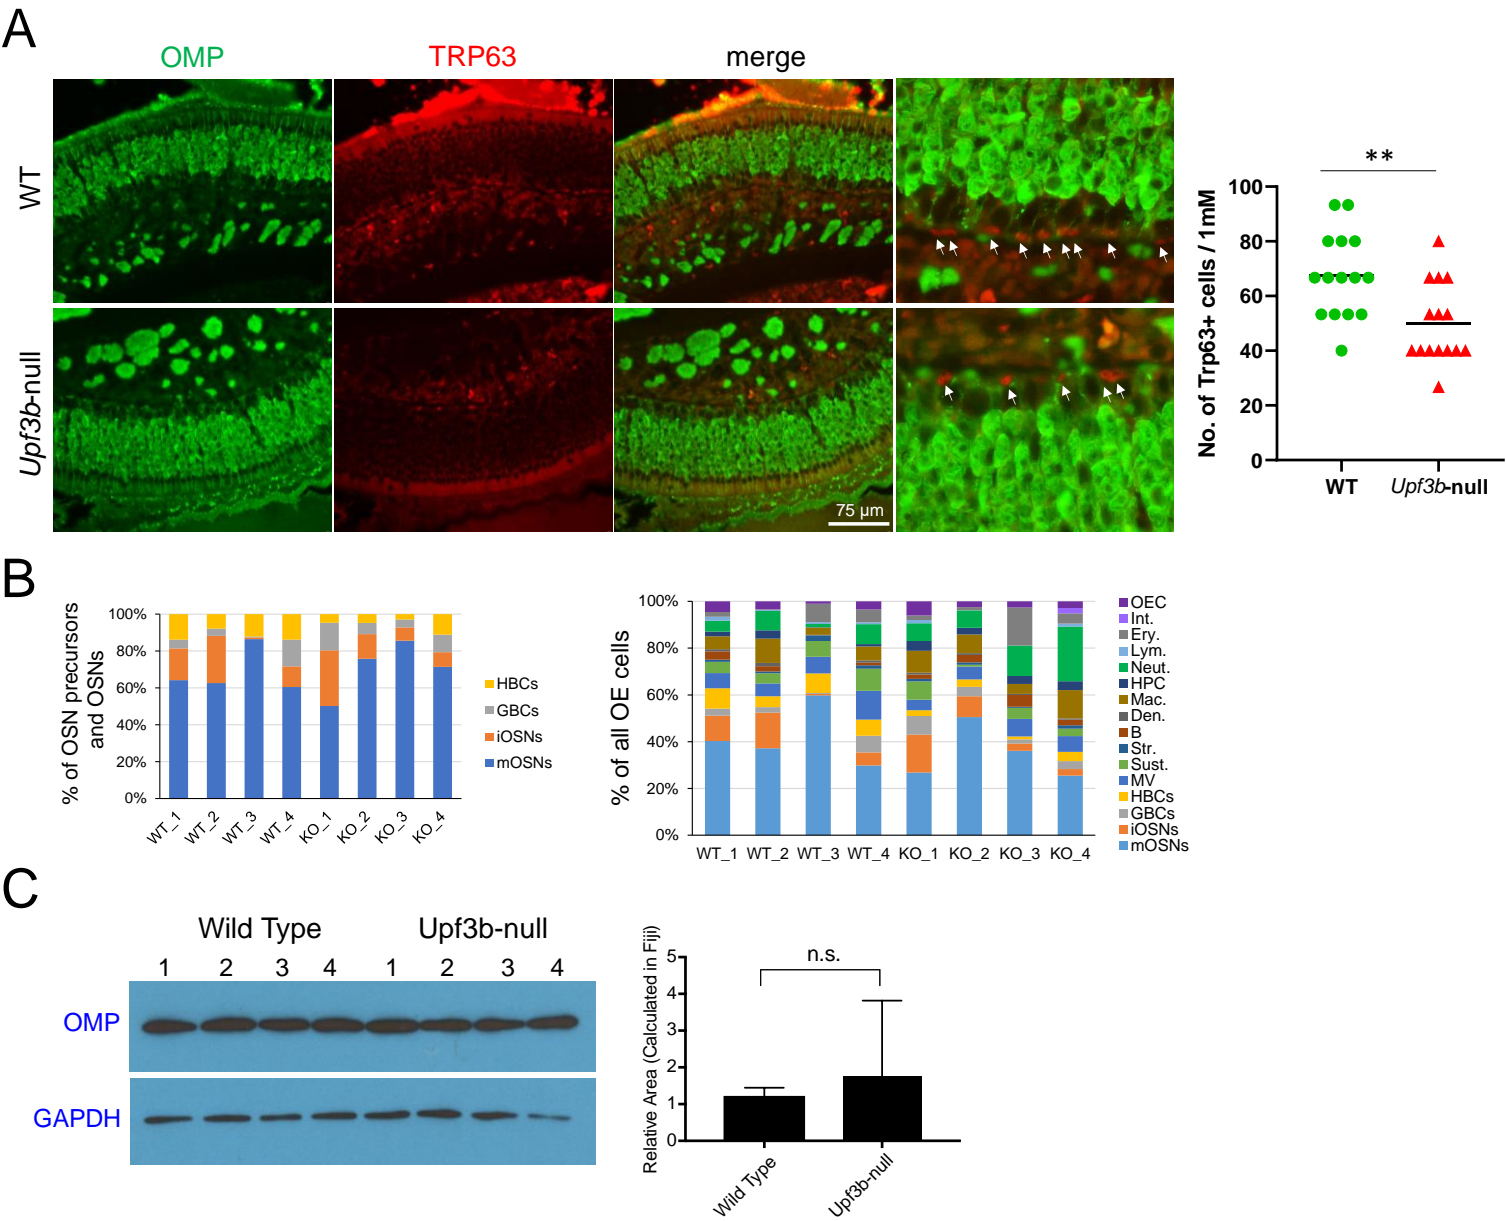

Supplement: supp [file elife_poa_e57525_Figure_6_figure_supplement_1.pdf › elife_poa_e57525_Figure_6_figure_supplement_1.pdf]

Figure 6-figure supplement 2

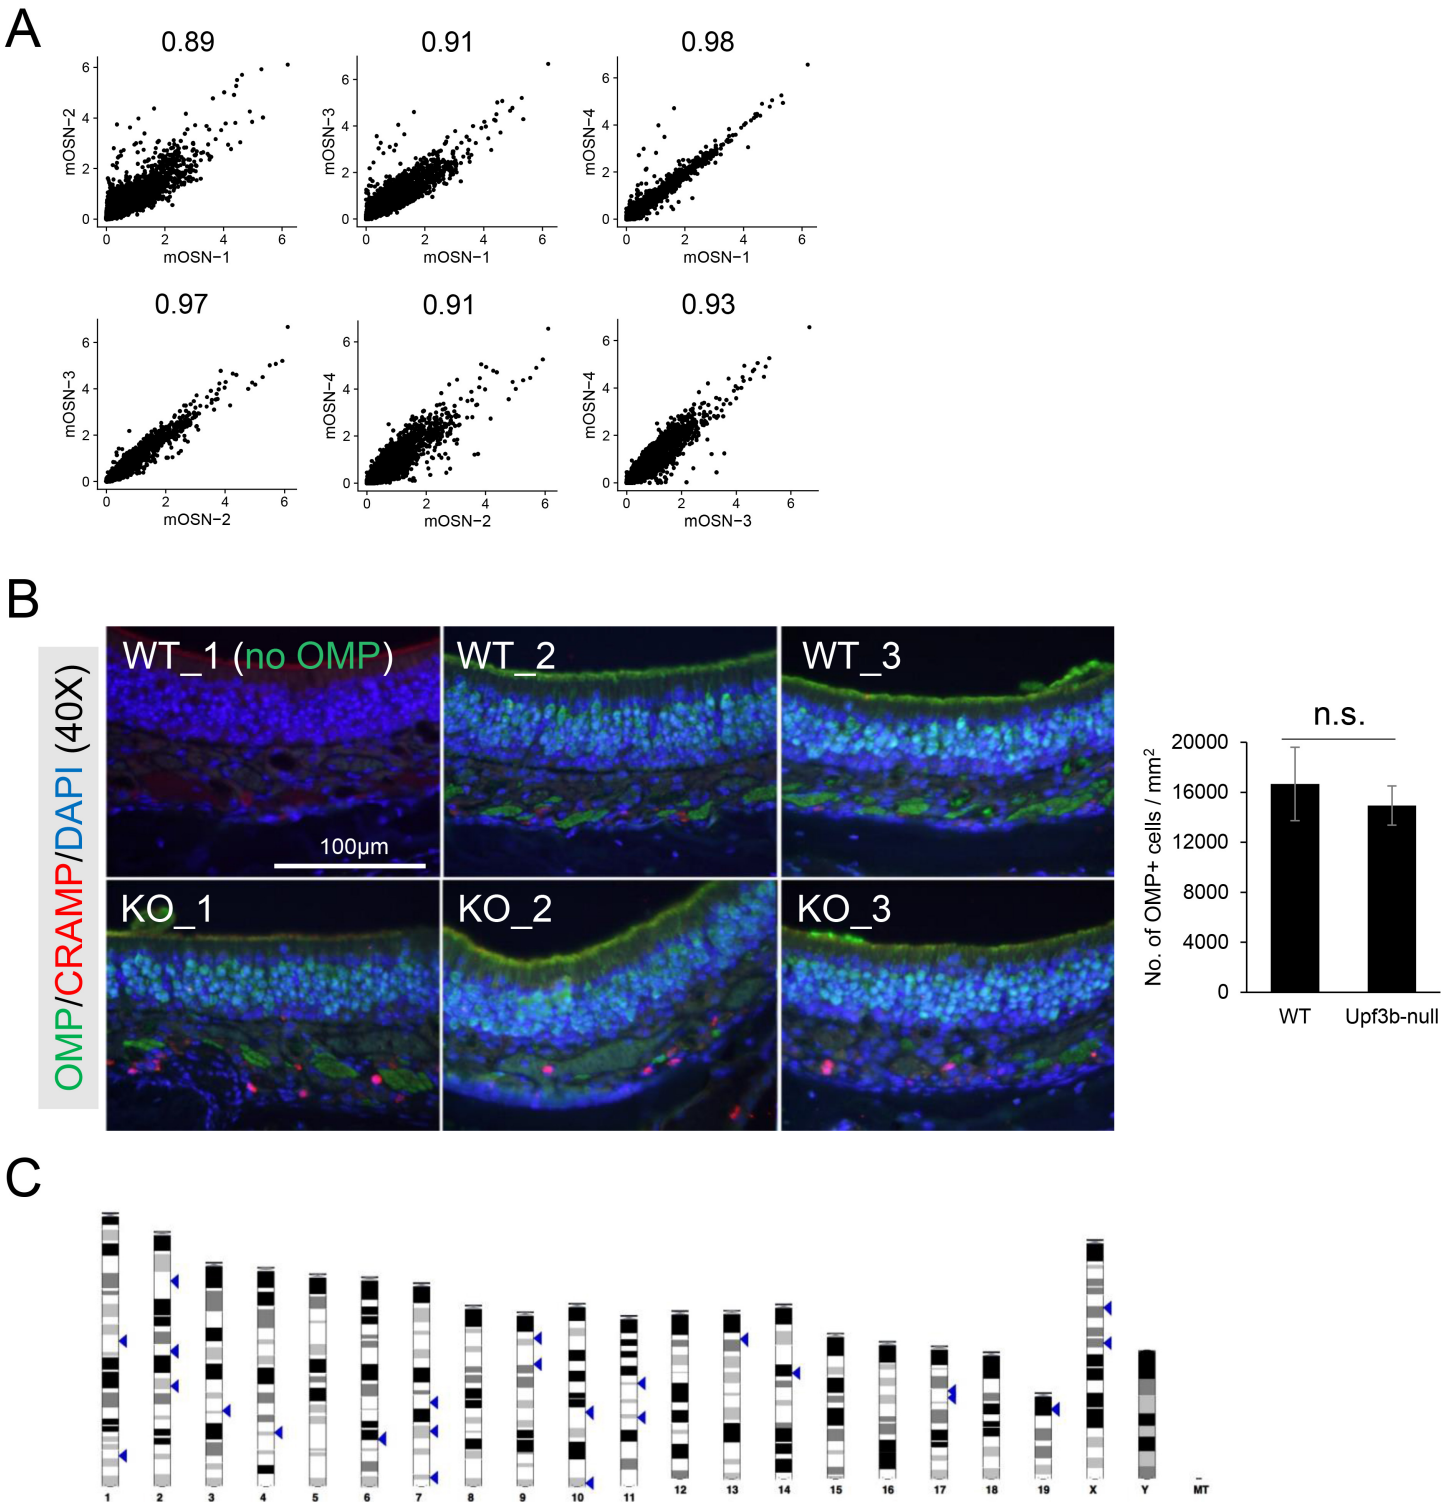

Supplement: supp [file elife_poa_e57525_Figure_6_figure_supplement_2.pdf › elife_poa_e57525_Figure_6_figure_supplement_2.pdf]
